# Supplementary material for: Cx3cr1-deficient microglia exhibit a premature aging transcriptome
Source: Life Sci Alliance. 2019 Nov 27;2(6):e201900453. doi: 10.26508/lsa.201900453 (PMC6892408; doi:10.26508/lsa.201900453)
Supplement: Supplementary file 1 [file LSA-2019-00453_TableS1.xlsx]

## Sheet: Sheet1
Current study - highest expression by TPM		Zheng et al. - highest expression in microglia by FPKM		Butovsky Microglia signature - enriched comapred to other brain cells		Hickman et al. Microglial sensome - transmembrane proteins
Cst3		Cst3		Cx3cr1		P2ry12
Ctsd		Ctsd		Adamts1		Tmem119
Hexb		C1qa		Egr1		Gpr34
Tmsb4x		Tmsb4x		Ccr5		Csf1r
Malat1		Hexb		Hspa1a		Cd53
C1qb		Ftl1		Olfr110		Siglech
Ctss		Fth1		Syngr1		Cx3cr1
C1qc		Ubc		Trem2		Selplg
Csf1r		Csf1r		Gpr34		Ly86
P2ry12		Sparc		Ltc4s		Fcgr3
Tyrobp		Ccl4		Cst3		Fcer1g
C1qa		Apoe		Gas6		Dap12
Itm2b		Ccl3		C1qb		Slco2b1
RP24-458F14.4		Laptm5		C1qc		Itgam
Laptm5		Zfp36		Sgce		Tgfbr1
Tmem119		Junb		Ctsd		Slc2a5
Cx3cr1		Rhob		Aif1		P2yr13
Sparc		Actb		Lair1		Ifngr1
Gpr34		Lgmn		Slc1a3		Itgb5
Selplg		C1qb		Fcrls		Ccr5
Lgmn		Cd83		Hexb		Cd74
B2m		C1qc		Lgmn		Emr1
Sepp1		Psap		Adrb1		Cmtm6
S100a8		Gm1821		C3ar1		Cd68
Serinc3		Glul		Stab1		Trem2
Cd81		Ctss		Lag3		Fcgr2b
Actb		Tyrobp		Hpgds		Cd52
Fcrls		Rps9		Scoc		Itgb2
Siglech		Selplg		Serpine2		Gi24
Ftl1		Dusp1		Pmp22		Entpd1
Fcgr3		Atf3		Abcc3		Fcgr1
Fcer1g		Eef1a1		Usp2		Cd180
Ctsz		Actg1		Cables1		Cmtm7
P2ry13		Rpl8		Etv5		Lgals9
Trem2		Ccrl2		Abca1		Tgfbr2
mt-Atp6		Sgk1		Mafb		Ecscr
Fth1		Ctsb		Il10ra		Tmem173
Grn		Rplp2-ps1		Pmepa1		Tlr2
Lyz2		Fos		Ptprm		Lag3
Sirpa		Itm2b		Slc24a3		Ltf
Cd9		B2m		Slc12a2		P2ry6
Gm28437		Gnb2l1		Tgfbr1		Il10ra
Ly86		Tmem119		Mertk		Lair1
Gm26191		Grn		Slc7a8		Gpr183
Apoe		Egr1		Kcnd1		Tmem37
Ppia		Ctsz		Plxdc2		Cd37
S100a9		Trem2		Sall1		Cd86
Unc93b1		Cd81		Csf1r		Slamf9
Psap		Eef2		Itgam		Tlr7
Ubb		Rps5		Olfml3		Cd14
				C1qa
				Siglech
				Kcnk13
				Slc46a1
				Sparc
				Entpd1
				P2ry13
				Slc2a5
				Ctsf
				P2rx7
				F11r
				Cttnbp2nl
				P2ry12
				Pros1
				Tmem119
				Slco2b1
				Itgb5
				Tlr7
				Tnfrsf11a
				Ptprc
				Fcgr1
				Adora3
				Tlr3
				Bin1
				Basp1
				Ccl2
				Jun
				Tanc2
				Bhlhe41
				Cd34
				Kctd12
				Tjp1
				Dagla
				Sall3
				Rhob
				P2ry6
