# Supplementary material for: Cx3cr1-deficient microglia exhibit a premature aging transcriptome
Source: Life Sci Alliance. 2019 Nov 27;2(6):e201900453. doi: 10.26508/lsa.201900453 (PMC6892408; doi:10.26508/lsa.201900453)
Supplement: Supplementary file 2 [file LSA-2019-00453_TableS2.xlsx]

## Sheet: Read Me
Comparison: 2 mo mice, KO vs WT
Tab 2: RSEM output table
GeneID	Gene symbol and ENSEMBL ID
baseMean	Average of all samples
log2FoldChange	Log2FoldChange for KO vs WT comparison
lfcSE	Standard eror of Log2(FC)
stat	Statistic
pvalue	P-value
padj	Adjusted p-value
symbol	Gene symbol
Tab 3: Filtred list: FDR (pvalue) < 0.05; baseMean > 4; Fold change > 30%

## Sheet: CX3CR1_RSEM_unstranded_DEG
GeneID	baseMean	log2FoldChange	lfcSE	stat	pvalue	padj	symbol
Cx3cr1/ENSMUSG00000052336.6/protein_coding	42591.7	-6.05571	0.049436	-122.496	0	0	Cx3cr1		728	up
Myo1b/ENSMUSG00000018417.10/protein_coding	799.043	0.584346	0.05051	11.5689	5.92159e-31	4.811e-27	Myo1b		1123	down
Limd1/ENSMUSG00000025239.2/protein_coding	456.038	0.754216	0.0703976	10.7137	8.78176e-27	4.75649e-23	Limd1
F5/ENSMUSG00000026579.8/protein_coding	16.2235	-1.00337	0.103299	-9.71319	2.6492e-22	1.07617e-18	F5
Angptl7/ENSMUSG00000028989.3/protein_coding	170.071	-0.808883	0.0850033	-9.5159	1.80142e-21	5.85424e-18	Angptl7
Rcbtb2/ENSMUSG00000022106.10/protein_coding	2249.26	-0.430209	0.0459509	-9.36238	7.79615e-21	2.11133e-17	Rcbtb2
1500015O10Rik/ENSMUSG00000026051.8/protein_coding	12.9379	-0.900138	0.0988966	-9.10181	8.88378e-20	2.06218e-16	1500015O10Rik
F630028O10Rik/ENSMUSG00000078122.4/antisense	33.7659	-1.01563	0.113217	-8.97067	2.94705e-19	5.98583e-16	F630028O10Rik
Clu/ENSMUSG00000022037.10/protein_coding	43.5846	-0.967313	0.108558	-8.91054	5.07864e-19	9.16921e-16	Clu
1810011O10Rik/ENSMUSG00000056313.5/protein_coding	90.4989	0.942449	0.111099	8.48294	2.1958e-17	3.56796e-14	1810011O10Rik
Strip2/ENSMUSG00000039629.10/protein_coding	9.94922	-0.839879	0.0997588	-8.41909	3.79412e-17	5.60461e-14	Strip2
Ttr/ENSMUSG00000061808.3/protein_coding	467.599	-0.776905	0.0936489	-8.29593	1.07737e-16	1.45884e-13	Ttr
Hfe/ENSMUSG00000006611.10/protein_coding	2271.91	-0.439322	0.0533005	-8.24237	1.68837e-16	2.11033e-13	Hfe
Lilra5/ENSMUSG00000070873.5/protein_coding	241.419	-0.70456	0.0875489	-8.04762	8.44226e-16	9.79845e-13	Lilra5
Enpp2/ENSMUSG00000022425.11/protein_coding	619.418	-0.748249	0.0932169	-8.02697	9.99101e-16	1.08229e-12	Enpp2
Mcemp1/ENSMUSG00000013974.2/protein_coding	35.2126	-0.843476	0.105677	-7.98165	1.44389e-15	1.46636e-12	Mcemp1
Ccr5/ENSMUSG00000079227.5/protein_coding	4156.13	-0.89855	0.11323	-7.9356	2.09483e-15	2.00229e-12	Ccr5
Ccr1l1/ENSMUSG00000064039.3/protein_coding	262.425	0.770351	0.0981627	7.8477	4.23738e-15	3.82517e-12	Ccr1l1
Lbp/ENSMUSG00000016024.5/protein_coding	8.19796	-0.697681	0.0890178	-7.83755	4.59433e-15	3.92912e-12	Lbp
Tns1/ENSMUSG00000055322.10/protein_coding	948.107	0.625771	0.080695	7.75477	8.85036e-15	7.19047e-12	Tns1
Adam8/ENSMUSG00000025473.12/protein_coding	44.5875	-0.828883	0.107201	-7.73206	1.05822e-14	8.18808e-12	Adam8
Slc11a1/ENSMUSG00000026177.7/protein_coding	4095.15	0.305087	0.0395608	7.71187	1.23991e-14	9.15786e-12	Slc11a1
Clec4a3/ENSMUSG00000043832.9/protein_coding	1189.38	-0.494218	0.0651003	-7.59163	3.15904e-14	2.2318e-11	Clec4a3
Sulf1/ENSMUSG00000016918.11/protein_coding	8.18673	-0.697059	0.0925729	-7.52984	5.08024e-14	3.43954e-11	Sulf1
Cd63/ENSMUSG00000025351.9/protein_coding	2527.45	-0.438521	0.0597206	-7.34287	2.09062e-13	1.35882e-10	Cd63
S100a11/ENSMUSG00000027907.4/protein_coding	81.621	-0.712032	0.0972861	-7.31895	2.49922e-13	1.56192e-10	S100a11
Dhrs9/ENSMUSG00000027068.6/protein_coding	10.8246	-0.567523	0.0778168	-7.29307	3.02979e-13	1.82337e-10	Dhrs9
Pxdc1/ENSMUSG00000021411.11/protein_coding	359.198	0.47919	0.0663231	7.22508	5.00798e-13	2.90624e-10	Pxdc1
AU020206/ENSMUSG00000097415.1/lincRNA	46.5095	0.792986	0.109977	7.2105	5.57476e-13	3.01948e-10	AU020206
Ppp1r1b/ENSMUSG00000061718.8/protein_coding	20.3912	-0.724498	0.100438	-7.21336	5.45894e-13	3.01948e-10	Ppp1r1b
Cd34/ENSMUSG00000016494.5/protein_coding	3744.68	0.495634	0.0688484	7.19892	6.0693e-13	3.18129e-10	Cd34
Kcnj13/ENSMUSG00000079436.3/protein_coding	16.0499	-0.663758	0.0925598	-7.17112	7.43876e-13	3.77726e-10	Kcnj13
Clec12a/ENSMUSG00000053063.7/protein_coding	69.4442	-0.808033	0.113311	-7.1311	9.9571e-13	4.75862e-10	Clec12a
Slc1a3/ENSMUSG00000005360.10/protein_coding	2072.64	-0.45125	0.0632709	-7.13202	9.89054e-13	4.75862e-10	Slc1a3
Msx1/ENSMUSG00000048450.10/protein_coding	6.22477	-0.642662	0.0902807	-7.11848	1.09124e-12	5.06616e-10	Msx1
Kl/ENSMUSG00000058488.6/protein_coding	34.7277	-0.648069	0.0914047	-7.0901	1.34011e-12	6.04871e-10	Kl
Ppfia4/ENSMUSG00000026458.9/protein_coding	5566.66	0.293646	0.0416463	7.05096	1.77689e-12	7.80342e-10	Ppfia4
Chil3/ENSMUSG00000040809.10/protein_coding	293.907	-0.561697	0.0799253	-7.02777	2.09861e-12	8.31716e-10	Chil3
Ntrk2/ENSMUSG00000055254.10/protein_coding	7.70534	-0.677881	0.0964032	-7.03172	2.03996e-12	8.31716e-10	Ntrk2
Plp2/ENSMUSG00000031146.6/protein_coding	22.0676	-0.720006	0.102426	-7.02953	2.07234e-12	8.31716e-10	Plp2
Vat1l/ENSMUSG00000046844.6/protein_coding	8.65411	-0.651163	0.0925581	-7.03519	1.98992e-12	8.31716e-10	Vat1l
Fcrls/ENSMUSG00000015852.9/protein_coding	31210.6	-0.410651	0.0585166	-7.01769	2.25571e-12	8.72691e-10	Fcrls
Sema4a/ENSMUSG00000028064.13/protein_coding	158.711	-0.701026	0.0999935	-7.01071	2.37111e-12	8.96004e-10	Sema4a
Chil1/ENSMUSG00000064246.6/protein_coding	45.3192	-0.692888	0.0990713	-6.99383	2.67485e-12	9.8781e-10	Chil1
Mgl2/ENSMUSG00000040950.9/protein_coding	89.8024	-0.788732	0.113063	-6.97602	3.03652e-12	1.09645e-09	Mgl2
Chst1/ENSMUSG00000027221.5/protein_coding	449.952	0.69698	0.0999695	6.97193	3.12623e-12	1.10431e-09	Chst1
Sell/ENSMUSG00000026581.10/protein_coding	71.4824	-0.588552	0.0849379	-6.9292	4.23227e-12	1.46319e-09	Sell
Amica1/ENSMUSG00000048534.6/protein_coding	11.5169	-0.628285	0.0910978	-6.89681	5.31818e-12	1.80031e-09	Amica1
Nedd4/ENSMUSG00000032216.10/protein_coding	14.9178	-0.762706	0.110827	-6.88193	5.90491e-12	1.95814e-09	Nedd4
Il18rap/ENSMUSG00000026068.7/protein_coding	18.0676	-0.727363	0.107136	-6.78917	1.12779e-11	3.66509e-09	Il18rap
Slc39a12/ENSMUSG00000036949.12/protein_coding	158.524	-0.653277	0.0965978	-6.76285	1.35302e-11	4.31084e-09	Slc39a12
Gpm6a/ENSMUSG00000031517.7/protein_coding	12.9197	-0.696941	0.10438	-6.67696	2.43954e-11	7.6231e-09	Gpm6a
Gp49a/ENSMUSG00000089672.4/protein_coding	42.6171	-0.751317	0.1132	-6.63708	3.19968e-11	9.80972e-09	Gp49a
Lilra6/ENSMUSG00000030427.13/protein_coding	16.2142	-0.610071	0.0919976	-6.63138	3.32573e-11	1.00074e-08	Lilra6
Gm13889/ENSMUSG00000087006.3/protein_coding	59.3836	-0.697276	0.105454	-6.61213	3.78817e-11	1.11916e-08	Gm13889
Jam3/ENSMUSG00000031990.10/protein_coding	194.749	-0.579669	0.0881132	-6.57868	4.7463e-11	1.37719e-08	Jam3
Lgals1/ENSMUSG00000068220.5/protein_coding	35.2267	-0.736486	0.112173	-6.56562	5.18153e-11	1.4771e-08	Lgals1
Sec14l2/ENSMUSG00000003585.9/protein_coding	66.7804	0.685043	0.104943	6.52774	6.6771e-11	1.87062e-08	Sec14l2
Anxa1/ENSMUSG00000024659.10/protein_coding	160.266	-0.511255	0.078514	-6.51164	7.43345e-11	2.04722e-08	Anxa1
Car12/ENSMUSG00000032373.10/protein_coding	6.84875	-0.576131	0.0886525	-6.49876	8.0985e-11	2.19321e-08	Car12
Cfp/ENSMUSG00000001128.7/protein_coding	64.5796	-0.731671	0.113327	-6.45628	1.07311e-10	2.85852e-08	Cfp
Pygl/ENSMUSG00000021069.12/protein_coding	201.766	-0.65391	0.102156	-6.4011	1.54262e-10	4.04292e-08	Pygl
Car2/ENSMUSG00000027562.8/protein_coding	16.5107	-0.663445	0.104391	-6.35537	2.07928e-10	5.36289e-08	Car2
AW112010/ENSMUSG00000075010.4/protein_coding	170.81	-0.513354	0.0810772	-6.33167	2.42519e-10	6.0626e-08	AW112010
Ltb4r1/ENSMUSG00000046908.5/protein_coding	21.1249	-0.680925	0.107506	-6.33385	2.39125e-10	6.0626e-08	Ltb4r1
S100a6/ENSMUSG00000001025.4/protein_coding	48.054	-0.610005	0.0964149	-6.32688	2.50169e-10	6.15909e-08	S100a6
Spint1/ENSMUSG00000027315.9/protein_coding	2070.07	0.36377	0.0576758	6.30716	2.84206e-10	6.89263e-08	Spint1
Il1f9/ENSMUSG00000044103.4/protein_coding	7.87708	-0.448574	0.0711875	-6.3013	2.95163e-10	7.0531e-08	Il1f9
Mmp9/ENSMUSG00000017737.2/protein_coding	206.592	-0.453459	0.0723174	-6.2704	3.60128e-10	8.48076e-08	Mmp9
Ttc28/ENSMUSG00000033209.13/protein_coding	680.977	0.369801	0.0592575	6.24057	4.35966e-10	1.012e-07	Ttc28
Gadd45g/ENSMUSG00000021453.2/protein_coding	157.981	0.605996	0.0975217	6.21396	5.16643e-10	1.16596e-07	Gadd45g
Ptgds/ENSMUSG00000015090.9/protein_coding	15.9637	-0.653766	0.105181	-6.21563	5.11193e-10	1.16596e-07	Ptgds
Ccr3/ENSMUSG00000035448.8/protein_coding	14.8663	-0.640249	0.10338	-6.19316	5.89695e-10	1.3126e-07	Ccr3
Emb/ENSMUSG00000021728.7/protein_coding	57.561	-0.680804	0.110079	-6.1847	6.22187e-10	1.36621e-07	Emb
Dusp6/ENSMUSG00000019960.7/protein_coding	7047.29	0.445698	0.0720988	6.18177	6.33884e-10	1.37333e-07	Dusp6
Crispld2/ENSMUSG00000031825.12/protein_coding	7.05195	-0.448177	0.0725297	-6.17923	6.44168e-10	1.37725e-07	Crispld2
Ablim1/ENSMUSG00000025085.12/protein_coding	179.97	-0.572636	0.0928028	-6.17046	6.80913e-10	1.4369e-07	Ablim1
Armcx3/ENSMUSG00000049047.7/protein_coding	628.217	-0.269107	0.0436809	-6.16075	7.23993e-10	1.50823e-07	Armcx3
Atp1b1/ENSMUSG00000026576.8/protein_coding	12.6399	-0.623573	0.101801	-6.12543	9.04373e-10	1.86015e-07	Atp1b1
Adora1/ENSMUSG00000042429.8/protein_coding	29.8139	0.689399	0.112596	6.12277	9.19652e-10	1.86793e-07	Adora1
Aagab/ENSMUSG00000037257.7/protein_coding	1386.57	-0.24458	0.0399789	-6.11773	9.49172e-10	1.88087e-07	Aagab
Wfdc17/ENSMUSG00000069792.5/protein_coding	44.1957	-0.692732	0.113218	-6.11858	9.44116e-10	1.88087e-07	Wfdc17
Slc4a10/ENSMUSG00000026904.13/protein_coding	8.03106	-0.497554	0.0818507	-6.0788	1.21088e-09	2.37056e-07	Slc4a10
Htra3/ENSMUSG00000029096.11/protein_coding	169.524	0.573606	0.0944715	6.07174	1.26536e-09	2.44771e-07	Htra3
Usp35/ENSMUSG00000035713.11/protein_coding	655.953	0.450438	0.0742921	6.06306	1.33552e-09	2.55304e-07	Usp35
H2-Q10/ENSMUSG00000067235.10/protein_coding	18.251	-0.635638	0.104926	-6.05796	1.3786e-09	2.60476e-07	H2-Q10
St6gal1/ENSMUSG00000022885.11/protein_coding	1141.43	-0.393241	0.0651189	-6.03882	1.55245e-09	2.89952e-07	St6gal1
Bin2/ENSMUSG00000098112.3/protein_coding	8310.63	0.253549	0.0420677	6.02718	1.66847e-09	3.08079e-07	Bin2
Acot13/ENSMUSG00000006717.6/protein_coding	229.855	-0.443158	0.0738967	-5.99699	2.0101e-09	3.66989e-07	Acot13
Gpr165/ENSMUSG00000031210.6/protein_coding	1796.79	-0.543325	0.0906832	-5.99147	2.07953e-09	3.75448e-07	Gpr165
Chchd10/ENSMUSG00000049422.6/protein_coding	10.1031	-0.577265	0.0967943	-5.96383	2.46392e-09	4.39959e-07	Chchd10
Tnf/ENSMUSG00000024401.10/protein_coding	50.982	0.660821	0.111106	5.94763	2.72045e-09	4.80485e-07	Tnf
Ncaph/ENSMUSG00000034906.11/protein_coding	279.242	-0.399873	0.0673889	-5.93382	2.95974e-09	5.11626e-07	Ncaph
Sgms2/ENSMUSG00000050931.6/protein_coding	6.49695	-0.426842	0.0719287	-5.93424	2.95218e-09	5.11626e-07	Sgms2
Fcnb/ENSMUSG00000026835.11/protein_coding	5.58391	-0.416213	0.070187	-5.93006	3.02823e-09	5.17955e-07	Fcnb
Abat/ENSMUSG00000057880.8/protein_coding	11.5858	-0.60781	0.102585	-5.92496	3.12381e-09	5.28737e-07	Abat
A2m/ENSMUSG00000030111.8/protein_coding	5.02013	-0.457421	0.0774145	-5.90873	3.44763e-09	5.64564e-07	A2m
Blvra/ENSMUSG00000001999.11/protein_coding	343.28	-0.48031	0.0812782	-5.90946	3.43226e-09	5.64564e-07	Blvra
Kcne2/ENSMUSG00000039672.8/protein_coding	7.38346	-0.472986	0.0800079	-5.91174	3.3851e-09	5.64564e-07	Kcne2
Tspan4/ENSMUSG00000025511.10/protein_coding	1216.99	-0.402614	0.0681536	-5.90745	3.47446e-09	5.64564e-07	Tspan4
Ccr1/ENSMUSG00000025804.4/protein_coding	299.57	-0.665898	0.113015	-5.89214	3.81221e-09	6.13313e-07	Ccr1
Stard8/ENSMUSG00000031216.9/protein_coding	979.054	-0.372656	0.0638793	-5.83375	5.41955e-09	8.63356e-07	Stard8
Fpr1/ENSMUSG00000045551.7/protein_coding	20.2902	-0.558079	0.0957073	-5.8311	5.50643e-09	8.68679e-07	Fpr1
Mrgpra2b/ENSMUSG00000096719.1/protein_coding	6.03143	-0.386597	0.0666569	-5.79981	6.63885e-09	1.03726e-06	Mrgpra2b
Igfbp2/ENSMUSG00000039323.14/protein_coding	18.9687	-0.445904	0.0769762	-5.79275	6.92424e-09	1.07154e-06	Igfbp2
Gprasp2/ENSMUSG00000072966.7/protein_coding	341.784	-0.481539	0.0833145	-5.77977	7.48038e-09	1.14669e-06	Gprasp2
Sostdc1/ENSMUSG00000036169.5/protein_coding	7.20961	-0.476136	0.0824283	-5.77637	7.63313e-09	1.15917e-06	Sostdc1
Folr1/ENSMUSG00000001827.7/protein_coding	7.57938	-0.472069	0.0819061	-5.76354	8.23672e-09	1.23924e-06	Folr1
Gsn/ENSMUSG00000026879.10/protein_coding	123.352	-0.638408	0.110867	-5.75834	8.49431e-09	1.26628e-06	Gsn
Serpinb1a/ENSMUSG00000044734.11/protein_coding	18.0017	-0.393442	0.0689249	-5.70828	1.14124e-08	1.68582e-06	Serpinb1a
Sufu/ENSMUSG00000025231.12/protein_coding	630.217	0.266746	0.0468119	5.69824	1.21049e-08	1.772e-06	Sufu
Smarcc1/ENSMUSG00000032481.12/protein_coding	556.292	0.291695	0.0512312	5.6937	1.24315e-08	1.80357e-06	Smarcc1
Ccni/ENSMUSG00000063015.8/protein_coding	2751.93	0.311101	0.0546732	5.69019	1.26898e-08	1.82475e-06	Ccni
Camk1d/ENSMUSG00000039145.12/protein_coding	1418.68	0.336878	0.0593193	5.67907	1.35428e-08	1.90263e-06	Camk1d
Il2rb/ENSMUSG00000068227.4/protein_coding	11.8446	-0.526257	0.0927046	-5.67671	1.37312e-08	1.90263e-06	Il2rb
Ms4a6b/ENSMUSG00000024677.9/protein_coding	1362.76	-0.484311	0.0853263	-5.676	1.37884e-08	1.90263e-06	Ms4a6b
Sec61g/ENSMUSG00000078974.6/protein_coding	114.285	-0.564993	0.0995469	-5.67564	1.38169e-08	1.90263e-06	Sec61g
Tmem154/ENSMUSG00000056498.9/protein_coding	68.6891	-0.630183	0.110955	-5.67965	1.3497e-08	1.90263e-06	Tmem154
Slfn1/ENSMUSG00000078763.2/protein_coding	24.5711	-0.549681	0.0971223	-5.65968	1.51652e-08	2.07075e-06	Slfn1
Slfn4/ENSMUSG00000000204.11/protein_coding	33.333	-0.390741	0.0691698	-5.64901	1.61374e-08	2.18514e-06	Slfn4
Spint2/ENSMUSG00000074227.7/protein_coding	8.13605	-0.527842	0.0935424	-5.64281	1.67296e-08	2.24661e-06	Spint2
Egr1/ENSMUSG00000038418.7/protein_coding	1118.31	0.585955	0.103872	5.64112	1.68946e-08	2.25016e-06	Egr1
H2-Aa/ENSMUSG00000036594.10/protein_coding	767.25	-0.635903	0.112853	-5.63478	1.75287e-08	2.31564e-06	H2-Aa
Cep97/ENSMUSG00000022604.14/protein_coding	100.096	0.493009	0.0875692	5.62994	1.80274e-08	2.35543e-06	Cep97
Rasgrp4/ENSMUSG00000030589.11/protein_coding	70.4168	-0.582407	0.103464	-5.62906	1.81198e-08	2.35543e-06	Rasgrp4
9830107B12Rik/ENSMUSG00000073386.4/protein_coding	5.5697	-0.370856	0.0662054	-5.6016	2.12378e-08	2.73884e-06	9830107B12Rik
Acap1/ENSMUSG00000001588.8/protein_coding	12.4948	-0.47006	0.0839861	-5.59688	2.18245e-08	2.79233e-06	Acap1
Col8a2/ENSMUSG00000056174.8/protein_coding	4.55566	-0.423693	0.0758394	-5.58672	2.314e-08	2.93752e-06	Col8a2
I830127L07Rik/ENSMUSG00000102051.1/transcribed_unprocessed_pseudogene	16.3521	-0.400821	0.0718759	-5.57656	2.45314e-08	3.09001e-06	I830127L07Rik
Stk39/ENSMUSG00000027030.11/protein_coding	11.4047	-0.512151	0.0920633	-5.56303	2.65135e-08	3.31398e-06	Stk39
Smim20/ENSMUSG00000061461.8/protein_coding	299.59	-0.421975	0.07603	-5.55011	2.85495e-08	3.54123e-06	Smim20
Il7r/ENSMUSG00000003882.4/protein_coding	371.723	0.456815	0.0824217	5.54241	2.98337e-08	3.67248e-06	Il7r
H2-Ab1/ENSMUSG00000073421.5/protein_coding	1603.75	-0.627365	0.11332	-5.53625	3.09023e-08	3.76844e-06	H2-Ab1
Ly6c2/ENSMUSG00000022584.10/protein_coding	71.2969	-0.48617	0.0878315	-5.53526	3.10771e-08	3.76844e-06	Ly6c2
Trpm3/ENSMUSG00000052387.11/protein_coding	6.59225	-0.458072	0.0829577	-5.52176	3.35628e-08	4.03972e-06	Trpm3
Acsl3/ENSMUSG00000032883.11/protein_coding	67.9916	-0.537113	0.0974787	-5.51005	3.58727e-08	4.28599e-06	Acsl3
Slco1c1/ENSMUSG00000030235.13/protein_coding	6.95374	-0.444828	0.0807876	-5.50614	3.66787e-08	4.35031e-06	Slco1c1
Loxl3/ENSMUSG00000000693.6/protein_coding	278.708	-0.396124	0.0721038	-5.49381	3.93364e-08	4.63171e-06	Loxl3
Aldoc/ENSMUSG00000017390.11/protein_coding	22.7832	-0.587325	0.106954	-5.49139	3.98787e-08	4.66179e-06	Aldoc
Cxcr2/ENSMUSG00000026180.8/protein_coding	34.1948	-0.373869	0.0681593	-5.48523	4.12939e-08	4.79275e-06	Cxcr2
2900026A02Rik/ENSMUSG00000051339.8/protein_coding	96.5415	-0.594325	0.108417	-5.48184	4.20928e-08	4.85082e-06	2900026A02Rik
Ccl9/ENSMUSG00000019122.8/protein_coding	1708.45	-0.475258	0.0867521	-5.47834	4.29333e-08	4.91284e-06	Ccl9
Cd300a/ENSMUSG00000034652.8/protein_coding	2863.01	-0.374919	0.0685876	-5.46629	4.59563e-08	5.22199e-06	Cd300a
Lgals3/ENSMUSG00000050335.12/protein_coding	123.754	-0.614224	0.112453	-5.46207	4.7061e-08	5.31038e-06	Lgals3
Elovl7/ENSMUSG00000021696.8/protein_coding	3.96032	-0.417257	0.0764573	-5.45738	4.8321e-08	5.41495e-06	Elovl7
Immp1l/ENSMUSG00000042670.5/protein_coding	219.94	-0.464379	0.0852315	-5.44844	5.08139e-08	5.65531e-06	Immp1l
Gm26527/ENSMUSG00000097582.1/lincRNA	1193.3	0.441571	0.0810639	5.44719	5.11723e-08	5.65645e-06	Gm26527
Asprv1/ENSMUSG00000033508.6/protein_coding	5.17725	-0.363152	0.0666956	-5.44492	5.18276e-08	5.69018e-06	Asprv1
Nlrp12/ENSMUSG00000078817.3/protein_coding	6.41206	-0.367171	0.0675195	-5.43801	5.38801e-08	5.87582e-06	Nlrp12
Cd177/ENSMUSG00000052212.5/protein_coding	112.658	-0.360115	0.0662737	-5.43376	5.5178e-08	5.97725e-06	Cd177
Mmp14/ENSMUSG00000000957.8/protein_coding	598.026	0.381962	0.0705469	5.4143	6.15276e-08	6.62094e-06	Mmp14
Gapt/ENSMUSG00000046006.5/protein_coding	12.3762	-0.531455	0.0982034	-5.41178	6.24013e-08	6.67078e-06	Gapt
Clec10a/ENSMUSG00000000318.12/protein_coding	45.6366	-0.604654	0.112054	-5.39608	6.81126e-08	7.23374e-06	Clec10a
Ostc/ENSMUSG00000041084.7/protein_coding	914.66	-0.37289	0.0693443	-5.37737	7.55821e-08	7.97489e-06	Ostc
Neurl1a/ENSMUSG00000006435.11/protein_coding	619.742	0.373463	0.0694954	5.37392	7.70435e-08	8.07664e-06	Neurl1a
Slpi/ENSMUSG00000017002.10/protein_coding	33.3666	-0.35255	0.0657691	-5.36042	8.30306e-08	8.64849e-06	Slpi
Lilrb4/ENSMUSG00000062593.11/protein_coding	131.78	-0.537392	0.100279	-5.35898	8.36945e-08	8.66211e-06	Lilrb4
Cpne2/ENSMUSG00000034361.5/protein_coding	22.8917	-0.603796	0.112819	-5.35189	8.70394e-08	8.89499e-06	Cpne2
Lrrc3/ENSMUSG00000051652.4/protein_coding	4685.88	0.256857	0.0479905	5.35224	8.68705e-08	8.89499e-06	Lrrc3
Ddost/ENSMUSG00000028757.4/protein_coding	3297.83	-0.253278	0.0474076	-5.34255	9.16469e-08	9.30731e-06	Ddost
Pum2/ENSMUSG00000020594.10/protein_coding	404.541	0.359065	0.0672262	5.34116	9.23556e-08	9.32103e-06	Pum2
Ctsa/ENSMUSG00000017760.11/protein_coding	15145.2	-0.208607	0.0391275	-5.33146	9.74284e-08	9.7723e-06	Ctsa
Ninj1/ENSMUSG00000037966.11/protein_coding	861.583	-0.415388	0.0779545	-5.32859	9.89786e-08	9.86689e-06	Ninj1
Cbl/ENSMUSG00000034342.8/protein_coding	1089.82	0.361223	0.0680181	5.31069	1.09212e-07	1.06621e-05	Cbl
Cd79b/ENSMUSG00000040592.7/protein_coding	306.77	-0.357663	0.0673182	-5.31302	1.07822e-07	1.06621e-05	Cd79b
Gm4980/ENSMUSG00000096606.2/protein_coding	2002.66	0.21484	0.0404481	5.31151	1.08721e-07	1.06621e-05	Gm4980
Rab3d/ENSMUSG00000019066.9/protein_coding	73.1277	-0.574938	0.108273	-5.31007	1.09581e-07	1.06621e-05	Rab3d
Alox15/ENSMUSG00000018924.6/protein_coding	8.85385	-0.36994	0.069715	-5.30646	1.11773e-07	1.08107e-05	Alox15
Tmem204/ENSMUSG00000024168.7/protein_coding	752.382	-0.337164	0.0636981	-5.29316	1.2022e-07	1.15589e-05	Tmem204
Hdc/ENSMUSG00000027360.5/protein_coding	27.7065	-0.337388	0.0637619	-5.29136	1.21407e-07	1.16044e-05	Hdc
Col9a3/ENSMUSG00000027570.11/protein_coding	15.3373	-0.590004	0.111697	-5.28216	1.27671e-07	1.21317e-05	Col9a3
Slco4c1/ENSMUSG00000040693.7/protein_coding	3.79539	-0.343961	0.0651432	-5.28008	1.2913e-07	1.21991e-05	Slco4c1
Prnp/ENSMUSG00000079037.5/protein_coding	37.147	-0.567119	0.107856	-5.25813	1.45525e-07	1.36684e-05	Prnp
Mmp25/ENSMUSG00000023903.7/protein_coding	14.595	-0.517332	0.0985104	-5.25155	1.50825e-07	1.40848e-05	Mmp25
Ankrd22/ENSMUSG00000024774.11/protein_coding	2.81758	-0.342538	0.0652779	-5.24737	1.54282e-07	1.43253e-05	Ankrd22
Slc38a3/ENSMUSG00000010064.11/protein_coding	4.6037	-0.426045	0.081235	-5.2446	1.56622e-07	1.44599e-05	Slc38a3
Lyz2/ENSMUSG00000069516.7/protein_coding	8687.21	-0.587865	0.112199	-5.23948	1.6103e-07	1.47829e-05	Lyz2
Sorl1/ENSMUSG00000049313.8/protein_coding	802.277	-0.457306	0.0873682	-5.23423	1.65671e-07	1.51235e-05	Sorl1
Slc29a3/ENSMUSG00000020100.11/protein_coding	8972.99	0.243343	0.0465075	5.23234	1.67382e-07	1.51943e-05	Slc29a3
Ggta1/ENSMUSG00000035778.13/protein_coding	1269.11	-0.305192	0.0584687	-5.21976	1.79158e-07	1.59804e-05	Ggta1
Mgst2/ENSMUSG00000074604.5/protein_coding	8.01585	-0.488658	0.0936286	-5.21912	1.79779e-07	1.59804e-05	Mgst2
Rn7sk/ENSMUSG00000065037.1/misc_RNA	97.1633	-0.559086	0.107127	-5.21891	1.79975e-07	1.59804e-05	Rn7sk
Steap1/ENSMUSG00000015652.5/protein_coding	2.27853	-0.344163	0.0659256	-5.22047	1.78466e-07	1.59804e-05	Steap1
Slamf7/ENSMUSG00000038179.9/protein_coding	21.9004	-0.579944	0.111294	-5.21091	1.8792e-07	1.65952e-05	Slamf7
4930438A08Rik/ENSMUSG00000069873.3/protein_coding	4.47816	-0.37388	0.0719416	-5.19699	2.02541e-07	1.77896e-05	4930438A08Rik
Tmem50b/ENSMUSG00000022964.10/protein_coding	2241.39	0.238208	0.0458659	5.19357	2.06301e-07	1.80225e-05	Tmem50b
H2-Eb1/ENSMUSG00000060586.10/protein_coding	586.883	-0.587819	0.113275	-5.18933	2.11057e-07	1.83394e-05	H2-Eb1
Ndufb9/ENSMUSG00000022354.3/protein_coding	488.804	-0.377807	0.0729134	-5.18158	2.2001e-07	1.90156e-05	Ndufb9
Mapk13/ENSMUSG00000004864.8/protein_coding	4.60818	-0.344758	0.0665855	-5.17767	2.24678e-07	1.93164e-05	Mapk13
Ccdc86/ENSMUSG00000024732.7/protein_coding	363.981	0.363502	0.0704	5.16338	2.42525e-07	2.0741e-05	Ccdc86
Hps4/ENSMUSG00000042328.9/protein_coding	2790.91	0.217887	0.0422173	5.16107	2.45541e-07	2.08033e-05	Hps4
Spns2/ENSMUSG00000040447.11/protein_coding	665.713	0.401093	0.0777181	5.16086	2.45814e-07	2.08033e-05	Spns2
Flot2/ENSMUSG00000061981.10/protein_coding	194.214	-0.441032	0.085573	-5.15387	2.55161e-07	2.1464e-05	Flot2
Pfkp/ENSMUSG00000021196.9/protein_coding	39.4687	-0.58378	0.113288	-5.15307	2.56263e-07	2.1464e-05	Pfkp
Zmat1/ENSMUSG00000052676.12/protein_coding	151.833	-0.40965	0.0795813	-5.14757	2.63883e-07	2.19889e-05	Zmat1
Cd86/ENSMUSG00000022901.9/protein_coding	4755.93	-0.325219	0.0632375	-5.14281	2.70653e-07	2.24379e-05	Cd86
Cd209a/ENSMUSG00000031494.6/protein_coding	108.213	-0.559739	0.109205	-5.12559	2.966e-07	2.44642e-05	Cd209a
Crip1/ENSMUSG00000006360.7/protein_coding	55.0506	-0.579632	0.113327	-5.1147	3.14245e-07	2.57887e-05	Crip1
Htr2c/ENSMUSG00000041380.9/protein_coding	2.44438	-0.346226	0.0678018	-5.10644	3.28284e-07	2.68055e-05	Htr2c
Dbi/ENSMUSG00000026385.12/protein_coding	235.907	-0.34838	0.068281	-5.10215	3.35813e-07	2.72831e-05	Dbi
H2-DMa/ENSMUSG00000037649.9/protein_coding	1922.63	0.34944	0.0685736	5.09584	3.47207e-07	2.80685e-05	H2-DMa
Hist1h4c/ENSMUSG00000060678.4/protein_coding	33.7593	-0.57625	0.11331	-5.0856	3.66466e-07	2.93335e-05	Hist1h4c
Slc2a12/ENSMUSG00000037490.5/protein_coding	6.55782	-0.392336	0.0771375	-5.08618	3.65339e-07	2.93335e-05	Slc2a12
Hivep1/ENSMUSG00000021366.7/protein_coding	139.53	0.486458	0.095713	5.08246	3.72569e-07	2.96759e-05	Hivep1
Prkcd/ENSMUSG00000021948.11/protein_coding	5968.72	0.218101	0.0429241	5.08109	3.75278e-07	2.97458e-05	Prkcd
Phyhd1/ENSMUSG00000079484.8/protein_coding	3303.05	-0.342498	0.0674415	-5.07845	3.80531e-07	3.00158e-05	Phyhd1
Anxa2/ENSMUSG00000032231.10/protein_coding	124.83	-0.514963	0.101497	-5.07368	3.902e-07	3.05519e-05	Anxa2
Aqp1/ENSMUSG00000004655.5/protein_coding	3.09797	-0.346345	0.068269	-5.07325	3.91088e-07	3.05519e-05	Aqp1
Churc1/ENSMUSG00000090258.3/protein_coding	218.233	-0.468604	0.092401	-5.07141	3.94873e-07	3.07e-05	Churc1
Zswim6/ENSMUSG00000032846.9/protein_coding	352.071	0.421195	0.0831121	5.06779	4.02456e-07	3.11405e-05	Zswim6
Prelp/ENSMUSG00000041577.5/protein_coding	3.08288	-0.392504	0.0775529	-5.06111	4.16816e-07	3.20988e-05	Prelp
Sema3b/ENSMUSG00000057969.11/protein_coding	3.54629	-0.370548	0.0732981	-5.05536	4.2958e-07	3.29257e-05	Sema3b
Gm15964/ENSMUSG00000085337.1/processed_transcript	52.143	0.513604	0.101725	5.04895	4.44236e-07	3.38892e-05	Gm15964
Pxylp1/ENSMUSG00000043587.11/protein_coding	4.76381	-0.422181	0.0839523	-5.02882	4.93509e-07	3.74721e-05	Pxylp1
Serpinf1/ENSMUSG00000000753.11/protein_coding	613.085	0.396579	0.078995	5.02031	5.15883e-07	3.89888e-05	Serpinf1
Slc2a3/ENSMUSG00000003153.6/protein_coding	103.162	-0.558696	0.111574	-5.0074	5.51692e-07	4.15021e-05	Slc2a3
Rhou/ENSMUSG00000039960.5/protein_coding	4.51491	-0.344042	0.0688742	-4.99523	5.87664e-07	4.40044e-05	Rhou
Psat1/ENSMUSG00000024640.5/protein_coding	170.531	-0.394673	0.0791157	-4.98855	6.08336e-07	4.53434e-05	Psat1
Mgst1/ENSMUSG00000008540.7/protein_coding	37.2327	-0.400596	0.0803542	-4.98538	6.18403e-07	4.58832e-05	Mgst1
Tbc1d10c/ENSMUSG00000040247.5/protein_coding	30.6735	-0.563524	0.113233	-4.97669	6.46795e-07	4.77717e-05	Tbc1d10c
Trem3/ENSMUSG00000041754.5/protein_coding	21.1116	-0.45315	0.0911836	-4.96965	6.70748e-07	4.93166e-05	Trem3
Abhd6/ENSMUSG00000025277.9/protein_coding	573.612	-0.261491	0.0527401	-4.9581	7.11866e-07	5.21041e-05	Abhd6
Chst2/ENSMUSG00000033350.7/protein_coding	58.9937	0.502727	0.101614	4.9474	7.52121e-07	5.47849e-05	Chst2
P2ry6/ENSMUSG00000048779.4/protein_coding	3529.53	0.242451	0.0490138	4.94659	7.55235e-07	5.47849e-05	P2ry6
Aoah/ENSMUSG00000021322.7/protein_coding	32.496	-0.558776	0.113187	-4.93677	7.94282e-07	5.69258e-05	Aoah
Hp/ENSMUSG00000031722.9/protein_coding	86.3686	-0.37607	0.076181	-4.93653	7.95258e-07	5.69258e-05	Hp
Src/ENSMUSG00000027646.11/protein_coding	321.577	0.463089	0.0937927	4.93737	7.91837e-07	5.69258e-05	Src
Cib1/ENSMUSG00000030538.11/protein_coding	446.221	-0.270464	0.0548282	-4.93294	8.09999e-07	5.77267e-05	Cib1
Pla2g16/ENSMUSG00000060675.9/protein_coding	79.6749	-0.464546	0.0942082	-4.93106	8.17848e-07	5.80315e-05	Pla2g16
Rgs18/ENSMUSG00000026357.3/protein_coding	20.4104	-0.538161	0.109368	-4.92066	8.6252e-07	6.09351e-05	Rgs18
Adamts1/ENSMUSG00000022893.10/protein_coding	170.379	0.533197	0.108452	4.91644	8.81332e-07	6.19946e-05	Adamts1
Rbp1/ENSMUSG00000046402.10/protein_coding	4.21056	-0.346514	0.0705514	-4.91151	9.03799e-07	6.3301e-05	Rbp1
C3/ENSMUSG00000024164.11/protein_coding	85.9515	-0.477504	0.0973412	-4.90547	9.32046e-07	6.49992e-05	C3
Iqgap2/ENSMUSG00000021676.9/protein_coding	26.6617	-0.550362	0.112252	-4.90293	9.44166e-07	6.5563e-05	Iqgap2
Atp1a2/ENSMUSG00000007097.10/protein_coding	12.2744	-0.525555	0.107429	-4.89213	9.9749e-07	6.89387e-05	Atp1a2
Cyba/ENSMUSG00000006519.10/protein_coding	3811.12	-0.361818	0.0739704	-4.89139	1.00126e-06	6.89387e-05	Cyba
Mapkapk3/ENSMUSG00000032577.12/protein_coding	435.149	-0.288658	0.0590692	-4.88677	1.02503e-06	7.02771e-05	Mapkapk3
Elane/ENSMUSG00000020125.6/protein_coding	2.68422	-0.290082	0.0593908	-4.8843	1.03798e-06	7.08661e-05	Elane
Itih5/ENSMUSG00000025780.7/protein_coding	2.43228	-0.296557	0.0607353	-4.88277	1.04605e-06	7.11181e-05	Itih5
Clic6/ENSMUSG00000022949.5/protein_coding	18.1552	-0.332619	0.068278	-4.87154	1.10733e-06	7.49712e-05	Clic6
Setd3/ENSMUSG00000056770.11/protein_coding	1023.82	0.330776	0.0679169	4.87031	1.11422e-06	7.51241e-05	Setd3
Adpgk/ENSMUSG00000025236.10/protein_coding	363.165	-0.365398	0.0750859	-4.8664	1.1365e-06	7.63099e-05	Adpgk
Ehmt2/ENSMUSG00000013787.11/protein_coding	480.791	0.332852	0.0685087	4.85853	1.18259e-06	7.84325e-05	Ehmt2
Nkg7/ENSMUSG00000004612.8/protein_coding	12.1399	-0.415152	0.0854267	-4.85974	1.17538e-06	7.84325e-05	Nkg7
Plaur/ENSMUSG00000046223.9/protein_coding	125.652	-0.503745	0.103677	-4.85879	1.18104e-06	7.84325e-05	Plaur
Arhgap31/ENSMUSG00000022799.4/protein_coding	1445.75	0.344202	0.0709079	4.85421	1.20866e-06	7.98357e-05	Arhgap31
Glipr2/ENSMUSG00000028480.10/protein_coding	27.7193	-0.411561	0.0851421	-4.83381	1.33944e-06	8.81155e-05	Glipr2
Acpp/ENSMUSG00000032561.10/protein_coding	3.81694	-0.296792	0.0614276	-4.83158	1.35455e-06	8.87505e-05	Acpp
Klf2/ENSMUSG00000055148.7/protein_coding	237.335	0.533851	0.110568	4.82827	1.37724e-06	8.98747e-05	Klf2
Hmgb2/ENSMUSG00000054717.6/protein_coding	273.772	-0.35539	0.0736249	-4.82704	1.38577e-06	9.00696e-05	Hmgb2
Gm26714/ENSMUSG00000097654.1/lincRNA	27.9319	0.545876	0.113197	4.82237	1.41863e-06	9.18376e-05	Gm26714
Gnas/ENSMUSG00000027523.15/protein_coding	4030.71	0.229559	0.04765	4.81761	1.45291e-06	9.3684e-05	Gnas
2610035D17Rik/ENSMUSG00000087259.3/lincRNA	124.615	-0.534683	0.111034	-4.81551	1.46827e-06	9.43001e-05	2610035D17Rik
Padi4/ENSMUSG00000025330.6/protein_coding	20.5706	-0.293454	0.0609611	-4.81379	1.48094e-06	9.44215e-05	Padi4
S100a4/ENSMUSG00000001020.7/protein_coding	27.4234	-0.529698	0.11004	-4.81368	1.48178e-06	9.44215e-05	S100a4
Ndufv2/ENSMUSG00000024099.10/protein_coding	579.323	-0.302533	0.0628874	-4.81071	1.50398e-06	9.54614e-05	Ndufv2
Scaf8/ENSMUSG00000046201.8/protein_coding	627.037	0.307871	0.0640934	4.80347	1.5594e-06	9.85942e-05	Scaf8
Ppt1/ENSMUSG00000028657.10/protein_coding	4808.92	-0.190245	0.0396479	-4.79836	1.59968e-06	0.000100749	Ppt1
Itgb2l/ENSMUSG00000000157.11/protein_coding	24.0718	-0.276448	0.0576243	-4.79741	1.60728e-06	0.000100836	Itgb2l
Slc29a4/ENSMUSG00000050822.7/protein_coding	5.83948	-0.352875	0.0736662	-4.79019	1.6662e-06	0.000104131	Slc29a4
Gca/ENSMUSG00000026893.4/protein_coding	68.2852	-0.472444	0.0987731	-4.78312	1.72596e-06	0.000107453	Gca
Col8a1/ENSMUSG00000068196.4/protein_coding	2.9084	-0.34595	0.0724439	-4.77542	1.79332e-06	0.00011122	Col8a1
Trem1/ENSMUSG00000042265.9/protein_coding	14.159	-0.378275	0.0792846	-4.7711	1.83221e-06	0.0001132	Trem1
Ifnlr1/ENSMUSG00000062157.6/protein_coding	2.06191	-0.286985	0.0601613	-4.77026	1.83986e-06	0.000113242	Ifnlr1
Arl1/ENSMUSG00000060904.10/protein_coding	1538.24	-0.358849	0.0752426	-4.76923	1.84936e-06	0.000113397	Arl1
Npnt/ENSMUSG00000040998.14/protein_coding	999.618	0.394765	0.0828328	4.76581	1.88094e-06	0.0001149	Npnt
Ssh2/ENSMUSG00000037926.11/protein_coding	10394.5	0.259604	0.0545057	4.76287	1.9086e-06	0.000116153	Ssh2
Olfm1/ENSMUSG00000026833.14/protein_coding	30.6295	-0.529807	0.11126	-4.76188	1.91801e-06	0.00011629	Olfm1
Mndal/ENSMUSG00000090272.3/protein_coding	22.2474	-0.538418	0.113232	-4.75499	1.98459e-06	0.000119879	Mndal
Ceacam10/ENSMUSG00000054169.6/protein_coding	3.95698	-0.289506	0.0609034	-4.75353	1.99891e-06	0.000120297	Ceacam10
Slc13a4/ENSMUSG00000029843.4/protein_coding	5.24411	-0.371518	0.0782651	-4.74693	2.06531e-06	0.000123835	Slc13a4
Ccr2/ENSMUSG00000049103.9/protein_coding	288.429	-0.537685	0.113306	-4.74544	2.08056e-06	0.000124291	Ccr2
Il1rn/ENSMUSG00000026981.11/protein_coding	20.7989	-0.501534	0.105817	-4.73965	2.14089e-06	0.000127426	Il1rn
Col27a1/ENSMUSG00000045672.11/protein_coding	1123.47	0.356809	0.0753501	4.73534	2.18687e-06	0.000129688	Col27a1
Fam101b/ENSMUSG00000020846.6/protein_coding	11.7381	-0.289677	0.0612158	-4.73206	2.22247e-06	0.00013132	Fam101b
Ndufb8/ENSMUSG00000025204.6/protein_coding	783.508	-0.434132	0.0919332	-4.72226	2.33242e-06	0.000137317	Ndufb8
2210018M11Rik/ENSMUSG00000035401.8/protein_coding	270.718	0.35621	0.0754972	4.71819	2.3795e-06	0.000139583	2210018M11Rik
Atp7a/ENSMUSG00000033792.8/protein_coding	1142.95	0.248602	0.0528118	4.70731	2.51005e-06	0.000146712	Atp7a
Lrg1/ENSMUSG00000037095.7/protein_coding	13.2	-0.269527	0.0573269	-4.70158	2.58157e-06	0.000150351	Lrg1
Gpr97/ENSMUSG00000060470.6/protein_coding	4.40771	-0.275107	0.0585691	-4.69713	2.63838e-06	0.000153111	Gpr97
AA467197/ENSMUSG00000033213.12/protein_coding	3.26855	-0.32586	0.0694027	-4.69521	2.66337e-06	0.000154011	AA467197
Cebpe/ENSMUSG00000052435.6/protein_coding	3.44112	-0.296379	0.0632086	-4.6889	2.74674e-06	0.000158269	Cebpe
Arg2/ENSMUSG00000021125.6/protein_coding	5.55417	-0.356609	0.0760875	-4.68683	2.77472e-06	0.000159316	Arg2
Ezr/ENSMUSG00000052397.8/protein_coding	87.618	-0.486906	0.10404	-4.67999	2.8689e-06	0.000164143	Ezr
2010002M12Rik/ENSMUSG00000067297.4/protein_coding	2.96471	-0.295759	0.0632736	-4.67429	2.94968e-06	0.000168173	2010002M12Rik
Gm3252/ENSMUSG00000094628.3/protein_coding	114.049	-0.459866	0.0984993	-4.66872	3.03078e-06	0.000171202	Gm3252
Igf2/ENSMUSG00000048583.12/protein_coding	5.3161	-0.372455	0.0797808	-4.66848	3.03441e-06	0.000171202	Igf2
Nsmce1/ENSMUSG00000030750.9/protein_coding	292.546	-0.364966	0.0781666	-4.66908	3.02552e-06	0.000171202	Nsmce1
Mrpl17/ENSMUSG00000030879.9/protein_coding	526.144	-0.342062	0.0732893	-4.66728	3.05215e-06	0.000171429	Mrpl17
Tcf4/ENSMUSG00000053477.11/protein_coding	1165.64	0.272123	0.0583106	4.66678	3.05954e-06	0.000171429	Tcf4
A530064D06Rik/ENSMUSG00000043939.10/protein_coding	13.4989	-0.417602	0.0895425	-4.66374	3.10521e-06	0.00017339	A530064D06Rik
Cadm1/ENSMUSG00000032076.14/protein_coding	1800.16	0.265605	0.0569865	4.66084	3.14923e-06	0.000175246	Cadm1
Ggh/ENSMUSG00000073987.4/protein_coding	527.343	-0.320554	0.068824	-4.6576	3.19925e-06	0.000177422	Ggh
Cd24a/ENSMUSG00000047139.8/protein_coding	19.0162	-0.27706	0.059506	-4.656	3.22413e-06	0.00017776	Cd24a
Phgdh/ENSMUSG00000053398.7/protein_coding	1442.36	-0.288773	0.0620244	-4.6558	3.22722e-06	0.00017776	Phgdh
Cd81/ENSMUSG00000037706.12/protein_coding	26811.8	0.206444	0.0443794	4.65181	3.29036e-06	0.000180625	Cd81
Calml4/ENSMUSG00000032246.9/protein_coding	4.00419	-0.350207	0.0754094	-4.64408	3.41599e-06	0.00018689	Calml4
Ms4a7/ENSMUSG00000024672.7/protein_coding	85.9299	-0.522162	0.1125	-4.64143	3.46e-06	0.000188663	Ms4a7
Hist1h2be/ENSMUSG00000047246.6/protein_coding	221.686	-0.440219	0.0949141	-4.63807	3.51674e-06	0.000191116	Hist1h2be
Ppp1r12a/ENSMUSG00000019907.9/protein_coding	296.262	0.328756	0.0711403	4.62124	3.81453e-06	0.000206608	Ppp1r12a
Slc9a1/ENSMUSG00000028854.9/protein_coding	566.716	0.300299	0.0650845	4.61398	3.95026e-06	0.000213249	Slc9a1
Ms4a6c/ENSMUSG00000079419.4/protein_coding	351.199	-0.371942	0.0808116	-4.60258	4.17286e-06	0.000224519	Ms4a6c
Vcl/ENSMUSG00000021823.9/protein_coding	133.864	-0.438217	0.0952347	-4.60144	4.19577e-06	0.000225007	Vcl
Gpr180/ENSMUSG00000022131.2/protein_coding	406.177	-0.265955	0.057873	-4.5955	4.31711e-06	0.000230752	Gpr180
Athl1/ENSMUSG00000062031.8/protein_coding	64.4189	-0.492373	0.107316	-4.58808	4.47334e-06	0.000238319	Athl1
Cachd1/ENSMUSG00000028532.10/protein_coding	2.47555	-0.275925	0.0601539	-4.58698	4.49703e-06	0.000238798	Cachd1
Rps14/ENSMUSG00000024608.6/protein_coding	723.74	-0.39625	0.0864004	-4.58621	4.51368e-06	0.000238901	Rps14
Tnfsf13b/ENSMUSG00000031497.8/protein_coding	95.0075	0.462968	0.101087	4.57987	4.65255e-06	0.000245452	Tnfsf13b
Ebi3/ENSMUSG00000003206.6/protein_coding	319.197	-0.345344	0.0754631	-4.57633	4.73194e-06	0.00024803	Ebi3
Lamtor5/ENSMUSG00000087260.1/protein_coding	514.768	-0.285966	0.0624828	-4.57671	4.72346e-06	0.00024803	Lamtor5
Diap2/ENSMUSG00000034480.14/protein_coding	1080.03	0.258111	0.0564252	4.57439	4.77619e-06	0.000248745	Diap2
Prr32/ENSMUSG00000037086.3/protein_coding	2.80246	-0.302361	0.0660907	-4.57494	4.7635e-06	0.000248745	Prr32
Sar1b/ENSMUSG00000020386.5/protein_coding	910.883	-0.345939	0.0756439	-4.57326	4.80201e-06	0.00024929	Sar1b
Cd302/ENSMUSG00000060703.8/protein_coding	1127.24	-0.302396	0.0661608	-4.57062	4.86275e-06	0.000250047	Cd302
Hopx/ENSMUSG00000059325.10/protein_coding	9.40236	-0.413861	0.090522	-4.57194	4.83233e-06	0.000250047	Hopx
Mvb12b/ENSMUSG00000038740.5/protein_coding	456.845	0.34836	0.0762111	4.57098	4.85447e-06	0.000250047	Mvb12b
Gm3164/ENSMUSG00000091418.2/protein_coding	113.04	-0.477692	0.104547	-4.56915	4.8971e-06	0.000251019	Gm3164
Otx2/ENSMUSG00000021848.11/protein_coding	3.2442	-0.344159	0.0753505	-4.56744	4.93726e-06	0.000252281	Otx2
AI314180/ENSMUSG00000050812.14/protein_coding	827.12	0.227013	0.0497384	4.56414	5.01538e-06	0.000254672	AI314180
Tmem71/ENSMUSG00000036944.5/protein_coding	122.278	-0.403867	0.0884846	-4.56426	5.01264e-06	0.000254672	Tmem71
Hira/ENSMUSG00000022702.11/protein_coding	81.1452	0.444929	0.097512	4.56281	5.04738e-06	0.000255498	Hira
Rps6ka3/ENSMUSG00000031309.11/protein_coding	143.711	0.459981	0.100952	4.55644	5.20275e-06	0.000262545	Rps6ka3
Ago2/ENSMUSG00000036698.10/protein_coding	366.753	0.389057	0.0854176	4.55477	5.24428e-06	0.000263498	Ago2
H2afv/ENSMUSG00000041126.12/protein_coding	261.417	-0.30174	0.0662527	-4.55438	5.25408e-06	0.000263498	H2afv
Arsb/ENSMUSG00000042082.6/protein_coding	5147.92	0.357175	0.0785035	4.5498	5.36962e-06	0.000267826	Arsb
Ndrg1/ENSMUSG00000005125.8/protein_coding	10.9474	-0.394765	0.0867805	-4.54901	5.38981e-06	0.000267826	Ndrg1
Pcp4l1/ENSMUSG00000038370.6/protein_coding	6.88412	-0.357667	0.0786216	-4.54923	5.38438e-06	0.000267826	Pcp4l1
Xcr1/ENSMUSG00000060509.4/protein_coding	13.3061	0.492859	0.108444	4.54481	5.49841e-06	0.000272389	Xcr1
Gm14548/ENSMUSG00000074417.9/protein_coding	14.4542	-0.385142	0.0847861	-4.54252	5.55869e-06	0.000274538	Gm14548
Serpinh1/ENSMUSG00000070436.7/protein_coding	1.9528	-0.283158	0.0623934	-4.53826	5.67205e-06	0.000279288	Serpinh1
Nfatc1/ENSMUSG00000033016.11/protein_coding	2624.18	0.202302	0.0445854	4.53741	5.695e-06	0.000279571	Nfatc1
Rnf7/ENSMUSG00000051234.6/protein_coding	779.129	-0.283859	0.0626193	-4.53309	5.81272e-06	0.000284491	Rnf7
Gpx4/ENSMUSG00000075706.6/protein_coding	903.507	-0.40763	0.0900235	-4.52805	5.95319e-06	0.00029049	Gpx4
Bmx/ENSMUSG00000031377.7/protein_coding	5.18371	-0.333994	0.0738329	-4.52365	6.07823e-06	0.000295704	Bmx
Capn3/ENSMUSG00000079110.7/protein_coding	2274.28	0.159064	0.0352445	4.51316	6.38692e-06	0.000308416	Capn3
Fam210a/ENSMUSG00000038121.6/protein_coding	441.548	0.337639	0.0748173	4.51284	6.39647e-06	0.000308416	Fam210a
Myc/ENSMUSG00000022346.10/protein_coding	353.728	0.463336	0.102659	4.51333	6.3817e-06	0.000308416	Myc
Akap13/ENSMUSG00000066406.10/protein_coding	2768.15	0.223067	0.0494508	4.5109	6.45543e-06	0.000308513	Akap13
Fth1/ENSMUSG00000024661.6/protein_coding	8791.3	0.196217	0.0434898	4.5118	6.42809e-06	0.000308513	Fth1
Pbxip1/ENSMUSG00000042613.5/protein_coding	1623.18	0.283216	0.0627773	4.51144	6.439e-06	0.000308513	Pbxip1
Ago4/ENSMUSG00000042500.11/protein_coding	182.039	0.364908	0.0809449	4.50811	6.54087e-06	0.000311679	Ago4
Tmem9/ENSMUSG00000026411.13/protein_coding	277.784	-0.368727	0.081805	-4.50739	6.56307e-06	0.000311823	Tmem9
Ier3/ENSMUSG00000003541.6/protein_coding	222.962	0.489271	0.108631	4.50395	6.6702e-06	0.000315988	Ier3
Fpr2/ENSMUSG00000052270.7/protein_coding	7.06215	-0.342652	0.0761025	-4.50251	6.71571e-06	0.0003163	Fpr2
Uqcrh/ENSMUSG00000063882.8/protein_coding	244.613	-0.422554	0.0938399	-4.50293	6.70242e-06	0.0003163	Uqcrh
Atp5e/ENSMUSG00000016252.7/protein_coding	232.614	-0.427579	0.0949987	-4.50089	6.76687e-06	0.000317788	Atp5e
Plekha1/ENSMUSG00000040268.12/protein_coding	1100.71	0.230374	0.0512173	4.49798	6.86034e-06	0.00032125	Plekha1
Plxnc1/ENSMUSG00000074785.4/protein_coding	33.0744	-0.506274	0.112573	-4.49731	6.8819e-06	0.000321333	Plxnc1
AF251705/ENSMUSG00000044811.9/protein_coding	3528	-0.275113	0.0612112	-4.49448	6.9739e-06	0.000323024	AF251705
Ranbp3/ENSMUSG00000002372.8/protein_coding	753.224	0.212913	0.0473712	4.49457	6.97119e-06	0.000323024	Ranbp3
Tom1l1/ENSMUSG00000020541.8/protein_coding	412.83	-0.271078	0.0603151	-4.49437	6.97775e-06	0.000323024	Tom1l1
Ncr1/ENSMUSG00000062524.3/protein_coding	4.40464	-0.26761	0.0595617	-4.49299	7.02302e-06	0.000323728	Ncr1
Pla2g7/ENSMUSG00000023913.13/protein_coding	118.691	-0.507552	0.112973	-4.49269	7.0328e-06	0.000323728	Pla2g7
Prlr/ENSMUSG00000005268.16/protein_coding	4.74431	-0.336446	0.0750074	-4.48551	7.27409e-06	0.000333889	Prlr
Cd74/ENSMUSG00000024610.10/protein_coding	3264.64	-0.502282	0.112037	-4.48319	7.35351e-06	0.000334221	Cd74
Fxyd1/ENSMUSG00000036570.10/protein_coding	2.33204	-0.279952	0.0624498	-4.48282	7.3662e-06	0.000334221	Fxyd1
Syne1/ENSMUSG00000096054.2/protein_coding	10.2341	-0.26923	0.0600485	-4.48354	7.34153e-06	0.000334221	Syne1
Tinagl1/ENSMUSG00000028776.10/protein_coding	5.64569	-0.40017	0.0892765	-4.48236	7.38218e-06	0.000334221	Tinagl1
Zfp110/ENSMUSG00000058638.9/protein_coding	931.214	-0.197358	0.0440306	-4.4823	7.38416e-06	0.000334221	Zfp110
Cd101/ENSMUSG00000086564.5/protein_coding	129.454	-0.414042	0.0924237	-4.47982	7.47059e-06	0.000337194	Cd101
Igfbp4/ENSMUSG00000017493.8/protein_coding	446.031	0.379562	0.0847602	4.47807	7.53208e-06	0.000339027	Igfbp4
Uqcc2/ENSMUSG00000024208.11/protein_coding	156.651	-0.426828	0.0954055	-4.47383	7.68302e-06	0.000344866	Uqcc2
Bmpr2/ENSMUSG00000067336.6/protein_coding	363.082	0.443653	0.0992205	4.47139	7.77146e-06	0.000346919	Bmpr2
Chd4/ENSMUSG00000063870.8/protein_coding	446.061	0.34049	0.0761465	4.47152	7.76668e-06	0.000346919	Chd4
Gpc1/ENSMUSG00000034220.7/protein_coding	7.6233	-0.379415	0.0848993	-4.469	7.85858e-06	0.000349847	Gpc1
Ube2r2/ENSMUSG00000036241.3/protein_coding	497.226	0.24694	0.055333	4.46279	8.08989e-06	0.00035916	Ube2r2
Dnajc15/ENSMUSG00000022013.3/protein_coding	148.459	-0.451779	0.101302	-4.45975	8.2057e-06	0.000363309	Dnajc15
Pts/ENSMUSG00000032067.5/protein_coding	492.287	-0.34072	0.0764291	-4.45799	8.27318e-06	0.000365301	Pts
Ssr4/ENSMUSG00000002014.8/protein_coding	1336.49	-0.251883	0.0565714	-4.45248	8.48831e-06	0.000373785	Ssr4
Slc40a1/ENSMUSG00000025993.6/protein_coding	4593.1	-0.246972	0.0555821	-4.44337	8.85625e-06	0.000388933	Slc40a1
Mmp8/ENSMUSG00000005800.2/protein_coding	163.492	-0.245421	0.0552472	-4.44224	8.90288e-06	0.000389927	Mmp8
Drc7/ENSMUSG00000031786.6/protein_coding	5.34876	-0.304202	0.0685035	-4.44069	8.96728e-06	0.000390641	Drc7
Mxd1/ENSMUSG00000001156.7/protein_coding	408.634	-0.440863	0.0992664	-4.44121	8.94537e-06	0.000390641	Mxd1
Sgsm2/ENSMUSG00000038351.10/protein_coding	88.6318	0.425435	0.0959309	4.4348	9.21568e-06	0.000400389	Sgsm2
Fcrl1/ENSMUSG00000059994.6/protein_coding	725.462	-0.368894	0.0832288	-4.4323	9.32352e-06	0.000403994	Fcrl1
Nuak1/ENSMUSG00000020032.10/protein_coding	305.81	0.437465	0.0987433	4.43033	9.40896e-06	0.000406612	Nuak1
Gm3005/ENSMUSG00000095195.3/protein_coding	52.6659	-0.498223	0.112565	-4.4261	9.59509e-06	0.000413556	Gm3005
Sppl3/ENSMUSG00000029550.8/protein_coding	1840.3	0.239187	0.0540493	4.42534	9.62904e-06	0.000413921	Sppl3
Herc2/ENSMUSG00000030451.11/protein_coding	2141.27	0.299303	0.0677679	4.41659	1.00268e-05	0.00042937	Herc2
Hpcal1/ENSMUSG00000071379.1/protein_coding	121.191	0.399882	0.0905471	4.41628	1.00413e-05	0.00042937	Hpcal1
Sptbn1/ENSMUSG00000020315.14/protein_coding	126.516	-0.432743	0.0980133	-4.41515	1.00941e-05	0.000430497	Sptbn1
Gm10221/ENSMUSG00000067719.4/protein_coding	227.973	-0.376048	0.0852669	-4.41024	1.03255e-05	0.000439212	Gm10221
F730016J06Rik/ENSMUSG00000086425.3/lincRNA	1.85456	-0.242837	0.0550884	-4.40813	1.04266e-05	0.000442354	F730016J06Rik
Endod1/ENSMUSG00000037419.8/protein_coding	1536.94	0.259773	0.0589471	4.40689	1.04864e-05	0.000443735	Endod1
Luzp1/ENSMUSG00000001089.10/protein_coding	244.551	0.361717	0.0820948	4.40608	1.05256e-05	0.000444235	Luzp1
Zfp467/ENSMUSG00000068551.8/protein_coding	632.514	0.287997	0.065383	4.40476	1.05899e-05	0.00044579	Zfp467
Hist1h1d/ENSMUSG00000052565.6/protein_coding	20.0324	-0.493878	0.112177	-4.40266	1.06933e-05	0.000448979	Hist1h1d
Car14/ENSMUSG00000038526.10/protein_coding	3.35601	-0.304908	0.0692644	-4.40209	1.07213e-05	0.000448997	Car14
Rnf144a/ENSMUSG00000020642.8/protein_coding	12.4336	-0.366541	0.0834163	-4.39412	1.11224e-05	0.000464594	Rnf144a
Ep300/ENSMUSG00000055024.8/protein_coding	1791.32	0.330408	0.0752858	4.38871	1.14026e-05	0.000475079	Ep300
Palm/ENSMUSG00000035863.9/protein_coding	24.7057	-0.493498	0.112468	-4.38788	1.1446e-05	0.000475669	Palm
Creb5/ENSMUSG00000053007.6/protein_coding	42.79	-0.483488	0.110272	-4.38449	1.16256e-05	0.000480674	Creb5
Cyb561/ENSMUSG00000019590.12/protein_coding	5.23336	-0.310883	0.070897	-4.38499	1.15989e-05	0.000480674	Cyb561
Gm4951/ENSMUSG00000073555.1/protein_coding	27.4307	-0.495317	0.112998	-4.38342	1.16832e-05	0.000481827	Gm4951
Uqcr10/ENSMUSG00000059534.8/protein_coding	257.907	-0.349694	0.0799948	-4.37146	1.23421e-05	0.000507714	Uqcr10
Ppp1r9b/ENSMUSG00000038976.8/protein_coding	294.069	0.376281	0.0860992	4.37033	1.24061e-05	0.000509058	Ppp1r9b
Il1r2/ENSMUSG00000026073.9/protein_coding	11.4389	-0.338669	0.0775116	-4.36927	1.24663e-05	0.00051024	Il1r2
Klrk1/ENSMUSG00000030149.11/protein_coding	13.4055	-0.436317	0.0999072	-4.36723	1.25835e-05	0.000513741	Klrk1
Tnfrsf11a/ENSMUSG00000026321.7/protein_coding	2030.88	0.227179	0.0520762	4.36243	1.28627e-05	0.000523823	Tnfrsf11a
Lrrk2/ENSMUSG00000036273.11/protein_coding	17.9161	-0.375757	0.0862046	-4.3589	1.30721e-05	0.000530614	Lrrk2
Tmem8/ENSMUSG00000024180.9/protein_coding	40.2331	-0.491925	0.112865	-4.35852	1.30947e-05	0.000530614	Tmem8
Hnmt/ENSMUSG00000026986.10/protein_coding	655.646	-0.324036	0.0743725	-4.35694	1.31895e-05	0.000533124	Hnmt
Cttn/ENSMUSG00000031078.11/protein_coding	3.70362	-0.337995	0.0775901	-4.35616	1.32363e-05	0.000533689	Cttn
Ctage5/ENSMUSG00000021000.11/protein_coding	984.914	0.227345	0.0522035	4.35496	1.33088e-05	0.000535285	Ctage5
Cnpy2/ENSMUSG00000025381.2/protein_coding	727.716	-0.314777	0.0723424	-4.35121	1.35386e-05	0.0005419	Cnpy2
Hspb8/ENSMUSG00000041548.4/protein_coding	2.18812	-0.271605	0.0624209	-4.35119	1.354e-05	0.0005419	Hspb8
Fyco1/ENSMUSG00000025241.11/protein_coding	721.179	0.279112	0.0641665	4.3498	1.36262e-05	0.000544008	Fyco1
Tmem63a/ENSMUSG00000026519.12/protein_coding	3214.68	0.224926	0.0517535	4.3461	1.38579e-05	0.000551905	Tmem63a
Camp/ENSMUSG00000038357.9/protein_coding	235.162	-0.230743	0.0531048	-4.34505	1.39244e-05	0.000553198	Camp
Steap2/ENSMUSG00000015653.9/protein_coding	1.91375	-0.254707	0.0586328	-4.3441	1.39849e-05	0.000554245	Steap2
Hist4h4/ENSMUSG00000096010.1/protein_coding	173.483	-0.491708	0.113284	-4.3405	1.42159e-05	0.000562031	Hist4h4
F13a1/ENSMUSG00000039109.11/protein_coding	443.308	-0.483508	0.111561	-4.33403	1.46402e-05	0.000577401	F13a1
Ndrg2/ENSMUSG00000004558.10/protein_coding	56.8148	-0.482916	0.111507	-4.33081	1.48561e-05	0.000584494	Ndrg2
Pf4/ENSMUSG00000029373.6/protein_coding	121.979	-0.478438	0.110547	-4.32792	1.50526e-05	0.000590796	Pf4
Rnf213/ENSMUSG00000070327.9/protein_coding	325.863	0.397072	0.0918617	4.32249	1.54276e-05	0.000604054	Rnf213
Cpq/ENSMUSG00000039007.9/protein_coding	279.63	-0.440336	0.101927	-4.32011	1.55951e-05	0.000607684	Cpq
Tm2d1/ENSMUSG00000028563.12/protein_coding	411.803	-0.311525	0.0721055	-4.32041	1.55741e-05	0.000607684	Tm2d1
S100a8/ENSMUSG00000056054.8/protein_coding	1232.04	-0.22856	0.0529452	-4.31693	1.58217e-05	0.000615039	S100a8
Rere/ENSMUSG00000039852.12/protein_coding	951.473	0.336366	0.0780254	4.31097	1.62537e-05	0.000630327	Rere
Lpar6/ENSMUSG00000033446.7/protein_coding	3010.95	-0.281483	0.0653527	-4.30713	1.65386e-05	0.000639847	Lpar6
Fbrsl1/ENSMUSG00000043323.12/protein_coding	1866.33	0.234426	0.0544451	4.30574	1.66431e-05	0.000642361	Fbrsl1
Plbd1/ENSMUSG00000030214.4/protein_coding	186.899	-0.443016	0.102932	-4.30398	1.67759e-05	0.000645951	Plbd1
Psmd1/ENSMUSG00000026229.13/protein_coding	1428.02	0.167138	0.0388522	4.3019	1.6934e-05	0.000650498	Psmd1
Foxred2/ENSMUSG00000016552.9/protein_coding	17.7444	-0.473225	0.110039	-4.30053	1.70393e-05	0.000653001	Foxred2
Mark2/ENSMUSG00000024969.11/protein_coding	1001.39	0.213238	0.0495922	4.29982	1.70939e-05	0.00065355	Mark2
Unc119/ENSMUSG00000002058.9/protein_coding	17.9368	-0.414278	0.0963934	-4.29778	1.72518e-05	0.000658037	Unc119
Tnfrsf17/ENSMUSG00000022496.5/protein_coding	143.631	-0.362456	0.0843701	-4.29602	1.73893e-05	0.000661729	Tnfrsf17
Ndufb4/ENSMUSG00000022820.3/protein_coding	159.133	-0.438628	0.102253	-4.28962	1.78981e-05	0.000679499	Ndufb4
Hn1/ENSMUSG00000020737.8/protein_coding	1104.25	0.20249	0.0472571	4.28486	1.82853e-05	0.000692581	Hn1
Blvrb/ENSMUSG00000040466.11/protein_coding	209.549	-0.35481	0.0828476	-4.28268	1.84655e-05	0.000696355	Blvrb
Pigx/ENSMUSG00000023791.10/protein_coding	363.02	-0.379692	0.0886587	-4.28262	1.84706e-05	0.000696355	Pigx
Cox4i1/ENSMUSG00000031818.8/protein_coding	989.822	-0.276847	0.0646577	-4.28173	1.85445e-05	0.000697523	Cox4i1
Psmd11/ENSMUSG00000017428.12/protein_coding	803.386	0.256636	0.0599688	4.27949	1.87324e-05	0.000702961	Psmd11
Ino80d/ENSMUSG00000040865.11/protein_coding	344.429	0.352977	0.0825416	4.27636	1.89975e-05	0.000711269	Ino80d
Polr2k/ENSMUSG00000045996.8/protein_coding	154.817	-0.355773	0.0832653	-4.27277	1.93064e-05	0.000721171	Polr2k
Abca4/ENSMUSG00000028125.10/protein_coding	3.70164	-0.280361	0.0656471	-4.27072	1.94839e-05	0.000722818	Abca4
Git2/ENSMUSG00000041890.13/protein_coding	2644.24	0.222108	0.0520042	4.27097	1.94628e-05	0.000722818	Git2
Zfp119a/ENSMUSG00000057835.7/protein_coding	251.108	-0.332484	0.0778461	-4.27104	1.9456e-05	0.000722818	Zfp119a
Wfdc21/ENSMUSG00000051748.2/protein_coding	32.5442	-0.223701	0.0524668	-4.26367	2.011e-05	0.000744343	Wfdc21
Gm2956/ENSMUSG00000096574.3/protein_coding	93.6283	-0.472706	0.110935	-4.26112	2.03403e-05	0.000751158	Gm2956
Fkbp5/ENSMUSG00000024222.12/protein_coding	779.968	0.336061	0.0788798	4.26042	2.04043e-05	0.000751813	Fkbp5
Abca7/ENSMUSG00000035722.11/protein_coding	627.652	0.270144	0.0634658	4.25653	2.07627e-05	0.000763286	Abca7
Map4k5/ENSMUSG00000034761.11/protein_coding	693.028	0.220614	0.0518638	4.25371	2.10256e-05	0.000771207	Map4k5
Atp8b4/ENSMUSG00000060131.7/protein_coding	20.8201	-0.401295	0.0945442	-4.24453	2.19055e-05	0.000801673	Atp8b4
Mapk4/ENSMUSG00000024558.8/protein_coding	2.30581	-0.280233	0.0661265	-4.23783	2.2569e-05	0.000824098	Mapk4
Acvrl1/ENSMUSG00000000530.12/protein_coding	429.317	0.3133	0.0740162	4.23286	2.30738e-05	0.000840641	Acvrl1
Ago1/ENSMUSG00000041530.12/protein_coding	224.873	0.412404	0.0974623	4.23142	2.32222e-05	0.000844156	Ago1
Rtcb/ENSMUSG00000001783.3/protein_coding	1131.7	0.216416	0.0511822	4.22834	2.3542e-05	0.000853871	Rtcb
Ptms/ENSMUSG00000030122.10/protein_coding	189.178	0.366202	0.0866568	4.22589	2.38003e-05	0.000861315	Ptms
1810037I17Rik/ENSMUSG00000054091.8/protein_coding	247.438	-0.359915	0.0852167	-4.22352	2.40514e-05	0.000866597	1810037I17Rik
G0s2/ENSMUSG00000009633.3/protein_coding	14.7037	-0.426175	0.100906	-4.22351	2.40529e-05	0.000866597	G0s2
Lpcat1/ENSMUSG00000021608.10/protein_coding	2385.96	0.150353	0.0356145	4.22168	2.42492e-05	0.000871738	Lpcat1
Sc5d/ENSMUSG00000032018.9/protein_coding	275.627	-0.310036	0.0735017	-4.21808	2.4639e-05	0.000883796	Sc5d
RP23-56B11.8/ENSMUSG00000104512.1/antisense	2.86943	0.307786	0.0731095	4.20993	2.55449e-05	0.00091427	RP23-56B11.8
Atp5o/ENSMUSG00000022956.6/protein_coding	371.413	-0.315211	0.0749206	-4.20726	2.58484e-05	0.000923101	Atp5o
Bhlhe41/ENSMUSG00000030256.7/protein_coding	1075.92	0.379757	0.0903061	4.20522	2.60832e-05	0.000929442	Bhlhe41
S100a9/ENSMUSG00000056071.8/protein_coding	1126.31	-0.217549	0.0517619	-4.20288	2.63539e-05	0.000937034	S100a9
Slc25a24/ENSMUSG00000040322.6/protein_coding	8.79783	-0.383758	0.0913716	-4.19997	2.66953e-05	0.000947099	Slc25a24
Retnlg/ENSMUSG00000022651.5/protein_coding	161.806	-0.217435	0.0517892	-4.19846	2.68735e-05	0.000951344	Retnlg
Acvr1/ENSMUSG00000026836.11/protein_coding	617.064	0.285505	0.0680395	4.19617	2.71465e-05	0.000958919	Acvr1
Stra6/ENSMUSG00000032327.10/protein_coding	1.76126	-0.233195	0.0556634	-4.18938	2.7972e-05	0.000985939	Stra6
Notch4/ENSMUSG00000015468.10/protein_coding	191.343	0.417216	0.0996288	4.1877	2.8179e-05	0.000991083	Notch4
Slc6a20b/ENSMUSG00000025243.10/protein_coding	5.5749	-0.390645	0.0933621	-4.18419	2.86188e-05	0.00100438	Slc6a20b
Ankrd10/ENSMUSG00000031508.9/protein_coding	815.097	0.222724	0.0532524	4.18242	2.88425e-05	0.00101005	Ankrd10
St3gal5/ENSMUSG00000056091.8/protein_coding	2919.53	0.212515	0.0508905	4.17593	2.96777e-05	0.00103706	St3gal5
Pira2/ENSMUSG00000089942.5/protein_coding	30.3347	-0.445845	0.106778	-4.17543	2.97428e-05	0.00103711	Pira2
Inppl1/ENSMUSG00000032737.8/protein_coding	470.283	0.323692	0.0775445	4.17428	2.98932e-05	0.00104012	Inppl1
Ndufs8/ENSMUSG00000059734.6/protein_coding	683.778	-0.261269	0.0626466	-4.17052	3.03905e-05	0.00105516	Ndufs8
Chchd6/ENSMUSG00000030086.12/protein_coding	55.3199	-0.434942	0.104303	-4.16998	3.04626e-05	0.00105541	Chchd6
Ifi30/ENSMUSG00000031838.7/protein_coding	452.444	0.358834	0.0860738	4.16892	3.06049e-05	0.00105705	Ifi30
Serpinb9/ENSMUSG00000045827.6/protein_coding	223.447	-0.319939	0.0767488	-4.16866	3.06401e-05	0.00105705	Serpinb9
Hook3/ENSMUSG00000037234.12/protein_coding	1042.78	0.299692	0.0719677	4.16426	3.12358e-05	0.00107532	Hook3
Btk/ENSMUSG00000031264.9/protein_coding	1016.18	0.205681	0.0494443	4.15985	3.18454e-05	0.00109006	Btk
Mpc2/ENSMUSG00000026568.6/protein_coding	305.152	-0.300482	0.0722303	-4.16005	3.18177e-05	0.00109006	Mpc2
Slco4a1/ENSMUSG00000038963.11/protein_coding	1175.61	0.282639	0.0679468	4.15971	3.18651e-05	0.00109006	Slco4a1
Ddx5/ENSMUSG00000020719.10/protein_coding	7444.1	0.266144	0.0640447	4.1556	3.2443e-05	0.00110694	Ddx5
Klhl18/ENSMUSG00000054792.11/protein_coding	492.938	0.267909	0.064475	4.15524	3.24948e-05	0.00110694	Klhl18
Arhgef10l/ENSMUSG00000040964.12/protein_coding	585.053	-0.283996	0.0684448	-4.14927	3.33532e-05	0.0011338	Arhgef10l
Zzef1/ENSMUSG00000055670.9/protein_coding	499.58	0.305409	0.0736296	4.1479	3.35534e-05	0.00113822	Zzef1
Gzmb/ENSMUSG00000015437.4/protein_coding	12.3135	-0.342981	0.0827227	-4.14616	3.38104e-05	0.00114455	Gzmb
Kcna3/ENSMUSG00000047959.3/protein_coding	67.4832	0.434036	0.104734	4.14418	3.41025e-05	0.00115204	Kcna3
Soga1/ENSMUSG00000055485.6/protein_coding	2675.4	0.241525	0.0583592	4.1386	3.49438e-05	0.00117801	Soga1
Pdlim7/ENSMUSG00000021493.11/protein_coding	7.54972	-0.364494	0.0881449	-4.13517	3.54696e-05	0.0011908	Pdlim7
Selplg/ENSMUSG00000048163.9/protein_coding	63391.3	0.203332	0.0491674	4.1355	3.54184e-05	0.0011908	Selplg
Speg/ENSMUSG00000026207.12/protein_coding	152.33	-0.343622	0.0831152	-4.13428	3.56062e-05	0.00119292	Speg
Fos/ENSMUSG00000021250.9/protein_coding	605.912	0.409028	0.0989734	4.1327	3.58522e-05	0.00119869	Fos
1110059E24Rik/ENSMUSG00000035171.5/protein_coding	265.145	-0.332088	0.0804226	-4.12928	3.63895e-05	0.00121416	1110059E24Rik
Cd9/ENSMUSG00000030342.8/protein_coding	10312.8	-0.274427	0.0665171	-4.12565	3.69684e-05	0.00123094	Cd9
Il1b/ENSMUSG00000027398.9/protein_coding	70.1578	-0.460488	0.111661	-4.12397	3.72401e-05	0.00123745	Il1b
Arrb2/ENSMUSG00000060216.11/protein_coding	2574.44	0.273757	0.0664808	4.11783	3.82456e-05	0.00126189	Arrb2
Ndufa7/ENSMUSG00000041881.8/protein_coding	422.214	-0.362212	0.0879736	-4.11727	3.8338e-05	0.00126189	Ndufa7
Nfib/ENSMUSG00000008575.13/protein_coding	2.20048	-0.283111	0.0687631	-4.1172	3.83504e-05	0.00126189	Nfib
Tbc1d9/ENSMUSG00000031709.11/protein_coding	612.464	0.404729	0.098286	4.11787	3.82388e-05	0.00126189	Tbc1d9
Tmem208/ENSMUSG00000014856.8/protein_coding	601.81	-0.345153	0.0838335	-4.11712	3.83639e-05	0.00126189	Tmem208
Enpp5/ENSMUSG00000023960.9/protein_coding	133.886	-0.432625	0.105092	-4.11664	3.84437e-05	0.00126196	Enpp5
Pi16/ENSMUSG00000024011.12/protein_coding	15.1091	-0.368205	0.0895825	-4.11023	3.95263e-05	0.00129488	Pi16
Hmgn2/ENSMUSG00000003038.11/protein_coding	1085.96	-0.248108	0.0603819	-4.10899	3.97398e-05	0.00129926	Hmgn2
Basp1/ENSMUSG00000045763.7/protein_coding	2448.21	0.226964	0.0552493	4.108	3.99099e-05	0.0013022	Basp1
Atp1b3/ENSMUSG00000032412.8/protein_coding	2767.79	-0.183008	0.0445629	-4.10673	4.01301e-05	0.00130676	Atp1b3
Eif2ak2/ENSMUSG00000024079.4/protein_coding	229.356	0.309365	0.0753674	4.10475	4.04748e-05	0.00131535	Eif2ak2
Adipor1/ENSMUSG00000026457.10/protein_coding	2380.54	-0.218873	0.0533364	-4.10364	4.06696e-05	0.00131904	Adipor1
Cpe/ENSMUSG00000037852.7/protein_coding	22.1009	-0.446734	0.108956	-4.10013	4.1291e-05	0.00133003	Cpe
Lyzl4/ENSMUSG00000032530.9/protein_coding	25.8965	-0.464519	0.113286	-4.1004	4.12442e-05	0.00133003	Lyzl4
Ndufa11/ENSMUSG00000002379.6/protein_coding	268.859	-0.314342	0.0766493	-4.10104	4.11305e-05	0.00133003	Ndufa11
Stx11/ENSMUSG00000039232.7/protein_coding	23.4145	-0.327932	0.0799858	-4.09988	4.13359e-05	0.00133003	Stx11
Fat3/ENSMUSG00000074505.4/protein_coding	269.725	0.422918	0.103357	4.09183	4.27985e-05	0.00137437	Fat3
Klf6/ENSMUSG00000000078.6/protein_coding	1519.55	0.275061	0.0672397	4.09076	4.29963e-05	0.001378	Klf6
Zfp607/ENSMUSG00000020420.7/protein_coding	96.4386	-0.397511	0.0972252	-4.08856	4.3406e-05	0.00138839	Zfp607
Srsf6/ENSMUSG00000016921.10/protein_coding	1725.44	0.287087	0.0702362	4.08746	4.36131e-05	0.00139228	Srsf6
Cmip/ENSMUSG00000034390.11/protein_coding	751.307	0.269653	0.0660834	4.0805	4.4938e-05	0.00143176	Cmip
Rars/ENSMUSG00000018848.4/protein_coding	382.112	0.234157	0.0574154	4.07829	4.53676e-05	0.00144262	Rars
AI413582/ENSMUSG00000062753.9/protein_coding	432.324	-0.356312	0.087389	-4.07731	4.55603e-05	0.00144592	AI413582
H3f3a/ENSMUSG00000060743.8/protein_coding	2622.19	-0.247062	0.0606199	-4.0756	4.58965e-05	0.00144992	H3f3a
Il1a/ENSMUSG00000027399.1/protein_coding	1426.59	0.313506	0.0769259	4.07542	4.59305e-05	0.00144992	Il1a
Tmem59/ENSMUSG00000028618.7/protein_coding	6053.38	-0.215457	0.052869	-4.0753	4.59541e-05	0.00144992	Tmem59
4930523C07Rik/ENSMUSG00000090394.4/protein_coding	37.2479	-0.458589	0.112691	-4.06946	4.7123e-05	0.0014831	4930523C07Rik
Tgm2/ENSMUSG00000037820.11/protein_coding	1472	0.327153	0.0803987	4.06913	4.71882e-05	0.0014831	Tgm2
Paox/ENSMUSG00000025464.10/protein_coding	247.522	-0.324937	0.079869	-4.06838	4.73411e-05	0.00148503	Paox
Usb1/ENSMUSG00000031792.10/protein_coding	160.426	-0.313038	0.0770337	-4.06365	4.83113e-05	0.00151254	Usb1
BC043934/ENSMUSG00000056418.3/lincRNA	155.962	-0.336448	0.0828341	-4.0617	4.87162e-05	0.00152229	BC043934
Daam1/ENSMUSG00000034574.9/protein_coding	92.0833	0.424026	0.104444	4.05985	4.91035e-05	0.00152872	Daam1
Purb/ENSMUSG00000094483.2/protein_coding	624.851	0.277717	0.0684061	4.05982	4.91103e-05	0.00152872	Purb
Uqcr11/ENSMUSG00000020163.8/protein_coding	419.655	-0.350486	0.0863587	-4.05849	4.93913e-05	0.00153453	Uqcr11
Tomm5/ENSMUSG00000078713.4/protein_coding	205.001	-0.359783	0.0887519	-4.0538	5.03915e-05	0.00156262	Tomm5
Lcn2/ENSMUSG00000026822.10/protein_coding	183.861	-0.204356	0.0504169	-4.05332	5.04957e-05	0.00156287	Lcn2
Myrip/ENSMUSG00000041794.8/protein_coding	1.32121	-0.215029	0.0530908	-4.0502	5.11737e-05	0.00158084	Myrip
Bcap29/ENSMUSG00000020650.10/protein_coding	694.797	-0.264775	0.0654056	-4.0482	5.16135e-05	0.0015914	Bcap29
Parva/ENSMUSG00000030770.10/protein_coding	3.75261	-0.261278	0.0645802	-4.0458	5.21452e-05	0.00160475	Parva
Slc25a45/ENSMUSG00000024818.10/protein_coding	3396.29	-0.170898	0.0422638	-4.0436	5.26375e-05	0.00161684	Slc25a45
Cnr2/ENSMUSG00000062585.7/protein_coding	447.874	0.244317	0.060539	4.0357	5.44399e-05	0.00166904	Cnr2
Cetn2/ENSMUSG00000031347.8/protein_coding	212.352	-0.294931	0.0730894	-4.03521	5.45538e-05	0.00166939	Cetn2
Hist1h1c/ENSMUSG00000036181.2/protein_coding	605.268	-0.400674	0.0993408	-4.03333	5.49923e-05	0.00167964	Hist1h1c
Ly75/ENSMUSG00000026980.11/protein_coding	5.70543	-0.280163	0.0695412	-4.02873	5.60787e-05	0.00170961	Ly75
Cp/ENSMUSG00000003617.12/protein_coding	60.6834	-0.45612	0.113233	-4.02817	5.6213e-05	0.0017105	Cp
H2-Q7/ENSMUSG00000060550.11/protein_coding	104.854	-0.448293	0.111324	-4.02693	5.65104e-05	0.00171314	H2-Q7
RP23-388I22.1/ENSMUSG00000102503.1/TEC	22.3467	0.451637	0.112154	4.02693	5.65109e-05	0.00171314	RP23-388I22.1
Dpp9/ENSMUSG00000001229.7/protein_coding	418.184	0.285997	0.0710431	4.02568	5.68115e-05	0.00171905	Dpp9
Adipor2/ENSMUSG00000030168.9/protein_coding	291.913	0.281616	0.0699795	4.02427	5.71523e-05	0.00172615	Adipor2
Bmp7/ENSMUSG00000008999.7/protein_coding	1.70977	-0.230419	0.0572817	-4.02255	5.75709e-05	0.00173556	Bmp7
Cmklr1/ENSMUSG00000042190.8/protein_coding	176.774	0.343542	0.0854811	4.01892	5.84657e-05	0.00175928	Cmklr1
Pag1/ENSMUSG00000027508.11/protein_coding	2613.7	0.357651	0.0890337	4.01703	5.89355e-05	0.00177014	Pag1
Tgs1/ENSMUSG00000028233.6/protein_coding	722.374	0.213387	0.0531369	4.0158	5.92454e-05	0.00177616	Tgs1
Rsrp1/ENSMUSG00000037266.14/protein_coding	11181.4	-0.311326	0.0775582	-4.0141	5.96733e-05	0.00178569	Rsrp1
Sep15/ENSMUSG00000037072.11/protein_coding	2828.74	-0.321003	0.079984	-4.01334	5.98658e-05	0.00178816	2016-09-15
AB124611/ENSMUSG00000057191.9/protein_coding	36.0785	-0.452752	0.112863	-4.01151	6.03306e-05	0.00179704	AB124611
Smarca4/ENSMUSG00000032187.12/protein_coding	709.542	0.24979	0.0622715	4.0113	6.03843e-05	0.00179704	Smarca4
Ghitm/ENSMUSG00000041028.11/protein_coding	2470.92	-0.211781	0.0528195	-4.00953	6.08409e-05	0.00180402	Ghitm
Klf5/ENSMUSG00000005148.7/protein_coding	1.75732	-0.227584	0.0567569	-4.0098	6.07703e-05	0.00180402	Klf5
Ermap/ENSMUSG00000028644.12/protein_coding	131.717	-0.384974	0.0960301	-4.00888	6.10064e-05	0.00180563	Ermap
Glul/ENSMUSG00000026473.11/protein_coding	4165.33	0.402902	0.100536	4.00754	6.13555e-05	0.00181266	Glul
Vps54/ENSMUSG00000020128.11/protein_coding	647.828	0.246181	0.0614835	4.00402	6.22759e-05	0.00183652	Vps54
BC004004/ENSMUSG00000052712.12/protein_coding	737.306	-0.187738	0.046897	-4.00321	6.24897e-05	0.00183948	BC004004
Gapdh/ENSMUSG00000057666.14/protein_coding	3293.27	0.225355	0.0563225	4.00115	6.30362e-05	0.00185222	Gapdh
Gpr141/ENSMUSG00000053101.2/protein_coding	32.4201	-0.426141	0.106564	-3.99893	6.36297e-05	0.00186376	Gpr141
Ormdl1/ENSMUSG00000026097.5/protein_coding	624.271	-0.355891	0.088999	-3.99882	6.36587e-05	0.00186376	Ormdl1
Lck/ENSMUSG00000000409.10/protein_coding	9.6776	-0.393671	0.0985319	-3.99537	6.45946e-05	0.00188776	Lck
Pik3r1/ENSMUSG00000041417.11/protein_coding	2138.23	0.237861	0.0595543	3.99401	6.49638e-05	0.00189202	Pik3r1
Snap25/ENSMUSG00000027273.9/protein_coding	27.056	-0.451407	0.113022	-3.99398	6.4973e-05	0.00189202	Snap25
Ndufa1/ENSMUSG00000016427.7/protein_coding	248.806	-0.27015	0.067648	-3.99346	6.51158e-05	0.00189279	Ndufa1
Slc27a1/ENSMUSG00000031808.6/protein_coding	299.943	-0.308598	0.0772932	-3.99256	6.53644e-05	0.00189662	Slc27a1
Donson/ENSMUSG00000022960.8/protein_coding	295.203	-0.259202	0.0650118	-3.98699	6.69157e-05	0.00193817	Donson
Tceal1/ENSMUSG00000049536.5/protein_coding	155.854	-0.305708	0.0767445	-3.98346	6.79197e-05	0.00196375	Tceal1
Dnm1l/ENSMUSG00000022789.10/protein_coding	468.047	0.252402	0.0634675	3.97687	6.98272e-05	0.0020134	Dnm1l
Rpl17/ENSMUSG00000062328.7/protein_coding	294.622	-0.36055	0.090666	-3.97668	6.98849e-05	0.0020134	Rpl17
Pglyrp1/ENSMUSG00000030413.6/protein_coding	41.0296	-0.261626	0.0658446	-3.97338	7.08587e-05	0.00203785	Pglyrp1
Plekhg5/ENSMUSG00000039713.12/protein_coding	215.443	0.264688	0.0666262	3.97273	7.1055e-05	0.00203988	Plekhg5
Ly6g6d/ENSMUSG00000073413.5/protein_coding	23.2391	-0.449176	0.113096	-3.97163	7.13834e-05	0.0020457	Ly6g6d
Hist2h2aa1/ENSMUSG00000063954.7/protein_coding	118.666	-0.446727	0.112555	-3.96898	7.21816e-05	0.0020613	Hist2h2aa1
Ly6g/ENSMUSG00000022582.4/protein_coding	16.2968	-0.195421	0.0492327	-3.96933	7.20749e-05	0.0020613	Ly6g
Bcr/ENSMUSG00000009681.9/protein_coding	45.0388	0.43094	0.108594	3.96837	7.23671e-05	0.00206297	Bcr
F9/ENSMUSG00000031138.4/protein_coding	163.389	-0.341179	0.0860619	-3.96435	7.35964e-05	0.00209329	F9
Zfp219/ENSMUSG00000049295.12/protein_coding	181.471	0.326752	0.0824289	3.96405	7.36884e-05	0.00209329	Zfp219
Bnip3/ENSMUSG00000078566.4/protein_coding	580.922	-0.321252	0.0810503	-3.96362	7.38219e-05	0.00209342	Bnip3
Tspan18/ENSMUSG00000027217.9/protein_coding	882.69	0.29575	0.0746363	3.96255	7.41547e-05	0.0020992	Tspan18
Rasa1/ENSMUSG00000021549.9/protein_coding	1132.67	0.201732	0.0509778	3.95724	7.58194e-05	0.00214259	Rasa1
Marcksl1/ENSMUSG00000047945.6/protein_coding	216.694	0.291835	0.0737687	3.95608	7.61903e-05	0.00214933	Marcksl1
Fes/ENSMUSG00000053158.9/protein_coding	2205	0.18887	0.0477683	3.95387	7.68967e-05	0.0021655	Fes
Kif5a/ENSMUSG00000074657.4/protein_coding	17.1626	-0.359303	0.0909036	-3.95257	7.7317e-05	0.00217357	Kif5a
Tmc7/ENSMUSG00000042246.4/protein_coding	621.338	0.246572	0.0624039	3.95123	7.77498e-05	0.00218196	Tmc7
Cdc42ep3/ENSMUSG00000036533.8/protein_coding	134.441	-0.3247	0.0822146	-3.94942	7.83398e-05	0.00219428	Cdc42ep3
Mrgpre/ENSMUSG00000048965.8/protein_coding	193.02	0.377428	0.0955741	3.94906	7.84586e-05	0.00219428	Mrgpre
Rc3h1/ENSMUSG00000040423.6/protein_coding	396.552	0.29879	0.0756841	3.94786	7.88535e-05	0.00220153	Rc3h1
Enc1/ENSMUSG00000041773.7/protein_coding	98.9538	0.442613	0.112144	3.94684	7.91888e-05	0.0022071	Enc1
Pcolce/ENSMUSG00000029718.10/protein_coding	7.71608	-0.389314	0.0986616	-3.94595	7.94852e-05	0.00221157	Pcolce
Ecscr/ENSMUSG00000073599.5/protein_coding	2375.36	-0.212757	0.0539492	-3.94366	8.02481e-05	0.00222898	Ecscr
Ppp1r15a/ENSMUSG00000040435.10/protein_coding	750.109	0.372027	0.0943691	3.94225	8.07206e-05	0.00223827	Ppp1r15a
Zfhx3/ENSMUSG00000038872.9/protein_coding	2960.34	0.311036	0.0789163	3.94134	8.10274e-05	0.00224296	Zfhx3
Arhgap15/ENSMUSG00000049744.11/protein_coding	75.3856	-0.440811	0.111875	-3.9402	8.14145e-05	0.00224984	Arhgap15
Grpel1/ENSMUSG00000029198.3/protein_coding	397.428	-0.274502	0.0696927	-3.93875	8.19074e-05	0.00225961	Grpel1
Cybb/ENSMUSG00000015340.6/protein_coding	453.173	-0.444939	0.113036	-3.93628	8.27558e-05	0.00227704	Cybb
Ehd1/ENSMUSG00000024772.9/protein_coding	54.1529	-0.442546	0.112433	-3.93609	8.28191e-05	0.00227704	Ehd1
Cd209f/ENSMUSG00000051906.10/protein_coding	42.4699	-0.440094	0.111849	-3.93472	8.32938e-05	0.00228622	Cd209f
Dll1/ENSMUSG00000014773.9/protein_coding	18.6486	-0.430492	0.109553	-3.92953	8.51129e-05	0.00233221	Dll1
Gpx8/ENSMUSG00000021760.3/protein_coding	1.48353	-0.196503	0.0500163	-3.92877	8.53828e-05	0.00233566	Gpx8
Plxna4os1/ENSMUSG00000086763.1/antisense	221.246	-0.3282	0.0835501	-3.92819	8.5589e-05	0.00233737	Plxna4os1
Tmem40/ENSMUSG00000059900.10/protein_coding	5.84143	-0.364804	0.0929788	-3.92351	8.72668e-05	0.00237919	Tmem40
Sec22a/ENSMUSG00000034473.9/protein_coding	286.421	-0.332379	0.0847451	-3.9221	8.77788e-05	0.00238914	Sec22a
Acaa1a/ENSMUSG00000036138.12/protein_coding	1273.58	-0.196115	0.0500221	-3.92057	8.83391e-05	0.00239636	Acaa1a
Gmfg/ENSMUSG00000060791.11/protein_coding	430.756	-0.279763	0.0713505	-3.92097	8.8194e-05	0.00239636	Gmfg
Trim30a/ENSMUSG00000030921.12/protein_coding	664.108	0.23335	0.0595637	3.91766	8.94133e-05	0.00242146	Trim30a
Ackr3/ENSMUSG00000044337.5/protein_coding	17.7515	-0.43271	0.11053	-3.91486	9.04583e-05	0.00244168	Ackr3
D430042O09Rik/ENSMUSG00000032743.11/protein_coding	92.8583	0.377716	0.096483	3.91485	9.04606e-05	0.00244168	D430042O09Rik
Mobp/ENSMUSG00000032517.11/protein_coding	19.4459	-0.403549	0.103118	-3.91348	9.09738e-05	0.00245147	Mobp
Ccnd2/ENSMUSG00000000184.9/protein_coding	15.8469	-0.432923	0.110653	-3.91244	9.13675e-05	0.002458	Ccnd2
Cox6b1/ENSMUSG00000036751.6/protein_coding	588.076	-0.284398	0.0727727	-3.90803	9.30502e-05	0.002495	Cox6b1
Tbc1d16/ENSMUSG00000039976.3/protein_coding	671.055	0.363457	0.0929992	3.90817	9.29963e-05	0.002495	Tbc1d16
Ankrd17/ENSMUSG00000055204.10/protein_coding	434.804	0.282278	0.0722862	3.905	9.42254e-05	0.00252235	Ankrd17
Tefm/ENSMUSG00000046909.9/protein_coding	177.556	-0.349564	0.089547	-3.9037	9.4735e-05	0.00253183	Tefm
H2afz/ENSMUSG00000037894.9/protein_coding	1418.97	-0.241743	0.0619524	-3.90207	9.53739e-05	0.00254054	H2afz
Ndufa3/ENSMUSG00000035674.9/protein_coding	378.079	-0.245252	0.0628493	-3.90222	9.53151e-05	0.00254054	Ndufa3
Slc28a2/ENSMUSG00000027219.9/protein_coding	9.31884	-0.345725	0.0886782	-3.89865	9.67324e-05	0.00257251	Slc28a2
Baz1a/ENSMUSG00000035021.9/protein_coding	387.706	0.306506	0.0786437	3.8974	9.72297e-05	0.00258151	Baz1a
Cpn1/ENSMUSG00000025196.4/protein_coding	5.62772	-0.369053	0.0947691	-3.89424	9.85082e-05	0.00260694	Cpn1
Rell1/ENSMUSG00000047881.10/protein_coding	78.6385	-0.434704	0.111627	-3.89426	9.84991e-05	0.00260694	Rell1
Mt3/ENSMUSG00000031760.8/protein_coding	5.0596	-0.293747	0.0755035	-3.89051	0.000100033	0.00264299	Mt3
Ebf3/ENSMUSG00000010476.9/protein_coding	101.966	0.395808	0.101816	3.88747	0.000101296	0.00267202	Ebf3
Pcolce2/ENSMUSG00000015354.8/protein_coding	1.15531	-0.194241	0.049975	-3.88677	0.000101585	0.00267529	Pcolce2
Gm16712/ENSMUSG00000097077.1/lincRNA	27.4339	-0.438936	0.112997	-3.88448	0.000102548	0.00269628	Gm16712
Hist1h2ac/ENSMUSG00000069270.5/protein_coding	27.0835	-0.437097	0.112581	-3.88252	0.000103379	0.00270936	Hist1h2ac
Mrpl20/ENSMUSG00000029066.8/protein_coding	226.083	-0.298445	0.0768683	-3.88255	0.000103366	0.00270936	Mrpl20
Gzma/ENSMUSG00000023132.7/protein_coding	17.6566	-0.282354	0.072785	-3.87928	0.000104766	0.0027386	Gzma
Hipk2/ENSMUSG00000061436.11/protein_coding	513.899	0.289596	0.074655	3.87913	0.000104832	0.0027386	Hipk2
Aqp9/ENSMUSG00000032204.9/protein_coding	4.27176	-0.235572	0.0607382	-3.87849	0.000105109	0.00273917	Aqp9
Folr2/ENSMUSG00000032725.9/protein_coding	45.2759	-0.436957	0.112667	-3.8783	0.000105191	0.00273917	Folr2
Emp3/ENSMUSG00000040212.7/protein_coding	214.116	0.302967	0.0781493	3.87676	0.000105855	0.00275207	Emp3
Tmed2/ENSMUSG00000029390.9/protein_coding	4789.51	-0.248673	0.0641803	-3.87459	0.000106803	0.00277227	Tmed2
Tmed3/ENSMUSG00000032353.8/protein_coding	1295.76	-0.205382	0.0530427	-3.87202	0.000107937	0.00279724	Tmed3
Hsd11b1/ENSMUSG00000016194.10/protein_coding	11.9622	-0.301471	0.0779012	-3.86991	0.000108876	0.00281709	Hsd11b1
Chtf8/ENSMUSG00000046691.9/protein_coding	313.163	0.351013	0.0907517	3.86784	0.000109806	0.00283426	Chtf8
Qser1/ENSMUSG00000074994.4/protein_coding	196.762	0.376106	0.0972439	3.86765	0.000109889	0.00283426	Qser1
Tjp3/ENSMUSG00000034917.7/protein_coding	7.64671	-0.37282	0.0964509	-3.86539	0.000110913	0.00285615	Tjp3
Ctnnal1/ENSMUSG00000038816.10/protein_coding	290.902	0.255211	0.066038	3.86461	0.000111266	0.00285617	Ctnnal1
Fbxo6/ENSMUSG00000055401.10/protein_coding	341.724	-0.252558	0.0653497	-3.86471	0.000111222	0.00285617	Fbxo6
Coro1c/ENSMUSG00000004530.8/protein_coding	1084.49	0.168948	0.0437396	3.86258	0.000112197	0.00287553	Coro1c
Adprh/ENSMUSG00000002844.8/protein_coding	1298.43	-0.16469	0.0426476	-3.86166	0.000112621	0.00288186	Adprh
Ankrd28/ENSMUSG00000014496.7/protein_coding	97.4432	-0.37661	0.0976792	-3.85558	0.000115455	0.00294974	Ankrd28
Bmp2k/ENSMUSG00000034663.9/protein_coding	5187.48	0.241228	0.0626289	3.8517	0.000117301	0.00295857	Bmp2k
Ccdc162/ENSMUSG00000075225.7/protein_coding	211.578	-0.346358	0.0899267	-3.85156	0.000117369	0.00295857	Ccdc162
Gpx1/ENSMUSG00000063856.7/protein_coding	2787.28	-0.287181	0.0745652	-3.85141	0.00011744	0.00295857	Gpx1
Mgam/ENSMUSG00000068587.6/protein_coding	1.59327	-0.207708	0.0539001	-3.85358	0.000116403	0.00295857	Mgam
Polr1c/ENSMUSG00000067148.11/protein_coding	144.26	-0.346853	0.0900487	-3.85184	0.000117234	0.00295857	Polr1c
Skp1a/ENSMUSG00000036309.10/protein_coding	977.052	-0.185542	0.0481472	-3.85365	0.000116372	0.00295857	Skp1a
Synj1/ENSMUSG00000022973.13/protein_coding	979.263	0.233316	0.0605569	3.85285	0.000116752	0.00295857	Synj1
Zfyve21/ENSMUSG00000021286.7/protein_coding	391.209	-0.317669	0.0824189	-3.85432	0.000116051	0.00295857	Zfyve21
Znhit3/ENSMUSG00000020526.8/protein_coding	130.368	-0.386995	0.100442	-3.85291	0.000116724	0.00295857	Znhit3
Ocln/ENSMUSG00000021638.8/protein_coding	74.1568	0.411829	0.106971	3.84991	0.000118163	0.00297218	Ocln
Cnn3/ENSMUSG00000053931.7/protein_coding	11.4663	-0.396856	0.103116	-3.84865	0.000118772	0.00297828	Cnn3
Pknox1/ENSMUSG00000006705.8/protein_coding	1209.45	-0.200345	0.0520532	-3.84885	0.000118673	0.00297828	Pknox1
Prdm15/ENSMUSG00000014039.13/protein_coding	240.877	0.32303	0.0839764	3.84667	0.000119734	0.00299777	Prdm15
Cyp4f13/ENSMUSG00000024055.10/protein_coding	853.488	-0.236214	0.061423	-3.84569	0.000120213	0.00300514	Cyp4f13
Klra2/ENSMUSG00000030187.11/protein_coding	27.3939	-0.429062	0.111669	-3.84225	0.00012191	0.00304288	Klra2
Khk/ENSMUSG00000029162.11/protein_coding	456.39	-0.298435	0.0776972	-3.84099	0.000122537	0.00305008	Khk
Lin28a/ENSMUSG00000050966.5/protein_coding	1.24594	-0.189393	0.0493142	-3.84054	0.000122761	0.00305008	Lin28a
Tmem97/ENSMUSG00000037278.9/protein_coding	184.152	-0.306275	0.0797403	-3.84091	0.000122577	0.00305008	Tmem97
Aifm2/ENSMUSG00000020085.11/protein_coding	12.2017	-0.398375	0.103794	-3.83814	0.00012397	0.00307541	Aifm2
Elof1/ENSMUSG00000013822.6/protein_coding	179.957	-0.345222	0.0900978	-3.83163	0.000127297	0.00315314	Elof1
Tubb5/ENSMUSG00000001525.10/protein_coding	1016.48	0.25717	0.067145	3.83007	0.000128109	0.0031684	Tubb5
Sparcl1/ENSMUSG00000029309.3/protein_coding	12.2626	-0.371353	0.0969742	-3.8294	0.000128454	0.00317212	Sparcl1
Eif3a/ENSMUSG00000024991.7/protein_coding	940.907	0.238139	0.062237	3.82633	0.000130068	0.0032071	Eif3a
Pkp4/ENSMUSG00000026991.16/protein_coding	95.9184	-0.33125	0.0865799	-3.82595	0.000130269	0.00320719	Pkp4
9130023H24Rik/ENSMUSG00000062944.3/protein_coding	204.364	-0.296951	0.0776612	-3.82367	0.000131483	0.00323216	9130023H24Rik
Banp/ENSMUSG00000025316.12/protein_coding	240.939	0.400227	0.104718	3.82195	0.000132401	0.00324492	Banp
Tsen15/ENSMUSG00000014980.10/protein_coding	149.397	-0.311372	0.0814677	-3.82203	0.000132359	0.00324492	Tsen15
Commd2/ENSMUSG00000036513.11/protein_coding	299.264	-0.336575	0.0880983	-3.82045	0.000133209	0.0032549	Commd2
Gm10177/ENSMUSG00000090136.4/transcribed_processed_pseudogene	147.62	-0.363327	0.0950982	-3.82055	0.000133156	0.0032549	Gm10177
Sspn/ENSMUSG00000030255.9/protein_coding	64.0778	-0.399822	0.104763	-3.81643	0.000135398	0.00330344	Sspn
Arhgap18/ENSMUSG00000039031.11/protein_coding	228.105	-0.288776	0.0756751	-3.81599	0.000135637	0.00330429	Arhgap18
Pak4/ENSMUSG00000030602.8/protein_coding	540.655	0.211025	0.0553125	3.81514	0.000136104	0.0033107	Pak4
Egln1/ENSMUSG00000031987.5/protein_coding	491.655	0.237376	0.0622319	3.81438	0.000136525	0.00331104	Egln1
Olfm4/ENSMUSG00000022026.6/protein_coding	31.0921	-0.431893	0.113227	-3.81442	0.000136505	0.00331104	Olfm4
Rps27l/ENSMUSG00000036781.9/protein_coding	310.512	-0.307753	0.0807319	-3.81204	0.000137827	0.00333763	Rps27l
Dock10/ENSMUSG00000038608.11/protein_coding	5564.69	0.205656	0.0539627	3.81108	0.000138359	0.00334552	Dock10
Lgi1/ENSMUSG00000067242.7/protein_coding	1.89005	-0.227054	0.0596068	-3.80919	0.00013942	0.00336118	Lgi1
Psma7/ENSMUSG00000027566.10/protein_coding	884.622	-0.288214	0.0756606	-3.80931	0.000139357	0.00336118	Psma7
Npc1/ENSMUSG00000024413.9/protein_coding	1527.61	0.262207	0.0688847	3.80646	0.000140971	0.00339353	Npc1
Pacs2/ENSMUSG00000021143.9/protein_coding	840.571	0.253056	0.0664967	3.80554	0.000141495	0.00340112	Pacs2
Msrb1/ENSMUSG00000075705.8/protein_coding	50.0847	-0.428281	0.112609	-3.80325	0.000142811	0.00342767	Msrb1
Nploc4/ENSMUSG00000039703.11/protein_coding	1107.8	0.18841	0.0495536	3.80214	0.000143454	0.00343297	Nploc4
Tomm20/ENSMUSG00000093904.1/protein_coding	713.742	-0.285359	0.0750468	-3.80242	0.000143288	0.00343297	Tomm20
Galnt7/ENSMUSG00000031608.9/protein_coding	383.244	0.226381	0.0596277	3.79658	0.000146707	0.00349537	Galnt7
Thrap3/ENSMUSG00000043962.12/protein_coding	1118.4	0.209344	0.0551393	3.79663	0.000146674	0.00349537	Thrap3
Zmynd15/ENSMUSG00000040829.10/protein_coding	85.8116	-0.39261	0.103392	-3.79729	0.000146287	0.00349537	Zmynd15
1700047M11Rik/ENSMUSG00000100147.2/lincRNA	2.03146	-0.196064	0.0516862	-3.79334	0.000148632	0.00353606	1700047M11Rik
Cdk17/ENSMUSG00000020015.9/protein_coding	670.272	0.195013	0.0514318	3.79167	0.000149636	0.00355473	Cdk17
Acsbg1/ENSMUSG00000032281.7/protein_coding	4.76889	-0.311815	0.0822709	-3.79009	0.00015059	0.00357217	Acsbg1
Stat4/ENSMUSG00000062939.7/protein_coding	6.54122	-0.306434	0.0808704	-3.78919	0.000151137	0.00357992	Stat4
2610042L04Rik/ENSMUSG00000079388.5/protein_coding	71.3696	-0.406582	0.107325	-3.78831	0.000151676	0.00358223	2610042L04Rik
Nfe2/ENSMUSG00000058794.8/protein_coding	31.9888	-0.311551	0.0822363	-3.78848	0.00015157	0.00358223	Nfe2
Il6ra/ENSMUSG00000027947.7/protein_coding	3347.68	0.268753	0.0709837	3.78612	0.000153016	0.00360864	Il6ra
Nek6/ENSMUSG00000026749.7/protein_coding	2071.49	-0.188349	0.0497745	-3.78404	0.000154305	0.00362851	Nek6
Supt4a/ENSMUSG00000020485.10/protein_coding	413.515	-0.295413	0.0780648	-3.78421	0.000154198	0.00362851	Supt4a
Itgb8/ENSMUSG00000025321.10/protein_coding	2.88573	-0.257203	0.0680042	-3.78216	0.000155472	0.00365067	Itgb8
Fam20c/ENSMUSG00000025854.11/protein_coding	118.428	0.371265	0.0982507	3.77876	0.000157614	0.00369564	Fam20c
Vezt/ENSMUSG00000036099.12/protein_coding	188.366	0.281549	0.0745688	3.77569	0.000159565	0.00373599	Vezt
Timp3/ENSMUSG00000020044.9/protein_coding	3.73247	-0.263139	0.069734	-3.77347	0.000160993	0.00376399	Timp3
Mkks/ENSMUSG00000027274.12/protein_coding	189.187	-0.292554	0.0775825	-3.77088	0.000162675	0.00379785	Mkks
Gpr35/ENSMUSG00000026271.11/protein_coding	350.647	0.271821	0.0721081	3.76963	0.00016349	0.0038114	Gpr35
Tm7sf3/ENSMUSG00000040234.12/protein_coding	865.305	-0.204753	0.0543358	-3.7683	0.000164364	0.0038263	Tm7sf3
Heatr3/ENSMUSG00000031657.12/protein_coding	277.513	0.254897	0.0677131	3.76437	0.000166968	0.00385379	Heatr3
Ifitm6/ENSMUSG00000059108.3/protein_coding	32.7719	-0.280474	0.0744982	-3.76484	0.000166656	0.00385379	Ifitm6
Lmbr1l/ENSMUSG00000022999.10/protein_coding	194.614	0.267491	0.0710571	3.76445	0.000166918	0.00385379	Lmbr1l
Maob/ENSMUSG00000040147.10/protein_coding	3.43968	-0.258211	0.0685735	-3.76545	0.000166246	0.00385379	Maob
N4bp1/ENSMUSG00000031652.10/protein_coding	584.679	0.271398	0.0720765	3.76541	0.000166273	0.00385379	N4bp1
Pcbp3/ENSMUSG00000001120.11/protein_coding	12.4059	-0.39665	0.105324	-3.766	0.000165881	0.00385379	Pcbp3
Lrrc75a/ENSMUSG00000046417.10/protein_coding	389.171	0.291779	0.0775403	3.76294	0.00016793	0.00385953	Lrrc75a
Slc30a7/ENSMUSG00000054414.3/protein_coding	786.077	0.217185	0.0577139	3.76313	0.000167799	0.00385953	Slc30a7
Vim/ENSMUSG00000026728.5/protein_coding	68.2499	-0.426506	0.113331	-3.76336	0.000167648	0.00385953	Vim
Taok1/ENSMUSG00000017291.9/protein_coding	957.488	0.289554	0.0770225	3.75934	0.000170362	0.0039099	Taok1
Gdpgp1/ENSMUSG00000050973.10/protein_coding	155.384	-0.299073	0.0796826	-3.75331	0.000174516	0.0039996	Gdpgp1
Rpl41/ENSMUSG00000093674.3/protein_coding	487.468	-0.304092	0.081028	-3.75292	0.000174786	0.00400015	Rpl41
Arl4c/ENSMUSG00000049866.8/protein_coding	711.208	0.291552	0.0777747	3.74868	0.000177768	0.00406267	Arl4c
Lgals9/ENSMUSG00000001123.11/protein_coding	3723.87	0.19285	0.0514672	3.74705	0.000178928	0.00408342	Lgals9
Dlat/ENSMUSG00000000168.5/protein_coding	405.839	0.202445	0.0540507	3.74546	0.000180063	0.00410357	Dlat
Spcs1/ENSMUSG00000021917.10/protein_coding	873.684	-0.210228	0.0562508	-3.73733	0.000185985	0.00423259	Spcs1
Gm20628/ENSMUSG00000093656.1/antisense	34.6921	-0.41546	0.111177	-3.73692	0.000186286	0.0042335	Gm20628
Sh3bgrl3/ENSMUSG00000028843.8/protein_coding	2104.95	0.210158	0.0562537	3.73589	0.000187051	0.00424496	Sh3bgrl3
Pdlim4/ENSMUSG00000020388.8/protein_coding	864.516	0.166865	0.0447108	3.73208	0.000189903	0.00430367	Pdlim4
Tnni2/ENSMUSG00000031097.10/protein_coding	76.3381	-0.389688	0.104437	-3.73132	0.000190477	0.00431068	Tnni2
Atxn2/ENSMUSG00000042605.11/protein_coding	803.826	0.19925	0.0534116	3.73046	0.000191132	0.00431947	Atxn2
Clec4d/ENSMUSG00000030144.2/protein_coding	2.95761	-0.223234	0.0598685	-3.72875	0.000192433	0.00434283	Clec4d
Abl2/ENSMUSG00000026596.9/protein_coding	161.42	0.351786	0.0943869	3.72706	0.000193723	0.00436588	Abl2
Sh3kbp1/ENSMUSG00000040990.13/protein_coding	1552.84	0.174764	0.0469014	3.72621	0.000194379	0.0043746	Sh3kbp1
Cxcr3/ENSMUSG00000050232.6/protein_coding	30.7637	-0.419516	0.112695	-3.72259	0.000197188	0.00443168	Cxcr3
Dgat2/ENSMUSG00000030747.4/protein_coding	17.6547	-0.384536	0.10332	-3.72178	0.000197821	0.00443978	Dgat2
Pfkfb3/ENSMUSG00000026773.15/protein_coding	1406.68	0.249607	0.0670787	3.7211	0.000198355	0.00444563	Pfkfb3
Cldn15/ENSMUSG00000001739.10/protein_coding	1.94635	-0.200636	0.0539771	-3.71706	0.000201551	0.00451102	Cldn15
Gnptg/ENSMUSG00000035521.9/protein_coding	583.711	-0.236069	0.063539	-3.71535	0.000202923	0.00453548	Gnptg
Trem2/ENSMUSG00000023992.10/protein_coding	12174.6	-0.211276	0.0568715	-3.71498	0.000203222	0.00453594	Trem2
Gpatch8/ENSMUSG00000034621.10/protein_coding	717.564	0.207475	0.0558599	3.71419	0.000203853	0.00453755	Gpatch8
Rab44/ENSMUSG00000064147.6/protein_coding	7.77458	-0.195171	0.0525446	-3.71439	0.000203696	0.00453755	Rab44
Ccl6/ENSMUSG00000018927.3/protein_coding	1929.02	-0.290267	0.0781763	-3.71298	0.000204832	0.00455311	Ccl6
Rpl34/ENSMUSG00000062006.8/protein_coding	339.741	-0.321999	0.0867572	-3.71149	0.00020604	0.00456746	Rpl34
Tpd52l1/ENSMUSG00000000296.7/protein_coding	2.57245	-0.244724	0.0659351	-3.71158	0.000205967	0.00456746	Tpd52l1
Ngp/ENSMUSG00000032484.7/protein_coding	887.237	-0.173014	0.0466342	-3.71002	0.000207244	0.00458165	Ngp
Nt5e/ENSMUSG00000032420.7/protein_coding	3.88179	-0.264189	0.0712086	-3.71007	0.000207203	0.00458165	Nt5e
Cntnap2/ENSMUSG00000039419.12/protein_coding	1.13932	-0.177587	0.0478748	-3.7094	0.000207748	0.00458654	Cntnap2
Creg1/ENSMUSG00000040713.8/protein_coding	4146.4	-0.209934	0.0566071	-3.70861	0.000208401	0.00459471	Creg1
B3galt4/ENSMUSG00000067370.3/protein_coding	285.496	-0.25135	0.067785	-3.70805	0.000208862	0.00459865	B3galt4
Nr1d2/ENSMUSG00000021775.10/protein_coding	869.606	-0.247808	0.0668848	-3.705	0.000211392	0.00464805	Nr1d2
Man1a/ENSMUSG00000003746.11/protein_coding	2924.75	-0.207493	0.0560092	-3.70462	0.000211712	0.0046488	Man1a
Sh3pxd2a/ENSMUSG00000053617.7/protein_coding	78.3776	0.356737	0.0963928	3.70087	0.000214863	0.00471162	Sh3pxd2a
Idua/ENSMUSG00000033540.14/protein_coding	1411.23	-0.196292	0.0530806	-3.698	0.000217308	0.00475881	Idua
Me1/ENSMUSG00000032418.11/protein_coding	4.63466	-0.288341	0.0781362	-3.69024	0.000224046	0.00489976	Me1
Sf3b6/ENSMUSG00000037361.7/protein_coding	368.525	-0.277802	0.0753043	-3.68906	0.000225086	0.00491589	Sf3b6
Amz1/ENSMUSG00000050022.12/protein_coding	946.779	0.250575	0.067942	3.68808	0.000225956	0.00492167	Amz1
Syngr2/ENSMUSG00000048277.11/protein_coding	4036.37	0.193775	0.0525391	3.68821	0.000225839	0.00492167	Syngr2
Krt18/ENSMUSG00000023043.6/protein_coding	2.50035	-0.213243	0.0578704	-3.68484	0.000228843	0.00497786	Krt18
Ms4a4b/ENSMUSG00000056290.11/protein_coding	10.0639	-0.324435	0.0880684	-3.6839	0.00022969	0.00498961	Ms4a4b
Hspa4/ENSMUSG00000020361.9/protein_coding	946.582	0.206114	0.0559582	3.68335	0.000230189	0.00498977	Hspa4
Ptpn1/ENSMUSG00000027540.9/protein_coding	2601.59	0.211679	0.0574713	3.68321	0.000230311	0.00498977	Ptpn1
Ptgr1/ENSMUSG00000028378.6/protein_coding	104.437	0.318749	0.0865511	3.68278	0.000230702	0.00499159	Ptgr1
Pde2a/ENSMUSG00000030653.12/protein_coding	484.737	-0.417269	0.113322	-3.68216	0.000231271	0.00499723	Pde2a
Bsg/ENSMUSG00000023175.11/protein_coding	3464.49	-0.162428	0.0441237	-3.68119	0.000232145	0.00500947	Bsg
Ndfip2/ENSMUSG00000053253.12/protein_coding	1304.04	-0.235522	0.0639888	-3.68067	0.000232622	0.0050131	Ndfip2
Scube1/ENSMUSG00000016763.10/protein_coding	84.4424	0.384771	0.104796	3.67163	0.000241012	0.00518702	Scube1
Pltp/ENSMUSG00000017754.9/protein_coding	97.7695	-0.38652	0.105329	-3.66965	0.000242882	0.00522035	Pltp
Slc7a10/ENSMUSG00000030495.8/protein_coding	3.6611	-0.258085	0.070353	-3.66842	0.000244051	0.00523854	Slc7a10
Chd8/ENSMUSG00000053754.9/protein_coding	388.12	0.277516	0.0757033	3.66584	0.00024653	0.00528479	Chd8
Itga1/ENSMUSG00000042284.9/protein_coding	2.42193	-0.222304	0.0606853	-3.66323	0.000249051	0.0053318	Itga1
RP24-541A5.1/ENSMUSG00000103976.1/TEC	18.3216	0.392632	0.107235	3.66141	0.000250827	0.0053557	RP24-541A5.1
Tpp2/ENSMUSG00000041763.10/protein_coding	1269.62	0.184919	0.050503	3.66155	0.000250694	0.0053557	Tpp2
Myeov2/ENSMUSG00000073616.6/protein_coding	354.134	-0.318179	0.0869442	-3.65958	0.000252633	0.00537307	Myeov2
Trrap/ENSMUSG00000045482.11/protein_coding	493.297	0.262409	0.0716982	3.6599	0.000252312	0.00537307	Trrap
Tyrobp/ENSMUSG00000030579.9/protein_coding	9235.03	-0.233059	0.0636836	-3.65963	0.000252578	0.00537307	Tyrobp
Kcnk1/ENSMUSG00000033998.8/protein_coding	2.77751	-0.25592	0.0699718	-3.65747	0.000254717	0.00541033	Kcnk1
Zfp931/ENSMUSG00000078861.4/protein_coding	111.374	-0.358612	0.0980604	-3.65705	0.000255132	0.00541205	Zfp931
Klf10/ENSMUSG00000037465.9/protein_coding	262.023	0.289386	0.0791486	3.65624	0.000255939	0.00542211	Klf10
Map7d1/ENSMUSG00000028849.13/protein_coding	1308.58	0.199951	0.0547484	3.65219	0.000260018	0.00549419	Map7d1
Tekt1/ENSMUSG00000020799.12/protein_coding	0.952919	-0.173441	0.0474858	-3.65247	0.000259731	0.00549419	Tekt1
Nmnat3/ENSMUSG00000032456.9/protein_coding	83.6341	-0.366266	0.100308	-3.65142	0.000260798	0.00550351	Nmnat3
Smurf1/ENSMUSG00000038780.10/protein_coding	1430.63	0.184058	0.0504311	3.64969	0.000262555	0.00553341	Smurf1
Epm2aip1/ENSMUSG00000046785.7/protein_coding	433.214	-0.28866	0.0791443	-3.64727	0.000265046	0.00557145	Epm2aip1
Hexa/ENSMUSG00000025232.7/protein_coding	11546.7	-0.132568	0.0363452	-3.64746	0.000264845	0.00557145	Hexa
Irak2/ENSMUSG00000060477.10/protein_coding	1721.6	0.168977	0.0463505	3.64563	0.000266734	0.00559968	Irak2
Evl/ENSMUSG00000021262.10/protein_coding	1998.82	0.162365	0.0445606	3.64368	0.000268765	0.0056278	Evl
Icos/ENSMUSG00000026009.10/protein_coding	20.1072	-0.408738	0.112176	-3.64373	0.000268719	0.0056278	Icos
Txndc16/ENSMUSG00000021830.9/protein_coding	532.723	-0.232338	0.0637804	-3.64279	0.000269703	0.00564017	Txndc16
H2-M3/ENSMUSG00000016206.6/protein_coding	621.98	-0.274732	0.0754364	-3.6419	0.000270628	0.00565223	H2-M3
Rhoa/ENSMUSG00000007815.9/protein_coding	3709.75	0.270574	0.0743129	3.64101	0.000271568	0.00566458	Rhoa
Arhgdia/ENSMUSG00000025132.9/protein_coding	4378.45	0.174999	0.0480734	3.64025	0.00027237	0.00567237	Arhgdia
Mbp/ENSMUSG00000041607.12/protein_coding	483.475	-0.230781	0.0634014	-3.64	0.00027264	0.00567237	Mbp
Hcls1/ENSMUSG00000022831.10/protein_coding	1647.28	0.211917	0.0582367	3.63889	0.000273811	0.00568947	Hcls1
Vipr1/ENSMUSG00000032528.4/protein_coding	167.625	0.297559	0.0817856	3.63828	0.000274463	0.00569573	Vipr1
Nlrp1b/ENSMUSG00000070390.8/protein_coding	212.901	0.320981	0.0882425	3.63748	0.000275313	0.00570608	Nlrp1b
2410015M20Rik/ENSMUSG00000049760.5/protein_coding	166.133	-0.32786	0.0901833	-3.63549	0.000277457	0.0057399	2410015M20Rik
Mrpl14/ENSMUSG00000023939.7/protein_coding	125.715	-0.355646	0.0978313	-3.63531	0.000277652	0.0057399	Mrpl14
Prdx2/ENSMUSG00000005161.11/protein_coding	663.237	-0.243113	0.066892	-3.63441	0.000278621	0.00575263	Prdx2
Adap2/ENSMUSG00000020709.11/protein_coding	1879.68	0.194611	0.0535545	3.63388	0.000279189	0.00575703	Adap2
Noa1/ENSMUSG00000036285.10/protein_coding	173.343	0.260924	0.0718144	3.63331	0.000279809	0.0057625	Noa1
Atp11b/ENSMUSG00000037400.12/protein_coding	608.294	-0.211712	0.0582752	-3.63297	0.000280176	0.00576275	Atp11b
Gna13/ENSMUSG00000020611.10/protein_coding	2769.43	0.173596	0.0478577	3.62733	0.000286362	0.00587512	Gna13
Vill/ENSMUSG00000038775.10/protein_coding	21.2003	-0.401632	0.110716	-3.6276	0.000286065	0.00587512	Vill
Rps3/ENSMUSG00000030744.8/protein_coding	1257.15	-0.268723	0.0740973	-3.62662	0.000287155	0.00588397	Rps3
Gm15800/ENSMUSG00000042744.12/protein_coding	305.225	0.294599	0.0812508	3.6258	0.000288073	0.00589533	Gm15800
Srpk3/ENSMUSG00000002007.5/protein_coding	695.023	-0.322017	0.0888504	-3.62427	0.000289784	0.00592289	Srpk3
Inhba/ENSMUSG00000041324.9/protein_coding	1.17754	-0.176583	0.0487561	-3.62176	0.000292608	0.00597309	Inhba
Gnai2/ENSMUSG00000032562.9/protein_coding	7589.77	0.171753	0.0474334	3.62092	0.000293558	0.00598498	Gnai2
Epn3/ENSMUSG00000010080.11/protein_coding	4.07309	-0.270627	0.074773	-3.61931	0.00029539	0.00601477	Epn3
Atp5h/ENSMUSG00000034566.6/protein_coding	499.843	-0.216425	0.0598084	-3.61863	0.000296163	0.00601543	Atp5h
Mfsd11/ENSMUSG00000020818.12/protein_coding	1336.92	-0.161919	0.0447431	-3.61887	0.000295894	0.00601543	Mfsd11
Rbx1/ENSMUSG00000022400.8/protein_coding	832.627	-0.205941	0.0569407	-3.61675	0.000298322	0.00605173	Rbx1
Krt8/ENSMUSG00000049382.9/protein_coding	1.24853	-0.179704	0.0497245	-3.614	0.000301512	0.0061088	Krt8
Alkbh5/ENSMUSG00000042650.3/protein_coding	572.72	0.360071	0.0996856	3.61207	0.000303762	0.00613732	Alkbh5
Itm2a/ENSMUSG00000031239.5/protein_coding	3.62158	-0.258203	0.0714882	-3.61182	0.000304052	0.00613732	Itm2a
Ms4a3/ENSMUSG00000024681.7/protein_coding	1.08849	-0.168898	0.0467572	-3.61224	0.000303566	0.00613732	Ms4a3
Gabarapl2/ENSMUSG00000031950.7/protein_coding	928.115	-0.222213	0.0615564	-3.60991	0.000306302	0.00617507	Gabarapl2
Gm12166/ENSMUSG00000069899.3/protein_coding	945.218	-0.230907	0.0639742	-3.60938	0.000306934	0.00618014	Gm12166
Arid2/ENSMUSG00000033237.14/protein_coding	745.774	0.282221	0.0782183	3.60812	0.000308421	0.00619473	Arid2
Prkar2b/ENSMUSG00000002997.11/protein_coding	7.93228	-0.323791	0.0897372	-3.60821	0.000308316	0.00619473	Prkar2b
Cyb561d2/ENSMUSG00000037190.8/protein_coding	261.924	-0.266203	0.0738316	-3.60554	0.000311505	0.0062484	Cyb561d2
Rpl36al/ENSMUSG00000049751.6/protein_coding	500.94	-0.230557	0.0639505	-3.60524	0.000311862	0.0062484	Rpl36al
2010107E04Rik/ENSMUSG00000021290.5/protein_coding	200.092	-0.306781	0.0851028	-3.60483	0.000312352	0.0062505	2010107E04Rik
Ankrd33b/ENSMUSG00000022237.12/protein_coding	4.25726	-0.241512	0.0670122	-3.604	0.000313359	0.00625525	Ankrd33b
Top2b/ENSMUSG00000017485.6/protein_coding	701.183	0.20838	0.0578141	3.60431	0.000312979	0.00625525	Top2b
Etfb/ENSMUSG00000004610.3/protein_coding	364.503	-0.250732	0.0695976	-3.6026	0.000315054	0.00627366	Etfb
Smim14/ENSMUSG00000037822.8/protein_coding	957.818	-0.151143	0.0419517	-3.60279	0.000314819	0.00627366	Smim14
S1pr1/ENSMUSG00000045092.7/protein_coding	919.823	-0.289049	0.0802474	-3.60197	0.000315816	0.00628115	S1pr1
Xcl1/ENSMUSG00000026573.7/protein_coding	1.42794	-0.19593	0.0544325	-3.5995	0.000318833	0.00633339	Xcl1
Zfp433/ENSMUSG00000096795.1/protein_coding	228.974	-0.296376	0.0823518	-3.5989	0.00031956	0.00634008	Zfp433
Prdx1/ENSMUSG00000028691.8/protein_coding	1861.53	-0.215008	0.0597745	-3.59699	0.000321924	0.00637921	Prdx1
Rcor3/ENSMUSG00000037395.11/protein_coding	186.348	0.284646	0.0791419	3.59665	0.00032234	0.00637966	Rcor3
Ear6/ENSMUSG00000062148.6/protein_coding	2.17959	-0.164624	0.0457893	-3.59524	0.000324087	0.00640643	Ear6
Gm10644/ENSMUSG00000074219.2/protein_coding	55.9444	-0.387007	0.107671	-3.59434	0.000325213	0.00642088	Gm10644
Atp6v1a/ENSMUSG00000052459.9/protein_coding	715.071	-0.23212	0.0646256	-3.59176	0.000328452	0.00646129	Atp6v1a
Rap2a/ENSMUSG00000051615.9/protein_coding	810.09	0.200396	0.0557927	3.5918	0.000328404	0.00646129	Rap2a
Tuba8/ENSMUSG00000030137.7/protein_coding	1.57261	-0.181958	0.0506527	-3.59226	0.000327818	0.00646129	Tuba8
Slc37a1/ENSMUSG00000024036.11/protein_coding	37.8714	-0.391548	0.109069	-3.58989	0.000330812	0.00649983	Slc37a1
Exoc6/ENSMUSG00000053799.6/protein_coding	552.897	0.230457	0.0642022	3.58954	0.000331262	0.00650081	Exoc6
Atp6v1f/ENSMUSG00000004285.8/protein_coding	834.236	-0.255731	0.0713032	-3.58654	0.000335098	0.00656025	Atp6v1f
Wls/ENSMUSG00000028173.6/protein_coding	2001.8	-0.156757	0.0437035	-3.58683	0.000334724	0.00656025	Wls
Sall3/ENSMUSG00000024565.8/protein_coding	1685.82	0.287433	0.0802238	3.58289	0.000339811	0.00664451	Sall3
Coro2a/ENSMUSG00000028337.10/protein_coding	271.188	0.344786	0.0962669	3.58156	0.000341545	0.00666318	Coro2a
Irf8/ENSMUSG00000041515.5/protein_coding	6169.07	0.133363	0.0372362	3.58153	0.000341586	0.00666318	Irf8
Hpse/ENSMUSG00000035273.10/protein_coding	19.7076	-0.394676	0.110211	-3.58109	0.000342163	0.00666644	Hpse
Apba1/ENSMUSG00000024897.8/protein_coding	315.197	0.310122	0.086621	3.58022	0.000343309	0.00668075	Apba1
Pdcd1/ENSMUSG00000026285.7/protein_coding	71.1199	0.391033	0.109248	3.57931	0.000344503	0.00669597	Pdcd1
Itm2b/ENSMUSG00000022108.7/protein_coding	43877.7	-0.157237	0.0439386	-3.57857	0.000345481	0.00670696	Itm2b
Sqle/ENSMUSG00000022351.10/protein_coding	32.9315	-0.400253	0.111913	-3.57646	0.000348274	0.00675312	Sqle
Slc31a1/ENSMUSG00000066150.8/protein_coding	906.81	-0.183215	0.051236	-3.57591	0.000349007	0.00675925	Slc31a1
Isca2/ENSMUSG00000021241.6/protein_coding	365.54	-0.299263	0.0837376	-3.57382	0.000351808	0.0068054	Isca2
Lonrf3/ENSMUSG00000016239.7/protein_coding	125.893	0.292158	0.0818088	3.57123	0.000355314	0.00686504	Lonrf3
Naip6/ENSMUSG00000078942.6/protein_coding	435.9	0.230104	0.0644966	3.56769	0.000360146	0.00694189	Naip6
Pld4/ENSMUSG00000052160.6/protein_coding	13566.7	0.150313	0.0421295	3.56788	0.000359879	0.00694189	Pld4
Zfp606/ENSMUSG00000030386.13/protein_coding	482.591	-0.19178	0.0537681	-3.56679	0.000361375	0.00695732	Zfp606
Serpinb8/ENSMUSG00000026315.9/protein_coding	17.6072	-0.386743	0.108451	-3.56607	0.00036238	0.00696842	Serpinb8
Eps15l1/ENSMUSG00000006276.9/protein_coding	382.799	0.232189	0.065126	3.56523	0.000363538	0.00698242	Eps15l1
Cldn2/ENSMUSG00000047230.6/protein_coding	3.34217	-0.22532	0.0632706	-3.56122	0.000369142	0.00708169	Cldn2
Zswim4/ENSMUSG00000035671.5/protein_coding	255.325	-0.307028	0.0862426	-3.56005	0.000370779	0.0071047	Zswim4
Med15/ENSMUSG00000012114.12/protein_coding	589.947	0.234838	0.065985	3.55896	0.000372328	0.00712598	Med15
Ifngr2/ENSMUSG00000022965.7/protein_coding	2344.77	0.15791	0.0443849	3.55774	0.000374055	0.0071422	Ifngr2
Ndufb6/ENSMUSG00000071014.6/protein_coding	196.749	-0.278833	0.0783672	-3.55803	0.000373652	0.0071422	Ndufb6
Top1/ENSMUSG00000070544.6/protein_coding	655.689	0.283349	0.0796694	3.55656	0.000375741	0.00716597	Top1
Bop1/ENSMUSG00000022557.10/protein_coding	382.641	0.223672	0.06296	3.5526	0.000381449	0.00724085	Bop1
Ehbp1l1/ENSMUSG00000024937.10/protein_coding	1150.25	0.2227	0.0626768	3.55315	0.000380644	0.00724085	Ehbp1l1
Pid1/ENSMUSG00000045658.12/protein_coding	1208.74	-0.237375	0.0668127	-3.55285	0.000381087	0.00724085	Pid1
Rdm1/ENSMUSG00000010362.5/protein_coding	137.981	-0.314789	0.0885868	-3.55345	0.00038021	0.00724085	Rdm1
Hacl1/ENSMUSG00000021884.13/protein_coding	107.864	-0.311368	0.0876596	-3.55201	0.000382296	0.00724846	Hacl1
Hist1h4h/ENSMUSG00000060981.6/protein_coding	14.4564	-0.393269	0.110733	-3.5515	0.000383035	0.00725401	Hist1h4h
Sepp1/ENSMUSG00000064373.7/protein_coding	26612.6	-0.260667	0.0734242	-3.55015	0.000385009	0.0072829	Sepp1
Macf1/ENSMUSG00000028649.13/protein_coding	4487.21	0.299635	0.084481	3.54677	0.00038998	0.00735126	Macf1
Tbc1d2/ENSMUSG00000039813.10/protein_coding	8.66389	-0.356677	0.100561	-3.54687	0.000389833	0.00735126	Tbc1d2
Zyg11b/ENSMUSG00000034636.9/protein_coding	678.458	0.236619	0.0667115	3.5469	0.000389793	0.00735126	Zyg11b
Med13l/ENSMUSG00000018076.9/protein_coding	777.842	0.274321	0.077352	3.5464	0.00039053	0.0073531	Med13l
Efcab1/ENSMUSG00000068617.4/protein_coding	1.41679	-0.19179	0.0541024	-3.54495	0.000392688	0.00738517	Efcab1
Zfp236/ENSMUSG00000041258.12/protein_coding	243.948	0.304202	0.0858208	3.54461	0.000393191	0.00738608	Zfp236
Cyp51/ENSMUSG00000001467.4/protein_coding	173.586	-0.297745	0.084024	-3.54357	0.000394752	0.0073983	Cyp51
Mrps33/ENSMUSG00000029918.8/protein_coding	363.846	-0.239972	0.0677165	-3.54377	0.000394449	0.0073983	Mrps33
Mrpl41/ENSMUSG00000036850.4/protein_coding	163.372	-0.339362	0.09584	-3.54092	0.000398734	0.00746432	Mrpl41
Stard9/ENSMUSG00000033705.12/protein_coding	1439.9	0.235509	0.0665457	3.53906	0.00040156	0.00750858	Stard9
Tec/ENSMUSG00000029217.12/protein_coding	804.439	0.178521	0.050448	3.5387	0.000402096	0.00750994	Tec
Fxyd5/ENSMUSG00000009687.10/protein_coding	167.43	-0.395369	0.111846	-3.53495	0.000407846	0.0076086	Fxyd5
Tm2d2/ENSMUSG00000031556.5/protein_coding	1086.35	-0.217163	0.0615406	-3.52878	0.000417481	0.00777941	Tm2d2
Nol4l/ENSMUSG00000061411.8/protein_coding	435.312	0.267433	0.0758244	3.52701	0.00042028	0.00782261	Nol4l
Rnase10/ENSMUSG00000021872.7/protein_coding	46.2779	-0.379291	0.107618	-3.52442	0.000424406	0.00787647	Rnase10
Rpl9/ENSMUSG00000047215.10/protein_coding	571.078	-0.301226	0.0854693	-3.52437	0.00042449	0.00787647	Rpl9
Spin1/ENSMUSG00000021395.10/protein_coding	731.942	0.195812	0.0555607	3.52428	0.000424628	0.00787647	Spin1
Brd4/ENSMUSG00000024002.12/protein_coding	1052	0.240088	0.0681756	3.52161	0.000428929	0.00794717	Brd4
Hint1/ENSMUSG00000020267.6/protein_coding	309.38	-0.275035	0.0781515	-3.51925	0.000432771	0.00800922	Hint1
Gcnt2/ENSMUSG00000021360.11/protein_coding	563.958	0.277665	0.0789295	3.51789	0.00043499	0.008032	Gcnt2
Srp14/ENSMUSG00000009549.10/protein_coding	481.737	-0.229222	0.0651563	-3.51803	0.000434765	0.008032	Srp14
Pdgfa/ENSMUSG00000025856.11/protein_coding	154.783	0.284562	0.0809071	3.51715	0.000436215	0.00804547	Pdgfa
Gdpd5/ENSMUSG00000035314.8/protein_coding	80.9834	0.332611	0.094605	3.51579	0.000438456	0.00806251	Gdpd5
Gm27168/ENSMUSG00000099162.1/lincRNA	7.80593	-0.366033	0.104114	-3.51568	0.000438628	0.00806251	Gm27168
Gpr34/ENSMUSG00000040229.7/protein_coding	34069	-0.252408	0.0717859	-3.51612	0.000437897	0.00806251	Gpr34
Ccdc90b/ENSMUSG00000030613.9/protein_coding	296.65	-0.287501	0.0817981	-3.51476	0.000440148	0.00808131	Ccdc90b
Csf2rb2/ENSMUSG00000071714.5/protein_coding	650.598	0.283055	0.0805731	3.51302	0.000443048	0.00812506	Csf2rb2
Gm26773/ENSMUSG00000097358.1/lincRNA	9.29458	-0.373792	0.106411	-3.51273	0.000443531	0.00812506	Gm26773
Sae1/ENSMUSG00000052833.8/protein_coding	408.149	0.230862	0.0657394	3.51178	0.000445121	0.00813586	Sae1
Sdc4/ENSMUSG00000017009.3/protein_coding	165.075	-0.315429	0.0898187	-3.51184	0.000445017	0.00813586	Sdc4
Haus2/ENSMUSG00000027285.9/protein_coding	189.528	-0.256082	0.0729377	-3.51097	0.000446476	0.00815145	Haus2
Ddb2/ENSMUSG00000002109.10/protein_coding	162.593	-0.295139	0.0840729	-3.51052	0.000447239	0.00815621	Ddb2
Arid1a/ENSMUSG00000007880.12/protein_coding	1396.67	0.299667	0.0854085	3.50864	0.000450412	0.00820487	Arid1a
Mospd1/ENSMUSG00000023074.7/protein_coding	151.097	-0.265027	0.0755503	-3.50796	0.000451555	0.00820968	Mospd1
Oas2/ENSMUSG00000032690.12/protein_coding	39.5704	-0.397376	0.113281	-3.50788	0.000451686	0.00820968	Oas2
Prox1/ENSMUSG00000010175.9/protein_coding	194.605	0.313763	0.0894909	3.50609	0.000454743	0.00824678	Prox1
Zmym2/ENSMUSG00000021945.8/protein_coding	805.457	0.191692	0.0546723	3.50621	0.000454536	0.00824678	Zmym2
Kmt2d/ENSMUSG00000048154.12/protein_coding	852.875	0.333189	0.0950959	3.50372	0.000458814	0.00831134	Kmt2d
Kmt2c/ENSMUSG00000038056.11/protein_coding	1242.42	0.266269	0.0760356	3.5019	0.000461962	0.00835903	Kmt2c
Peg3/ENSMUSG00000002265.11/protein_coding	5.67372	-0.303861	0.0867823	-3.50142	0.000462778	0.0083645	Peg3
Ctsb/ENSMUSG00000021939.7/protein_coding	40431	-0.164937	0.0471477	-3.4983	0.000468229	0.00845362	Ctsb
Cd300lb/ENSMUSG00000063193.6/protein_coding	82.9323	-0.370446	0.105992	-3.49503	0.000474016	0.00854859	Cd300lb
Gtf2h5/ENSMUSG00000034345.10/protein_coding	178.433	-0.262456	0.0751126	-3.49418	0.000475528	0.00855686	Gtf2h5
Nfia/ENSMUSG00000028565.14/protein_coding	401.154	0.270159	0.0773165	3.49419	0.000475503	0.00855686	Nfia
Egfl7/ENSMUSG00000026921.14/protein_coding	14.2668	-0.366025	0.104883	-3.48984	0.000483302	0.00868715	Egfl7
Sumo3/ENSMUSG00000020265.11/protein_coding	945.245	-0.178471	0.0511482	-3.48928	0.000484318	0.00869577	Sumo3
D7Ertd715e/ENSMUSG00000100826.2/processed_transcript	68.9194	0.345922	0.099164	3.48839	0.000485943	0.00871532	D7Ertd715e
Fam69b/ENSMUSG00000036186.5/protein_coding	17.4546	-0.394911	0.11323	-3.48769	0.000487208	0.00872839	Fam69b
Clec4n/ENSMUSG00000023349.10/protein_coding	28.5889	-0.392838	0.112648	-3.48731	0.000487909	0.00873131	Clec4n
Dync1h1/ENSMUSG00000018707.9/protein_coding	1089.42	0.321516	0.0922353	3.48582	0.000490629	0.00877033	Dync1h1
Tnfsf8/ENSMUSG00000028362.2/protein_coding	31.2788	0.39204	0.112504	3.48467	0.00049275	0.00879856	Tnfsf8
Emr1/ENSMUSG00000004730.10/protein_coding	5837.34	-0.214856	0.0616811	-3.48334	0.000495205	0.00882484	Emr1
Fam96a/ENSMUSG00000032381.5/protein_coding	443.965	-0.303604	0.0871602	-3.48328	0.000495308	0.00882484	Fam96a
Fam26f/ENSMUSG00000046031.6/protein_coding	89.5464	-0.308867	0.0887171	-3.48148	0.000498649	0.00885524	Fam26f
Kdm1a/ENSMUSG00000036940.11/protein_coding	520.073	0.164885	0.0473533	3.48201	0.000497669	0.00885524	Kdm1a
Zfp746/ENSMUSG00000057691.6/protein_coding	648.101	0.201068	0.0577499	3.4817	0.000498232	0.00885524	Zfp746
Iqub/ENSMUSG00000046192.4/protein_coding	1.72708	-0.187355	0.0538448	-3.47953	0.00050229	0.00891016	Iqub
Pum1/ENSMUSG00000028580.11/protein_coding	1314.62	0.208763	0.0600059	3.47904	0.000503205	0.00891666	Pum1
Bin1/ENSMUSG00000024381.11/protein_coding	6104.3	0.174725	0.0502333	3.47827	0.000504669	0.00893286	Bin1
Polr1d/ENSMUSG00000029642.7/protein_coding	344.634	-0.204233	0.0587351	-3.47719	0.000506703	0.0089591	Polr1d
Mrps28/ENSMUSG00000040269.5/protein_coding	100.406	-0.303223	0.0872385	-3.4758	0.000509336	0.00899587	Mrps28
Pgrmc1/ENSMUSG00000006373.10/protein_coding	979.591	-0.279791	0.0805082	-3.4753	0.000510277	0.0090027	Pgrmc1
Shisa7/ENSMUSG00000053550.9/protein_coding	17.2256	0.37589	0.108176	3.4748	0.000511228	0.0090097	Shisa7
Dab2/ENSMUSG00000022150.12/protein_coding	588.833	-0.334933	0.096441	-3.47293	0.000514802	0.00906285	Dab2
Zdhhc9/ENSMUSG00000036985.8/protein_coding	1221.04	0.180739	0.0520541	3.47214	0.000516326	0.00907986	Zdhhc9
Nme2/ENSMUSG00000020857.7/protein_coding	293.676	-0.29464	0.0848764	-3.4714	0.000517753	0.00909511	Nme2
Ubtf/ENSMUSG00000020923.13/protein_coding	778.526	0.182921	0.0527225	3.46951	0.00052141	0.00914945	Ubtf
Atf7/ENSMUSG00000099083.3/protein_coding	877.601	0.224276	0.0646552	3.4688	0.000522779	0.00916358	Atf7
Dcaf12l1/ENSMUSG00000045284.5/protein_coding	3.39692	-0.232239	0.0669811	-3.46723	0.000525845	0.00919747	Dcaf12l1
Otud1/ENSMUSG00000043415.5/protein_coding	659.639	0.296608	0.0855444	3.4673	0.00052571	0.00919747	Otud1
Slco1a4/ENSMUSG00000030237.10/protein_coding	1.99385	-0.202031	0.0582765	-3.46676	0.000526769	0.00920373	Slco1a4
Chst10/ENSMUSG00000026080.9/protein_coding	56.9766	-0.381197	0.110003	-3.46533	0.000529578	0.00924287	Chst10
Selk/ENSMUSG00000042682.8/protein_coding	1375.63	-0.202406	0.058415	-3.46496	0.000530304	0.00924561	Selk
Usp53/ENSMUSG00000039701.7/protein_coding	13.8651	-0.380634	0.109912	-3.46308	0.000534038	0.00930073	Usp53
Ankrd37/ENSMUSG00000050914.11/protein_coding	21.8382	-0.392325	0.113312	-3.46233	0.000535511	0.00931639	Ankrd37
Gatad2a/ENSMUSG00000036180.10/protein_coding	871.677	0.189594	0.0548234	3.45828	0.000543646	0.00944781	Gatad2a
Ccar1/ENSMUSG00000020074.6/protein_coding	612.106	0.174078	0.050432	3.45173	0.00055701	0.0096491	Ccar1
P2rx1/ENSMUSG00000020787.10/protein_coding	183.952	-0.303495	0.0879142	-3.45218	0.000556081	0.0096491	P2rx1
Susd3/ENSMUSG00000021384.10/protein_coding	3722.78	-0.256462	0.0742991	-3.45175	0.000556957	0.0096491	Susd3
Rasa4/ENSMUSG00000004952.9/protein_coding	1799.28	0.216062	0.0626095	3.45095	0.000558623	0.00966674	Rasa4
Zfp74/ENSMUSG00000059975.10/protein_coding	212.519	0.276482	0.0801429	3.44986	0.000560884	0.00969554	Zfp74
Cds2/ENSMUSG00000058793.10/protein_coding	1128.42	0.269272	0.0780684	3.44918	0.000562293	0.00970957	Cds2
Gas6/ENSMUSG00000031451.5/protein_coding	2403.23	-0.24645	0.0715437	-3.44475	0.000571592	0.00985965	Gas6
Gm3667/ENSMUSG00000090691.3/protein_coding	80.7672	-0.347981	0.101045	-3.44382	0.000573549	0.00987246	Gm3667
Itpripl2/ENSMUSG00000095115.1/protein_coding	651.273	0.280792	0.0815345	3.44384	0.000573518	0.00987246	Itpripl2
Rab34/ENSMUSG00000002059.13/protein_coding	171.581	-0.282786	0.0821379	-3.44283	0.000575667	0.00989843	Rab34
Mrpl33/ENSMUSG00000029142.10/protein_coding	311.511	-0.274728	0.0798229	-3.44172	0.000578035	0.00992864	Mrpl33
Mpzl3/ENSMUSG00000070305.6/protein_coding	7.32734	-0.303131	0.0881133	-3.44024	0.000581202	0.00997249	Mpzl3
Extl3/ENSMUSG00000021978.8/protein_coding	3997.5	0.234124	0.06808	3.43896	0.000583958	0.010003	Extl3
Usp31/ENSMUSG00000063317.6/protein_coding	143.735	0.326755	0.0950191	3.43884	0.000584213	0.010003	Usp31
Tvp23b/ENSMUSG00000014177.6/protein_coding	579.333	-0.219925	0.0640001	-3.43632	0.000589681	0.010086	Tvp23b
Phldb1/ENSMUSG00000048537.11/protein_coding	51.7781	0.387352	0.112804	3.43385	0.000595079	0.0101677	Phldb1
Leprel4/ENSMUSG00000006931.11/protein_coding	49.632	-0.355698	0.103623	-3.43262	0.000597787	0.0101925	Leprel4
Me3/ENSMUSG00000030621.13/protein_coding	1.16629	-0.169472	0.0493705	-3.43265	0.00059772	0.0101925	Me3
Rpl19/ENSMUSG00000017404.8/protein_coding	700.7	-0.246354	0.0718251	-3.42992	0.000603764	0.0102836	Rpl19
Gm6472/ENSMUSG00000095597.2/transcribed_processed_pseudogene	20.9707	-0.372144	0.108585	-3.42722	0.000609806	0.0103523	Gm6472
Prim2/ENSMUSG00000026134.11/protein_coding	98.3169	-0.318135	0.0928324	-3.42698	0.000610344	0.0103523	Prim2
Senp6/ENSMUSG00000034252.10/protein_coding	416.33	0.21109	0.0615956	3.42703	0.000610215	0.0103523	Senp6
Tsix/ENSMUSG00000085715.1/antisense	160.998	-0.336604	0.0982132	-3.42728	0.000609654	0.0103523	Tsix
Crlf3/ENSMUSG00000017561.12/protein_coding	1784.84	0.147546	0.0430583	3.42666	0.000611052	0.0103535	Crlf3
AW209491/ENSMUSG00000039182.5/protein_coding	267.435	-0.292282	0.085333	-3.4252	0.000614349	0.0103854	AW209491
Cep350/ENSMUSG00000033671.13/protein_coding	675.436	0.246562	0.0719883	3.42503	0.000614737	0.0103854	Cep350
Tbc1d1/ENSMUSG00000029174.14/protein_coding	381.892	0.230092	0.0671806	3.42498	0.000614854	0.0103854	Tbc1d1
Wdr82/ENSMUSG00000020257.8/protein_coding	479.362	0.264233	0.077206	3.42245	0.000620597	0.0104715	Wdr82
Morf4l1/ENSMUSG00000062270.9/protein_coding	2746.74	-0.184127	0.0538059	-3.42205	0.000621505	0.010476	Morf4l1
Prdx6/ENSMUSG00000026701.11/protein_coding	297.463	-0.208601	0.0609641	-3.4217	0.000622311	0.0104787	Prdx6
Dapp1/ENSMUSG00000028159.10/protein_coding	2359.38	0.175768	0.0513786	3.42103	0.000623849	0.0104937	Dapp1
Nrip1/ENSMUSG00000048490.9/protein_coding	4040.56	0.194395	0.0568367	3.42023	0.000625681	0.0105136	Nrip1
Ctsc/ENSMUSG00000030560.12/protein_coding	10532	0.186084	0.0544536	3.41729	0.000632479	0.0106059	Ctsc
Wdr86/ENSMUSG00000055235.7/protein_coding	2.65734	-0.232633	0.0680714	-3.41748	0.000632045	0.0106059	Wdr86
Synj2/ENSMUSG00000023805.12/protein_coding	121.416	0.35488	0.103884	3.4161	0.000635256	0.0106415	Synj2
Adrbk1/ENSMUSG00000024858.9/protein_coding	3036.53	0.181487	0.0531411	3.4152	0.000637356	0.0106657	Adrbk1
Tmem42/ENSMUSG00000066233.5/protein_coding	102.554	-0.329463	0.0965031	-3.41402	0.000640124	0.010701	Tmem42
Camk2n1/ENSMUSG00000046447.3/protein_coding	134.842	0.317061	0.0929434	3.41134	0.000646453	0.0107957	Camk2n1
Cdk5r1/ENSMUSG00000048895.13/protein_coding	369.964	0.253918	0.0744671	3.4098	0.00065011	0.0108234	Cdk5r1
Fbxl19/ENSMUSG00000030811.10/protein_coding	41.5555	0.37638	0.110371	3.41015	0.000649276	0.0108234	Fbxl19
Pilrb2/ENSMUSG00000066682.7/protein_coding	14.0702	-0.336159	0.0985849	-3.40984	0.000650005	0.0108234	Pilrb2
Zbtb18/ENSMUSG00000063659.7/protein_coding	808.91	0.17793	0.0521923	3.40912	0.000651739	0.0108394	Zbtb18
Brd1/ENSMUSG00000022387.12/protein_coding	698.993	0.210572	0.0617741	3.40874	0.000652629	0.0108431	Brd1
Mthfs/ENSMUSG00000066442.12/protein_coding	331.395	-0.273668	0.0802991	-3.40811	0.000654136	0.0108571	Mthfs
Ndufb5/ENSMUSG00000027673.8/protein_coding	325.06	-0.192212	0.0564217	-3.4067	0.000657539	0.0109024	Ndufb5
Mecp2/ENSMUSG00000031393.12/protein_coding	332.602	0.240081	0.0705364	3.40364	0.000664932	0.0110091	Mecp2
Ncf1/ENSMUSG00000015950.9/protein_coding	5907.43	0.178783	0.0525294	3.40348	0.000665327	0.0110091	Ncf1
BC005537/ENSMUSG00000019132.6/protein_coding	236.729	0.338996	0.0996992	3.40019	0.000673396	0.0111137	BC005537
Hps5/ENSMUSG00000014418.11/protein_coding	681.056	0.195579	0.0575212	3.40013	0.000673544	0.0111137	Hps5
Nptxr/ENSMUSG00000022421.14/protein_coding	86.1848	0.375559	0.110457	3.40006	0.000673704	0.0111137	Nptxr
Agl/ENSMUSG00000033400.10/protein_coding	284.291	0.229491	0.0675507	3.39731	0.00068052	0.0112023	Agl
Eno1/ENSMUSG00000063524.9/protein_coding	4415.05	0.146179	0.0430379	3.39651	0.000682519	0.0112023	Eno1
Gm5617/ENSMUSG00000042293.7/protein_coding	59.9508	-0.356825	0.105051	-3.3967	0.000682045	0.0112023	Gm5617
Saysd1/ENSMUSG00000045107.4/protein_coding	315.783	-0.312445	0.0919838	-3.39674	0.000681945	0.0112023	Saysd1
Spcs3/ENSMUSG00000054408.9/protein_coding	2833.29	-0.215293	0.0633684	-3.39747	0.000680114	0.0112023	Spcs3
Ccdc88a/ENSMUSG00000032740.12/protein_coding	353.609	0.221364	0.065248	3.39265	0.000692191	0.0113381	Ccdc88a
Ophn1/ENSMUSG00000031214.9/protein_coding	2881.78	0.146174	0.0430837	3.39278	0.000691874	0.0113381	Ophn1
Cd53/ENSMUSG00000040747.9/protein_coding	13541.4	-0.180572	0.0532299	-3.39231	0.000693057	0.0113409	Cd53
Bend6/ENSMUSG00000042182.12/protein_coding	371.916	-0.263513	0.077728	-3.3902	0.00069842	0.0113898	Bend6
Dusp11/ENSMUSG00000030002.11/protein_coding	878.859	0.198978	0.0586955	3.39	0.000698916	0.0113898	Dusp11
Pdcd10/ENSMUSG00000027835.7/protein_coding	651.351	-0.270641	0.0798334	-3.39008	0.000698727	0.0113898	Pdcd10
Ppp1r3d/ENSMUSG00000049999.4/protein_coding	264.648	0.248803	0.0733929	3.39001	0.000698892	0.0113898	Ppp1r3d
RP23-392C14.2/ENSMUSG00000103132.1/TEC	11.8397	0.35933	0.106005	3.38975	0.000699552	0.0113898	RP23-392C14.2
Mesdc2/ENSMUSG00000038503.10/protein_coding	921.032	-0.173695	0.051256	-3.38878	0.000702054	0.0114191	Mesdc2
Gm23849/ENSMUSG00000065767.1/snRNA	26.8608	-0.38128	0.112603	-3.38607	0.000709024	0.011475	Gm23849
Gm23971/ENSMUSG00000065251.1/snRNA	26.8608	-0.38128	0.112603	-3.38607	0.000709024	0.011475	Gm23971
Gm24950/ENSMUSG00000064702.1/snRNA	26.8608	-0.38128	0.112603	-3.38607	0.000709024	0.011475	Gm24950
Myo18a/ENSMUSG00000000631.15/protein_coding	1333.26	0.185771	0.054856	3.38652	0.00070784	0.011475	Myo18a
Rnu2-10/ENSMUSG00000065944.1/snRNA	26.8608	-0.38128	0.112603	-3.38607	0.000709024	0.011475	Rnu2-10
Spsb1/ENSMUSG00000039911.9/protein_coding	1639.75	0.221295	0.0653854	3.38447	0.00071316	0.0115305	Spsb1
Osbp2/ENSMUSG00000020435.13/protein_coding	3.09861	-0.250706	0.0741145	-3.38269	0.0007178	0.011594	Osbp2
Kif3c/ENSMUSG00000020668.9/protein_coding	165.798	0.307946	0.0910583	3.38186	0.000719968	0.0116174	Kif3c
Wnk1/ENSMUSG00000045962.12/protein_coding	1632.16	0.251799	0.0744829	3.38062	0.000723217	0.0116583	Wnk1
Med28/ENSMUSG00000015804.10/protein_coding	568.779	-0.246213	0.0728622	-3.37915	0.000727092	0.0117091	Med28
Ncoa6/ENSMUSG00000038369.10/protein_coding	472.904	0.276092	0.0817197	3.37853	0.000728755	0.0117243	Ncoa6
Oaf/ENSMUSG00000032014.5/protein_coding	489.633	-0.232893	0.0689698	-3.37674	0.000733517	0.0117892	Oaf
Rnf145/ENSMUSG00000019189.9/protein_coding	2095.12	0.168257	0.0498324	3.37646	0.000734262	0.0117895	Rnf145
Gtf3c3/ENSMUSG00000041303.7/protein_coding	308.939	-0.216009	0.0640049	-3.37488	0.000738473	0.0118377	Gtf3c3
Tesk1/ENSMUSG00000028458.8/protein_coding	807.803	0.163787	0.0485326	3.37479	0.000738717	0.0118377	Tesk1
Ppm1f/ENSMUSG00000026181.11/protein_coding	1086.34	0.209506	0.0620869	3.37439	0.000739785	0.0118431	Ppm1f
Osm/ENSMUSG00000058755.3/protein_coding	227.865	0.234731	0.0695692	3.37406	0.000740688	0.0118459	Osm
Ctss/ENSMUSG00000038642.6/protein_coding	57804.4	0.155895	0.046225	3.37253	0.000744817	0.0119002	Ctss
Med13/ENSMUSG00000034297.10/protein_coding	678.711	0.262278	0.0777918	3.37154	0.000747491	0.0119221	Med13
Snrk/ENSMUSG00000038145.12/protein_coding	650.933	0.207993	0.0616918	3.37148	0.000747651	0.0119221	Snrk
Ccl8/ENSMUSG00000009185.2/protein_coding	7.4456	-0.327707	0.0972189	-3.37082	0.000749451	0.0119391	Ccl8
Pex7/ENSMUSG00000020003.11/protein_coding	288.848	-0.264694	0.0785601	-3.36932	0.000753532	0.0119923	Pex7
2310001H17Rik/ENSMUSG00000097354.3/lincRNA	11.3317	-0.334298	0.0992402	-3.36857	0.000755585	0.0120132	2310001H17Rik
Pnma2/ENSMUSG00000046204.9/protein_coding	27.2995	-0.381161	0.11328	-3.36478	0.000766049	0.0121565	Pnma2
Ranbp9/ENSMUSG00000038546.8/protein_coding	945.909	0.174638	0.051902	3.36476	0.000766096	0.0121565	Ranbp9
1700025G04Rik/ENSMUSG00000032666.12/protein_coding	38.3239	-0.381037	0.113282	-3.36361	0.000769291	0.0121953	1700025G04Rik
Vwa3a/ENSMUSG00000030889.9/protein_coding	1.06004	-0.169931	0.0505447	-3.36199	0.000773825	0.0122552	Vwa3a
Scd1/ENSMUSG00000037071.2/protein_coding	1.90538	-0.204463	0.0608589	-3.35962	0.000780501	0.0123489	Scd1
Cbx7/ENSMUSG00000053411.12/protein_coding	462.065	-0.251294	0.0748408	-3.35772	0.000785892	0.0124101	Cbx7
Sdhd/ENSMUSG00000000171.4/protein_coding	981.21	-0.266315	0.0793118	-3.35782	0.000785594	0.0124101	Sdhd
Cd300lf/ENSMUSG00000047798.11/protein_coding	48.0208	-0.370785	0.110468	-3.3565	0.000789361	0.0124526	Cd300lf
Nlrc4/ENSMUSG00000039193.7/protein_coding	9.10588	-0.344428	0.102623	-3.35623	0.00079012	0.0124526	Nlrc4
Gna12/ENSMUSG00000000149.6/protein_coding	7486.4	0.163424	0.0487	3.35573	0.000791572	0.0124634	Gna12
Atp1b2/ENSMUSG00000041329.9/protein_coding	5.45958	-0.313427	0.0934206	-3.35502	0.000793605	0.0124833	Atp1b2
Uqcc3/ENSMUSG00000071654.5/protein_coding	177.894	-0.231995	0.0691571	-3.35461	0.000794765	0.0124895	Uqcc3
Rbm7/ENSMUSG00000042396.9/protein_coding	889.489	-0.267422	0.0797714	-3.35235	0.000801285	0.0125798	Rbm7
Zc3h18/ENSMUSG00000017478.11/protein_coding	364.272	0.217118	0.064795	3.35085	0.000805642	0.012636	Zc3h18
Cyb5a/ENSMUSG00000024646.9/protein_coding	819.421	-0.181459	0.054174	-3.34956	0.00080941	0.0126828	Cyb5a
Limk2/ENSMUSG00000020451.13/protein_coding	326.557	-0.235687	0.0703737	-3.34908	0.000810808	0.0126925	Limk2
Rps6kc1/ENSMUSG00000089872.6/protein_coding	638.03	0.214729	0.0641235	3.34869	0.00081196	0.0126983	Rps6kc1
Sppl2b/ENSMUSG00000035206.9/protein_coding	459.934	0.209498	0.0625754	3.34792	0.000814195	0.012721	Sppl2b
Chchd2/ENSMUSG00000070493.3/protein_coding	912.452	-0.184515	0.0551459	-3.34594	0.000820043	0.0127878	Chchd2
Ndufb2/ENSMUSG00000002416.9/protein_coding	202.446	-0.30819	0.0921072	-3.34599	0.00081989	0.0127878	Ndufb2
Foxo3/ENSMUSG00000048756.7/protein_coding	144.356	0.323977	0.0968428	3.34539	0.000821673	0.0128009	Foxo3
Snrnp27/ENSMUSG00000001158.9/protein_coding	198.389	-0.271103	0.0810452	-3.34509	0.000822573	0.0128027	Snrnp27
Stap1/ENSMUSG00000029254.12/protein_coding	20.198	-0.33661	0.10071	-3.34238	0.000830619	0.0129155	Stap1
Trim28/ENSMUSG00000005566.9/protein_coding	945.493	0.22226	0.0665064	3.34193	0.000831967	0.0129241	Trim28
Rab22a/ENSMUSG00000027519.6/protein_coding	621.255	0.191208	0.0572413	3.34039	0.000836599	0.0129837	Rab22a
Fn1/ENSMUSG00000026193.11/protein_coding	96.7858	-0.288498	0.0863896	-3.3395	0.00083928	0.0130037	Fn1
Ifi47/ENSMUSG00000078920.2/protein_coding	42.3804	-0.37848	0.113336	-3.33943	0.000839493	0.0130037	Ifi47
Crybb1/ENSMUSG00000029343.13/protein_coding	1308.48	-0.236784	0.0709379	-3.33791	0.000844111	0.0130313	Crybb1
Gm8995/ENSMUSG00000063286.6/unprocessed_pseudogene	920.64	0.23112	0.0692359	3.33815	0.000843368	0.0130313	Gm8995
Hepacam2/ENSMUSG00000044156.10/protein_coding	6.72984	-0.267935	0.0802587	-3.3384	0.000842636	0.0130313	Hepacam2
Nab2/ENSMUSG00000025402.8/protein_coding	253.136	0.248669	0.0745032	3.33769	0.000844774	0.0130313	Nab2
Pgk1/ENSMUSG00000062070.8/protein_coding	569.87	-0.204846	0.0613765	-3.33752	0.000845283	0.0130313	Pgk1
Lypd6/ENSMUSG00000050447.11/protein_coding	77.439	-0.349985	0.104904	-3.33624	0.000849204	0.013067	Lypd6
Stk40/ENSMUSG00000042608.11/protein_coding	784.897	0.190987	0.0572432	3.33642	0.000848644	0.013067	Stk40
Cnih4/ENSMUSG00000062169.9/protein_coding	592.769	-0.198411	0.0595007	-3.3346	0.000854237	0.0131072	Cnih4
Sec13/ENSMUSG00000030298.6/protein_coding	1258.26	-0.241586	0.0724377	-3.33509	0.000852727	0.0131072	Sec13
Vmp1/ENSMUSG00000018171.5/protein_coding	1044.65	-0.252003	0.0755672	-3.33482	0.000853544	0.0131072	Vmp1
Dok2/ENSMUSG00000022102.9/protein_coding	29.8356	-0.377701	0.113282	-3.33417	0.00085553	0.0131146	Dok2
Pdia5/ENSMUSG00000022844.7/protein_coding	202.546	0.268094	0.0804234	3.33353	0.000857519	0.0131327	Pdia5
Mrps35/ENSMUSG00000040112.7/protein_coding	176.326	-0.263374	0.0790506	-3.33172	0.000863118	0.013206	Mrps35
Arl4a/ENSMUSG00000047446.14/protein_coding	75.4715	-0.313056	0.0940176	-3.32976	0.000869207	0.0132742	Arl4a
Ptgs1/ENSMUSG00000047250.9/protein_coding	13954.8	0.14304	0.0429576	3.32979	0.000869119	0.0132742	Ptgs1
Anxa11/ENSMUSG00000021866.11/protein_coding	111.258	-0.334255	0.10043	-3.32823	0.000873988	0.0132848	Anxa11
Epc2/ENSMUSG00000069495.8/protein_coding	101.29	0.339138	0.101872	3.32904	0.00087146	0.0132848	Epc2
Lin9/ENSMUSG00000058729.9/protein_coding	169.477	0.259525	0.0779724	3.32843	0.000873383	0.0132848	Lin9
Naa15/ENSMUSG00000063273.7/protein_coding	554.221	0.20348	0.0611347	3.32839	0.000873501	0.0132848	Naa15
Rft1/ENSMUSG00000052395.11/protein_coding	426.444	-0.222407	0.0668123	-3.32883	0.000872113	0.0132848	Rft1
Bst1/ENSMUSG00000029082.13/protein_coding	5.23402	-0.278004	0.0835763	-3.32635	0.000879921	0.0133362	Bst1
Mon1a/ENSMUSG00000032583.3/protein_coding	162.532	0.251687	0.0756669	3.32626	0.00088021	0.0133362	Mon1a
Thbs1/ENSMUSG00000040152.8/protein_coding	223.789	-0.376453	0.113173	-3.32636	0.000879876	0.0133362	Thbs1
Tsc22d4/ENSMUSG00000029723.12/protein_coding	1913.91	0.137351	0.0412948	3.32612	0.000880651	0.0133362	Tsc22d4
Wdr81/ENSMUSG00000045374.14/protein_coding	1986.02	0.234163	0.070412	3.32561	0.000882257	0.013348	Wdr81
Cfap43/ENSMUSG00000044948.12/protein_coding	125.436	-0.328811	0.098912	-3.32428	0.00088648	0.0133994	Cfap43
Snrpd2/ENSMUSG00000040824.2/protein_coding	96.6531	-0.326097	0.098126	-3.32325	0.000889756	0.0134365	Snrpd2
Slc35b2/ENSMUSG00000037089.9/protein_coding	2388.44	-0.248997	0.0749324	-3.32295	0.000890713	0.0134384	Slc35b2
Sh2b3/ENSMUSG00000042594.12/protein_coding	3660.97	0.169325	0.0509687	3.32214	0.000893289	0.0134648	Sh2b3
Plcg2/ENSMUSG00000034330.9/protein_coding	3312.87	0.182858	0.055076	3.3201	0.000899837	0.0135331	Plcg2
Rnd3/ENSMUSG00000017144.4/protein_coding	12.5961	-0.353639	0.106519	-3.31996	0.000900319	0.0135331	Rnd3
Tanc2/ENSMUSG00000053580.11/protein_coding	7880.38	0.244839	0.0737391	3.32034	0.000899085	0.0135331	Tanc2
Csrp1/ENSMUSG00000026421.10/protein_coding	23.8068	-0.375748	0.113255	-3.31773	0.000907517	0.0136071	Csrp1
Fgd4/ENSMUSG00000022788.12/protein_coding	711.19	-0.176848	0.0533093	-3.3174	0.000908593	0.0136071	Fgd4
Gm2916/ENSMUSG00000096218.2/protein_coding	114.515	-0.369933	0.11151	-3.31749	0.000908317	0.0136071	Gm2916
Tpm3-rs7/ENSMUSG00000058126.6/protein_coding	73.7415	0.326699	0.0984749	3.31758	0.000908008	0.0136071	Tpm3-rs7
Apob/ENSMUSG00000020609.10/protein_coding	6.22926	-0.258911	0.0781303	-3.31383	0.000920279	0.0137568	Apob
Ccl12/ENSMUSG00000035352.3/protein_coding	386.866	-0.318668	0.0961854	-3.31306	0.000922802	0.0137568	Ccl12
Ighd/ENSMUSG00000104213.1/IG_C_gene	144.571	-0.274907	0.0829768	-3.31306	0.000922817	0.0137568	Ighd
Mettl16/ENSMUSG00000010554.10/protein_coding	300.724	0.226634	0.0683993	3.3134	0.00092168	0.0137568	Mettl16
Zdhhc18/ENSMUSG00000037553.10/protein_coding	479.038	0.213828	0.0645232	3.31397	0.000919822	0.0137568	Zdhhc18
Ahnak/ENSMUSG00000069833.8/protein_coding	118.436	-0.367309	0.110922	-3.31142	0.000928233	0.0138248	Ahnak
Rffl/ENSMUSG00000020696.14/protein_coding	1363.61	-0.192951	0.0582734	-3.31113	0.000929205	0.0138266	Rffl
Clstn3/ENSMUSG00000008153.7/protein_coding	3.30091	-0.247582	0.0748086	-3.30953	0.000934514	0.0138814	Clstn3
Gstk1/ENSMUSG00000029864.5/protein_coding	51.594	-0.353149	0.106707	-3.30951	0.000934598	0.0138814	Gstk1
Osgepl1/ENSMUSG00000026096.10/protein_coding	165.739	-0.302124	0.0913158	-3.30857	0.000937744	0.0139154	Osgepl1
Cacnb3/ENSMUSG00000003352.9/protein_coding	1.99982	-0.204273	0.0617688	-3.30706	0.000942793	0.0139693	Cacnb3
Ednrb/ENSMUSG00000022122.10/protein_coding	58.2075	-0.360929	0.109159	-3.30646	0.000944812	0.0139693	Ednrb
Ncam1/ENSMUSG00000039542.11/protein_coding	2.78206	-0.231619	0.0700482	-3.30657	0.000944455	0.0139693	Ncam1
Usmg5/ENSMUSG00000071528.3/protein_coding	273.837	-0.332898	0.100677	-3.3066	0.000944364	0.0139693	Usmg5
Oas3/ENSMUSG00000032661.8/protein_coding	25.9065	-0.284405	0.0860408	-3.30547	0.000948178	0.013993	Oas3
Pcbp1/ENSMUSG00000051695.6/protein_coding	2549.78	0.147979	0.0447708	3.30526	0.000948872	0.013993	Pcbp1
Trnau1ap/ENSMUSG00000028898.11/protein_coding	219.133	-0.243108	0.0735527	-3.30523	0.000949001	0.013993	Trnau1ap
Atp1a1/ENSMUSG00000033161.9/protein_coding	878.157	0.368765	0.111618	3.30381	0.000953802	0.0140256	Atp1a1
Clgn/ENSMUSG00000002190.9/protein_coding	236.59	-0.269278	0.0814958	-3.30419	0.000952501	0.0140256	Clgn
Dctn1/ENSMUSG00000031865.11/protein_coding	747.145	0.165738	0.0501621	3.30405	0.000952995	0.0140256	Dctn1
Gltscr1/ENSMUSG00000070808.3/protein_coding	136.594	0.350324	0.106087	3.30225	0.000959123	0.0140911	Gltscr1
Prr14/ENSMUSG00000030822.11/protein_coding	755.935	0.168737	0.0511021	3.30197	0.000960097	0.0140927	Prr14
Atraid/ENSMUSG00000013622.11/protein_coding	1543.15	-0.146064	0.0442645	-3.29979	0.000967581	0.0141848	Atraid
Med31/ENSMUSG00000020801.8/protein_coding	139.416	-0.266685	0.0808351	-3.29913	0.000969865	0.0141848	Med31
Thrsp/ENSMUSG00000035686.7/protein_coding	491.96	-0.210946	0.0639372	-3.29927	0.000969377	0.0141848	Thrsp
Tmem176b/ENSMUSG00000029810.11/protein_coding	4696.17	0.224753	0.0681175	3.2995	0.000968575	0.0141848	Tmem176b
Kdm7a/ENSMUSG00000042599.8/protein_coding	1016.95	0.19321	0.0585932	3.29747	0.000975589	0.0142557	Kdm7a
Mrps18a/ENSMUSG00000023967.5/protein_coding	324.081	-0.22892	0.0694654	-3.29546	0.000982623	0.0143456	Mrps18a
Swi5/ENSMUSG00000044627.7/protein_coding	487.262	-0.181082	0.0549622	-3.29466	0.000985406	0.0143733	Swi5
Smim3/ENSMUSG00000038059.6/protein_coding	294.729	0.215762	0.0655117	3.29349	0.000989514	0.0144203	Smim3
Kras/ENSMUSG00000030265.10/protein_coding	721.675	0.259191	0.0787281	3.29223	0.000993948	0.0144719	Kras
Cbr2/ENSMUSG00000025150.6/protein_coding	81.8532	-0.36516	0.110961	-3.29089	0.000998705	0.0145022	Cbr2
Dlst/ENSMUSG00000004789.9/protein_coding	917.391	0.208572	0.0633695	3.29136	0.000997051	0.0145022	Dlst
Hist1h3e/ENSMUSG00000069273.2/protein_coding	139.675	-0.372516	0.113195	-3.29093	0.000998559	0.0145022	Hist1h3e
Crebbp/ENSMUSG00000022521.9/protein_coding	987.88	0.276199	0.0839433	3.29031	0.00100078	0.0145063	Crebbp
Fam53b/ENSMUSG00000030956.11/protein_coding	1436.3	0.198519	0.0603299	3.29055	0.000999912	0.0145063	Fam53b
Chchd1/ENSMUSG00000063787.3/protein_coding	132.492	-0.313567	0.0953249	-3.28946	0.0010038	0.0145243	Chchd1
Rbbp4/ENSMUSG00000057236.10/protein_coding	2168.68	-0.177597	0.0539862	-3.28966	0.00100307	0.0145243	Rbbp4
Ndufa4/ENSMUSG00000029632.5/protein_coding	474.665	-0.234709	0.07138	-3.28816	0.00100843	0.0145782	Ndufa4
Crip2/ENSMUSG00000006356.6/protein_coding	5.50781	-0.273207	0.0831269	-3.28662	0.00101397	0.0146323	Crip2
Smarcc2/ENSMUSG00000025369.10/protein_coding	1383.36	0.174378	0.0530558	3.28669	0.00101373	0.0146323	Smarcc2
Tulp4/ENSMUSG00000034377.6/protein_coding	612.411	0.209302	0.0637199	3.28472	0.00102083	0.0147183	Tulp4
Soat1/ENSMUSG00000026600.8/protein_coding	1274.51	-0.140413	0.0427533	-3.28425	0.00102254	0.0147298	Soat1
RP23-349K15.2/ENSMUSG00000104222.1/TEC	600.36	0.217274	0.0661777	3.28319	0.00102638	0.0147721	RP23-349K15.2
Lrp6/ENSMUSG00000030201.11/protein_coding	544.394	0.228626	0.0696552	3.28226	0.00102979	0.014808	Lrp6
Csgalnact2/ENSMUSG00000042042.10/protein_coding	302.357	-0.231137	0.0704292	-3.28183	0.00103135	0.0148173	Csgalnact2
Prr14l/ENSMUSG00000054280.10/protein_coding	774.284	0.182174	0.0555213	3.28115	0.00103384	0.01484	Prr14l
Ubr5/ENSMUSG00000037487.6/protein_coding	912.759	0.210349	0.0641163	3.28074	0.00103536	0.0148487	Ubr5
4930444A19Rik/ENSMUSG00000101674.2/antisense	18.1519	0.368796	0.112555	3.27659	0.00105068	0.0150552	4930444A19Rik
Ms4a6d/ENSMUSG00000024679.6/protein_coding	1115.42	-0.203084	0.062039	-3.27349	0.00106229	0.0152064	Ms4a6d
Notch1/ENSMUSG00000026923.11/protein_coding	740.384	0.245751	0.0750782	3.27327	0.00106311	0.0152064	Notch1
Setd2/ENSMUSG00000044791.12/protein_coding	989.147	0.185195	0.0566046	3.27173	0.00106892	0.0152761	Setd2
Rras2/ENSMUSG00000055723.5/protein_coding	204.244	0.272775	0.0833859	3.27124	0.00107077	0.0152891	Rras2
Xdh/ENSMUSG00000024066.8/protein_coding	83.833	-0.305812	0.0934929	-3.27097	0.0010718	0.0152903	Xdh
Itga9/ENSMUSG00000039115.9/protein_coding	2133.18	0.157316	0.0480999	3.2706	0.00107319	0.0152967	Itga9
Gm2000/ENSMUSG00000078193.2/protein_coding	152.908	-0.308444	0.0943441	-3.26935	0.00107795	0.0153511	Gm2000
Adck3/ENSMUSG00000026489.9/protein_coding	158.923	-0.269524	0.0824519	-3.26886	0.00107981	0.0153642	Adck3
Hcn2/ENSMUSG00000020331.5/protein_coding	13.8799	0.360042	0.110159	3.26838	0.00108164	0.0153767	Hcn2
Cav2/ENSMUSG00000000058.6/protein_coding	136.22	-0.301819	0.0923763	-3.26727	0.00108589	0.0154	Cav2
Foxp1/ENSMUSG00000030067.13/protein_coding	509.222	0.265049	0.0811128	3.26766	0.00108442	0.0154	Foxp1
Maml3/ENSMUSG00000061143.11/protein_coding	645.655	0.241652	0.0739627	3.26721	0.00108612	0.0154	Maml3
Cotl1/ENSMUSG00000031827.8/protein_coding	1013.01	0.361664	0.110704	3.26695	0.00108715	0.0154011	Cotl1
Lrrc75aos2/ENSMUSG00000085762.1/antisense	23.0126	0.3216	0.098452	3.26657	0.00108861	0.0154083	Lrrc75aos2
Crybg3/ENSMUSG00000022723.11/protein_coding	117.484	0.309164	0.0946662	3.26584	0.00109142	0.0154338	Crybg3
Slc25a5/ENSMUSG00000016319.3/protein_coding	4320.83	-0.167882	0.0514091	-3.2656	0.00109231	0.0154338	Slc25a5
Rab43/ENSMUSG00000030055.12/protein_coding	1057.69	0.222841	0.0682807	3.2636	0.00110006	0.0155299	Rab43
Msantd3/ENSMUSG00000039693.7/protein_coding	1.05716	-0.152558	0.0467623	-3.26243	0.00110463	0.0155809	Msantd3
Usp24/ENSMUSG00000028514.11/protein_coding	848.517	0.226502	0.0694425	3.26172	0.00110737	0.0156059	Usp24
Habp4/ENSMUSG00000021476.8/protein_coding	148.433	-0.270005	0.0827993	-3.26096	0.00111035	0.0156344	Habp4
Klrb1c/ENSMUSG00000030325.12/protein_coding	7.27591	-0.285595	0.0875936	-3.26046	0.00111234	0.0156488	Klrb1c
Ccdc80/ENSMUSG00000022665.10/protein_coding	9.10885	-0.337918	0.103707	-3.2584	0.00112043	0.015749	Ccdc80
Cd200r1/ENSMUSG00000022667.13/protein_coding	348.256	-0.233149	0.0715801	-3.25718	0.00112526	0.0157896	Cd200r1
Ralbp1/ENSMUSG00000024096.12/protein_coding	277.173	0.225573	0.0692539	3.25719	0.00112521	0.0157896	Ralbp1
Prex1/ENSMUSG00000039621.9/protein_coding	5969.31	0.172963	0.0531386	3.25494	0.00113416	0.0159008	Prex1
Clasp1/ENSMUSG00000064302.9/protein_coding	449.526	0.180508	0.0554709	3.2541	0.00113753	0.0159301	Clasp1
Uqcrq/ENSMUSG00000044894.10/protein_coding	295.37	-0.26964	0.0828662	-3.25393	0.00113822	0.0159301	Uqcrq
Mogat2/ENSMUSG00000052396.7/protein_coding	1.27451	-0.149898	0.0460754	-3.25333	0.00114063	0.0159501	Mogat2
Rwdd3/ENSMUSG00000028133.13/protein_coding	58.9418	-0.331904	0.102033	-3.2529	0.00114232	0.0159601	Rwdd3
Gm2423/ENSMUSG00000061724.4/processed_pseudogene	89.0898	-0.344219	0.105841	-3.25223	0.00114504	0.0159706	Gm2423
Sfmbt2/ENSMUSG00000061186.11/protein_coding	38.5574	-0.358121	0.110109	-3.25242	0.00114425	0.0159706	Sfmbt2
Pip5k1b/ENSMUSG00000024867.10/protein_coding	1.4168	-0.173787	0.0534426	-3.25184	0.00114659	0.0159786	Pip5k1b
Syngr1/ENSMUSG00000022415.8/protein_coding	2052.51	-0.199986	0.0615239	-3.25054	0.00115185	0.0160381	Syngr1
D17Wsu104e/ENSMUSG00000019579.9/protein_coding	752.257	-0.169798	0.0522472	-3.2499	0.00115446	0.0160606	D17Wsu104e
Kcnma1/ENSMUSG00000063142.9/protein_coding	229.328	0.248563	0.0764947	3.24941	0.00115643	0.0160743	Kcnma1
Bloc1s1/ENSMUSG00000090247.3/protein_coding	177.993	-0.252036	0.0776255	-3.24682	0.00116704	0.0162078	Bloc1s1
Ptk2b/ENSMUSG00000059456.9/protein_coding	1623.83	0.174466	0.0537564	3.24549	0.0011725	0.0162698	Ptk2b
Cyp4f16/ENSMUSG00000048440.11/protein_coding	101.421	-0.33452	0.103119	-3.24403	0.00117849	0.0162992	Cyp4f16
Gm10409/ENSMUSG00000096488.1/protein_coding	103.523	-0.313747	0.0967161	-3.244	0.00117863	0.0162992	Gm10409
Gm3020/ENSMUSG00000079402.5/protein_coding	103.523	-0.313747	0.0967161	-3.244	0.00117863	0.0162992	Gm3020
Sptan1/ENSMUSG00000057738.9/protein_coding	301.169	0.250714	0.0772681	3.24473	0.00117563	0.0162992	Sptan1
Stfa2l1/ENSMUSG00000059657.4/protein_coding	0.95052	-0.137722	0.0424622	-3.2434	0.00118114	0.0163061	Stfa2l1
Tmem176a/ENSMUSG00000023367.10/protein_coding	1737.08	0.214699	0.0661924	3.24356	0.00118045	0.0163061	Tmem176a
Defb11/ENSMUSG00000045337.4/protein_coding	0.961819	-0.152528	0.0470494	-3.24187	0.00118747	0.0163684	Defb11
Nhp2l1/ENSMUSG00000063480.7/protein_coding	601.558	-0.176485	0.054444	-3.24158	0.00118867	0.0163684	Nhp2l1
Pfdn5/ENSMUSG00000001289.8/protein_coding	308.717	-0.283844	0.087558	-3.24179	0.00118783	0.0163684	Pfdn5
E2f2/ENSMUSG00000018983.9/protein_coding	59.5098	-0.331558	0.102307	-3.24081	0.00119189	0.0163989	E2f2
Eif4a1/ENSMUSG00000059796.12/protein_coding	2716.89	0.184248	0.0568686	3.2399	0.00119573	0.0164377	Eif4a1
Fcgrt/ENSMUSG00000003420.7/protein_coding	1281.45	-0.207267	0.0640113	-3.23798	0.0012038	0.0165347	Fcgrt
Dlc1/ENSMUSG00000031523.12/protein_coding	116.042	-0.330119	0.101962	-3.23766	0.00120514	0.0165391	Dlc1
D17Wsu92e/ENSMUSG00000056692.8/protein_coding	192.789	0.280342	0.0865977	3.23729	0.0012067	0.0165452	D17Wsu92e
Fas/ENSMUSG00000024778.8/protein_coding	18.9552	-0.366399	0.113204	-3.23662	0.00120953	0.0165452	Fas
Nudt7/ENSMUSG00000031767.9/protein_coding	240.269	-0.251528	0.0777139	-3.23659	0.00120965	0.0165452	Nudt7
Tex15/ENSMUSG00000009628.10/protein_coding	1.00617	-0.136935	0.042307	-3.2367	0.00120922	0.0165452	Tex15
Rpl35a/ENSMUSG00000060636.9/protein_coding	354.395	-0.255477	0.0789565	-3.23566	0.0012136	0.0165712	Rpl35a
Tcp11l1/ENSMUSG00000027175.6/protein_coding	143.65	0.269501	0.0832885	3.23576	0.0012132	0.0165712	Tcp11l1
Ndufc2/ENSMUSG00000030647.8/protein_coding	513.789	-0.193634	0.0598609	-3.23473	0.00121759	0.0166118	Ndufc2
Lpar5/ENSMUSG00000067714.9/protein_coding	408.523	0.243017	0.0751683	3.23298	0.00122508	0.016644	Lpar5
Ltf/ENSMUSG00000032496.3/protein_coding	587.794	-0.135051	0.0417702	-3.23319	0.00122417	0.016644	Ltf
Slc6a20a/ENSMUSG00000036814.8/protein_coding	1.96989	-0.192375	0.0595023	-3.23307	0.00122468	0.016644	Slc6a20a
Tmem108/ENSMUSG00000042757.11/protein_coding	1.554	-0.154018	0.0476264	-3.23387	0.00122124	0.016644	Tmem108
Vamp8/ENSMUSG00000050732.9/protein_coding	1451.13	-0.199951	0.0618416	-3.23328	0.0012238	0.016644	Vamp8
Nipbl/ENSMUSG00000022141.6/protein_coding	605.228	0.275492	0.0852334	3.23221	0.00122838	0.0166749	Nipbl
Crot/ENSMUSG00000003623.4/protein_coding	1173.85	-0.2522	0.078143	-3.22742	0.00124911	0.0169035	Crot
Eng/ENSMUSG00000026814.12/protein_coding	1673.35	0.237256	0.073513	3.2274	0.00124919	0.0169035	Eng
Rnf169/ENSMUSG00000058761.4/protein_coding	394.561	0.307548	0.0952915	3.22745	0.001249	0.0169035	Rnf169
Srpr/ENSMUSG00000032042.7/protein_coding	1694.27	-0.146327	0.0453396	-3.22736	0.00124938	0.0169035	Srpr
Bin3/ENSMUSG00000022089.8/protein_coding	438.682	-0.227787	0.0706031	-3.2263	0.00125401	0.0169462	Bin3
Cnot6/ENSMUSG00000020362.9/protein_coding	511.594	0.201245	0.0623791	3.22616	0.00125462	0.0169462	Cnot6
Serinc2/ENSMUSG00000023232.13/protein_coding	1.37583	-0.157498	0.048836	-3.22504	0.00125955	0.0169987	Serinc2
Gpm6b/ENSMUSG00000031342.13/protein_coding	46.0321	-0.355109	0.110143	-3.22408	0.00126377	0.0170414	Gpm6b
Smad7/ENSMUSG00000025880.7/protein_coding	964.095	0.216768	0.0672599	3.22284	0.00126928	0.0171017	Smad7
Jade2/ENSMUSG00000020387.11/protein_coding	266.748	0.300558	0.0932771	3.2222	0.00127209	0.0171253	Jade2
Bptf/ENSMUSG00000040481.12/protein_coding	355.523	0.279307	0.0867141	3.22101	0.00127739	0.0171756	Bptf
Gsk3b/ENSMUSG00000022812.9/protein_coding	846.258	0.228571	0.0709652	3.22089	0.00127795	0.0171756	Gsk3b
Ptprd/ENSMUSG00000028399.13/protein_coding	4.34612	-0.254772	0.0791097	-3.22049	0.0012797	0.017185	Ptprd
Sdf2l1/ENSMUSG00000022769.7/protein_coding	1307.67	-0.25288	0.078529	-3.22022	0.00128094	0.0171874	Sdf2l1
Rps12/ENSMUSG00000061983.6/protein_coding	201.05	-0.269637	0.0837514	-3.21949	0.00128418	0.0172167	Rps12
Coa3/ENSMUSG00000017188.3/protein_coding	378.408	-0.257419	0.0799964	-3.21788	0.00129143	0.0172996	Coa3
Cd55/ENSMUSG00000026399.8/protein_coding	6.03833	-0.266204	0.08274	-3.21736	0.00129378	0.0173169	Cd55
Sfrp1/ENSMUSG00000031548.7/protein_coding	1.02349	-0.157085	0.0488348	-3.21666	0.00129693	0.0173447	Sfrp1
Gm3244/ENSMUSG00000083380.1/processed_pseudogene	148.476	-0.318245	0.0989444	-3.2164	0.00129809	0.017346	Gm3244
Klhl23/ENSMUSG00000042155.3/protein_coding	288.323	0.211327	0.0657093	3.21609	0.00129949	0.0173504	Klhl23
Timm8b/ENSMUSG00000039016.4/protein_coding	164.154	-0.305876	0.0951209	-3.21566	0.00130146	0.0173624	Timm8b
Tab2/ENSMUSG00000015755.12/protein_coding	559.355	0.240406	0.0747797	3.21486	0.00130509	0.0173965	Tab2
Ifitm1/ENSMUSG00000025491.10/protein_coding	3.46566	-0.170817	0.053145	-3.21417	0.00130824	0.0174223	Ifitm1
Mrpl15/ENSMUSG00000033845.9/protein_coding	295.527	-0.247644	0.0770526	-3.21396	0.00130917	0.0174223	Mrpl15
Zeb2/ENSMUSG00000026872.12/protein_coding	2268.34	0.216252	0.0673484	3.21095	0.00132297	0.0175772	Zeb2
Zfp384/ENSMUSG00000038346.14/protein_coding	989.847	0.172785	0.0538105	3.21099	0.00132278	0.0175772	Zfp384
Usp48/ENSMUSG00000043411.11/protein_coding	860.092	0.191182	0.0595952	3.20802	0.00133654	0.017743	Usp48
Kmt2b/ENSMUSG00000006307.12/protein_coding	174.345	0.31993	0.0997368	3.20774	0.00133781	0.0177454	Kmt2b
Tnrc18/ENSMUSG00000039477.12/protein_coding	625.379	0.240903	0.0751826	3.20424	0.0013542	0.0179482	Tnrc18
Adcy7/ENSMUSG00000031659.8/protein_coding	2202.1	0.163017	0.0509573	3.19909	0.00137862	0.0182233	Adcy7
Cebpz/ENSMUSG00000024081.8/protein_coding	697.259	0.217684	0.0680458	3.19908	0.00137867	0.0182233	Cebpz
Gdap2/ENSMUSG00000027865.6/protein_coding	504.811	0.172333	0.0538698	3.19907	0.0013787	0.0182233	Gdap2
Serpina3g/ENSMUSG00000041481.12/protein_coding	2.61392	-0.190879	0.0596698	-3.19892	0.00137945	0.0182233	Serpina3g
Chd1/ENSMUSG00000023852.9/protein_coding	505.985	0.247794	0.0774768	3.1983	0.00138239	0.0182473	Chd1
Syk/ENSMUSG00000021457.10/protein_coding	2591.33	0.133919	0.0418846	3.19733	0.00138708	0.0182944	Syk
Itga3/ENSMUSG00000001507.12/protein_coding	1.18226	-0.158938	0.0497224	-3.19651	0.001391	0.0183312	Itga3
Oxsr1/ENSMUSG00000036737.8/protein_coding	150.183	0.285161	0.0892243	3.19601	0.00139344	0.0183485	Oxsr1
Gm16556/ENSMUSG00000090192.1/processed_transcript	1.33432	-0.155754	0.0487523	-3.19481	0.00139923	0.0184098	Gm16556
Sf3a1/ENSMUSG00000002129.7/protein_coding	665.844	0.150656	0.0471698	3.19391	0.00140357	0.018452	Sf3a1
Nsd1/ENSMUSG00000021488.7/protein_coding	1024.99	0.216444	0.0677767	3.19349	0.00140562	0.018464	Nsd1
Zfp385a/ENSMUSG00000000552.9/protein_coding	678.899	0.231775	0.0725981	3.19257	0.0014101	0.0185079	Zfp385a
RP24-441N3.3/ENSMUSG00000103043.1/lincRNA	51.3303	-0.346905	0.108683	-3.1919	0.00141342	0.0185364	RP24-441N3.3
Eps8l2/ENSMUSG00000025504.8/protein_coding	1.51441	-0.176668	0.055365	-3.19097	0.00141795	0.0185808	Eps8l2
Zfyve1/ENSMUSG00000042628.7/protein_coding	466.128	0.192225	0.0602761	3.18908	0.00142727	0.0186879	Zfyve1
Tmem256/ENSMUSG00000070394.6/protein_coding	240.53	-0.316361	0.0992329	-3.18807	0.00143228	0.0187384	Tmem256
Cbr1/ENSMUSG00000051483.8/protein_coding	305.374	-0.238065	0.0747074	-3.18664	0.00143936	0.0188008	Cbr1
Lnpep/ENSMUSG00000023845.6/protein_coding	322.291	0.262146	0.0822589	3.18684	0.00143836	0.0188008	Lnpep
Nme3/ENSMUSG00000073435.6/protein_coding	157.458	-0.273928	0.0860122	-3.18476	0.00144876	0.0188942	Nme3
Rpl26/ENSMUSG00000060938.10/protein_coding	385.66	-0.247178	0.0776132	-3.18474	0.00144884	0.0188942	Rpl26
Ltb/ENSMUSG00000024399.5/protein_coding	60.993	-0.341691	0.107309	-3.18418	0.00145166	0.0189115	Ltb
Mcfd2/ENSMUSG00000024150.7/protein_coding	2486.39	-0.220476	0.0692446	-3.18401	0.00145249	0.0189115	Mcfd2
Gm15232/ENSMUSG00000084806.1/lincRNA	52.1386	-0.336908	0.105841	-3.18315	0.00145684	0.0189529	Gm15232
Agmo/ENSMUSG00000050103.13/protein_coding	1184.75	-0.165391	0.0519641	-3.18278	0.00145866	0.0189614	Agmo
Tuft1/ENSMUSG00000005968.10/protein_coding	49.8598	-0.341633	0.107386	-3.18137	0.00146582	0.0190393	Tuft1
Ergic3/ENSMUSG00000005881.9/protein_coding	1742.3	-0.12503	0.0393092	-3.18068	0.00146931	0.0190635	Ergic3
Gm5483/ENSMUSG00000079597.1/protein_coding	0.825162	-0.133159	0.0418699	-3.1803	0.0014712	0.0190635	Gm5483
Map4k4/ENSMUSG00000026074.10/protein_coding	706.13	0.241192	0.0758341	3.18052	0.00147011	0.0190635	Map4k4
Adrm1/ENSMUSG00000039041.11/protein_coding	828.138	0.135904	0.0427447	3.17944	0.00147561	0.0190901	Adrm1
Jrk/ENSMUSG00000046380.3/protein_coding	122.914	-0.287745	0.0905017	-3.17945	0.00147557	0.0190901	Jrk
Tmem144/ENSMUSG00000027956.7/protein_coding	782.767	-0.210189	0.0661193	-3.17894	0.00147816	0.0191078	Tmem144
Zbtb40/ENSMUSG00000060862.9/protein_coding	184.244	0.289366	0.0910499	3.1781	0.00148243	0.0191478	Zbtb40
Mob3a/ENSMUSG00000003348.9/protein_coding	1447.9	0.170332	0.0536063	3.17746	0.00148571	0.019175	Mob3a
Tenm4/ENSMUSG00000048078.12/protein_coding	1.33947	-0.160879	0.0506478	-3.17642	0.00149104	0.0192285	Tenm4
Mmachc/ENSMUSG00000028690.4/protein_coding	156.2	0.272481	0.0858153	3.17521	0.00149729	0.0192937	Mmachc
Fam131a/ENSMUSG00000050821.9/protein_coding	162.706	0.232072	0.0731169	3.17399	0.00150359	0.0193385	Fam131a
Fam213a/ENSMUSG00000021792.11/protein_coding	59.8209	-0.330781	0.104227	-3.17366	0.0015053	0.0193385	Fam213a
Gpr65/ENSMUSG00000021886.6/protein_coding	121.301	0.322675	0.101662	3.17399	0.00150357	0.0193385	Gpr65
Lasp1/ENSMUSG00000038366.11/protein_coding	3076.64	0.194442	0.0612682	3.17362	0.00150552	0.0193385	Lasp1
Psap/ENSMUSG00000004207.10/protein_coding	29746.5	0.244748	0.0771283	3.17326	0.00150739	0.0193472	Psap
9330160F10Rik/ENSMUSG00000072809.2/antisense	67.9857	-0.325707	0.102664	-3.17257	0.00151098	0.019378	9330160F10Rik
Ube2d3/ENSMUSG00000078578.5/protein_coding	3173.83	-0.179683	0.0566417	-3.17227	0.00151252	0.0193824	Ube2d3
Ttll12/ENSMUSG00000016757.6/protein_coding	142.956	0.288081	0.0908223	3.17192	0.00151432	0.0193902	Ttll12
Rps18/ENSMUSG00000008668.10/protein_coding	581.762	-0.273451	0.0862293	-3.17121	0.00151807	0.0194229	Rps18
Camk1/ENSMUSG00000030272.11/protein_coding	5507.78	-0.199103	0.0627964	-3.17061	0.0015212	0.0194327	Camk1
Prtn3/ENSMUSG00000057729.8/protein_coding	0.879107	-0.131903	0.0416019	-3.1706	0.00152122	0.0194327	Prtn3
Laptm5/ENSMUSG00000028581.13/protein_coding	46241.1	0.159754	0.0504057	3.16937	0.0015277	0.0195001	Laptm5
L3hypdh/ENSMUSG00000019718.4/protein_coding	24.9294	-0.3582	0.113038	-3.16886	0.00153039	0.019519	L3hypdh
Galk1/ENSMUSG00000020766.4/protein_coding	173.514	-0.240908	0.0760519	-3.16768	0.00153659	0.0195522	Galk1
Kif5b/ENSMUSG00000006740.9/protein_coding	773.137	0.172822	0.0545579	3.16768	0.0015366	0.0195522	Kif5b
Lyz1/ENSMUSG00000069515.5/protein_coding	11.5159	-0.281614	0.0888953	-3.16793	0.00153529	0.0195522	Lyz1
Gm28933/ENSMUSG00000099597.1/lincRNA	110.673	0.309216	0.0976274	3.16731	0.00153857	0.019562	Gm28933
Fbxl12/ENSMUSG00000066892.9/protein_coding	356.755	-0.226135	0.0714054	-3.16692	0.00154063	0.0195729	Fbxl12
Idh2/ENSMUSG00000030541.12/protein_coding	1835.67	-0.137542	0.0434595	-3.16483	0.00155175	0.0196834	Idh2
Tk1/ENSMUSG00000025574.9/protein_coding	49.5593	0.333129	0.105255	3.16498	0.00155092	0.0196834	Tk1
Msrb2/ENSMUSG00000023094.10/protein_coding	563.375	-0.18933	0.0598461	-3.16362	0.0015582	0.0197344	Msrb2
Pifo/ENSMUSG00000010136.10/protein_coding	0.990457	-0.145262	0.0459163	-3.16363	0.00155814	0.0197344	Pifo
Sdf2/ENSMUSG00000002064.10/protein_coding	487.423	-0.235017	0.0742978	-3.16318	0.00156058	0.0197491	Sdf2
Emilin2/ENSMUSG00000024053.10/protein_coding	105.194	-0.333975	0.105603	-3.16254	0.00156401	0.0197771	Emilin2
Cnbp/ENSMUSG00000030057.11/protein_coding	4313.43	-0.184891	0.0584675	-3.16229	0.00156534	0.0197786	Cnbp
Mier3/ENSMUSG00000032727.9/protein_coding	300.189	0.258311	0.0816991	3.16173	0.00156832	0.0198008	Mier3
Dcun1d2/ENSMUSG00000038506.9/protein_coding	358.862	0.212803	0.0673159	3.16127	0.00157084	0.0198142	Dcun1d2
Ralgapa1/ENSMUSG00000021027.11/protein_coding	581.473	0.182136	0.0576181	3.16109	0.00157182	0.0198142	Ralgapa1
Prf1/ENSMUSG00000037202.5/protein_coding	8.35892	-0.236491	0.0748334	-3.16023	0.00157646	0.0198573	Prf1
Sfpq/ENSMUSG00000028820.9/protein_coding	660.507	0.22847	0.0723226	3.15903	0.00158294	0.0199234	Sfpq
Gnb1/ENSMUSG00000029064.11/protein_coding	1411.17	0.154496	0.0489114	3.1587	0.00158475	0.0199308	Gnb1
Dyrk4/ENSMUSG00000030345.12/protein_coding	162.072	0.253633	0.080304	3.15841	0.00158632	0.0199351	Dyrk4
Fcna/ENSMUSG00000026938.10/protein_coding	16.0096	-0.345778	0.109488	-3.15813	0.00158786	0.0199391	Fcna
Tmem72/ENSMUSG00000048108.9/protein_coding	1.72519	-0.184631	0.0584717	-3.15761	0.00159068	0.0199591	Tmem72
Sh2d6/ENSMUSG00000052631.10/protein_coding	28.7349	0.356433	0.112927	3.15631	0.00159777	0.0200326	Sh2d6
Mapre2/ENSMUSG00000024277.10/protein_coding	1247.19	0.163018	0.0516975	3.15331	0.00161432	0.0201991	Mapre2
Ube2k/ENSMUSG00000029203.12/protein_coding	287.048	0.235394	0.0746518	3.15322	0.00161478	0.0201991	Ube2k
Zfp677/ENSMUSG00000062743.5/protein_coding	117.82	-0.285575	0.0905574	-3.15352	0.00161312	0.0201991	Zfp677
Mapk14/ENSMUSG00000053436.10/protein_coding	3127.07	0.132792	0.0421253	3.15231	0.00161982	0.0202465	Mapk14
Sil1/ENSMUSG00000024357.9/protein_coding	442.453	-0.22342	0.0709309	-3.14983	0.00163366	0.0204037	Sil1
Ptpn5/ENSMUSG00000030854.11/protein_coding	2.55312	-0.211352	0.0671174	-3.14899	0.00163835	0.0204466	Ptpn5
Ptger2/ENSMUSG00000037759.5/protein_coding	3.29322	-0.238507	0.0757805	-3.14734	0.00164765	0.020547	Ptger2
Rpl36/ENSMUSG00000057863.5/protein_coding	238.879	-0.26571	0.0844466	-3.14648	0.00165246	0.0205759	Rpl36
Tmem30a/ENSMUSG00000032328.8/protein_coding	3710.61	-0.200389	0.0636867	-3.14648	0.0016525	0.0205759	Tmem30a
Baz1b/ENSMUSG00000002748.6/protein_coding	645.908	0.215146	0.068412	3.14486	0.00166168	0.0206585	Baz1b
Synrg/ENSMUSG00000034940.11/protein_coding	416.164	0.254718	0.0809945	3.14488	0.00166154	0.0206585	Synrg
C330018D20Rik/ENSMUSG00000024592.11/protein_coding	155.084	-0.279885	0.0890088	-3.14446	0.00166394	0.0206636	C330018D20Rik
Zfp472/ENSMUSG00000053600.7/protein_coding	272.862	-0.229517	0.0729939	-3.14434	0.00166463	0.0206636	Zfp472
Akr1e1/ENSMUSG00000045410.13/protein_coding	177.99	-0.26677	0.0848917	-3.14247	0.00167526	0.0207787	Akr1e1
Kif3b/ENSMUSG00000027475.9/protein_coding	350.501	0.237111	0.0754587	3.14226	0.00167646	0.0207787	Kif3b
Avpi1/ENSMUSG00000018821.3/protein_coding	14.1678	-0.343307	0.109317	-3.14048	0.00168671	0.0208897	Avpi1
Ube2e1/ENSMUSG00000021774.8/protein_coding	562.553	-0.173839	0.0553619	-3.14005	0.00168917	0.0209042	Ube2e1
RP24-111C16.1/ENSMUSG00000104292.1/TEC	232.201	0.337803	0.107617	3.13894	0.00169559	0.0209678	RP24-111C16.1
Psmd7/ENSMUSG00000039067.4/protein_coding	703.267	0.1561	0.0497352	3.13862	0.00169747	0.020975	Psmd7
Zfp740/ENSMUSG00000046897.12/protein_coding	1704.46	0.141584	0.0451409	3.13649	0.00170983	0.0211117	Zfp740
Mctp2/ENSMUSG00000032776.8/protein_coding	2.61611	-0.165531	0.0527834	-3.13604	0.00171249	0.0211285	Mctp2
Gm10076/ENSMUSG00000060143.6/protein_coding	131.379	-0.304587	0.0971514	-3.13518	0.00171751	0.0211743	Gm10076
Cdr2/ENSMUSG00000030878.10/protein_coding	9.60776	-0.329566	0.105169	-3.13369	0.00172624	0.0212658	Cdr2
Ang/ENSMUSG00000072115.6/protein_coding	848.439	0.184492	0.0589041	3.13208	0.00173574	0.0213667	Ang
Tbc1d12/ENSMUSG00000048720.7/protein_coding	130.595	0.271397	0.0866588	3.13179	0.00173743	0.0213713	Tbc1d12
Ankle2/ENSMUSG00000029501.10/protein_coding	1795.39	0.145043	0.0463532	3.12908	0.00175357	0.0215372	Ankle2
Ndufa2/ENSMUSG00000014294.4/protein_coding	336.104	-0.214685	0.0686093	-3.12909	0.00175346	0.0215372	Ndufa2
Tsc2/ENSMUSG00000002496.9/protein_coding	792.754	0.190472	0.0608888	3.1282	0.00175882	0.0215854	Tsc2
Ssr2/ENSMUSG00000041355.9/protein_coding	793.954	-0.19471	0.0622605	-3.12734	0.00176396	0.0216322	Ssr2
Nom1/ENSMUSG00000001569.9/protein_coding	269.48	0.200893	0.0642988	3.12437	0.00178189	0.0218355	Nom1
Zfp748/ENSMUSG00000095432.4/protein_coding	580.677	-0.211198	0.0676256	-3.12305	0.0017899	0.0219172	Zfp748
Cnot2/ENSMUSG00000020166.10/protein_coding	1471.49	0.177103	0.0567205	3.12238	0.00179398	0.0219341	Cnot2
Tnfsf14/ENSMUSG00000005824.6/protein_coding	3.17287	-0.219261	0.0702215	-3.12242	0.00179369	0.0219341	Tnfsf14
Sorbs3/ENSMUSG00000022091.5/protein_coding	21.2786	-0.352425	0.112883	-3.12203	0.00179607	0.0219431	Sorbs3
Irs2/ENSMUSG00000038894.6/protein_coding	490.612	0.250233	0.0801747	3.12109	0.00180181	0.0219802	Irs2
Ttc39b/ENSMUSG00000038172.10/protein_coding	631.698	0.178992	0.0573477	3.12118	0.0018013	0.0219802	Ttc39b
Gm2237/ENSMUSG00000093979.3/protein_coding	337.313	-0.278861	0.0894322	-3.11813	0.00182002	0.0220863	Gm2237
Il22ra2/ENSMUSG00000039760.8/protein_coding	3.69508	-0.250096	0.0801987	-3.11846	0.00181801	0.0220863	Il22ra2
Kctd12/ENSMUSG00000098557.1/protein_coding	5343.66	0.283045	0.0907517	3.11889	0.00181532	0.0220863	Kctd12
Pank2/ENSMUSG00000037514.13/protein_coding	711.489	0.141703	0.0454335	3.11891	0.0018152	0.0220863	Pank2
Stx16/ENSMUSG00000027522.11/protein_coding	447.706	0.190495	0.0610916	3.11818	0.00181969	0.0220863	Stx16
Stx7/ENSMUSG00000019998.5/protein_coding	2830.08	0.152735	0.0489806	3.11827	0.00181917	0.0220863	Stx7
Ubqln2/ENSMUSG00000050148.9/protein_coding	150.422	0.26845	0.0860748	3.1188	0.00181592	0.0220863	Ubqln2
Gm26581/ENSMUSG00000097108.1/lincRNA	16.7782	0.347178	0.111392	3.11673	0.00182869	0.0221583	Gm26581
Zfp292/ENSMUSG00000039967.10/protein_coding	1029.06	0.190878	0.0612412	3.11682	0.00182814	0.0221583	Zfp292
Timm10b/ENSMUSG00000089847.3/protein_coding	392.861	-0.225937	0.0725288	-3.11513	0.00183864	0.0222623	Timm10b
Bcam/ENSMUSG00000002980.10/protein_coding	1.29265	-0.161779	0.0519419	-3.11461	0.00184187	0.0222669	Bcam
Itgb7/ENSMUSG00000001281.5/protein_coding	61.5792	-0.299973	0.0963245	-3.1142	0.00184447	0.0222669	Itgb7
Sun2/ENSMUSG00000042524.9/protein_coding	267.983	0.350997	0.112709	3.11419	0.00184449	0.0222669	Sun2
Tmem245/ENSMUSG00000055296.10/protein_coding	947.596	0.210536	0.0676015	3.11437	0.0018434	0.0222669	Tmem245
Acap3/ENSMUSG00000029033.12/protein_coding	213.501	0.25367	0.08147	3.11366	0.0018478	0.0222839	Acap3
Eef2/ENSMUSG00000034994.9/protein_coding	2134.79	0.182871	0.0587346	3.11352	0.00184868	0.0222839	Eef2
Pla2g5/ENSMUSG00000041193.11/protein_coding	1.26595	-0.153572	0.0493277	-3.11331	0.00185002	0.0222839	Pla2g5
Rnf38/ENSMUSG00000035696.11/protein_coding	485.783	0.192399	0.0618093	3.11278	0.00185336	0.0223076	Rnf38
Cryab/ENSMUSG00000032060.9/protein_coding	11.9639	-0.331078	0.106406	-3.11147	0.00186159	0.0223901	Cryab
Chst13/ENSMUSG00000056643.4/protein_coding	0.970654	-0.126777	0.0407543	-3.11077	0.00186603	0.0224269	Chst13
Naaa/ENSMUSG00000029413.10/protein_coding	579.292	0.237844	0.0765184	3.10832	0.00188156	0.0225968	Naaa
Bphl/ENSMUSG00000038286.10/protein_coding	131.536	-0.253943	0.0817385	-3.10677	0.00189142	0.0226984	Bphl
Ddx21/ENSMUSG00000020075.7/protein_coding	217.559	0.249146	0.0802139	3.10602	0.00189622	0.0227381	Ddx21
Padi2/ENSMUSG00000028927.6/protein_coding	1125.53	0.192325	0.0619328	3.10538	0.00190032	0.0227381	Padi2
Parl/ENSMUSG00000033918.11/protein_coding	310.663	-0.213078	0.0686116	-3.10556	0.00189918	0.0227381	Parl
Sdc2/ENSMUSG00000022261.5/protein_coding	1.63234	-0.162307	0.0522625	-3.10561	0.00189885	0.0227381	Sdc2
Nus1/ENSMUSG00000023068.10/protein_coding	296.804	0.208636	0.0671974	3.10483	0.00190388	0.0227639	Nus1
Orm1/ENSMUSG00000039196.2/protein_coding	1.07332	-0.126075	0.0406161	-3.10407	0.00190877	0.0228055	Orm1
A630033H20Rik/ENSMUSG00000054293.6/protein_coding	447.868	-0.231766	0.074674	-3.10371	0.00191113	0.0228097	A630033H20Rik
Phf2/ENSMUSG00000038025.7/protein_coding	283.447	0.284457	0.0916545	3.10358	0.00191192	0.0228097	Phf2
Dtna/ENSMUSG00000024302.11/protein_coding	2.48727	-0.191704	0.0617935	-3.10233	0.00192004	0.0228898	Dtna
C3ar1/ENSMUSG00000040552.8/protein_coding	3889.7	-0.217466	0.0701122	-3.10169	0.00192422	0.0229203	C3ar1
Tacstd2/ENSMUSG00000051397.4/protein_coding	0.847453	-0.126594	0.0408172	-3.1015	0.00192542	0.0229203	Tacstd2
Mapre1/ENSMUSG00000027479.10/protein_coding	2019.37	0.146075	0.0471025	3.10122	0.00192723	0.022925	Mapre1
Cbfb/ENSMUSG00000031885.9/protein_coding	644.994	0.161428	0.0520757	3.09988	0.00193599	0.0230124	Cbfb
Atp6v0b/ENSMUSG00000033379.9/protein_coding	4923.11	-0.263346	0.0849763	-3.09906	0.00194137	0.0230427	Atp6v0b
Pik3cb/ENSMUSG00000032462.10/protein_coding	723.49	0.20871	0.0673453	3.09911	0.00194105	0.0230427	Pik3cb
Mgat5/ENSMUSG00000036155.9/protein_coding	742.367	0.234559	0.075693	3.09882	0.00194295	0.0230445	Mgat5
Rock2/ENSMUSG00000020580.9/protein_coding	1476.19	0.185941	0.0600167	3.09815	0.00194733	0.0230796	Rock2
Zkscan4/ENSMUSG00000054931.6/protein_coding	127.734	-0.262459	0.0847365	-3.09735	0.0019526	0.0231252	Zkscan4
Gm26857/ENSMUSG00000097860.1/lincRNA	107.998	0.325994	0.105277	3.09654	0.00195796	0.0231718	Gm26857
Dstyk/ENSMUSG00000042046.11/protein_coding	527.275	0.203207	0.0656384	3.09586	0.00196244	0.023208	Dstyk
Ccl17/ENSMUSG00000031780.1/protein_coding	1.56198	-0.163411	0.052819	-3.09379	0.00197617	0.023336	Ccl17
Cebpd/ENSMUSG00000071637.4/pseudogene	642.165	0.228146	0.0737485	3.09357	0.00197765	0.023336	Cebpd
Kmt2a/ENSMUSG00000002028.8/protein_coding	577.813	0.287625	0.0929813	3.09336	0.00197901	0.023336	Kmt2a
Nqo1/ENSMUSG00000003849.8/protein_coding	2.82056	-0.212916	0.0688276	-3.09347	0.00197831	0.023336	Nqo1
Asb10/ENSMUSG00000038204.9/protein_coding	136.121	-0.28851	0.0932828	-3.09286	0.00198238	0.0233587	Asb10
Fmnl1/ENSMUSG00000055805.10/protein_coding	2356.33	0.242054	0.0783065	3.09112	0.00199406	0.0234723	Fmnl1
Klc1/ENSMUSG00000021288.14/protein_coding	284.94	0.189307	0.0612543	3.09051	0.00199811	0.0234723	Klc1
Pex11a/ENSMUSG00000030545.8/protein_coding	58.0801	-0.316724	0.102481	-3.09056	0.00199778	0.0234723	Pex11a
Stxbp6/ENSMUSG00000046314.11/protein_coding	6.19512	-0.273141	0.0883838	-3.0904	0.00199885	0.0234723	Stxbp6
Ubr3/ENSMUSG00000044308.13/protein_coding	605.724	0.217488	0.0703766	3.09035	0.00199924	0.0234723	Ubr3
Pcx/ENSMUSG00000024892.11/protein_coding	131.311	-0.290684	0.0940956	-3.08925	0.00200665	0.0235393	Pcx
Tmem173/ENSMUSG00000024349.9/protein_coding	6909.32	0.172443	0.0558235	3.08907	0.00200784	0.0235393	Tmem173
Wdr41/ENSMUSG00000042015.12/protein_coding	664.093	0.20371	0.0659739	3.08773	0.00201689	0.0236283	Wdr41
Sh3bp1/ENSMUSG00000022436.11/protein_coding	1404.31	0.153234	0.0496363	3.08714	0.00202094	0.0236587	Sh3bp1
Usp12/ENSMUSG00000029640.13/protein_coding	1065.72	0.192661	0.0624129	3.08689	0.00202266	0.0236617	Usp12
Nuak2/ENSMUSG00000009772.11/protein_coding	387.315	0.265953	0.0862112	3.0849	0.00203621	0.0237992	Nuak2
Slc6a6/ENSMUSG00000030096.7/protein_coding	1540.55	0.212937	0.0690292	3.08473	0.00203734	0.0237992	Slc6a6
Nup37/ENSMUSG00000035351.11/protein_coding	63.8026	-0.321491	0.104239	-3.08418	0.00204116	0.0238267	Nup37
Sh2b2/ENSMUSG00000005057.9/protein_coding	732.855	0.196754	0.0638216	3.08287	0.00205016	0.0239147	Sh2b2
Mbd4/ENSMUSG00000030322.8/protein_coding	119.777	-0.270841	0.087876	-3.08208	0.00205556	0.0239455	Mbd4
Wbp2/ENSMUSG00000034341.13/protein_coding	1608.9	0.160481	0.0520696	3.08206	0.00205575	0.0239455	Wbp2
4732440D04Rik/ENSMUSG00000090031.2/antisense	71.0879	-0.307336	0.0997427	-3.08129	0.00206108	0.0239609	4732440D04Rik
Derl3/ENSMUSG00000009092.4/protein_coding	12.0494	-0.330561	0.10729	-3.08101	0.00206298	0.0239609	Derl3
Gatsl2/ENSMUSG00000015944.8/protein_coding	261.728	0.285058	0.0925186	3.08108	0.00206249	0.0239609	Gatsl2
Nras/ENSMUSG00000027852.10/protein_coding	694.487	0.16405	0.0532393	3.08138	0.00206046	0.0239609	Nras
Plk3/ENSMUSG00000028680.10/protein_coding	504.548	0.296754	0.0963583	3.0797	0.00207212	0.02405	Plk3
Dnajc13/ENSMUSG00000032560.9/protein_coding	847.973	0.208567	0.0677635	3.07787	0.00208487	0.0241289	Dnajc13
Fam81a/ENSMUSG00000032224.10/protein_coding	2.75187	-0.199778	0.0649053	-3.078	0.00208397	0.0241289	Fam81a
Itgae/ENSMUSG00000005947.7/protein_coding	113.077	-0.266117	0.0864579	-3.078	0.00208398	0.0241289	Itgae
Polr3e/ENSMUSG00000030880.9/protein_coding	450.136	0.177693	0.057731	3.07795	0.00208432	0.0241289	Polr3e
Pask/ENSMUSG00000026274.7/protein_coding	20.4002	0.347788	0.113023	3.07715	0.00208987	0.0241696	Pask
Rgs10/ENSMUSG00000030844.7/protein_coding	4041.3	-0.159729	0.0519183	-3.07655	0.00209409	0.0241842	Rgs10
Sec11c/ENSMUSG00000024516.8/protein_coding	1905.4	-0.215387	0.0700092	-3.07655	0.0020941	0.0241842	Sec11c
Aldh1a1/ENSMUSG00000053279.6/protein_coding	1.97147	-0.180854	0.0588166	-3.07488	0.00210587	0.0242855	Aldh1a1
Slc22a15/ENSMUSG00000033147.12/protein_coding	5.3189	-0.245555	0.079854	-3.07505	0.00210469	0.0242855	Slc22a15
Ddx46/ENSMUSG00000021500.11/protein_coding	346.129	0.217035	0.0706126	3.0736	0.00211491	0.0243725	Ddx46
Mybbp1a/ENSMUSG00000040463.12/protein_coding	1024.58	0.179394	0.0583772	3.07301	0.0021191	0.0244035	Mybbp1a
Dgkg/ENSMUSG00000022861.12/protein_coding	9.65461	-0.279896	0.0911189	-3.07176	0.00212801	0.0244887	Dgkg
Srsf9/ENSMUSG00000029538.9/protein_coding	1579.07	0.146434	0.0476786	3.07128	0.00213146	0.0245111	Srsf9
Gm26816/ENSMUSG00000097380.1/lincRNA	66.7251	-0.314761	0.102535	-3.06979	0.0021421	0.024616	Gm26816
Dlgap1/ENSMUSG00000003279.12/protein_coding	4.98702	-0.275178	0.0896766	-3.06856	0.00215092	0.0246824	Dlgap1
Zpbp/ENSMUSG00000020193.3/protein_coding	13.5077	-0.331627	0.108071	-3.06861	0.00215058	0.0246824	Zpbp
Fbrs/ENSMUSG00000042423.7/protein_coding	215.637	0.27775	0.0905855	3.06617	0.00216821	0.0248107	Fbrs
Osbpl8/ENSMUSG00000020189.9/protein_coding	521.488	0.210005	0.0684871	3.06635	0.00216691	0.0248107	Osbpl8
Slc10a1/ENSMUSG00000021135.7/protein_coding	4.82488	0.258404	0.0842703	3.06637	0.00216673	0.0248107	Slc10a1
Tmem141/ENSMUSG00000026939.8/protein_coding	334.349	-0.24306	0.079256	-3.06677	0.00216386	0.0248107	Tmem141
Gins4/ENSMUSG00000031546.5/protein_coding	241.29	-0.205163	0.066925	-3.06557	0.00217252	0.0248426	Gins4
Dock4/ENSMUSG00000035954.9/protein_coding	2868.21	0.171347	0.0559032	3.06507	0.00217618	0.0248669	Dock4
Chordc1/ENSMUSG00000001774.7/protein_coding	656.728	0.24217	0.0790168	3.06479	0.00217826	0.0248732	Chordc1
Slc4a5/ENSMUSG00000068323.8/protein_coding	4.30566	-0.208752	0.0681392	-3.06361	0.00218682	0.0249534	Slc4a5
Yipf5/ENSMUSG00000024487.4/protein_coding	726.475	-0.180346	0.0588711	-3.0634	0.00218838	0.0249537	Yipf5
Mlf1/ENSMUSG00000048416.11/protein_coding	1.24951	-0.151708	0.0495365	-3.06256	0.00219456	0.0250066	Mlf1
Hsd17b10/ENSMUSG00000025260.6/protein_coding	187.367	-0.243242	0.0794401	-3.06196	0.00219896	0.0250313	Hsd17b10
Rab37/ENSMUSG00000020732.9/protein_coding	4.31773	-0.267117	0.0872407	-3.06184	0.00219981	0.0250313	Rab37
Lhfpl2/ENSMUSG00000045312.7/protein_coding	4951.02	0.150226	0.0490682	3.06158	0.00220173	0.0250356	Lhfpl2
Fam174a/ENSMUSG00000051185.9/protein_coding	627.533	-0.197477	0.0645292	-3.06027	0.00221137	0.0251276	Fam174a
Nit2/ENSMUSG00000022751.8/protein_coding	147.781	-0.295217	0.0964844	-3.05974	0.00221528	0.0251545	Nit2
1110058L19Rik/ENSMUSG00000026154.4/protein_coding	126.411	-0.266063	0.0869738	-3.05911	0.00221994	0.0251898	1110058L19Rik
Hist1h4m/ENSMUSG00000069306.5/protein_coding	8.42531	-0.29983	0.0980676	-3.05738	0.00223277	0.0253178	Hist1h4m
Ptprj/ENSMUSG00000025314.12/protein_coding	1745.31	0.264719	0.0865998	3.05681	0.00223707	0.0253311	Ptprj
Rnf13/ENSMUSG00000036503.9/protein_coding	5063.39	-0.200559	0.065608	-3.05693	0.00223619	0.0253311	Rnf13
Trappc6a/ENSMUSG00000002043.12/protein_coding	112.906	-0.312202	0.102154	-3.05618	0.00224178	0.0253667	Trappc6a
Tcf24/ENSMUSG00000099032.2/protein_coding	23.443	0.345318	0.113023	3.0553	0.00224832	0.0254231	Tcf24
Gm15500/ENSMUSG00000086583.3/transcribed_processed_pseudogene	362.768	-0.243439	0.0797093	-3.05408	0.0022575	0.025456	Gm15500
Klrg2/ENSMUSG00000071537.3/protein_coding	26.3748	0.343372	0.112408	3.05469	0.0022529	0.025456	Klrg2
Plxdc2/ENSMUSG00000026748.9/protein_coding	13689	0.162837	0.0533162	3.05418	0.00225675	0.025456	Plxdc2
Slc27a4/ENSMUSG00000059316.2/protein_coding	373.993	0.234083	0.0766398	3.05433	0.00225563	0.025456	Slc27a4
Cox5b/ENSMUSG00000061518.6/protein_coding	362.987	-0.18874	0.0618186	-3.05313	0.00226468	0.0255193	Cox5b
Rps25/ENSMUSG00000009927.8/protein_coding	823.555	-0.269593	0.0883498	-3.05143	0.00227753	0.0256462	Rps25
Gm11744/ENSMUSG00000075410.8/protein_coding	1.11387	-0.144369	0.047327	-3.05045	0.00228495	0.025712	Gm11744
Cenpt/ENSMUSG00000036672.4/protein_coding	75.4513	0.312135	0.10235	3.04969	0.00229075	0.0257594	Cenpt
Irf1/ENSMUSG00000018899.12/protein_coding	875.797	-0.211997	0.0695399	-3.04857	0.00229934	0.0258382	Irf1
Osbpl1a/ENSMUSG00000044252.13/protein_coding	335.124	-0.196595	0.0645022	-3.04788	0.00230463	0.0258797	Osbpl1a
Ccdc167/ENSMUSG00000024018.13/protein_coding	128.049	-0.246945	0.0810418	-3.04713	0.0023104	0.0259087	Ccdc167
Dph3/ENSMUSG00000021905.9/protein_coding	187.124	-0.253641	0.0832365	-3.04723	0.00230961	0.0259087	Dph3
Sf3a2/ENSMUSG00000020211.11/protein_coding	271.964	0.246576	0.0809529	3.04592	0.0023197	0.025995	Sf3a2
2310011J03Rik/ENSMUSG00000020133.8/protein_coding	403.206	-0.227919	0.0748681	-3.04427	0.00233245	0.026102	2310011J03Rik
Tnfrsf21/ENSMUSG00000023915.4/protein_coding	5623.06	0.14558	0.0478201	3.04432	0.00233204	0.026102	Tnfrsf21
Prrc2c/ENSMUSG00000040225.11/protein_coding	781.329	0.25647	0.0842649	3.04362	0.00233749	0.0261403	Prrc2c
Kdelc2/ENSMUSG00000034487.3/protein_coding	481.623	-0.26032	0.0855538	-3.04276	0.00234416	0.0261969	Kdelc2
Asap1/ENSMUSG00000022377.12/protein_coding	1299.08	0.151773	0.0499429	3.03894	0.00237412	0.0265033	Asap1
Lonp2/ENSMUSG00000047866.14/protein_coding	780.755	-0.155029	0.0510157	-3.03885	0.00237485	0.0265033	Lonp2
Brd2/ENSMUSG00000024335.15/protein_coding	1652.37	0.237743	0.0782482	3.03832	0.00237901	0.0265227	Brd2
Lamp2/ENSMUSG00000016534.11/protein_coding	10241.6	-0.160922	0.0529661	-3.03821	0.00237984	0.0265227	Lamp2
6030468B19Rik/ENSMUSG00000025573.4/protein_coding	101.682	0.276192	0.0909623	3.03633	0.00239476	0.0266706	6030468B19Rik
St8sia1/ENSMUSG00000030283.5/protein_coding	17.1516	0.335635	0.110547	3.03612	0.00239646	0.0266713	St8sia1
Dse/ENSMUSG00000039497.7/protein_coding	608.923	-0.198086	0.0652564	-3.03551	0.00240133	0.0267072	Dse
Timm22/ENSMUSG00000020843.11/protein_coding	255.063	-0.192431	0.0634076	-3.03483	0.00240672	0.0267488	Timm22
Suclg1/ENSMUSG00000052738.10/protein_coding	524.686	-0.165305	0.0544809	-3.03418	0.00241189	0.026788	Suclg1
Cd83/ENSMUSG00000015396.3/protein_coding	2552.43	-0.236039	0.0778151	-3.03334	0.00241866	0.0268082	Cd83
Pycard/ENSMUSG00000030793.3/protein_coding	1575.53	-0.207129	0.0682771	-3.03366	0.0024161	0.0268082	Pycard
Rdx/ENSMUSG00000032050.12/protein_coding	1163.53	-0.15662	0.0516329	-3.03334	0.00241864	0.0268082	Rdx
Runx2os2/ENSMUSG00000089849.1/antisense	2.04566	0.188793	0.0622513	3.03276	0.00242325	0.0268408	Runx2os2
Cript/ENSMUSG00000024146.5/protein_coding	441.033	-0.209231	0.0690074	-3.032	0.00242937	0.0268839	Cript
Ldlr/ENSMUSG00000032193.8/protein_coding	90.7407	-0.342474	0.112966	-3.03166	0.00243211	0.0268839	Ldlr
Ubr2/ENSMUSG00000023977.10/protein_coding	966.584	0.203342	0.0670716	3.03172	0.00243163	0.0268839	Ubr2
0610037L13Rik/ENSMUSG00000028608.11/protein_coding	1447.87	-0.232763	0.0767832	-3.03143	0.00243401	0.0268867	0610037L13Rik
Lpgat1/ENSMUSG00000026623.12/protein_coding	630.948	0.200655	0.0662165	3.03028	0.00244325	0.0269704	Lpgat1
Gm17275/ENSMUSG00000097347.1/lincRNA	21.426	0.328632	0.108469	3.02973	0.00244776	0.0269835	Gm17275
Osgep/ENSMUSG00000006289.10/protein_coding	815.938	-0.1949	0.0643279	-3.0298	0.00244719	0.0269835	Osgep
RP23-459L15.7/ENSMUSG00000104030.1/TEC	85.2023	0.331622	0.109482	3.02901	0.0024536	0.0270295	RP23-459L15.7
Bcl2l1/ENSMUSG00000007659.14/protein_coding	1334.49	-0.206369	0.0681391	-3.02864	0.00245656	0.0270438	Bcl2l1
Prps1/ENSMUSG00000031432.3/protein_coding	168.589	-0.238742	0.0788629	-3.0273	0.00246748	0.0271456	Prps1
Gsg1/ENSMUSG00000030206.9/protein_coding	68.2571	-0.310693	0.102666	-3.02627	0.00247595	0.0272203	Gsg1
Rmdn1/ENSMUSG00000028229.7/protein_coding	182.905	-0.249471	0.0824575	-3.02545	0.00248264	0.0272754	Rmdn1
I830077J02Rik/ENSMUSG00000074342.2/protein_coding	559.533	-0.228003	0.0753973	-3.02402	0.00249441	0.0273863	I830077J02Rik
Zfp120/ENSMUSG00000068134.9/protein_coding	684.456	-0.160539	0.0530934	-3.0237	0.002497	0.0273962	Zfp120
Fbxo3/ENSMUSG00000027180.8/protein_coding	661.993	-0.155366	0.0513934	-3.02307	0.00250224	0.0274352	Fbxo3
Tmem186/ENSMUSG00000043140.9/protein_coding	394.35	-0.174457	0.0577236	-3.02227	0.00250883	0.0274889	Tmem186
Ywhag/ENSMUSG00000051391.8/protein_coding	1225.24	0.19641	0.0649935	3.02199	0.00251116	0.0274958	Ywhag
Mrpl12/ENSMUSG00000039640.7/protein_coding	222.158	-0.266788	0.0883566	-3.01945	0.00253233	0.027709	Mrpl12
Slc50a1/ENSMUSG00000027953.9/protein_coding	805.572	-0.154503	0.0511761	-3.01904	0.00253577	0.0277279	Slc50a1
Ranbp2/ENSMUSG00000003226.6/protein_coding	906.851	0.175033	0.0579806	3.01882	0.00253764	0.0277297	Ranbp2
Gm26888/ENSMUSG00000097294.1/lincRNA	33.3137	0.338971	0.112378	3.01633	0.00255852	0.027904	Gm26888
Pla2g2d/ENSMUSG00000041202.8/protein_coding	11.4354	-0.321674	0.106645	-3.01631	0.00255874	0.027904	Pla2g2d
Rap1b/ENSMUSG00000052681.7/protein_coding	6442.48	-0.204082	0.0676591	-3.01633	0.00255857	0.027904	Rap1b
Gm16575/ENSMUSG00000089796.1/processed_transcript	55.2577	0.341394	0.113232	3.01499	0.00256991	0.028007	Gm16575
Gm14023/ENSMUSG00000085498.1/processed_transcript	156.732	0.316719	0.10507	3.01436	0.00257518	0.0280457	Gm14023
Ndufb11/ENSMUSG00000031059.9/protein_coding	286.013	-0.208186	0.0690857	-3.01345	0.00258299	0.0281119	Ndufb11
Tspan3/ENSMUSG00000032324.10/protein_coding	2018.59	-0.168563	0.0559464	-3.01293	0.00258734	0.0281216	Tspan3
Zfp871/ENSMUSG00000024298.10/protein_coding	1181.04	0.245356	0.0814333	3.01296	0.00258709	0.0281216	Zfp871
Cst3/ENSMUSG00000027447.6/protein_coding	178450	-0.12897	0.0428123	-3.01246	0.0025914	0.0281352	Cst3
Fam168a/ENSMUSG00000029461.11/protein_coding	612.183	0.254067	0.084341	3.01238	0.00259206	0.0281352	Fam168a
Dtymk/ENSMUSG00000026281.11/protein_coding	269.426	-0.23476	0.0779894	-3.01015	0.00261116	0.0283085	Dtymk
Nxt2/ENSMUSG00000042271.9/protein_coding	555.777	-0.180086	0.0598271	-3.01011	0.00261152	0.0283085	Nxt2
Acin1/ENSMUSG00000022185.14/protein_coding	606.986	0.195358	0.0649412	3.00822	0.0026278	0.0284661	Acin1
Hnrnpa1/ENSMUSG00000046434.11/protein_coding	377.095	0.220376	0.0732787	3.00737	0.00263518	0.0285271	Hnrnpa1
Adamts14/ENSMUSG00000059901.8/protein_coding	1.26409	-0.126274	0.0419986	-3.00662	0.00264166	0.0285591	Adamts14
Ubr4/ENSMUSG00000066036.10/protein_coding	735.192	0.272726	0.0907081	3.00663	0.00264162	0.0285591	Ubr4
P2ry1/ENSMUSG00000027765.2/protein_coding	1.39354	-0.163966	0.0545386	-3.00642	0.00264344	0.0285593	P2ry1
Antxr2/ENSMUSG00000029338.9/protein_coding	60.1884	-0.337165	0.112289	-3.00264	0.00267646	0.0288969	Antxr2
Haus5/ENSMUSG00000078762.6/protein_coding	161.823	-0.259833	0.086637	-2.9991	0.0027078	0.0291965	Haus5
Naip2/ENSMUSG00000078945.6/protein_coding	752.205	0.187728	0.0625946	2.9991	0.00270775	0.0291965	Naip2
Ccdc102a/ENSMUSG00000063605.5/protein_coding	63.0738	0.302731	0.100956	2.99864	0.00271189	0.0292211	Ccdc102a
4930599N23Rik/ENSMUSG00000073144.3/antisense	202.365	-0.275085	0.0917678	-2.99762	0.00272094	0.0292907	4930599N23Rik
Perp/ENSMUSG00000019851.7/protein_coding	34.7609	-0.339373	0.113221	-2.99744	0.00272253	0.0292907	Perp
Zfp869/ENSMUSG00000054648.7/protein_coding	482.905	-0.190842	0.0636711	-2.99731	0.00272375	0.0292907	Zfp869
Ap3b1/ENSMUSG00000021686.4/protein_coding	1129.88	0.166946	0.0557186	2.99624	0.00273335	0.0293745	Ap3b1
Abcd1/ENSMUSG00000031378.10/protein_coding	1828.28	0.143876	0.048036	2.99518	0.00274285	0.0294571	Abcd1
Lrch3/ENSMUSG00000022801.9/protein_coding	1024.72	0.199407	0.0665869	2.99469	0.00274722	0.0294845	Lrch3
Ccdc122/ENSMUSG00000034795.10/protein_coding	42.718	-0.334119	0.111648	-2.9926	0.00276609	0.0296675	Ccdc122
Ppard/ENSMUSG00000002250.11/protein_coding	67.1681	0.304072	0.101665	2.99092	0.00278138	0.0298118	Ppard
Ptpn7/ENSMUSG00000031506.7/protein_coding	13.8627	-0.325272	0.108783	-2.9901	0.00278885	0.0298557	Ptpn7
RP24-273P12.4/ENSMUSG00000102719.1/TEC	67.383	0.332667	0.111257	2.99007	0.00278915	0.0298557	RP24-273P12.4
Zfp444/ENSMUSG00000044876.10/protein_coding	191.166	0.216013	0.0722606	2.98936	0.00279565	0.0299055	Zfp444
Accs/ENSMUSG00000040272.10/protein_coding	660.536	-0.161151	0.0539252	-2.98843	0.00280419	0.0299578	Accs
Fam212b/ENSMUSG00000048458.8/protein_coding	8.74258	0.296908	0.0993594	2.98822	0.00280607	0.0299578	Fam212b
Nono/ENSMUSG00000031311.13/protein_coding	1571.64	0.13261	0.0443755	2.98835	0.00280485	0.0299578	Nono
A230046K03Rik/ENSMUSG00000034560.5/protein_coding	2144.96	0.196121	0.0656597	2.98694	0.00281787	0.0300641	A230046K03Rik
4833407H14Rik/ENSMUSG00000097779.1/lincRNA	20.2099	-0.294979	0.098838	-2.98448	0.00284065	0.0302872	4833407H14Rik
Ctso/ENSMUSG00000028015.3/protein_coding	2242.41	-0.247716	0.0830143	-2.98401	0.00284497	0.0302935	Ctso
Mcmbp/ENSMUSG00000048170.10/protein_coding	747.145	0.181336	0.0607673	2.98411	0.00284407	0.0302935	Mcmbp
Nek1/ENSMUSG00000031644.14/protein_coding	134.853	0.246067	0.0824727	2.98362	0.00284865	0.0303128	Nek1
Gch1/ENSMUSG00000037580.9/protein_coding	94.9503	0.271099	0.0908816	2.98299	0.00285447	0.0303218	Gch1
Hcfc1/ENSMUSG00000031386.10/protein_coding	1046	0.223965	0.0750805	2.983	0.00285437	0.0303218	Hcfc1
Timm17b/ENSMUSG00000031158.7/protein_coding	217.821	-0.233562	0.0782998	-2.98292	0.00285509	0.0303218	Timm17b
Sema4f/ENSMUSG00000000627.11/protein_coding	1.33076	-0.131717	0.0441777	-2.98152	0.00286825	0.0304417	Sema4f
Gm10138/ENSMUSG00000100954.2/antisense	86.2585	-0.307294	0.103143	-2.97929	0.00288916	0.0306435	Gm10138
Gm4070/ENSMUSG00000078606.4/protein_coding	1095.41	0.286293	0.0961161	2.97862	0.0028955	0.0306719	Gm4070
Oraov1/ENSMUSG00000031072.9/protein_coding	211.928	0.196174	0.0658609	2.97861	0.0028956	0.0306719	Oraov1
Arhgap5/ENSMUSG00000035133.8/protein_coding	6359.91	0.146807	0.0493331	2.97584	0.00292191	0.0309303	Arhgap5
Alcam/ENSMUSG00000022636.9/protein_coding	11.3425	-0.306615	0.103062	-2.97505	0.00292944	0.0309496	Alcam
Calm3/ENSMUSG00000019370.10/protein_coding	265.085	0.26103	0.0877346	2.97522	0.00292778	0.0309496	Calm3
Dnajc21/ENSMUSG00000044224.12/protein_coding	84.3456	0.2855	0.0959561	2.97532	0.00292684	0.0309496	Dnajc21
Cdc42bpa/ENSMUSG00000026490.13/protein_coding	164.893	0.243893	0.0820428	2.97275	0.00295145	0.0311619	Cdc42bpa
Mga/ENSMUSG00000033943.11/protein_coding	613.75	0.218968	0.0736644	2.97251	0.00295378	0.0311662	Mga
Chst11/ENSMUSG00000034612.7/protein_coding	100.076	0.305307	0.102727	2.97201	0.00295857	0.0311965	Chst11
Lrig3/ENSMUSG00000020105.8/protein_coding	201.432	0.278102	0.0935882	2.97155	0.00296301	0.0312169	Lrig3
Ptpn18/ENSMUSG00000026126.11/protein_coding	712.194	-0.204022	0.0686618	-2.97141	0.00296435	0.0312169	Ptpn18
Rd3/ENSMUSG00000049353.13/protein_coding	1.24235	-0.148221	0.0498911	-2.9709	0.00296931	0.0312489	Rd3
Mdn1/ENSMUSG00000058006.8/protein_coding	215.002	0.231626	0.0779761	2.97047	0.0029734	0.0312717	Mdn1
Bud31/ENSMUSG00000038722.13/protein_coding	340.583	-0.206719	0.0696528	-2.96784	0.00299898	0.0315	Bud31
Tcta/ENSMUSG00000039461.8/protein_coding	365.689	0.198634	0.0669269	2.96792	0.00299824	0.0315	Tcta
Rab11fip1/ENSMUSG00000031488.9/protein_coding	15.6498	-0.245305	0.0826602	-2.96764	0.00300099	0.0315007	Rab11fip1
Hhex/ENSMUSG00000024986.7/protein_coding	1316.74	0.189492	0.0638781	2.96647	0.00301238	0.0315992	Hhex
Pydc4/ENSMUSG00000073491.6/protein_coding	31.9142	-0.335905	0.113241	-2.96628	0.00301426	0.0315992	Pydc4
Rcor1/ENSMUSG00000037896.13/protein_coding	615.518	0.181661	0.0612559	2.96561	0.00302081	0.0316474	Rcor1
Sox9/ENSMUSG00000000567.5/protein_coding	2.90135	-0.205515	0.0693247	-2.96452	0.00303154	0.0317394	Sox9
Eif4g3/ENSMUSG00000028760.12/protein_coding	1035.1	0.17606	0.0594055	2.9637	0.00303964	0.0317851	Eif4g3
Usp47/ENSMUSG00000059263.7/protein_coding	864.115	0.162302	0.0547636	2.96368	0.00303982	0.0317851	Usp47
Acta2/ENSMUSG00000035783.8/protein_coding	1.58515	-0.166773	0.0562786	-2.96335	0.0030431	0.031799	Acta2
Pdgfb/ENSMUSG00000000489.6/protein_coding	953.834	0.243279	0.0821038	2.96307	0.0030459	0.0318077	Pdgfb
Fam58b/ENSMUSG00000049489.5/protein_coding	341.409	-0.213652	0.0721661	-2.96055	0.00307086	0.0320478	Fam58b
Arpc4/ENSMUSG00000079426.8/protein_coding	3591.96	-0.116461	0.0393509	-2.95956	0.00308083	0.0321106	Arpc4
Hk2/ENSMUSG00000000628.6/protein_coding	1043.18	0.259749	0.0877628	2.95966	0.00307974	0.0321106	Hk2
Bbc3/ENSMUSG00000002083.8/protein_coding	112.052	0.260187	0.0879674	2.95776	0.00309883	0.0322568	Bbc3
RP23-16D16.12/ENSMUSG00000102939.1/TEC	13.9466	0.322928	0.109173	2.95795	0.00309696	0.0322568	RP23-16D16.12
Glrx3/ENSMUSG00000031068.7/protein_coding	458.901	-0.205067	0.0693522	-2.95689	0.00310756	0.032265	Glrx3
Myo9b/ENSMUSG00000004677.11/protein_coding	1389.52	0.180516	0.0610474	2.95698	0.00310665	0.032265	Myo9b
Rpl32/ENSMUSG00000057841.3/protein_coding	567.516	-0.250661	0.0847646	-2.95714	0.00310502	0.032265	Rpl32
Sfr1/ENSMUSG00000025066.9/protein_coding	488.897	0.172734	0.0584123	2.95716	0.00310488	0.032265	Sfr1
Tmem192/ENSMUSG00000025521.10/protein_coding	182.59	-0.220144	0.0744742	-2.95598	0.00311678	0.0323401	Tmem192
Nubp1/ENSMUSG00000022503.6/protein_coding	608.434	-0.234934	0.0795	-2.95515	0.00312517	0.0324064	Nubp1
Ipcef1/ENSMUSG00000064065.11/protein_coding	209.084	0.30426	0.103051	2.95251	0.00315197	0.0326635	Ipcef1
RP24-271M20.3/ENSMUSG00000102151.1/TEC	289.206	0.270792	0.0917258	2.95219	0.00315531	0.0326773	RP24-271M20.3
Ndufb7/ENSMUSG00000033938.5/protein_coding	269.273	-0.230614	0.0781221	-2.95197	0.00315754	0.0326796	Ndufb7
Cd22/ENSMUSG00000030577.9/protein_coding	123.588	-0.307919	0.104332	-2.95135	0.00316387	0.0327243	Cd22
Rps6ka5/ENSMUSG00000021180.8/protein_coding	251.983	0.224401	0.0760496	2.95072	0.00317032	0.0327303	Rps6ka5
Sept9/ENSMUSG00000059248.9/protein_coding	202.94	-0.287316	0.0973718	-2.9507	0.0031705	0.0327303	2016-09-09
Tyms/ENSMUSG00000025747.8/protein_coding	147.437	-0.27301	0.0925188	-2.95086	0.00316886	0.0327303	Tyms
Fam107a/ENSMUSG00000021750.11/protein_coding	3.18288	-0.231964	0.0786577	-2.94903	0.00318776	0.0328876	Fam107a
Mrpl50/ENSMUSG00000044018.3/protein_coding	284.881	-0.225638	0.076534	-2.94821	0.00319621	0.0329538	Mrpl50
Rbm6/ENSMUSG00000032582.10/protein_coding	886.794	0.157373	0.0534274	2.94556	0.00322372	0.0332163	Rbm6
Prorsd1/ENSMUSG00000032673.5/protein_coding	213.357	-0.236229	0.0802487	-2.94371	0.003243	0.0333727	Prorsd1
Trim65/ENSMUSG00000054517.5/protein_coding	592.18	0.225298	0.0765342	2.94376	0.0032425	0.0333727	Trim65
Exoc5/ENSMUSG00000061244.9/protein_coding	1012.85	0.159744	0.0543033	2.9417	0.00326419	0.0335695	Exoc5
Cxcr4/ENSMUSG00000045382.6/protein_coding	14.0914	-0.264075	0.0898507	-2.93904	0.00329231	0.0338373	Cxcr4
Fkbp9/ENSMUSG00000029781.7/protein_coding	543.569	-0.193338	0.0658225	-2.93727	0.00331118	0.0340088	Fkbp9
RP23-84E4.3/ENSMUSG00000103151.1/TEC	23.3124	0.322588	0.109833	2.93708	0.00331318	0.0340088	RP23-84E4.3
Cdc42bpb/ENSMUSG00000021279.4/protein_coding	204.194	0.252097	0.08584	2.93683	0.00331588	0.034015	Cdc42bpb
Atp6v1g1/ENSMUSG00000039105.6/protein_coding	1444.3	-0.185676	0.0632516	-2.93551	0.00332999	0.0340351	Atp6v1g1
Hnrnpd/ENSMUSG00000000568.11/protein_coding	891.871	0.186869	0.0636483	2.93596	0.00332518	0.0340351	Hnrnpd
Hprt/ENSMUSG00000025630.8/protein_coding	1214.78	-0.192081	0.0654308	-2.93563	0.00332867	0.0340351	Hprt
March6/ENSMUSG00000039100.9/protein_coding	414.298	0.194035	0.0660957	2.93566	0.00332838	0.0340351	2016-03-06
Scn11a/ENSMUSG00000034115.9/protein_coding	1.78995	-0.177626	0.0605103	-2.93547	0.00333041	0.0340351	Scn11a
Unc50/ENSMUSG00000026111.11/protein_coding	1072.57	-0.202524	0.0689764	-2.93614	0.0033233	0.0340351	Unc50
Phb/ENSMUSG00000038845.7/protein_coding	446.269	-0.221848	0.0755882	-2.93496	0.00333592	0.03407	Phb
Clec4e/ENSMUSG00000030142.6/protein_coding	25.8385	-0.193684	0.0660135	-2.93401	0.00334617	0.0341317	Clec4e
Mon2/ENSMUSG00000034602.9/protein_coding	428.22	0.228388	0.077837	2.93418	0.00334426	0.0341317	Mon2
Lca5/ENSMUSG00000032258.11/protein_coding	20.9312	0.331524	0.113093	2.93144	0.00337392	0.0343933	Lca5
Ankrd44/ENSMUSG00000052331.10/protein_coding	2306.44	0.148345	0.0506173	2.93073	0.00338172	0.0344511	Ankrd44
Wdr26/ENSMUSG00000038733.9/protein_coding	1026.15	0.196797	0.067198	2.92861	0.00340477	0.0346642	Wdr26
Tmem70/ENSMUSG00000025940.6/protein_coding	444.648	-0.189226	0.0646178	-2.92839	0.00340722	0.0346675	Tmem70
Gpsm3/ENSMUSG00000034786.13/protein_coding	478.697	0.198203	0.0677018	2.92759	0.00341595	0.0347128	Gpsm3
RP23-209N14.4/ENSMUSG00000102448.1/TEC	30.3582	0.328054	0.112049	2.92776	0.0034141	0.0347128	RP23-209N14.4
Crtc1/ENSMUSG00000003575.9/protein_coding	207.946	0.220707	0.075395	2.92735	0.00341868	0.0347188	Crtc1
Zfp397/ENSMUSG00000024276.6/protein_coding	535.597	-0.185626	0.0634167	-2.92709	0.0034215	0.0347258	Zfp397
Cd209g/ENSMUSG00000079168.3/protein_coding	12.2105	-0.293401	0.100276	-2.92595	0.00343408	0.0348316	Cd209g
Entpd6/ENSMUSG00000033068.12/protein_coding	432.257	-0.169879	0.0580737	-2.92523	0.00344201	0.0348686	Entpd6
Smg1/ENSMUSG00000030655.10/protein_coding	1060.49	0.224065	0.076593	2.9254	0.00344017	0.0348686	Smg1
1110034G24Rik/ENSMUSG00000044991.6/protein_coding	139.923	-0.261316	0.0893431	-2.92486	0.00344613	0.0348886	1110034G24Rik
Qdpr/ENSMUSG00000015806.8/protein_coding	366.278	-0.215142	0.0735685	-2.92437	0.00345152	0.0349214	Qdpr
Fam214b/ENSMUSG00000036002.8/protein_coding	372.04	0.201618	0.0689598	2.9237	0.00345893	0.0349745	Fam214b
Mrpl54/ENSMUSG00000034932.4/protein_coding	95.2101	-0.284721	0.0974188	-2.92265	0.00347065	0.0350495	Mrpl54
Zfp958/ENSMUSG00000058748.5/protein_coding	155.703	-0.233809	0.0799985	-2.92267	0.00347049	0.0350495	Zfp958
Bnip3l/ENSMUSG00000022051.11/protein_coding	1409.1	-0.130957	0.0448133	-2.92227	0.00347494	0.0350514	Bnip3l
Calm2/ENSMUSG00000036438.8/protein_coding	6496.94	-0.1419	0.0485586	-2.92225	0.00347516	0.0350514	Calm2
Atp5f1/ENSMUSG00000000563.13/protein_coding	1410.6	-0.167156	0.0572247	-2.92106	0.00348847	0.0350819	Atp5f1
Csmd3/ENSMUSG00000022311.11/protein_coding	1694.8	0.295191	0.101058	2.92101	0.00348897	0.0350819	Csmd3
Larp1/ENSMUSG00000037331.11/protein_coding	1236.79	0.179115	0.061305	2.92169	0.00348134	0.0350819	Larp1
Pepd/ENSMUSG00000063931.10/protein_coding	1090.74	-0.145912	0.0499498	-2.92117	0.00348716	0.0350819	Pepd
Psen1/ENSMUSG00000019969.9/protein_coding	2400.93	0.139907	0.047892	2.9213	0.00348571	0.0350819	Psen1
Zfp316/ENSMUSG00000046658.12/protein_coding	145.156	0.271952	0.0931837	2.91845	0.00351774	0.0353492	Zfp316
Mien1/ENSMUSG00000002580.7/protein_coding	205.564	-0.266995	0.0915078	-2.91773	0.00352592	0.0354095	Mien1
Chrac1/ENSMUSG00000068391.4/protein_coding	310.609	-0.225178	0.077196	-2.91697	0.00353451	0.0354105	Chrac1
Gm6297/ENSMUSG00000097123.1/lincRNA	31.326	-0.329081	0.112806	-2.91723	0.00353151	0.0354105	Gm6297
Lsm3/ENSMUSG00000034192.4/protein_coding	173.204	-0.252666	0.0866201	-2.91695	0.00353473	0.0354105	Lsm3
Sri/ENSMUSG00000003161.11/protein_coding	645.68	-0.156194	0.0535389	-2.91739	0.00352977	0.0354105	Sri
Gpr126/ENSMUSG00000039116.4/protein_coding	2.0094	-0.155433	0.0533175	-2.91523	0.00355427	0.0355843	Gpr126
Numa1/ENSMUSG00000066306.8/protein_coding	2150.48	0.205752	0.0705961	2.91449	0.00356268	0.0356465	Numa1
Fam132b/ENSMUSG00000047443.10/protein_coding	0.869761	0.118908	0.0408107	2.91365	0.00357232	0.035721	Fam132b
Ncoa3/ENSMUSG00000027678.13/protein_coding	1548.29	0.185586	0.0637081	2.91307	0.00357889	0.0357647	Ncoa3
Crtc2/ENSMUSG00000027936.14/protein_coding	620.575	0.157155	0.0539554	2.91268	0.00358338	0.0357876	Crtc2
Tnfsf10/ENSMUSG00000039304.7/protein_coding	114.616	-0.289049	0.0992517	-2.91228	0.00358802	0.0358118	Tnfsf10
Lrp8/ENSMUSG00000028613.10/protein_coding	4.53795	-0.242948	0.0834529	-2.9112	0.00360043	0.0359137	Lrp8
Naa60/ENSMUSG00000005982.9/protein_coding	1162.71	0.147961	0.0508389	2.91039	0.00360974	0.0359632	Naa60
Snrnp48/ENSMUSG00000021431.10/protein_coding	93.0057	0.288156	0.0990094	2.91039	0.00360982	0.0359632	Snrnp48
Mrps17/ENSMUSG00000034211.10/protein_coding	500.903	-0.213896	0.0735171	-2.90947	0.00362047	0.0360472	Mrps17
Ccdc141/ENSMUSG00000044033.12/protein_coding	0.862087	-0.118024	0.0405872	-2.90791	0.00363852	0.0362047	Ccdc141
Fip1l1/ENSMUSG00000029227.11/protein_coding	840.033	0.12148	0.041814	2.90525	0.00366965	0.0364698	Fip1l1
Prkx/ENSMUSG00000035725.9/protein_coding	554.195	0.203081	0.0698977	2.90541	0.00366777	0.0364698	Prkx
Ear1/ENSMUSG00000072601.4/protein_coding	5.29107	-0.108893	0.0374857	-2.90493	0.0036734	0.0364702	Ear1
Prg2/ENSMUSG00000027073.5/protein_coding	12.9151	-0.109507	0.0376977	-2.90486	0.00367418	0.0364702	Prg2
Hck/ENSMUSG00000003283.9/protein_coding	2888.24	0.139852	0.0481542	2.90424	0.00368142	0.0365197	Hck
Mrpl53/ENSMUSG00000030037.8/protein_coding	131.039	-0.249462	0.0859295	-2.9031	0.00369492	0.0366177	Mrpl53
Zfp395/ENSMUSG00000034522.9/protein_coding	66.8706	0.29041	0.100037	2.90302	0.0036958	0.0366177	Zfp395
Cds1/ENSMUSG00000029330.8/protein_coding	1199.31	0.147882	0.0509464	2.90269	0.00369974	0.0366344	Cds1
Emid1/ENSMUSG00000034164.13/protein_coding	0.997345	-0.129892	0.0447593	-2.90201	0.00370782	0.0366921	Emid1
Polr3h/ENSMUSG00000022476.7/protein_coding	122.844	-0.274571	0.0946719	-2.90024	0.00372876	0.0368769	Polr3h
Heatr5a/ENSMUSG00000035181.5/protein_coding	1614.85	0.221275	0.0763189	2.89935	0.00373939	0.0369594	Heatr5a
Mfhas1/ENSMUSG00000070056.5/protein_coding	868.167	0.212935	0.0734478	2.89914	0.0037419	0.0369617	Mfhas1
Gda/ENSMUSG00000058624.8/protein_coding	19.577	-0.221305	0.0763584	-2.89824	0.00375265	0.0370454	Gda
Gm11827/ENSMUSG00000086765.3/lincRNA	10.4753	-0.312845	0.107958	-2.89784	0.00375744	0.0370702	Gm11827
Tufm/ENSMUSG00000073838.6/protein_coding	413.1	0.188771	0.0651534	2.89733	0.00376348	0.0371073	Tufm
Zcchc6/ENSMUSG00000035248.8/protein_coding	1010.06	0.159913	0.0552179	2.89604	0.00377907	0.0372384	Zcchc6
Smpdl3a/ENSMUSG00000019872.9/protein_coding	380.993	-0.268025	0.0925799	-2.89507	0.00379079	0.0373312	Smpdl3a
Fuca2/ENSMUSG00000019810.11/protein_coding	1885.29	-0.165996	0.057359	-2.89398	0.00380395	0.0373702	Fuca2
Rapgef6/ENSMUSG00000037533.13/protein_coding	1160.06	0.177431	0.0612985	2.89454	0.00379712	0.0373702	Rapgef6
Sdf4/ENSMUSG00000029076.10/protein_coding	2062.19	-0.120605	0.0416728	-2.8941	0.00380242	0.0373702	Sdf4
Slc12a6/ENSMUSG00000027130.11/protein_coding	2970.04	0.146042	0.0504586	2.8943	0.00380005	0.0373702	Slc12a6
Postn/ENSMUSG00000027750.12/protein_coding	169.758	-0.245483	0.0848726	-2.89237	0.00382345	0.0375391	Postn
Pabpc1/ENSMUSG00000022283.10/protein_coding	843.283	0.231701	0.0801424	2.89111	0.00383882	0.0376672	Pabpc1
Ikzf1/ENSMUSG00000018654.13/protein_coding	2738.91	0.195484	0.0676384	2.89013	0.00385084	0.0377624	Ikzf1
Vdac1/ENSMUSG00000020402.7/protein_coding	582.984	0.206592	0.0714968	2.88952	0.00385829	0.0378126	Vdac1
Kcp/ENSMUSG00000059022.10/protein_coding	57.3926	0.31496	0.109036	2.88859	0.00386969	0.0379015	Kcp
RP23-250G8.14/ENSMUSG00000103970.1/TEC	1.73885	0.168274	0.0582602	2.88832	0.00387308	0.0379118	RP23-250G8.14
Rbm38/ENSMUSG00000027510.13/protein_coding	80.4679	0.293136	0.101502	2.88798	0.00387729	0.0379147	Rbm38
Xaf1/ENSMUSG00000040483.11/protein_coding	138.311	0.216156	0.0748485	2.88792	0.00387803	0.0379147	Xaf1
Eef1b2/ENSMUSG00000025967.12/protein_coding	280.634	-0.227565	0.0788388	-2.88646	0.00389608	0.0380454	Eef1b2
Gm3488/ENSMUSG00000095295.4/protein_coding	322.276	-0.32429	0.112347	-2.88651	0.00389542	0.0380454	Gm3488
Actb/ENSMUSG00000029580.10/protein_coding	28767.3	0.254786	0.088308	2.88519	0.00391174	0.0381753	Actb
Cd36/ENSMUSG00000002944.11/protein_coding	108.129	-0.318601	0.110438	-2.88488	0.00391565	0.0381906	Cd36
Cope/ENSMUSG00000055681.10/protein_coding	1501.58	-0.170786	0.0592073	-2.88454	0.0039198	0.038208	Cope
Plxnd1/ENSMUSG00000030123.11/protein_coding	21.0252	-0.321499	0.11149	-2.88365	0.00393091	0.0382934	Plxnd1
Ino80/ENSMUSG00000034154.11/protein_coding	91.5356	0.30036	0.104178	2.88315	0.00393725	0.0383322	Ino80
Ankrd13b/ENSMUSG00000037907.12/protein_coding	27.5613	0.326669	0.113351	2.88193	0.00395252	0.0384578	Ankrd13b
Cnp/ENSMUSG00000006782.12/protein_coding	902.283	0.133509	0.0463434	2.88087	0.00396573	0.0385527	Cnp
Plscr4/ENSMUSG00000032377.8/protein_coding	1.01197	-0.125069	0.0434151	-2.88077	0.00396702	0.0385527	Plscr4
2810039B14Rik/ENSMUSG00000099034.3/unitary_pseudogene	52.5996	-0.30801	0.106939	-2.88023	0.00397385	0.038596	2810039B14Rik
Atp5j/ENSMUSG00000022890.9/protein_coding	723.093	-0.176353	0.0612355	-2.87991	0.00397791	0.0386124	Atp5j
Scpep1/ENSMUSG00000000278.10/protein_coding	1356.21	-0.118988	0.0413235	-2.87943	0.00398389	0.0386473	Scpep1
Rps27rt/ENSMUSG00000050621.6/protein_coding	106.303	-0.272038	0.0944835	-2.87921	0.00398667	0.0386512	Rps27rt
Aga/ENSMUSG00000031521.4/protein_coding	672.637	-0.168627	0.058593	-2.87794	0.00400285	0.0386938	Aga
Atf1/ENSMUSG00000023027.8/protein_coding	347.086	0.209425	0.0727898	2.87713	0.00401314	0.0386938	Atf1
Ccdc17/ENSMUSG00000034035.14/protein_coding	106.18	-0.283505	0.0985208	-2.87761	0.00400697	0.0386938	Ccdc17
Fdx1/ENSMUSG00000032051.8/protein_coding	57.5673	-0.297626	0.103448	-2.87705	0.0040141	0.0386938	Fdx1
Gdi2/ENSMUSG00000021218.9/protein_coding	5758.57	0.162428	0.0564534	2.8772	0.00401217	0.0386938	Gdi2
Ildr1/ENSMUSG00000022900.10/protein_coding	89.518	-0.273545	0.0950804	-2.87699	0.00401488	0.0386938	Ildr1
Naca/ENSMUSG00000061315.9/protein_coding	833.972	-0.151385	0.0526055	-2.87774	0.00400539	0.0386938	Naca
Spag6/ENSMUSG00000022783.7/protein_coding	1.38931	-0.137158	0.0476719	-2.87712	0.00401329	0.0386938	Spag6
Syncrip/ENSMUSG00000032423.8/protein_coding	642.403	0.181577	0.0630941	2.87788	0.00400355	0.0386938	Syncrip
Tcf20/ENSMUSG00000041852.10/protein_coding	54.828	0.320649	0.111393	2.87854	0.00399526	0.0386938	Tcf20
Siva1/ENSMUSG00000064326.8/protein_coding	81.843	-0.287738	0.100042	-2.87617	0.00402534	0.0387717	Siva1
Islr/ENSMUSG00000037206.10/protein_coding	0.83855	-0.123182	0.0428406	-2.87536	0.00403573	0.0388487	Islr
Clec5a/ENSMUSG00000029915.10/protein_coding	1654.43	-0.158716	0.0552114	-2.8747	0.00404414	0.0388605	Clec5a
E2f4/ENSMUSG00000014859.8/protein_coding	612.309	0.135726	0.0472122	2.87481	0.00404277	0.0388605	E2f4
Scaf11/ENSMUSG00000033228.7/protein_coding	1228.56	0.163072	0.0567225	2.87491	0.00404149	0.0388605	Scaf11
Kansl1/ENSMUSG00000018412.12/protein_coding	1487.16	0.151935	0.0528579	2.8744	0.00404795	0.0388742	Kansl1
Araf/ENSMUSG00000001127.8/protein_coding	1160.1	-0.146572	0.0510079	-2.87351	0.00405933	0.0389374	Araf
Slc1a2/ENSMUSG00000005089.11/protein_coding	4.4592	-0.227354	0.0791197	-2.87355	0.00405893	0.0389374	Slc1a2
Cse1l/ENSMUSG00000002718.10/protein_coding	988.197	0.141672	0.0493116	2.873	0.0040659	0.0389571	Cse1l
Tceb1/ENSMUSG00000079658.5/protein_coding	594.25	-0.177687	0.0618474	-2.87298	0.00406617	0.0389571	Tceb1
Arl8a/ENSMUSG00000026426.6/protein_coding	941.67	0.163793	0.057016	2.87275	0.00406913	0.0389625	Arl8a
4930563E22Rik/ENSMUSG00000053574.4/processed_transcript	24.3214	-0.318646	0.110993	-2.87087	0.00409346	0.0391623	4930563E22Rik
Prpf8/ENSMUSG00000020850.10/protein_coding	934.534	0.274295	0.0955476	2.87076	0.00409482	0.0391623	Prpf8
Rbbp5/ENSMUSG00000026439.10/protein_coding	467.49	0.177944	0.062043	2.86808	0.00412973	0.039473	Rbbp5
Ogfod1/ENSMUSG00000033009.11/protein_coding	171.533	0.239691	0.0836057	2.86692	0.00414481	0.0395706	Ogfod1
Sdhaf1/ENSMUSG00000074211.4/protein_coding	147.289	-0.266797	0.0930584	-2.86698	0.00414405	0.0395706	Sdhaf1
Hnrnpa3/ENSMUSG00000059005.9/protein_coding	509.322	0.227687	0.0794477	2.86587	0.00415866	0.0396795	Hnrnpa3
Capn15/ENSMUSG00000037326.9/protein_coding	262.907	0.20027	0.069922	2.86418	0.00418087	0.0398445	Capn15
Pram1/ENSMUSG00000032739.12/protein_coding	9.47697	-0.238053	0.0831107	-2.86429	0.00417944	0.0398445	Pram1
Apoa1bp/ENSMUSG00000028070.7/protein_coding	637.596	-0.203076	0.0709173	-2.86356	0.00418914	0.0399	Apoa1bp
Tjp1/ENSMUSG00000030516.10/protein_coding	2190.89	0.252254	0.088154	2.86151	0.00421623	0.0401345	Tjp1
Sepw1/ENSMUSG00000041571.9/protein_coding	108.021	-0.268903	0.0940163	-2.86017	0.00423409	0.0402809	Sepw1
Npepps/ENSMUSG00000001441.9/protein_coding	353.976	0.20359	0.0712124	2.85891	0.00425099	0.0403943	Npepps
Ppp2r1a/ENSMUSG00000007564.10/protein_coding	1619.51	0.13662	0.0477861	2.85899	0.00424991	0.0403943	Ppp2r1a
Cdc23/ENSMUSG00000024370.12/protein_coding	735.436	-0.155106	0.0542595	-2.8586	0.0042551	0.0403956	Cdc23
Pan3/ENSMUSG00000029647.11/protein_coding	668.792	0.237706	0.0831568	2.85853	0.00425609	0.0403956	Pan3
Fam222b/ENSMUSG00000037750.12/protein_coding	340.973	0.187949	0.0657658	2.85786	0.00426512	0.0404157	Fam222b
Kpna3/ENSMUSG00000021929.8/protein_coding	1329.37	0.161267	0.0564339	2.85763	0.00426816	0.0404157	Kpna3
Tln1/ENSMUSG00000028465.12/protein_coding	4676.01	0.192816	0.0674641	2.85806	0.00426246	0.0404157	Tln1
Ypel2/ENSMUSG00000018427.7/protein_coding	106.114	0.253201	0.0886033	2.8577	0.00426726	0.0404157	Ypel2
Alox5/ENSMUSG00000025701.8/protein_coding	734.686	0.193208	0.0676227	2.85714	0.00427475	0.0404283	Alox5
Lipe/ENSMUSG00000003123.11/protein_coding	579.42	0.156155	0.0546556	2.85708	0.00427563	0.0404283	Lipe
Zfp119b/ENSMUSG00000062101.8/protein_coding	191.291	-0.228467	0.079968	-2.85698	0.00427696	0.0404283	Zfp119b
Aff1/ENSMUSG00000029313.14/protein_coding	478.24	0.240408	0.0842145	2.85471	0.00430759	0.0406942	Aff1
Coa4/ENSMUSG00000044881.6/protein_coding	142.054	-0.259764	0.0910155	-2.85406	0.00431642	0.040754	Coa4
4930525G20Rik/ENSMUSG00000097276.1/antisense	4.27184	-0.246537	0.0864178	-2.85285	0.00433286	0.0408853	4930525G20Rik
AI846148/ENSMUSG00000024970.4/protein_coding	118.23	-0.236829	0.0830289	-2.85237	0.00433951	0.0409031	AI846148
Setd5/ENSMUSG00000034269.8/protein_coding	567.282	0.258162	0.0905088	2.85235	0.00433977	0.0409031	Setd5
Timm23/ENSMUSG00000013701.8/protein_coding	589.424	-0.215302	0.0755016	-2.85162	0.00434971	0.040973	Timm23
Vapb/ENSMUSG00000054455.4/protein_coding	271.167	0.292398	0.102548	2.85133	0.00435373	0.0409871	Vapb
Sap30/ENSMUSG00000031609.3/protein_coding	155.106	-0.25536	0.0895657	-2.85109	0.00435701	0.0409942	Sap30
Bcl7c/ENSMUSG00000030814.13/protein_coding	123.967	0.233547	0.0819237	2.85079	0.00436106	0.0410086	Bcl7c
Rmnd5a/ENSMUSG00000002222.10/protein_coding	507	0.246462	0.0864625	2.85051	0.00436498	0.0410217	Rmnd5a
Cd163/ENSMUSG00000008845.5/protein_coding	124.306	-0.318952	0.11194	-2.84932	0.00438128	0.0411274	Cd163
Cnot6l/ENSMUSG00000034724.13/protein_coding	521.057	0.233948	0.0821019	2.84949	0.00437899	0.0411274	Cnot6l
Eif4e3/ENSMUSG00000093661.1/protein_coding	222.915	0.244701	0.0859066	2.84845	0.00439328	0.0412162	Eif4e3
Tmem140/ENSMUSG00000057137.5/protein_coding	741.702	-0.158883	0.0558073	-2.847	0.00441336	0.0413807	Tmem140
Mrps15/ENSMUSG00000028861.9/protein_coding	323.492	0.17023	0.0598495	2.8443	0.00445098	0.0417093	Mrps15
Ccr7/ENSMUSG00000037944.8/protein_coding	3.81612	-0.175647	0.061762	-2.84393	0.00445604	0.0417327	Ccr7
Lin52/ENSMUSG00000085793.1/protein_coding	186.258	-0.210911	0.0741737	-2.84347	0.00446256	0.0417697	Lin52
Lrp1/ENSMUSG00000040249.11/protein_coding	7905.32	0.237716	0.0836115	2.8431	0.00446765	0.0417932	Lrp1
Ap1m1/ENSMUSG00000003033.10/protein_coding	838.623	0.136494	0.0480127	2.84288	0.00447086	0.0417992	Ap1m1
Cnn2/ENSMUSG00000004665.6/protein_coding	350.64	-0.261363	0.0919756	-2.84165	0.00448802	0.0419355	Cnn2
Txk/ENSMUSG00000054892.10/protein_coding	1.52495	-0.124745	0.043907	-2.84112	0.00449551	0.0419572	Txk
Yif1b/ENSMUSG00000030588.7/protein_coding	635.701	-0.138822	0.0488607	-2.84118	0.00449463	0.0419572	Yif1b
Pam/ENSMUSG00000026335.12/protein_coding	6.01408	-0.267517	0.0941706	-2.84077	0.00450044	0.0419792	Pam
Cyfip2/ENSMUSG00000020340.12/protein_coding	57.8973	-0.232354	0.0818316	-2.83941	0.00451966	0.0421342	Cyfip2
Cecr2/ENSMUSG00000071226.7/protein_coding	14.4276	-0.315114	0.111017	-2.83843	0.00453356	0.0422396	Cecr2
Pafah1b1/ENSMUSG00000020745.11/protein_coding	685.344	0.227707	0.0802533	2.83736	0.00454886	0.0423417	Pafah1b1
Prrc2b/ENSMUSG00000039262.12/protein_coding	423.648	0.269127	0.0948532	2.8373	0.00454973	0.0423417	Prrc2b
Tmco1/ENSMUSG00000052428.6/protein_coding	1164.58	-0.194582	0.0686109	-2.83601	0.00456803	0.0424877	Tmco1
1700123O20Rik/ENSMUSG00000040822.6/protein_coding	349.865	-0.202335	0.0713867	-2.83435	0.00459187	0.0426742	1700123O20Rik
Gm3239/ENSMUSG00000090872.4/protein_coding	31.1817	-0.320535	0.113096	-2.83419	0.00459415	0.0426742	Gm3239
RP23-146N3.2/ENSMUSG00000102703.1/TEC	12.3712	-0.289934	0.102303	-2.83407	0.00459596	0.0426742	RP23-146N3.2
Cradd/ENSMUSG00000045867.9/protein_coding	139.976	-0.247223	0.0872517	-2.83344	0.00460494	0.0427029	Cradd
Gcsh/ENSMUSG00000034424.5/protein_coding	148.699	-0.228356	0.0805925	-2.83347	0.00460458	0.0427029	Gcsh
Rapgef4/ENSMUSG00000049044.12/protein_coding	8.50029	-0.270184	0.0953601	-2.83331	0.00460694	0.0427029	Rapgef4
Eif4b/ENSMUSG00000058655.8/protein_coding	647.87	0.193652	0.0683823	2.8319	0.00462728	0.0427938	Eif4b
Golga7/ENSMUSG00000015341.12/protein_coding	1152.63	-0.142628	0.0503571	-2.83232	0.00462114	0.0427938	Golga7
Il13ra1/ENSMUSG00000017057.9/protein_coding	3881.83	-0.174288	0.0615444	-2.83191	0.00462704	0.0427938	Il13ra1
Rbm10/ENSMUSG00000031060.12/protein_coding	409.595	0.176196	0.062215	2.83205	0.00462499	0.0427938	Rbm10
Atp5c1/ENSMUSG00000025781.10/protein_coding	1196.73	-0.181941	0.0642601	-2.83132	0.00463563	0.0428092	Atp5c1
Ly6e/ENSMUSG00000022587.10/protein_coding	10031.4	0.15737	0.0555785	2.83149	0.00463321	0.0428092	Ly6e
Tgfbi/ENSMUSG00000035493.9/protein_coding	855.106	-0.191576	0.0676651	-2.83124	0.00463685	0.0428092	Tgfbi
Dda1/ENSMUSG00000074247.6/protein_coding	705.713	0.1413	0.0499158	2.83076	0.00464377	0.0428487	Dda1
Olfr111/ENSMUSG00000090675.1/protein_coding	18.3478	-0.308608	0.109058	-2.82977	0.00465816	0.0429205	Olfr111
Sh3bgrl/ENSMUSG00000031246.10/protein_coding	140.814	-0.291628	0.103062	-2.82964	0.0046601	0.0429205	Sh3bgrl
Tlr5/ENSMUSG00000079164.4/protein_coding	252.615	-0.242717	0.0857808	-2.8295	0.00466211	0.0429205	Tlr5
Wasf2/ENSMUSG00000028868.9/protein_coding	2807.14	0.249501	0.0881735	2.82966	0.00465973	0.0429205	Wasf2
Mbd3/ENSMUSG00000035478.10/protein_coding	690.108	0.174962	0.0618546	2.82859	0.0046753	0.0429932	Mbd3
Pknox2/ENSMUSG00000035934.11/protein_coding	1.09812	-0.135277	0.0478225	-2.82872	0.00467341	0.0429932	Pknox2
Chid1/ENSMUSG00000025512.10/protein_coding	345.295	-0.201031	0.071077	-2.82836	0.00467873	0.0429977	Chid1
Sh3gl1/ENSMUSG00000003200.9/protein_coding	1251.81	-0.145957	0.0516101	-2.82807	0.00468299	0.0429977	Sh3gl1
Snhg1/ENSMUSG00000097188.1/lincRNA	85.7241	0.306343	0.108324	2.82802	0.00468373	0.0429977	Snhg1
Plxna1/ENSMUSG00000030084.7/protein_coding	93.1024	0.303996	0.107531	2.82705	0.00469793	0.0431037	Plxna1
Zfp106/ENSMUSG00000027288.12/protein_coding	769.384	0.157617	0.0557797	2.82571	0.00471762	0.04326	Zfp106
B3galnt1/ENSMUSG00000043300.2/protein_coding	940.631	-0.208244	0.0737245	-2.82462	0.0047337	0.0433585	B3galnt1
Runx3/ENSMUSG00000070691.6/protein_coding	9.71381	-0.297618	0.10536	-2.82479	0.00473121	0.0433585	Runx3
Lmnb2/ENSMUSG00000062075.9/protein_coding	134.817	0.237045	0.0839414	2.82394	0.00474375	0.043426	Lmnb2
E130308A19Rik/ENSMUSG00000045071.9/protein_coding	183.915	0.205646	0.0728632	2.82236	0.00476717	0.0436159	E130308A19Rik
Ly6g6e/ENSMUSG00000013766.7/protein_coding	39.6883	-0.311979	0.110596	-2.82089	0.00478905	0.0437757	Ly6g6e
Sec61b/ENSMUSG00000053317.7/protein_coding	229.126	-0.21207	0.07518	-2.82082	0.00479004	0.0437757	Sec61b
Gm8186/ENSMUSG00000049124.3/protein_coding	31.7697	-0.319494	0.113315	-2.81951	0.0048097	0.0439308	Gm8186
Cic/ENSMUSG00000005442.9/protein_coding	411.888	0.273981	0.0971822	2.81925	0.00481357	0.0439414	Cic
Ms4a4c/ENSMUSG00000024675.15/protein_coding	65.3122	-0.315544	0.112009	-2.81712	0.0048456	0.0441841	Ms4a4c
Psma6/ENSMUSG00000021024.10/protein_coding	928.18	-0.2172	0.0770984	-2.81718	0.00484468	0.0441841	Psma6
Rhbdf1/ENSMUSG00000020282.14/protein_coding	288.622	0.213325	0.0757477	2.81626	0.00485859	0.0442777	Rhbdf1
Slc4a4/ENSMUSG00000060961.10/protein_coding	2.36912	-0.169676	0.0602528	-2.81607	0.00486156	0.0442799	Slc4a4
C1rl/ENSMUSG00000038527.9/protein_coding	183.762	-0.281309	0.0999502	-2.81449	0.00488546	0.044423	C1rl
Cox7b/ENSMUSG00000031231.4/protein_coding	274.685	-0.234528	0.0833227	-2.81469	0.00488243	0.044423	Cox7b
RP24-201C14.12/ENSMUSG00000103940.1/TEC	13.5964	-0.308266	0.109522	-2.81465	0.00488303	0.044423	RP24-201C14.12
Coro7/ENSMUSG00000039637.10/protein_coding	715.035	0.157438	0.0559502	2.81389	0.00489457	0.044481	Coro7
Atl3/ENSMUSG00000024759.9/protein_coding	119.468	0.275584	0.0979761	2.81277	0.00491173	0.0446119	Atl3
Csrnp1/ENSMUSG00000032515.7/protein_coding	152.596	0.24307	0.0864244	2.81252	0.00491556	0.0446217	Csrnp1
Atp5k/ENSMUSG00000050856.12/protein_coding	88.3373	-0.250284	0.0890206	-2.81153	0.00493067	0.0446841	Atp5k
Gm13657/ENSMUSG00000086813.1/processed_transcript	6.81322	-0.279468	0.0993957	-2.81167	0.0049285	0.0446841	Gm13657
Kcnh2/ENSMUSG00000038319.10/protein_coding	1.97601	-0.170733	0.0607229	-2.81167	0.00492851	0.0446841	Kcnh2
Pld1/ENSMUSG00000027695.12/protein_coding	2068.48	0.178002	0.063368	2.80902	0.00496929	0.0449838	Pld1
Zfp783/ENSMUSG00000072653.8/transcribed_unprocessed_pseudogene	180.284	-0.259812	0.0924887	-2.80912	0.00496773	0.0449838	Zfp783
Atox1/ENSMUSG00000018585.9/protein_coding	459.03	-0.213538	0.0760381	-2.80831	0.00498029	0.0450333	Atox1
Mtmr10/ENSMUSG00000030522.10/protein_coding	587.312	-0.159205	0.0566872	-2.80848	0.00497757	0.0450333	Mtmr10
Dock11/ENSMUSG00000031093.10/protein_coding	981.204	0.194182	0.0692077	2.80578	0.00501946	0.0453622	Dock11
Rcn2/ENSMUSG00000032320.7/protein_coding	1032.14	-0.151921	0.054171	-2.80447	0.00503996	0.0455221	Rcn2
Znrf2/ENSMUSG00000058446.10/protein_coding	1648.77	0.111822	0.0399012	2.80246	0.00507145	0.0457811	Znrf2
Hist2h4/ENSMUSG00000091405.2/protein_coding	118.008	-0.299632	0.106927	-2.8022	0.00507554	0.0457926	Hist2h4
2310009B15Rik/ENSMUSG00000079283.2/protein_coding	31.0193	-0.311944	0.111386	-2.80056	0.00510138	0.0460002	2310009B15Rik
Harbi1/ENSMUSG00000027243.8/protein_coding	187.414	-0.212183	0.0757779	-2.80007	0.0051092	0.0460452	Harbi1
Atg101/ENSMUSG00000037204.6/protein_coding	332.262	-0.210146	0.0750668	-2.79946	0.00511886	0.0461066	Atg101
Lrig2/ENSMUSG00000032913.9/protein_coding	682.252	0.160133	0.0572143	2.79882	0.00512896	0.046172	Lrig2
Spcs2/ENSMUSG00000035227.6/protein_coding	2666.99	-0.178585	0.0638261	-2.79799	0.00514215	0.0462395	Spcs2
Trf/ENSMUSG00000032554.11/protein_coding	19115.3	-0.132031	0.0471855	-2.79812	0.00514015	0.0462395	Trf
Cpeb4/ENSMUSG00000020300.10/protein_coding	319.021	0.256384	0.0916474	2.79751	0.00514985	0.0462831	Cpeb4
Klra17/ENSMUSG00000014543.10/protein_coding	2.30205	-0.176643	0.0631472	-2.79732	0.00515281	0.0462841	Klra17
Gpr3/ENSMUSG00000049649.8/protein_coding	1.88756	0.187423	0.0670214	2.79647	0.0051665	0.0463612	Gpr3
Pbrm1/ENSMUSG00000042323.12/protein_coding	1180.84	0.147673	0.0528081	2.7964	0.00516751	0.0463612	Pbrm1
Rps6ka1/ENSMUSG00000003644.13/protein_coding	9023.53	0.130934	0.0468249	2.79625	0.00516995	0.0463612	Rps6ka1
L3mbtl3/ENSMUSG00000039089.10/protein_coding	67.7686	0.305036	0.109219	2.79289	0.00522394	0.0468195	L3mbtl3
Smim7/ENSMUSG00000044600.10/protein_coding	860.38	-0.163779	0.0586572	-2.79215	0.00523597	0.0469015	Smim7
Anapc2/ENSMUSG00000026965.8/protein_coding	1566.86	0.101134	0.0362449	2.79028	0.00526617	0.0471201	Anapc2
Gm26510/ENSMUSG00000097154.2/lincRNA	101.366	-0.2908	0.104213	-2.79044	0.0052637	0.0471201	Gm26510
Aass/ENSMUSG00000029695.9/protein_coding	1.04835	-0.112809	0.0404318	-2.7901	0.00526917	0.0471209	Aass
Lsp1/ENSMUSG00000018819.6/protein_coding	699.358	-0.215334	0.0772604	-2.78711	0.00531796	0.0475311	Lsp1
Gm9581/ENSMUSG00000091562.3/processed_transcript	65.9224	0.287566	0.103199	2.78651	0.00532786	0.0475411	Gm9581
Gtdc1/ENSMUSG00000036890.9/protein_coding	115.021	0.246727	0.0885355	2.78676	0.00532375	0.0475411	Gtdc1
Zfp868/ENSMUSG00000060427.11/protein_coding	276.666	-0.207457	0.0744493	-2.78655	0.00532728	0.0475411	Zfp868
Cox16/ENSMUSG00000091803.3/protein_coding	261.056	-0.188883	0.0677952	-2.78609	0.00533483	0.0475514	Cox16
Hadhb/ENSMUSG00000059447.9/protein_coding	1078.99	-0.167374	0.060075	-2.78609	0.00533486	0.0475514	Hadhb
Ncoa2/ENSMUSG00000005886.10/protein_coding	686.66	0.190371	0.0683531	2.78511	0.00535102	0.0476431	Ncoa2
Vav3/ENSMUSG00000033721.12/protein_coding	22.2399	-0.308458	0.110751	-2.78515	0.00535028	0.0476431	Vav3
Drg1/ENSMUSG00000020457.9/protein_coding	926.946	-0.201137	0.0722582	-2.78359	0.00537615	0.0478332	Drg1
Tmem119/ENSMUSG00000054675.5/protein_coding	53309.7	0.144638	0.0519634	2.78346	0.00537825	0.0478332	Tmem119
Shmt1/ENSMUSG00000020534.10/protein_coding	43.3094	-0.299239	0.107513	-2.78327	0.00538132	0.0478343	Shmt1
Vcp/ENSMUSG00000028452.7/protein_coding	3725.67	0.13441	0.0483003	2.7828	0.00538925	0.0478785	Vcp
Nudt3/ENSMUSG00000024213.9/protein_coding	737.363	0.16807	0.0604207	2.78166	0.00540824	0.048021	Nudt3
Impact/ENSMUSG00000024423.5/protein_coding	531.513	0.180522	0.0649047	2.78134	0.00541356	0.048042	Impact
Arrb1/ENSMUSG00000018909.11/protein_coding	995.071	0.203739	0.0732674	2.78075	0.00542329	0.0481021	Arrb1
Entpd4/ENSMUSG00000095463.4/protein_coding	372.51	-0.186543	0.0670891	-2.78053	0.00542702	0.048109	Entpd4
Acss2/ENSMUSG00000027605.14/protein_coding	68.6837	-0.293628	0.105621	-2.78	0.00543585	0.048161	Acss2
Emc7/ENSMUSG00000055943.5/protein_coding	946.854	-0.154325	0.0555189	-2.77968	0.00544123	0.0481823	Emc7
Spast/ENSMUSG00000024068.6/protein_coding	519.155	0.158319	0.0569621	2.77937	0.00544641	0.0482019	Spast
Med10/ENSMUSG00000021598.8/protein_coding	240.836	-0.20215	0.0727585	-2.77837	0.00546332	0.0483253	Med10
Ccdc107/ENSMUSG00000028461.8/protein_coding	352.731	-0.252766	0.0910568	-2.77592	0.00550465	0.0486643	Ccdc107
Trappc2l/ENSMUSG00000015013.8/protein_coding	247.045	-0.209052	0.0753284	-2.77521	0.00551668	0.0487442	Trappc2l
Parp1/ENSMUSG00000026496.7/protein_coding	1095.03	0.125419	0.0452117	2.77403	0.00553661	0.0488937	Parp1
RP23-346I1.4/ENSMUSG00000103284.1/TEC	41.8272	0.311808	0.112445	2.77298	0.00555453	0.0490253	RP23-346I1.4
Zeb2os/ENSMUSG00000052248.11/antisense	223.508	-0.242711	0.0875367	-2.77267	0.00555978	0.049045	Zeb2os
Hexim1/ENSMUSG00000048878.6/protein_coding	50.8425	0.292206	0.105399	2.77238	0.00556483	0.0490629	Hexim1
Dhrs7/ENSMUSG00000021094.9/protein_coding	610.612	-0.156138	0.056326	-2.77204	0.00557055	0.0490867	Dhrs7
Lphn1/ENSMUSG00000013033.12/protein_coding	41.709	0.312159	0.112653	2.77097	0.00558901	0.0492227	Lphn1
Nudt14/ENSMUSG00000002804.3/protein_coding	119.84	-0.25359	0.0915784	-2.76911	0.00562102	0.0494778	Nudt14
Cdk5rap3/ENSMUSG00000018669.10/protein_coding	808.059	-0.175201	0.063276	-2.76883	0.00562576	0.0494926	Cdk5rap3
Zfp709/ENSMUSG00000056019.8/protein_coding	286.99	-0.22695	0.0820036	-2.76757	0.00564762	0.0496581	Zfp709
Ubap2l/ENSMUSG00000042520.12/protein_coding	1735.62	0.124929	0.0451559	2.76661	0.0056643	0.0497778	Ubap2l
Sft2d1/ENSMUSG00000073468.7/protein_coding	3586.4	-0.190245	0.0687932	-2.76546	0.00568425	0.0498992	Sft2d1
Tns4/ENSMUSG00000017607.5/protein_coding	127.376	0.258294	0.0933947	2.76562	0.00568148	0.0498992	Tns4
Cytip/ENSMUSG00000026832.8/protein_coding	96.6887	-0.301003	0.108935	-2.76315	0.00572472	0.0502205	Cytip
Fam109b/ENSMUSG00000049687.5/protein_coding	10.2384	-0.275675	0.0997798	-2.76284	0.00573012	0.0502205	Fam109b
Higd1a/ENSMUSG00000038412.7/protein_coding	228.439	-0.192561	0.0696932	-2.76298	0.00572766	0.0502205	Higd1a
Sfswap/ENSMUSG00000029439.10/protein_coding	232.563	0.222941	0.0807068	2.76236	0.00573857	0.0502674	Sfswap
Ythdf1/ENSMUSG00000038848.10/protein_coding	810.939	0.165903	0.0600658	2.76203	0.00574437	0.0502911	Ythdf1
Snx12/ENSMUSG00000046032.12/protein_coding	341.051	0.18323	0.0663447	2.76178	0.00574864	0.0503013	Snx12
Akap10/ENSMUSG00000047804.11/protein_coding	585.456	-0.17346	0.0628271	-2.76091	0.00576408	0.0503822	Akap10
Slc38a1/ENSMUSG00000023169.10/protein_coding	1025.26	0.186332	0.0674875	2.76099	0.00576261	0.0503822	Slc38a1
Naip5/ENSMUSG00000071203.6/protein_coding	846.879	0.19187	0.0695089	2.76036	0.00577373	0.0504394	Naip5
Gde1/ENSMUSG00000033917.10/protein_coding	678.254	0.145631	0.0527655	2.75996	0.00578085	0.0504745	Gde1
Dpp4/ENSMUSG00000035000.8/protein_coding	14.7162	-0.274464	0.0994661	-2.75937	0.00579128	0.0505185	Dpp4
Fbxl18/ENSMUSG00000066640.7/protein_coding	210.713	0.219051	0.0793856	2.75932	0.00579211	0.0505185	Fbxl18
Dpy19l3/ENSMUSG00000043671.10/protein_coding	234.466	-0.237118	0.0859503	-2.75878	0.00580175	0.0505503	Dpy19l3
Ezh1/ENSMUSG00000006920.10/protein_coding	970.407	0.125296	0.0454203	2.75859	0.00580508	0.0505503	Ezh1
Trit1/ENSMUSG00000028653.12/protein_coding	385.658	0.16132	0.0584786	2.75862	0.00580463	0.0505503	Trit1
Agpat5/ENSMUSG00000031467.6/protein_coding	347.158	-0.208516	0.0756055	-2.75795	0.0058166	0.0506234	Agpat5
Pdcd6ip/ENSMUSG00000032504.11/protein_coding	1629.78	0.141303	0.0512535	2.75694	0.00583442	0.0507242	Pdcd6ip
Sf1/ENSMUSG00000024949.13/protein_coding	1413.53	0.203694	0.0738807	2.75707	0.00583218	0.0507242	Sf1
Pygo2/ENSMUSG00000047824.9/protein_coding	829.891	0.158646	0.0575567	2.75635	0.00584504	0.0507893	Pygo2
Gm15157/ENSMUSG00000082560.1/processed_pseudogene	6.76351	-0.277616	0.100739	-2.75581	0.00585478	0.0508468	Gm15157
Akap5/ENSMUSG00000021057.11/protein_coding	49.2658	-0.290993	0.10565	-2.75431	0.00588158	0.051025	Akap5
Bcl2l2/ENSMUSG00000089682.5/protein_coding	8.52802	0.269134	0.0977082	2.75447	0.0058788	0.051025	Bcl2l2
Triqk/ENSMUSG00000055963.8/protein_coding	13.7892	-0.290178	0.105377	-2.75373	0.00589212	0.0510891	Triqk
Man1a2/ENSMUSG00000008763.12/protein_coding	2175.03	0.144187	0.0523649	2.75351	0.00589606	0.0510961	Man1a2
Lancl1/ENSMUSG00000026000.12/protein_coding	426.625	-0.168107	0.0610587	-2.75319	0.00590169	0.0511176	Lancl1
Mbnl3/ENSMUSG00000036109.13/protein_coding	1.55537	-0.138356	0.0502868	-2.75135	0.0059351	0.0513796	Mbnl3
Fignl1/ENSMUSG00000035455.8/protein_coding	31.9512	0.308383	0.112102	2.75092	0.00594285	0.0513919	Fignl1
Thsd1/ENSMUSG00000031480.11/protein_coding	88.0614	0.292806	0.106435	2.75104	0.00594065	0.0513919	Thsd1
Cd59a/ENSMUSG00000032679.8/protein_coding	9.49529	-0.261316	0.0950304	-2.74982	0.00596286	0.0515375	Cd59a
Carkd/ENSMUSG00000031505.6/protein_coding	511.869	-0.176041	0.064034	-2.74917	0.00597458	0.0515839	Carkd
Dnajb14/ENSMUSG00000074212.3/protein_coding	569.94	0.19266	0.0700756	2.74931	0.005972	0.0515839	Dnajb14
Nfyc/ENSMUSG00000032897.13/protein_coding	412.733	0.158157	0.0575571	2.74783	0.00599903	0.0517675	Nfyc
Slc1a1/ENSMUSG00000024935.6/protein_coding	1.10655	-0.138528	0.0504208	-2.74745	0.00600611	0.0517736	Slc1a1
Tma7/ENSMUSG00000091537.2/protein_coding	369.663	-0.222217	0.0808806	-2.74747	0.00600577	0.0517736	Tma7
Rab35/ENSMUSG00000029518.11/protein_coding	344.693	0.247056	0.0899303	2.74719	0.00601079	0.0517865	Rab35
Limk1/ENSMUSG00000029674.9/protein_coding	562.179	0.189406	0.0689527	2.74689	0.00601633	0.0518068	Limk1
Atp2a3/ENSMUSG00000020788.11/protein_coding	148.897	-0.284769	0.103683	-2.74652	0.00602303	0.051837	Atp2a3
Hnrnpa0/ENSMUSG00000007836.6/protein_coding	112.644	0.273177	0.0994812	2.74602	0.00603239	0.05189	Hnrnpa0
Ahsa2/ENSMUSG00000020288.9/protein_coding	263.684	0.269497	0.0982048	2.74423	0.00606524	0.0520349	Ahsa2
Bclaf1/ENSMUSG00000037608.11/protein_coding	1080.96	0.181226	0.0660382	2.74427	0.00606462	0.0520349	Bclaf1
Smarcd3/ENSMUSG00000028949.9/protein_coding	40.7661	0.310439	0.113106	2.74468	0.00605694	0.0520349	Smarcd3
Supt6/ENSMUSG00000002052.6/protein_coding	370.176	0.244446	0.0890675	2.7445	0.00606031	0.0520349	Supt6
Tpd52l2/ENSMUSG00000000827.14/protein_coding	782.353	-0.155286	0.0565845	-2.74432	0.00606364	0.0520349	Tpd52l2
Saal1/ENSMUSG00000006763.8/protein_coding	168.97	-0.234038	0.0852968	-2.74381	0.00607314	0.0520731	Saal1
Trib1/ENSMUSG00000032501.8/protein_coding	782.281	0.257859	0.0939841	2.74365	0.0060761	0.0520731	Trib1
Idi1/ENSMUSG00000058258.10/protein_coding	99.1048	-0.271587	0.0990131	-2.74294	0.0060891	0.0521228	Idi1
Jkamp/ENSMUSG00000005078.12/protein_coding	541.122	-0.159834	0.0582737	-2.74281	0.00609152	0.0521228	Jkamp
Kdm3b/ENSMUSG00000038773.10/protein_coding	856.461	0.185402	0.0675934	2.7429	0.00608983	0.0521228	Kdm3b
Tcte3/ENSMUSG00000079707.5/protein_coding	2.00449	0.157487	0.0574524	2.74117	0.00612199	0.0523441	Tcte3
Tmem126b/ENSMUSG00000030614.7/protein_coding	178.585	-0.193431	0.0705675	-2.74108	0.00612383	0.0523441	Tmem126b
Srp68/ENSMUSG00000020780.11/protein_coding	740.488	0.137453	0.0501591	2.74034	0.00613756	0.0524339	Srp68
Chmp2a/ENSMUSG00000033916.4/protein_coding	518.851	-0.195181	0.0712328	-2.74004	0.00614311	0.0524537	Chmp2a
Vezf1/ENSMUSG00000018377.6/protein_coding	548.206	0.149756	0.0546671	2.73942	0.00615474	0.0525254	Vezf1
Foxj1/ENSMUSG00000034227.7/protein_coding	1.27466	-0.131263	0.0479205	-2.73918	0.00615935	0.0525372	Foxj1
Nedd4l/ENSMUSG00000024589.11/protein_coding	242.213	0.20994	0.0766757	2.73803	0.00618089	0.0526473	Nedd4l
Pet100/ENSMUSG00000087687.2/protein_coding	100.876	-0.2824	0.103142	-2.73797	0.00618198	0.0526473	Pet100
Rnf43/ENSMUSG00000034177.11/protein_coding	1.30599	-0.115226	0.0420812	-2.73819	0.00617784	0.0526473	Rnf43
Pebp1/ENSMUSG00000032959.8/protein_coding	607.188	-0.149599	0.0546468	-2.73755	0.00618983	0.0526865	Pebp1
Zfp703/ENSMUSG00000085795.3/protein_coding	301.817	0.268145	0.0979635	2.73719	0.00619662	0.0527167	Zfp703
Ngfrap1/ENSMUSG00000046432.8/protein_coding	44.628	-0.291128	0.106381	-2.73666	0.0062067	0.0527512	Ngfrap1
Nt5dc1/ENSMUSG00000039480.9/protein_coding	267.5	-0.215794	0.078859	-2.73646	0.00621042	0.0527512	Nt5dc1
Zfp710/ENSMUSG00000048897.11/protein_coding	2371.26	0.200848	0.0733964	2.73648	0.00620996	0.0527512	Zfp710
Dhx36/ENSMUSG00000027770.5/protein_coding	612.917	-0.295085	0.107861	-2.73579	0.00622301	0.0528306	Dhx36
Bahd1/ENSMUSG00000040007.8/protein_coding	253.873	0.233184	0.0852743	2.73452	0.00624713	0.0530077	Bahd1
Pigp/ENSMUSG00000022940.12/protein_coding	269.669	-0.221091	0.0809029	-2.73279	0.00628	0.0532588	Pigp
Apoe/ENSMUSG00000002985.11/protein_coding	8963.12	-0.224354	0.082113	-2.73226	0.00629015	0.053295	Apoe
Rexo4/ENSMUSG00000052406.10/protein_coding	519.772	0.163322	0.0597764	2.73222	0.00629084	0.053295	Rexo4
Ifi27l2a/ENSMUSG00000079017.3/protein_coding	105.563	-0.307515	0.112586	-2.73136	0.00630728	0.0534053	Ifi27l2a
Srf/ENSMUSG00000015605.5/protein_coding	124.958	0.241377	0.0883777	2.7312	0.00631043	0.0534053	Srf
Parp14/ENSMUSG00000034422.10/protein_coding	508.409	0.267154	0.0978321	2.73074	0.00631931	0.0534526	Parp14
Trp73/ENSMUSG00000029026.12/protein_coding	0.872402	-0.098466	0.0360659	-2.73017	0.00633012	0.0535162	Trp73
Atp6v0e/ENSMUSG00000015575.10/protein_coding	1039.54	-0.153122	0.056096	-2.72964	0.00634032	0.0535467	Atp6v0e
Mmp2/ENSMUSG00000031740.7/protein_coding	483.856	0.210933	0.077273	2.72972	0.00633889	0.0535467	Mmp2
B230208H11Rik/ENSMUSG00000097378.3/lincRNA	4.79872	-0.228687	0.0838598	-2.72701	0.00639106	0.0538912	B230208H11Rik
Psmb9/ENSMUSG00000096727.1/protein_coding	510.099	-0.175563	0.0643754	-2.72718	0.00638783	0.0538912	Psmb9
Zfp36l2/ENSMUSG00000045817.8/protein_coding	4402.21	0.194206	0.0712077	2.72732	0.00638517	0.0538912	Zfp36l2
Mfsd8/ENSMUSG00000025759.8/protein_coding	273.52	-0.194478	0.0713313	-2.72641	0.00640274	0.0539616	Mfsd8
B230325K18Rik/ENSMUSG00000063254.2/protein_coding	29.4557	0.308869	0.113342	2.7251	0.00642824	0.0541312	B230325K18Rik
Diap1/ENSMUSG00000024456.12/protein_coding	64.4913	0.288369	0.105829	2.72486	0.00643285	0.0541312	Diap1
Fam46c/ENSMUSG00000044468.10/protein_coding	1966.13	0.204047	0.0748796	2.72501	0.00643002	0.0541312	Fam46c
Champ1/ENSMUSG00000047710.7/protein_coding	666.067	0.153667	0.0564017	2.72451	0.00643968	0.0541606	Champ1
Mpv17l2/ENSMUSG00000035559.8/protein_coding	212.888	-0.203832	0.074834	-2.72379	0.00645373	0.0542395	Mpv17l2
Rsbn1l/ENSMUSG00000039968.5/protein_coding	197.342	0.222935	0.0818504	2.72369	0.00645573	0.0542395	Rsbn1l
Lcp2/ENSMUSG00000002699.8/protein_coding	2943.23	0.114209	0.0419404	2.72313	0.00646673	0.0543038	Lcp2
Amn1/ENSMUSG00000068250.9/protein_coding	120.225	-0.217178	0.0797956	-2.72168	0.00649509	0.054488	Amn1
Dtx4/ENSMUSG00000039982.7/protein_coding	4729.59	0.143099	0.0525844	2.72133	0.00650207	0.054488	Dtx4
Hint2/ENSMUSG00000028470.6/protein_coding	147.968	-0.232512	0.0854329	-2.72157	0.00649729	0.054488	Hint2
Rnf31/ENSMUSG00000047098.13/protein_coding	468.479	0.181167	0.0665703	2.72144	0.00649979	0.054488	Rnf31
Kdm5c/ENSMUSG00000025332.10/protein_coding	842.996	0.176422	0.0648362	2.72105	0.00650758	0.054506	Kdm5c
Tonsl/ENSMUSG00000059323.9/protein_coding	966.39	-0.150017	0.0551364	-2.72083	0.00651178	0.0545131	Tonsl
Rps6kb1/ENSMUSG00000020516.11/protein_coding	400.52	0.159711	0.0587043	2.72061	0.00651623	0.0545223	Rps6kb1
Gimap4/ENSMUSG00000054435.12/protein_coding	4.93535	-0.19201	0.0705806	-2.72043	0.00651962	0.0545225	Gimap4
Pkd2/ENSMUSG00000034462.9/protein_coding	414.879	0.17406	0.0639935	2.71996	0.00652903	0.054559	Pkd2
Prkar2a/ENSMUSG00000032601.9/protein_coding	423.035	0.181917	0.0668844	2.71987	0.0065307	0.054559	Prkar2a
Traf3/ENSMUSG00000021277.12/protein_coding	348.039	0.247383	0.0909746	2.71925	0.006543	0.0546337	Traf3
Adnp/ENSMUSG00000051149.11/protein_coding	292.538	0.270741	0.0995923	2.71849	0.00655808	0.0547034	Adnp
Rest/ENSMUSG00000029249.11/protein_coding	452.048	0.170088	0.0625635	2.71865	0.00655486	0.0547034	Rest
Plekhg1/ENSMUSG00000040624.13/protein_coding	5.55126	-0.238572	0.0877734	-2.71804	0.00656691	0.0547489	Plekhg1
RP24-444I15.1/ENSMUSG00000103303.1/TEC	12.2593	0.283743	0.104408	2.71765	0.00657483	0.0547869	RP24-444I15.1
Sos1/ENSMUSG00000024241.6/protein_coding	297.076	0.216791	0.0798083	2.7164	0.00659964	0.0549654	Sos1
A230056P14Rik/ENSMUSG00000087178.3/processed_transcript	73.9058	-0.284035	0.104576	-2.71607	0.0066062	0.0549919	A230056P14Rik
Zfp763/ENSMUSG00000067430.7/protein_coding	143.149	-0.221796	0.081666	-2.7159	0.00660967	0.0549926	Zfp763
Myo5b/ENSMUSG00000025885.14/protein_coding	1.25661	-0.118677	0.0437095	-2.71512	0.00662513	0.0550648	Myo5b
Upp1/ENSMUSG00000020407.9/protein_coding	1.10451	-0.117859	0.0434056	-2.71529	0.00662182	0.0550648	Upp1
Cgrrf1/ENSMUSG00000055128.10/protein_coding	475.087	-0.162604	0.0599057	-2.71433	0.00664093	0.0551679	Cgrrf1
Phip/ENSMUSG00000032253.9/protein_coding	944.815	0.201281	0.0741647	2.71397	0.00664817	0.0551999	Phip
Dynlt1f/ENSMUSG00000095677.1/protein_coding	300.784	-0.227693	0.0839129	-2.71345	0.00665871	0.0552591	Dynlt1f
Arf6/ENSMUSG00000044147.7/protein_coding	1061.89	0.136378	0.0502869	2.712	0.00668793	0.0554733	Arf6
Mrps16/ENSMUSG00000049960.3/protein_coding	114.771	-0.268644	0.0990854	-2.71124	0.00670331	0.0555441	Mrps16
Srcap/ENSMUSG00000053877.8/protein_coding	642.749	0.235043	0.0866876	2.71138	0.00670041	0.0555441	Srcap
Il4i1/ENSMUSG00000074141.8/protein_coding	182.866	-0.21163	0.0780721	-2.71071	0.006714	0.0556043	Il4i1
Dennd5a/ENSMUSG00000035901.10/protein_coding	1483.65	0.133017	0.0490786	2.71028	0.00672256	0.0556469	Dennd5a
4933434E20Rik/ENSMUSG00000027942.12/protein_coding	1095.85	-0.150219	0.0554441	-2.70939	0.00674078	0.0557409	4933434E20Rik
Madd/ENSMUSG00000040687.12/protein_coding	1059.27	0.180323	0.0665522	2.70949	0.00673862	0.0557409	Madd
Pak1/ENSMUSG00000030774.9/protein_coding	956.311	0.162878	0.0601313	2.70871	0.00675455	0.0558264	Pak1
Rpl35/ENSMUSG00000062997.6/protein_coding	231.487	-0.240987	0.0889748	-2.70849	0.00675909	0.0558355	Rpl35
Myof/ENSMUSG00000048612.11/protein_coding	13.3031	-0.289061	0.106735	-2.7082	0.00676487	0.0558549	Myof
Ssbp2/ENSMUSG00000003992.10/protein_coding	581.764	0.232025	0.0856863	2.70785	0.00677215	0.0558866	Ssbp2
Cabin1/ENSMUSG00000020196.9/protein_coding	1053.61	0.147981	0.054657	2.70745	0.00678016	0.0558982	Cabin1
Elavl4/ENSMUSG00000028546.13/protein_coding	70.126	-0.269848	0.0996691	-2.70744	0.00678044	0.0558982	Elavl4
Intu/ENSMUSG00000060798.4/protein_coding	53.489	-0.291709	0.107754	-2.70716	0.00678608	0.0559115	Intu
Mlx/ENSMUSG00000017801.11/protein_coding	335.151	-0.213202	0.078759	-2.70702	0.00678893	0.0559115	Mlx
Ppargc1a/ENSMUSG00000029167.9/protein_coding	1.2863	-0.119304	0.0440934	-2.70572	0.00681559	0.0561026	Ppargc1a
Rfx1/ENSMUSG00000031706.6/protein_coding	149.266	0.244334	0.0903225	2.70512	0.0068279	0.0561755	Rfx1
Dnajc10/ENSMUSG00000027006.9/protein_coding	588.958	-0.154522	0.0571319	-2.70465	0.00683771	0.056186	Dnajc10
Epc1/ENSMUSG00000024240.9/protein_coding	325.687	0.276602	0.102261	2.70487	0.00683311	0.056186	Epc1
Pphln1/ENSMUSG00000036167.11/protein_coding	476.55	0.189251	0.0699793	2.70439	0.00684301	0.056186	Pphln1
Tmc8/ENSMUSG00000050106.13/protein_coding	73.1752	-0.279857	0.103481	-2.70443	0.00684223	0.056186	Tmc8
Oas1g/ENSMUSG00000066861.10/protein_coding	15.4437	-0.292908	0.108375	-2.70274	0.00687713	0.0564376	Oas1g
Dbnl/ENSMUSG00000020476.10/protein_coding	1838.21	0.0938044	0.0347099	2.70252	0.00688156	0.0564455	Dbnl
Kcnq1ot1/ENSMUSG00000101609.1/antisense	399.009	0.263074	0.097375	2.70166	0.00689941	0.0565633	Kcnq1ot1
Tmed1/ENSMUSG00000032180.10/protein_coding	272.331	-0.225735	0.0835867	-2.70061	0.00692129	0.0567141	Tmed1
Psmb6/ENSMUSG00000018286.6/protein_coding	978.63	-0.159892	0.0592137	-2.70024	0.00692886	0.0567475	Psmb6
Mgrn1/ENSMUSG00000022517.12/protein_coding	1890.22	0.136247	0.0504649	2.69984	0.00693725	0.0567876	Mgrn1
Fchsd1/ENSMUSG00000038524.9/protein_coding	180.075	0.188142	0.0697293	2.69817	0.00697209	0.057044	Fchsd1
H1f0/ENSMUSG00000096210.1/protein_coding	673.92	-0.19743	0.0731891	-2.69753	0.00698555	0.0571122	H1f0
Zfp93/ENSMUSG00000055305.11/protein_coding	55.2222	-0.286967	0.106385	-2.69744	0.00698745	0.0571122	Zfp93
Epas1/ENSMUSG00000024140.9/protein_coding	3.64741	-0.215616	0.0799536	-2.69677	0.00700163	0.0571993	Epas1
Fgfr2/ENSMUSG00000030849.13/protein_coding	2.97925	-0.189745	0.0703658	-2.69655	0.00700617	0.0572076	Fgfr2
Set/ENSMUSG00000054766.9/protein_coding	1084.79	0.151517	0.0562269	2.69475	0.00704421	0.0574894	Set
Apc/ENSMUSG00000005871.10/protein_coding	928.05	0.211103	0.0783702	2.69367	0.00706704	0.0576468	Apc
Jun/ENSMUSG00000052684.4/protein_coding	9011.5	0.278256	0.103319	2.69317	0.00707755	0.0577035	Jun
Bach1/ENSMUSG00000025612.5/protein_coding	495.835	0.23361	0.0867503	2.6929	0.00708342	0.0577224	Bach1
Zdhhc7/ENSMUSG00000031823.9/protein_coding	813.139	0.155342	0.057702	2.69214	0.00709944	0.057824	Zdhhc7
Cd48/ENSMUSG00000015355.9/protein_coding	1224.74	-0.22482	0.0835224	-2.69173	0.00710826	0.0578668	Cd48
Klf11/ENSMUSG00000020653.7/protein_coding	61.5938	-0.278305	0.103399	-2.69156	0.0071119	0.0578674	Klf11
Mttp/ENSMUSG00000028158.10/protein_coding	112.124	-0.281935	0.104773	-2.69091	0.00712576	0.0579512	Mttp
Dst/ENSMUSG00000026131.13/protein_coding	2134.81	0.215698	0.0801676	2.69059	0.00713253	0.0579772	Dst
[truncated: 41,439 more rows]

## Sheet: Filtered, >30% change
GeneID	baseMean	log2FoldChange	lfcSE	stat	pvalue	padj	symbol	FC
Cx3cr1/ENSMUSG00000052336.6/protein_coding	42591.7	-6.05571	0.049436	-122.496	0	0	Cx3cr1	0.0150331
F630028O10Rik/ENSMUSG00000078122.4/antisense	33.7659	-1.01563	0.113217	-8.97067	2.94705e-19	5.98583e-16	F630028O10Rik	0.494612
F5/ENSMUSG00000026579.8/protein_coding	16.2235	-1.00337	0.103299	-9.71319	2.6492e-22	1.07617e-18	F5	0.498835
Clu/ENSMUSG00000022037.10/protein_coding	43.5846	-0.967313	0.108558	-8.91054	5.07864e-19	9.16921e-16	Clu	0.511458
1500015O10Rik/ENSMUSG00000026051.8/protein_coding	12.9379	-0.900138	0.0988966	-9.10181	8.88378e-20	2.06218e-16	1500015O10Rik	0.535836
Ccr5/ENSMUSG00000079227.5/protein_coding	4156.13	-0.89855	0.11323	-7.9356	2.09483e-15	2.00229e-12	Ccr5	0.536426
Mcemp1/ENSMUSG00000013974.2/protein_coding	35.2126	-0.843476	0.105677	-7.98165	1.44389e-15	1.46636e-12	Mcemp1	0.557299
Strip2/ENSMUSG00000039629.10/protein_coding	9.94922	-0.839879	0.0997588	-8.41909	3.79412e-17	5.60461e-14	Strip2	0.55869
Adam8/ENSMUSG00000025473.12/protein_coding	44.5875	-0.828883	0.107201	-7.73206	1.05822e-14	8.18808e-12	Adam8	0.562965
Angptl7/ENSMUSG00000028989.3/protein_coding	170.071	-0.808883	0.0850033	-9.5159	1.80142e-21	5.85424e-18	Angptl7	0.570824
Clec12a/ENSMUSG00000053063.7/protein_coding	69.4442	-0.808033	0.113311	-7.1311	9.9571e-13	4.75862e-10	Clec12a	0.57116
Mgl2/ENSMUSG00000040950.9/protein_coding	89.8024	-0.788732	0.113063	-6.97602	3.03652e-12	1.09645e-09	Mgl2	0.578852
Ttr/ENSMUSG00000061808.3/protein_coding	467.599	-0.776905	0.0936489	-8.29593	1.07737e-16	1.45884e-13	Ttr	0.583617
Nedd4/ENSMUSG00000032216.10/protein_coding	14.9178	-0.762706	0.110827	-6.88193	5.90491e-12	1.95814e-09	Nedd4	0.58939
Gp49a/ENSMUSG00000089672.4/protein_coding	42.6171	-0.751317	0.1132	-6.63708	3.19968e-11	9.80972e-09	Gp49a	0.594061
Enpp2/ENSMUSG00000022425.11/protein_coding	619.418	-0.748249	0.0932169	-8.02697	9.99101e-16	1.08229e-12	Enpp2	0.595325
Lgals1/ENSMUSG00000068220.5/protein_coding	35.2267	-0.736486	0.112173	-6.56562	5.18153e-11	1.4771e-08	Lgals1	0.600199
Cfp/ENSMUSG00000001128.7/protein_coding	64.5796	-0.731671	0.113327	-6.45628	1.07311e-10	2.85852e-08	Cfp	0.602206
Il18rap/ENSMUSG00000026068.7/protein_coding	18.0676	-0.727363	0.107136	-6.78917	1.12779e-11	3.66509e-09	Il18rap	0.604007
Ppp1r1b/ENSMUSG00000061718.8/protein_coding	20.3912	-0.724498	0.100438	-7.21336	5.45894e-13	3.01948e-10	Ppp1r1b	0.605207
Plp2/ENSMUSG00000031146.6/protein_coding	22.0676	-0.720006	0.102426	-7.02953	2.07234e-12	8.31716e-10	Plp2	0.607095
S100a11/ENSMUSG00000027907.4/protein_coding	81.621	-0.712032	0.0972861	-7.31895	2.49922e-13	1.56192e-10	S100a11	0.61046
Lilra5/ENSMUSG00000070873.5/protein_coding	241.419	-0.70456	0.0875489	-8.04762	8.44226e-16	9.79845e-13	Lilra5	0.61363
Sema4a/ENSMUSG00000028064.13/protein_coding	158.711	-0.701026	0.0999935	-7.01071	2.37111e-12	8.96004e-10	Sema4a	0.615135
Lbp/ENSMUSG00000016024.5/protein_coding	8.19796	-0.697681	0.0890178	-7.83755	4.59433e-15	3.92912e-12	Lbp	0.616562
Gm13889/ENSMUSG00000087006.3/protein_coding	59.3836	-0.697276	0.105454	-6.61213	3.78817e-11	1.11916e-08	Gm13889	0.616736
Sulf1/ENSMUSG00000016918.11/protein_coding	8.18673	-0.697059	0.0925729	-7.52984	5.08024e-14	3.43954e-11	Sulf1	0.616828
Gpm6a/ENSMUSG00000031517.7/protein_coding	12.9197	-0.696941	0.10438	-6.67696	2.43954e-11	7.6231e-09	Gpm6a	0.616879
Chil1/ENSMUSG00000064246.6/protein_coding	45.3192	-0.692888	0.0990713	-6.99383	2.67485e-12	9.8781e-10	Chil1	0.618614
Wfdc17/ENSMUSG00000069792.5/protein_coding	44.1957	-0.692732	0.113218	-6.11858	9.44116e-10	1.88087e-07	Wfdc17	0.618681
Ltb4r1/ENSMUSG00000046908.5/protein_coding	21.1249	-0.680925	0.107506	-6.33385	2.39125e-10	6.0626e-08	Ltb4r1	0.623765
Emb/ENSMUSG00000021728.7/protein_coding	57.561	-0.680804	0.110079	-6.1847	6.22187e-10	1.36621e-07	Emb	0.623818
Ntrk2/ENSMUSG00000055254.10/protein_coding	7.70534	-0.677881	0.0964032	-7.03172	2.03996e-12	8.31716e-10	Ntrk2	0.625083
Ccr1/ENSMUSG00000025804.4/protein_coding	299.57	-0.665898	0.113015	-5.89214	3.81221e-09	6.13313e-07	Ccr1	0.630296
Kcnj13/ENSMUSG00000079436.3/protein_coding	16.0499	-0.663758	0.0925598	-7.17112	7.43876e-13	3.77726e-10	Kcnj13	0.631232
Car2/ENSMUSG00000027562.8/protein_coding	16.5107	-0.663445	0.104391	-6.35537	2.07928e-10	5.36289e-08	Car2	0.631369
Pygl/ENSMUSG00000021069.12/protein_coding	201.766	-0.65391	0.102156	-6.4011	1.54262e-10	4.04292e-08	Pygl	0.635555
Ptgds/ENSMUSG00000015090.9/protein_coding	15.9637	-0.653766	0.105181	-6.21563	5.11193e-10	1.16596e-07	Ptgds	0.635619
Slc39a12/ENSMUSG00000036949.12/protein_coding	158.524	-0.653277	0.0965978	-6.76285	1.35302e-11	4.31084e-09	Slc39a12	0.635835
Vat1l/ENSMUSG00000046844.6/protein_coding	8.65411	-0.651163	0.0925581	-7.03519	1.98992e-12	8.31716e-10	Vat1l	0.636767
Kl/ENSMUSG00000058488.6/protein_coding	34.7277	-0.648069	0.0914047	-7.0901	1.34011e-12	6.04871e-10	Kl	0.638134
Msx1/ENSMUSG00000048450.10/protein_coding	6.22477	-0.642662	0.0902807	-7.11848	1.09124e-12	5.06616e-10	Msx1	0.64053
Ccr3/ENSMUSG00000035448.8/protein_coding	14.8663	-0.640249	0.10338	-6.19316	5.89695e-10	1.3126e-07	Ccr3	0.641602
Gsn/ENSMUSG00000026879.10/protein_coding	123.352	-0.638408	0.110867	-5.75834	8.49431e-09	1.26628e-06	Gsn	0.642421
H2-Aa/ENSMUSG00000036594.10/protein_coding	767.25	-0.635903	0.112853	-5.63478	1.75287e-08	2.31564e-06	H2-Aa	0.643538
H2-Q10/ENSMUSG00000067235.10/protein_coding	18.251	-0.635638	0.104926	-6.05796	1.3786e-09	2.60476e-07	H2-Q10	0.643656
Tmem154/ENSMUSG00000056498.9/protein_coding	68.6891	-0.630183	0.110955	-5.67965	1.3497e-08	1.90263e-06	Tmem154	0.646094
Amica1/ENSMUSG00000048534.6/protein_coding	11.5169	-0.628285	0.0910978	-6.89681	5.31818e-12	1.80031e-09	Amica1	0.646945
H2-Ab1/ENSMUSG00000073421.5/protein_coding	1603.75	-0.627365	0.11332	-5.53625	3.09023e-08	3.76844e-06	H2-Ab1	0.647358
Atp1b1/ENSMUSG00000026576.8/protein_coding	12.6399	-0.623573	0.101801	-6.12543	9.04373e-10	1.86015e-07	Atp1b1	0.649061
Lgals3/ENSMUSG00000050335.12/protein_coding	123.754	-0.614224	0.112453	-5.46207	4.7061e-08	5.31038e-06	Lgals3	0.653281
Lilra6/ENSMUSG00000030427.13/protein_coding	16.2142	-0.610071	0.0919976	-6.63138	3.32573e-11	1.00074e-08	Lilra6	0.655165
S100a6/ENSMUSG00000001025.4/protein_coding	48.054	-0.610005	0.0964149	-6.32688	2.50169e-10	6.15909e-08	S100a6	0.655194
Abat/ENSMUSG00000057880.8/protein_coding	11.5858	-0.60781	0.102585	-5.92496	3.12381e-09	5.28737e-07	Abat	0.656192
Clec10a/ENSMUSG00000000318.12/protein_coding	45.6366	-0.604654	0.112054	-5.39608	6.81126e-08	7.23374e-06	Clec10a	0.657629
Cpne2/ENSMUSG00000034361.5/protein_coding	22.8917	-0.603796	0.112819	-5.35189	8.70394e-08	8.89499e-06	Cpne2	0.65802
2900026A02Rik/ENSMUSG00000051339.8/protein_coding	96.5415	-0.594325	0.108417	-5.48184	4.20928e-08	4.85082e-06	2900026A02Rik	0.662354
Col9a3/ENSMUSG00000027570.11/protein_coding	15.3373	-0.590004	0.111697	-5.28216	1.27671e-07	1.21317e-05	Col9a3	0.664341
Sell/ENSMUSG00000026581.10/protein_coding	71.4824	-0.588552	0.0849379	-6.9292	4.23227e-12	1.46319e-09	Sell	0.66501
Lyz2/ENSMUSG00000069516.7/protein_coding	8687.21	-0.587865	0.112199	-5.23948	1.6103e-07	1.47829e-05	Lyz2	0.665327
H2-Eb1/ENSMUSG00000060586.10/protein_coding	586.883	-0.587819	0.113275	-5.18933	2.11057e-07	1.83394e-05	H2-Eb1	0.665348
Aldoc/ENSMUSG00000017390.11/protein_coding	22.7832	-0.587325	0.106954	-5.49139	3.98787e-08	4.66179e-06	Aldoc	0.665576
Pfkp/ENSMUSG00000021196.9/protein_coding	39.4687	-0.58378	0.113288	-5.15307	2.56263e-07	2.1464e-05	Pfkp	0.667213
Rasgrp4/ENSMUSG00000030589.11/protein_coding	70.4168	-0.582407	0.103464	-5.62906	1.81198e-08	2.35543e-06	Rasgrp4	0.667848
Slamf7/ENSMUSG00000038179.9/protein_coding	21.9004	-0.579944	0.111294	-5.21091	1.8792e-07	1.65952e-05	Slamf7	0.66899
Jam3/ENSMUSG00000031990.10/protein_coding	194.749	-0.579669	0.0881132	-6.57868	4.7463e-11	1.37719e-08	Jam3	0.669117
Crip1/ENSMUSG00000006360.7/protein_coding	55.0506	-0.579632	0.113327	-5.1147	3.14245e-07	2.57887e-05	Crip1	0.669134
Chchd10/ENSMUSG00000049422.6/protein_coding	10.1031	-0.577265	0.0967943	-5.96383	2.46392e-09	4.39959e-07	Chchd10	0.670233
Hist1h4c/ENSMUSG00000060678.4/protein_coding	33.7593	-0.57625	0.11331	-5.0856	3.66466e-07	2.93335e-05	Hist1h4c	0.670705
Car12/ENSMUSG00000032373.10/protein_coding	6.84875	-0.576131	0.0886525	-6.49876	8.0985e-11	2.19321e-08	Car12	0.67076
Rab3d/ENSMUSG00000019066.9/protein_coding	73.1277	-0.574938	0.108273	-5.31007	1.09581e-07	1.06621e-05	Rab3d	0.671315
Ablim1/ENSMUSG00000025085.12/protein_coding	179.97	-0.572636	0.0928028	-6.17046	6.80913e-10	1.4369e-07	Ablim1	0.672387
Dhrs9/ENSMUSG00000027068.6/protein_coding	10.8246	-0.567523	0.0778168	-7.29307	3.02979e-13	1.82337e-10	Dhrs9	0.674774
Prnp/ENSMUSG00000079037.5/protein_coding	37.147	-0.567119	0.107856	-5.25813	1.45525e-07	1.36684e-05	Prnp	0.674963
Sec61g/ENSMUSG00000078974.6/protein_coding	114.285	-0.564993	0.0995469	-5.67564	1.38169e-08	1.90263e-06	Sec61g	0.675959
Tbc1d10c/ENSMUSG00000040247.5/protein_coding	30.6735	-0.563524	0.113233	-4.97669	6.46795e-07	4.77717e-05	Tbc1d10c	0.676647
Chil3/ENSMUSG00000040809.10/protein_coding	293.907	-0.561697	0.0799253	-7.02777	2.09861e-12	8.31716e-10	Chil3	0.677505
Cd209a/ENSMUSG00000031494.6/protein_coding	108.213	-0.559739	0.109205	-5.12559	2.966e-07	2.44642e-05	Cd209a	0.678425
Rn7sk/ENSMUSG00000065037.1/misc_RNA	97.1633	-0.559086	0.107127	-5.21891	1.79975e-07	1.59804e-05	Rn7sk	0.678732
Aoah/ENSMUSG00000021322.7/protein_coding	32.496	-0.558776	0.113187	-4.93677	7.94282e-07	5.69258e-05	Aoah	0.678878
Slc2a3/ENSMUSG00000003153.6/protein_coding	103.162	-0.558696	0.111574	-5.0074	5.51692e-07	4.15021e-05	Slc2a3	0.678916
Fpr1/ENSMUSG00000045551.7/protein_coding	20.2902	-0.558079	0.0957073	-5.8311	5.50643e-09	8.68679e-07	Fpr1	0.679206
Iqgap2/ENSMUSG00000021676.9/protein_coding	26.6617	-0.550362	0.112252	-4.90293	9.44166e-07	6.5563e-05	Iqgap2	0.682849
Slfn1/ENSMUSG00000078763.2/protein_coding	24.5711	-0.549681	0.0971223	-5.65968	1.51652e-08	2.07075e-06	Slfn1	0.683171
Gpr165/ENSMUSG00000031210.6/protein_coding	1796.79	-0.543325	0.0906832	-5.99147	2.07953e-09	3.75448e-07	Gpr165	0.686187
Mndal/ENSMUSG00000090272.3/protein_coding	22.2474	-0.538418	0.113232	-4.75499	1.98459e-06	0.000119879	Mndal	0.688526
Rgs18/ENSMUSG00000026357.3/protein_coding	20.4104	-0.538161	0.109368	-4.92066	8.6252e-07	6.09351e-05	Rgs18	0.688648
Ccr2/ENSMUSG00000049103.9/protein_coding	288.429	-0.537685	0.113306	-4.74544	2.08056e-06	0.000124291	Ccr2	0.688876
Lilrb4/ENSMUSG00000062593.11/protein_coding	131.78	-0.537392	0.100279	-5.35898	8.36945e-08	8.66211e-06	Lilrb4	0.689015
Acsl3/ENSMUSG00000032883.11/protein_coding	67.9916	-0.537113	0.0974787	-5.51005	3.58727e-08	4.28599e-06	Acsl3	0.689149
2610035D17Rik/ENSMUSG00000087259.3/lincRNA	124.615	-0.534683	0.111034	-4.81551	1.46827e-06	9.43001e-05	2610035D17Rik	0.69031
Gapt/ENSMUSG00000046006.5/protein_coding	12.3762	-0.531455	0.0982034	-5.41178	6.24013e-08	6.67078e-06	Gapt	0.691857
Olfm1/ENSMUSG00000026833.14/protein_coding	30.6295	-0.529807	0.11126	-4.76188	1.91801e-06	0.00011629	Olfm1	0.692647
S100a4/ENSMUSG00000001020.7/protein_coding	27.4234	-0.529698	0.11004	-4.81368	1.48178e-06	9.44215e-05	S100a4	0.6927
Spint2/ENSMUSG00000074227.7/protein_coding	8.13605	-0.527842	0.0935424	-5.64281	1.67296e-08	2.24661e-06	Spint2	0.693592
Il2rb/ENSMUSG00000068227.4/protein_coding	11.8446	-0.526257	0.0927046	-5.67671	1.37312e-08	1.90263e-06	Il2rb	0.694354
Atp1a2/ENSMUSG00000007097.10/protein_coding	12.2744	-0.525555	0.107429	-4.89213	9.9749e-07	6.89387e-05	Atp1a2	0.694692
Ms4a7/ENSMUSG00000024672.7/protein_coding	85.9299	-0.522162	0.1125	-4.64143	3.46e-06	0.000188663	Ms4a7	0.696328
Mmp25/ENSMUSG00000023903.7/protein_coding	14.595	-0.517332	0.0985104	-5.25155	1.50825e-07	1.40848e-05	Mmp25	0.698663
Anxa2/ENSMUSG00000032231.10/protein_coding	124.83	-0.514963	0.101497	-5.07368	3.902e-07	3.05519e-05	Anxa2	0.699811
Igfbp4/ENSMUSG00000017493.8/protein_coding	446.031	0.379562	0.0847602	4.47807	7.53208e-06	0.000339027	Igfbp4	1.30095
Bhlhe41/ENSMUSG00000030256.7/protein_coding	1075.92	0.379757	0.0903061	4.20522	2.60832e-05	0.000929442	Bhlhe41	1.30112
Mmp14/ENSMUSG00000000957.8/protein_coding	598.026	0.381962	0.0705469	5.4143	6.15276e-08	6.62094e-06	Mmp14	1.30311
Scube1/ENSMUSG00000016763.10/protein_coding	84.4424	0.384771	0.104796	3.67163	0.000241012	0.00518702	Scube1	1.30565
Phldb1/ENSMUSG00000048537.11/protein_coding	51.7781	0.387352	0.112804	3.43385	0.000595079	0.0101677	Phldb1	1.30799
Ago2/ENSMUSG00000036698.10/protein_coding	366.753	0.389057	0.0854176	4.55477	5.24428e-06	0.000263498	Ago2	1.30954
Pdcd1/ENSMUSG00000026285.7/protein_coding	71.1199	0.391033	0.109248	3.57931	0.000344503	0.00669597	Pdcd1	1.31133
Tnfsf8/ENSMUSG00000028362.2/protein_coding	31.2788	0.39204	0.112504	3.48467	0.00049275	0.00879856	Tnfsf8	1.31225
RP24-541A5.1/ENSMUSG00000103976.1/TEC	18.3216	0.392632	0.107235	3.66141	0.000250827	0.0053557	RP24-541A5.1	1.31279
Npnt/ENSMUSG00000040998.14/protein_coding	999.618	0.394765	0.0828328	4.76581	1.88094e-06	0.0001149	Npnt	1.31473
Ebf3/ENSMUSG00000010476.9/protein_coding	101.966	0.395808	0.101816	3.88747	0.000101296	0.00267202	Ebf3	1.31568
Serpinf1/ENSMUSG00000000753.11/protein_coding	613.085	0.396579	0.078995	5.02031	5.15883e-07	3.89888e-05	Serpinf1	1.31638
Rnf213/ENSMUSG00000070327.9/protein_coding	325.863	0.397072	0.0918617	4.32249	1.54276e-05	0.000604054	Rnf213	1.31683
Hpcal1/ENSMUSG00000071379.1/protein_coding	121.191	0.399882	0.0905471	4.41628	1.00413e-05	0.00042937	Hpcal1	1.3194
Banp/ENSMUSG00000025316.12/protein_coding	240.939	0.400227	0.104718	3.82195	0.000132401	0.00324492	Banp	1.31972
Spns2/ENSMUSG00000040447.11/protein_coding	665.713	0.401093	0.0777181	5.16086	2.45814e-07	2.08033e-05	Spns2	1.32051
Glul/ENSMUSG00000026473.11/protein_coding	4165.33	0.402902	0.100536	4.00754	6.13555e-05	0.00181266	Glul	1.32217
Tbc1d9/ENSMUSG00000031709.11/protein_coding	612.464	0.404729	0.098286	4.11787	3.82388e-05	0.00126189	Tbc1d9	1.32384
Fos/ENSMUSG00000021250.9/protein_coding	605.912	0.409028	0.0989734	4.1327	3.58522e-05	0.00119869	Fos	1.32779
Ocln/ENSMUSG00000021638.8/protein_coding	74.1568	0.411829	0.106971	3.84991	0.000118163	0.00297218	Ocln	1.33037
Ago1/ENSMUSG00000041530.12/protein_coding	224.873	0.412404	0.0974623	4.23142	2.32222e-05	0.000844156	Ago1	1.3309
Notch4/ENSMUSG00000015468.10/protein_coding	191.343	0.417216	0.0996288	4.1877	2.8179e-05	0.000991083	Notch4	1.33535
Zswim6/ENSMUSG00000032846.9/protein_coding	352.071	0.421195	0.0831121	5.06779	4.02456e-07	3.11405e-05	Zswim6	1.33904
Fat3/ENSMUSG00000074505.4/protein_coding	269.725	0.422918	0.103357	4.09183	4.27985e-05	0.00137437	Fat3	1.34064
Daam1/ENSMUSG00000034574.9/protein_coding	92.0833	0.424026	0.104444	4.05985	4.91035e-05	0.00152872	Daam1	1.34167
Sgsm2/ENSMUSG00000038351.10/protein_coding	88.6318	0.425435	0.0959309	4.4348	9.21568e-06	0.000400389	Sgsm2	1.34298
Bcr/ENSMUSG00000009681.9/protein_coding	45.0388	0.43094	0.108594	3.96837	7.23671e-05	0.00206297	Bcr	1.34811
Kcna3/ENSMUSG00000047959.3/protein_coding	67.4832	0.434036	0.104734	4.14418	3.41025e-05	0.00115204	Kcna3	1.35101
Nuak1/ENSMUSG00000020032.10/protein_coding	305.81	0.437465	0.0987433	4.43033	9.40896e-06	0.000406612	Nuak1	1.35422
Gm26527/ENSMUSG00000097582.1/lincRNA	1193.3	0.441571	0.0810639	5.44719	5.11723e-08	5.65645e-06	Gm26527	1.35808
Enc1/ENSMUSG00000041773.7/protein_coding	98.9538	0.442613	0.112144	3.94684	7.91888e-05	0.0022071	Enc1	1.35906
Bmpr2/ENSMUSG00000067336.6/protein_coding	363.082	0.443653	0.0992205	4.47139	7.77146e-06	0.000346919	Bmpr2	1.36004
Hira/ENSMUSG00000022702.11/protein_coding	81.1452	0.444929	0.097512	4.56281	5.04738e-06	0.000255498	Hira	1.36125
Dusp6/ENSMUSG00000019960.7/protein_coding	7047.29	0.445698	0.0720988	6.18177	6.33884e-10	1.37333e-07	Dusp6	1.36197
Usp35/ENSMUSG00000035713.11/protein_coding	655.953	0.450438	0.0742921	6.06306	1.33552e-09	2.55304e-07	Usp35	1.36646
RP23-388I22.1/ENSMUSG00000102503.1/TEC	22.3467	0.451637	0.112154	4.02693	5.65109e-05	0.00171314	RP23-388I22.1	1.36759
Il7r/ENSMUSG00000003882.4/protein_coding	371.723	0.456815	0.0824217	5.54241	2.98337e-08	3.67248e-06	Il7r	1.37251
Rps6ka3/ENSMUSG00000031309.11/protein_coding	143.711	0.459981	0.100952	4.55644	5.20275e-06	0.000262545	Rps6ka3	1.37552
Tnfsf13b/ENSMUSG00000031497.8/protein_coding	95.0075	0.462968	0.101087	4.57987	4.65255e-06	0.000245452	Tnfsf13b	1.37837
Src/ENSMUSG00000027646.11/protein_coding	321.577	0.463089	0.0937927	4.93737	7.91837e-07	5.69258e-05	Src	1.37849
Myc/ENSMUSG00000022346.10/protein_coding	353.728	0.463336	0.102659	4.51333	6.3817e-06	0.000308416	Myc	1.37873
Pxdc1/ENSMUSG00000021411.11/protein_coding	359.198	0.47919	0.0663231	7.22508	5.00798e-13	2.90624e-10	Pxdc1	1.39396
Hivep1/ENSMUSG00000021366.7/protein_coding	139.53	0.486458	0.095713	5.08246	3.72569e-07	2.96759e-05	Hivep1	1.401
Ier3/ENSMUSG00000003541.6/protein_coding	222.962	0.489271	0.108631	4.50395	6.6702e-06	0.000315988	Ier3	1.40374
Xcr1/ENSMUSG00000060509.4/protein_coding	13.3061	0.492859	0.108444	4.54481	5.49841e-06	0.000272389	Xcr1	1.40723
Cep97/ENSMUSG00000022604.14/protein_coding	100.096	0.493009	0.0875692	5.62994	1.80274e-08	2.35543e-06	Cep97	1.40738
Cd34/ENSMUSG00000016494.5/protein_coding	3744.68	0.495634	0.0688484	7.19892	6.0693e-13	3.18129e-10	Cd34	1.40994
Chst2/ENSMUSG00000033350.7/protein_coding	58.9937	0.502727	0.101614	4.9474	7.52121e-07	5.47849e-05	Chst2	1.41689
Gm15964/ENSMUSG00000085337.1/processed_transcript	52.143	0.513604	0.101725	5.04895	4.44236e-07	3.38892e-05	Gm15964	1.42761
Adamts1/ENSMUSG00000022893.10/protein_coding	170.379	0.533197	0.108452	4.91644	8.81332e-07	6.19946e-05	Adamts1	1.44713
Klf2/ENSMUSG00000055148.7/protein_coding	237.335	0.533851	0.110568	4.82827	1.37724e-06	8.98747e-05	Klf2	1.44779
Gm26714/ENSMUSG00000097654.1/lincRNA	27.9319	0.545876	0.113197	4.82237	1.41863e-06	9.18376e-05	Gm26714	1.45991
Htra3/ENSMUSG00000029096.11/protein_coding	169.524	0.573606	0.0944715	6.07174	1.26536e-09	2.44771e-07	Htra3	1.48824
Myo1b/ENSMUSG00000018417.10/protein_coding	799.043	0.584346	0.05051	11.5689	5.92159e-31	4.811e-27	Myo1b	1.49936
Egr1/ENSMUSG00000038418.7/protein_coding	1118.31	0.585955	0.103872	5.64112	1.68946e-08	2.25016e-06	Egr1	1.50103
Gadd45g/ENSMUSG00000021453.2/protein_coding	157.981	0.605996	0.0975217	6.21396	5.16643e-10	1.16596e-07	Gadd45g	1.52203
Tns1/ENSMUSG00000055322.10/protein_coding	948.107	0.625771	0.080695	7.75477	8.85036e-15	7.19047e-12	Tns1	1.54304
Tnf/ENSMUSG00000024401.10/protein_coding	50.982	0.660821	0.111106	5.94763	2.72045e-09	4.80485e-07	Tnf	1.58098
Sec14l2/ENSMUSG00000003585.9/protein_coding	66.7804	0.685043	0.104943	6.52774	6.6771e-11	1.87062e-08	Sec14l2	1.60775
Adora1/ENSMUSG00000042429.8/protein_coding	29.8139	0.689399	0.112596	6.12277	9.19652e-10	1.86793e-07	Adora1	1.61261
Chst1/ENSMUSG00000027221.5/protein_coding	449.952	0.69698	0.0999695	6.97193	3.12623e-12	1.10431e-09	Chst1	1.62111
Limd1/ENSMUSG00000025239.2/protein_coding	456.038	0.754216	0.0703976	10.7137	8.78176e-27	4.75649e-23	Limd1	1.68672
Ccr1l1/ENSMUSG00000064039.3/protein_coding	262.425	0.770351	0.0981627	7.8477	4.23738e-15	3.82517e-12	Ccr1l1	1.70568
AU020206/ENSMUSG00000097415.1/lincRNA	46.5095	0.792986	0.109977	7.2105	5.57476e-13	3.01948e-10	AU020206	1.73266
1810011O10Rik/ENSMUSG00000056313.5/protein_coding	90.4989	0.942449	0.111099	8.48294	2.1958e-17	3.56796e-14	1810011O10Rik	1.92179
