# Supplementary material for: Cx3cr1-deficient microglia exhibit a premature aging transcriptome
Source: Life Sci Alliance. 2019 Nov 27;2(6):e201900453. doi: 10.26508/lsa.201900453 (PMC6892408; doi:10.26508/lsa.201900453)
Supplement: Supplementary file 4 [file LSA-2019-00453_TableS4.xlsx]

## Sheet: Read Me
Comparison: 2 mo mice, WT vs KO, Rbp2 ChIP-Seq
Tab 2: RSEM output table
baseMean	Average of all samples
log2FoldChange	Log2FoldChange for Het vs WT comparison
lfcSE	Standard eror of Log2(FC)
stat	Statistic
pvalue	P-value
padj	Adjusted p-value
contrast	Comparison
Chr	Chromosome
Start	Peak start site
End	Peak end site
Strand	DNA strand
Peak Score	Peak score
Annotation	Annotation for region within gene
Detailed Annotation	Detailed annotation
Distance to TSS	Distance to transcription start site
Nearest PromoterID	Nearest promoter of a gene
Entrez ID	Entrez ID for nearest promoter
Nearest Unigene	Unigene ID for nearest promoter
Nearest Refseq	Reference sequence ID for nearest promoter
Nearest Ensembl	ENSEMBL ID for nearest promoter
Gene Name	Gene name
Gene Alias	Gene alias
Gene Description	Gene description
Gene Type	Gene type
Tab 3: Filtred list: FDR (pvalue) < 0.05

## Sheet: Cx3cr1.cor.diff.anno
baseMean	log2FoldChange	lfcSE	stat	pvalue	padj	contrast	Chr	Start	End	Strand	Peak Score	Annotation	Detailed Annotation	Distance to TSS	Nearest PromoterID	Entrez ID	Nearest Unigene	Nearest Refseq	Nearest Ensembl	Gene Name	Gene Alias	Gene Description	Gene Type
72.3365	-0.383388	0.356114	-1.07659	0.281665	0.882062	Cx3cr1WT-Cx3cr1KO	chr16	37539568	37539795	+	1000	promoter-TSS (NM_001042499)	promoter-TSS (NM_001042499)	108	NM_028812	74197	Mm.287795	NM_028812	ENSMUSG00000022828	Gtf2e1	2610024P03Rik|56kDa|AI303800|FE|TFIIE-A	general transcription factor II E, polypeptide 1 (alpha subunit)	protein-coding
81.8658	-0.302235	0.349958	-0.863633	0.387789	0.914739	Cx3cr1WT-Cx3cr1KO	chr1	133025353	133025589	+	1000	promoter-TSS (NM_001302803)	promoter-TSS (NM_001302803)	-55	NM_001302801	17248	Mm.426531	NM_008575	ENSMUSG00000054387	Mdm4	4933417N07Rik|AA414968|AL023055|AU018793|AU021806|C85810|Mdmx	transformed mouse 3T3 cell double minute 4	protein-coding
190.698	-0.428119	0.281778	-1.51935	0.128675	0.747492	Cx3cr1WT-Cx3cr1KO	chr5	137745916	137746181	+	1000	promoter-TSS (NM_029805)	promoter-TSS (NM_029805)	79	NM_029805	78829	Mm.286399	NM_023910	ENSMUSG00000029723	Tsc22d4	0610009M14Rik|1700023B23Rik|AI415410|Thg-1pit|Tilz2	TSC22 domain family, member 4	protein-coding
133.523	-0.308717	0.305142	-1.01172	0.311673	0.892713	Cx3cr1WT-Cx3cr1KO	chr5	146221309	146221560	+	1000	promoter-TSS (NM_001256086)	promoter-TSS (NM_001256086)	23	NM_028774	74132	Mm.26696	NM_028774	ENSMUSG00000029634	Rnf6	1200013I08Rik|5730419H05Rik|AA537053	ring finger protein (C3H2C3 type) 6	protein-coding
54.6462	-0.461203	0.359637	-1.28241	0.199698	0.836295	Cx3cr1WT-Cx3cr1KO	chr3	81932491	81932798	+	1000	promoter-TSS (NM_177662)	promoter-TSS (NM_177662)	43	NM_177662	229445	Mm.254642	NM_177662	ENSMUSG00000028015	Ctso	A330105D01Rik|AI118514	cathepsin O	protein-coding
80.4679	-0.728074	0.349345	-2.08411	0.03715	0.5246	Cx3cr1WT-Cx3cr1KO	chr4	99929366	99929711	+	1000	promoter-TSS (NM_028132)	promoter-TSS (NM_028132)	87	NM_028132	72157	Mm.217764	NM_028132	ENSMUSG00000025791	Pgm2	2610020G18Rik|AA407108|AI098105|Pgm-2|Pgm1	phosphoglucomutase 2	protein-coding
75.1438	-0.460776	0.347206	-1.3271	0.184476	0.820145	Cx3cr1WT-Cx3cr1KO	chr11	71004272	71004488	+	1000	promoter-TSS (NM_178367)	promoter-TSS (NM_178367)	52	NM_178367	216877	Mm.35399	NM_178367	ENSMUSG00000040620	Dhx33	3110057P17Rik|9430096J02Rik|Ddx33	DEAH (Asp-Glu-Ala-His) box polypeptide 33	protein-coding
66.416	-0.291764	0.351865	-0.829192	0.406996	0.914739	Cx3cr1WT-Cx3cr1KO	chrX	7841790	7842015	+	1000	promoter-TSS (NM_138604)	promoter-TSS (NM_138604)	71	NM_138604	54644	Mm.142827	NM_138604	ENSMUSG00000031154	Otud5	AA407879|AI553596|BB114028|DUBA|DXImx46e|Sfc7	OTU domain containing 5	protein-coding
255.995	-0.0179808	0.251472	-0.0715021	0.942998	0.996499	Cx3cr1WT-Cx3cr1KO	chr17	5491586	5491801	+	1000	promoter-TSS (NM_146073)	promoter-TSS (NM_146073)	-907	NM_146073	224454	Mm.487663	NM_146073	ENSMUSG00000034265	Zdhhc14	B530001K09Rik|New1cp	zinc finger, DHHC domain containing 14	protein-coding
56.7941	-0.365648	0.360216	-1.01508	0.310068	0.892713	Cx3cr1WT-Cx3cr1KO	chr13	43122678	43122987	+	1000	promoter-TSS (NM_001005748)	promoter-TSS (NM_001005748)	-7	NM_001005748	218194	Mm.160124	NM_198419	ENSMUSG00000054728	Phactr1	9630030F18Rik|Rpel1	phosphatase and actin regulator 1	protein-coding
258.05	-0.433851	0.252581	-1.71767	0.0858564	0.664394	Cx3cr1WT-Cx3cr1KO	chr1	91052904	91053304	+	1000	promoter-TSS (NM_001310732)	promoter-TSS (NM_001310732)	-340	NM_001111311	16978	Mm.45039	NM_008515	ENSMUSG00000026305	Lrrfip1	AU024550|Fliiap1	leucine rich repeat (in FLII) interacting protein 1	protein-coding
48.5955	-0.630042	0.363519	-1.73317	0.0830649	0.655764	Cx3cr1WT-Cx3cr1KO	chr1	91251361	91251626	+	1000	intron (NM_001355764, intron 1 of 10)	intron (NM_001355764, intron 1 of 10)	927	NM_001355764	67921	Mm.337238	NM_026454	ENSMUSG00000034343	Ube2f	2510010F15Rik|AI851109	ubiquitin-conjugating enzyme E2F (putative)	protein-coding
116.556	0.811675	0.324796	2.49903	0.0124535	0.377344	Cx3cr1WT-Cx3cr1KO	chr1	36558104	36558328	+	1000	promoter-TSS (NM_001304330)	promoter-TSS (NM_001304330)	165	NM_001126047	20353	Mm.29558	NM_001126047	ENSMUSG00000026121	Sema4c	AI426163|M-Sema F|Semacl1|Semaf|Semai|sema I	sema domain, immunoglobulin domain (Ig), transmembrane domain (TM) and short cytoplasmic domain, (semaphorin) 4C	protein-coding
84.8014	-0.0352414	0.350037	-0.100679	0.919805	0.994233	Cx3cr1WT-Cx3cr1KO	chr19	60581173	60581406	+	1000	promoter-TSS (NM_001172096)	promoter-TSS (NM_001172096)	-266	NM_001172096	78832	Mm.259026	NM_030197	ENSMUSG00000033417	Cacul1	2700078E11Rik|2810417M16Rik|9830127L17Rik|AI450346|D130033C15Rik	CDK2 associated, cullin domain 1	protein-coding
30.3668	1.1829	0.359048	3.29456	0.000985769	NA	Cx3cr1WT-Cx3cr1KO	chr7	127208514	127208754	+	1000	promoter-TSS (NM_144522)	promoter-TSS (NM_144522)	-166	NM_144522	68449	Mm.41420	NM_144522	ENSMUSG00000042492	Tbc1d10b	1110003P22Rik|C87963	TBC1 domain family, member 10b	protein-coding
42.1345	-0.108662	0.362797	-0.299511	0.76455	NA	Cx3cr1WT-Cx3cr1KO	chr5	118245194	118245405	+	1000	promoter-TSS (NM_172998)	promoter-TSS (NM_172998)	72	NM_001081236	76792	Mm.103428	NM_001081236	ENSMUSG00000032840	2410131K14Rik	-	RIKEN cDNA 2410131K14 gene	protein-coding
136.982	-0.269213	0.308213	-0.873465	0.38241	0.913976	Cx3cr1WT-Cx3cr1KO	chr6	72616557	72616842	+	1000	promoter-TSS (NM_009444)	promoter-TSS (NM_009444)	49	NM_009444	22135	Mm.246563	NM_009444		Tgoln2	TGN38B|TGN41|TGN46|Ttgn2	trans-golgi network protein 2	protein-coding
111.814	0.875453	0.333524	2.62486	0.00866848	0.321565	Cx3cr1WT-Cx3cr1KO	chr18	35498665	35498922	+	1000	5' UTR (NM_030749, exon 1 of 10)	5' UTR (NM_030749, exon 1 of 10)	132	NM_030749	81500	Mm.291482	NM_030749	ENSMUSG00000024357	Sil1	1810057E01Rik|AI042831|wz	endoplasmic reticulum chaperone SIL1 homolog (S. cerevisiae)	protein-coding
50.6791	-0.193872	0.363617	-0.533176	0.593912	0.958203	Cx3cr1WT-Cx3cr1KO	chr5	113908520	113908743	+	1000	promoter-TSS (NM_011779)	promoter-TSS (NM_011779)	75	NM_011779	23790	Mm.260158	NM_011779	ENSMUSG00000004530	Coro1c	AL022675|AW455561|AW548837	coronin, actin binding protein 1C	protein-coding
140.138	-0.21978	0.302381	-0.726832	0.467329	0.931076	Cx3cr1WT-Cx3cr1KO	chr1	190911640	190911885	+	1000	promoter-TSS (NM_178775)	promoter-TSS (NM_178775)	8	NM_178775	320119	Mm.220912	NM_178775	ENSMUSG00000089872	Rps6kc1	AA682037|B130003F20Rik|C80612|Rpk118	ribosomal protein S6 kinase polypeptide 1	protein-coding
98.6626	0.761964	0.339169	2.24656	0.0246682	0.463921	Cx3cr1WT-Cx3cr1KO	chr17	35001040	35001324	+	1000	promoter-TSS (NM_033075)	promoter-TSS (NM_033075)	275	NM_011690	22321	Mm.28420	NM_011690	ENSMUSG00000007029	Vars	Bat6|D17H6S56E|G7a|Vars2	valyl-tRNA synthetase	protein-coding
332.75	-0.570821	0.242889	-2.35013	0.0187667	0.430522	Cx3cr1WT-Cx3cr1KO	chr15	78773286	78773539	+	1000	promoter-TSS (NM_008595)	promoter-TSS (NM_008595)	33	NM_008595	17305	Mm.149235	NM_008595	ENSMUSG00000018169	Mfng	AW546563	MFNG O-fucosylpeptide 3-beta-N-acetylglucosaminyltransferase	protein-coding
57.8753	0.0237046	0.360196	0.0658104	0.947529	0.997218	Cx3cr1WT-Cx3cr1KO	chr12	52097665	52097892	+	1000	promoter-TSS (NM_029760)	promoter-TSS (NM_029760)	32	NM_029760	76826	Mm.244781	NM_029760	ENSMUSG00000035142	Nubpl	2410170E07Rik	nucleotide binding protein-like	protein-coding
142.214	-0.276934	0.298018	-0.929251	0.352759	0.902562	Cx3cr1WT-Cx3cr1KO	chr4	155221569	155221876	+	1000	exon (NM_011385, exon 1 of 7)	exon (NM_011385, exon 1 of 7)	813	NM_011385	20481	Mm.28520	NM_011385	ENSMUSG00000029050	Ski	2310012I02Rik|2610001A11Rik|AA062172|AA589460|BC004088	ski sarcoma viral oncogene homolog (avian)	protein-coding
121.247	0.360404	0.336448	1.0712	0.284079	0.883295	Cx3cr1WT-Cx3cr1KO	chr11	40755103	40755349	+	1000	promoter-TSS (NM_009831)	promoter-TSS (NM_009831)	60	NM_009831	12450	Mm.2103	NM_009831	ENSMUSG00000020326	Ccng1	AI314029	cyclin G1	protein-coding
53.5066	0.0994315	0.36336	0.273645	0.784358	0.986928	Cx3cr1WT-Cx3cr1KO	chr2	29935180	29935376	+	1000	promoter-TSS (NM_028923)	promoter-TSS (NM_028923)	-131	NM_028923	74412	Mm.275121	NM_028923	ENSMUSG00000019715	Gle1	4933405K21Rik|AA553313|Gle1l	GLE1 RNA export mediator (yeast)	protein-coding
108.339	0.251685	0.321959	0.781729	0.434374	0.924781	Cx3cr1WT-Cx3cr1KO	chr17	48346431	48346687	+	1000	exon (NM_001272078, exon 1 of 5)	exon (NM_001272078, exon 1 of 5)	158	NM_001272078	83433	Mm.261623	NM_031254	ENSMUSG00000023992	Trem2	TREM-2|Trem2a|Trem2b|Trem2c	triggering receptor expressed on myeloid cells 2	protein-coding
37.0038	-0.519304	0.362826	-1.43128	0.152351	NA	Cx3cr1WT-Cx3cr1KO	chr7	129591753	129592099	+	1000	promoter-TSS (NM_172255)	promoter-TSS (NM_172255)	63	NM_172255	207425	Mm.229323	NM_172255	ENSMUSG00000042055	Wdr11	2900055P10Rik|AW489876|Brwd2|mKIAA1351	WD repeat domain 11	protein-coding
160.497	0.000698598	0.328533	0.00212642	0.998303	0.999755	Cx3cr1WT-Cx3cr1KO	chr19	42753124	42753385	+	1000	promoter-TSS (NM_029011)	promoter-TSS (NM_029011)	-479	NM_029011	74580	Mm.329858	NM_029011	ENSMUSG00000060224	Pyroxd2	3830409H07Rik|4833409A17Rik	pyridine nucleotide-disulphide oxidoreductase domain 2	protein-coding
90.8639	0.15376	0.335995	0.457625	0.647222	0.970357	Cx3cr1WT-Cx3cr1KO	chr8	119778215	119778445	+	1000	promoter-TSS (NM_028883)	promoter-TSS (NM_028883)	86	NM_028883	74347	Mm.358759	NM_028883	ENSMUSG00000034105	Tldc1	4632415K11Rik|Kiaa1609	TBC/LysM associated domain containing 1	protein-coding
321.145	0.388451	0.254913	1.52386	0.127544	0.745181	Cx3cr1WT-Cx3cr1KO	chr12	44268903	44269323	+	1000	promoter-TSS (NM_026164)	promoter-TSS (NM_026164)	-41	NM_026164	67452	Mm.54126	NM_026164	ENSMUSG00000036257	Pnpla8	1200006O19Rik|AI467579|Ipla2(gamma)	patatin-like phospholipase domain containing 8	protein-coding
63.38	-0.474574	0.35572	-1.33412	0.182164	0.818828	Cx3cr1WT-Cx3cr1KO	chr8	57652717	57652945	+	1000	intron (NR_040698, intron 1 of 3)	CpG	224	NM_001167981	108150	Mm.62886	NM_144731	ENSMUSG00000031608	Galnt7	AI225872	polypeptide N-acetylgalactosaminyltransferase 7	protein-coding
279.412	0.137775	0.242427	0.568318	0.569819	0.953728	Cx3cr1WT-Cx3cr1KO	chr11	59541500	59541713	+	1000	promoter-TSS (NM_001359638)	promoter-TSS (NM_001359638)	37	NM_001359638	216799	Mm.54174	NM_145827	ENSMUSG00000032691	Nlrp3	AGTAVPRL|AII/AVP|Cias1|FCAS|FCU|MWS|Mmig1|NALP3|Pypaf1	NLR family, pyrin domain containing 3	protein-coding
46.9058	-0.108505	0.363025	-0.298891	0.765024	0.983463	Cx3cr1WT-Cx3cr1KO	chr7	24081850	24082113	+	1000	promoter-TSS (NM_001045486)	promoter-TSS (NM_001045486)	84	NM_001289637	210135	Mm.32254	NM_172483	ENSMUSG00000057101	Zfp180	2310040I01Rik|AI852378|D130011P11|HHZ168	zinc finger protein 180	protein-coding
46.5899	0.0945519	0.362455	0.260866	0.794196	NA	Cx3cr1WT-Cx3cr1KO	chr6	126939945	126940163	+	1000	promoter-TSS (NM_138594)	promoter-TSS (NM_138594)	88	NM_138594	28040	Mm.44228	NM_138594	ENSMUSG00000030347	D6Wsu163e	C12orf4	DNA segment, Chr 6, Wayne State University 163, expressed	protein-coding
35.2301	-0.435241	0.360708	-1.20663	0.227575	NA	Cx3cr1WT-Cx3cr1KO	chr17	47689003	47689254	+	1000	promoter-TSS (NM_025365)	promoter-TSS (NM_025365)	-742	NM_001164729	66119	Mm.89912	NM_025365	ENSMUSG00000033475	Tomm6	1110002E23Rik|AI663970	translocase of outer mitochondrial membrane 6	protein-coding
30.5694	-0.217873	0.359247	-0.606471	0.544202	NA	Cx3cr1WT-Cx3cr1KO	chr4	132311052	132311322	+	1000	TTS (NM_027925)	TTS (NM_027925)	484	NR_028537	100217437		NR_028537		Snord99	MBII-420	small nucleolar RNA, C/D box 99	snoRNA
112.576	-0.0675809	0.324893	-0.208009	0.835222	0.991565	Cx3cr1WT-Cx3cr1KO	chr13	55362406	55362790	+	1000	5' UTR (NM_025828, exon 1 of 8)	5' UTR (NM_025828, exon 1 of 8)	185	NM_025828	66890	Mm.38868	NM_025828	ENSMUSG00000021484	Lman2	1110003H06Rik|1300009F09Rik|AA408240|AL023023|AU040819|GP36B|VIP36	lectin, mannose-binding 2	protein-coding
268.214	0.423125	0.241331	1.7533	0.0795507	0.655764	Cx3cr1WT-Cx3cr1KO	chr3	58525608	58525841	+	1000	promoter-TSS (NM_001005509)	promoter-TSS (NM_001005509)	-97	NM_001005509	229317	Mm.21617	NM_001005509	ENSMUSG00000027810	Eif2a	D030048D22|D3Ertd194e	eukaryotic translation initiation factor 2A	protein-coding
397.202	-0.417065	0.209641	-1.98942	0.0466544	0.559945	Cx3cr1WT-Cx3cr1KO	chr11	48817514	48817720	+	1000	promoter-TSS (NM_145377)	promoter-TSS (NM_145377)	-226	NM_145377	211007	Mm.794	NM_145377	ENSMUSG00000040365	Trim41	AW552703|BC020156|R75223|RINCK	tripartite motif-containing 41	protein-coding
419.863	-0.167306	0.209803	-0.797443	0.425194	0.919373	Cx3cr1WT-Cx3cr1KO	chr17	57279047	57279272	+	1000	promoter-TSS (NM_011691)	promoter-TSS (NM_011691)	59	NM_001163815	22324	Mm.248172	NM_011691	ENSMUSG00000034116	Vav1	Vav|vav-T	vav 1 oncogene	protein-coding
111.088	0.560784	0.333698	1.68051	0.0928582	0.684735	Cx3cr1WT-Cx3cr1KO	chrX	12159898	12160213	+	1000	intron (NR_045434, intron 1 of 3)	CpG	291	NR_045434	71458	Mm.196328	NM_029510	ENSMUSG00000040363	Bcor	2900008C10Rik|5830466J11Rik|8430401K06Rik|BcorR|D930024N20Rik|mKIAA1575	BCL6 interacting corepressor	protein-coding
309.927	0.223048	0.235387	0.947583	0.343342	0.902562	Cx3cr1WT-Cx3cr1KO	chr2	128127238	128127478	+	1000	promoter-TSS (NM_001284410)	promoter-TSS (NM_001284410)	-217	NM_001284410	12125	Mm.141083	NM_009754	ENSMUSG00000027381	Bcl2l11	1500006F24Rik|Bim|Bod|bcl2-L-11	BCL2-like 11 (apoptosis facilitator)	protein-coding
127.414	0.511889	0.327803	1.56158	0.118388	0.732033	Cx3cr1WT-Cx3cr1KO	chr13	54687561	54687775	+	1000	5' UTR (NM_001146025, exon 1 of 11)	5' UTR (NM_001146025, exon 1 of 11)	140	NM_001146025	105239	Mm.25366	NM_134064	ENSMUSG00000034928	Rnf44	AI854545|mKIAA1100	ring finger protein 44	protein-coding
49.9013	-0.481139	0.35474	-1.35631	0.175	0.814491	Cx3cr1WT-Cx3cr1KO	chr11	75440104	75440366	+	1000	promoter-TSS (NM_008878)	promoter-TSS (NM_008878)	-734	NM_008878	18816	Mm.279733	NM_008878	ENSMUSG00000038224	Serpinf2	AI747498|Pli|Serpimf2	serine (or cysteine) peptidase inhibitor, clade F, member 2	protein-coding
167.217	0.177113	0.286993	0.617135	0.537146	0.947185	Cx3cr1WT-Cx3cr1KO	chr8	69791061	69791364	+	1000	promoter-TSS (NM_133224)	promoter-TSS (NM_133224)	49	NM_133224	170759	Mm.186066	NM_133224	ENSMUSG00000031862	Atp13a1	Atp13a|Cgi152|catp	ATPase type 13A1	protein-coding
71.6656	0.0558529	0.352073	0.15864	0.873952	0.993944	Cx3cr1WT-Cx3cr1KO	chr17	47368826	47369049	+	1000	promoter-TSS (NM_001146212)	promoter-TSS (NM_001146212)	50	NM_001146211	64657	Mm.216250	NM_183086	ENSMUSG00000034729	Mrps10	1110038B19Rik|AW743084|Rpms10	mitochondrial ribosomal protein S10	protein-coding
51.5652	0.0980425	0.362233	0.270662	0.786651	0.98724	Cx3cr1WT-Cx3cr1KO	chr9	108808380	108808591	+	1000	exon (NM_030729, exon 1 of 13)	exon (NM_030729, exon 1 of 13)	105	NM_030729	80987	Mm.192416	NM_030729	ENSMUSG00000032598	Nckipsd	AF3P21|DIP1|ORF1|SPIN90|WASLBP|WISH|Wasbp	NCK interacting protein with SH3 domain	protein-coding
344.594	0.332963	0.223467	1.48999	0.136228	0.758746	Cx3cr1WT-Cx3cr1KO	chr19	8713697	8713936	+	1000	promoter-TSS (NM_008577)	promoter-TSS (NM_008577)	81	NM_008577	17254	Mm.4114	NM_008577	ENSMUSG00000010095	Slc3a2	4F2|4F2HC|AI314110|Cd98|Ly-10|Ly-m10|Ly10|Mdu1|Mgp-2hc|NACAE	solute carrier family 3 (activators of dibasic and neutral amino acid transport), member 2	protein-coding
252.027	-0.181774	0.25663	-0.708312	0.478751	0.931076	Cx3cr1WT-Cx3cr1KO	chr15	74955407	74955792	+	1000	5' UTR (NM_001164036, exon 1 of 4)	5' UTR (NM_001164036, exon 1 of 4)	493	NM_001164040	17069	Mm.788	NM_008529	ENSMUSG00000022587	Ly6e	Ly67|RIG-E|Sca-2|TSA-1|Tsa1	lymphocyte antigen 6 complex, locus E	protein-coding
48.2437	-0.270006	0.363606	-0.742576	0.457738	0.931076	Cx3cr1WT-Cx3cr1KO	chr1	179517860	179518107	+	1000	promoter-TSS (NM_027188)	promoter-TSS (NM_027188)	58	NM_027188	69726	Mm.222338	NM_027188	ENSMUSG00000055067	Smyd3	2410008A19Rik|Zmynd1	SET and MYND domain containing 3	protein-coding
142.646	-0.0357479	0.304228	-0.117504	0.906461	0.993944	Cx3cr1WT-Cx3cr1KO	chr9	86571627	86571885	+	1000	promoter-TSS (NM_001145969)	promoter-TSS (NM_001145969)	86	NM_001163746	109785	Mm.390201	NM_028352	ENSMUSG00000056131	Pgm3	2810473H05Rik|Agm1|BB187688|C77933|PAGM|Pgm-3	phosphoglucomutase 3	protein-coding
30.584	0.476471	0.360344	1.32227	0.186079	NA	Cx3cr1WT-Cx3cr1KO	chr16	5007959	5008176	+	1000	TTS (NM_133185)	TTS (NM_133185)	751	NR_045596	432995	Mm.271618	NM_001253796	ENSMUSG00000096215	Smim22	EG432995|Gm5480	small integral membrane protein 22	protein-coding
37.5287	0.594963	0.360186	1.65182	0.0985714	NA	Cx3cr1WT-Cx3cr1KO	chr10	79097357	79097645	+	1000	promoter-TSS (NM_001359717)	promoter-TSS (NM_001359717)	99	NM_001359715	72128	Mm.297854	NM_001004362	ENSMUSG00000060301	2610008E11Rik	-	RIKEN cDNA 2610008E11 gene	protein-coding
295.916	-0.141009	0.232751	-0.605837	0.544623	0.949794	Cx3cr1WT-Cx3cr1KO	chr11	103267228	103267454	+	1000	promoter-TSS (NM_016896)	promoter-TSS (NM_016896)	60	NM_016896	53859	Mm.158981	NM_016896	ENSMUSG00000020941	Map3k14	Nik|aly	mitogen-activated protein kinase kinase kinase 14	protein-coding
72.4773	-0.270914	0.356844	-0.759193	0.447737	0.927742	Cx3cr1WT-Cx3cr1KO	chr11	29693675	29693885	+	1000	promoter-TSS (NM_194051)	promoter-TSS (NM_194051)	6	NM_194051	68585	Mm.192580	NM_024226	ENSMUSG00000020458	Rtn4	1110020G17Rik|AA407876|AA409940|AA960376|ASY|C130026I10Rik|NOGO|NSP-CL|NgA|Nogo-A|Nogo-B|Nogo-C|mKIAA0886|mKIAA4153	reticulon 4	protein-coding
99.3335	0.766054	0.325421	2.35404	0.0185706	0.430522	Cx3cr1WT-Cx3cr1KO	chr2	62646006	62646353	+	1000	promoter-TSS (NM_027835)	promoter-TSS (NM_027835)	76	NM_027835	71586	Mm.136224	NM_027835	ENSMUSG00000026896	Ifih1	9130009C22Rik|Helicard|Hlcd|MDA5|RLR-2	interferon induced with helicase C domain 1	protein-coding
146.337	-0.369667	0.308104	-1.19981	0.230212	0.854474	Cx3cr1WT-Cx3cr1KO	chr2	30415609	30415820	+	1000	promoter-TSS (NM_007760)	promoter-TSS (NM_007760)	34	NM_007760	12908	Mm.20396	NM_007760	ENSMUSG00000026853	Crat	AW107812|CARAT	carnitine acetyltransferase	protein-coding
126.843	-0.390002	0.311815	-1.25075	0.211027	0.84677	Cx3cr1WT-Cx3cr1KO	chr16	4624722	4625054	+	1000	promoter-TSS (NM_025571)	promoter-TSS (NM_025571)	58	NM_025571	66449	Mm.354760	NM_025571	ENSMUSG00000014301	Pam16	2010110I09Rik|AV006767|CGI-136|Magmas|Tim16|Timm16	presequence translocase-asssociated motor 16 homolog (S. cerevisiae)	protein-coding
158.819	-0.219998	0.319675	-0.688192	0.491332	0.933577	Cx3cr1WT-Cx3cr1KO	chr9	57261556	57261811	+	1000	intron (NM_028820, intron 1 of 2)	CpG	916	NM_028820	74211	Mm.428905	NM_028820	ENSMUSG00000032300	1700017B05Rik	AA682102|D9Ertd278e	RIKEN cDNA 1700017B05 gene	protein-coding
232.328	0.251721	0.261375	0.963065	0.335515	0.902562	Cx3cr1WT-Cx3cr1KO	chr6	56797681	56797997	+	1000	promoter-TSS (NM_145958)	promoter-TSS (NM_145958)	-26	NM_001362213	210973	Mm.57295	NM_145958	ENSMUSG00000059486	Kbtbd2	BC022962|Bklhd1|mKIAA1489	kelch repeat and BTB (POZ) domain containing 2	protein-coding
65.2208	-0.111029	0.355085	-0.312682	0.754523	0.983463	Cx3cr1WT-Cx3cr1KO	chr7	44850320	44850558	+	1000	TTS (NR_030488)	TTS (NR_030488)	432	NM_001253920	67605	Mm.148007	NM_026270	ENSMUSG00000011096	Akt1s1	1110012J22Rik|AI227026|Lobe|Lobel|PRAS40	AKT1 substrate 1 (proline-rich)	protein-coding
77.3863	-0.0700892	0.343754	-0.203893	0.838437	0.991871	Cx3cr1WT-Cx3cr1KO	chr8	105937933	105938185	+	1000	5' UTR (NM_013640, exon 1 of 8)	5' UTR (NM_013640, exon 1 of 8)	333	NM_013640	19171	Mm.787	NM_013640	ENSMUSG00000031897	Psmb10	Mecl-1|Mecl1	proteasome (prosome, macropain) subunit, beta type 10	protein-coding
64.5506	-0.264254	0.358479	-0.737153	0.461029	0.931076	Cx3cr1WT-Cx3cr1KO	chr19	46152448	46152667	+	1000	promoter-TSS (NM_178930)	promoter-TSS (NM_178930)	-1	NM_178930	107338	Mm.271620	NM_178930	ENSMUSG00000025224	Gbf1	1700083E03Rik|AI035702|AW049900|mKIAA0248	golgi-specific brefeldin A-resistance factor 1	protein-coding
102.813	-0.171999	0.325893	-0.527778	0.597653	0.958359	Cx3cr1WT-Cx3cr1KO	chr11	115491677	115491911	+	1000	promoter-TSS (NM_015807)	promoter-TSS (NM_015807)	20	NM_015807	50773	Mm.390379	NM_015807	ENSMUSG00000020736	Nt5c	Dnt|Dnt1|Umph-2|Umph2	5',3'-nucleotidase, cytosolic	protein-coding
89.9774	-0.739112	0.337488	-2.19004	0.0285214	0.480051	Cx3cr1WT-Cx3cr1KO	chr11	3539087	3539368	+	1000	promoter-TSS (NM_001284429)	promoter-TSS (NM_001284429)	65	NM_013870	29856	Mm.188516	NM_013870	ENSMUSG00000020439	Smtn	smsmo	smoothelin	protein-coding
25.2388	-0.377962	0.356147	-1.06125	0.288574	NA	Cx3cr1WT-Cx3cr1KO	chr17	85090102	85090316	+	1000	promoter-TSS (NM_001163624)	promoter-TSS (NM_001163624)	58	NM_145984	213760	Mm.259035	NM_145984	ENSMUSG00000024127	Prepl	2810457N15Rik|9530014L06Rik|D030028O16Rik|mKIAA0436	prolyl endopeptidase-like	protein-coding
179.675	-0.0879965	0.284666	-0.309122	0.757229	0.983463	Cx3cr1WT-Cx3cr1KO	chr6	72097299	72097506	+	1000	promoter-TSS (NM_011375)	promoter-TSS (NM_011375)	-206	NM_001035228	20454	Mm.38248	NM_011375	ENSMUSG00000056091	St3gal5	3S-T|Siat9|[a]2	ST3 beta-galactoside alpha-2,3-sialyltransferase 5	protein-coding
62.3619	0.488097	0.360454	1.35412	0.175698	0.814491	Cx3cr1WT-Cx3cr1KO	chr7	80402929	80403185	+	1000	promoter-TSS (NM_011046)	promoter-TSS (NM_011046)	-245	NM_011046	18550	Mm.5241	NM_011046	ENSMUSG00000030530	Furin	9130404I01Rik|Fur|PACE|Pcsk3|SPC1	furin (paired basic amino acid cleaving enzyme)	protein-coding
102.235	0.536273	0.331029	1.62002	0.105228	0.709811	Cx3cr1WT-Cx3cr1KO	chr4	41713332	41713593	+	1000	promoter-TSS (NM_027278)	promoter-TSS (NM_027278)	55	NM_027278	69961	Mm.425182	NM_027278	ENSMUSG00000036114	Rpp25l	2810432D09Rik|AW987258|Rppl25	ribonuclease P/MRP 25 subunit-like	protein-coding
47.6034	0.135755	0.361672	0.375354	0.707398	0.979914	Cx3cr1WT-Cx3cr1KO	chr10	109999993	110000207	+	1000	exon (NM_001081035, exon 1 of 39)	exon (NM_001081035, exon 1 of 39)	119	NM_001081035	260315	Mm.225050	NM_177797	ENSMUSG00000020181	Nav3	4732483H20Rik|9630020C08Rik|POMFIL1|Pomfil1p|mKIAA0938|unc53H3	neuron navigator 3	protein-coding
71.153	-0.0425781	0.353361	-0.120495	0.904091	0.993944	Cx3cr1WT-Cx3cr1KO	chr4	155066984	155067232	+	1000	promoter-TSS (NM_001042407)	promoter-TSS (NM_001042407)	78	NM_001042407	668173	Mm.133114	NM_001042407	ENSMUSG00000029047	Pex10	AV128229|Gm142	peroxisomal biogenesis factor 10	protein-coding
42.9188	-0.229624	0.363591	-0.631546	0.527684	NA	Cx3cr1WT-Cx3cr1KO	chr3	129901392	129901700	+	1000	intron (NM_009811, intron 1 of 6)	CpG	131	NM_009811	12368	Mm.281379	NM_009811	ENSMUSG00000027997	Casp6	CASP-6|Mch2	caspase 6	protein-coding
232.325	-0.306886	0.257615	-1.19126	0.233552	0.85955	Cx3cr1WT-Cx3cr1KO	chr2	156312379	156312677	+	1000	promoter-TSS (NM_001316755)	promoter-TSS (NM_001316755)	55	NM_001316755	70873	Mm.475234	NM_027585	ENSMUSG00000038085	Cnbd2	4921517L17Rik|5430421B09Rik|Cris	cyclic nucleotide binding domain containing 2	protein-coding
183.79	-0.17218	0.277368	-0.620763	0.534755	0.947185	Cx3cr1WT-Cx3cr1KO	chrX	155216069	155216455	+	1000	5' UTR (NM_001291865, exon 1 of 7)	5' UTR (NM_001291865, exon 1 of 7)	187	NM_009121	20229	Mm.2734	NM_009121	ENSMUSG00000025283	Sat1	AA617398|SSAT|Sat	spermidine/spermine N1-acetyl transferase 1	protein-coding
56.3206	0.557452	0.356559	1.56342	0.117953	0.73045	Cx3cr1WT-Cx3cr1KO	chr12	99563303	99563630	+	1000	promoter-TSS (NR_136760)	promoter-TSS (NR_136760)	-375	NR_136760	102639404	Mm.396324	NR_136760	ENSMUSG00000097917	Gm26839	-	predicted gene, 26839	ncRNA
136.274	0.207389	0.323966	0.640156	0.522071	0.946726	Cx3cr1WT-Cx3cr1KO	chr3	88553399	88553661	+	1000	promoter-TSS (NM_033526)	promoter-TSS (NM_033526)	-186	NM_033526	94232	Mm.303059	NM_033526	ENSMUSG00000008604	Ubqln4	A1Up|A1u|AI663987|CIP75|UBIN	ubiquilin 4	protein-coding
137.615	0.52184	0.3228	1.6166	0.105964	0.712421	Cx3cr1WT-Cx3cr1KO	chr11	116130621	116130841	+	1000	exon (NM_178802, exon 1 of 6)	exon (NM_178802, exon 1 of 6)	397	NM_178802	338364	Mm.439976	NM_178802	ENSMUSG00000054517	Trim65	4732463G12Rik	tripartite motif-containing 65	protein-coding
39.5659	-0.200977	0.36267	-0.554159	0.57947	NA	Cx3cr1WT-Cx3cr1KO	chr11	96944177	96944376	+	1000	promoter-TSS (NM_134021)	promoter-TSS (NM_134021)	130	NR_003293	319371	Mm.436865	NR_003293	ENSMUSG00000078700	D030028A08Rik	-	RIKEN cDNA D030028A08 gene	ncRNA
229.876	-0.203502	0.259611	-0.783872	0.433115	0.923458	Cx3cr1WT-Cx3cr1KO	chr7	141455153	141455362	+	1000	promoter-TSS (NM_001163689)	promoter-TSS (NM_001163689)	69	NM_001163689	66853	Mm.29998	NM_025802	ENSMUSG00000025509	Pnpla2	0610039C21Rik|1110001C14Rik|Atgl|TTS-2.2	patatin-like phospholipase domain containing 2	protein-coding
42.9318	-0.228439	0.363106	-0.629124	0.529268	NA	Cx3cr1WT-Cx3cr1KO	chr5	121397890	121398114	+	1000	promoter-TSS (NM_172722)	promoter-TSS (NM_172722)	20	NM_172722	231713	Mm.33919	NM_172722	ENSMUSG00000042719	Naa25	4833422K13Rik|A630046C11|AI450868|C330023M02Rik|Mdm20	N(alpha)-acetyltransferase 25, NatB auxiliary subunit	protein-coding
40.6053	1.15117	0.355721	3.23616	0.00121148	NA	Cx3cr1WT-Cx3cr1KO	chr8	57652381	57652583	+	1000	intron (NR_040698, intron 1 of 3)	CpG	573	NM_001167981	108150	Mm.62886	NM_144731	ENSMUSG00000031608	Galnt7	AI225872	polypeptide N-acetylgalactosaminyltransferase 7	protein-coding
199.494	0.105275	0.270683	0.388925	0.697332	0.978679	Cx3cr1WT-Cx3cr1KO	chr18	38250123	38250415	+	1000	promoter-TSS (NM_024179)	promoter-TSS (NM_024179)	20	NM_024179	66839	Mm.281086	NM_024179	ENSMUSG00000024442	0610009O20Rik	2700004E22Rik|Dele|Kiaa0141	RIKEN cDNA 0610009O20 gene	protein-coding
57.8708	-0.0578697	0.357226	-0.161997	0.871308	0.993944	Cx3cr1WT-Cx3cr1KO	chr4	34687247	34687502	+	1000	promoter-TSS (NM_011895)	promoter-TSS (NM_011895)	64	NM_011895	24060	Mm.281885	NM_011895	ENSMUSG00000028293	Slc35a1	AA408150|AI314851	solute carrier family 35 (CMP-sialic acid transporter), member 1	protein-coding
174.497	0.274593	0.301985	0.909293	0.363196	0.906402	Cx3cr1WT-Cx3cr1KO	chr17	48410066	48410361	+	1000	promoter-TSS (NM_001357904)	promoter-TSS (NM_001357904)	213	NM_207219	106821	Mm.203943	NM_207219	ENSMUSG00000040771	Oard1	AI314976|AW558560	O-acyl-ADP-ribose deacylase 1	protein-coding
135.886	0.0735462	0.309256	0.237817	0.812023	0.98788	Cx3cr1WT-Cx3cr1KO	chr18	65583810	65584146	+	1000	intron (NM_001361051, intron 1 of 8)	intron (NM_001361051, intron 1 of 8)	777	NM_001361051	328977	Mm.286232	NM_207255	ENSMUSG00000042439	Zfp532	C530030I18Rik|Znf532|mKIAA1629	zinc finger protein 532	protein-coding
321.173	0.082056	0.251807	0.325868	0.744524	0.98239	Cx3cr1WT-Cx3cr1KO	chr19	9899656	9899880	+	1000	promoter-TSS (NM_016692)	promoter-TSS (NM_016692)	-235	NM_016692	16319	Mm.29755	NM_016692	ENSMUSG00000024660	Incenp	2700067E22Rik|AU019509|C130081E20|C77457	inner centromere protein	protein-coding
93.603	0.419952	0.329905	1.27295	0.203037	0.839604	Cx3cr1WT-Cx3cr1KO	chr17	30576480	30576695	+	1000	promoter-TSS (NM_027060)	promoter-TSS (NM_027060)	-300	NM_027060	224671	Mm.41220	NM_027060	ENSMUSG00000062202	Btbd9	1700023F20Rik|4930402L05|AI464421	BTB (POZ) domain containing 9	protein-coding
101.232	0.338036	0.330705	1.02217	0.306701	0.892713	Cx3cr1WT-Cx3cr1KO	chr18	44828774	44829008	+	1000	exon (NM_001163013, exon 1 of 30)	exon (NM_001163013, exon 1 of 30)	226	NM_001163013	240255	Mm.244482	NM_001163013	ENSMUSG00000034653	Ythdc2	3010002F02Rik|BC037178	YTH domain containing 2	protein-coding
103.694	-0.402461	0.331511	-1.21402	0.22474	0.854106	Cx3cr1WT-Cx3cr1KO	chr16	85802961	85803181	+	1000	promoter-TSS (NM_009621)	promoter-TSS (NM_009621)	42	NM_009621	11504	Mm.1421	NM_009621	ENSMUSG00000022893	Adamts1	ADAM-TS1|ADAMTS|ADAMTS-1|C3-C5|METH-1|METH1	a disintegrin-like and metallopeptidase (reprolysin type) with thrombospondin type 1 motif, 1	protein-coding
78.5676	-0.27162	0.350703	-0.774503	0.438634	0.926418	Cx3cr1WT-Cx3cr1KO	chr18	74778570	74778821	+	1000	promoter-TSS (NR_028560)	promoter-TSS (NR_028560)	-240	NR_028560	100217466		NR_028560		Scarna17	MBII-119	small Cajal body-specific RNA 17	ncRNA
307.727	0.3104	0.241768	1.28388	0.199185	0.836295	Cx3cr1WT-Cx3cr1KO	chr3	135438594	135438822	+	1000	promoter-TSS (NR_030689)	promoter-TSS (NR_030689)	7	NM_025356	66105	Mm.49884	NM_025356	ENSMUSG00000078578	Ube2d3	1100001F19Rik|9430029A22Rik|AA414951	ubiquitin-conjugating enzyme E2D 3	protein-coding
203.332	-0.369026	0.267563	-1.37921	0.16783	0.808104	Cx3cr1WT-Cx3cr1KO	chr3	96293801	96294041	+	1000	promoter-TSS (NM_010186)	promoter-TSS (NM_010186)	48	NM_010186	14129	Mm.150	NM_010186	ENSMUSG00000015947	Fcgr1	AI323638|AV092959|CD64|FcgammaRI|IGGHAFC	Fc receptor, IgG, high affinity I	protein-coding
147.242	-0.0345809	0.309958	-0.111567	0.911167	0.993944	Cx3cr1WT-Cx3cr1KO	chr17	35126310	35126559	+	1000	promoter-TSS (NM_033477)	promoter-TSS (NM_033477)	32	NM_033477	114585	Mm.42070	NM_033477	ENSMUSG00000043311	D17H6S53E	G4|NG34	DNA segment, Chr 17, human D6S53E	protein-coding
168.014	0.172059	0.30956	0.555817	0.578336	0.955217	Cx3cr1WT-Cx3cr1KO	chr17	12916377	12916598	+	1000	promoter-TSS (NM_026310)	promoter-TSS (NM_026310)	158	NM_013686	21454	Mm.229342	NM_013686	ENSMUSG00000068039	Tcp1	AI528772|CCT|Cct1|Ccta|TRic|Tcp-1|Tp63|c-cpn|p63	t-complex protein 1	protein-coding
241.091	-0.265544	0.296574	-0.895373	0.370588	0.909567	Cx3cr1WT-Cx3cr1KO	chr8	84840513	84840723	+	1000	promoter-TSS (NM_001297607)	promoter-TSS (NM_001297607)	47	NM_001297607	19358	Mm.255539	NM_009010	ENSMUSG00000003813	Rad23a	2310040P19Rik|AL024030|HR23A|mHR23A	RAD23 homolog A, nucleotide excision repair protein	protein-coding
155.67	0.481137	0.294037	1.63632	0.101773	0.705177	Cx3cr1WT-Cx3cr1KO	chr10	79704424	79704649	+	1000	exon (NM_009768, exon 1 of 8)	exon (NM_009768, exon 1 of 8)	178	NM_009768	12215	Mm.726	NM_009768	ENSMUSG00000023175	Bsg	AI115436|AI325119|CD147|EMMPRIN|HT-7	basigin	protein-coding
64.73	-0.254758	0.354906	-0.717816	0.472871	0.931076	Cx3cr1WT-Cx3cr1KO	chr7	25680733	25680959	+	1000	promoter-TSS (NM_001362154)	promoter-TSS (NM_001362154)	66	NM_001362154	232987	Mm.22849	NM_172148	ENSMUSG00000063439	B9d2	stumpy	B9 protein domain 2	protein-coding
56.72	0.648605	0.360274	1.80031	0.0718117	0.637069	Cx3cr1WT-Cx3cr1KO	chr1	39478502	39478767	+	1000	5' UTR (NM_001357522, exon 1 of 19)	5' UTR (NM_001357522, exon 1 of 19)	113	NM_018775	54610	Mm.387293	NM_018775	ENSMUSG00000003134	Tbc1d8	AD3|HBLP1|VRP	TBC1 domain family, member 8	protein-coding
101.772	0.121031	0.327626	0.36942	0.711815	0.981042	Cx3cr1WT-Cx3cr1KO	chr4	63558772	63559034	+	1000	5' UTR (NM_001356354, exon 1 of 10)	5' UTR (NM_001356354, exon 1 of 10)	140	NM_001356354	230279	Mm.41523	NM_144905	ENSMUSG00000045917	Tmem268	6330416G13Rik|AW492431|bM230C2.2	transmembrane protein 268	protein-coding
82.374	-0.0379562	0.341191	-0.111246	0.911421	0.993944	Cx3cr1WT-Cx3cr1KO	chr5	115119133	115119360	+	1000	promoter-TSS (NM_007383)	promoter-TSS (NM_007383)	100	NM_007383	11409	Mm.18759	NM_007383	ENSMUSG00000029545	Acads	AI196007|Bcd-1|Bcd1|Hdlq8|SCAD	acyl-Coenzyme A dehydrogenase, short chain	protein-coding
56.0006	-0.274181	0.357756	-0.766392	0.443443	0.926673	Cx3cr1WT-Cx3cr1KO	chr10	26772323	26772637	+	1000	promoter-TSS (NM_176837)	promoter-TSS (NM_176837)	-32	NM_176837	73910	Mm.356496	NM_176837	ENSMUSG00000039031	Arhgap18	4833419J07Rik|AI314906|AI843501	Rho GTPase activating protein 18	protein-coding
103.609	-0.103495	0.326578	-0.316908	0.751314	0.982855	Cx3cr1WT-Cx3cr1KO	chr9	107541964	107542294	+	1000	promoter-TSS (NM_019720)	promoter-TSS (NM_019720)	64	NM_001357290	56368	Mm.24833	NM_019720	ENSMUSG00000037190	Cyb561d2	AW049681|Tsp10	cytochrome b-561 domain containing 2	protein-coding
50.16	-0.576696	0.361839	-1.59379	0.110983	0.714959	Cx3cr1WT-Cx3cr1KO	chr11	116168012	116168230	+	1000	promoter-TSS (NM_172571)	promoter-TSS (NM_172571)	57	NM_172571	217335	Mm.35241	NM_172571	ENSMUSG00000020776	Fbf1	1110033G01Rik|5930413D20|mKIAA1863	Fas (TNFRSF6) binding factor 1	protein-coding
89.8425	0.0214765	0.332729	0.0645465	0.948535	0.997307	Cx3cr1WT-Cx3cr1KO	chr3	96593967	96594301	+	1000	promoter-TSS (NM_001293701)	promoter-TSS (NM_001293701)	47	NM_027241	69870	Mm.292739	NM_027241	ENSMUSG00000028104	Polr3gl	2010003I19Rik	polymerase (RNA) III (DNA directed) polypeptide G like	protein-coding
54.5052	0.238301	0.358842	0.664083	0.506637	0.940453	Cx3cr1WT-Cx3cr1KO	chr10	80755137	80755358	+	1000	promoter-TSS (NM_199322)	promoter-TSS (NM_199322)	44	NM_199322	208266	Mm.152371	NM_199322	ENSMUSG00000061589	Dot1l	A630076O07|AW907654|Dot1|KMT4|mDot1	DOT1-like, histone H3 methyltransferase (S. cerevisiae)	protein-coding
280.408	-0.0967213	0.245455	-0.394049	0.693545	0.977603	Cx3cr1WT-Cx3cr1KO	chr17	46153371	46153605	+	1000	promoter-TSS (NM_025649)	promoter-TSS (NM_025649)	63	NM_025649	66591	Mm.272024	NM_025649	ENSMUSG00000034509	Mad2l1bp	0610009D16Rik|2510031P20Rik|AU018945|AW550977|C76045|CMT2A|CMT2B|Mad2lbp|mKIAA0110	MAD2L1 binding protein	protein-coding
72.9915	0.237873	0.357768	0.664882	0.506126	0.940296	Cx3cr1WT-Cx3cr1KO	chr8	107056551	107056767	+	1000	promoter-TSS (NM_001164472)	promoter-TSS (NM_001164472)	78	NM_139229	97484	Mm.288641	NM_139229	ENSMUSG00000031916	Cog8	BB235941|C87832	component of oligomeric golgi complex 8	protein-coding
257.455	0.685144	0.263049	2.60462	0.00919752	0.33332	Cx3cr1WT-Cx3cr1KO	chr3	100685297	100685586	+	1000	promoter-TSS (NM_010763)	promoter-TSS (NM_010763)	32	NM_010763	17156	Mm.271617	NM_010763	ENSMUSG00000008763	Man1a2	AI428775|AI528764|AI854422|Man1b|PCR2	mannosidase, alpha, class 1A, member 2	protein-coding
102.986	-0.398307	0.331605	-1.20115	0.229694	0.854106	Cx3cr1WT-Cx3cr1KO	chr11	70615102	70615389	+	1000	promoter-TSS (NM_001145537)	promoter-TSS (NM_001145537)	-649	NM_001145537	668433	Mm.425687	NM_001145537	ENSMUSG00000087279	4930544D05Rik	-	RIKEN cDNA 4930544D05 gene	protein-coding
131.245	0.708162	0.312277	2.26774	0.0233452	0.457261	Cx3cr1WT-Cx3cr1KO	chr7	114414869	114415075	+	1000	promoter-TSS (NM_011055)	promoter-TSS (NM_011055)	189	NR_029437	71045	Mm.235682	NR_029437	ENSMUSG00000087475	4933406I18Rik	4933403D24Rik	RIKEN cDNA 4933406I18 gene	ncRNA
40.2563	0.438449	0.363393	1.20654	0.227608	NA	Cx3cr1WT-Cx3cr1KO	chr8	8690392	8690615	+	1000	promoter-TSS (NM_176849)	promoter-TSS (NM_176849)	34	NM_176849	234023	Mm.251655	NM_176849	ENSMUSG00000040459	Arglu1	9430010O03Rik|C130008N12	arginine and glutamate rich 1	protein-coding
202.642	-0.602781	0.289146	-2.08469	0.0370972	0.5246	Cx3cr1WT-Cx3cr1KO	chr11	120573379	120573613	+	1000	promoter-TSS (NM_011032)	promoter-TSS (NM_011032)	-243	NM_011032	18453	Mm.16660	NM_011032	ENSMUSG00000025130	P4hb	ERp59|PDI|Pdia1|Thbp	prolyl 4-hydroxylase, beta polypeptide	protein-coding
86.6787	0.846162	0.34212	2.47329	0.0133875	0.38475	Cx3cr1WT-Cx3cr1KO	chr11	94677276	94677490	+	1000	exon (NM_145828, exon 1 of 11)	exon (NM_145828, exon 1 of 11)	110	NM_145828	217119	Mm.100638	NM_145828	ENSMUSG00000020868	Xylt2	E030002B02Rik|XT-II|XT2|xylT-II	xylosyltransferase II	protein-coding
156.942	0.455051	0.289892	1.56973	0.116479	0.728043	Cx3cr1WT-Cx3cr1KO	chr7	28338582	28338854	+	1000	promoter-TSS (NM_013676)	promoter-TSS (NM_013676)	1	NM_013676	20924	Mm.285906	NM_013676	ENSMUSG00000003435	Supt5	AL033283|AL033321|AU019549|Spt5|Supt5h	suppressor of Ty 5	protein-coding
300.382	-0.133507	0.239546	-0.557332	0.577301	0.955217	Cx3cr1WT-Cx3cr1KO	chr9	108305809	108306054	+	1000	promoter-TSS (NM_001313961)	promoter-TSS (NM_001313961)	228	NM_133986	102791	Mm.24670	NM_133986	ENSMUSG00000039461	Tcta	9130410M22Rik|AW553637|C85065|Tctal	T cell leukemia translocation altered gene	protein-coding
51.6518	-0.0959285	0.360536	-0.266071	0.790184	0.987674	Cx3cr1WT-Cx3cr1KO	chr9	72531710	72531995	+	1000	promoter-TSS (NR_045735)	promoter-TSS (NR_045735)	6	NR_045735	75115	Mm.280755	NR_045735	ENSMUSG00000096986	4930509E16Rik	-	RIKEN cDNA 4930509E16 gene	ncRNA
54.7424	0.109537	0.359277	0.304882	0.760456	0.983463	Cx3cr1WT-Cx3cr1KO	chr18	65582026	65582369	+	1000	promoter-TSS (NM_001361053)	promoter-TSS (NM_001361053)	-221	NM_001361053	328977	Mm.286232	NM_207255	ENSMUSG00000042439	Zfp532	C530030I18Rik|Znf532|mKIAA1629	zinc finger protein 532	protein-coding
96.3407	-0.505606	0.335835	-1.50552	0.132191	0.753853	Cx3cr1WT-Cx3cr1KO	chr4	116220936	116221191	+	1000	promoter-TSS (NM_001355584)	promoter-TSS (NM_001355584)	-353	NM_001355585	18710	Mm.253819	NM_181585	ENSMUSG00000028698	Pik3r3	AA414954|p55|p55pik	phosphoinositide-3-kinase regulatory subunit 3	protein-coding
190.476	0.486231	0.284695	1.70791	0.0876539	0.669879	Cx3cr1WT-Cx3cr1KO	chr1	57969882	57970111	+	1000	promoter-TSS (NR_027630)	promoter-TSS (NR_027630)	88	NM_001159864	51960	Mm.339711	NM_030211	ENSMUSG00000054770	Kctd18	4932411A20Rik|6530404F10Rik	potassium channel tetramerisation domain containing 18	protein-coding
66.5977	-0.258789	0.350901	-0.737499	0.460819	0.931076	Cx3cr1WT-Cx3cr1KO	chr17	21450091	21450337	+	1000	promoter-TSS (NM_001308323)	promoter-TSS (NM_001308323)	-160	NM_001308323	22709	Mm.293030	NM_009558	ENSMUSG00000023892	Zfp51	Zfp-51|zfec12	zinc finger protein 51	protein-coding
73.9937	0.169866	0.344696	0.492801	0.622153	0.962501	Cx3cr1WT-Cx3cr1KO	chr8	22166011	22166264	+	1000	intron (NM_011848, intron 1 of 15)	intron (NM_011848, intron 1 of 15)	298	NM_011848	23954	Mm.41413	NM_011848	ENSMUSG00000031478	Nek3	-	NIMA (never in mitosis gene a)-related expressed kinase 3	protein-coding
38.517	-0.198035	0.363618	-0.544625	0.586011	NA	Cx3cr1WT-Cx3cr1KO	chr11	87853182	87853388	+	1000	promoter-TSS (NM_001039684)	promoter-TSS (NM_001039684)	60	NM_001039684	380718	Mm.24404	NM_001039684	ENSMUSG00000034121	Mks1	AK190930|B8d3|avc6	Meckel syndrome, type 1	protein-coding
444.2	0.288648	0.217433	1.32753	0.184334	0.820145	Cx3cr1WT-Cx3cr1KO	chr10	60277642	60277868	+	1000	exon (NM_001146120, exon 1 of 14)	exon (NM_001146120, exon 1 of 14)	127	NM_001146121	19156	Mm.29978	NM_011179	ENSMUSG00000004207	Psap	AI037048|SGP-1	prosaposin	protein-coding
89.2038	0.0863588	0.356598	0.242174	0.808645	0.98788	Cx3cr1WT-Cx3cr1KO	chr17	25773745	25773950	+	1000	promoter-TSS (NM_026238)	promoter-TSS (NM_026238)	71	NM_026238	67563	Mm.24201	NM_026238	ENSMUSG00000002280	Narfl	9030612I22Rik|AI504405|PRN	nuclear prelamin A recognition factor-like	protein-coding
88.2622	-0.2309	0.336884	-0.685401	0.493091	0.934389	Cx3cr1WT-Cx3cr1KO	chr17	25920276	25920543	+	1000	promoter-TSS (NM_139154)	promoter-TSS (NM_139154)	-695	NM_139154	224624	Mm.328872	NM_139154	ENSMUSG00000025730	Rab40c	RAR3	Rab40C, member RAS oncogene family	protein-coding
72.242	0.161895	0.361734	0.447552	0.654477	0.971379	Cx3cr1WT-Cx3cr1KO	chr12	69682173	69682471	+	1000	promoter-TSS (NM_001135559)	promoter-TSS (NM_001135559)	-470	NM_001135559	20663	Mm.3770	NM_001135559	ENSMUSG00000034801	Sos2	SOS-2|mSOS-2	SOS Ras/Rho guanine nucleotide exchange factor 2	protein-coding
98.4091	0.494408	0.330502	1.49593	0.134672	0.755776	Cx3cr1WT-Cx3cr1KO	chr4	45012162	45012434	+	1000	5' UTR (NM_001163284, exon 1 of 2)	5' UTR (NM_001163284, exon 1 of 2)	114	NM_001163284	230119	Mm.44222	NM_173399	ENSMUSG00000049657	Zbtb5	5930421I10|9430083K24Rik|AI646847|mKIAA0354	zinc finger and BTB domain containing 5	protein-coding
66.871	0.601602	0.35981	1.672	0.0945245	0.686261	Cx3cr1WT-Cx3cr1KO	chr6	54816546	54816774	+	1000	promoter-TSS (NM_199143)	promoter-TSS (NM_199143)	-256	NM_199143	387524	Mm.286149	NM_199143	ENSMUSG00000058446	Znrf2	1190002C14Rik|AU044205|D6Ertd365e	zinc and ring finger 2	protein-coding
66.6023	-0.0901991	0.359068	-0.251204	0.801657	0.98788	Cx3cr1WT-Cx3cr1KO	chr13	91223803	91224010	+	1000	promoter-TSS (NM_025770)	promoter-TSS (NM_025770)	81	NM_025770	66795	Mm.235385	NM_025770	ENSMUSG00000021619	Atg10	5330424L23Rik|5430428K15Rik|AI852123|APG10|Agp10|Apg10l|Apg10p|Atg10l	autophagy related 10	protein-coding
185.375	-0.387183	0.308327	-1.25575	0.209205	0.84675	Cx3cr1WT-Cx3cr1KO	chr3	105959035	105959328	+	1000	promoter-TSS (NM_027432)	promoter-TSS (NM_027432)	-317	NM_027432	70465	Mm.5110	NM_027432	ENSMUSG00000000561	Wdr77	2610003I18Rik|2610312E17Rik|C79984|p44/MEP50	WD repeat domain 77	protein-coding
237.271	0.0403594	0.253274	0.159351	0.873392	0.993944	Cx3cr1WT-Cx3cr1KO	chr5	21056204	21056447	+	1000	promoter-TSS (NM_001356591)	promoter-TSS (NM_001356591)	-414	NM_011203	19248	Mm.319117	NM_011203	ENSMUSG00000028771	Ptpn12	P19-PTP|PTP-P19|PTP-PEST|PTPG1	protein tyrosine phosphatase, non-receptor type 12	protein-coding
62.74	0.0323803	0.354211	0.0914154	0.927162	0.994985	Cx3cr1WT-Cx3cr1KO	chr7	116093249	116093501	+	1000	promoter-TSS (NM_019772)	promoter-TSS (NM_019772)	-5	NM_019772	56372	Mm.24231	NM_019772	ENSMUSG00000030663	1110004F10Rik	Smacp|Smap|sid2057|sid2057p	RIKEN cDNA 1110004F10 gene	protein-coding
60.5592	-0.121882	0.36352	-0.335283	0.737412	0.98239	Cx3cr1WT-Cx3cr1KO	chr7	45488635	45488845	+	1000	promoter-TSS (NM_027903)	promoter-TSS (NM_027903)	65	NM_027903	71755	Mm.34208	NM_027903	ENSMUSG00000011382	Dhdh	1300018L09Rik|AA591799|B830008H07Rik|Xld-1|Xld1	dihydrodiol dehydrogenase (dimeric)	protein-coding
132.516	-0.245411	0.32775	-0.748775	0.453993	0.930724	Cx3cr1WT-Cx3cr1KO	chr2	152226633	152226863	+	1000	promoter-TSS (NM_007788)	promoter-TSS (NM_007788)	-92	NM_007788	12995	Mm.23692	NM_007788	ENSMUSG00000074698	Csnk2a1	CK2|Csnk2a1-rs4	casein kinase 2, alpha 1 polypeptide	protein-coding
112.686	0.0286589	0.320309	0.0894725	0.928706	0.994985	Cx3cr1WT-Cx3cr1KO	chr9	21149746	21149996	+	1000	promoter-TSS (NM_016742)	promoter-TSS (NM_016742)	35	NM_016742	12539	Mm.32331	NM_016742	ENSMUSG00000019471	Cdc37	p50|p50Cdc37	cell division cycle 37	protein-coding
79.6505	-0.0474996	0.348262	-0.13639	0.891513	0.993944	Cx3cr1WT-Cx3cr1KO	chr16	33830107	33830426	+	1000	intron (NM_001145884, intron 1 of 14)	CpG	601	NM_001145884	16419	Mm.6424	NM_010580	ENSMUSG00000022817	Itgb5	AA475909|AI874634|ESTM23|[b]-5|[b]5|[b]5A|[b]5B|beta-5|beta5	integrin beta 5	protein-coding
163.604	0.80227	0.301007	2.66529	0.0076923	0.304779	Cx3cr1WT-Cx3cr1KO	chr4	15265696	15265956	+	1000	promoter-TSS (NM_181401)	promoter-TSS (NM_181401)	6	NM_181401	100201	Mm.394111	NM_181401	ENSMUSG00000043252	Tmem64	9630015D15Rik|AI790744|AV300874	transmembrane protein 64	protein-coding
104.472	-0.326495	0.324457	-1.00628	0.31428	0.895746	Cx3cr1WT-Cx3cr1KO	chr2	118728308	118728682	+	1000	promoter-TSS (NM_001290790)	promoter-TSS (NM_001290790)	-57	NM_001290790	18796	Mm.215156	NM_177568	ENSMUSG00000040061	Plcb2	AI550384|B230205M18Rik|B230399N12	phospholipase C, beta 2	protein-coding
54.8339	0.261041	0.360569	0.723969	0.469085	0.931076	Cx3cr1WT-Cx3cr1KO	chr15	80078477	80078781	+	1000	promoter-TSS (NR_028282)	promoter-TSS (NR_028282)	-50	NR_028282	100302601		NR_028282	ENSMUSG00000077734	Snord83b	MBII-10	small nucleolar RNA, C/D box 83B	snoRNA
124.994	-0.212157	0.334379	-0.634481	0.525767	0.947185	Cx3cr1WT-Cx3cr1KO	chr2	18064627	18064825	+	1000	non-coding (NR_045539, exon 1 of 25)	non-coding (NR_045539, exon 1 of 25)	141	NM_001252561	17354	Mm.209175	NM_010804	ENSMUSG00000026743	Mllt10	Af10|B130021D15Rik|D630001B22Rik|mKIAA4140	myeloid/lymphoid or mixed-lineage leukemia; translocated to, 10	protein-coding
54.0312	0.0923126	0.358651	0.257388	0.796879	0.98788	Cx3cr1WT-Cx3cr1KO	chr3	86999068	86999268	+	1000	intron (NM_007639, intron 1 of 5)	intron (NM_007639, intron 1 of 5)	172	NM_007639	12479	Mm.1894	NM_007639	ENSMUSG00000028076	Cd1d1	AI747460|CD1.1|Cd1a|Cd1d|Ly-38	CD1d1 antigen	protein-coding
273.8	-0.096847	0.242322	-0.399663	0.689405	0.977385	Cx3cr1WT-Cx3cr1KO	chr7	19227845	19228110	+	1000	promoter-TSS (NM_207525)	promoter-TSS (NM_207525)	-412	NM_207525	403187	Mm.239583	NM_207525	ENSMUSG00000052214	Opa3	D630048P19Rik|Gm1425|Gm472	optic atrophy 3	protein-coding
42.4636	-0.580444	0.361781	-1.60441	0.108624	NA	Cx3cr1WT-Cx3cr1KO	chr1	59763994	59764245	+	1000	promoter-TSS (NM_007561)	promoter-TSS (NM_007561)	-160	NM_007561	12168	Mm.7106	NM_007561	ENSMUSG00000067336	Bmpr2	2610024H22Rik|AL117858|AW546137|BB189135|BMP-2|BMPR-2|BMPR-II|BMPRII|BRK-3|Gm20272	bone morphogenetic protein receptor, type II (serine/threonine kinase)	protein-coding
42.1862	-0.084719	0.363613	-0.232992	0.815767	NA	Cx3cr1WT-Cx3cr1KO	chr11	87109166	87109375	+	1000	promoter-TSS (NM_175563)	promoter-TSS (NM_175563)	9	NM_025377	66140	Mm.45008	NM_025377	ENSMUSG00000020492	Ska2	1110001A07Rik|C78640|Fam33a	spindle and kinetochore associated complex subunit 2	protein-coding
247.029	-0.138638	0.25815	-0.537045	0.591236	0.958203	Cx3cr1WT-Cx3cr1KO	chr13	55321900	55322162	+	1000	promoter-TSS (NM_025596)	promoter-TSS (NM_025596)	-24	NM_025596	66494	Mm.439805	NM_025596	ENSMUSG00000021486	Prelid1	2610524G07Rik|Preli	PRELI domain containing 1	protein-coding
108.635	0.3124	0.3301	0.946379	0.343955	0.902562	Cx3cr1WT-Cx3cr1KO	chr9	44320100	44320309	+	1000	promoter-TSS (NM_027909)	promoter-TSS (NM_027909)	78	NM_001359259	71764	Mm.491174	NM_027909	ENSMUSG00000032120	C2cd2l	1300006O23Rik|Tmem24	C2 calcium-dependent domain containing 2-like	protein-coding
182.246	0.668466	0.314516	2.12538	0.0335547	0.506236	Cx3cr1WT-Cx3cr1KO	chr2	30416005	30416208	+	1000	promoter-TSS (NM_007760)	promoter-TSS (NM_007760)	56	NM_138748	110854	Mm.275393	NM_138748	ENSMUSG00000039515	Ptpa	2610042B21Rik|C77440|N28142|PR53|Ppp2r4	protein phosphatase 2 protein activator	protein-coding
215.19	0.42969	0.263469	1.63089	0.102913	0.705177	Cx3cr1WT-Cx3cr1KO	chr4	149307568	149307838	+	1000	promoter-TSS (NM_001290995)	promoter-TSS (NM_001290995)	-5	NM_008441	16561	Mm.402393	NM_008441	ENSMUSG00000063077	Kif1b	A530096N05Rik|AI448212|AI506502|D4Mil1e|KIF1Bp130|KIF1Bp204	kinesin family member 1B	protein-coding
316.948	0.258698	0.273039	0.947477	0.343396	0.902562	Cx3cr1WT-Cx3cr1KO	chr2	156180422	156180752	+	1000	promoter-TSS (NM_001291114)	promoter-TSS (NM_001291114)	-349	NM_133242	170791	Mm.392436	NM_133242	ENSMUSG00000027620	Rbm39	1500012C14Rik|2310040E03Rik|B330012G18Rik|C79248|R75070|Rnpc2|caper	RNA binding motif protein 39	protein-coding
229.008	0.0293865	0.269772	0.108931	0.913257	0.993944	Cx3cr1WT-Cx3cr1KO	chr6	125096114	125096319	+	1000	promoter-TSS (NM_145979)	promoter-TSS (NM_145979)	53	NM_145979	107932	Mm.333388	NM_145979	ENSMUSG00000063870	Chd4	9530019N15Rik|AA617397|BC005710|D6Ertd380e|Mi-2beta|mKIAA4075	chromodomain helicase DNA binding protein 4	protein-coding
346.315	-0.0549403	0.226824	-0.242216	0.808613	0.98788	Cx3cr1WT-Cx3cr1KO	chr8	11555991	11556225	+	1000	promoter-TSS (NM_011919)	promoter-TSS (NM_011919)	43	NM_001302460	26356	Mm.25709	NM_011919	ENSMUSG00000045969	Ing1	2610028J21Rik|AA407184|AI875420|mING1h|p33Ing1|p37Ing1b	inhibitor of growth family, member 1	protein-coding
69.3051	0.0642503	0.348025	0.184614	0.853532	0.993413	Cx3cr1WT-Cx3cr1KO	chr8	84257141	84257509	+	1000	promoter-TSS (NM_026423)	promoter-TSS (NM_026423)	-1	NM_026423	67873	Mm.278085	NM_026423	ENSMUSG00000004996	Mri1	2410018C20Rik	methylthioribose-1-phosphate isomerase 1	protein-coding
103.48	-0.509425	0.339324	-1.50129	0.13328	0.755776	Cx3cr1WT-Cx3cr1KO	chr4	155847096	155847341	+	1000	promoter-TSS (NM_010091)	promoter-TSS (NM_010091)	-184	NM_010091	13542	Mm.3400	NM_010091	ENSMUSG00000029071	Dvl1	Dvl|mKIAA4029	dishevelled segment polarity protein 1	protein-coding
100.193	-0.14657	0.328128	-0.446686	0.655102	0.971379	Cx3cr1WT-Cx3cr1KO	chr2	28641146	28641393	+	1000	promoter-TSS (NM_022887)	promoter-TSS (NM_022887)	36	NM_022887	64930	Mm.224354	NM_022887	ENSMUSG00000026812	Tsc1	-	tuberous sclerosis 1	protein-coding
130.311	0.259005	0.30742	0.842514	0.3995	0.914739	Cx3cr1WT-Cx3cr1KO	chr5	45520228	45520468	+	1000	exon (NM_025895, exon 1 of 4)	exon (NM_025895, exon 1 of 4)	119	NM_025895	66999	Mm.283045	NM_025895	ENSMUSG00000015804	Med28	1500003D12Rik|AI451633|AU045690|Eg1|FKSG20|magicin	mediator complex subunit 28	protein-coding
106.626	0.0116931	0.336043	0.0347963	0.972242	0.998197	Cx3cr1WT-Cx3cr1KO	chrX	56455697	56455914	+	1000	intron (NM_172779, intron 2 of 16)	CpG-15696	966	NM_172779	236790	Mm.474772	NM_172779	ENSMUSG00000035967	Ints6l	4930535D10Rik|6330505F04Rik|D130066O12|Ddx26b	integrator complex subunit 6 like	protein-coding
28.6583	0.145441	0.359799	0.404228	0.686045	NA	Cx3cr1WT-Cx3cr1KO	chr3	87768734	87768984	+	1000	promoter-TSS (NM_001289601)	promoter-TSS (NM_001289601)	94	NM_001289600	73182	Mm.158962	NM_028460	ENSMUSG00000028073	Pear1	3110045G13Rik|Jedi-1|Megf12	platelet endothelial aggregation receptor 1	protein-coding
81.0833	-0.0512091	0.348955	-0.14675	0.883329	0.993944	Cx3cr1WT-Cx3cr1KO	chr18	80151380	80151642	+	1000	promoter-TSS (NM_175028)	promoter-TSS (NM_175028)	-29	NM_175028	240442	Mm.26594	NM_175028	ENSMUSG00000053950	Adnp2	8430420L05Rik|BC024969|Kiaa0863|Zfp508|mKIAA0863	ADNP homeobox 2	protein-coding
76.3093	-0.503066	0.351522	-1.43111	0.1524	0.784786	Cx3cr1WT-Cx3cr1KO	chr12	59219391	59219590	+	1000	promoter-TSS (NM_001033156)	promoter-TSS (NM_001033156)	-7	NM_001033156	70611	Mm.311026	NM_001033156	ENSMUSG00000035329	Fbxo33	5730501N20Rik|AI642135	F-box protein 33	protein-coding
182.231	0.691014	0.284475	2.42909	0.015137	0.397261	Cx3cr1WT-Cx3cr1KO	chr8	84832192	84832458	+	1000	promoter-TSS (NR_033145)	promoter-TSS (NR_033145)	43	NM_183358	102060	Mm.489649	NM_183358	ENSMUSG00000033751	Gadd45gip1	2310040G17Rik|AI425883|Crif1|MRP-L59|Plinp1	growth arrest and DNA-damage-inducible, gamma interacting protein 1	protein-coding
162.74	0.0380691	0.306193	0.12433	0.901054	0.993944	Cx3cr1WT-Cx3cr1KO	chr15	37960876	37961135	+	1000	promoter-TSS (NM_199476)	promoter-TSS (NM_199476)	50	NM_199476	382985	Mm.24738	NM_199476	ENSMUSG00000022292	Rrm2b	p53R2	ribonucleotide reductase M2 B (TP53 inducible)	protein-coding
117.586	0.537658	0.316732	1.69752	0.0895989	0.674023	Cx3cr1WT-Cx3cr1KO	chrX	20703787	20704072	+	1000	promoter-TSS (NM_145628)	promoter-TSS (NM_145628)	20	NM_145628	236733	Mm.34489	NM_145628	ENSMUSG00000031066	Usp11	6230415D12Rik|mKIAA4085	ubiquitin specific peptidase 11	protein-coding
80.4911	-0.0101376	0.35287	-0.028729	0.977081	0.998197	Cx3cr1WT-Cx3cr1KO	chr16	48993917	48994194	+	1000	promoter-TSS (NM_001356425)	promoter-TSS (NM_001356425)	57	NM_027341	224170	Mm.275138	NM_027341	ENSMUSG00000064061	Dzip3	2310047C04Rik|2A-HUB|6430549P11Rik|A230104G20	DAZ interacting protein 3, zinc finger	protein-coding
58.8632	0.0327789	0.363586	0.0901545	0.928164	0.994985	Cx3cr1WT-Cx3cr1KO	chr2	126934047	126934339	+	1000	promoter-TSS (NM_023220)	promoter-TSS (NM_023220)	-958	NM_023220	66552	Mm.269928	NM_023220	ENSMUSG00000027366	Sppl2a	2010106G01Rik|C130089K23Rik	signal peptide peptidase like 2A	protein-coding
59.8745	0.520992	0.357099	1.45896	0.144577	0.773794	Cx3cr1WT-Cx3cr1KO	chr13	107889133	107889486	+	1000	intron (NM_145456, intron 2 of 14)	CpG	755	NM_145456	67263	Mm.490418	NM_145456		Zswim6	2900036G02Rik|mKIAA1577	zinc finger SWIM-type containing 6	protein-coding
18.3505	-1.01196	0.331151	-3.05589	0.00224397	NA	Cx3cr1WT-Cx3cr1KO	chr6	83053419	83053636	+	1000	promoter-TSS (NM_007517)	promoter-TSS (NM_007517)	-994	NM_007517	11993	Mm.386752	NM_007517	ENSMUSG00000068328	Aup1	AA589454	ancient ubiquitous protein 1	protein-coding
242.716	-0.179755	0.277324	-0.648177	0.516871	0.946105	Cx3cr1WT-Cx3cr1KO	chr5	135778563	135778796	+	1000	promoter-TSS (NM_008617)	promoter-TSS (NM_008617)	30	NM_008617	17448	Mm.297096	NM_008617	ENSMUSG00000019179	Mdh2	MDH|Mdh-2|Mor-1|Mor1	malate dehydrogenase 2, NAD (mitochondrial)	protein-coding
263.695	-0.507031	0.273344	-1.85492	0.063608	0.611506	Cx3cr1WT-Cx3cr1KO	chr6	113378090	113378323	+	1000	promoter-TSS (NM_133932)	promoter-TSS (NM_133932)	93	NM_001170486	68089	Mm.289306	NM_026552	ENSMUSG00000079426	Arpc4	20kDa|5330419I20Rik|AI327076|p20-Arc	actin related protein 2/3 complex, subunit 4	protein-coding
219.348	-0.0700683	0.287482	-0.243732	0.807439	0.98788	Cx3cr1WT-Cx3cr1KO	chr14	78732760	78733067	+	1000	promoter-TSS (NM_001081336)	promoter-TSS (NM_001081336)	-184	NM_001081336	380921	Mm.89591	NM_001081336	ENSMUSG00000034731	Dgkh	5930402B05Rik|D130015C16|DGK	diacylglycerol kinase, eta	protein-coding
81.3257	-0.306181	0.342569	-0.89378	0.37144	0.909567	Cx3cr1WT-Cx3cr1KO	chr2	120352962	120353203	+	1000	promoter-TSS (NR_027618)	promoter-TSS (NR_027618)	51	NR_027618	269338	Mm.246131	NM_147153	ENSMUSG00000027291	Vps39	A230065P22Rik|AW743070|Vam6|Vam6P|mVam6	VPS39 HOPS complex subunit	protein-coding
156.385	0.982073	0.309175	3.17643	0.00149099	0.178455	Cx3cr1WT-Cx3cr1KO	chr5	110770443	110770674	+	1000	promoter-TSS (NR_152254)	promoter-TSS (NR_152254)	159	NM_029337	75560	Mm.270487	NM_029337	ENSMUSG00000029505	Ep400	1700020J09Rik|AU023439|mDomino|mKIAA1498|p400	E1A binding protein p400	protein-coding
219.738	0.233184	0.260818	0.89405	0.371295	0.909567	Cx3cr1WT-Cx3cr1KO	chr3	54735041	54735316	+	1000	promoter-TSS (NM_025442)	promoter-TSS (NM_025442)	186	NM_027148	69639	Mm.29253	NM_027148	ENSMUSG00000027752	Exosc8	2310032N20Rik|CIP3|mKIAA4013	exosome component 8	protein-coding
49.5072	-0.319918	0.36304	-0.88122	0.378199	0.912464	Cx3cr1WT-Cx3cr1KO	chr8	11476932	11477249	+	1000	promoter-TSS (NR_126558)	promoter-TSS (NR_126558)	-839	NR_126558	102132	Mm.37632	NR_126558	ENSMUSG00000096957	E230013L22Rik	AI645545	RIKEN cDNA E230013L22 gene	ncRNA
109.169	0.192925	0.319291	0.604227	0.545693	0.949794	Cx3cr1WT-Cx3cr1KO	chr4	138434624	138434859	+	1000	promoter-TSS (NM_026689)	promoter-TSS (NM_026689)	69	NM_026689	68350	Mm.103413	NM_026689	ENSMUSG00000041241	Mul1	0610009K11Rik|AV000801|Gide	mitochondrial ubiquitin ligase activator of NFKB 1	protein-coding
244.347	0.529437	0.256428	2.06466	0.0389552	0.52992	Cx3cr1WT-Cx3cr1KO	chr10	7680945	7681255	+	1000	promoter-TSS (NR_033219)	promoter-TSS (NR_033219)	35	NM_001358649	18537	Mm.258431	NM_008786	ENSMUSG00000019795	Pcmt1	C79501|PIMT	protein-L-isoaspartate (D-aspartate) O-methyltransferase 1	protein-coding
267.041	-0.0734712	0.273199	-0.268929	0.787984	0.987403	Cx3cr1WT-Cx3cr1KO	chr17	33685265	33685507	+	1000	promoter-TSS (NM_029804)	promoter-TSS (NM_029804)	72	NM_001109913	76936	Mm.311439	NM_029804	ENSMUSG00000059208	Hnrnpm	2610023M21Rik|AA409009|Hnrpm|mKIAA4193	heterogeneous nuclear ribonucleoprotein M	protein-coding
162.783	-0.247499	0.289924	-0.853668	0.393289	0.914739	Cx3cr1WT-Cx3cr1KO	chr1	178318881	178319116	+	1000	promoter-TSS (NM_025511)	promoter-TSS (NM_025511)	-155	NM_025511	66359	Mm.489720	NM_025511	ENSMUSG00000026500	Cox20	2310005N03Rik|Fam36a	COX20 Cox2 chaperone	protein-coding
78.4526	-0.31858	0.359419	-0.886374	0.375416	0.912157	Cx3cr1WT-Cx3cr1KO	chr13	53377169	53377432	+	1000	promoter-TSS (NM_009269)	promoter-TSS (NM_009269)	61	NM_009269	268656	Mm.240336	NM_009269	ENSMUSG00000021468	Sptlc1	AW552086|C77762|E030036H05|Lcb1|SPT1	serine palmitoyltransferase, long chain base subunit 1	protein-coding
231.262	-0.089164	0.271841	-0.328001	0.742911	0.98239	Cx3cr1WT-Cx3cr1KO	chr17	75465356	75465612	+	1000	promoter-TSS (NM_207246)	promoter-TSS (NM_207246)	-54	NM_001360103	240168	Mm.329203	NM_207246	ENSMUSG00000071042	Rasgrp3	BC066069|Gm327	RAS, guanyl releasing protein 3	protein-coding
64.339	0.0459771	0.356862	0.128837	0.897486	0.993944	Cx3cr1WT-Cx3cr1KO	chr11	95384846	95385058	+	1000	promoter-TSS (NM_001357797)	promoter-TSS (NM_001357797)	96	NM_001357797	110172	Mm.4593	NM_016752	ENSMUSG00000020873	Slc35b1	UGTrel1|Ugalt2	solute carrier family 35, member B1	protein-coding
145.074	-0.155954	0.302818	-0.515011	0.606545	0.958743	Cx3cr1WT-Cx3cr1KO	chr1	171840526	171840752	+	1000	5' UTR (NM_001252472, exon 2 of 3)	5' UTR (NM_001252472, exon 2 of 3)	942	NM_013489	12523	Mm.259115	NM_013489	ENSMUSG00000038147	Cd84	A130013D22Rik|CDw84|SLAMF5	CD84 antigen	protein-coding
61.2427	-0.253828	0.362891	-0.69946	0.484264	0.931076	Cx3cr1WT-Cx3cr1KO	chr7	12818693	12818962	+	1000	promoter-TSS (NM_026046)	promoter-TSS (NM_026046)	33	NM_026046	67230	Mm.333574	NM_026046	ENSMUSG00000057894	Zfp329	2810439M05Rik|4632409L22Rik|ZNF329	zinc finger protein 329	protein-coding
285.359	-0.406434	0.293691	-1.38388	0.166394	0.806457	Cx3cr1WT-Cx3cr1KO	chr15	80798523	80798735	+	1000	promoter-TSS (NM_177124)	promoter-TSS (NM_177124)	19	NM_177124	213988	Mm.131328	NM_144812	ENSMUSG00000047888	Tnrc6b	2700090M07Rik|A730065C02Rik|AI848765|D230019K20Rik	trinucleotide repeat containing 6b	protein-coding
86.5009	0.554159	0.335396	1.65225	0.0984836	0.700805	Cx3cr1WT-Cx3cr1KO	chr13	112660691	112660969	+	1000	promoter-TSS (NM_178746)	promoter-TSS (NM_178746)	64	NM_178746	268706	Mm.40834	NM_175376	ENSMUSG00000047789	Slc38a9	4833412L08Rik|6720411P22Rik|9130023D20Rik|9430067K09Rik|A730092C09	solute carrier family 38, member 9	protein-coding
379.388	0.00566627	0.219544	0.0258093	0.979409	0.998197	Cx3cr1WT-Cx3cr1KO	chr4	86857222	86857510	+	1000	promoter-TSS (NM_009096)	promoter-TSS (NM_009096)	1	NM_009096	20104	Mm.379007	NM_009096	ENSMUSG00000028495	Rps6	S6R	ribosomal protein S6	protein-coding
247.368	-0.0432165	0.258502	-0.16718	0.867228	0.993944	Cx3cr1WT-Cx3cr1KO	chr6	34877844	34878085	+	1000	5' UTR (NM_001347101, exon 1 of 4)	5' UTR (NM_001347101, exon 1 of 4)	101	NM_199145	78412	Mm.248440	NM_199145	ENSMUSG00000046806	3110062M04Rik	AL023049|Cyren|Mri	RIKEN cDNA 3110062M04 gene	protein-coding
119.694	-0.303168	0.319645	-0.948454	0.342898	0.902562	Cx3cr1WT-Cx3cr1KO	chr10	81605939	81606166	+	1000	promoter-TSS (NR_030677)	promoter-TSS (NR_030677)	-256	NR_030677	268319	Mm.131825	NM_001033363	ENSMUSG00000074862	BC025920	-	zinc finger protein pseudogene	pseudo
118.184	0.0399755	0.33753	0.118435	0.905723	0.993944	Cx3cr1WT-Cx3cr1KO	chr1	170175100	170175335	+	1000	promoter-TSS (NM_001305045)	promoter-TSS (NM_001305045)	-253	NM_001305045	107652	Mm.27969	NM_133806	ENSMUSG00000026670	Uap1	AA420407|AA437972|AGX-1|AGX-2|AGX1|AgX|ESTM38|SPAG2	UDP-N-acetylglucosamine pyrophosphorylase 1	protein-coding
286.077	0.21025	0.263541	0.797788	0.424993	0.919373	Cx3cr1WT-Cx3cr1KO	chr9	66945765	66946000	+	1000	promoter-TSS (NM_001311101)	promoter-TSS (NM_001311101)	-204	NM_001311101	67941	Mm.30120	NM_026467	ENSMUSG00000036781	Rps27l	1810034D23Rik	ribosomal protein S27-like	protein-coding
283.264	0.244577	0.25981	0.941368	0.346516	0.902562	Cx3cr1WT-Cx3cr1KO	chr11	96065222	96065614	+	1000	promoter-TSS (NM_172300)	promoter-TSS (NM_172300)	-54	NM_172300	268470	Mm.38802	NM_172300	ENSMUSG00000014349	Ube2z	AW049199|C030047H17Rik|D11Moh35	ubiquitin-conjugating enzyme E2Z	protein-coding
38.4191	-0.70307	0.362268	-1.94074	0.0522894	NA	Cx3cr1WT-Cx3cr1KO	chr2	148874658	148874948	+	1000	intron (NM_009976, intron 1 of 2)	intron (NM_009976, intron 1 of 2)	709	NM_009976	13010	Mm.4263	NM_009976	ENSMUSG00000027447	Cst3	CysC	cystatin C	protein-coding
69.6441	-0.100035	0.350069	-0.285757	0.775064	0.985237	Cx3cr1WT-Cx3cr1KO	chr1	75168558	75168989	+	1000	promoter-TSS (NM_026846)	promoter-TSS (NM_026846)	38	NM_026846	68818	Mm.32646	NM_026846	ENSMUSG00000026197	Zfand2b	1110060O18Rik|C81256	zinc finger, AN1 type domain 2B	protein-coding
48.8807	0.190717	0.361481	0.527598	0.597778	0.958371	Cx3cr1WT-Cx3cr1KO	chr5	34636479	34636801	+	1000	exon (NM_001356979, exon 2 of 13)	exon (NM_001356979, exon 2 of 13)	572	NM_001356978	68294	Mm.34564	NM_026660	ENSMUSG00000001082	Mfsd10	0610009O03Rik|Tetran	major facilitator superfamily domain containing 10	protein-coding
89.7871	-0.352061	0.333671	-1.05511	0.291374	0.886146	Cx3cr1WT-Cx3cr1KO	chr11	3931966	3932280	+	1000	promoter-TSS (NM_015749)	promoter-TSS (NM_015749)	-45	NM_001130458	21452	Mm.20948	NM_015749	ENSMUSG00000020432	Tcn2	AW208754|Tcn-2	transcobalamin 2	protein-coding
160.964	-0.0293281	0.288826	-0.101542	0.91912	0.994163	Cx3cr1WT-Cx3cr1KO	chr12	69582837	69583198	+	1000	promoter-TSS (NM_001033236)	promoter-TSS (NM_001033236)	11	NM_001033236	207965	Mm.102487	NM_001033236	ENSMUSG00000049882	Vcpkmt	Gm71|Mettl21d|Mettl221d|VCP-KMT	valosin containing protein lysine (K) methyltransferase	protein-coding
60.7093	0.11049	0.35893	0.307831	0.758211	0.983463	Cx3cr1WT-Cx3cr1KO	chr6	119478974	119479294	+	1000	promoter-TSS (NM_133940)	promoter-TSS (NM_133940)	-534	NM_133940	101358	Mm.125477	NM_133940	ENSMUSG00000030019	Fbxl14	AW322056|Fbx14l	F-box and leucine-rich repeat protein 14	protein-coding
84.559	-0.0527567	0.361934	-0.145763	0.884108	0.993944	Cx3cr1WT-Cx3cr1KO	chr1	45795372	45795656	+	1000	5' UTR (NM_028599, exon 1 of 21)	5' UTR (NM_028599, exon 1 of 21)	348	NM_028599	73674	Mm.270376	NM_028599	ENSMUSG00000025995	Wdr75	1300003A18Rik|2410118I19Rik|C77608	WD repeat domain 75	protein-coding
793.545	0.217055	0.171138	1.26831	0.204688	0.839953	Cx3cr1WT-Cx3cr1KO	chr12	91589807	91590030	+	1000	promoter-TSS (NM_031391)	promoter-TSS (NM_031391)	-269	NM_031391	83602	Mm.275728	NM_031391	ENSMUSG00000020962	Gtf2a1	6330549H03Rik|AA536742|AA959775|AW060250|TfIIAa/b|Tfiia1	general transcription factor II A, 1	protein-coding
77.0747	0.0680528	0.342869	0.198481	0.842669	0.992763	Cx3cr1WT-Cx3cr1KO	chr19	5568045	5568257	+	1000	5' UTR (NM_001033448, exon 1 of 2)	5' UTR (NM_001033448, exon 1 of 2)	127	NM_001033448	381201	Mm.441906	NM_001033448	ENSMUSG00000049562	Ap5b1	Gm962|beta-5	adaptor-related protein complex 5, beta 1 subunit	protein-coding
48.0551	0.153275	0.362523	0.4228	0.672441	0.9758	Cx3cr1WT-Cx3cr1KO	chr11	98149491	98149688	+	1000	promoter-TSS (NM_028149)	promoter-TSS (NM_028149)	27	NM_028149	72194	Mm.218350	NM_028149	ENSMUSG00000020883	Fbxl20	2610511F20Rik|4632423N09Rik|AI849362|AL117906|C86145|Fbl2|Scr|mKIAA4147	F-box and leucine-rich repeat protein 20	protein-coding
94.1264	-0.0353606	0.331721	-0.106597	0.915108	0.993944	Cx3cr1WT-Cx3cr1KO	chr9	64340358	64340711	+	1000	promoter-TSS (NM_172519)	promoter-TSS (NM_172519)	-77	NM_172519	213550	Mm.268341	NM_172519	ENSMUSG00000032396	Dis3l	AV340375	DIS3 like exosome 3'-5' exoribonuclease	protein-coding
28.3158	-0.0878409	0.358059	-0.245326	0.806204	NA	Cx3cr1WT-Cx3cr1KO	chr11	98400215	98400521	+	1000	exon (NM_001033537, exon 1 of 8)	exon (NM_001033537, exon 1 of 8)	122	NM_001033537	320655	Mm.86519	NM_001033537	ENSMUSG00000038208	Pgap3	CAB2|D430035D22Rik|Perld1	post-GPI attachment to proteins 3	protein-coding
90.5876	0.396156	0.344687	1.14932	0.250423	0.860364	Cx3cr1WT-Cx3cr1KO	chr7	143685676	143685967	+	1000	promoter-TSS (NM_024290)	promoter-TSS (NM_024290)	54	NM_001308111	79201	Mm.290780	NM_024290	ENSMUSG00000037613	Tnfrsf23	SOB|TNFRSFH23|Tnfrh1|Tnfrsf1al1|mDcTRAILR1|mSOB	tumor necrosis factor receptor superfamily, member 23	protein-coding
1052.39	0.0376959	0.145433	0.259198	0.795483	0.98788	Cx3cr1WT-Cx3cr1KO	chr1	144003998	144004209	+	1000	promoter-TSS (NM_009061)	promoter-TSS (NM_009061)	46	NM_009061	19735	Mm.28262	NM_009061	ENSMUSG00000026360	Rgs2	GOS8	regulator of G-protein signaling 2	protein-coding
119.288	0.0753844	0.31193	0.241671	0.809035	0.98788	Cx3cr1WT-Cx3cr1KO	chr8	106893521	106893808	+	1000	promoter-TSS (NM_011574)	promoter-TSS (NM_011574)	24	NM_001358982	21771	Mm.10665	NM_011574	ENSMUSG00000041438	Utp4	Cirh1a|Cirhin|Naic|Teg-292|Tex292	UTP4 small subunit processome component	protein-coding
59.9223	-0.188906	0.358863	-0.526401	0.59861	0.958557	Cx3cr1WT-Cx3cr1KO	chr8	88137820	88138052	+	1000	promoter-TSS (NR_106039)	promoter-TSS (NR_106039)	51	NM_172757	234549	Mm.36291	NM_172757	ENSMUSG00000031657	Heatr3	C030036P15Rik	HEAT repeat containing 3	protein-coding
178.08	0.409444	0.307567	1.33123	0.183112	0.820145	Cx3cr1WT-Cx3cr1KO	chr11	61761939	61762150	+	1000	promoter-TSS (NM_001164242)	promoter-TSS (NM_001164242)	44	NM_144806	212627	Mm.27703	NM_144806	ENSMUSG00000020528	Prpsap2	A230054F23Rik	phosphoribosyl pyrophosphate synthetase-associated protein 2	protein-coding
97.385	1.01406	0.32902	3.08205	0.00205578	0.192865	Cx3cr1WT-Cx3cr1KO	chr13	91460435	91460825	+	1000	promoter-TSS (NM_024186)	promoter-TSS (NM_024186)	-467	NM_024272	66970	Mm.343095	NM_024186	ENSMUSG00000003992	Ssbp2	1500004K09Rik|2310079I02Rik|9330163K02Rik|A830008M03Rik|AU067692|AW558684|Hspc116|SSDP2	single-stranded DNA binding protein 2	protein-coding
76.2397	0.520927	0.352903	1.47612	0.139912	0.769886	Cx3cr1WT-Cx3cr1KO	chr2	163602123	163602505	+	1000	promoter-TSS (NM_181734)	promoter-TSS (NM_181734)	0	NM_181734	76080	Mm.89828	NM_029512	ENSMUSG00000017679	Ttpal	3110080A02Rik|5830472M02Rik	tocopherol (alpha) transfer protein-like	protein-coding
65.255	0.0120035	0.355033	0.0338096	0.973029	0.998197	Cx3cr1WT-Cx3cr1KO	chr16	10545340	10545540	+	1000	5' UTR (NM_001204229, exon 1 of 23)	5' UTR (NM_001204229, exon 1 of 23)	101	NM_001204229	74374	Mm.159176	NM_177562	ENSMUSG00000068663	Clec16a	4932416N17Rik|curt|mKIAA0350	C-type lectin domain family 16, member A	protein-coding
147.982	0.173743	0.309481	0.561402	0.574524	0.955217	Cx3cr1WT-Cx3cr1KO	chr17	12991745	12992009	+	1000	intron (NM_175394, intron 1 of 5)	CpG	382	NM_001113533	60532	Mm.275521	NM_175394	ENSMUSG00000060475	Wtap	2810408K05Rik|9430038B09Rik	Wilms tumour 1-associating protein	protein-coding
74.471	-0.189416	0.355999	-0.532069	0.594678	0.958203	Cx3cr1WT-Cx3cr1KO	chr15	58215416	58215612	+	1000	promoter-TSS (NM_026346)	promoter-TSS (NM_026346)	-622	NM_026346	67731	Mm.25683	NM_026346	ENSMUSG00000022358	Fbxo32	4833442G10Rik|AI430017|ATROGIN1|Gm20361|MAFbx	F-box protein 32	protein-coding
82.4598	0.325147	0.353719	0.919225	0.357978	0.905709	Cx3cr1WT-Cx3cr1KO	chr11	5521489	5521752	+	1000	intron (NM_013842, intron 1 of 4)	CpG	979	NM_001271730	22433	Mm.469937	NM_013842	ENSMUSG00000020484	Xbp1	D11Ertd39e|TREB-5|TREB5|XBP-1	X-box binding protein 1	protein-coding
58.9175	-0.308836	0.359346	-0.859439	0.390098	0.914739	Cx3cr1WT-Cx3cr1KO	chr11	4986849	4987046	+	1000	5' UTR (NM_007454, exon 1 of 21)	5' UTR (NM_007454, exon 1 of 21)	123	NM_001355660	11764	Mm.274816	NM_007454	ENSMUSG00000009090	Ap1b1	Adtb1|b2b1660Clo	adaptor protein complex AP-1, beta 1 subunit	protein-coding
60.4135	0.569296	0.355191	1.60279	0.108981	0.714959	Cx3cr1WT-Cx3cr1KO	chr3	96057871	96058088	+	1000	5' UTR (NM_013841, exon 1 of 15)	5' UTR (NM_013841, exon 1 of 15)	476	NM_013841	22365	Mm.263185	NM_013841	ENSMUSG00000015747	Vps45	AI462172|AW554165|mVps45	vacuolar protein sorting 45	protein-coding
159.217	0.0233182	0.290607	0.0802397	0.936047	0.995804	Cx3cr1WT-Cx3cr1KO	chr11	109362340	109362599	+	1000	promoter-TSS (NM_010303)	promoter-TSS (NM_010303)	-325	NM_010303	14674	Mm.193925	NM_010303	ENSMUSG00000020611	Gna13	AU024132|AU043124|Galpha13	guanine nucleotide binding protein, alpha 13	protein-coding
96.0088	0.115414	0.340784	0.338671	0.734857	0.98239	Cx3cr1WT-Cx3cr1KO	chr3	96635479	96635709	+	1000	promoter-TSS (NM_001162388)	promoter-TSS (NM_001162388)	164	NR_027844	18632	Mm.20901	NM_011069	ENSMUSG00000028102	Pex11b	PEX11beta|Pex11pbeta	peroxisomal biogenesis factor 11 beta	protein-coding
114.485	-0.309326	0.345318	-0.895769	0.370376	0.909567	Cx3cr1WT-Cx3cr1KO	chr5	33782843	33783113	+	1000	promoter-TSS (NM_019694)	promoter-TSS (NM_019694)	-274	NM_019694	56384	Mm.260538	NM_019694	ENSMUSG00000005299	Letm1	-	leucine zipper-EF-hand containing transmembrane protein 1	protein-coding
88.8276	0.0877488	0.337586	0.25993	0.794917	0.98788	Cx3cr1WT-Cx3cr1KO	chr11	109347644	109347921	+	1000	intron (NR_027883, intron 1 of 1)	intron (NR_027883, intron 1 of 1)	915	NR_027883	67927	Mm.394490	NR_027883	ENSMUSG00000099630	1700096J18Rik	-	RIKEN cDNA 1700096J18 gene	ncRNA
57.6803	0.0109458	0.358325	0.0305472	0.975631	0.998197	Cx3cr1WT-Cx3cr1KO	chr16	20611519	20611805	+	1000	promoter-TSS (NM_177940)	promoter-TSS (NM_177940)	61	NM_025462	110599566	Mm.263319	NM_025462		Eef1akmt4	-	eukaryotic translation elongation factor 1 alpha lysine specific methyltransferase 4	protein-coding
500.78	0.263461	0.195395	1.34835	0.177544	0.814858	Cx3cr1WT-Cx3cr1KO	chr11	100939222	100939500	+	1000	5' UTR (NM_011486, exon 1 of 24)	5' UTR (NM_011486, exon 1 of 24)	179	NM_213660	20848	Mm.249934	NM_011486	ENSMUSG00000004040	Stat3	1110034C02Rik|AW109958|Aprf	signal transducer and activator of transcription 3	protein-coding
159.225	0.284254	0.3039	0.935354	0.349606	0.902562	Cx3cr1WT-Cx3cr1KO	chr9	54699339	54699630	+	1000	promoter-TSS (NM_021422)	promoter-TSS (NM_021422)	-75	NM_021422	58233	Mm.489676	NM_021422	ENSMUSG00000032285	Dnaja4	1110021L12Rik|AV358213|Dj4|Hsj4|mmDjA4	DnaJ heat shock protein family (Hsp40) member A4	protein-coding
70.124	0.0328018	0.352156	0.0931456	0.925788	0.994647	Cx3cr1WT-Cx3cr1KO	chr1	151571328	151571610	+	1000	promoter-TSS (NM_022018)	promoter-TSS (NM_022018)	96	NM_022018	63913	Mm.157700	NM_022018	ENSMUSG00000026483	Fam129a	AI256368|AU019833|Niban	family with sequence similarity 129, member A	protein-coding
139.67	-0.390406	0.308243	-1.26655	0.205315	0.840097	Cx3cr1WT-Cx3cr1KO	chr13	93303488	93303833	+	1000	promoter-TSS (NM_001284189)	promoter-TSS (NM_001284189)	-97	NM_147176	26556	Mm.37533	NM_011982	ENSMUSG00000007617	Homer1	PSD-Zip45|SYN47|Ves-1|homer-1|vesl-1	homer scaffolding protein 1	protein-coding
152.239	-0.299629	0.292463	-1.0245	0.305599	0.892713	Cx3cr1WT-Cx3cr1KO	chr15	78935145	78935379	+	1000	intron (NM_133800, intron 1 of 5)	CpG	329	NM_133800	97961	Mm.157216	NM_133800	ENSMUSG00000033099	Nol12	C78541|Nop25	nucleolar protein 12	protein-coding
116.473	-0.229698	0.3142	-0.731056	0.464745	0.931076	Cx3cr1WT-Cx3cr1KO	chr17	23599192	23599448	+	1000	5' UTR (NM_011747, exon 1 of 6)	5' UTR (NM_011747, exon 1 of 6)	167	NM_011747	22654	Mm.40326	NM_011747	ENSMUSG00000062012	Zfp13	AI835008|Krox-8|Zfp-13	zinc finger protein 13	protein-coding
146	-0.176568	0.326195	-0.541295	0.588304	0.957758	Cx3cr1WT-Cx3cr1KO	chr11	59542430	59542788	+	1000	promoter-TSS (NM_145827)	promoter-TSS (NM_145827)	-77	NM_145827	216799	Mm.54174	NM_145827	ENSMUSG00000032691	Nlrp3	AGTAVPRL|AII/AVP|Cias1|FCAS|FCU|MWS|Mmig1|NALP3|Pypaf1	NLR family, pyrin domain containing 3	protein-coding
63.4573	-0.813892	0.361853	-2.24923	0.0244977	0.461779	Cx3cr1WT-Cx3cr1KO	chr11	60728395	60728591	+	1000	promoter-TSS (NR_039559)	promoter-TSS (NR_039559)	95	NM_001009927	237781	Mm.339760	NM_001009927	ENSMUSG00000018599	Mief2	AI482195|Gm11|Smcr7	mitochondrial elongation factor 2	protein-coding
61.2077	0.275004	0.360305	0.763254	0.445312	0.927286	Cx3cr1WT-Cx3cr1KO	chr2	128429278	128429567	+	1000	promoter-TSS (NR_028589)	promoter-TSS (NR_028589)	-71	NR_028590	100043424	Mm.297222	NR_028589		Gm14005	-	predicted gene 14005	ncRNA
94.2041	-0.382949	0.349916	-1.0944	0.273778	0.87665	Cx3cr1WT-Cx3cr1KO	chr17	66111392	66111628	+	1000	promoter-TSS (NM_001037757)	promoter-TSS (NM_001037757)	-36	NM_026833	68767	Mm.296545	NM_026833	ENSMUSG00000024101	Washc1	1110049F14Rik|ORF19|Wash|Wash1	WASH complex subunit 1	protein-coding
99.9045	0.326014	0.336141	0.969871	0.332111	0.902562	Cx3cr1WT-Cx3cr1KO	chr13	46669333	46669627	+	1000	promoter-TSS (NM_001033192)	promoter-TSS (NM_001033192)	-42	NM_001033192	97863	Mm.275934	NM_001033192	ENSMUSG00000069237	Fam8a1	C78339	family with sequence similarity 8, member A1	protein-coding
88.5739	-0.614068	0.33642	-1.8253	0.0679559	0.624613	Cx3cr1WT-Cx3cr1KO	chr5	24577210	24577442	+	1000	promoter-TSS (NM_001359205)	promoter-TSS (NM_001359205)	20	NM_001359205	27407	Mm.21629	NM_013853	ENSMUSG00000028953	Abcf2	0710005O05Rik|Drr3|E430001O06	ATP-binding cassette, sub-family F (GCN20), member 2	protein-coding
73.6153	-0.123011	0.346457	-0.355054	0.722549	0.981655	Cx3cr1WT-Cx3cr1KO	chr1	75521295	75521559	+	1000	promoter-TSS (NM_027886)	promoter-TSS (NM_027886)	-102	NM_027886	71728	Mm.312650	NM_027886	ENSMUSG00000026213	Stk11ip	1200014D22Rik|BB131189|LIP1|LKB1IP	serine/threonine kinase 11 interacting protein	protein-coding
472.795	0.107708	0.207489	0.519102	0.60369	0.958743	Cx3cr1WT-Cx3cr1KO	chr12	80945452	80945656	+	1000	promoter-TSS (NM_001347416)	promoter-TSS (NM_001347416)	55	NM_001347415	20384	Mm.43331	NM_009159	ENSMUSG00000021134	Srsf5	Sfrs5	serine/arginine-rich splicing factor 5	protein-coding
164.655	0.64377	0.29641	2.17189	0.0298639	0.490466	Cx3cr1WT-Cx3cr1KO	chr11	117809603	117809853	+	1000	promoter-TSS (NM_009304)	promoter-TSS (NM_009304)	61	NM_009304	20973	Mm.468228	NM_009304	ENSMUSG00000048277	Syngr2	Clast2|cellugyrin	synaptogyrin 2	protein-coding
402.197	0.32926	0.235437	1.39851	0.161961	0.798225	Cx3cr1WT-Cx3cr1KO	chr1	64121742	64121984	+	1000	promoter-TSS (NM_033563)	promoter-TSS (NM_033563)	-474	NM_033563	93691	Mm.29466	NM_033563	ENSMUSG00000025959	Klf7	9830124P08Rik	Kruppel-like factor 7 (ubiquitous)	protein-coding
119.444	0.0584955	0.31929	0.183205	0.854637	0.993786	Cx3cr1WT-Cx3cr1KO	chr5	143403791	143404038	+	1000	promoter-TSS (NM_025841)	promoter-TSS (NM_025841)	94	NM_025841	66913	Mm.181880	NM_025841	ENSMUSG00000079111	Kdelr2	1110007A14Rik	KDEL (Lys-Asp-Glu-Leu) endoplasmic reticulum protein retention receptor 2	protein-coding
140.971	0.0866994	0.318747	0.272001	0.785621	0.986928	Cx3cr1WT-Cx3cr1KO	chr14	54863977	54864393	+	1000	promoter-TSS (NM_001177705)	promoter-TSS (NM_001177705)	-27	NM_001177705	239099	Mm.280994	NM_183174	ENSMUSG00000057156	Homez	mKIAA1443	homeodomain leucine zipper-encoding gene	protein-coding
40.8715	-0.216312	0.363587	-0.594938	0.551885	NA	Cx3cr1WT-Cx3cr1KO	chr16	97851064	97851391	+	1000	promoter-TSS (NM_144789)	promoter-TSS (NM_144789)	0	NM_144789	114604	Mm.328741	NM_144789	ENSMUSG00000014039	Prdm15	C21orf83|E130018M06Rik|ORF62|Zfp298	PR domain containing 15	protein-coding
30.879	0.0407738	0.361051	0.112931	0.910085	NA	Cx3cr1WT-Cx3cr1KO	chr4	137994133	137994352	+	1000	intron (NM_001256195, intron 2 of 34)	CpG-10542	786	NM_172703	230861	Mm.268903	NM_172703	ENSMUSG00000028760	Eif4g3	1500002J22Rik|4930523M17Rik|G1-419-52|eIF4GII|repro8	eukaryotic translation initiation factor 4 gamma, 3	protein-coding
489.661	-0.116394	0.20948	-0.555633	0.578462	0.955217	Cx3cr1WT-Cx3cr1KO	chr11	5762214	5762439	+	1000	promoter-TSS (NM_001361588)	promoter-TSS (NM_001361588)	50	NM_001361588	72046	Mm.271657	NM_178623	ENSMUSG00000049680	Urgcp	2010005J08Rik|9130001I21Rik|AW060359|Urg4|mKIAA1507	upregulator of cell proliferation	protein-coding
255.635	-0.181597	0.249464	-0.727949	0.466645	0.931076	Cx3cr1WT-Cx3cr1KO	chr19	6046877	6047130	+	1000	promoter-TSS (NM_001164709)	promoter-TSS (NM_001164709)	-142	NM_001164709	74126	Mm.149870	NM_028769	ENSMUSG00000024807	Syvn1	1200010C09Rik|AW211966|C85322|D530017H19Rik|Hrd1	synovial apoptosis inhibitor 1, synoviolin	protein-coding
52.3824	-0.171506	0.363199	-0.472209	0.636777	0.966928	Cx3cr1WT-Cx3cr1KO	chr8	105170709	105170911	+	1000	5' UTR (NM_001161457, exon 1 of 5)	5' UTR (NM_001161457, exon 1 of 5)	136	NM_001161458	12400	Mm.2018	NM_022309	ENSMUSG00000031885	Cbfb	AI893578|PEA2|PEBP2b|Pebp2|Pebpb2	core binding factor beta	protein-coding
214.798	-0.235651	0.270366	-0.871602	0.383426	0.914739	Cx3cr1WT-Cx3cr1KO	chr5	110809919	110810184	+	1000	promoter-TSS (NM_009469)	promoter-TSS (NM_009469)	30	NM_009469	22241	Mm.271898	NM_009469	ENSMUSG00000029512	Ulk1	AU041434|Unc51.1|mKIAA0722	unc-51 like kinase 1	protein-coding
111.528	0.475712	0.330897	1.43764	0.150535	0.781179	Cx3cr1WT-Cx3cr1KO	chr3	132683977	132684316	+	1000	promoter-TSS (NM_001163455)	promoter-TSS (NM_001163455)	2	NM_001163455	271981	Mm.257864	NM_173032	ENSMUSG00000028030	Tbck	1700120J03Rik|9430001M19|A630047E20Rik|C030007I09Rik|Tbckl	TBC1 domain containing kinase	protein-coding
151.459	-0.0263425	0.291886	-0.0902495	0.928089	0.994985	Cx3cr1WT-Cx3cr1KO	chr7	132813569	132813838	+	1000	promoter-TSS (NM_212473)	promoter-TSS (NM_212473)	-507	NM_212473	77938	Mm.225649	NM_175268	ENSMUSG00000030956	Fam53b	A930008G19Rik|mKIAA0140	family with sequence similarity 53, member B	protein-coding
329.908	-0.0352224	0.228148	-0.154384	0.877307	0.993944	Cx3cr1WT-Cx3cr1KO	chr10	80075256	80075475	+	1000	promoter-TSS (NM_001359636)	promoter-TSS (NM_001359636)	74	NM_001359636	216161	Mm.262102	NM_183426	ENSMUSG00000035673	Sbno2	BC019206|F730040C21|Sno|Stno	strawberry notch 2	protein-coding
155.757	-0.15349	0.29154	-0.52648	0.598555	0.958557	Cx3cr1WT-Cx3cr1KO	chr7	27195845	27196182	+	1000	promoter-TSS (NM_001046637)	promoter-TSS (NM_001046637)	232	NM_001243888	414069	Mm.379069	NM_001243888	ENSMUSG00000078786	BC024978	-	cDNA sequence BC024978	protein-coding
79.4626	0.0425287	0.345351	0.123146	0.901991	0.993944	Cx3cr1WT-Cx3cr1KO	chr2	155826526	155826790	+	1000	5' UTR (NM_010579, exon 1 of 6)	5' UTR (NM_010579, exon 1 of 6)	267	NM_010579	16418	Mm.271674	NM_010579	ENSMUSG00000027613	Eif6	1110004P11|AA408895|CAB|Itgb4bp|eIF-6|imc-415|p27(BBP)|p27BBP	eukaryotic translation initiation factor 6	protein-coding
66.4029	-0.420208	0.353071	-1.19015	0.233986	0.85955	Cx3cr1WT-Cx3cr1KO	chr15	5108392	5108632	+	1000	promoter-TSS (NM_001163138)	promoter-TSS (NM_001163138)	21	NM_001163138	239319	Mm.31252	NM_001163138	ENSMUSG00000041849	Card6	D730008L15	caspase recruitment domain family, member 6	protein-coding
44.1925	-0.169102	0.359092	-0.470916	0.637701	NA	Cx3cr1WT-Cx3cr1KO	chr17	8164859	8165077	+	1000	promoter-TSS (NM_001197046)	promoter-TSS (NM_001197046)	-550	NM_001197046	75296	Mm.227250	NM_201230	ENSMUSG00000069135	Fgfr1op	4930553O10Rik|FOP	Fgfr1 oncogene partner	protein-coding
81.075	-0.0339337	0.349375	-0.0971269	0.922626	0.994647	Cx3cr1WT-Cx3cr1KO	chr2	118926398	118926711	+	1000	promoter-TSS (NM_028117)	promoter-TSS (NM_028117)	57	NM_028117	72136	Mm.486238	NM_028117	ENSMUSG00000074916	Chst14	2600016L03Rik|D4ST-1|D4st1	carbohydrate (N-acetylgalactosamine 4-0) sulfotransferase 14	protein-coding
154.12	-0.0302897	0.296144	-0.10228	0.918534	0.994132	Cx3cr1WT-Cx3cr1KO	chr6	145211128	145211385	+	1000	promoter-TSS (NM_177222)	promoter-TSS (NM_177222)	109	NM_001362057	67636	Mm.486359	NM_133688	ENSMUSG00000040370	Etfrf1	4930469P12Rik|AL022899|Ghiso|Lyrm5	electron transfer flavoprotein regulatory factor 1	protein-coding
94.2755	0.629736	0.353128	1.78331	0.0745366	0.642598	Cx3cr1WT-Cx3cr1KO	chr15	36609407	36609609	+	1000	promoter-TSS (NM_008774)	promoter-TSS (NM_008774)	-535	NM_008774	18458	Mm.371570	NM_008774	ENSMUSG00000022283	Pabpc1	PABP|Pabp1|PabpI|Pabpl1|ePAB	poly(A) binding protein, cytoplasmic 1	protein-coding
66.9919	0.11111	0.356001	0.312105	0.754961	0.983463	Cx3cr1WT-Cx3cr1KO	chr6	83441390	83441633	+	1000	promoter-TSS (NR_028382)	promoter-TSS (NR_028382)	167	NM_183138	194388	Mm.211030	NM_183138	ENSMUSG00000034832	Tet3	B430006D22Rik|BC037432|D230004J03Rik	tet methylcytosine dioxygenase 3	protein-coding
208.487	0.423538	0.268651	1.57653	0.114903	0.726017	Cx3cr1WT-Cx3cr1KO	chr2	144270280	144270535	+	1000	promoter-TSS (NM_001289630)	promoter-TSS (NM_001289630)	165	NM_024225	69178	Mm.273379	NM_024225	ENSMUSG00000027423	Snx5	0910001N05Rik|1810032P22Rik|AU019504|D2Ertd52e	sorting nexin 5	protein-coding
36.1932	-0.118365	0.196303	-0.602973	0.546527	NA	Cx3cr1WT-Cx3cr1KO	chr6	136922515	136922787	+	1000	promoter-TSS (NM_026983)	promoter-TSS (NM_026983)	-471	NM_026983	69187	Mm.33692	NM_026983	ENSMUSG00000030219	Erp27	1810033M07Rik|1810047B09Rik	endoplasmic reticulum protein 27	protein-coding
72.7243	0.221557	0.35312	0.627426	0.53038	0.947185	Cx3cr1WT-Cx3cr1KO	chr10	71237903	71238156	+	1000	promoter-TSS (NM_009360)	promoter-TSS (NM_009360)	15	NM_009360	21780	Mm.229292	NM_009360	ENSMUSG00000003923	Tfam	AI661103|Hmgts|mtTFA|tsHMG	transcription factor A, mitochondrial	protein-coding
43.0838	-0.461184	0.363614	-1.26833	0.204679	NA	Cx3cr1WT-Cx3cr1KO	chr5	24424938	24425191	+	1000	promoter-TSS (NM_009207)	promoter-TSS (NM_009207)	-168	NM_009207	20535	Mm.4580	NM_009207	ENSMUSG00000028962	Slc4a2	Ae2|B3RP	solute carrier family 4 (anion exchanger), member 2	protein-coding
269.299	0.154339	0.257451	0.599488	0.548848	0.949981	Cx3cr1WT-Cx3cr1KO	chr17	23803112	23803361	+	1000	promoter-TSS (NM_175229)	promoter-TSS (NM_175229)	49	NM_175229	75956	Mm.5222	NM_175229	ENSMUSG00000039218	Srrm2	5033413A03Rik|AA410130|SRm300|mKIAA0324	serine/arginine repetitive matrix 2	protein-coding
77.8702	-0.612008	0.345422	-1.77177	0.0764331	0.645104	Cx3cr1WT-Cx3cr1KO	chr9	103365993	103366253	+	1000	promoter-TSS (NM_001134426)	promoter-TSS (NM_001134426)	-343	NM_175565	321022	Mm.261025	NM_175565	ENSMUSG00000032803	Cdv3	2510010F10Rik|C230084J24Rik|C79446|TPP36	carnitine deficiency-associated gene expressed in ventricle 3	protein-coding
133.102	0.252012	0.302796	0.832285	0.405248	0.914739	Cx3cr1WT-Cx3cr1KO	chr7	16273115	16273366	+	1000	TTS (NM_001136471)	TTS (NM_001136471)	452	NM_001136270	66300	Mm.218698	NM_001136270	ENSMUSG00000091811	Inafm1	2610014I16Rik|Prr24	InaF motif containing 1	protein-coding
77.9476	0.704295	0.342875	2.05409	0.0399669	0.535648	Cx3cr1WT-Cx3cr1KO	chr13	94285426	94285699	+	1000	promoter-TSS (NM_029153)	promoter-TSS (NM_029153)	269	NM_001346609	107767	Mm.201455	NM_029153	ENSMUSG00000021687	Scamp1	4930505M11Rik|AI415563|AW122395	secretory carrier membrane protein 1	protein-coding
94.0067	0.652524	0.333642	1.95576	0.0504932	0.568935	Cx3cr1WT-Cx3cr1KO	chr18	36281063	36281259	+	1000	promoter-TSS (NM_008989)	promoter-TSS (NM_008989)	-1	NM_008989	19290	Mm.231802	NM_008989	ENSMUSG00000043991	Pura	CAGER-1|Pur-alpha|ssCRE-BP	purine rich element binding protein A	protein-coding
170.047	-0.414442	0.287332	-1.44238	0.149195	0.778099	Cx3cr1WT-Cx3cr1KO	chr11	95310035	95310255	+	1000	promoter-TSS (NR_155298)	promoter-TSS (NR_155298)	101	NM_001195004	217127	Mm.90213	NM_177619	ENSMUSG00000038909	Kat7	Hbo1|Hboa|Myst2	K(lysine) acetyltransferase 7	protein-coding
259.169	-0.148621	0.246197	-0.603667	0.546065	0.949794	Cx3cr1WT-Cx3cr1KO	chr5	27791692	27791930	+	1000	promoter-TSS (NM_018878)	promoter-TSS (NM_018878)	-261	NM_018878	55982	Mm.277190	NM_018878	ENSMUSG00000002221	Paxip1	D5Ertd149e|PTIP	PAX interacting (with transcription-activation domain) protein 1	protein-coding
51.3336	-0.372492	0.363324	-1.02523	0.305253	0.892713	Cx3cr1WT-Cx3cr1KO	chr7	25268446	25268672	+	1000	intron (NM_001302811, intron 1 of 20)	intron (NM_001302811, intron 1 of 20)	860	NM_001302811	71722	Mm.28833	NM_027882	ENSMUSG00000005442	Cic	1200010B10Rik|mKIAA0306	capicua transcriptional repressor	protein-coding
343.322	-0.0179202	0.232359	-0.077123	0.938526	0.996092	Cx3cr1WT-Cx3cr1KO	chr10	41519446	41519650	+	1000	promoter-TSS (NM_016898)	promoter-TSS (NM_016898)	48	NM_016898	53599	Mm.269815	NM_016898	ENSMUSG00000019818	Cd164	A115|A24|AA589639|AW540279|MGC-24|MSSP	CD164 antigen	protein-coding
1081.83	0.110174	0.152251	0.723637	0.469289	0.931076	Cx3cr1WT-Cx3cr1KO	chr10	21994612	21994824	+	1000	promoter-TSS (NM_011361)	promoter-TSS (NM_011361)	52	NM_011361	20393	Mm.28405	NM_011361	ENSMUSG00000019970	Sgk1	Sgk	serum/glucocorticoid regulated kinase 1	protein-coding
60.4681	0.152695	0.357051	0.427656	0.668902	0.9758	Cx3cr1WT-Cx3cr1KO	chr4	109280229	109280460	+	1000	promoter-TSS (NM_007943)	promoter-TSS (NM_007943)	69	NM_007943	13858	Mm.318250	NM_007943	ENSMUSG00000028552	Eps15	2410112D09Rik	epidermal growth factor receptor pathway substrate 15	protein-coding
135.928	1.0187	0.304837	3.3418	0.00083238	0.138651	Cx3cr1WT-Cx3cr1KO	chr2	26389188	26389552	+	1000	promoter-TSS (NM_173180)	promoter-TSS (NM_173180)	22	NM_173180	66865	Mm.250359	NM_173180	ENSMUSG00000026926	Pmpca	1200002L24Rik|4933435E07Rik|Alpha-MPP|P-55	peptidase (mitochondrial processing) alpha	protein-coding
187.676	0.139774	0.276192	0.506076	0.612803	0.958833	Cx3cr1WT-Cx3cr1KO	chr8	85071962	85072170	+	1000	intron (NM_001039514, intron 1 of 8)	CpG	309	NM_001039514	330817	Mm.193086	NM_201408	ENSMUSG00000060038	Dhps	Dhs	deoxyhypusine synthase	protein-coding
104.041	-0.451619	0.329124	-1.37218	0.170007	0.809597	Cx3cr1WT-Cx3cr1KO	chr15	79141191	79141485	+	1000	promoter-TSS (NM_001310579)	promoter-TSS (NM_001310579)	13	NM_027231	69833	Mm.279861	NM_027231	ENSMUSG00000033020	Polr2f	1810060D16Rik|RPB6	polymerase (RNA) II (DNA directed) polypeptide F	protein-coding
72.8591	-0.0169764	0.345793	-0.0490942	0.960844	0.998197	Cx3cr1WT-Cx3cr1KO	chr6	113237765	113237982	+	1000	promoter-TSS (NM_026849)	promoter-TSS (NM_026849)	30	NR_155433	97287	Mm.197816	NM_026849	ENSMUSG00000030269	Mtmr14	1110061O04Rik|AW553738|C76151	myotubularin related protein 14	protein-coding
102.229	-0.0384795	0.350238	-0.109867	0.912515	0.993944	Cx3cr1WT-Cx3cr1KO	chr9	62838363	62838652	+	1000	promoter-TSS (NM_001033175)	promoter-TSS (NM_001033175)	-280	NM_001033175	76524	Mm.283636	NM_001033175	ENSMUSG00000032245	Cln6	1810065L06Rik|AW743417|D9Bwg1455e|nclf	ceroid-lipofuscinosis, neuronal 6	protein-coding
98.7568	-0.193131	0.328188	-0.588477	0.556212	0.952473	Cx3cr1WT-Cx3cr1KO	chr3	27711176	27711435	+	1000	promoter-TSS (NM_173182)	promoter-TSS (NM_173182)	-853	NM_173182	72007	Mm.38832	NM_173182	ENSMUSG00000039286	Fndc3b	1600019O04Rik|AW550168|Fad104|mKIAA4164	fibronectin type III domain containing 3B	protein-coding
73.2762	-0.295648	0.34525	-0.85633	0.391815	0.914739	Cx3cr1WT-Cx3cr1KO	chr13	37826532	37826837	+	1000	promoter-TSS (NR_033615)	promoter-TSS (NR_033615)	-228	NM_001177868	68750	Mm.491109	NM_026830	ENSMUSG00000039087	Rreb1	1110037N09Rik|AA414966|B930013M22Rik	ras responsive element binding protein 1	protein-coding
175.627	0.60237	0.283303	2.12624	0.033483	0.506236	Cx3cr1WT-Cx3cr1KO	chr6	86195043	86195363	+	1000	promoter-TSS (NM_031199)	promoter-TSS (NM_031199)	-24	NM_031199	21802	Mm.137222	NM_031199	ENSMUSG00000029999	Tgfa	wa-1|wa1	transforming growth factor alpha	protein-coding
78.8517	0.120953	0.34613	0.349444	0.726756	0.981655	Cx3cr1WT-Cx3cr1KO	chr13	98814497	98814788	+	1000	intron (NM_172591, intron 1 of 25)	CpG	807	NM_172591	218503	Mm.23928	NM_172591	ENSMUSG00000041685	Fcho2	5832424M12Rik|AA387320	FCH domain only 2	protein-coding
96.5225	-0.02668	0.336793	-0.0792178	0.936859	0.995905	Cx3cr1WT-Cx3cr1KO	chr13	100492118	100492401	+	1000	non-coding (NR_153794, exon 1 of 18)	non-coding (NR_153794, exon 1 of 18)	135	NR_153794	23894	Mm.272533	NM_022011	ENSMUSG00000021639	Gtf2h2	44kDa|BTF2 p44|BTF2-p44|Btf2p44|p44	general transcription factor II H, polypeptide 2	protein-coding
68.5695	-0.135787	0.360259	-0.376914	0.706237	0.979658	Cx3cr1WT-Cx3cr1KO	chr9	54917198	54917452	+	1000	promoter-TSS (NM_177351)	promoter-TSS (NM_177351)	35	NM_177351	235386	Mm.259334	NM_177351	ENSMUSG00000035878	Hykk	Agphd1|C630028N24Rik	hydroxylysine kinase 1	protein-coding
43.3716	-0.19268	0.355632	-0.541794	0.58796	NA	Cx3cr1WT-Cx3cr1KO	chrX	74429650	74429881	+	1000	promoter-TSS (NM_010547)	promoter-TSS (NM_010547)	84	NM_010547	16151	Mm.12967	NM_010547	ENSMUSG00000004221	Ikbkg	1110037D23Rik|AI848108|AI851264|AW124339|IKK[g]|NEMO	inhibitor of kappaB kinase gamma	protein-coding
93.7774	0.788935	0.33472	2.357	0.0184234	0.430522	Cx3cr1WT-Cx3cr1KO	chr3	58414283	58414519	+	1000	promoter-TSS (NM_001081229)	promoter-TSS (NM_001081229)	-319	NM_001081229	72033	Mm.218409	NM_001081229	ENSMUSG00000027806	Tsc22d2	1810043J12Rik|5530402M19Rik	TSC22 domain family, member 2	protein-coding
203.597	-0.282582	0.27098	-1.04281	0.297034	0.890055	Cx3cr1WT-Cx3cr1KO	chr2	121170929	121171193	+	1000	promoter-TSS (NM_001290819)	promoter-TSS (NM_001290819)	64	NM_001290819	99334	Mm.188422	NM_178889	ENSMUSG00000050619	Zscan29	AW125441|Zfp690	zinc finger SCAN domains 29	protein-coding
239.755	0.11836	0.26877	0.440375	0.659665	0.972496	Cx3cr1WT-Cx3cr1KO	chr11	34047058	34047355	+	1000	5' UTR (NM_010696, exon 1 of 21)	5' UTR (NM_010696, exon 1 of 21)	278	NM_010696	16822	Mm.265350	NM_010696	ENSMUSG00000002699	Lcp2	AI323664|BB161688|SLP-76|SLP76|m1Khoe|twm	lymphocyte cytosolic protein 2	protein-coding
38.2115	-0.49438	0.363615	-1.35962	0.173949	NA	Cx3cr1WT-Cx3cr1KO	chr5	73256438	73256647	+	1000	promoter-TSS (NM_028194)	promoter-TSS (NM_028194)	76	NM_028194	72313	Mm.260594	NM_028194	ENSMUSG00000070733	Fryl	2010313D22Rik|2310004H21Rik|2510002A14Rik|9030227G01Rik|mKIAA0826	FRY like transcription coactivator	protein-coding
60.3054	-0.286918	0.35512	-0.807946	0.419122	0.919015	Cx3cr1WT-Cx3cr1KO	chr7	80269567	80269786	+	1000	promoter-TSS (NM_178070)	promoter-TSS (NM_178070)	21	NM_178070	233405	Mm.322870	NM_178070	ENSMUSG00000030534	Vps33b	-	vacuolar protein sorting 33B	protein-coding
147.11	0.323416	0.319673	1.01171	0.311676	0.892713	Cx3cr1WT-Cx3cr1KO	chr3	95141467	95141720	+	1000	intron (NM_027206, intron 1 of 1)	intron (NM_027206, intron 1 of 1)	767	NM_027206	69769	Mm.34368	NM_027206	ENSMUSG00000013707	Tnfaip8l2	1810019A08Rik|AW610835|TIPE2	tumor necrosis factor, alpha-induced protein 8-like 2	protein-coding
118.332	0.256918	0.315306	0.814823	0.415173	0.916121	Cx3cr1WT-Cx3cr1KO	chr19	61227592	61227797	+	1000	intron (NM_009970, intron 1 of 11)	CpG-7695	724	NM_009970	12982	Mm.287228	NM_009970	ENSMUSG00000059326	Csf2ra	CD116|Csfgmra|GM-CSF-Ra|GM-CSFR	colony stimulating factor 2 receptor, alpha, low-affinity (granulocyte-macrophage)	protein-coding
177.516	0.172951	0.280718	0.616102	0.537827	0.947185	Cx3cr1WT-Cx3cr1KO	chr6	18848320	18848605	+	1000	promoter-TSS (NM_133939)	promoter-TSS (NM_133939)	-173	NM_133939	76522	Mm.275158	NM_133939	ENSMUSG00000044155	Lsm8	2010003I05Rik|AW214405|Naa38	LSM8 homolog, U6 small nuclear RNA associated	protein-coding
75.4053	0.196306	0.34518	0.568707	0.569555	0.953728	Cx3cr1WT-Cx3cr1KO	chrX	73921609	73921884	+	1000	TTS (NM_001164704)	TTS (NM_001164704)	198	NM_001310538	56292	Mm.246654	NM_019870	ENSMUSG00000031388	Naa10	2310039H09Rik|Ard1|Ard1a|Te2	N(alpha)-acetyltransferase 10, NatA catalytic subunit	protein-coding
72.4897	0.543058	0.352692	1.53975	0.123621	0.739389	Cx3cr1WT-Cx3cr1KO	chr3	97610026	97610351	+	1000	promoter-TSS (NM_026539)	promoter-TSS (NM_026539)	2	NM_026539	68058	Mm.31761	NM_026539	ENSMUSG00000028089	Chd1l	4432404A22Rik|Alc1|Snf2p	chromodomain helicase DNA binding protein 1-like	protein-coding
120.961	-0.0804784	0.325912	-0.246933	0.80496	0.98788	Cx3cr1WT-Cx3cr1KO	chr8	69654368	69654632	+	1000	promoter-TSS (NM_001177527)	promoter-TSS (NM_001177527)	-56	NM_001177527	636741	Mm.480188	NM_001177527	ENSMUSG00000091764	Zfp964	4732490P12|EG636741|Gm7187	zinc finger protein 964	protein-coding
110.767	0.458363	0.327954	1.39764	0.16222	0.798225	Cx3cr1WT-Cx3cr1KO	chrX	36796138	36796368	+	1000	intron (NM_007451, intron 1 of 3)	CpG	656	NM_007451	11740	Mm.371544	NM_007451	ENSMUSG00000016319	Slc25a5	Ant2	solute carrier family 25 (mitochondrial carrier, adenine nucleotide translocator), member 5	protein-coding
140.556	0.192059	0.29916	0.641995	0.520876	0.946726	Cx3cr1WT-Cx3cr1KO	chr16	91485245	91485458	+	1000	exon (NM_010508, exon 1 of 11)	exon (NM_010508, exon 1 of 11)	136	NM_010508	15975	Mm.502	NM_010508	ENSMUSG00000022967	Ifnar1	Ifar|Ifnar|Ifrc|Infar	interferon (alpha and beta) receptor 1	protein-coding
61.7326	0.223563	0.353133	0.633086	0.526678	0.947185	Cx3cr1WT-Cx3cr1KO	chr13	95375178	95375560	+	1000	promoter-TSS (NM_025630)	promoter-TSS (NM_025630)	-12	NM_025630	66549	Mm.36785	NM_025630	ENSMUSG00000021681	Aggf1	2010009L17Rik|2310029P06Rik|AW112072|Peg3|VG5Q	angiogenic factor with G patch and FHA domains 1	protein-coding
436.151	-0.112331	0.214737	-0.523108	0.600899	0.958557	Cx3cr1WT-Cx3cr1KO	chr10	59221869	59222092	+	1000	promoter-TSS (NM_172939)	promoter-TSS (NM_172939)	58	NM_172939	268301	Mm.3036	NM_172939	ENSMUSG00000098188	Sowahc	4921515A04Rik|9430099J10Rik|Ankrd57|C820004L04Rik	sosondowah ankyrin repeat domain family member C	protein-coding
276.183	0.186433	0.264237	0.705553	0.480466	0.931076	Cx3cr1WT-Cx3cr1KO	chr7	109519132	109519354	+	1000	promoter-TSS (NM_011975)	promoter-TSS (NM_011975)	48	NM_011975	26451	Mm.305750	NM_011975	ENSMUSG00000046364	Rpl27a	L27'|L27A|L29	ribosomal protein L27A	protein-coding
239.282	-0.0939812	0.263094	-0.357215	0.720931	0.981655	Cx3cr1WT-Cx3cr1KO	chr3	108283735	108283973	+	1000	promoter-TSS (NM_001271599)	promoter-TSS (NM_001271599)	-210	NM_001271599	20661	Mm.157119	NM_019972	ENSMUSG00000068747	Sort1	2900053A11Rik|AI852375|Ntr3|Ntsr3	sortilin 1	protein-coding
185.782	-0.396359	0.328304	-1.20729	0.22732	0.854106	Cx3cr1WT-Cx3cr1KO	chr9	64179234	64179450	+	1000	promoter-TSS (NM_183316)	promoter-TSS (NM_183316)	45	NM_183316	330959	Mm.24082	NM_183316	ENSMUSG00000032398	Snapc5	2010103A03Rik	small nuclear RNA activating complex, polypeptide 5	protein-coding
180.48	-0.327434	0.285559	-1.14664	0.25153	0.860364	Cx3cr1WT-Cx3cr1KO	chr18	75005742	75006045	+	1000	promoter-TSS (NM_001001181)	promoter-TSS (NM_001001181)	54	NM_001001181	407819	Mm.29866	NM_001001181	ENSMUSG00000036299	BC031181	-	cDNA sequence BC031181	protein-coding
241.069	0.0854766	0.266018	0.321319	0.747968	0.982604	Cx3cr1WT-Cx3cr1KO	chr2	117120524	117120746	+	1000	promoter-TSS (NM_033524)	promoter-TSS (NM_033524)	-436	NM_001277256	114715	Mm.245890	NM_033524	ENSMUSG00000027351	Spred1	5730461F13Rik|AL024345|AW047647	sprouty protein with EVH-1 domain 1, related sequence	protein-coding
36.6025	-0.0911236	0.360099	-0.253052	0.800228	NA	Cx3cr1WT-Cx3cr1KO	chr12	3891354	3891555	+	1000	promoter-TSS (NM_153743)	promoter-TSS (NM_153743)	-290	NM_153743	13435	Mm.5001	NM_007872	ENSMUSG00000020661	Dnmt3a	MmuIIIA	DNA methyltransferase 3A	protein-coding
78.0116	-0.0273969	0.344345	-0.0795626	0.936585	0.995884	Cx3cr1WT-Cx3cr1KO	chr5	108461104	108461398	+	1000	promoter-TSS (NM_172716)	promoter-TSS (NM_172716)	-81	NM_172716	69587	Mm.261218	NM_172716	ENSMUSG00000033623	Pcgf3	2310035N15Rik|AI662857|D630042K08Rik|DONG1|E430039C14|RNF3A|Rnf3	polycomb group ring finger 3	protein-coding
160.536	0.161548	0.312962	0.516191	0.605721	0.958743	Cx3cr1WT-Cx3cr1KO	chr5	149052911	149053126	+	1000	promoter-TSS (NM_010439)	promoter-TSS (NM_010439)	39	NM_010439	15289	Mm.207047	NM_010439	ENSMUSG00000066551	Hmgb1	HMG-1|Hmg1|SBP-1|p30	high mobility group box 1	protein-coding
73.4667	0.196968	0.358394	0.549585	0.582604	0.956591	Cx3cr1WT-Cx3cr1KO	chr2	60283976	60284237	+	1000	exon (NM_001290660, exon 1 of 6)	exon (NM_001290660, exon 1 of 6)	378	NM_025422	66205	Mm.227281	NM_025422	ENSMUSG00000060703	Cd302	1110055L24Rik|AI159627	CD302 antigen	protein-coding
51.7118	0.157056	0.359163	0.437283	0.661906	0.972893	Cx3cr1WT-Cx3cr1KO	chr9	107975424	107975627	+	1000	promoter-TSS (NM_023738)	promoter-TSS (NM_023738)	-42	NM_023738	74153	Mm.277125	NM_023738	ENSMUSG00000032596	Uba7	1300004C08Rik|Ube1l	ubiquitin-like modifier activating enzyme 7	protein-coding
271.038	0.275644	0.255381	1.07934	0.280435	0.881368	Cx3cr1WT-Cx3cr1KO	chr17	28328398	28328683	+	1000	promoter-TSS (NM_011287)	promoter-TSS (NM_011287)	-25	NM_001357628	19896	Mm.336955	NM_011287	ENSMUSG00000037805	Rpl10a	CsA-19|Nedd6	ribosomal protein L10A	protein-coding
300.341	-0.0898909	0.242668	-0.370428	0.711064	0.981042	Cx3cr1WT-Cx3cr1KO	chr11	101070028	101070244	+	1000	promoter-TSS (NM_013792)	promoter-TSS (NM_013792)	42	NM_013792	27419	Mm.95452	NM_013792	ENSMUSG00000001751	Naglu	-	alpha-N-acetylglucosaminidase (Sanfilippo disease IIIB)	protein-coding
144.905	0.292508	0.307711	0.950596	0.341809	0.902562	Cx3cr1WT-Cx3cr1KO	chr2	164832799	164833026	+	1000	promoter-TSS (NM_008906)	promoter-TSS (NM_008906)	40	NM_001038492	19025	Mm.359633	NM_008906	ENSMUSG00000017760	Ctsa	AU019505|PPCA|Ppgb	cathepsin A	protein-coding
310.723	0.181557	0.252793	0.718206	0.47263	0.931076	Cx3cr1WT-Cx3cr1KO	chr16	5233542	5233770	+	1000	promoter-TSS (NM_145362)	promoter-TSS (NM_145362)	35	NM_145362	208211	Mm.34581	NM_145362	ENSMUSG00000039427	Alg1	HMAT1|HMT1	asparagine-linked glycosylation 1 (beta-1,4-mannosyltransferase)	protein-coding
86.9729	0.0721416	0.334725	0.215525	0.829358	0.991394	Cx3cr1WT-Cx3cr1KO	chr11	77494242	77494463	+	1000	intron (NM_001004144, intron 1 of 19)	intron (NM_001004144, intron 1 of 19)	940	NM_001004144	216963	Mm.290182	NM_001004144	ENSMUSG00000011877	Git1	Cat-1|p95Cat	G protein-coupled receptor kinase-interactor 1	protein-coding
83.8261	0.526632	0.360657	1.4602	0.144235	0.772977	Cx3cr1WT-Cx3cr1KO	chr15	93398237	93398588	+	1000	promoter-TSS (NM_175363)	promoter-TSS (NM_175363)	-52	NM_001285863	223828	Mm.74208	NM_146062	ENSMUSG00000036167	Pphln1	CR|HSPC206|HSPC232	periphilin 1	protein-coding
45.9886	0.157423	0.360996	0.436079	0.662779	NA	Cx3cr1WT-Cx3cr1KO	chr11	4134540	4134803	+	1000	promoter-TSS (NM_027859)	promoter-TSS (NM_027859)	-489	NM_027859	71673	Mm.240586	NM_027859	ENSMUSG00000003581	Rnf215	0610009J22Rik|AW557025|C77903	ring finger protein 215	protein-coding
129.298	0.542044	0.320076	1.69349	0.0903627	0.675403	Cx3cr1WT-Cx3cr1KO	chr3	51559699	51559921	+	1000	promoter-TSS (NR_033624)	promoter-TSS (NR_033624)	53	NR_033624	100039684	Mm.387178	NR_033624		5031434O11Rik	AI481280|Gm2370	RIKEN cDNA 5031434O11 gene	ncRNA
551.815	-0.12321	0.188687	-0.652987	0.513765	0.945086	Cx3cr1WT-Cx3cr1KO	chr11	77686083	77686295	+	1000	promoter-TSS (NM_001024205)	promoter-TSS (NM_001024205)	50	NM_001024205	68564	Mm.428996	NM_001024205	ENSMUSG00000037857	Nufip2	1110001M19Rik|9530056D24Rik|AI256692|AI461731|PIG1|mKIAA1321	nuclear fragile X mental retardation protein interacting protein 2	protein-coding
151.706	0.335978	0.325656	1.0317	0.302214	0.892713	Cx3cr1WT-Cx3cr1KO	chr17	46751995	46752231	+	1000	exon (NM_001305988, exon 1 of 5)	exon (NM_001305988, exon 1 of 5)	101	NM_001305989	72029	Mm.240325	NM_028065	ENSMUSG00000023973	Cnpy3	1600025D17Rik|2410050O22Rik|AI413153|CAG4A|ERDA5|PRAT4A|Tnrc5	canopy FGF signaling regulator 3	protein-coding
98.2868	-0.214097	0.331526	-0.645793	0.518413	0.946174	Cx3cr1WT-Cx3cr1KO	chr14	46822024	46822245	+	1000	5' UTR (NM_022023, exon 1 of 7)	5' UTR (NM_022023, exon 1 of 7)	108	NM_022023	63985	Mm.87312	NM_022023	ENSMUSG00000062014	Gmfb	3110001H22Rik|3110001O16Rik|AI851627|C79176|D14Ertd630e	glia maturation factor, beta	protein-coding
60.3759	0.0872653	0.355334	0.245586	0.806003	0.98788	Cx3cr1WT-Cx3cr1KO	chr19	55741741	55741948	+	1000	promoter-TSS (NM_001331147)	promoter-TSS (NM_001331147)	34	NM_001142923	21416	Mm.139815	NM_009333	ENSMUSG00000024985	Tcf7l2	TCF4B|TCF4E|Tcf-4|Tcf4	transcription factor 7 like 2, T cell specific, HMG box	protein-coding
47.8733	-0.789823	0.363062	-2.17545	0.0295963	0.488327	Cx3cr1WT-Cx3cr1KO	chr2	118547635	118547867	+	1000	promoter-TSS (NM_001311140)	promoter-TSS (NM_001311140)	-152	NM_001311140	171543	Mm.210125	NM_138313	ENSMUSG00000040093	Bmf	AW260063|AW411872	BCL2 modifying factor	protein-coding
180.22	0.634039	0.300943	2.10684	0.0351313	0.513318	Cx3cr1WT-Cx3cr1KO	chr16	11066284	11066553	+	1000	5' UTR (NM_009223, exon 1 of 2)	5' UTR (NM_009223, exon 1 of 2)	120	NM_009223	20621	Mm.325800	NM_009223	ENSMUSG00000037972	Snn	2810407J07Rik|AI848521|AW547286	stannin	protein-coding
121.045	-0.484115	0.320073	-1.51251	0.130403	0.749551	Cx3cr1WT-Cx3cr1KO	chr7	121034315	121034594	+	1000	promoter-TSS (NM_021554)	promoter-TSS (NM_021554)	9	NM_021554	59052	Mm.29122	NM_021554	ENSMUSG00000030876	Mettl9	0610012D09Rik|AA517660|Drev|MNCb-5680	methyltransferase like 9	protein-coding
38.559	-0.224521	0.362836	-0.618793	0.536053	NA	Cx3cr1WT-Cx3cr1KO	chr8	122476136	122476406	+	1000	promoter-TSS (NM_001033142)	promoter-TSS (NM_001033142)	128	NR_152823	66965	Mm.482288	NM_153775	ENSMUSG00000049482	Ctu2	2310061F22Rik|C16orf84|Ncs2	cytosolic thiouridylase subunit 2	protein-coding
125.253	-0.104094	0.312751	-0.332833	0.739261	0.98239	Cx3cr1WT-Cx3cr1KO	chr12	8673906	8674109	+	1000	promoter-TSS (NM_001160219)	promoter-TSS (NM_001160219)	-127	NM_001160221	80913	Mm.341243	NM_030723	ENSMUSG00000020594	Pum2	5730503J23Rik|Pumm2	pumilio RNA-binding family member 2	protein-coding
57.5658	0.331759	0.355943	0.932055	0.351308	0.902562	Cx3cr1WT-Cx3cr1KO	chr1	138856622	138856908	+	1000	promoter-TSS (NM_001081226)	promoter-TSS (NM_001081226)	89	NM_001081226	69549	Mm.264673	NM_001081226	ENSMUSG00000079283	2310009B15Rik	-	RIKEN cDNA 2310009B15 gene	protein-coding
174.12	0.431563	0.279934	1.54166	0.123156	0.739116	Cx3cr1WT-Cx3cr1KO	chr3	95818691	95819073	+	1000	promoter-TSS (NM_001081293)	promoter-TSS (NM_001081293)	71	NM_001081293	75137	Mm.196275	NM_028328	ENSMUSG00000028106	Rprd2	2810036A19Rik|4930535B03Rik|6720469I21Rik|AL022841|AL022940|AU021304|BB077382|mKIAA0460	regulation of nuclear pre-mRNA domain containing 2	protein-coding
275.309	-0.105201	0.251269	-0.418681	0.67545	0.9758	Cx3cr1WT-Cx3cr1KO	chr17	32403442	32403672	+	1000	promoter-TSS (NM_001347343)	promoter-TSS (NM_001347343)	25	NM_178785	320484	Mm.122284	NM_178785	ENSMUSG00000052142	Rasal3	A430107D22Rik	RAS protein activator like 3	protein-coding
101.972	0.32445	0.324394	1.00017	0.317228	0.898208	Cx3cr1WT-Cx3cr1KO	chr18	11839346	11839597	+	1000	promoter-TSS (NR_045421)	promoter-TSS (NR_045421)	-94	NR_045421	621998	Mm.353277	NR_045421		Gm6277	-	predicted gene 6277	ncRNA
38.7949	0.0515561	0.363617	0.141787	0.887249	NA	Cx3cr1WT-Cx3cr1KO	chr4	141060283	141060507	+	1000	intron (NM_001145958, intron 1 of 35)	CpG	150	NM_001145958	230872	Mm.80685	NM_172122	ENSMUSG00000040860	Crocc	-	ciliary rootlet coiled-coil, rootletin	protein-coding
68.1962	0.123389	0.360168	0.342587	0.731909	0.98239	Cx3cr1WT-Cx3cr1KO	chr5	21645957	21646184	+	1000	promoter-TSS (NM_177076)	promoter-TSS (NM_177076)	86	NM_026034	67211	Mm.260782	NM_026034	ENSMUSG00000038525	Armc10	2810037C14Rik|Svh	armadillo repeat containing 10	protein-coding
57.2666	-0.547609	0.357526	-1.53166	0.125606	0.743061	Cx3cr1WT-Cx3cr1KO	chr11	94210847	94211046	+	1000	promoter-TSS (NM_009427)	promoter-TSS (NM_009427)	-508	NM_009427	22057	Mm.259673	NM_009427	ENSMUSG00000037573	Tob1	Tob|Trob	transducer of ErbB-2.1	protein-coding
54.8969	0.742776	0.358791	2.07022	0.0384317	0.527166	Cx3cr1WT-Cx3cr1KO	chr11	99230743	99230974	+	1000	5' UTR (NM_020618, exon 1 of 11)	5' UTR (NM_020618, exon 1 of 11)	159	NM_020618	57376	Mm.379086	NM_020618	ENSMUSG00000037935	Smarce1	2810417B20Rik|5830412H02Rik|9030408N19Rik|Baf27	SWI/SNF related, matrix associated, actin dependent regulator of chromatin, subfamily e, member 1	protein-coding
73.0172	0.549598	0.351271	1.5646	0.117678	0.729297	Cx3cr1WT-Cx3cr1KO	chr5	123684106	123684348	+	1000	intron (NM_001359224, intron 1 of 18)	CpG	134	NM_019765	56430	Mm.241109	NM_019765	ENSMUSG00000049550	Clip1	1110007I12Rik|4631429H07Rik|AV017631|C81039|CLIP-170|CLIP170|CYLN1|Clip50|Rsn|mKIAA4046|restin	CAP-GLY domain containing linker protein 1	protein-coding
78.2477	-0.304871	0.357732	-0.852233	0.394085	0.914739	Cx3cr1WT-Cx3cr1KO	chr5	29378388	29378618	+	1000	promoter-TSS (NM_020295)	promoter-TSS (NM_020295)	-113	NM_020295	56873	Mm.41572	NM_020295	ENSMUSG00000010721	Lmbr1	1110048D14Rik|AU017641	limb region 1	protein-coding
32.5851	0.82052	0.351108	2.33694	0.0194422	NA	Cx3cr1WT-Cx3cr1KO	chr16	22657023	22657235	+	1000	5' UTR (NM_138650, exon 1 of 25)	5' UTR (NM_138650, exon 1 of 25)	102	NM_138650	110197	Mm.194986	NM_138650	ENSMUSG00000022861	Dgkg	2900055E17Rik|90kDa|AI854428|Dagk3|E430001K23Rik|mKIAA4131	diacylglycerol kinase, gamma	protein-coding
229.363	0.261118	0.261238	0.999543	0.317532	0.898208	Cx3cr1WT-Cx3cr1KO	chr13	55528358	55528642	+	1000	promoter-TSS (NM_013739)	promoter-TSS (NM_013739)	38	NM_013739	27261	Mm.33910	NM_013739	ENSMUSG00000035711	Dok3	AI450713|Dokl	docking protein 3	protein-coding
127.551	-0.0214256	0.33177	-0.0645797	0.948509	0.997307	Cx3cr1WT-Cx3cr1KO	chr4	135972469	135972736	+	1000	promoter-TSS (NM_011942)	promoter-TSS (NM_011942)	-8	NM_011942	26394	Mm.34302	NM_011942	ENSMUSG00000028670	Lypla2	LysoII	lysophospholipase 2	protein-coding
92.837	-0.185736	0.343597	-0.540563	0.588809	0.957758	Cx3cr1WT-Cx3cr1KO	chr5	115348821	115349048	+	1000	promoter-TSS (NM_007748)	promoter-TSS (NM_007748)	21	NM_007748	12861	Mm.43415	NM_007748	ENSMUSG00000041697	Cox6a1	VIaL	cytochrome c oxidase subunit VIa polypeptide 1	protein-coding
44.0917	-0.235496	0.362888	-0.648949	0.516372	NA	Cx3cr1WT-Cx3cr1KO	chr15	103163130	103163369	+	1000	promoter-TSS (NM_027885)	promoter-TSS (NM_027885)	35	NM_027885	71726	Mm.254820	NM_027885	ENSMUSG00000036061	Smug1	1200013B09Rik|A930006H09Rik|C85220	single-strand selective monofunctional uracil DNA glycosylase	protein-coding
61.6497	-0.0649162	0.358912	-0.180869	0.85647	0.993786	Cx3cr1WT-Cx3cr1KO	chr4	141060877	141061125	+	1000	promoter-TSS (NM_001145958)	promoter-TSS (NM_001145958)	-456	NM_001145958	230872	Mm.80685	NM_172122	ENSMUSG00000040860	Crocc	-	ciliary rootlet coiled-coil, rootletin	protein-coding
78.2942	0.0381755	0.349758	0.109148	0.913085	0.993944	Cx3cr1WT-Cx3cr1KO	chr9	46272989	46273207	+	1000	promoter-TSS (NM_011752)	promoter-TSS (NM_011752)	34	NM_011752	22687	Mm.17519	NM_011752	ENSMUSG00000032078	Zpr1	AI303781|Zfp259|Znf259	ZPR1 zinc finger	protein-coding
71.1573	-0.302679	0.353077	-0.85726	0.391301	0.914739	Cx3cr1WT-Cx3cr1KO	chr14	54893728	54893941	+	1000	promoter-TSS (NM_019402)	promoter-TSS (NM_019402)	-309	NM_019402	54196	Mm.7723	NM_019402	ENSMUSG00000022194	Pabpn1	PAB2|Pabp3|mPABII	poly(A) binding protein, nuclear 1	protein-coding
138.364	0.228553	0.328938	0.694819	0.487169	0.931648	Cx3cr1WT-Cx3cr1KO	chr9	37348235	37348584	+	1000	promoter-TSS (NM_001081429)	promoter-TSS (NM_001081429)	-17	NM_001081429	245902	Mm.390150	NM_001081429	ENSMUSG00000034303	Ccdc15	A630039F14Rik|D030074L19	coiled-coil domain containing 15	protein-coding
335.119	-0.114859	0.22987	-0.499666	0.61731	0.960809	Cx3cr1WT-Cx3cr1KO	chr11	49250498	49250717	+	1000	promoter-TSS (NM_001110150)	promoter-TSS (NM_001110150)	55	NM_001110150	17308	Mm.196933	NM_010794	ENSMUSG00000020346	Mgat1	Mgat-1	mannoside acetylglucosaminyltransferase 1	protein-coding
238.704	-0.173202	0.269173	-0.643459	0.519926	0.946726	Cx3cr1WT-Cx3cr1KO	chr11	119390411	119390679	+	1000	promoter-TSS (NR_035453)	promoter-TSS (NR_035453)	73	NR_035453	100316690		NR_035453	ENSMUSG00000088015	Mir1932	mir-1932|mmu-mir-1932	microRNA 1932	ncRNA
50.2336	-0.15625	0.363592	-0.429741	0.667384	0.974674	Cx3cr1WT-Cx3cr1KO	chr14	10453263	10453495	+	1000	promoter-TSS (NM_001308286)	promoter-TSS (NM_001308286)	79	NM_001308286	14198	Mm.397619	NM_010210	ENSMUSG00000060579	Fhit	AW045638|Fra14A2	fragile histidine triad gene	protein-coding
169.738	-0.206693	0.300255	-0.688393	0.491205	0.933577	Cx3cr1WT-Cx3cr1KO	chr5	34543324	34543548	+	1000	promoter-TSS (NM_001145858)	promoter-TSS (NM_001145858)	71	NM_001145858	24055	Mm.5012	NM_011893	ENSMUSG00000054520	Sh3bp2	3BP2	SH3-domain binding protein 2	protein-coding
78.7552	0.270013	0.344646	0.78345	0.433363	0.923458	Cx3cr1WT-Cx3cr1KO	chr7	101108163	101108484	+	1000	promoter-TSS (NM_001146010)	promoter-TSS (NM_001146010)	-452	NM_001146010	207278	Mm.263041	NM_199012	ENSMUSG00000030691	Fchsd2	BC034086|R74866|Sh3md3|mKIAA0769	FCH and double SH3 domains 2	protein-coding
106.895	0.0387579	0.323231	0.119908	0.904556	0.993944	Cx3cr1WT-Cx3cr1KO	chr2	91710857	91711086	+	1000	promoter-TSS (NM_145528)	promoter-TSS (NM_145528)	119	NM_001356518	241547	Mm.130331	NM_178724	ENSMUSG00000027243	Harbi1	D230010M03Rik	harbinger transposase derived 1	protein-coding
64.4671	-0.324013	0.35211	-0.920204	0.357466	0.905277	Cx3cr1WT-Cx3cr1KO	chr3	95138014	95138364	+	1000	TTS (NR_106175).2	TTS (NR_106175).2	997	NR_106201	102466888		NR_106201	ENSMUSG00000098931	Mir8099-2	Gm27692|mmu-mir-8099-2	microRNA 8099-2	ncRNA
46.5801	-0.110686	0.363174	-0.304775	0.760537	NA	Cx3cr1WT-Cx3cr1KO	chr19	28963808	28964049	+	1000	promoter-TSS (NM_028922)	promoter-TSS (NM_028922)	8	NM_028922	74411	Mm.441887	NM_028922	ENSMUSG00000040105	Plpp6	4932443D16Rik|Ppapdc2	phospholipid phosphatase 6	protein-coding
191.134	0.0905915	0.29688	0.305146	0.760255	0.983463	Cx3cr1WT-Cx3cr1KO	chr16	96128104	96128319	+	1000	promoter-TSS (NM_008251)	promoter-TSS (NM_008251)	-486	NM_008251	15312	Mm.2756	NM_008251	ENSMUSG00000040681	Hmgn1	HMG-14|Hmg14	high mobility group nucleosomal binding domain 1	protein-coding
59.6403	0.368283	0.362713	1.01536	0.309936	0.892713	Cx3cr1WT-Cx3cr1KO	chr17	34850402	34850637	+	1000	promoter-TSS (NM_021337)	promoter-TSS (NM_021337)	128	NM_001045864	27632	Mm.653	NM_138580	ENSMUSG00000024369	Nelfe	D17H6S45|NELF-E|RD|Rdbp	negative elongation factor complex member E, Rdbp	protein-coding
51.0452	0.395817	0.361038	1.09633	0.272934	0.87665	Cx3cr1WT-Cx3cr1KO	chr15	44619394	44619618	+	1000	promoter-TSS (NM_019480)	promoter-TSS (NM_019480)	66	NM_001357691	55960	Mm.287896	NM_019480	ENSMUSG00000022339	Ebag9	AI835379|Rcas1	estrogen receptor-binding fragment-associated gene 9	protein-coding
48.6644	1.13823	0.361431	3.14923	0.00163699	0.180555	Cx3cr1WT-Cx3cr1KO	chr17	27556294	27556510	+	1000	promoter-TSS (NM_001166536)	promoter-TSS (NM_001166536)	-172	NM_001166536	15361	Mm.4438	NM_016660	ENSMUSG00000046711	Hmga1	AL023995|Hmga1a|Hmga1b|Hmgi|Hmgiy|Hmgy	high mobility group AT-hook 1	protein-coding
161.307	0.0939895	0.29019	0.32389	0.746022	0.982604	Cx3cr1WT-Cx3cr1KO	chr5	110448365	110448610	+	1000	promoter-TSS (NM_001142642)	promoter-TSS (NM_001142642)	16	NM_001317042	381668	Mm.348782	NM_028596	ENSMUSG00000043323	Fbrsl1	2410025L10Rik|AI467568|Gm1049|Gm29766|mKIAA1545	fibrosin-like 1	protein-coding
76.5984	0.285292	0.354107	0.805666	0.420435	0.919373	Cx3cr1WT-Cx3cr1KO	chr3	32736987	32737228	+	1000	promoter-TSS (NM_029017)	promoter-TSS (NM_029017)	44	NM_025316	66046	Mm.28058	NM_025316	ENSMUSG00000027673	Ndufb5	0610007D05Rik|AU015782|CI-SGDH|SGDH	NADH dehydrogenase (ubiquinone) 1 beta subcomplex, 5	protein-coding
95.6675	0.367249	0.332907	1.10316	0.269958	0.876295	Cx3cr1WT-Cx3cr1KO	chr2	164460939	164461197	+	1000	promoter-TSS (NM_025575)	promoter-TSS (NM_025575)	97	NM_025575	66460	Mm.44218	NM_025575	ENSMUSG00000045503	Sys1	2610042O14Rik|AI266964|C87389	SYS1 Golgi-localized integral membrane protein homolog (S. cerevisiae)	protein-coding
26.6846	-0.40168	0.357991	-1.12204	0.261846	NA	Cx3cr1WT-Cx3cr1KO	chr3	108017681	108018014	+	1000	5' UTR (NM_010358, exon 1 of 8)	5' UTR (NM_010358, exon 1 of 8)	126	NM_010358	14862	Mm.37199	NM_010358	ENSMUSG00000058135	Gstm1	Gstb-1|Gstb1	glutathione S-transferase, mu 1	protein-coding
352.079	0.0639139	0.227916	0.280427	0.77915	0.986928	Cx3cr1WT-Cx3cr1KO	chr7	7298582	7298915	+	1000	promoter-TSS (NM_001302386)	promoter-TSS (NM_001302386)	88	NM_001302386	12727	Mm.297883	NM_011334	ENSMUSG00000000605	Clcn4	Clc4-2|Clcn4-2|clC-4	chloride channel, voltage-sensitive 4	protein-coding
176.807	0.068338	0.278721	0.245184	0.806314	0.98788	Cx3cr1WT-Cx3cr1KO	chr2	30415345	30415604	+	1000	promoter-TSS (NM_138748)	promoter-TSS (NM_138748)	274	NM_007760	12908	Mm.20396	NM_007760	ENSMUSG00000026853	Crat	AW107812|CARAT	carnitine acetyltransferase	protein-coding
95.6179	0.38408	0.348627	1.10169	0.270596	0.876295	Cx3cr1WT-Cx3cr1KO	chr8	85555359	85555672	+	1000	promoter-TSS (NM_019794)	promoter-TSS (NM_019794)	-244	NM_019794	56445	Mm.475573	NM_019794	ENSMUSG00000031701	Dnaja2	1500017M13Rik|2010206B19Rik|DNAJ|DNJ3|Dnaj3|HIRIP4|PRO3015|mDj3	DnaJ heat shock protein family (Hsp40) member A2	protein-coding
349.235	-0.0330353	0.228654	-0.144477	0.885124	0.993944	Cx3cr1WT-Cx3cr1KO	chr1	64532908	64533127	+	1000	5' UTR (NM_009952, exon 1 of 9)	5' UTR (NM_009952, exon 1 of 9)	213	NM_001037726	12912	Mm.422634	NM_009952	ENSMUSG00000025958	Creb1	2310001E10Rik|3526402H21Rik|AV083133|Creb|Creb-1	cAMP responsive element binding protein 1	protein-coding
271.325	0.107467	0.243765	0.440864	0.659312	0.972496	Cx3cr1WT-Cx3cr1KO	chr18	63692425	63692634	+	1000	promoter-TSS (NM_016792)	promoter-TSS (NM_016792)	-170	NM_016792	53382	Mm.19169	NM_016792	ENSMUSG00000024583	Txnl1	32kDa|TRP32|Txnl	thioredoxin-like 1	protein-coding
63.9752	-0.331113	0.354436	-0.934197	0.350202	0.902562	Cx3cr1WT-Cx3cr1KO	chr12	106010152	106010444	+	1000	promoter-TSS (NM_011705)	promoter-TSS (NM_011705)	35	NM_001029843	22367	Mm.2981	NM_011705	ENSMUSG00000021115	Vrk1	51PK	vaccinia related kinase 1	protein-coding
51.738	-0.680818	0.363111	-1.87496	0.0607986	0.600597	Cx3cr1WT-Cx3cr1KO	chr7	3290206	3290434	+	1000	promoter-TSS (NM_016969)	promoter-TSS (NM_016969)	-235	NM_016969	50918	Mm.29874	NM_016969	ENSMUSG00000068566	Myadm	D7Wsu62e	myeloid-associated differentiation marker	protein-coding
436.551	-0.0695442	0.218161	-0.318775	0.749897	0.982855	Cx3cr1WT-Cx3cr1KO	chr12	110696183	110696400	+	1000	5' UTR (NM_010480, exon 1 of 11)	5' UTR (NM_010480, exon 1 of 11)	104	NM_010480	15519	Mm.1843	NM_010480	ENSMUSG00000021270	Hsp90aa1	86kDa|89kDa|AL024080|AL024147|Hsp86-1|Hsp89|Hsp90|Hspca|hsp4	heat shock protein 90, alpha (cytosolic), class A member 1	protein-coding
29.1125	0.0233476	0.351338	0.0664535	0.947017	NA	Cx3cr1WT-Cx3cr1KO	chr17	28177517	28177722	+	1000	intron (NM_001357995, intron 1 of 13)	CpG	201	NM_172617	224656	Mm.267359	NM_172617	ENSMUSG00000024220	Zfp523	2810027J07|BC025615|Znf76	zinc finger protein 523	protein-coding
119.861	-0.182774	0.317525	-0.575621	0.564872	0.953728	Cx3cr1WT-Cx3cr1KO	chr7	30280462	30280804	+	1000	promoter-TSS (NM_146186)	promoter-TSS (NM_146186)	-212	NM_146186	233064	Mm.271677	NM_146186	ENSMUSG00000037020	Wdr62	2310038K02Rik|b2b1508Clo	WD repeat domain 62	protein-coding
258.764	0.134304	0.24957	0.538142	0.590479	0.958203	Cx3cr1WT-Cx3cr1KO	chr5	35728891	35729113	+	1000	5' UTR (NM_194344, exon 1 of 18)	5' UTR (NM_194344, exon 1 of 18)	274	NM_194344	231147	Mm.290429	NM_194344	ENSMUSG00000036553	Sh3tc1	4631428G15|BC024909	SH3 domain and tetratricopeptide repeats 1	protein-coding
103.01	-0.193713	0.327312	-0.591829	0.553965	0.952473	Cx3cr1WT-Cx3cr1KO	chr5	24100558	24100771	+	1000	promoter-TSS (NM_026448)	promoter-TSS (NM_026448)	74	NM_001161800	52323	Mm.273768	NM_026448	ENSMUSG00000028986	Klhl7	2700038B03Rik|D5Ertd363e|SBBI26	kelch-like 7	protein-coding
562.566	-0.413028	0.201894	-2.04577	0.0407793	0.537929	Cx3cr1WT-Cx3cr1KO	chr10	23787049	23787270	+	1000	promoter-TSS (NM_011295)	promoter-TSS (NM_011295)	50	NM_011295	20042	Mm.371846	NM_011295	ENSMUSG00000061983	Rps12	-	ribosomal protein S12	protein-coding
279.979	0.439914	0.249668	1.762	0.0780701	0.65489	Cx3cr1WT-Cx3cr1KO	chr1	88701958	88702182	+	1000	5' UTR (NM_177305, exon 1 of 1)	5' UTR (NM_177305, exon 1 of 1)	121	NM_177305	320982	Mm.27968	NM_177305	ENSMUSG00000049866	Arl4c	A630084M22Rik|Arl7|LAK	ADP-ribosylation factor-like 4C	protein-coding
45.035	0.0205803	0.362825	0.0567223	0.954766	NA	Cx3cr1WT-Cx3cr1KO	chr5	124095632	124095845	+	1000	promoter-TSS (NM_019875)	promoter-TSS (NM_019875)	60	NM_019875	56325	Mm.254839	NM_019875	ENSMUSG00000029408	Abcb9	TAPL|mKIAA1520	ATP-binding cassette, sub-family B (MDR/TAP), member 9	protein-coding
107.894	-0.0315599	0.333092	-0.0947481	0.924515	0.994647	Cx3cr1WT-Cx3cr1KO	chr8	57487957	57488188	+	1000	promoter-TSS (NM_021788)	promoter-TSS (NM_021788)	109	NR_126555	78353	Mm.426240	NR_126553	ENSMUSG00000096917	2500002B13Rik	-	RIKEN cDNA 2500002B13 gene	ncRNA
43.3836	0.800407	0.363595	2.20137	0.0277099	NA	Cx3cr1WT-Cx3cr1KO	chr17	32966082	32966370	+	1000	promoter-TSS (NR_033585)	promoter-TSS (NR_033585)	395	NM_153063	224691	Mm.328953	NM_153063	ENSMUSG00000053600	Zfp472	KRIM-1|Krim-1A|Krim-1B|Krim1	zinc finger protein 472	protein-coding
268.059	0.232832	0.260278	0.894551	0.371027	0.909567	Cx3cr1WT-Cx3cr1KO	chr17	35058965	35059251	+	1000	promoter-TSS (NM_001190449)	promoter-TSS (NM_001190449)	73	NM_016765	51793	Mm.1457	NM_016765	ENSMUSG00000007039	Ddah2	1110003M04Rik|AU019324|AW413173|DDAH-2|DDAHII|Ddah|G6a|NG30	dimethylarginine dimethylaminohydrolase 2	protein-coding
70.9582	0.0602382	0.347987	0.173105	0.862569	0.993944	Cx3cr1WT-Cx3cr1KO	chr2	180725145	180725447	+	1000	promoter-TSS (NM_183161)	promoter-TSS (NM_183161)	-43	NM_183161	228993	Mm.87189	NM_183161	ENSMUSG00000023393	Slc17a9	1700019H03Rik|BC019537|Vnut	solute carrier family 17, member 9	protein-coding
281.36	-0.299647	0.2568	-1.16685	0.243271	0.860364	Cx3cr1WT-Cx3cr1KO	chr9	48495158	48495509	+	1000	promoter-TSS (NM_001326356)	promoter-TSS (NM_001326356)	-3	NR_136937	67010	Mm.76911	NM_144948	ENSMUSG00000042396	Rbm7	1200007M24Rik|1500011D06Rik|AU041934|AW554393	RNA binding motif protein 7	protein-coding
83.8286	0.336513	0.34332	0.980173	0.327001	0.900571	Cx3cr1WT-Cx3cr1KO	chr1	92473765	92474070	+	1000	promoter-TSS (NM_024197)	promoter-TSS (NM_024197)	-159	NM_024197	67273	Mm.248778	NM_024197	ENSMUSG00000026260	Ndufa10	2900053E13Rik	NADH dehydrogenase (ubiquinone) 1 alpha subcomplex 10	protein-coding
228.648	0.336815	0.267326	1.25994	0.207691	0.844595	Cx3cr1WT-Cx3cr1KO	chr14	79515611	79515847	+	1000	promoter-TSS (NM_001286412)	promoter-TSS (NM_001286412)	55	NM_001286411	13709	Mm.20938	NM_007920	ENSMUSG00000036461	Elf1	Elf-1|Sts1|mElf-1|p70	E74-like factor 1	protein-coding
272.009	0.0275069	0.286555	0.0959918	0.923527	0.994647	Cx3cr1WT-Cx3cr1KO	chr2	164879312	164879531	+	1000	promoter-TSS (NM_146129)	promoter-TSS (NM_146129)	53	NM_146129	228866	Mm.241134	NM_146129	ENSMUSG00000039849	Pcif1	2310022K11Rik|C20orf67|F730014I05Rik	PDX1 C-terminal inhibiting factor 1	protein-coding
61.629	-0.0350353	0.363399	-0.09641	0.923195	0.994647	Cx3cr1WT-Cx3cr1KO	chr17	33781215	33781524	+	1000	exon (NM_020581, exon 1 of 7)	exon (NM_020581, exon 1 of 7)	206	NM_020581	57875	Mm.196189	NM_020581	ENSMUSG00000002289	Angptl4	Arp4|Bk89|Fiaf|Hfarp|Ng27|Pgar|Pgarg|Pp1158	angiopoietin-like 4	protein-coding
115.659	0.087444	0.328788	0.265958	0.790271	0.987674	Cx3cr1WT-Cx3cr1KO	chr5	41844327	41844585	+	1000	promoter-TSS (NM_001310601)	promoter-TSS (NM_001310601)	-141	NM_001081422	665775	Mm.158726	NM_001081422	ENSMUSG00000061755	Bod1l	A230054D04Rik|AI853319|FAM44A|mKIAA1327	biorientation of chromosomes in cell division 1-like	protein-coding
44.5939	0.00252455	0.363571	0.00694377	0.99446	NA	Cx3cr1WT-Cx3cr1KO	chr2	112266815	112267180	+	1000	exon (NM_133649, exon 1 of 25)	exon (NM_133649, exon 1 of 25)	683	NM_133649	107723	Mm.491155	NM_133648	ENSMUSG00000027130	Slc12a6	9530023I19Rik|KCC3|gaxp	solute carrier family 12, member 6	protein-coding
100.701	-0.273307	0.335234	-0.81527	0.414918	0.916121	Cx3cr1WT-Cx3cr1KO	chr10	50592431	50592664	+	1000	promoter-TSS (NM_198007)	promoter-TSS (NM_198007)	-122	NM_198007	77987	Mm.222497	NM_198007	ENSMUSG00000038774	Ascc3	ASC1p200|B630009I04Rik|BC023451|D430001L07Rik|D630041L21|Helic1|RNAH	activating signal cointegrator 1 complex subunit 3	protein-coding
227.887	-0.389322	0.264626	-1.47121	0.141233	0.770551	Cx3cr1WT-Cx3cr1KO	chr7	43312961	43313206	+	1000	5' UTR (NM_001357811, exon 1 of 5)	5' UTR (NM_001357811, exon 1 of 5)	217	NM_001357812	69930	Mm.45367	NM_027264	ENSMUSG00000012640	Zfp715	2610041B18Rik|mszf15	zinc finger protein 715	protein-coding
111.754	-0.0475357	0.348209	-0.136515	0.891414	0.993944	Cx3cr1WT-Cx3cr1KO	chr11	72207493	72207770	+	1000	promoter-TSS (NM_026559)	promoter-TSS (NM_026559)	77	NM_026559	52700	Mm.27670	NM_026559	ENSMUSG00000020803	Txndc17	4831443O22Rik|D11Ertd672e|TRP14|Txnl5	thioredoxin domain containing 17	protein-coding
40.2482	-0.0450594	0.185334	-0.243125	0.807908	NA	Cx3cr1WT-Cx3cr1KO	chr3	103802914	103803269	+	1000	promoter-TSS (NR_040412)	promoter-TSS (NR_040412)	-38	NR_040412	100503157	Mm.445554	NR_040412	ENSMUSG00000084997	Gm15471	-	predicted gene 15471	ncRNA
163.322	0.696197	0.306697	2.26998	0.0232085	0.457261	Cx3cr1WT-Cx3cr1KO	chr16	35022304	35022575	+	1000	promoter-TSS (NM_023587)	promoter-TSS (NM_023587)	18	NM_023587	70757	Mm.27286	NM_023587	ENSMUSG00000035376	Hacd2	6330408J20Rik|AI255777|AI481689|Hcad2|Ptplb	3-hydroxyacyl-CoA dehydratase 2	protein-coding
96.7384	0.325788	0.346503	0.940217	0.347106	0.902562	Cx3cr1WT-Cx3cr1KO	chr4	3574778	3575035	+	1000	promoter-TSS (NM_054089)	promoter-TSS (NM_054089)	27	NM_054089	116940	Mm.171323	NM_054089	ENSMUSG00000028233	Tgs1	D4Ertd800e|Ncoa6ip|Pimt	trimethylguanosine synthase 1	protein-coding
114.337	0.168189	0.315886	0.532437	0.594424	0.958203	Cx3cr1WT-Cx3cr1KO	chr9	21616357	21616740	+	1000	intron (NM_001357764, intron 1 of 34)	CpG	379	NM_001174078	20586	Mm.286593	NM_011417	ENSMUSG00000032187	Smarca4	BAF190A|Brg1|HP1-BP72|SNF2beta|SW1/SNF|b2b508.1Clo|b2b692Clo	SWI/SNF related, matrix associated, actin dependent regulator of chromatin, subfamily a, member 4	protein-coding
148.534	0.460645	0.328237	1.40339	0.1605	0.797046	Cx3cr1WT-Cx3cr1KO	chr3	84039757	84040143	+	1000	intron (NM_172681, intron 1 of 34)	CpG	211	NM_172681	229473	Mm.28838	NM_172681	ENSMUSG00000033767	Tmem131l	D930015E06Rik|Kiaa0922|mKIAA0922	transmembrane 131 like	protein-coding
269.35	-0.171755	0.245932	-0.698383	0.484938	0.931076	Cx3cr1WT-Cx3cr1KO	chr5	112276224	112276441	+	1000	promoter-TSS (NM_001326590)	promoter-TSS (NM_001326590)	-359	NM_001326590	22022	Mm.250631	NM_009419	ENSMUSG00000029344	Tpst2	AI448750|D5Ucla3|Tango13b|grm|grt	protein-tyrosine sulfotransferase 2	protein-coding
47.9234	0.0696323	0.361302	0.192726	0.847174	0.993188	Cx3cr1WT-Cx3cr1KO	chr1	92910503	92910778	+	1000	promoter-TSS (NR_138577)	promoter-TSS (NR_138577)	49	NR_138577	75995	Mm.46179	NR_138577	ENSMUSG00000097251	5033417F24Rik	6330419D11Rik	RIKEN cDNA 5033417F24 gene	ncRNA
77.2721	0.654475	0.349053	1.875	0.0607926	0.600597	Cx3cr1WT-Cx3cr1KO	chr3	40799792	40800025	+	1000	promoter-TSS (NM_173169)	promoter-TSS (NM_173169)	-43	NM_173169	20873	Mm.3794	NM_011495	ENSMUSG00000025758	Plk4	1700028H20|AI385771|Sak|Stk18	polo like kinase 4	protein-coding
182.815	0.0536759	0.277855	0.193179	0.846819	0.993188	Cx3cr1WT-Cx3cr1KO	chr7	80198294	80198583	+	1000	promoter-TSS (NM_001360135)	promoter-TSS (NM_001360135)	-3	NM_001360135	20352	Mm.275909	NM_013659	ENSMUSG00000030539	Sema4b	SemC|Semac|mKIAA1745	sema domain, immunoglobulin domain (Ig), transmembrane domain (TM) and short cytoplasmic domain, (semaphorin) 4B	protein-coding
59.0349	-0.193512	0.360496	-0.536796	0.591409	0.958203	Cx3cr1WT-Cx3cr1KO	chr7	24462412	24462639	+	1000	promoter-TSS (NM_011113)	promoter-TSS (NM_011113)	42	NM_011113	18793	Mm.1359	NM_011113	ENSMUSG00000046223	Plaur	Cd87|u-PAR|uPAR	plasminogen activator, urokinase receptor	protein-coding
84.762	0.278957	0.346992	0.80393	0.421438	0.919373	Cx3cr1WT-Cx3cr1KO	chr9	20898465	20898704	+	1000	promoter-TSS (NM_016876)	promoter-TSS (NM_016876)	6	NM_016876	53356	Mm.427309	NM_016876	ENSMUSG00000070319	Eif3g	44kDa|D0Jmb4|Eif3s4|TU-189B2|eIF3-p44|p44	eukaryotic translation initiation factor 3, subunit G	protein-coding
59.2177	0.262702	0.357649	0.734524	0.462629	0.931076	Cx3cr1WT-Cx3cr1KO	chr2	126875486	126875763	+	1000	intron (NM_001164325, intron 1 of 38)	intron (NM_001164325, intron 1 of 38)	637	NM_001164325	58800	Mm.244705	NM_021450	ENSMUSG00000027365	Trpm7	2310022G15Rik|4833414K03Rik|5033407O22Rik|CHAK|CHAK1|LTrpC-7|Ltpr7|Ltrpc7|TRPPLIK	transient receptor potential cation channel, subfamily M, member 7	protein-coding
86.1313	-0.165874	0.343378	-0.483066	0.629049	0.965402	Cx3cr1WT-Cx3cr1KO	chr4	63215321	63215571	+	1000	promoter-TSS (NM_025685)	promoter-TSS (NM_025685)	34	NM_025685	373864	Mm.194116	NM_025685	ENSMUSG00000045672	Col27a1	5730512J02Rik|AI449266	collagen, type XXVII, alpha 1	protein-coding
38.8336	0.534369	0.363604	1.46964	0.141658	NA	Cx3cr1WT-Cx3cr1KO	chr9	121381915	121382242	+	1000	promoter-TSS (NM_001357969)	promoter-TSS (NM_001357969)	-716	NM_001357970	67095	Mm.491112	NM_175114	ENSMUSG00000032536	Trak1	2310001H13Rik|AI413908|AI467545|hyrt|mKIAA1042	trafficking protein, kinesin binding 1	protein-coding
95.2647	-0.185688	0.338183	-0.549076	0.582953	0.956659	Cx3cr1WT-Cx3cr1KO	chr11	70687866	70688094	+	1000	TTS (NM_001252485)	TTS (NM_001252485)	125	NM_001190376	216874	Mm.473726	NM_178116	ENSMUSG00000040712	Camta2	Kiaa0909-hp|mKIAA0909	calmodulin binding transcription activator 2	protein-coding
96.8747	-0.238705	0.32878	-0.726032	0.467819	0.931076	Cx3cr1WT-Cx3cr1KO	chr15	85336285	85336553	+	1000	promoter-TSS (NM_016843)	promoter-TSS (NM_016843)	38	NM_016843	54138	Mm.248906	NM_016843	ENSMUSG00000016541	Atxn10	AI325283|C77170|E46|Sca10|TEG-169|Tex169	ataxin 10	protein-coding
105.601	0.0387595	0.329072	0.117784	0.906239	0.993944	Cx3cr1WT-Cx3cr1KO	chr17	32284576	32284931	+	1000	promoter-TSS (NM_198094)	promoter-TSS (NM_198094)	-620	NM_020508	57261	Mm.253518	NM_020508	ENSMUSG00000024002	Brd4	Brd5|HUNK1|MCAP|WI-11513	bromodomain containing 4	protein-coding
67.7006	0.340609	0.356472	0.955501	0.339324	0.902562	Cx3cr1WT-Cx3cr1KO	chr1	53313545	53313845	+	1000	promoter-TSS (NR_104361)	promoter-TSS (NR_104361)	71	NR_104360	72085	Mm.482256	NM_028091	ENSMUSG00000026096	Osgepl1	2610001M19Rik|AA416452	O-sialoglycoprotein endopeptidase-like 1	protein-coding
342.961	0.0300393	0.229937	0.130642	0.896059	0.993944	Cx3cr1WT-Cx3cr1KO	chr4	129624250	129624489	+	1000	promoter-TSS (NM_025455)	promoter-TSS (NM_025455)	-461	NM_025455	66264	Mm.383215	NM_025455	ENSMUSG00000028795	Ccdc28b	1110002E08Rik|1810010N17Rik	coiled coil domain containing 28B	protein-coding
238.369	-0.311654	0.279982	-1.11312	0.265656	0.873253	Cx3cr1WT-Cx3cr1KO	chr1	120121220	120121447	+	1000	promoter-TSS (NM_007830)	promoter-TSS (NM_007830)	146	NM_001172074	73103	Mm.271602	NM_028439	ENSMUSG00000026388	3110009E18Rik	-	RIKEN cDNA 3110009E18 gene	protein-coding
54.2239	-0.0882176	0.361973	-0.243713	0.807453	0.98788	Cx3cr1WT-Cx3cr1KO	chr9	65580468	65580669	+	1000	promoter-TSS (NM_153119)	promoter-TSS (NM_153119)	-481	NM_153119	102595	Mm.247303	NM_153119	ENSMUSG00000050721	Plekho2	AI840980|Plekhq1	pleckstrin homology domain containing, family O member 2	protein-coding
350.6	0.601709	0.244999	2.45597	0.0140506	0.391404	Cx3cr1WT-Cx3cr1KO	chr5	103753676	103753926	+	1000	promoter-TSS (NM_001080798)	promoter-TSS (NM_001080798)	-361	NM_133919	17355	Mm.6949	NM_133919	ENSMUSG00000029313	Aff1	9630032B01Rik|AW319193|Af4|Mllt2h|Rob	AF4/FMR2 family, member 1	protein-coding
126.996	0.0654827	0.310146	0.211135	0.832782	0.991565	Cx3cr1WT-Cx3cr1KO	chr4	16164021	16164251	+	1000	promoter-TSS (NM_001329751)	promoter-TSS (NM_001329751)	26	NR_045765	100415915	Mm.387180	NR_045765	ENSMUSG00000085112	A530072M11Rik	-	RIKEN cDNA gene A530072M11	ncRNA
170.583	0.262597	0.296461	0.885773	0.37574	0.912157	Cx3cr1WT-Cx3cr1KO	chr16	32419694	32419922	+	1000	non-coding (NR_154990, exon 1 of 4)	non-coding (NR_154990, exon 1 of 4)	106	NM_001347183	66061	Mm.302693	NM_025329	ENSMUSG00000014075	Tctex1d2	0610012D17Rik|2410011K15Rik	Tctex1 domain containing 2	protein-coding
75.2461	-0.204054	0.353752	-0.576827	0.564056	0.953728	Cx3cr1WT-Cx3cr1KO	chr2	32720970	32721241	+	1000	promoter-TSS (NR_045535)	promoter-TSS (NR_045535)	50	NM_013781	27387	Mm.9593	NM_013781	ENSMUSG00000059013	Sh2d3c	Chat|Nsp3|Shep1	SH2 domain containing 3C	protein-coding
74.7416	0.0547211	0.349627	0.156513	0.875629	0.993944	Cx3cr1WT-Cx3cr1KO	chr4	43046132	43046388	+	1000	promoter-TSS (NM_172691)	promoter-TSS (NM_172691)	-40	NM_172691	230088	Mm.260162	NM_172691	ENSMUSG00000036002	Fam214b	B230312A22Rik	family with sequence similarity 214, member B	protein-coding
77.8695	0.196298	0.352458	0.55694	0.577568	0.955217	Cx3cr1WT-Cx3cr1KO	chr4	151988810	151989082	+	1000	promoter-TSS (NM_001145929)	promoter-TSS (NM_001145929)	40	NM_175152	69876	Mm.226820	NM_175152	ENSMUSG00000039759	Thap3	2010013E08Rik|2210418H06Rik	THAP domain containing, apoptosis associated protein 3	protein-coding
83.2465	0.412261	0.343181	1.20129	0.229638	0.854106	Cx3cr1WT-Cx3cr1KO	chr11	5803251	5803573	+	1000	exon (NM_018870, exon 1 of 3)	exon (NM_018870, exon 1 of 3)	384	NM_018870	56012	Mm.219627	NM_018870	ENSMUSG00000020475	Pgam2	-	phosphoglycerate mutase 2	protein-coding
54.8197	0.101146	0.358355	0.282251	0.777751	0.986175	Cx3cr1WT-Cx3cr1KO	chrX	166440471	166440730	+	1000	promoter-TSS (NM_025432)	promoter-TSS (NM_025432)	104	NM_177429	237222	Mm.247480	NM_177429	ENSMUSG00000040586	Ofd1	Cxorf5|DXGgc7e|ORF2	OFD1, centriole and centriolar satellite protein	protein-coding
146.938	-0.430721	0.322915	-1.33385	0.182253	0.818828	Cx3cr1WT-Cx3cr1KO	chr11	90249051	90249252	+	1000	promoter-TSS (NM_026178)	promoter-TSS (NM_026178)	-325	NM_026178	67468	Mm.277518	NM_026178	ENSMUSG00000003948	Mmd	1200017E07Rik|1810073C06Rik|AA690185	monocyte to macrophage differentiation-associated	protein-coding
169.377	-0.247754	0.299153	-0.828183	0.407567	0.914739	Cx3cr1WT-Cx3cr1KO	chr12	113000804	113001033	+	1000	promoter-TSS (NM_028193)	promoter-TSS (NM_028193)	-297	NM_028193	72308	Mm.196721	NM_028193	ENSMUSG00000011158	Brf1	2510002F24Rik|GTF3B|TAF3C|TAFIII90|TFIIIB90|mTFIIIB90	BRF1, RNA polymerase III transcription initiation factor 90 kDa subunit	protein-coding
106.393	0.316476	0.324734	0.974572	0.329773	0.902562	Cx3cr1WT-Cx3cr1KO	chr3	98382400	98382681	+	1000	promoter-TSS (NM_172863)	promoter-TSS (NM_172863)	59	NM_172863	242109	Mm.358911	NM_172863	ENSMUSG00000050064	Zfp697	9430053K19|AI467503|Znf697	zinc finger protein 697	protein-coding
188.607	0.289843	0.278035	1.04247	0.297194	0.890055	Cx3cr1WT-Cx3cr1KO	chr14	20388893	20389154	+	1000	promoter-TSS (NM_134081)	promoter-TSS (NM_134081)	-113	NM_134081	108671	Mm.2871	NM_134081	ENSMUSG00000021811	Dnajc9	5330419I01Rik|AU020082	DnaJ heat shock protein family (Hsp40) member C9	protein-coding
91.686	0.452031	0.332381	1.35998	0.173837	0.814491	Cx3cr1WT-Cx3cr1KO	chr10	18055503	18055726	+	1000	promoter-TSS (NM_001111065)	promoter-TSS (NM_001111065)	-326	NM_009048	19707	Mm.4479	NM_009048	ENSMUSG00000019854	Reps1	BB161292	RalBP1 associated Eps domain containing protein	protein-coding
68.7677	0.60872	0.348349	1.74744	0.0805605	0.655764	Cx3cr1WT-Cx3cr1KO	chr12	98259098	98259358	+	1000	exon (NM_008079, exon 1 of 17)	exon (NM_008079, exon 1 of 17)	231	NM_008079	14420	Mm.5120	NM_008079	ENSMUSG00000021003	Galc	2310068B06Rik|A930008M05Rik|AW212969|AW413532|Gacy|twi|twitcher	galactosylceramidase	protein-coding
88.1417	0.495581	0.337819	1.467	0.142375	0.772068	Cx3cr1WT-Cx3cr1KO	chr11	71019827	71020033	+	1000	promoter-TSS (NM_001291147)	promoter-TSS (NM_001291147)	-89	NM_001291146	116891	Mm.28131	NM_033562	ENSMUSG00000018442	Derl2	CGI-101|Derlin-2|F-lana|Flana	Der1-like domain family, member 2	protein-coding
143.062	0.0372387	0.310669	0.119866	0.904589	0.993944	Cx3cr1WT-Cx3cr1KO	chr3	59210142	59210526	+	1000	exon (NM_028808, exon 2 of 2)	exon (NM_028808, exon 2 of 2)	548	NM_028808	74191	Mm.90067	NM_028808	ENSMUSG00000036362	P2ry13	2010001L06Rik|GPCR1|GPR94|Gpr86|P2Y13|P2yr13|SP174	purinergic receptor P2Y, G-protein coupled 13	protein-coding
221.947	0.0647422	0.269145	0.240547	0.809906	0.98788	Cx3cr1WT-Cx3cr1KO	chr1	172206529	172206774	+	1000	5' UTR (NM_001329869, exon 1 of 4)	5' UTR (NM_001329869, exon 1 of 4)	153	NM_001329871	18611	Mm.544	NM_011063	ENSMUSG00000013698	Pea15a	Mat1|PEA-15|Pea15|Pkcs15	phosphoprotein enriched in astrocytes 15A	protein-coding
31.0859	-0.254176	0.360508	-0.705049	0.48078	NA	Cx3cr1WT-Cx3cr1KO	chr17	24141924	24142270	+	1000	promoter-TSS (NM_011062)	promoter-TSS (NM_011062)	-503	NM_001080773	18607	Mm.10504	NM_011062	ENSMUSG00000024122	Pdpk1	Pdk1	3-phosphoinositide dependent protein kinase 1	protein-coding
93.2303	0.158229	0.33056	0.478671	0.632173	0.966928	Cx3cr1WT-Cx3cr1KO	chr15	75909157	75909378	+	1000	promoter-TSS (NM_001285430)	promoter-TSS (NM_001285430)	77	NM_001285433	66656	Mm.258927	NM_023240	ENSMUSG00000055762	Eef1d	EF-1-delta	eukaryotic translation elongation factor 1 delta (guanine nucleotide exchange protein)	protein-coding
125.006	-0.221052	0.31668	-0.69803	0.485159	0.931076	Cx3cr1WT-Cx3cr1KO	chrX	73228169	73228432	+	1000	promoter-TSS (NM_007978)	promoter-TSS (NM_007978)	-6	NM_007978	14070	Mm.165807	NM_007978	ENSMUSG00000078317	F8a	AI852759|DXUcsf1|F8a1	factor 8-associated gene A	protein-coding
57.7038	0.0800961	0.360784	0.222006	0.82431	0.990948	Cx3cr1WT-Cx3cr1KO	chr12	12262113	12262355	+	1000	promoter-TSS (NM_029758)	promoter-TSS (NM_029758)	95	NM_001146119	76820	Mm.440802	NM_029758	ENSMUSG00000020589	Fam49a	2410157M17Rik|9630047E15|D12Ertd553e	family with sequence similarity 49, member A	protein-coding
500.433	0.0998252	0.201379	0.495709	0.6201	0.962501	Cx3cr1WT-Cx3cr1KO	chr5	137629110	137629329	+	1000	promoter-TSS (NM_001168652)	promoter-TSS (NM_001168652)	96	NR_033148	100316903	Mm.200763	NR_033148		Gm20605	Lrch4-sap25	predicted gene 20605	ncRNA
27.8232	-0.13743	0.356798	-0.385176	0.700107	NA	Cx3cr1WT-Cx3cr1KO	chr1	166003426	166003649	+	1000	promoter-TSS (NM_011137)	promoter-TSS (NM_011137)	-903	NM_198932	18986	Mm.245261	NM_011137	ENSMUSG00000026565	Pou2f1	2810482H01Rik|NF-A1|Oct-1|Oct1|Otf-1|Otf1	POU domain, class 2, transcription factor 1	protein-coding
236.444	0.457366	0.266976	1.71313	0.0866879	0.665613	Cx3cr1WT-Cx3cr1KO	chr2	144011081	144011301	+	1000	promoter-TSS (NM_024281)	promoter-TSS (NM_024281)	72	NM_133626	81910	Mm.13705	NM_024281	ENSMUSG00000027422	Rrbp1	1700087N07Rik|5730465C04Rik|ES/130|mKIAA1398|mRRp0|mRRp1.8|mRRp10|mRRp15a|mRRp15b|mRRp16.8|mRRp2|mRRp41|mRRp47|mRRp5.4|p180	ribosome binding protein 1	protein-coding
302.49	0.0731741	0.230118	0.317986	0.750496	0.982855	Cx3cr1WT-Cx3cr1KO	chr9	61914416	61914818	+	1000	promoter-TSS (NM_018853)	promoter-TSS (NM_018853)	-107	NM_018853	56040	Mm.3158	NM_018853	ENSMUSG00000007892	Rplp1	2410042H16Rik|Arpp1|C430017H15Rik	ribosomal protein, large, P1	protein-coding
233.977	0.245373	0.260945	0.940325	0.347051	0.902562	Cx3cr1WT-Cx3cr1KO	chr1	172148072	172148296	+	1000	5' UTR (NM_001357204, exon 1 of 14)	5' UTR (NM_001357204, exon 1 of 14)	169	NM_001357204	98193	Mm.159915	NM_153555	ENSMUSG00000026554	Dcaf8	AA408877|AA433120|AA792214|AU018973|C76055|D1Dau35e|D1Ucla4|H326|Wdr42a	DDB1 and CUL4 associated factor 8	protein-coding
239.592	0.0096598	0.272034	0.0355095	0.971673	0.998197	Cx3cr1WT-Cx3cr1KO	chr2	24935002	24935235	+	1000	exon (NM_001162485, exon 1 of 8)	exon (NM_001162485, exon 1 of 8)	163	NR_027876	215705	Mm.45275	NM_178408	ENSMUSG00000026972	Arrdc1	AI957342|BC004091	arrestin domain containing 1	protein-coding
43.7511	-0.886488	0.363227	-2.44059	0.0146634	NA	Cx3cr1WT-Cx3cr1KO	chr4	148140157	148140367	+	1000	promoter-TSS (NM_027985)	promoter-TSS (NM_027985)	-228	NM_027985	71890	Mm.9648	NM_027985	ENSMUSG00000029003	Mad2l2	2310033C13Rik|G1-453-4|MAD2B|REV7|repro22	MAD2 mitotic arrest deficient-like 2	protein-coding
52.3796	0.691457	0.358818	1.92704	0.0539747	0.583576	Cx3cr1WT-Cx3cr1KO	chr13	23750990	23751255	+	1000	promoter-TSS (NM_175660)	promoter-TSS (NM_175660)	34	NM_175660	319172	Mm.423402	NM_175660	ENSMUSG00000061615	Hist1h2ab	H2A.1|H2a-53	histone cluster 1, H2ab	protein-coding
22.225	0.707698	0.332515	2.12832	0.0333105	NA	Cx3cr1WT-Cx3cr1KO	chr19	4942891	4943140	+	1000	promoter-TSS (NM_172835)	promoter-TSS (NM_172835)	77	NM_172835	240518	Mm.277580	NM_172835	ENSMUSG00000024901	Peli3	6030441F14Rik|A930011L17|BC028931	pellino 3	protein-coding
66.093	0.0798462	0.356272	0.224116	0.822667	0.990948	Cx3cr1WT-Cx3cr1KO	chr16	44139826	44140048	+	1000	promoter-TSS (NM_007508)	promoter-TSS (NM_007508)	128	NM_028108	72117	Mm.278726	NM_028108	ENSMUSG00000022698	Naa50	2600005K24Rik|2810441M03Rik|AW112078|Mak3|Mak3p|Nat13|Nat5|San	N(alpha)-acetyltransferase 50, NatE catalytic subunit	protein-coding
185.274	-0.130754	0.285718	-0.457634	0.647215	0.970357	Cx3cr1WT-Cx3cr1KO	chr14	20082927	20083212	+	1000	exon (NM_026209, exon 1 of 2)	exon (NM_026209, exon 1 of 2)	103	NM_026209	67509	Mm.292423	NM_026209	ENSMUSG00000045107	Saysd1	1810063B07Rik|4930488P03Rik	SAYSVFN motif domain containing 1	protein-coding
70.1337	0.219903	0.359831	0.611129	0.541114	0.948428	Cx3cr1WT-Cx3cr1KO	chr10	78465524	78465745	+	1000	promoter-TSS (NM_172134)	promoter-TSS (NM_172134)	-686	NM_172134	216134	Mm.206159	NM_172134	ENSMUSG00000032788	Pdxk	2310036D04Rik|AA119688|C77999	pyridoxal (pyridoxine, vitamin B6) kinase	protein-coding
84.2405	0.0640954	0.354318	0.180898	0.856448	0.993786	Cx3cr1WT-Cx3cr1KO	chr3	98339794	98340028	+	1000	promoter-TSS (NM_016966)	promoter-TSS (NM_016966)	58	NM_016966	236539	Mm.16898	NM_016966	ENSMUSG00000053398	Phgdh	3-PGDH|3PGDH|4930479N23|A10|PGAD|PGD|PGDH|SERA	3-phosphoglycerate dehydrogenase	protein-coding
63.4739	-0.25563	0.361291	-0.707546	0.479227	0.931076	Cx3cr1WT-Cx3cr1KO	chr7	19309899	19310104	+	1000	promoter-TSS (NM_008036)	promoter-TSS (NM_008036)	44	NM_008036	14282	Mm.248335	NM_008036	ENSMUSG00000003545	Fosb	-	FBJ osteosarcoma oncogene B	protein-coding
380.11	-0.064816	0.22011	-0.29447	0.768398	0.984237	Cx3cr1WT-Cx3cr1KO	chr8	122432723	122433029	+	1000	promoter-TSS (NM_007806)	promoter-TSS (NM_007806)	64	NM_001301284	13057	Mm.271671	NM_007806	ENSMUSG00000006519	Cyba	b558|nmf333|p22-phox|p22phox	cytochrome b-245, alpha polypeptide	protein-coding
151.908	0.117178	0.299251	0.391571	0.695375	0.978055	Cx3cr1WT-Cx3cr1KO	chr6	38433850	38434080	+	1000	promoter-TSS (NM_177185)	promoter-TSS (NM_177185)	40	NM_177185	320538	Mm.302831	NM_177185	ENSMUSG00000038538	Ubn2	2900060J04Rik|6030408G03Rik|BC060116|D130059P03Rik|mKIAA2030	ubinuclein 2	protein-coding
42.9843	-0.240242	0.363055	-0.661725	0.508148	NA	Cx3cr1WT-Cx3cr1KO	chr2	30363841	30364100	+	1000	promoter-TSS (NM_175392)	promoter-TSS (NM_175392)	-263	NM_001242407	108958	Mm.254974	NM_175392	ENSMUSG00000026858	Miga2	5730472N09Rik|AA408683|AI790341|C9orf54|Fam73b|R74766	mitoguardin 2	protein-coding
268.031	0.0237125	0.265432	0.0893357	0.928815	0.994985	Cx3cr1WT-Cx3cr1KO	chr17	23677298	23677525	+	1000	promoter-TSS (NM_013749)	promoter-TSS (NM_013749)	38	NM_001161746	27279	Mm.28518	NM_013749	ENSMUSG00000023905	Tnfrsf12a	AI255180|C87282|Fn14|HPIP|TWEAK-R|TweakR	tumor necrosis factor receptor superfamily, member 12a	protein-coding
33.5315	1.1607	0.361238	3.2131	0.00131309	NA	Cx3cr1WT-Cx3cr1KO	chr11	57645398	57645602	+	1000	promoter-TSS (NM_134189)	promoter-TSS (NM_134189)	58	NM_134189	171212	Mm.271670	NM_134189	ENSMUSG00000020520	Galnt10	AU018154|C330012K04Rik|GalNAc-T10|GalNAc-T9|Galnt9|ppGaNTase	polypeptide N-acetylgalactosaminyltransferase 10	protein-coding
43.8286	-0.0186684	0.363602	-0.051343	0.959052	NA	Cx3cr1WT-Cx3cr1KO	chr2	161108893	161109134	+	1000	promoter-TSS (NM_173368)	promoter-TSS (NM_173368)	73	NM_173368	71389	Mm.122738	NM_173368	ENSMUSG00000057133	Chd6	5430439G14Rik|6330406J24Rik|CHD-6	chromodomain helicase DNA binding protein 6	protein-coding
109.602	0.316495	0.32221	0.982263	0.32597	0.900571	Cx3cr1WT-Cx3cr1KO	chr1	170975905	170976127	+	1000	promoter-TSS (NM_010187)	promoter-TSS (NM_010187)	55	NM_010187	14130	Mm.425062	NM_010187	ENSMUSG00000026656	Fcgr2b	AI528646|CD32|F630109E10Rik|Fc[g]RII|FcgRII|Fcgr2|Fcgr2a|Fcr-2|Fcr-3|Ly-17|Ly-m20|LyM-1|Lym-1|fcRII	Fc receptor, IgG, low affinity IIb	protein-coding
140.207	0.193882	0.320846	0.604283	0.545655	0.949794	Cx3cr1WT-Cx3cr1KO	chrX	73716649	73716923	+	1000	promoter-TSS (NM_012060)	promoter-TSS (NM_012060)	189	NM_007435	11666	Mm.365	NM_007435	ENSMUSG00000031378	Abcd1	ALDP|Ald|Aldgh	ATP-binding cassette, sub-family D (ALD), member 1	protein-coding
54.9417	-0.294459	0.363585	-0.809877	0.418011	0.918386	Cx3cr1WT-Cx3cr1KO	chr11	116077556	116077768	+	1000	TTS (NM_001347642)	TTS (NM_001347642)	299	NM_001009573	70450	Mm.259460	NM_001009573	ENSMUSG00000057948	Unc13d	2610108D09Rik|Jinx|Munc13-4|mFLJ00067	unc-13 homolog D (C. elegans)	protein-coding
71.8013	-0.0975072	0.352873	-0.276324	0.782299	0.986928	Cx3cr1WT-Cx3cr1KO	chr9	43239683	43239951	+	1000	promoter-TSS (NM_178644)	promoter-TSS (NM_178644)	-1	NM_178644	102644	Mm.246479	NM_178644	ENSMUSG00000032014	Oaf	AL024221|D130038B21Rik|D9Ucla1	out at first homolog	protein-coding
133.795	0.70586	0.313618	2.2507	0.0244045	0.461462	Cx3cr1WT-Cx3cr1KO	chr6	72439817	72440133	+	1000	promoter-TSS (NM_145569)	promoter-TSS (NM_145569)	-417	NM_145569	232087	Mm.29815	NM_145569	ENSMUSG00000053907	Mat2a	D630045P18Rik	methionine adenosyltransferase II, alpha	protein-coding
44.8547	-1.04873	0.363229	-2.88725	0.00388623	NA	Cx3cr1WT-Cx3cr1KO	chr17	34972289	34972534	+	1000	promoter-TSS (NM_013558)	promoter-TSS (NM_013558)	-255	NM_010479	193740	Mm.6388	NM_010479	ENSMUSG00000091971	Hspa1a	Hsp70-3|Hsp70.3|Hsp72|hsp68|hsp70A1	heat shock protein 1A	protein-coding
112.657	0.405145	0.331983	1.22038	0.222321	0.854106	Cx3cr1WT-Cx3cr1KO	chr9	119322837	119323050	+	1000	promoter-TSS (NR_045693)	promoter-TSS (NR_045693)	-516	NM_133985	108737	Mm.293565	NM_133985	ENSMUSG00000036737	Oxsr1	2210022N24Rik|2810422B09Rik|AI462649|AW209236|Osr1|mKIAA1101	oxidative-stress responsive 1	protein-coding
89.1798	0.0858809	0.333576	0.257455	0.796827	0.98788	Cx3cr1WT-Cx3cr1KO	chr7	15922209	15922439	+	1000	promoter-TSS (NM_009156)	promoter-TSS (NM_009156)	47	NM_009156	20364	Mm.42829	NM_009156	ENSMUSG00000041571	Selenow	Sepw1|selW	selenoprotein W	protein-coding
90.8426	-0.700398	0.343609	-2.03836	0.0415138	0.537929	Cx3cr1WT-Cx3cr1KO	chr8	109608431	109608721	+	1000	promoter-TSS (NM_020046)	promoter-TSS (NM_020046)	97	NM_020046	56749	Mm.23894	NM_020046	ENSMUSG00000031730	Dhodh	2810417D19Rik|AI834883	dihydroorotate dehydrogenase	protein-coding
100.245	-0.0718015	0.32751	-0.219234	0.826468	0.990948	Cx3cr1WT-Cx3cr1KO	chr5	36465091	36465310	+	1000	promoter-TSS (NM_024478)	promoter-TSS (NM_024478)	15	NM_024478	17713	Mm.21535	NM_024478	ENSMUSG00000029198	Grpel1	AA408748|mt-GrpE#1|mt-Grpel1	GrpE-like 1, mitochondrial	protein-coding
124.716	-0.226336	0.312991	-0.72314	0.469594	0.931076	Cx3cr1WT-Cx3cr1KO	chr11	4236270	4236576	+	1000	promoter-TSS (NM_001013365)	promoter-TSS (NM_001013365)	-362	NM_001013365	18413	Mm.131422	NM_001013365	ENSMUSG00000058755	Osm	OncoM	oncostatin M	protein-coding
63.7371	-0.128757	0.353851	-0.363873	0.715953	0.981327	Cx3cr1WT-Cx3cr1KO	chr16	4719325	4719524	+	1000	promoter-TSS (NM_001290761)	promoter-TSS (NM_001290761)	-68	NM_001290761	67824	Mm.28451	NM_026393	ENSMUSG00000063445	Nmral1	1110025F24Rik|AI256624	NmrA-like family domain containing 1	protein-coding
99.6206	0.139099	0.336759	0.413053	0.679568	0.9758	Cx3cr1WT-Cx3cr1KO	chr2	60125557	60125869	+	1000	promoter-TSS (NM_001001182)	promoter-TSS (NM_001001182)	27	NM_001001182	407823	Mm.228071	NM_001001182	ENSMUSG00000026987	Baz2b	5830435C13Rik|BC053917|D2Ertd794e	bromodomain adjacent to zinc finger domain, 2B	protein-coding
78.7476	0.0632019	0.341002	0.185342	0.852961	0.993413	Cx3cr1WT-Cx3cr1KO	chr7	144914880	144915095	+	1000	promoter-TSS (NM_001347537)	promoter-TSS (NM_001347537)	-113	NM_001357868	72284	Mm.273049	NM_028184	ENSMUSG00000031072	Oraov1	2210010N10Rik|TAOS1	oral cancer overexpressed 1	protein-coding
44.4665	-0.18411	0.360543	-0.510646	0.609599	NA	Cx3cr1WT-Cx3cr1KO	chr8	94179684	94179954	+	1000	intron (NM_013602, intron 1 of 2)	intron (NM_013602, intron 1 of 2)	730	NM_013602	17748	Mm.192991	NM_013602	ENSMUSG00000031765	Mt1	MT-I|Mt-1	metallothionein 1	protein-coding
112.787	-0.0731219	0.330558	-0.221208	0.824931	0.990948	Cx3cr1WT-Cx3cr1KO	chr19	12796445	12796677	+	1000	promoter-TSS (NR_024093)	promoter-TSS (NR_024093)	368	NM_001361971	107321	Mm.313136	NM_134152	ENSMUSG00000024696	Lpxn	4933402K05Rik|A530083L21Rik|AV278559|LDPL	leupaxin	protein-coding
137.066	-0.388417	0.303003	-1.28189	0.199881	0.836326	Cx3cr1WT-Cx3cr1KO	chr15	80254875	80255087	+	1000	promoter-TSS (NM_001287180)	promoter-TSS (NM_001287180)	-203	NM_001287180	11911	Mm.641	NM_009716	ENSMUSG00000042406	Atf4	Atf-4|C/ATF|CREB2|TAXREB67	activating transcription factor 4	protein-coding
39.7005	-0.533698	0.363149	-1.46964	0.14166	NA	Cx3cr1WT-Cx3cr1KO	chr14	27508362	27508574	+	1000	promoter-TSS (NM_177111)	promoter-TSS (NM_177111)	-8	NM_177111	320234	Mm.247767	NM_177111	ENSMUSG00000046753	Ccdc66	E230015L20Rik	coiled-coil domain containing 66	protein-coding
25.9624	-0.607292	0.356444	-1.70375	0.0884275	NA	Cx3cr1WT-Cx3cr1KO	chr1	90998472	90998685	+	1000	promoter-TSS (NM_001111312)	promoter-TSS (NM_001111312)	-149	NM_001111312	16978	Mm.45039	NM_008515	ENSMUSG00000026305	Lrrfip1	AU024550|Fliiap1	leucine rich repeat (in FLII) interacting protein 1	protein-coding
69.0557	0.0322194	0.359983	0.0895024	0.928683	0.994985	Cx3cr1WT-Cx3cr1KO	chr5	136962047	136962361	+	1000	exon (NM_025562, exon 1 of 5)	exon (NM_025562, exon 1 of 5)	127	NM_025562	66437	Mm.25849	NM_025562	ENSMUSG00000019054	Fis1	2010003O14Rik|Ttc11	fission, mitochondrial 1	protein-coding
200.42	-0.154059	0.270407	-0.569729	0.568862	0.953728	Cx3cr1WT-Cx3cr1KO	chr19	8941853	8942103	+	1000	promoter-TSS (NM_011842)	promoter-TSS (NM_011842)	58	NM_011842	23942	Mm.25339	NM_011842	ENSMUSG00000071646	Mta2	AW550797|Mata1l1|Mta1l1|mmta2	metastasis-associated gene family, member 2	protein-coding
175.837	0.0470015	0.313647	0.149855	0.880879	0.993944	Cx3cr1WT-Cx3cr1KO	chr16	15637810	15638074	+	1000	promoter-TSS (NM_011159)	promoter-TSS (NM_011159)	76	NM_011159	19090	Mm.71	NM_011159	ENSMUSG00000022672	Prkdc	AI326420|AU019811|DNA-PKcs|DNAPDcs|DNAPK|DNPK1|DOXNPH|HYRC1|XRCC7|dxnph|p460|scid|slip	protein kinase, DNA activated, catalytic polypeptide	protein-coding
443.333	0.260123	0.23664	1.09924	0.271664	0.876295	Cx3cr1WT-Cx3cr1KO	chr11	6415775	6416022	+	1000	promoter-TSS (NM_008907)	promoter-TSS (NM_008907)	28	NM_008907	268373	Mm.5246	NM_008907	ENSMUSG00000071866	Ppia	2700098C05|Cphn|CyP-18|CypA	peptidylprolyl isomerase A	protein-coding
59.3522	-0.29811	0.360969	-0.825861	0.408883	0.914739	Cx3cr1WT-Cx3cr1KO	chr5	31193876	31194152	+	1000	promoter-TSS (NM_001127355)	promoter-TSS (NM_001127355)	710	NM_153680	266781	Mm.6118	NM_153680	ENSMUSG00000029146	Snx17	5830447M19Rik|AI790646|D5Ertd260e|b2b1625.1Clo|mKIAA0064	sorting nexin 17	protein-coding
38.0114	-0.261847	0.363511	-0.720329	0.471323	NA	Cx3cr1WT-Cx3cr1KO	chr9	106438183	106438390	+	1000	promoter-TSS (NM_001276442)	promoter-TSS (NM_001276442)	-50	NM_025371	109652	Mm.7165	NM_025371	ENSMUSG00000023262	Acy1	1110014J22Rik|Acy-1	aminoacylase 1	protein-coding
187.815	-0.250623	0.281361	-0.89075	0.373063	0.909815	Cx3cr1WT-Cx3cr1KO	chr1	133131205	133131461	+	1000	5' UTR (NM_133819, exon 1 of 2)	5' UTR (NM_133819, exon 1 of 2)	167	NM_133819	108954	Mm.293628	NM_133819	ENSMUSG00000046062	Ppp1r15b	1810033K10Rik|AI606441|C530022L24Rik|CReP	protein phosphatase 1, regulatory (inhibitor) subunit 15b	protein-coding
130.006	-0.124314	0.313579	-0.396437	0.691783	0.977385	Cx3cr1WT-Cx3cr1KO	chr8	79294603	79294803	+	1000	promoter-TSS (NR_045822)	promoter-TSS (NR_045822)	253	NM_133823	109136	Mm.26510	NM_133823	ENSMUSG00000037022	Mmaa	2810018E08Rik|AI840684	methylmalonic aciduria (cobalamin deficiency) type A	protein-coding
165.522	0.392853	0.29019	1.35378	0.175807	0.814491	Cx3cr1WT-Cx3cr1KO	chr9	56417915	56418143	+	1000	promoter-TSS (NM_025812)	promoter-TSS (NM_025812)	21	NM_172924	244895	Mm.490331	NM_172924	ENSMUSG00000074305	Peak1	1110049L02Rik|9530046P14|AA690169|BE132841|C230081A13Rik|SGK269|mKIAA2002	pseudopodium-enriched atypical kinase 1	protein-coding
198.811	-0.331102	0.284772	-1.16269	0.244956	0.860364	Cx3cr1WT-Cx3cr1KO	chr7	4136975	4137211	+	1000	promoter-TSS (NR_033548)	promoter-TSS (NR_033548)	37	NM_172736	232798	Mm.22831	NM_172736	ENSMUSG00000035545	Leng8	AW049671	leukocyte receptor cluster (LRC) member 8	protein-coding
1313.46	-0.167105	0.13772	-1.21337	0.224989	0.854106	Cx3cr1WT-Cx3cr1KO	chr11	116024328	116024559	+	1000	promoter-TSS (NM_008211)	promoter-TSS (NM_008211)	61	NM_008211	15081	Mm.18516	NM_008211	ENSMUSG00000016559	H3f3b	9430068D06Rik|H3.3B	H3 histone, family 3B	protein-coding
51.6454	0.14961	0.358734	0.417051	0.676641	0.9758	Cx3cr1WT-Cx3cr1KO	chr18	74216133	74216332	+	1000	promoter-TSS (NM_028868)	promoter-TSS (NM_028868)	20	NM_028868	74322	Mm.17537	NM_028868	ENSMUSG00000024560	Cxxc1	2410002I16Rik|5830420C16Rik|AI426635|Cfp1|Cgbp|PHF18	CXXC finger 1 (PHD domain)	protein-coding
120.151	-0.166199	0.318797	-0.521331	0.602136	0.958557	Cx3cr1WT-Cx3cr1KO	chr7	45741778	45742048	+	1000	intron (NM_001360784, intron 1 of 5)	intron (NM_001360784, intron 1 of 5)	565	NM_001360784	54200	Mm.271634	NM_017465	ENSMUSG00000003271	Sult2b1	AI326997|BB173635|ST2B1|SULT2B	sulfotransferase family, cytosolic, 2B, member 1	protein-coding
26.0997	-0.243648	0.357465	-0.6816	0.495492	NA	Cx3cr1WT-Cx3cr1KO	chr4	118359947	118360143	+	1000	promoter-TSS (NM_026601)	promoter-TSS (NM_026601)	46	NR_003946	68180	Mm.193212	NM_026601	ENSMUSG00000006395	Hyi	2700033B16Rik|6430559E15Rik|HT036	hydroxypyruvate isomerase (putative)	protein-coding
87.1043	0.00805931	0.343816	0.0234407	0.981299	0.998197	Cx3cr1WT-Cx3cr1KO	chr7	35555316	35555567	+	1000	exon (NM_033080, exon 1 of 3)	exon (NM_033080, exon 1 of 3)	487	NM_033080	110959	Mm.410206	NM_033080	ENSMUSG00000034875	Nudt19	D7Rp2|D7Rp2-r|D7Rp2-s|D7Rp2e|RP2-r|RP2-s	nudix (nucleoside diphosphate linked moiety X)-type motif 19	protein-coding
208.641	0.154972	0.26814	0.577952	0.563296	0.953728	Cx3cr1WT-Cx3cr1KO	chr4	141538771	141539051	+	1000	promoter-TSS (NM_019763)	promoter-TSS (NM_019763)	-314	NM_019763	56381	Mm.299906	NM_019763	ENSMUSG00000040761	Spen	Mint|mKIAA0929	spen family transcription repressor	protein-coding
67.052	0.249556	0.349693	0.713642	0.475449	0.931076	Cx3cr1WT-Cx3cr1KO	chr17	25273079	25273429	+	1000	promoter-TSS (NR_027452)	promoter-TSS (NR_027452)	177	NM_001177610	22196	Mm.240044	NM_011665	ENSMUSG00000015120	Ube2i	5830467E05Rik|UBC9|Ubce2i|Ubce9	ubiquitin-conjugating enzyme E2I	protein-coding
71.2591	0.120665	0.347499	0.347239	0.728412	0.981655	Cx3cr1WT-Cx3cr1KO	chr11	70764146	70764476	+	1000	promoter-TSS (NM_177565)	promoter-TSS (NM_177565)	-136	NM_177565	193043	Mm.40966	NM_177565	ENSMUSG00000043602	Zfp3	AI854635|B230309J24|Fnp-1|Zfp-3	zinc finger protein 3	protein-coding
182.135	-0.231178	0.276397	-0.836398	0.402931	0.914739	Cx3cr1WT-Cx3cr1KO	chr2	136891523	136891761	+	1000	promoter-TSS (NM_001141946)	promoter-TSS (NM_001141946)	48	NM_001355670	74243	Mm.330612	NM_028201	ENSMUSG00000027281	Slx4ip	2210009G21Rik|2410004I22Rik|C85661|Slxip	SLX4 interacting protein	protein-coding
296.724	0.0658873	0.245578	0.268295	0.788472	0.987403	Cx3cr1WT-Cx3cr1KO	chr2	25224516	25224728	+	1000	promoter-TSS (NM_146116)	promoter-TSS (NM_146116)	80	NM_146116	227613	Mm.227260	NM_146116	ENSMUSG00000036752	Tubb4b	4930542G03Rik|Tubb2c|Tubb2c1	tubulin, beta 4B class IVB	protein-coding
86.0083	-0.038477	0.33897	-0.113511	0.909625	0.993944	Cx3cr1WT-Cx3cr1KO	chr12	32820380	32820631	+	1000	5' UTR (NM_021524, exon 1 of 11)	5' UTR (NM_021524, exon 1 of 11)	170	NM_021524	59027	Mm.202727	NM_021524	ENSMUSG00000020572	Nampt	1110035O14Rik|AI314458|AI480535|NAmPRTase|Pbef|Pbef1|Visfatin	nicotinamide phosphoribosyltransferase	protein-coding
42.1495	0.123819	0.363045	0.341057	0.733061	NA	Cx3cr1WT-Cx3cr1KO	chr7	44896033	44896243	+	1000	promoter-TSS (NM_027376)	promoter-TSS (NM_027376)	59	NM_027376	70300	Mm.276298	NM_027376	ENSMUSG00000011658	Fuz	2600013E07Rik|b2b1273Clo	fuzzy planar cell polarity protein	protein-coding
69.6888	-0.411505	0.353247	-1.16492	0.244051	0.860364	Cx3cr1WT-Cx3cr1KO	chr4	53158827	53159049	+	1000	intron (NM_013454, intron 1 of 49)	intron (NM_013454, intron 1 of 49)	957	NM_013454	11303	Mm.277376	NM_013454	ENSMUSG00000015243	Abca1	ABC-1|Abc1	ATP-binding cassette, sub-family A (ABC1), member 1	protein-coding
22.8578	-0.184936	0.351415	-0.52626	0.598707	NA	Cx3cr1WT-Cx3cr1KO	chr7	19272411	19272656	+	1000	promoter-TSS (NM_001282021)	promoter-TSS (NM_001282021)	-679	NM_001282022	22323	Mm.9684	NM_009499	ENSMUSG00000030403	Vasp	-	vasodilator-stimulated phosphoprotein	protein-coding
57.5259	-0.250863	0.360885	-0.695134	0.486972	0.931515	Cx3cr1WT-Cx3cr1KO	chr12	55079972	55080191	+	1000	promoter-TSS (NM_028314)	promoter-TSS (NM_028314)	29	NR_030764	72658	Mm.434380	NM_028314	ENSMUSG00000062198	2700097O09Rik	AW552125	RIKEN cDNA 2700097O09 gene	protein-coding
118.438	-0.0625829	0.312896	-0.200012	0.841471	0.992388	Cx3cr1WT-Cx3cr1KO	chr9	41157604	41157870	+	1000	5' UTR (NM_176860, exon 1 of 14)	5' UTR (NM_176860, exon 1 of 14)	325	NM_176860	72828	Mm.133615	NM_176860	ENSMUSG00000032020	Ubash3b	2810457I06Rik|BB125008|STS-1|TULA-2|p70	ubiquitin associated and SH3 domain containing, B	protein-coding
114.067	-0.100915	0.322904	-0.312524	0.754642	0.983463	Cx3cr1WT-Cx3cr1KO	chr8	31111730	31112010	+	1000	promoter-TSS (NM_175136)	promoter-TSS (NM_175136)	24	NM_175136	68867	Mm.29532	NM_175136	ENSMUSG00000039328	Rnf122	1110063C11Rik	ring finger protein 122	protein-coding
205.531	0.160363	0.273347	0.586667	0.557427	0.952473	Cx3cr1WT-Cx3cr1KO	chr11	20741380	20741613	+	1000	promoter-TSS (NM_001290545)	promoter-TSS (NM_001290545)	60	NM_001290545	216549	Mm.356580	NM_181411	ENSMUSG00000049659	Aftph	-	aftiphilin	protein-coding
59.6954	0.018211	0.356714	0.051052	0.959284	0.998197	Cx3cr1WT-Cx3cr1KO	chr11	107028143	107028341	+	1000	promoter-TSS (NM_001163473)	promoter-TSS (NM_001163473)	19	NM_001163473	69066	Mm.40679	NM_001163473	ENSMUSG00000078607	1810010H24Rik	-	RIKEN cDNA 1810010H24 gene	protein-coding
109.575	-0.00848917	0.320519	-0.0264857	0.97887	0.998197	Cx3cr1WT-Cx3cr1KO	chr11	84818640	84819065	+	1000	exon (NM_145433, exon 1 of 5)	exon (NM_145433, exon 1 of 5)	663	NM_145433	217038	Mm.280825	NM_145433	ENSMUSG00000018405	Mrm1	A530065E19Rik	mitochondrial rRNA methyltransferase 1	protein-coding
58.6875	0.0837202	0.356821	0.234628	0.814497	0.989569	Cx3cr1WT-Cx3cr1KO	chr19	53944813	53945037	+	1000	promoter-TSS (NM_001195338)	promoter-TSS (NM_001195338)	49	NM_019658	56392	Mm.228669	NM_019658	ENSMUSG00000024976	Shoc2	AU017287|Sur8|mKIAA0862	soc-2 (suppressor of clear) homolog (C. elegans)	protein-coding
92.9781	0.650511	0.335671	1.93794	0.0526302	0.578932	Cx3cr1WT-Cx3cr1KO	chr16	77013693	77013923	+	1000	promoter-TSS (NM_013918)	promoter-TSS (NM_013918)	-261	NM_013918	30940	Mm.40986	NM_013918	ENSMUSG00000022867	Usp25	-	ubiquitin specific peptidase 25	protein-coding
136.888	0.49373	0.300252	1.64438	0.100097	0.702585	Cx3cr1WT-Cx3cr1KO	chr8	83699220	83699445	+	1000	promoter-TSS (NM_177262)	promoter-TSS (NM_177262)	-153	NM_177262	320795	Mm.213000	NM_177262	ENSMUSG00000057672	Pkn1	DBK|F730027O18Rik|PAK1|PRK1|Pkn|Prkcl1|Stk3	protein kinase N1	protein-coding
96.8329	-0.0871836	0.329338	-0.264724	0.791222	0.987674	Cx3cr1WT-Cx3cr1KO	chr6	11907815	11908050	+	1000	promoter-TSS (NM_010886)	promoter-TSS (NM_010886)	103	NM_001362123	75725	Mm.212411	NM_029404	ENSMUSG00000029629	Phf14	1110001C23Rik|4932409F11Rik|5730446A07Rik|AA623952|AV297001|mKIAA0783	PHD finger protein 14	protein-coding
45.3263	-0.433725	0.363611	-1.19283	0.232938	NA	Cx3cr1WT-Cx3cr1KO	chr17	57031377	57031573	+	1000	promoter-TSS (NM_010613)	promoter-TSS (NM_010613)	32	NM_010613	16549	Mm.34296	NM_010613	ENSMUSG00000007670	Khsrp	6330409F21Rik|Fbp2|Fubp2|Ksrp	KH-type splicing regulatory protein	protein-coding
113.407	-0.958695	0.331898	-2.88853	0.00387052	0.254202	Cx3cr1WT-Cx3cr1KO	chr9	65021767	65021969	+	1000	promoter-TSS (NM_021345)	promoter-TSS (NM_021345)	-151	NM_021345	57874	Mm.308180	NM_021345	ENSMUSG00000033629	Hacd3	4930523M17Rik|AW742319|B-ind1|Hcad3|Hspc121|Ptplad1	3-hydroxyacyl-CoA dehydratase 3	protein-coding
62.2899	-0.214845	0.353874	-0.607124	0.543769	0.949794	Cx3cr1WT-Cx3cr1KO	chr13	59674827	59675137	+	1000	5' UTR (NM_027307, exon 2 of 11)	5' UTR (NM_027307, exon 2 of 11)	802	NM_001035122	105348	Mm.171335	NM_027307	ENSMUSG00000021556	Golm1	2310001L02Rik|AW125446|D030064E01Rik|GP73|Golph2|PSEC0257	golgi membrane protein 1	protein-coding
43.8931	0.866512	0.363618	2.38303	0.0171709	NA	Cx3cr1WT-Cx3cr1KO	chr10	67285138	67285352	+	1000	promoter-TSS (NM_001036293)	promoter-TSS (NM_001036293)	36	NM_001036293	641340	Mm.136223	NM_001036293	ENSMUSG00000075000	Nrbf2	NRBF-2	nuclear receptor binding factor 2	protein-coding
197.523	0.181434	0.273072	0.664417	0.506423	0.940296	Cx3cr1WT-Cx3cr1KO	chr5	136171473	136171714	+	1000	promoter-TSS (NM_178751)	promoter-TSS (NM_178751)	-937	NM_178751	269717	Mm.308396	NM_178751	ENSMUSG00000039747	Orai2	A730041O15Rik|Tmem142b	ORAI calcium release-activated calcium modulator 2	protein-coding
149.688	-0.195593	0.312819	-0.625259	0.531801	0.947185	Cx3cr1WT-Cx3cr1KO	chr4	129335737	129336123	+	1000	promoter-TSS (NM_025970)	promoter-TSS (NM_025970)	-96	NM_025970	67106	Mm.36575	NM_025970	ENSMUSG00000057572	Zbtb8os	2010001H09Rik|2310028N13Rik|AI851226|Arch|Archm	zinc finger and BTB domain containing 8 opposite strand	protein-coding
97.4777	-0.510196	0.346313	-1.47322	0.140692	0.77014	Cx3cr1WT-Cx3cr1KO	chr13	75839844	75840067	+	1000	promoter-TSS (NM_001360151)	promoter-TSS (NM_001360151)	69	NM_053108	93692	Mm.25844	NM_053108	ENSMUSG00000021591	Glrx	C86710|D13Wsu156e|Glrx1|Grx1|TTase	glutaredoxin	protein-coding
39.6412	-0.610716	0.362898	-1.68288	0.0923975	NA	Cx3cr1WT-Cx3cr1KO	chr11	53423094	53423375	+	1000	promoter-TSS (NM_153069)	promoter-TSS (NM_153069)	-98	NM_153069	259301	Mm.24283	NM_153069	ENSMUSG00000036216	Leap2	leap-2	liver-expressed antimicrobial peptide 2	protein-coding
147.833	-0.0696781	0.308415	-0.225923	0.821261	0.990562	Cx3cr1WT-Cx3cr1KO	chr15	80091066	80091277	+	1000	promoter-TSS (NM_009303)	promoter-TSS (NM_009303)	-163	NM_009303	20972	Mm.230301	NM_009303	ENSMUSG00000022415	Syngr1	R75468|Syngr1b|p29	synaptogyrin 1	protein-coding
132.414	0.0430717	0.308565	0.139587	0.888986	0.993944	Cx3cr1WT-Cx3cr1KO	chr8	36249534	36249785	+	1000	promoter-TSS (NM_001081150)	promoter-TSS (NM_001081150)	-143	NM_001081150	244421	Mm.324032	NM_001081150	ENSMUSG00000039633	Lonrf1	-	LON peptidase N-terminal domain and ring finger 1	protein-coding
176.78	0.728792	0.277824	2.62322	0.00871032	0.321565	Cx3cr1WT-Cx3cr1KO	chr2	30286229	30286567	+	1000	promoter-TSS (NM_177648)	promoter-TSS (NM_177648)	-35	NM_198304	227699	Mm.330119	NM_198304	ENSMUSG00000052533	Nup188	BC025526|U89435|mKIAA0169	nucleoporin 188	protein-coding
94.0969	-0.204162	0.337076	-0.605687	0.544723	0.949794	Cx3cr1WT-Cx3cr1KO	chr8	105565898	105566117	+	1000	promoter-TSS (NM_013477)	promoter-TSS (NM_013477)	57	NM_013477	11972	Mm.17708	NM_013477	ENSMUSG00000013160	Atp6v0d1	AI267038|Ac39|Atp6d|P39|VATX|Vma6	ATPase, H+ transporting, lysosomal V0 subunit D1	protein-coding
61.3397	0.161695	0.359589	0.449665	0.652952	0.971379	Cx3cr1WT-Cx3cr1KO	chr7	116504302	116504544	+	1000	promoter-TSS (NM_001130479)	promoter-TSS (NM_001130479)	54	NM_001360375	53322	Mm.9901	NM_016773	ENSMUSG00000030659	Nucb2	AI607786|Calnuc|Nefa|Nesfatin-1	nucleobindin 2	protein-coding
150.154	-0.182682	0.304746	-0.599458	0.548868	0.949981	Cx3cr1WT-Cx3cr1KO	chr14	118132619	118132819	+	1000	promoter-TSS (NM_029578)	promoter-TSS (NM_029578)	46	NM_029578	76355	Mm.251537	NM_029578	ENSMUSG00000022130	Tgds	2610017J16Rik|2610025M23Rik|AI648925	TDP-glucose 4,6-dehydratase	protein-coding
128.704	-0.531009	0.322299	-1.64757	0.0994417	0.702418	Cx3cr1WT-Cx3cr1KO	chr6	91684922	91685205	+	1000	intron (NM_009320, intron 1 of 14)	intron (NM_009320, intron 1 of 14)	996	NM_009320	21366	Mm.395650	NM_009320	ENSMUSG00000030096	Slc6a6	AA589629|C80501|Taut	solute carrier family 6 (neurotransmitter transporter, taurine), member 6	protein-coding
56.1984	0.380875	0.359154	1.06048	0.288927	0.885562	Cx3cr1WT-Cx3cr1KO	chr9	35199781	35200136	+	1000	promoter-TSS (NM_001177847)	promoter-TSS (NM_001177847)	7	NM_001177846	117149	Mm.23987	NM_054096	ENSMUSG00000032041	Tirap	AA407980|C130027E04Rik|Mal|Tlr4ap|Wyatt	toll-interleukin 1 receptor (TIR) domain-containing adaptor protein	protein-coding
83.6176	-0.248977	0.337785	-0.737086	0.46107	0.931076	Cx3cr1WT-Cx3cr1KO	chr1	183369328	183369575	+	1000	exon (NM_177389, exon 1 of 27)	exon (NM_177389, exon 1 of 27)	114	NM_177389	338366	Mm.41152	NM_177389		Mia3	9130229H14Rik|A930039G15Rik|AU022327|B230399H06Rik|C80126|Gm1525|TANGO1|Tango	melanoma inhibitory activity 3	protein-coding
53.6597	1.10245	0.363455	3.03324	0.00241947	0.193605	Cx3cr1WT-Cx3cr1KO	chr4	132345534	132345737	+	1000	intron (NM_133878, intron 1 of 9)	CpG	115	NM_001197082	100088	Mm.255045	NM_133878	ENSMUSG00000028896	Rcc1	4931417M11Rik|AI326872|Chc1	regulator of chromosome condensation 1	protein-coding
72.454	-0.0768603	0.357068	-0.215254	0.82957	0.991394	Cx3cr1WT-Cx3cr1KO	chr2	165326736	165326964	+	1000	promoter-TSS (NM_207706)	promoter-TSS (NM_207706)	-371	NM_207706	140579	Mm.35064	NM_080287	ENSMUSG00000017670	Elmo2	1190002F24Rik|CED-12	engulfment and cell motility 2	protein-coding
134.817	-0.126321	0.334649	-0.377474	0.705821	0.979658	Cx3cr1WT-Cx3cr1KO	chr9	114844447	114844729	+	1000	promoter-TSS (NM_027294)	promoter-TSS (NM_027294)	-436	NM_027294	70031	Mm.150064	NM_027294	ENSMUSG00000041012	Cmtm8	2700018N07Rik|AA408515|Cklfsf8	CKLF-like MARVEL transmembrane domain containing 8	protein-coding
77.7113	-0.335889	0.349825	-0.960164	0.336973	0.902562	Cx3cr1WT-Cx3cr1KO	chr18	35771693	35771905	+	1000	5' UTR (NM_019912, exon 1 of 7)	5' UTR (NM_019912, exon 1 of 7)	240	NM_019912	56550	Mm.180052	NM_019912	ENSMUSG00000091896	Ube2d2a	1500034D03Rik|Ubc2e|Ube2d2|ubc4	ubiquitin-conjugating enzyme E2D 2A	protein-coding
122.884	0.095138	0.357185	0.266355	0.789966	0.987674	Cx3cr1WT-Cx3cr1KO	chr18	82692934	82693178	+	1000	promoter-TSS (NM_177832)	promoter-TSS (NM_177832)	-322	NM_177832	329002	Mm.34438	NM_177832	ENSMUSG00000041258	Zfp236	AI447957|Gm335	zinc finger protein 236	protein-coding
314.377	-0.0398798	0.23424	-0.170252	0.864812	0.993944	Cx3cr1WT-Cx3cr1KO	chr12	102439888	102440110	+	1000	promoter-TSS (NM_011175)	promoter-TSS (NM_011175)	-186	NM_011175	19141	Mm.17185	NM_011175	ENSMUSG00000021190	Lgmn	AEP|AI746452|AU022324|Prsc1	legumain	protein-coding
643.167	0.170478	0.181175	0.940959	0.346726	0.902562	Cx3cr1WT-Cx3cr1KO	chr17	72918199	72918449	+	1000	promoter-TSS (NM_029999)	promoter-TSS (NM_029999)	19	NM_029999	77889	Mm.154109	NM_029999	ENSMUSG00000024063	Lbh	1810009F10Rik|6720416L16Rik	limb-bud and heart	protein-coding
62.9338	-0.102151	0.361372	-0.282676	0.777426	0.986175	Cx3cr1WT-Cx3cr1KO	chr3	51276171	51276396	+	1000	promoter-TSS (NR_073429)	promoter-TSS (NR_073429)	-478	NR_073429	67746	Mm.441177	NR_073429	ENSMUSG00000087440	4930577N17Rik	-	RIKEN cDNA 4930577N17 gene	ncRNA
114.749	-0.0354535	0.325984	-0.108758	0.913394	0.993944	Cx3cr1WT-Cx3cr1KO	chr9	110304925	110305214	+	1000	promoter-TSS (NM_001081381)	promoter-TSS (NM_001081381)	-123	NM_001081381	72341	Mm.374250	NM_001081381	ENSMUSG00000054836	Elp6	2610001P13Rik|2610002I17Rik|AV159994|Tmem103	elongator acetyltransferase complex subunit 6	protein-coding
107.134	0.0104294	0.322506	0.0323386	0.974202	0.998197	Cx3cr1WT-Cx3cr1KO	chr11	69765557	69765852	+	1000	promoter-TSS (NM_029348)	promoter-TSS (NM_029348)	-208	NM_029348	75580	Mm.426361	NM_029348	ENSMUSG00000018750	Zbtb4	2310026P19Rik|9230111I22Rik|mKIAA1538	zinc finger and BTB domain containing 4	protein-coding
270.213	0.165556	0.258022	0.641636	0.521109	0.946726	Cx3cr1WT-Cx3cr1KO	chrX	134585398	134585783	+	1000	promoter-TSS (NM_019865)	promoter-TSS (NM_019865)	-64	NM_019865	19982	Mm.286408	NM_019865	ENSMUSG00000079435	Rpl36a	L44L|Rpl44	ribosomal protein L36A	protein-coding
32.182	0.0130852	0.360609	0.0362862	0.971054	NA	Cx3cr1WT-Cx3cr1KO	chr8	74993559	74993763	+	1000	promoter-TSS (NM_001316753)	promoter-TSS (NM_001316753)	11	NM_178017	70823	Mm.261739	NM_178017	ENSMUSG00000034518	Hmgxb4	4733401K04Rik|AI316803|Hmgb2l1	HMG box domain containing 4	protein-coding
134.996	0.50873	0.309856	1.64183	0.100625	0.70317	Cx3cr1WT-Cx3cr1KO	chr1	177796267	177796500	+	1000	exon (NM_007422, exon 1 of 13)	exon (NM_007422, exon 1 of 13)	126	NM_007422	11566	Mm.338021	NM_007422	ENSMUSG00000015961	Adss	AI314886|AS|Adss2	adenylosuccinate synthetase, non muscle	protein-coding
103.891	-0.0202325	0.325243	-0.0622074	0.950398	0.998009	Cx3cr1WT-Cx3cr1KO	chr5	140389041	140389279	+	1000	exon (NM_172277, exon 1 of 11)	exon (NM_172277, exon 1 of 11)	148	NM_172277	231834	Mm.27098	NM_172277	ENSMUSG00000029560	Snx8	B130023O14Rik	sorting nexin 8	protein-coding
109.429	0.0988577	0.324102	0.305021	0.76035	0.983463	Cx3cr1WT-Cx3cr1KO	chr12	31499822	31500108	+	1000	promoter-TSS (NM_134048)	promoter-TSS (NM_134048)	-349	NM_001253848	104836	Mm.273270	NM_134048	ENSMUSG00000020659	Cbll1	AI467391|Hakai|c-Cbl-like	Casitas B-lineage lymphoma-like 1	protein-coding
129.138	-0.0909409	0.307316	-0.29592	0.767291	0.984237	Cx3cr1WT-Cx3cr1KO	chr1	132008086	132008290	+	1000	intron (NM_007923, intron 1 of 4)	CpG	583	NM_007923	13714	Mm.254233	NM_007923	ENSMUSG00000026436	Elk4	2310011G17Rik|A130026I01Rik|BB162516|SAP-1|Sap1	ELK4, member of ETS oncogene family	protein-coding
77.0882	0.40618	0.343008	1.18417	0.236345	0.85955	Cx3cr1WT-Cx3cr1KO	chr13	21787161	21787369	+	1000	promoter-TSS (NM_178202)	promoter-TSS (NM_178202)	-47	NM_178184	319170		NM_178184	ENSMUSG00000069309	Hist1h2an	-	histone cluster 1, H2an	protein-coding
98.9353	-0.313705	0.331127	-0.947385	0.343443	0.902562	Cx3cr1WT-Cx3cr1KO	chr11	40755385	40755593	+	1000	promoter-TSS (NM_009831)	promoter-TSS (NM_009831)	-203	NM_009831	12450	Mm.2103	NM_009831	ENSMUSG00000020326	Ccng1	AI314029	cyclin G1	protein-coding
62.7646	-0.163324	0.359366	-0.454478	0.649485	0.971373	Cx3cr1WT-Cx3cr1KO	chr2	14074046	14074246	+	1000	promoter-TSS (NR_038162)	promoter-TSS (NR_038162)	46	NM_011484	20844	Mm.273174	NM_011484	ENSMUSG00000026718	Stam	STAM1	signal transducing adaptor molecule (SH3 domain and ITAM motif) 1	protein-coding
73.6312	0.23575	0.354832	0.664399	0.506435	0.940296	Cx3cr1WT-Cx3cr1KO	chr14	54617874	54618108	+	1000	promoter-TSS (NM_011186)	promoter-TSS (NM_011186)	4	NM_011186	19173	Mm.8911	NM_011186	ENSMUSG00000022193	Psmb5	-	proteasome (prosome, macropain) subunit, beta type 5	protein-coding
177.825	-0.207233	0.307835	-0.673196	0.500823	0.939071	Cx3cr1WT-Cx3cr1KO	chr7	81523305	81523551	+	1000	promoter-TSS (NR_045299)	promoter-TSS (NR_045299)	-122	NR_045299	100504421	Mm.217071	NR_045299	ENSMUSG00000097277	2900076A07Rik	WI1-1616M8.2	RIKEN cDNA 2900076A07 gene	ncRNA
49.8825	0.0434493	0.360551	0.120508	0.904081	0.993944	Cx3cr1WT-Cx3cr1KO	chr13	42052693	42052978	+	1000	intron (NM_007772, intron 1 of 8)	intron (NM_007772, intron 1 of 8)	814	NM_007772	110521	Mm.4808	NM_007772	ENSMUSG00000021366	Hivep1	Cryabp1	human immunodeficiency virus type I enhancer binding protein 1	protein-coding
95.6428	0.155921	0.347264	0.448997	0.653434	0.971379	Cx3cr1WT-Cx3cr1KO	chr6	125231576	125231855	+	1000	TTS (NM_001286753)	TTS (NM_001286753)	145	NM_145391	213233	Mm.296902	NM_145391	ENSMUSG00000038213	Tapbpl	BC017613|TAPBPL-R|Tapbplr	TAP binding protein-like	protein-coding
197.254	0.102031	0.276255	0.369337	0.711877	0.981042	Cx3cr1WT-Cx3cr1KO	chr14	54912953	54913198	+	1000	promoter-TSS (NM_001360406)	promoter-TSS (NM_001360406)	57	NM_001360406	59049	Mm.27435	NM_021551	ENSMUSG00000022199	Slc22a17	1700094C23Rik|24p3R|AU041908|AW555662|BOIT|Boct	solute carrier family 22 (organic cation transporter), member 17	protein-coding
232.923	0.297916	0.276742	1.07651	0.281698	0.882062	Cx3cr1WT-Cx3cr1KO	chr9	63602637	63602883	+	1000	promoter-TSS (NM_001311098)	promoter-TSS (NM_001311098)	114	NR_151671	66939	Mm.34338	NM_025857	ENSMUSG00000037257	Aagab	2310007F21Rik|p34	alpha- and gamma-adaptin binding protein	protein-coding
254.098	-0.235657	0.252886	-0.931872	0.351403	0.902562	Cx3cr1WT-Cx3cr1KO	chr13	23746361	23746620	+	1000	promoter-TSS (NM_175664)	promoter-TSS (NM_175664)	-244	NM_175664	319178	Mm.390567	NM_175664	ENSMUSG00000075031	Hist1h2bb	H2b-143	histone cluster 1, H2bb	protein-coding
427.682	0.499764	0.228364	2.18846	0.0286363	0.480051	Cx3cr1WT-Cx3cr1KO	chr17	34000142	34000358	+	1000	promoter-TSS (NM_001347346)	promoter-TSS (NM_001347346)	83	NM_001001892	14972	Mm.422886	NM_001001892	ENSMUSG00000061232	H2-K1	H-2K|H-2K(d)|H2-K|K-f	histocompatibility 2, K1, K region	protein-coding
236.725	0.137154	0.257372	0.532902	0.594101	0.958203	Cx3cr1WT-Cx3cr1KO	chr3	16183117	16183365	+	1000	promoter-TSS (NM_001145919)	promoter-TSS (NM_001145919)	76	NM_172677	229096	Mm.23834	NM_172677	ENSMUSG00000047213	Ythdf3	9130022A11Rik	YTH domain family 3	protein-coding
27.9886	0.575226	0.359802	1.59873	0.109881	NA	Cx3cr1WT-Cx3cr1KO	chr15	59081485	59081704	+	1000	5' UTR (NM_001146180, exon 1 of 14)	5' UTR (NM_001146180, exon 1 of 14)	432	NM_001146180	211401	Mm.215481	NM_144800	ENSMUSG00000022353	Mtss1	2310003N14Rik|BC024131|D130001D01Rik|Mim|mKIAA0429	metastasis suppressor 1	protein-coding
169.404	-0.0364995	0.289719	-0.125982	0.899746	0.993944	Cx3cr1WT-Cx3cr1KO	chr15	34082446	34082674	+	1000	promoter-TSS (NM_026002)	promoter-TSS (NM_026002)	-159	NM_001357926	67154	Mm.130883	NM_026002	ENSMUSG00000022255	Mtdh	2610103J23Rik|3D3|3D3/Lyric|AEG-1|AV353288|D8Bwg1112e|Lyric	metadherin	protein-coding
68.5591	0.705243	0.35493	1.98699	0.0469235	0.559945	Cx3cr1WT-Cx3cr1KO	chr17	71183549	71183763	+	1000	promoter-TSS (NM_022882)	promoter-TSS (NM_022882)	124	NM_001357791	64898	Mm.227924	NM_022882	ENSMUSG00000024052	Lpin2	2610511G02Rik|AI481352|AW742896	lipin 2	protein-coding
47.6567	-0.16329	0.363336	-0.449418	0.65313	0.971379	Cx3cr1WT-Cx3cr1KO	chr19	6978472	6978704	+	1000	exon (NM_001360288, exon 3 of 6)	exon (NM_001360288, exon 3 of 6)	804	NM_001360288	14227	Mm.4234	NM_008020	ENSMUSG00000056629	Fkbp2	mFKBP13|mFKBP2	FK506 binding protein 2	protein-coding
261.034	-0.443778	0.249678	-1.7774	0.0755025	0.642598	Cx3cr1WT-Cx3cr1KO	chr15	99972559	99972888	+	1000	promoter-TSS (NM_001284523)	promoter-TSS (NM_001284523)	-57	NM_001024526	207214	Mm.28811	NM_001024526	ENSMUSG00000023025	Larp4	DXErtd793|DXErtd793e	La ribonucleoprotein domain family, member 4	protein-coding
232.339	0.120707	0.26721	0.451733	0.651461	0.971373	Cx3cr1WT-Cx3cr1KO	chr3	96629827	96630078	+	1000	promoter-TSS (NM_025875)	promoter-TSS (NM_025875)	24	NM_001102407	60365	Mm.261972	NM_025875	ENSMUSG00000038374	Rbm8a	2310057C03Rik|AA673428|Rbm8	RNA binding motif protein 8a	protein-coding
65.6329	-0.519653	0.358883	-1.44797	0.147625	0.77718	Cx3cr1WT-Cx3cr1KO	chr9	106887185	106887450	+	1000	promoter-TSS (NM_175402)	promoter-TSS (NM_175402)	-317	NM_175402	109095	Mm.431589	NM_175402	ENSMUSG00000074102	Rbm15b	1810017N16Rik	RNA binding motif protein 15B	protein-coding
42.2083	-0.176846	0.363563	-0.486425	0.626666	NA	Cx3cr1WT-Cx3cr1KO	chr7	35586182	35586409	+	1000	promoter-TSS (NM_145840)	promoter-TSS (NM_145840)	48	NR_152519	245886	Mm.272620	NM_145633	ENSMUSG00000034867	Ankrd27	AA408090|BC016493|D330003H11Rik|Varp	ankyrin repeat domain 27 (VPS9 domain)	protein-coding
242.826	0.501191	0.261612	1.91578	0.0553927	0.585509	Cx3cr1WT-Cx3cr1KO	chr5	105699698	105700087	+	1000	promoter-TSS (NM_178701)	promoter-TSS (NM_178701)	-77	NM_001122768	231549	Mm.23837	NM_178701	ENSMUSG00000046079	Lrrc8d	2810473G09Rik|4930525N13Rik|A930019F03|Lrrc5	leucine rich repeat containing 8D	protein-coding
169.383	0.381579	0.296086	1.28874	0.197488	0.834746	Cx3cr1WT-Cx3cr1KO	chr1	172082554	172082776	+	1000	promoter-TSS (NM_021607)	promoter-TSS (NM_021607)	84	NM_021607	59287	Mm.218203	NM_021607	ENSMUSG00000003458	Ncstn	9430068N19Rik|AA727311|Aph2|D1Dau13e|Kiaa0253|Nct|mKIAA0253	nicastrin	protein-coding
176.542	0.644045	0.282101	2.28303	0.0224285	0.457261	Cx3cr1WT-Cx3cr1KO	chr2	103761100	103761544	+	1000	promoter-TSS (NM_153126)	promoter-TSS (NM_153126)	-52	NM_153126	98956	Mm.288005	NM_153126	ENSMUSG00000027185	Nat10	AI429152	N-acetyltransferase 10	protein-coding
98.1504	1.14234	0.328635	3.47603	0.000508903	0.103842	Cx3cr1WT-Cx3cr1KO	chr11	55204308	55204570	+	1000	promoter-TSS (NM_153139)	promoter-TSS (NM_153139)	99	NM_153139	215335	Mm.35732	NM_153139	ENSMUSG00000020261	Slc36a1	5830411H19Rik|AI839897|Pat1	solute carrier family 36 (proton/amino acid symporter), member 1	protein-coding
158.25	0.168754	0.306773	0.550093	0.582256	0.956591	Cx3cr1WT-Cx3cr1KO	chr13	55105248	55105456	+	1000	promoter-TSS (NM_012017)	promoter-TSS (NM_012017)	43	NM_012017	26919	Mm.22795	NM_012017	ENSMUSG00000021481	Zfp346	Jaz|Znf346	zinc finger protein 346	protein-coding
145.962	-0.294145	0.324168	-0.907384	0.364204	0.906712	Cx3cr1WT-Cx3cr1KO	chr3	105052723	105052974	+	1000	intron (NM_030249, intron 1 of 5)	CpG	105	NM_001163332	80281	Mm.200327	NM_030249	ENSMUSG00000062127	Cttnbp2nl	AA552995|AA589392|AU018624|BC003236|mKIAA1433	CTTNBP2 N-terminal like	protein-coding
164.283	0.208428	0.297552	0.700475	0.483631	0.931076	Cx3cr1WT-Cx3cr1KO	chr8	25201775	25202023	+	1000	promoter-TSS (NM_177089)	promoter-TSS (NM_177089)	-357	NM_177089	320165	Mm.308452	NM_177089	ENSMUSG00000065954	Tacc1	4833447E04Rik|AA960202|B230378H13Rik	transforming, acidic coiled-coil containing protein 1	protein-coding
161.665	-0.243784	0.287164	-0.848936	0.395917	0.914739	Cx3cr1WT-Cx3cr1KO	chr14	120275603	120275875	+	1000	promoter-TSS (NM_207515)	promoter-TSS (NM_207515)	70	NM_001360380	105559	Mm.238266	NM_175341	ENSMUSG00000022139	Mbnl2	1110002M11Rik|AI047808|AI837313|AI849185|AL118326|MBLL|R75232|mKIAA4072	muscleblind like splicing factor 2	protein-coding
48.2943	-0.0720017	0.361823	-0.198997	0.842265	0.992437	Cx3cr1WT-Cx3cr1KO	chr10	13474377	13474606	+	1000	promoter-TSS (NM_001195065)	promoter-TSS (NM_001195065)	-95	NM_001195065	215789	Mm.283359	NM_001033257	ENSMUSG00000062866	Phactr2	AV158170|BC012871	phosphatase and actin regulator 2	protein-coding
307.407	0.0686701	0.25211	0.272381	0.785329	0.986928	Cx3cr1WT-Cx3cr1KO	chr4	120925074	120925304	+	1000	promoter-TSS (NM_001160043)	promoter-TSS (NM_001160043)	-184	NM_001160043	73172	Mm.151436	NM_028457	ENSMUSG00000028629	Exo5	3110037I16Rik|AV297100|Dem1|Exo V|mExo5	exonuclease 5	protein-coding
704.502	0.223477	0.16625	1.34422	0.178876	0.815582	Cx3cr1WT-Cx3cr1KO	chr16	23107690	23107904	+	1000	exon (NM_013506, exon 1 of 11)	exon (NM_013506, exon 1 of 11)	329	NM_001347179	13682	Mm.260084	NM_013506	ENSMUSG00000022884	Eif4a2	4833432N07Rik|BM-010|Ddx2b|Eif4|eIF-4A-II|eIF4A-II	eukaryotic translation initiation factor 4A2	protein-coding
214.758	0.0269861	0.299117	0.0902194	0.928113	0.994985	Cx3cr1WT-Cx3cr1KO	chr3	133091782	133092133	+	1000	promoter-TSS (NM_026231)	promoter-TSS (NM_026231)	82	NM_001356309	67553	Mm.304899	NM_026231	ENSMUSG00000028018	Gstcd	4933434L15Rik	glutathione S-transferase, C-terminal domain containing	protein-coding
144.681	-0.10351	0.31449	-0.329135	0.742054	0.98239	Cx3cr1WT-Cx3cr1KO	chr3	106721824	106722046	+	1000	5' UTR (NM_001039488, exon 1 of 4)	5' UTR (NM_001039488, exon 1 of 4)	253	NM_001286685	321000	Mm.259638	NM_028081	ENSMUSG00000056260	Lrif1	2010012G17Rik|4933421E11Rik|AI450568	ligand dependent nuclear receptor interacting factor 1	protein-coding
50.5514	-0.460908	0.363604	-1.26761	0.204937	0.840097	Cx3cr1WT-Cx3cr1KO	chr12	28675176	28675373	+	1000	promoter-TSS (NM_134052)	promoter-TSS (NM_134052)	67	NM_134052	104923	Mm.291504	NM_134052	ENSMUSG00000020629	Adi1	AL024210|Fe-ARD|MTCBP-1|Ni-ARD	acireductone dioxygenase 1	protein-coding
120.739	0.262263	0.324299	0.808706	0.418684	0.918481	Cx3cr1WT-Cx3cr1KO	chr18	34777677	34777953	+	1000	intron (NM_001081256, intron 1 of 23)	intron (NM_001081256, intron 1 of 23)	807	NM_001081256	277250	Mm.277906	NM_029518	ENSMUSG00000038773	Kdm3b	5830462I21Rik|JHDM2B|Jmjd1b|mKIAA1082	KDM3B lysine (K)-specific demethylase 3B	protein-coding
121.293	-0.0857378	0.33808	-0.253603	0.799803	0.98788	Cx3cr1WT-Cx3cr1KO	chr2	69789615	69789826	+	1000	promoter-TSS (NM_028521)	promoter-TSS (NM_028521)	-17	NM_028521	73373	Mm.9621	NM_028521	ENSMUSG00000027088	Phospho2	1700048E23Rik|AI661517|AU021728|AV006103|Phos2	phosphatase, orphan 2	protein-coding
54.1576	0.0118137	0.360675	0.0327544	0.97387	0.998197	Cx3cr1WT-Cx3cr1KO	chr5	74535460	74535656	+	1000	promoter-TSS (NM_001159574)	promoter-TSS (NM_001159574)	76	NM_001159574	66899	Mm.272468	NM_024183	ENSMUSG00000029227	Fip1l1	1300019H17Rik|Rje	FIP1 like 1 (S. cerevisiae)	protein-coding
36.4539	-0.377101	0.362408	-1.04054	0.298088	NA	Cx3cr1WT-Cx3cr1KO	chr13	48513300	48513517	+	1000	promoter-TSS (NM_001164575)	promoter-TSS (NM_001164575)	2	NM_001164575	67911	Mm.251375	NM_026450	ENSMUSG00000050954	Zfp169	1700025J14Rik|4930429A13Rik|BE688704	zinc finger protein 169	protein-coding
79.9874	0.265665	0.346225	0.767318	0.442892	0.926673	Cx3cr1WT-Cx3cr1KO	chr16	27388703	27388929	+	1000	promoter-TSS (NM_026202)	promoter-TSS (NM_026202)	-140	NM_001025615	67501	Mm.258985	NM_026202	ENSMUSG00000038127	Ccdc50	C3orf6	coiled-coil domain containing 50	protein-coding
136.985	0.385059	0.330973	1.16342	0.244661	0.860364	Cx3cr1WT-Cx3cr1KO	chr8	57488435	57488688	+	1000	promoter-TSS (NM_021788)	promoter-TSS (NM_021788)	598	NR_126555	78353	Mm.426240	NR_126553	ENSMUSG00000096917	2500002B13Rik	-	RIKEN cDNA 2500002B13 gene	ncRNA
106.072	-0.00332086	0.35743	-0.00929096	0.992587	0.999755	Cx3cr1WT-Cx3cr1KO	chr10	91170638	91170893	+	1000	promoter-TSS (NM_001283048)	promoter-TSS (NM_001283048)	-215	NM_001283048	21917	Mm.159684	NM_011605	ENSMUSG00000019961	Tmpo	5630400D24Rik|AI195756|AI606875|AW214352|AW547477|LAP2|TP	thymopoietin	protein-coding
84.6249	0.372448	0.34607	1.07622	0.281827	0.882062	Cx3cr1WT-Cx3cr1KO	chr18	74779085	74779361	+	1000	promoter-TSS (NR_028560)	promoter-TSS (NR_028560)	11	NM_177470	52538	Mm.245724	NM_177470	ENSMUSG00000036880	Acaa2	0610011L04Rik|AI255831|AI265397|D18Ertd240e	acetyl-Coenzyme A acyltransferase 2 (mitochondrial 3-oxoacyl-Coenzyme A thiolase)	protein-coding
237.587	-0.0820913	0.257442	-0.318873	0.749823	0.982855	Cx3cr1WT-Cx3cr1KO	chr12	35047835	35048084	+	1000	intron (NM_001014973, intron 1 of 25)	intron (NM_001014973, intron 1 of 25)	770	NM_001014973	217463	Mm.213991	NM_001014973	ENSMUSG00000020590	Snx13	Rgs-px1|mKIAA0713	sorting nexin 13	protein-coding
444.535	0.03395	0.220119	0.154234	0.877425	0.993944	Cx3cr1WT-Cx3cr1KO	chr1	36939915	36940161	+	1000	promoter-TSS (NM_018872)	promoter-TSS (NM_018872)	-511	NM_018872	56030	Mm.186943	NM_018872	ENSMUSG00000026116	Tmem131	2610524E03Rik|CC28|D1Bwg0491e|Neg|RW1|YR-23|mKIAA0257	transmembrane protein 131	protein-coding
385.304	-0.244486	0.230501	-1.06067	0.288838	0.885562	Cx3cr1WT-Cx3cr1KO	chr2	72980517	72980836	+	1000	promoter-TSS (NM_001018042)	promoter-TSS (NM_001018042)	-230	NM_001018042	20687	Mm.124328	NM_011450	ENSMUSG00000027109	Sp3	D130027J01Rik	trans-acting transcription factor 3	protein-coding
320.271	0.0512553	0.232831	0.220139	0.825763	0.990948	Cx3cr1WT-Cx3cr1KO	chr9	120933390	120933621	+	1000	promoter-TSS (NM_001165902)	promoter-TSS (NM_001165902)	-73	NM_001165902	12387	Mm.291928	NM_007614	ENSMUSG00000006932	Ctnnb1	Bfc|Catnb|Mesc	catenin (cadherin associated protein), beta 1	protein-coding
35.6058	0.417533	0.361169	1.15606	0.247658	NA	Cx3cr1WT-Cx3cr1KO	chr15	74721140	74721353	+	1000	promoter-TSS (NM_198607)	promoter-TSS (NM_198607)	12	NM_198607	223626	Mm.268603	NM_198607	ENSMUSG00000056665	Them6	4930572J05Rik	thioesterase superfamily member 6	protein-coding
84.1652	-0.078064	0.351535	-0.222066	0.824263	0.990948	Cx3cr1WT-Cx3cr1KO	chr14	55106398	55106601	+	1000	promoter-TSS (NM_001303502)	promoter-TSS (NM_001303502)	94	NM_001303502	11766	Mm.238879	NM_007455	ENSMUSG00000040701	Ap1g2	Adtg2|G2ad	adaptor protein complex AP-1, gamma 2 subunit	protein-coding
27.0234	-0.220078	0.35781	-0.615069	0.538509	NA	Cx3cr1WT-Cx3cr1KO	chr5	4104302	4104524	+	1000	5' UTR (NM_020010, exon 1 of 10)	5' UTR (NM_020010, exon 1 of 10)	284	NM_020010	13121	Mm.140158	NM_020010	ENSMUSG00000001467	Cyp51	AI426508|CYPLI|Cyp51a1|Ldm|P450-14DM|P450LI	cytochrome P450, family 51	protein-coding
169.461	-0.192439	0.28639	-0.671947	0.501617	0.939405	Cx3cr1WT-Cx3cr1KO	chr7	127912440	127912742	+	1000	promoter-TSS (NM_026370)	promoter-TSS (NM_026370)	74	NM_026370	67773	Mm.425492	NM_026370	ENSMUSG00000030801	Kat8	2010203C02Rik|5830450F21Rik|D7Ertd629e|MOF|MYST-1|Myst1	K(lysine) acetyltransferase 8	protein-coding
135.98	-0.229687	0.311411	-0.73757	0.460776	0.931076	Cx3cr1WT-Cx3cr1KO	chrX	18162576	18162802	+	1000	5' UTR (NM_009483, exon 1 of 29)	5' UTR (NM_009483, exon 1 of 29)	114	NM_001310444	22289	Mm.257498	NM_009483	ENSMUSG00000037369	Kdm6a	Utx	lysine (K)-specific demethylase 6A	protein-coding
78.7518	-0.426836	0.346917	-1.23037	0.218558	0.854106	Cx3cr1WT-Cx3cr1KO	chr6	124829878	124830134	+	1000	promoter-TSS (NM_001326594)	promoter-TSS (NM_001326594)	-170	NM_013538	14793	Mm.285723	NM_013538	ENSMUSG00000023505	Cdca3	2410005A12Rik|C8|Grcc8|Tome-1	cell division cycle associated 3	protein-coding
73.5457	0.829863	0.347658	2.38701	0.0169861	0.413967	Cx3cr1WT-Cx3cr1KO	chr7	78847047	78847298	+	1000	promoter-TSS (NM_029585)	promoter-TSS (NM_029585)	39	NM_029585	76375	Mm.250541	NM_029585	ENSMUSG00000030610	Det1	2610034H20Rik	de-etiolated homolog 1 (Arabidopsis)	protein-coding
140.643	0.17531	0.304935	0.57491	0.565352	0.953728	Cx3cr1WT-Cx3cr1KO	chr12	91848930	91849217	+	1000	promoter-TSS (NM_011344)	promoter-TSS (NM_011344)	84	NM_001039089	20338	Mm.250605	NM_011344	ENSMUSG00000020964	Sel1l	AW493766|Sel1h|mKIAA4137	sel-1 suppressor of lin-12-like (C. elegans)	protein-coding
39.9175	0.0652962	0.362843	0.179957	0.857186	NA	Cx3cr1WT-Cx3cr1KO	chr13	94058344	94058566	+	1000	intron (NM_172589, intron 1 of 3)	intron (NM_172589, intron 1 of 3)	659	NM_172589	218454	Mm.316553	NM_172589	ENSMUSG00000045312	Lhfpl2	6030465B15|AI447312|AW050335|mKIAA0206|vgim	lipoma HMGIC fusion partner-like 2	protein-coding
91.0716	0.0408637	0.339674	0.120303	0.904243	0.993944	Cx3cr1WT-Cx3cr1KO	chr10	128303662	128303867	+	1000	intron (NM_001358822, intron 1 of 25)	intron (NM_001358822, intron 1 of 25)	429	NM_001252326	103135	Mm.244183	NM_133992	ENSMUSG00000005682	Pan2	1200014O24Rik|AI047843|AW742773|Usp52|mKIAA0710	PAN2 poly(A) specific ribonuclease subunit	protein-coding
88.0146	0.289637	0.333469	0.868556	0.38509	0.914739	Cx3cr1WT-Cx3cr1KO	chr1	84839176	84839503	+	1000	promoter-TSS (NM_025386)	promoter-TSS (NM_025386)	-35	NM_133975	14897	Mm.209265	NM_133975	ENSMUSG00000026219	Trip12	1110036I07Rik|6720416K24Rik|AA410158|Gtl6|TRIP-12	thyroid hormone receptor interactor 12	protein-coding
45.8537	0.689531	0.361988	1.90484	0.0568006	NA	Cx3cr1WT-Cx3cr1KO	chr11	105181050	105181306	+	1000	promoter-TSS (NM_001294334)	promoter-TSS (NM_001294334)	255	NR_027956	73431	Mm.351426	NM_028539		1700052K11Rik	AI840954	RIKEN cDNA 1700052K11 gene	ncRNA
69.4634	0.469144	0.352222	1.33196	0.182874	0.820122	Cx3cr1WT-Cx3cr1KO	chr11	3514644	3515062	+	1000	5' UTR (NM_053267, exon 1 of 5)	5' UTR (NM_053267, exon 1 of 5)	169	NM_053267	114679	Mm.34046	NM_053267	ENSMUSG00000075702	Selenom	1500040L08Rik|A230103K18|Selm|Sepm	selenoprotein M	protein-coding
74.9017	-0.738404	0.350027	-2.10956	0.0348963	0.513318	Cx3cr1WT-Cx3cr1KO	chr10	85957645	85957866	+	1000	promoter-TSS (NM_145422)	promoter-TSS (NM_145422)	38	NM_145422	28088	Mm.9257	NM_145422	ENSMUSG00000001783	Rtcb	AI255213|AI463255|D10Wsu52e|FAAP|HSPC117	RNA 2',3'-cyclic phosphate and 5'-OH ligase	protein-coding
250.891	-0.0921988	0.269845	-0.341673	0.732597	0.98239	Cx3cr1WT-Cx3cr1KO	chr9	108991430	108991657	+	1000	promoter-TSS (NM_173019)	promoter-TSS (NM_173019)	-359	NM_173019	270198	Mm.132391	NM_173019	ENSMUSG00000025648	Pfkfb4	C230090D14	6-phosphofructo-2-kinase/fructose-2,6-biphosphatase 4	protein-coding
192.086	0.170037	0.277041	0.613763	0.539372	0.947487	Cx3cr1WT-Cx3cr1KO	chr8	117498228	117498451	+	1000	promoter-TSS (NM_172285)	promoter-TSS (NM_172285)	64	NM_172285	234779	Mm.192699	NM_172285	ENSMUSG00000034330	Plcg2	PLC-gamma-2|PLCgamma2|Plcg-2	phospholipase C, gamma 2	protein-coding
47.5623	-0.267162	0.362571	-0.736853	0.461212	0.931076	Cx3cr1WT-Cx3cr1KO	chr8	128358412	128358644	+	1000	promoter-TSS (NM_008737)	promoter-TSS (NM_008737)	-545	NM_001358959	18186	Mm.271745	NM_008737	ENSMUSG00000025810	Nrp1	C530029I03|NP-1|NPN-1|Npn1|Nrp	neuropilin 1	protein-coding
98.7539	0.397488	0.328437	1.21024	0.226187	0.854106	Cx3cr1WT-Cx3cr1KO	chr17	7169585	7169815	+	1000	promoter-TSS (NM_011299)	promoter-TSS (NM_011299)	-415	NM_011299	20112	Mm.268383	NM_011299	ENSMUSG00000023809	Rps6ka2	90kDa|D17Wsu134e|Rps6ka-rs1|Rsk3|p90rsk|pp90rsk	ribosomal protein S6 kinase, polypeptide 2	protein-coding
94.2484	-0.0161662	0.333842	-0.0484246	0.961378	0.998197	Cx3cr1WT-Cx3cr1KO	chr7	25219991	25220208	+	1000	promoter-TSS (NM_207677)	promoter-TSS (NM_207677)	-240	NM_207677	67379	Mm.280594	NM_026117	ENSMUSG00000054499	Dedd2	2410050E11Rik|FLAME-3	death effector domain-containing DNA binding protein 2	protein-coding
307.432	-0.275502	0.232459	-1.18517	0.235952	0.85955	Cx3cr1WT-Cx3cr1KO	chr4	125066455	125066684	+	1000	promoter-TSS (NM_175223)	promoter-TSS (NM_175223)	-103	NM_175246	76793	Mm.22548	NM_175246	ENSMUSG00000050213	Snip1	2410133M08Rik	Smad nuclear interacting protein 1	protein-coding
184.235	0.100207	0.280933	0.356693	0.721322	0.981655	Cx3cr1WT-Cx3cr1KO	chr1	170644189	170644447	+	1000	promoter-TSS (NM_177068)	promoter-TSS (NM_177068)	-214	NM_177068	320078	Mm.287131	NM_177068	ENSMUSG00000038463	Olfml2b	1110018N05Rik|4832415H08Rik|AI467542	olfactomedin-like 2B	protein-coding
257.039	-0.378173	0.252611	-1.49706	0.134379	0.755776	Cx3cr1WT-Cx3cr1KO	chr9	103304907	103305135	+	1000	promoter-TSS (NM_176979)	promoter-TSS (NM_176979)	-306	NM_176979	235559	Mm.259893	NM_176979	ENSMUSG00000032555	Topbp1	1110031N14Rik|2810429C13Rik|AI256758|D430026L04Rik|mKIAA0259	topoisomerase (DNA) II binding protein 1	protein-coding
79.3667	-0.0436091	0.350577	-0.124392	0.901005	0.993944	Cx3cr1WT-Cx3cr1KO	chr7	25754487	25754851	+	1000	promoter-TSS (NM_001360789)	promoter-TSS (NM_001360789)	90	NM_144922	232989	Mm.254223	NM_144922	ENSMUSG00000040725	Hnrnpul1	E130317O14Rik|E1B-AP5|E1BAP5|Hnrnpul|Hnrpul1	heterogeneous nuclear ribonucleoprotein U-like 1	protein-coding
89.7203	-0.356002	0.334786	-1.06337	0.287613	0.885562	Cx3cr1WT-Cx3cr1KO	chr15	80264189	80264429	+	1000	promoter-TSS (NM_175109)	promoter-TSS (NM_175109)	-3	NM_175109	66538	Mm.39485	NM_175109	ENSMUSG00000051518	Rps19bp1	2510038A11Rik|AI604923|S19BP	ribosomal protein S19 binding protein 1	protein-coding
79.2306	-0.422589	0.343464	-1.23038	0.218556	0.854106	Cx3cr1WT-Cx3cr1KO	chr1	171917574	171917810	+	1000	5' UTR (NM_030710, exon 1 of 8)	5' UTR (NM_030710, exon 1 of 8)	230	NM_001347186	30925	Mm.486404	NM_030710	ENSMUSG00000015314	Slamf6	KAL1|KAL1b|Ly108|NTB-A|NTBA|SF2000	SLAM family member 6	protein-coding
45.8402	0.119961	0.362527	0.330901	0.740719	NA	Cx3cr1WT-Cx3cr1KO	chr7	28277643	28277883	+	1000	promoter-TSS (NM_001177427)	promoter-TSS (NM_001177427)	57	NM_001177427	434156	Mm.118535	NM_001177427	ENSMUSG00000070705	Eid2b	3010005C08Rik	EP300 interacting inhibitor of differentiation 2B	protein-coding
116.768	-0.313272	0.322252	-0.972132	0.330985	0.902562	Cx3cr1WT-Cx3cr1KO	chr2	165885572	165885934	+	1000	promoter-TSS (NM_001252584)	promoter-TSS (NM_001252584)	-915	NM_001252587	228880	Mm.227598	NM_027230	ENSMUSG00000039671	Zmynd8	1110013E22Rik|2010005I16Rik|3632413B07Rik|AI316811|AL024039|Prkcbp1|RACK7	zinc finger, MYND-type containing 8	protein-coding
57.3026	0.11815	0.359909	0.328276	0.742703	0.98239	Cx3cr1WT-Cx3cr1KO	chr2	119972358	119972557	+	1000	promoter-TSS (NM_011941)	promoter-TSS (NM_011941)	-242	NM_001355293	26390	Mm.330501	NM_011941	ENSMUSG00000033902	Mapkbp1	2810483F24Rik|AW123212|JNKBP-1|Jnkbp1|mKIAA0596	mitogen-activated protein kinase binding protein 1	protein-coding
109.587	0.138612	0.327006	0.423883	0.671651	0.9758	Cx3cr1WT-Cx3cr1KO	chr18	54992446	54992726	+	1000	promoter-TSS (NM_001360787)	promoter-TSS (NM_001360787)	5	NM_001360787	269023	Mm.192984	NM_175751	ENSMUSG00000052713	Zfp608	4932417D18Rik|D430007A19Rik|Znf608	zinc finger protein 608	protein-coding
77.2475	0.0925269	0.34193	0.270602	0.786697	0.98724	Cx3cr1WT-Cx3cr1KO	chr16	3908487	3908752	+	1000	promoter-TSS (NM_029738)	promoter-TSS (NM_029738)	34	NR_153801	105246059		NR_153801		Gm41410	-	predicted gene, 41410	ncRNA
259.517	-0.485032	0.246155	-1.97044	0.0487883	0.560731	Cx3cr1WT-Cx3cr1KO	chr11	100822432	100822666	+	1000	promoter-TSS (NM_011489)	promoter-TSS (NM_011489)	21	NM_011489	20851	Mm.34064	NM_011489	ENSMUSG00000020919	Stat5b	-	signal transducer and activator of transcription 5B	protein-coding
41.6919	0.439957	0.363428	1.21058	0.226057	NA	Cx3cr1WT-Cx3cr1KO	chr3	69598883	69599222	+	1000	promoter-TSS (NM_020026)	promoter-TSS (NM_020026)	-92	NM_020026	26879	Mm.153710	NM_020026	ENSMUSG00000043300	B3galnt1	B3galt3|b3GT3	UDP-GalNAc:betaGlcNAc beta 1,3-galactosaminyltransferase, polypeptide 1	protein-coding
376.85	-0.0759179	0.211279	-0.359326	0.719351	0.981655	Cx3cr1WT-Cx3cr1KO	chr11	121354450	121354756	+	1000	promoter-TSS (NM_025793)	promoter-TSS (NM_025793)	-156	NM_025793	66840	Mm.103986	NM_025793	ENSMUSG00000025173	Wdr45b	0610008N23Rik|AA408735|D16Bwg0193e|WIPI-3|Wdr45l	WD repeat domain 45B	protein-coding
280.761	0.354474	0.25238	1.40453	0.160162	0.796466	Cx3cr1WT-Cx3cr1KO	chr16	10992190	10992422	+	1000	intron (NM_019980, intron 1 of 3)	intron (NM_019980, intron 1 of 3)	815	NM_019980	56722	Mm.294753	NM_019980	ENSMUSG00000022500	Litaf	3222402J11Rik|C85531|N4WBP3|TBX1	LPS-induced TN factor	protein-coding
263.626	0.174213	0.253839	0.686313	0.492515	0.933994	Cx3cr1WT-Cx3cr1KO	chr9	90054445	90054668	+	1000	exon (NM_007801, exon 1 of 12)	exon (NM_007801, exon 1 of 12)	289	NM_001312649	13036	Mm.2277	NM_007801	ENSMUSG00000032359	Ctsh	AL022844	cathepsin H	protein-coding
185.448	0.695035	0.274828	2.52898	0.0114393	0.370506	Cx3cr1WT-Cx3cr1KO	chr11	116843086	116843410	+	1000	promoter-TSS (NM_028865)	promoter-TSS (NM_028865)	201	NM_033398	107817	Mm.481684	NM_033398	ENSMUSG00000056962	Jmjd6	5730436I23Rik|D11Ertd195e|PSR|PtdSerR|Ptdsr|mKIAA0585	jumonji domain containing 6	protein-coding
76.4181	0.0298118	0.350282	0.0851079	0.932176	0.995205	Cx3cr1WT-Cx3cr1KO	chr12	4592568	4592929	+	1000	promoter-TSS (NM_001198968)	promoter-TSS (NM_001198968)	-260	NM_001198969	20403	Mm.341204	NM_011365	ENSMUSG00000020640	Itsn2	AI327390|Ese2|Sh3d1B|Sh3p18|mKIAA1256	intersectin 2	protein-coding
44.5052	0.277305	0.363432	0.763017	0.445453	NA	Cx3cr1WT-Cx3cr1KO	chr1	10232863	10233130	+	1000	promoter-TSS (NM_001102430)	promoter-TSS (NM_001102430)	-326	NM_001102430	211673	Mm.229141	NM_001102430	ENSMUSG00000067851	Arfgef1	ARFGEP1|BIG1|D130059B05Rik|D730028O18Rik|P200	ADP-ribosylation factor guanine nucleotide-exchange factor 1(brefeldin A-inhibited)	protein-coding
146.464	0.317294	0.307512	1.03181	0.30216	0.892713	Cx3cr1WT-Cx3cr1KO	chr1	59684878	59685165	+	1000	promoter-TSS (NM_018868)	promoter-TSS (NM_018868)	15	NM_018868	55989	Mm.220367	NM_018868	ENSMUSG00000026020	Nop58	MSSP|Nol5|SIK|nop5	NOP58 ribonucleoprotein	protein-coding
85.8179	0.139018	0.350243	0.396919	0.691427	0.977385	Cx3cr1WT-Cx3cr1KO	chr7	27474357	27474636	+	1000	intron (NM_133210, intron 1 of 1)	intron (NM_133210, intron 1 of 1)	656	NM_133210	170742	Mm.200120	NM_133210	ENSMUSG00000055200	Sertad3	AW124805|D1Mgi51|Rbt1|Sei3	SERTA domain containing 3	protein-coding
122.03	0.146803	0.33359	0.440069	0.659887	0.972496	Cx3cr1WT-Cx3cr1KO	chr11	16508159	16508402	+	1000	5' UTR (NM_011343, exon 1 of 4)	5' UTR (NM_011343, exon 1 of 4)	204	NM_011343	20335	Mm.325350	NM_011343	ENSMUSG00000078974	Sec61g	-	SEC61, gamma subunit	protein-coding
240.978	-0.00214667	0.257386	-0.00834027	0.993346	0.999755	Cx3cr1WT-Cx3cr1KO	chr5	144223439	144223857	+	1000	promoter-TSS (NM_001356992)	promoter-TSS (NM_001356992)	-33	NM_001356993	70381	Mm.239412	NM_027410	ENSMUSG00000066621	Tecpr1	2210010N04Rik|mKIAA1358	tectonin beta-propeller repeat containing 1	protein-coding
293.079	0.537088	0.235822	2.27751	0.0227556	0.457261	Cx3cr1WT-Cx3cr1KO	chr9	119339887	119340158	+	1000	promoter-TSS (NM_010851)	promoter-TSS (NM_010851)	18	NM_010851	17874	Mm.213003	NM_010851	ENSMUSG00000032508	Myd88	-	myeloid differentiation primary response gene 88	protein-coding
96.8632	0.225816	0.351815	0.641862	0.520963	0.946726	Cx3cr1WT-Cx3cr1KO	chr18	24121378	24121603	+	1000	intron (NM_172625, intron 1 of 4)	intron (NM_172625, intron 1 of 4)	329	NM_172625	225280	Mm.258973	NM_172625	ENSMUSG00000047989	Ino80c	D030070L09Rik	INO80 complex subunit C	protein-coding
57.4684	0.341357	0.356028	0.958794	0.337662	0.902562	Cx3cr1WT-Cx3cr1KO	chr2	136892156	136892361	+	1000	promoter-TSS (NM_001141946)	promoter-TSS (NM_001141946)	90	NM_001355669	74243	Mm.330612	NM_028201	ENSMUSG00000027281	Slx4ip	2210009G21Rik|2410004I22Rik|C85661|Slxip	SLX4 interacting protein	protein-coding
96.4946	-0.455106	0.346099	-1.31496	0.188523	0.822001	Cx3cr1WT-Cx3cr1KO	chr6	38918915	38919240	+	1000	promoter-TSS (NM_011539)	promoter-TSS (NM_011539)	91	NM_011539	21391	Mm.4054	NM_011539	ENSMUSG00000029925	Tbxas1	CYP5|CYP5A1|THAS|TS|TXAS|TXS	thromboxane A synthase 1, platelet	protein-coding
335.64	-0.328129	0.225807	-1.45314	0.146185	0.776061	Cx3cr1WT-Cx3cr1KO	chr6	124732927	124733199	+	1000	promoter-TSS (NM_013545)	promoter-TSS (NM_013545)	91	NM_013545	15170	Mm.271799	NM_013545	ENSMUSG00000004266	Ptpn6	70Z-SHP|Hcph|PTPTY-42|Ptp1C|SH-PTP1|SHP-1|hcp|me	protein tyrosine phosphatase, non-receptor type 6	protein-coding
118.581	-0.28505	0.34166	-0.834311	0.404106	0.914739	Cx3cr1WT-Cx3cr1KO	chr17	87266008	87266238	+	1000	promoter-TSS (NM_139295)	promoter-TSS (NM_139295)	-176	NM_139295	193813	Mm.30251	NM_139295	ENSMUSG00000024150	Mcfd2	1810021C21Rik|F5f8d|Lman1ip|Sdnsf	multiple coagulation factor deficiency 2	protein-coding
378.358	0.231783	0.214036	1.08292	0.278845	0.879757	Cx3cr1WT-Cx3cr1KO	chr15	36608842	36609074	+	1000	promoter-TSS (NM_008774)	promoter-TSS (NM_008774)	15	NM_008774	18458	Mm.371570	NM_008774	ENSMUSG00000022283	Pabpc1	PABP|Pabp1|PabpI|Pabpl1|ePAB	poly(A) binding protein, cytoplasmic 1	protein-coding
127.031	-0.102535	0.314315	-0.326217	0.74426	0.98239	Cx3cr1WT-Cx3cr1KO	chr1	135147347	135147606	+	1000	intron (NM_026823, intron 1 of 6)	CpG	642	NM_026823	68724	Mm.174998	NM_026823	ENSMUSG00000026426	Arl8a	1110033P22Rik|Arl10b|gie2	ADP-ribosylation factor-like 8A	protein-coding
39.7945	-0.149599	0.363585	-0.411456	0.680738	NA	Cx3cr1WT-Cx3cr1KO	chr4	88033196	88033393	+	1000	5' UTR (NM_027326, exon 1 of 11)	5' UTR (NM_027326, exon 1 of 11)	113	NM_027326	70122	Mm.288898	NM_027326	ENSMUSG00000028496	Mllt3	2210011H10Rik|2610012I03Rik|3830408D16Rik|Af9|D4Ertd321e	myeloid/lymphoid or mixed-lineage leukemia; translocated to, 3	protein-coding
194.173	-0.215694	0.272623	-0.79118	0.428839	0.921101	Cx3cr1WT-Cx3cr1KO	chr2	25272245	25272475	+	1000	promoter-TSS (NM_023464)	promoter-TSS (NM_023464)	58	NM_023464	68475	Mm.21444	NM_023464	ENSMUSG00000026966	Ssna1	1110003H09Rik|1190004J23Rik|AA934184|N14|NA14	SS nuclear autoantigen 1	protein-coding
153.6	0.210149	0.293793	0.715296	0.474426	0.931076	Cx3cr1WT-Cx3cr1KO	chr12	113014044	113014296	+	1000	promoter-TSS (NM_001291444)	promoter-TSS (NM_001291444)	-338	NM_001291445	217893	Mm.35754	NM_198165	ENSMUSG00000021143	Pacs2	6720425G15Rik|AW208651|AW489976|E230011J22|Pacs1l|mKIAA0602	phosphofurin acidic cluster sorting protein 2	protein-coding
161.319	0.474663	0.291066	1.63077	0.102938	0.705177	Cx3cr1WT-Cx3cr1KO	chr16	5203871	5204190	+	1000	promoter-TSS (NM_013796)	promoter-TSS (NM_013796)	-18	NR_027804	27426	Mm.215641	NM_013796	ENSMUSG00000023143	Nagpa	AI596180|UCE	N-acetylglucosamine-1-phosphodiester alpha-N-acetylglucosaminidase	protein-coding
68.3112	0.00325404	0.348864	0.00932751	0.992558	0.999755	Cx3cr1WT-Cx3cr1KO	chr7	5051617	5051891	+	1000	intron (NM_026900, intron 1 of 1)	CpG	222	NM_026900	68992	Mm.41484	NM_026900	ENSMUSG00000055633	Zfp580	1500015O20Rik|AI838225|Znf580	zinc finger protein 580	protein-coding
25.1618	-0.578989	0.352561	-1.64224	0.100541	NA	Cx3cr1WT-Cx3cr1KO	chr18	56707834	56708031	+	1000	5' UTR (NM_010721, exon 1 of 11)	5' UTR (NM_010721, exon 1 of 11)	119	NM_010721	16906	Mm.4105	NM_010721	ENSMUSG00000024590	Lmnb1	-	lamin B1	protein-coding
103.314	-0.000972043	0.325572	-0.00298565	0.997618	0.999755	Cx3cr1WT-Cx3cr1KO	chr5	135149624	135149865	+	1000	promoter-TSS (NM_013763)	promoter-TSS (NM_013763)	33	NM_013763	27368	Mm.36746	NM_013763	ENSMUSG00000005374	Tbl2	C76179|WS-bTRP	transducin (beta)-like 2	protein-coding
52.4369	0.432586	0.360133	1.20118	0.22968	0.854106	Cx3cr1WT-Cx3cr1KO	chr5	74531800	74532070	+	1000	promoter-TSS (NM_178672)	promoter-TSS (NM_178672)	-193	NM_001114660	212986	Mm.134147	NM_178672	ENSMUSG00000062110	Scfd2	E430013M20Rik|STXBP1L1	Sec1 family domain containing 2	protein-coding
77.6202	-0.184712	0.351535	-0.525444	0.599274	0.958557	Cx3cr1WT-Cx3cr1KO	chr4	43031279	43031521	+	1000	promoter-TSS (NM_023231)	promoter-TSS (NM_023231)	-16	NM_023231	66592	Mm.331565	NM_023231	ENSMUSG00000028455	Stoml2	0610038F01Rik|MSLP2|SLP-2	stomatin (Epb7.2)-like 2	protein-coding
193.781	0.134376	0.280275	0.479443	0.631624	0.966928	Cx3cr1WT-Cx3cr1KO	chr9	70678928	70679221	+	1000	promoter-TSS (NM_007399)	promoter-TSS (NM_007399)	92	NM_007399	11487	Mm.3037	NM_007399	ENSMUSG00000054693	Adam10	1700031C13Rik|MADM|kuz|kuzbanian	a disintegrin and metallopeptidase domain 10	protein-coding
109.007	0.130231	0.336605	0.386896	0.698834	0.978679	Cx3cr1WT-Cx3cr1KO	chr15	78900626	78900900	+	1000	intron (NM_001316685, intron 1 of 17)	intron (NM_001316685, intron 1 of 17)	995	NM_009164	20401	Mm.4462	NM_009164	ENSMUSG00000022436	Sh3bp1	3BP-1	SH3-domain binding protein 1	protein-coding
95.1389	-0.0787147	0.339068	-0.23215	0.816421	0.990013	Cx3cr1WT-Cx3cr1KO	chr14	55585140	55585371	+	1000	promoter-TSS (NM_033146)	promoter-TSS (NM_033146)	-1	NM_033146	85308	Mm.40667	NM_033146	ENSMUSG00000022217	Emc9	1500005A01Rik|Cgi112|Fam158a	ER membrane protein complex subunit 9	protein-coding
332.07	0.549131	0.227525	2.41349	0.0158004	0.405543	Cx3cr1WT-Cx3cr1KO	chr3	142395493	142395740	+	1000	promoter-TSS (NM_001190855)	promoter-TSS (NM_001190855)	80	NM_001190853	56376	Mm.117709	NM_019808	ENSMUSG00000028273	Pdlim5	1110001A05Rik|AI987914|C87059|Enh|Enh1|Enh2|Enh3|LIM	PDZ and LIM domain 5	protein-coding
143.803	0.534626	0.315438	1.69487	0.0901001	0.674676	Cx3cr1WT-Cx3cr1KO	chr11	96829673	96830005	+	1000	promoter-TSS (NM_001130450)	promoter-TSS (NM_001130450)	129	NM_008686	18023	Mm.6743	NM_008686	ENSMUSG00000038615	Nfe2l1	AA408798|AW212678|LCR-F1|Lcrf1|NRF1|TCF-11|TCF11	nuclear factor, erythroid derived 2,-like 1	protein-coding
77.4172	0.332291	0.349548	0.950632	0.341791	0.902562	Cx3cr1WT-Cx3cr1KO	chr3	84259829	84260035	+	1000	promoter-TSS (NM_001271727)	promoter-TSS (NM_001271727)	-153	NM_001271727	80890	Mm.44876	NM_030706	ENSMUSG00000027993	Trim2	mKIAA0517|narf	tripartite motif-containing 2	protein-coding
78.3999	0.269418	0.348804	0.772404	0.439875	0.926418	Cx3cr1WT-Cx3cr1KO	chr11	101226241	101226478	+	1000	intron (NM_007970, intron 1 of 20)	CpG	104	NM_007970	14055	Mm.5027	NM_007970	ENSMUSG00000006920	Ezh1	ENX-2	enhancer of zeste 1 polycomb repressive complex 2 subunit	protein-coding
279.007	-0.420803	0.24436	-1.72206	0.0850585	0.66356	Cx3cr1WT-Cx3cr1KO	chr11	69991443	69991808	+	1000	5' UTR (NM_019749, exon 1 of 4)	5' UTR (NM_019749, exon 1 of 4)	255	NM_019749	56486	Mm.272460	NM_019749	ENSMUSG00000018567	Gabarap	-	gamma-aminobutyric acid receptor associated protein	protein-coding
49.9731	-0.348978	0.363116	-0.961064	0.33652	0.902562	Cx3cr1WT-Cx3cr1KO	chr11	82035501	82035723	+	1000	promoter-TSS (NM_011333)	promoter-TSS (NM_011333)	35	NM_011333	20296	Mm.290320	NM_011333	ENSMUSG00000035385	Ccl2	AI323594|HC11|JE|MCAF|MCP-1|MCP1|SMC-CF|Scya2|Sigje	chemokine (C-C motif) ligand 2	protein-coding
75.5995	0.141299	0.344968	0.409601	0.682099	0.976639	Cx3cr1WT-Cx3cr1KO	chr13	21453540	21453755	+	1000	promoter-TSS (NM_001013786)	promoter-TSS (NM_001013786)	80	NM_001013786	432731	Mm.390557	NM_001013786	ENSMUSG00000022228	Zscan26	BC068174|Zfp187|Znf187	zinc finger and SCAN domain containing 26	protein-coding
115.432	0.0185506	0.320016	0.0579676	0.953774	0.998197	Cx3cr1WT-Cx3cr1KO	chr11	60878697	60878919	+	1000	5' UTR (NM_001168507, exon 1 of 3)	5' UTR (NM_001168507, exon 1 of 3)	230	NM_173453	216821	Mm.28063	NM_173453	ENSMUSG00000043284	Tmem11	5730466P16Rik|AA409091	transmembrane protein 11	protein-coding
63.0161	-1.15205	0.361742	-3.18472	0.00144892	0.178455	Cx3cr1WT-Cx3cr1KO	chr7	142386943	142387144	+	1000	intron (NM_009983, intron 1 of 8)	intron (NM_009983, intron 1 of 8)	827	NM_009983	13033	Mm.231395	NM_009983	ENSMUSG00000007891	Ctsd	CD|CatD	cathepsin D	protein-coding
47.3752	-0.0323186	0.363515	-0.0889058	0.929157	0.994985	Cx3cr1WT-Cx3cr1KO	chr9	73039664	73039875	+	1000	promoter-TSS (NM_018889)	promoter-TSS (NM_018889)	51	NM_001308425	66364	Mm.392089	NM_001308425		2310009A05Rik	5031420N21Rik	RIKEN cDNA 2310009A05 gene	protein-coding
90.4443	-0.16009	0.335562	-0.47708	0.633305	0.966928	Cx3cr1WT-Cx3cr1KO	chr10	75764047	75764256	+	1000	5' UTR (NM_172549, exon 1 of 37)	5' UTR (NM_172549, exon 1 of 37)	206	NM_172549	104248	Mm.257404	NM_172549	ENSMUSG00000020196	Cabin1	A330070M20Rik|Cain|Ppp3in	calcineurin binding protein 1	protein-coding
172.21	0.005747	0.294163	0.0195368	0.984413	0.998197	Cx3cr1WT-Cx3cr1KO	chr3	88552745	88553015	+	1000	promoter-TSS (NM_033526)	promoter-TSS (NM_033526)	71	NR_155543	83409	Mm.41680	NM_031248	ENSMUSG00000028062	Lamtor2	2010111E04Rik|AL022628|Mapbpip|P14|Rab25|Robld3	late endosomal/lysosomal adaptor, MAPK and MTOR activator 2	protein-coding
149.844	0.207235	0.301792	0.686681	0.492284	0.933929	Cx3cr1WT-Cx3cr1KO	chr16	38522666	38522946	+	1000	promoter-TSS (NM_024273)	promoter-TSS (NM_024273)	-143	NM_024273	76916	Mm.132231	NM_024273	ENSMUSG00000002846	Timmdc1	2810021C21Rik|4930455C21Rik|AV135763	translocase of inner mitochondrial membrane domain containing 1	protein-coding
640.51	0.186392	0.176754	1.05453	0.291642	0.886146	Cx3cr1WT-Cx3cr1KO	chr1	171502809	171503188	+	1000	promoter-TSS (NM_019484)	promoter-TSS (NM_019484)	-480	NM_019484	56009	Mm.389208	NM_019484	ENSMUSG00000060244	Alyref2	C130042O11Rik|REF2|Refbp2	Aly/REF export factor 2	protein-coding
34.6443	0.079101	0.363194	0.217793	0.827591	NA	Cx3cr1WT-Cx3cr1KO	chr1	192137845	192138058	+	1000	promoter-TSS (NM_144814)	promoter-TSS (NM_144814)	89	NM_001290278	214742	Mm.207457	NM_144814	ENSMUSG00000037395	Rcor3	4921514E24Rik|C730034D20Rik|E130101E15Rik	REST corepressor 3	protein-coding
39.6914	0.177688	0.362874	0.489669	0.624368	NA	Cx3cr1WT-Cx3cr1KO	chrX	7728371	7728672	+	1000	promoter-TSS (NM_138602)	promoter-TSS (NM_138602)	-50	NM_138602	54637	Mm.28850	NM_138602	ENSMUSG00000031149	Praf2	AA986329|C78013|DXImx39e|JM4|Sfc20	PRA1 domain family 2	protein-coding
336.813	-0.871768	0.229162	-3.80415	0.000142291	0.0553037	Cx3cr1WT-Cx3cr1KO	chr17	35201767	35202080	+	1000	promoter-TSS (NM_001278601)	promoter-TSS (NM_001278601)	84	NM_013693	21926	Mm.1293	NM_013693	ENSMUSG00000024401	Tnf	DIF|TNF-a|TNF-alpha|TNFSF2|TNFalpha|Tnfa|Tnfsf1a|Tnlg1f	tumor necrosis factor	protein-coding
150.867	0.058683	0.302162	0.19421	0.846011	0.993188	Cx3cr1WT-Cx3cr1KO	chrX	85776871	85777148	+	1000	promoter-TSS (NM_001294138)	promoter-TSS (NM_001294138)	-190	NM_001294138	14933	Mm.246682	NM_008194	ENSMUSG00000025059	Gk	D930012N15Rik|Gyk	glycerol kinase	protein-coding
65.765	-0.0519575	0.355987	-0.145954	0.883958	0.993944	Cx3cr1WT-Cx3cr1KO	chr7	127992944	127993240	+	1000	intron (NM_023258, intron 2 of 2)	intron (NM_023258, intron 2 of 2)	775	NM_023258	66824	Mm.24163	NM_023258	ENSMUSG00000030793	Pycard	9130417A21Rik|Asc|CARD5|TMS-1|TNS1|masc	PYD and CARD domain containing	protein-coding
106.435	0.00536145	0.328904	0.0163009	0.986994	0.998197	Cx3cr1WT-Cx3cr1KO	chr7	90129733	90129974	+	1000	promoter-TSS (NM_146194)	promoter-TSS (NM_146194)	83	NR_046007	78329	Mm.389940	NR_046006	ENSMUSG00000097162	2310010J17Rik	-	RIKEN cDNA 2310010J17 gene	ncRNA
101.612	-0.0523683	0.326522	-0.160382	0.87258	0.993944	Cx3cr1WT-Cx3cr1KO	chr9	20652027	20652272	+	1000	promoter-TSS (NM_023371)	promoter-TSS (NM_023371)	19	NM_023371	23988	Mm.7906	NM_023371	ENSMUSG00000032171	Pin1	0610025L01Rik|D9Bwg1161e	protein (peptidyl-prolyl cis/trans isomerase) NIMA-interacting 1	protein-coding
443.2	0.0851684	0.225236	0.37813	0.705334	0.979658	Cx3cr1WT-Cx3cr1KO	chr14	50924718	50925124	+	1000	promoter-TSS (NM_133676)	promoter-TSS (NM_133676)	-28	NM_133676	66246	Mm.274791	NM_133676	ENSMUSG00000006289	Osgep	1500019L24Rik|GCPL-1|PRSMG1	O-sialoglycoprotein endopeptidase	protein-coding
71.1123	-0.104508	0.35032	-0.298323	0.765457	0.983463	Cx3cr1WT-Cx3cr1KO	chr8	85025567	85025788	+	1000	promoter-TSS (NM_001357202)	promoter-TSS (NM_001357202)	-390	NM_001357202	56495	Mm.41475	NM_019652	ENSMUSG00000052456	Asna1	1810048H22Rik|ArsA	arsA arsenite transporter, ATP-binding, homolog 1 (bacterial)	protein-coding
153.203	-0.0577013	0.301104	-0.191633	0.84803	0.993188	Cx3cr1WT-Cx3cr1KO	chr6	86733367	86733649	+	1000	promoter-TSS (NM_011818)	promoter-TSS (NM_011818)	-130	NM_011818	23885	Mm.321452	NM_011818	ENSMUSG00000001157	Gmcl1	2810049L19Rik|Btbd13|DIP|Gcl|Gcl-1|glc-1|mglc-1	germ cell-less, spermatogenesis associated 1	protein-coding
132.324	-0.445759	0.346302	-1.2872	0.198025	0.835188	Cx3cr1WT-Cx3cr1KO	chr8	84066211	84066441	+	1000	promoter-TSS (NM_009055)	promoter-TSS (NM_009055)	-510	NM_009055	19724	Mm.7892	NM_009055	ENSMUSG00000031706	Rfx1	AI047719|AI385641	regulatory factor X, 1 (influences HLA class II expression)	protein-coding
87.3658	0.831948	0.335438	2.48018	0.0131314	0.384153	Cx3cr1WT-Cx3cr1KO	chr18	73572674	73572931	+	1000	promoter-TSS (NM_001039214)	promoter-TSS (NM_001039214)	97	NM_001039214	240396	Mm.24131	NM_001039214	ENSMUSG00000037253	Mex3c	A130001D14Rik|BC035207|BM-013|Rkhd2	mex3 RNA binding family member C	protein-coding
144.448	-0.252793	0.303878	-0.831892	0.40547	0.914739	Cx3cr1WT-Cx3cr1KO	chr6	72362253	72362476	+	1000	promoter-TSS (NM_001331173)	promoter-TSS (NM_001331173)	68	NM_001331171	66510	Mm.170023	NM_025607	ENSMUSG00000055850	Rnf181	1700047F16Rik|2500002L14Rik|6230415N01Rik|C77350	ring finger protein 181	protein-coding
273.876	0.0273073	0.256546	0.106442	0.915232	0.993944	Cx3cr1WT-Cx3cr1KO	chr11	60776687	60777056	+	1000	promoter-TSS (NM_175491)	promoter-TSS (NM_175491)	494	NM_009410	21975	Mm.10708	NM_009410	ENSMUSG00000002814	Top3a	-	topoisomerase (DNA) III alpha	protein-coding
118.104	-0.439775	0.319917	-1.37465	0.169239	0.809559	Cx3cr1WT-Cx3cr1KO	chr5	145201629	145201918	+	1000	5' UTR (NM_023322, exon 1 of 3)	5' UTR (NM_023322, exon 1 of 3)	109	NM_023322	67235	Mm.432480	NM_023322	ENSMUSG00000029627	Zkscan14	2310046C23Rik|2810437E14Rik|Zfp99|Znf394	zinc finger with KRAB and SCAN domains 14	protein-coding
167.902	0.112648	0.291244	0.386781	0.698918	0.978679	Cx3cr1WT-Cx3cr1KO	chr1	60343064	60343285	+	1000	promoter-TSS (NM_001313721)	promoter-TSS (NM_001313721)	-126	NM_030013	77951	Mm.197640	NM_030013	ENSMUSG00000049439	Cyp20a1	A930011N14Rik|Cypm	cytochrome P450, family 20, subfamily a, polypeptide 1	protein-coding
305.318	0.0408933	0.247665	0.165115	0.868853	0.993944	Cx3cr1WT-Cx3cr1KO	chr11	83298911	83299199	+	1000	promoter-TSS (NM_134025)	promoter-TSS (NM_134025)	-78	NM_134025	103737	Mm.102205	NM_134025	ENSMUSG00000018733	Pex12	AI451906	peroxisomal biogenesis factor 12	protein-coding
186.558	0.167962	0.308764	0.54398	0.586455	0.95738	Cx3cr1WT-Cx3cr1KO	chr9	13827652	13827908	+	1000	promoter-TSS (NM_001310721)	promoter-TSS (NM_001310721)	64	NM_176836	72826	Mm.246174	NM_176836	ENSMUSG00000037808	Fam76b	2810485I05Rik|C78303	family with sequence similarity 76, member B	protein-coding
326.776	0.403429	0.229667	1.75658	0.0789895	0.655764	Cx3cr1WT-Cx3cr1KO	chr11	59228059	59228285	+	1000	promoter-TSS (NM_001130408)	promoter-TSS (NM_001130408)	-10	NM_001130408	11840	Mm.371546	NM_007476	ENSMUSG00000048076	Arf1	-	ADP-ribosylation factor 1	protein-coding
296.165	-0.633666	0.238702	-2.65463	0.00793951	0.310059	Cx3cr1WT-Cx3cr1KO	chr5	32746466	32746678	+	1000	promoter-TSS (NM_001347332)	promoter-TSS (NM_001347332)	-230	NM_001347332	320951	Mm.273765	NM_177298	ENSMUSG00000023452	Pisd	9030221M09Rik	phosphatidylserine decarboxylase	protein-coding
92.4596	0.730199	0.342303	2.13319	0.0329089	0.504891	Cx3cr1WT-Cx3cr1KO	chr2	71055703	71055913	+	1000	promoter-TSS (NM_145524)	promoter-TSS (NM_145524)	64	NM_001165980	75763	Mm.281668	NM_198005	ENSMUSG00000041966	Dcaf17	2810055O12Rik|4833418A01Rik|A030004A10Rik|A930009G19Rik|AI448937	DDB1 and CUL4 associated factor 17	protein-coding
180.83	0.352557	0.282156	1.24951	0.211478	0.84677	Cx3cr1WT-Cx3cr1KO	chr14	62761497	62761728	+	1000	promoter-TSS (NM_008715)	promoter-TSS (NM_008715)	-500	NM_008715	18130	Mm.319684	NM_008715	ENSMUSG00000035161	Ints6	2900075H24Rik|AI480962|DICE1|Ddx26|HDB|Notch2l	integrator complex subunit 6	protein-coding
112.935	0.764503	0.329269	2.32182	0.0202427	0.446885	Cx3cr1WT-Cx3cr1KO	chr4	138325675	138325951	+	1000	intron (NM_026880, intron 1 of 7)	CpG	483	NM_026880	68943	Mm.18539	NM_026880	ENSMUSG00000028756	Pink1	1190006F07Rik|AU042772|AW557854|BRPK|mFLJ00387	PTEN induced putative kinase 1	protein-coding
198.097	0.673169	0.322243	2.08901	0.0367071	0.5246	Cx3cr1WT-Cx3cr1KO	chr12	76370388	76370652	+	1000	promoter-TSS (NM_028356)	promoter-TSS (NM_028356)	254	NM_178744	268564	Mm.77065	NM_178744	ENSMUSG00000033454	Zbtb1	9430077A12|AI256369|Bsg2|C430003J21Rik	zinc finger and BTB domain containing 1	protein-coding
267.325	0.59114	0.243488	2.4278	0.0151907	0.397392	Cx3cr1WT-Cx3cr1KO	chr15	95790546	95790887	+	1000	promoter-TSS (NM_001253813)	promoter-TSS (NM_001253813)	-127	NM_175344	105722	Mm.38087	NM_175344	ENSMUSG00000064210	Ano6	2900059G15Rik|AA407480|AW554778|F730003B03Rik|Tmem16f	anoctamin 6	protein-coding
34.8504	-0.314259	0.360849	-0.870886	0.383816	NA	Cx3cr1WT-Cx3cr1KO	chr8	106338781	106339042	+	1000	promoter-TSS (NM_021491)	promoter-TSS (NM_021491)	-923	NM_021491	58994	Mm.23298	NM_021491	ENSMUSG00000031906	Smpd3	4631433G07Rik|AI427456|AW537966|fro|nSMase2	sphingomyelin phosphodiesterase 3, neutral	protein-coding
121.925	-0.0227037	0.326954	-0.0694399	0.944639	0.996529	Cx3cr1WT-Cx3cr1KO	chr13	113663450	113663705	+	1000	promoter-TSS (NM_019960)	promoter-TSS (NM_019960)	99	NM_019960	56534	Mm.41410	NM_019960	ENSMUSG00000051456	Hspb3	2310035K17Rik|AI844863|Hsbp3|spb3	heat shock protein 3	protein-coding
224.13	-0.186978	0.269286	-0.694349	0.487463	0.931759	Cx3cr1WT-Cx3cr1KO	chr13	56178725	56178987	+	1000	promoter-TSS (NM_001168615)	promoter-TSS (NM_001168615)	29	NM_145976	212937	Mm.116697	NM_145976	ENSMUSG00000049625	Tifab	-	TRAF-interacting protein with forkhead-associated domain, family member B	protein-coding
108.723	0.0437873	0.321037	0.136393	0.89151	0.993944	Cx3cr1WT-Cx3cr1KO	chr17	78882377	78882621	+	1000	promoter-TSS (NM_011163)	promoter-TSS (NM_011163)	73	NM_011163	19106	Mm.378990	NM_011163	ENSMUSG00000024079	Eif2ak2	2310047A08Rik|4732414G15Rik|AI467567|AI747578|Pkr|Prkr|Tik	eukaryotic translation initiation factor 2-alpha kinase 2	protein-coding
158.824	-0.749525	0.293648	-2.55246	0.0106965	0.353461	Cx3cr1WT-Cx3cr1KO	chr6	70843975	70844199	+	1000	promoter-TSS (NM_010121)	promoter-TSS (NM_010121)	-428	NM_010121	13666	Mm.247167	NM_010121	ENSMUSG00000031668	Eif2ak3	Pek|Perk	eukaryotic translation initiation factor 2 alpha kinase 3	protein-coding
28.5498	-0.824478	0.358865	-2.29746	0.0215924	NA	Cx3cr1WT-Cx3cr1KO	chr1	87326943	87327148	+	1000	promoter-TSS (NM_001110212)	promoter-TSS (NM_001110212)	47	NM_001110212	227331	Mm.23065	NM_146112	ENSMUSG00000048000	Gigyf2	2610016F01Rik|A830080H02Rik|AI852361|AW259676|BC006835|Tnrc15|mKIAA0642	GRB10 interacting GYF protein 2	protein-coding
161.585	-0.137324	0.291663	-0.470832	0.637761	0.967008	Cx3cr1WT-Cx3cr1KO	chr7	97417391	97417620	+	1000	promoter-TSS (NM_009381)	promoter-TSS (NM_009381)	45	NM_009381	21835	Mm.28585	NM_009381	ENSMUSG00000035686	Thrsp	S14|SPOT14	thyroid hormone responsive	protein-coding
110.017	0.114008	0.341792	0.33356	0.738711	0.98239	Cx3cr1WT-Cx3cr1KO	chr19	46348798	46349081	+	1000	promoter-TSS (NR_040418)	promoter-TSS (NR_040418)	49	NR_040418	75579	Mm.436708	NR_040418		2310034G01Rik	-	RIKEN cDNA 2310034G01 gene	ncRNA
52.2416	-0.741099	0.36048	-2.05587	0.0397954	0.534227	Cx3cr1WT-Cx3cr1KO	chr19	5795770	5796152	+	1000	promoter-TSS (NR_144621)	promoter-TSS (NR_144621)	20	NR_144621	109146451		NR_144621		Mascrna	-	Malat1-associated small cytoplasmic RNA	scRNA
642.401	0.200111	0.171734	1.16524	0.243922	0.860364	Cx3cr1WT-Cx3cr1KO	chr15	86214195	86214426	+	1000	promoter-TSS (NM_145476)	promoter-TSS (NM_145476)	-149	NM_145476	223754	Mm.28904	NM_145476	ENSMUSG00000051864	Tbc1d22a	BC023106|D15Ertd781e	TBC1 domain family, member 22a	protein-coding
575.398	0.00604129	0.183257	0.0329663	0.973701	0.998197	Cx3cr1WT-Cx3cr1KO	chr3	96220742	96220975	+	1000	promoter-TSS (NM_175662)	promoter-TSS (NM_175662)	22	NM_175662	319176	Mm.358954	NM_175662	ENSMUSG00000068855	Hist2h2ac	H2a-613b	histone cluster 2, H2ac	protein-coding
126.25	0.105344	0.32986	0.319361	0.749453	0.982855	Cx3cr1WT-Cx3cr1KO	chr4	55349552	55349802	+	1000	promoter-TSS (NM_009011)	promoter-TSS (NM_009011)	-365	NM_009011	19359	Mm.196846	NM_009011	ENSMUSG00000028426	Rad23b	0610007D13Rik|AV001138|HR23B|mHR23B|p58	RAD23 homolog B, nucleotide excision repair protein	protein-coding
117.474	-0.376634	0.315651	-1.1932	0.232792	0.858584	Cx3cr1WT-Cx3cr1KO	chr1	34843078	34843300	+	1000	promoter-TSS (NM_001160235)	promoter-TSS (NM_001160235)	-139	NM_001160236	214469	Mm.120151	NM_174997	ENSMUSG00000037503	Fam168b	Mani|mKIAA4042	family with sequence similarity 168, member B	protein-coding
247.888	0.498834	0.251084	1.98672	0.0469531	0.559945	Cx3cr1WT-Cx3cr1KO	chr16	20097493	20097714	+	1000	promoter-TSS (NM_029436)	promoter-TSS (NM_029436)	49	NM_029436	75785	Mm.392450	NM_029436	ENSMUSG00000062901	Klhl24	1110046J11Rik|4930429H24Rik|6530402O20Rik|C85082	kelch-like 24	protein-coding
205.708	0.0242276	0.281253	0.0861414	0.931354	0.995205	Cx3cr1WT-Cx3cr1KO	chr2	35109354	35109636	+	1000	promoter-TSS (NM_012018)	promoter-TSS (NM_012018)	3	NM_012018	26920	Mm.231332	NM_012018	ENSMUSG00000057110	Cntrl	6720467O09Rik|AA968343|Cep1|Cep110|IB3/5|Ma2a8|b2b1468.1Clo|b2b1468Clo	centriolin	protein-coding
68.1401	0.354317	0.36097	0.981568	0.326313	0.900571	Cx3cr1WT-Cx3cr1KO	chr15	84987825	84988046	+	1000	promoter-TSS (NM_001033273)	promoter-TSS (NM_001033273)	36	NM_001033273	223739	Mm.323925	NM_001033273	ENSMUSG00000036046	5031439G07Rik	AW554572|mKIAA0930	RIKEN cDNA 5031439G07 gene	protein-coding
79.1242	-0.144464	0.344114	-0.419816	0.67462	0.9758	Cx3cr1WT-Cx3cr1KO	chr19	24961451	24961669	+	1000	promoter-TSS (NR_033744)	promoter-TSS (NR_033744)	56	NR_033744	226043	Mm.272127	NM_146097	ENSMUSG00000024878	Cbwd1	AV349248|BC018472	COBW domain containing 1	protein-coding
28.864	-0.40536	0.357802	-1.13292	0.257249	NA	Cx3cr1WT-Cx3cr1KO	chr19	61228226	61228499	+	1000	promoter-TSS (NM_009970)	promoter-TSS (NM_009970)	56	NM_009970	12982	Mm.287228	NM_009970	ENSMUSG00000059326	Csf2ra	CD116|Csfgmra|GM-CSF-Ra|GM-CSFR	colony stimulating factor 2 receptor, alpha, low-affinity (granulocyte-macrophage)	protein-coding
242.72	-0.389352	0.259794	-1.49869	0.133954	0.755776	Cx3cr1WT-Cx3cr1KO	chr11	109363377	109363699	+	1000	non-coding (NR_038097, exon 1 of 2)	non-coding (NR_038097, exon 1 of 2)	116	NR_038097	100036768	Mm.467767	NR_038097	ENSMUSG00000056687	Gm11696	-	predicted gene 11696	ncRNA
379.043	-0.160625	0.21623	-0.742845	0.457575	0.931076	Cx3cr1WT-Cx3cr1KO	chr4	116556919	116557121	+	1000	promoter-TSS (NM_029868)	promoter-TSS (NM_029868)	-707	NM_029868	77110	Mm.41715	NM_029868	ENSMUSG00000034042	Gpbp1l1	5330440M15Rik|BC002292	GC-rich promoter binding protein 1-like 1	protein-coding
32.2383	-0.0460656	0.362303	-0.127146	0.898824	NA	Cx3cr1WT-Cx3cr1KO	chr15	84680898	84681100	+	1000	promoter-TSS (NM_146061)	promoter-TSS (NM_146061)	1	NM_146061	109270	Mm.291372	NM_146061	ENSMUSG00000036106	Prr5	AU043908|Arhgap8|C030017C09Rik|C78947|Protor-1|Protor1	proline rich 5 (renal)	protein-coding
193.427	0.305966	0.300598	1.01786	0.308745	0.892713	Cx3cr1WT-Cx3cr1KO	chr1	131138335	131138561	+	1000	promoter-TSS (NM_145508)	promoter-TSS (NM_145508)	-214	NM_145508	226419	Mm.39299	NM_145508	ENSMUSG00000016526	Dyrk3	BC006704	dual-specificity tyrosine-(Y)-phosphorylation regulated kinase 3	protein-coding
156.326	-0.391301	0.309582	-1.26397	0.206242	0.84192	Cx3cr1WT-Cx3cr1KO	chr2	26359974	26360320	+	1000	promoter-TSS (NM_001037747)	promoter-TSS (NM_001037747)	-600	NM_001037747	332579	Mm.330064	NM_001037747	ENSMUSG00000026928	Card9	Gm782	caspase recruitment domain family, member 9	protein-coding
98.3444	-0.0506825	0.330439	-0.153379	0.878099	0.993944	Cx3cr1WT-Cx3cr1KO	chr8	25720011	25720382	+	1000	TTS (NM_001081269)	TTS (NM_001081269)	148	NR_121643	71910	Mm.385055	NM_028000	ENSMUSG00000031570	Plpp5	1810019D05Rik|2310022A04Rik|AW045471|Ppapdc1|Ppapdc1b	phospholipid phosphatase 5	protein-coding
150.769	-0.268307	0.314603	-0.852844	0.393746	0.914739	Cx3cr1WT-Cx3cr1KO	chr17	27857023	27857328	+	1000	intron (NM_001080769, intron 1 of 20)	intron (NM_001080769, intron 1 of 20)	668	NM_001080769	224648	Mm.291291	NM_001080769	ENSMUSG00000039512	Uhrf1bp1	1110020K19Rik|AA408674|F830021D11Rik|mKIAA4127	UHRF1 (ICBP90) binding protein 1	protein-coding
69.7242	-0.565388	0.352712	-1.60297	0.10894	0.714959	Cx3cr1WT-Cx3cr1KO	chr4	21776189	21776466	+	1000	promoter-TSS (NM_001290425)	promoter-TSS (NM_001290425)	57	NM_152825	77593	Mm.154306	NM_152825	ENSMUSG00000040455	Usp45	3110003C05Rik|4930550B20Rik|AI843191|Gcap7	ubiquitin specific petidase 45	protein-coding
44.9028	-0.0444693	0.363458	-0.122351	0.902621	NA	Cx3cr1WT-Cx3cr1KO	chr17	34603425	34603648	+	1000	promoter-TSS (NM_019403)	promoter-TSS (NM_019403)	25	NM_019403	54197	Mm.274542	NM_019403	ENSMUSG00000015478	Rnf5	2410131O05Rik|AA407576|NG2	ring finger protein 5	protein-coding
181.249	0.763502	0.285159	2.67746	0.00741835	0.301237	Cx3cr1WT-Cx3cr1KO	chr7	64287639	64287922	+	1000	5' UTR (NM_172742, exon 1 of 16)	5' UTR (NM_172742, exon 1 of 16)	110	NM_172742	233315	Mm.214959	NM_172742	ENSMUSG00000030522	Mtmr10	BB128963|C79734	myotubularin related protein 10	protein-coding
187.826	-0.370522	0.276305	-1.34099	0.179925	0.816119	Cx3cr1WT-Cx3cr1KO	chr2	165287697	165287940	+	1000	promoter-TSS (NM_001252574)	promoter-TSS (NM_001252574)	20	NM_001252575	228875	Mm.21184	NM_144893	ENSMUSG00000017664	Slc35c2	C85957|CGI-15|D2Wsu58e|Ovcov1	solute carrier family 35, member C2	protein-coding
153.86	0.0510709	0.298118	0.171311	0.863979	0.993944	Cx3cr1WT-Cx3cr1KO	chr5	24685317	24685679	+	1000	promoter-TSS (NM_016736)	promoter-TSS (NM_016736)	-317	NM_016736	53312	Mm.5856	NM_016736	ENSMUSG00000028954	Nub1	4931404D21Rik|6330412F12Rik|BS4|NY-REN-18	negative regulator of ubiquitin-like proteins 1	protein-coding
64.9837	0.249299	0.351569	0.709105	0.478259	0.931076	Cx3cr1WT-Cx3cr1KO	chr19	47536890	47537097	+	1000	5' UTR (NM_175360, exon 1 of 10)	5' UTR (NM_175360, exon 1 of 10)	126	NM_175360	108689	Mm.218048	NM_175360	ENSMUSG00000042694	Stn1	0610009H20Rik|2310057J23Rik|AAF-44|AAF44|AI413458|Obfc1|RPA-32	STN1, CST complex subunit	protein-coding
328.428	-0.155154	0.22929	-0.67667	0.498616	0.937596	Cx3cr1WT-Cx3cr1KO	chr4	150087303	150087771	+	1000	promoter-TSS (NM_177366)	promoter-TSS (NM_177366)	34	NM_177366	269604	Mm.219307	NM_177366	ENSMUSG00000047875	Gpr157	F730108M23Rik	G protein-coupled receptor 157	protein-coding
53.8854	0.0559132	0.359432	0.15556	0.87638	0.993944	Cx3cr1WT-Cx3cr1KO	chr2	144599930	144600180	+	1000	exon (NM_025314, exon 1 of 6)	exon (NM_025314, exon 1 of 6)	102	NM_025314	66044	Mm.28109	NM_025314	ENSMUSG00000027430	Dtd1	0610006H08Rik|DTD|DUE-B|Hars2	D-tyrosyl-tRNA deacylase 1	protein-coding
282.671	-0.0304318	0.277175	-0.109792	0.912574	0.993944	Cx3cr1WT-Cx3cr1KO	chr11	29547721	29547932	+	1000	promoter-TSS (NM_028504)	promoter-TSS (NM_028504)	-124	NM_028504	73324	Mm.69388	NM_028504	ENSMUSG00000020461	Clhc1	1700034F02Rik	clathrin heavy chain linker domain containing 1	protein-coding
31.968	-0.0721318	0.353892	-0.203824	0.838491	NA	Cx3cr1WT-Cx3cr1KO	chr8	124751692	124751978	+	1000	promoter-TSS (NM_001081120)	promoter-TSS (NM_001081120)	-26	NM_001081120	69627	Mm.271600	NM_001081120	ENSMUSG00000043068	Fam89a	2310031A18Rik	family with sequence similarity 89, member A	protein-coding
71.1541	0.071969	0.349842	0.205718	0.837011	0.991565	Cx3cr1WT-Cx3cr1KO	chrX	57338415	57338680	+	1000	exon (NM_152801, exon 1 of 22)	exon (NM_152801, exon 1 of 22)	182	NM_152801	73341	Mm.261443	NM_152801	ENSMUSG00000031133	Arhgef6	1600028C08Rik|1700038J06Rik|4930592P22Rik|alpha-PIX	Rac/Cdc42 guanine nucleotide exchange factor (GEF) 6	protein-coding
203.498	-0.267029	0.282402	-0.945561	0.344372	0.902562	Cx3cr1WT-Cx3cr1KO	chr11	19924314	19924560	+	1000	promoter-TSS (NM_033523)	promoter-TSS (NM_033523)	-5	NM_033523	114716	Mm.266627	NM_033523	ENSMUSG00000045671	Spred2	C79158	sprouty-related, EVH1 domain containing 2	protein-coding
75.5253	0.00865116	0.356417	0.0242726	0.980635	0.998197	Cx3cr1WT-Cx3cr1KO	chr4	117182620	117182852	+	1000	promoter-TSS (NM_134471)	promoter-TSS (NM_134471)	-112	NM_134471	73804	Mm.247651	NM_134471	ENSMUSG00000028678	Kif2c	4930402F02Rik|ESTM5|Knsl6|MCAK|X83316	kinesin family member 2C	protein-coding
74.2313	-0.163178	0.344534	-0.473618	0.635772	0.966928	Cx3cr1WT-Cx3cr1KO	chr9	119894745	119894990	+	1000	promoter-TSS (NM_026236)	promoter-TSS (NM_026236)	-28	NM_026236	67561	Mm.104789	NM_026236	ENSMUSG00000032512	Wdr48	8430408H12Rik|Uaf1|mKIAA1449	WD repeat domain 48	protein-coding
51.7608	0.263275	0.362343	0.726591	0.467476	0.931076	Cx3cr1WT-Cx3cr1KO	chr9	72985478	72985723	+	1000	promoter-TSS (NM_001114328)	promoter-TSS (NM_001114328)	96	NM_001286544	72278	Mm.268475	NM_028181	ENSMUSG00000034563	Ccpg1	1700030B06Rik|1810073J13Rik|9430028F23Rik|AI426686|AI875170|CPR8|D9Ertd392e	cell cycle progression 1	protein-coding
165.155	-0.485129	0.323864	-1.49794	0.134149	0.755776	Cx3cr1WT-Cx3cr1KO	chr17	34952325	34952583	+	1000	promoter-TSS (NR_027943)	promoter-TSS (NR_027943)	14	NR_027943	68763	Mm.28895	NR_015536	ENSMUSG00000092203	1110038B12Rik	0610009C20Rik|0910001G04Rik	RIKEN cDNA 1110038B12 gene	ncRNA
35.4929	-0.335324	0.36314	-0.9234	0.355799	NA	Cx3cr1WT-Cx3cr1KO	chr2	30982192	30982436	+	1000	promoter-TSS (NM_144885)	promoter-TSS (NM_144885)	35	NM_028846	74270	Mm.346654	NM_028846	ENSMUSG00000026854	Usp20	1700055M05Rik|AI467231|Vdu2	ubiquitin specific peptidase 20	protein-coding
66.9165	-0.440232	0.362958	-1.2129	0.225168	0.854106	Cx3cr1WT-Cx3cr1KO	chr12	87472137	87472357	+	1000	promoter-TSS (NM_025507)	promoter-TSS (NM_025507)	52	NM_025507	66354	Mm.271174	NM_025507	ENSMUSG00000021039	Snw1	2310008B08Rik|AW048543|NCoA-62|SKIP|Skiip	SNW domain containing 1	protein-coding
77.4327	0.0820492	0.352642	0.23267	0.816018	0.990013	Cx3cr1WT-Cx3cr1KO	chr1	75399989	75400255	+	1000	promoter-TSS (NM_001173477)	promoter-TSS (NM_001173477)	37	NM_001173477	11790	Mm.275397	NM_007463	ENSMUSG00000026207	Speg	AW125581|Apeg1|BPEG|D1Bwg1450e|SPEGalpha|SPEGbeta|mKIAA1297	SPEG complex locus	protein-coding
18.4455	-0.424959	0.333657	-1.27364	0.202791	NA	Cx3cr1WT-Cx3cr1KO	chr4	107367735	107367986	+	1000	promoter-TSS (NM_028355)	promoter-TSS (NM_028355)	76	NM_028355	72787	Mm.28478	NM_028355	ENSMUSG00000028614	Ndc1	2810475A17Rik|AI450313|Tmem48|sks	NDC1 transmembrane nucleoporin	protein-coding
162.483	0.103174	0.291741	0.353649	0.723602	0.981655	Cx3cr1WT-Cx3cr1KO	chr4	144892151	144892408	+	1000	promoter-TSS (NM_001172424)	promoter-TSS (NM_001172424)	-548	NM_001172424	20148	Mm.14063	NM_011303	ENSMUSG00000066026	Dhrs3	Rsdr1|retSDR1	dehydrogenase/reductase (SDR family) member 3	protein-coding
30.2018	-0.47873	0.360197	-1.32908	0.183822	NA	Cx3cr1WT-Cx3cr1KO	chr17	65783817	65784057	+	1000	intron (NR_152099, intron 2 of 20)	CpG-6545	582	NR_104465	70351	Mm.48686	NM_146081	ENSMUSG00000061950	Ppp4r1	3110001J10Rik|Pp4r1	protein phosphatase 4, regulatory subunit 1	protein-coding
37.9765	0.26332	0.363519	0.724363	0.468843	NA	Cx3cr1WT-Cx3cr1KO	chr11	86257508	86257727	+	1000	promoter-TSS (NM_027421)	promoter-TSS (NM_027421)	-49	NM_027421	70422	Mm.171304	NM_027421	ENSMUSG00000018068	Ints2	2810417D08Rik|AA408260|AI987735|mKIAA1287	integrator complex subunit 2	protein-coding
153.024	-0.355629	0.29566	-1.20283	0.229041	0.854106	Cx3cr1WT-Cx3cr1KO	chr7	44986182	44986427	+	1000	promoter-TSS (NR_045266)	promoter-TSS (NR_045266)	116	NM_001252476	15469	Mm.27545	NM_019830	ENSMUSG00000109324	Prmt1	6720434D09Rik|AW214366|Hrmt1l2|Mrmt1	protein arginine N-methyltransferase 1	protein-coding
158.041	1.34607	0.304862	4.41536	1.00843e-05	0.0102885	Cx3cr1WT-Cx3cr1KO	chr10	80676228	80676428	+	1000	promoter-TSS (NM_021462)	promoter-TSS (NM_021462)	-35	NM_021462	17347	Mm.42126	NM_021462	ENSMUSG00000020190	Mknk2	2010016G11Rik|Gprk7|Mnk2	MAP kinase-interacting serine/threonine kinase 2	protein-coding
141.524	0.134294	0.319643	0.420138	0.674384	0.9758	Cx3cr1WT-Cx3cr1KO	chr11	6267632	6268013	+	1000	promoter-TSS (NM_026538)	promoter-TSS (NM_026538)	-93	NM_026538	52513	Mm.29810	NM_026538	ENSMUSG00000004393	Ddx56	2600001H07Rik|D11Ertd619e|Noh61	DEAD (Asp-Glu-Ala-Asp) box polypeptide 56	protein-coding
185.211	0.460034	0.279985	1.64307	0.100369	0.702585	Cx3cr1WT-Cx3cr1KO	chr2	155381576	155381885	+	1000	promoter-TSS (NM_178111)	promoter-TSS (NM_178111)	-126	NM_178111	68728	Mm.293605	NM_178111	ENSMUSG00000038375	Trp53inp2	1110029F20Rik|Tp53inp2	transformation related protein 53 inducible nuclear protein 2	protein-coding
79.5369	-0.0560779	0.36359	-0.154234	0.877425	0.993944	Cx3cr1WT-Cx3cr1KO	chr14	62332316	62332528	+	1000	intron (NM_026001, intron 1 of 10)	CpG	354	NM_026001	67153	Mm.26040	NM_026001	ENSMUSG00000021932	Rnaseh2b	1110019N06Rik|2610207P08Rik|Dleu8	ribonuclease H2, subunit B	protein-coding
71.6778	0.40487	0.350438	1.15533	0.247956	0.860364	Cx3cr1WT-Cx3cr1KO	chr8	105855008	105855303	+	1000	promoter-TSS (NM_021513)	promoter-TSS (NM_021513)	52	NM_021513	59016	Mm.286598	NM_021513	ENSMUSG00000036442	Thap11	2810036E22Rik|AB041579|CTG-B43a|CTG-B45d|Ronin	THAP domain containing 11	protein-coding
176.882	0.179126	0.278027	0.644275	0.519397	0.946726	Cx3cr1WT-Cx3cr1KO	chr1	72711156	72711451	+	1000	promoter-TSS (NM_009084)	promoter-TSS (NM_009084)	43	NM_009084	19981	Mm.21529	NM_009084	ENSMUSG00000046330	Rpl37a	-	ribosomal protein L37a	protein-coding
170.443	0.216675	0.311644	0.695263	0.486891	0.931515	Cx3cr1WT-Cx3cr1KO	chr15	79687894	79688103	+	1000	promoter-TSS (NM_028792)	promoter-TSS (NM_028792)	-126	NM_028792	74158	Mm.323393	NM_028792	ENSMUSG00000022426	Josd1	1300006C06Rik|mKIAA0063	Josephin domain containing 1	protein-coding
89.1861	0.238267	0.345052	0.690525	0.489864	0.933101	Cx3cr1WT-Cx3cr1KO	chr11	60222836	60223146	+	1000	promoter-TSS (NM_001358315)	promoter-TSS (NM_001358315)	-410	NM_001358315	20787	Mm.278701	NM_011480	ENSMUSG00000020538	Srebf1	ADD1|SREBP1|bHLHd1	sterol regulatory element binding transcription factor 1	protein-coding
112.453	-0.200332	0.328825	-0.609236	0.542368	0.949348	Cx3cr1WT-Cx3cr1KO	chr2	104590390	104590654	+	1000	promoter-TSS (NM_177253)	promoter-TSS (NM_177253)	38	NM_001037326	228410	Mm.259876	NM_145529	ENSMUSG00000027176	Cstf3	4732468G05Rik|C79532|CstF-77	cleavage stimulation factor, 3' pre-RNA, subunit 3	protein-coding
75.9531	-0.439008	0.354231	-1.23933	0.215225	0.852603	Cx3cr1WT-Cx3cr1KO	chr13	102694213	102694482	+	1000	intron (NM_001360519, intron 1 of 2)	intron (NM_001360519, intron 1 of 2)	789	NM_008533	17079	Mm.373974	NM_008533	ENSMUSG00000021624	Cd180	F630107B15|Ly-78|Ly78|RP105	CD180 antigen	protein-coding
123.98	0.00140329	0.313134	0.00448145	0.996424	0.999755	Cx3cr1WT-Cx3cr1KO	chr5	110653368	110653627	+	1000	promoter-TSS (NM_027156)	promoter-TSS (NM_027156)	46	NM_027156	69663	Mm.5267	NM_027156	ENSMUSG00000029504	Ddx51	2310061O04Rik|AA537002|C81583|R75505	DEAD (Asp-Glu-Ala-Asp) box polypeptide 51	protein-coding
66.4541	0.160194	0.350712	0.456769	0.647837	0.970923	Cx3cr1WT-Cx3cr1KO	chr15	76368818	76369024	+	1000	promoter-TSS (NM_021555)	promoter-TSS (NM_021555)	23	NM_021555	59053	Mm.133202	NM_021555	ENSMUSG00000022554	Hgh1	Brp16|D15Ertd741e|Fam203a|MNCb-5873	HGH1 homolog	protein-coding
103.145	-0.176962	0.337687	-0.524043	0.600249	0.958557	Cx3cr1WT-Cx3cr1KO	chr2	166446535	166446736	+	1000	promoter-TSS (NR_015558)	promoter-TSS (NR_015558)	-816	NR_015558	319684	Mm.399746	NR_015558		5031425F14Rik	-	RIKEN cDNA 5031425F14 gene	ncRNA
52.6987	-0.0986316	0.189368	-0.520845	0.602474	0.958557	Cx3cr1WT-Cx3cr1KO	chr5	151368872	151369143	+	1000	intron (NR_045700, intron 1 of 3)	CpG	332	NR_045699	625175	Mm.443286	NR_045699	ENSMUSG00000097321	1700028E10Rik	A630054D14|Gm6561	RIKEN cDNA 1700028E10 gene	ncRNA
122.49	0.245775	0.313029	0.785152	0.432364	0.923458	Cx3cr1WT-Cx3cr1KO	chr15	76701407	76701682	+	1000	promoter-TSS (NM_027122)	promoter-TSS (NM_027122)	2	NM_027122	69572	Mm.34920	NM_027122	ENSMUSG00000019080	Mfsd3	2310010G13Rik	major facilitator superfamily domain containing 3	protein-coding
216.246	-0.588835	0.2869	-2.05241	0.04013	0.536174	Cx3cr1WT-Cx3cr1KO	chr1	90915005	90915286	+	1000	promoter-TSS (NM_053015)	promoter-TSS (NM_053015)	45	NM_053015	171531	Mm.105208	NM_053015	ENSMUSG00000026303	Mlph	2210418F23Rik|5031433I09Rik|AW228792|D1Wsu84e|Slac-2a|l(1)-3Rk|l1Rk3|ln	melanophilin	protein-coding
180.192	-0.179156	0.316457	-0.566132	0.571304	0.953728	Cx3cr1WT-Cx3cr1KO	chr13	23585013	23585285	+	1000	TTS (NM_001290530)	TTS (NM_001290530)	821	NM_001290530	319179	Mm.440391	NM_178194	ENSMUSG00000047246	Hist1h2be	-	histone cluster 1, H2be	protein-coding
333.791	0.0562318	0.224194	0.250818	0.801955	0.98788	Cx3cr1WT-Cx3cr1KO	chr11	120348325	120348544	+	1000	promoter-TSS (NR_038126)	promoter-TSS (NR_038126)	61	NM_001313923	11465	Mm.196173	NM_009609	ENSMUSG00000062825	Actg1	AL023024|Actg|Actl|E51	actin, gamma, cytoplasmic 1	protein-coding
78.3804	-0.0065021	0.342818	-0.0189666	0.984868	0.998197	Cx3cr1WT-Cx3cr1KO	chr6	88627350	88627675	+	1000	promoter-TSS (NM_001278671)	promoter-TSS (NM_001278671)	-64	NM_001278671	74589	Mm.196226	NM_029013	ENSMUSG00000033182	Kbtbd12	4833415F11Rik|4933428M03Rik|Klhdc6	kelch repeat and BTB (POZ) domain containing 12	protein-coding
43.6289	0.250611	0.362738	0.690886	0.489637	NA	Cx3cr1WT-Cx3cr1KO	chr17	27622720	27623052	+	1000	promoter-TSS (NM_001291046)	promoter-TSS (NM_001291046)	78	NM_001291046	56409	Mm.144699	NM_019837	ENSMUSG00000024213	Nudt3	1110011B09Rik|AA960325|Dipp|Dipp1	nudix (nucleotide diphosphate linked moiety X)-type motif 3	protein-coding
69.2071	0.0565844	0.351197	0.161119	0.872	0.993944	Cx3cr1WT-Cx3cr1KO	chr4	133753814	133754030	+	1000	promoter-TSS (NM_001080819)	promoter-TSS (NM_001080819)	-311	NM_001080819	93760	Mm.22478	NM_001080819	ENSMUSG00000007880	Arid1a	1110030E03Rik|BAF250a|Osa1|Smarcf1	AT rich interactive domain 1A (SWI-like)	protein-coding
186.189	-0.445507	0.305068	-1.46035	0.144194	0.772977	Cx3cr1WT-Cx3cr1KO	chr7	126792308	126792573	+	1000	promoter-TSS (NM_001360464)	promoter-TSS (NM_001360464)	-76	NM_001360464	56420	Mm.41998	NM_019674	ENSMUSG00000030697	Ppp4c	1110002D08Rik|AU016079|PP-X|PP4C|Ppx|pp4	protein phosphatase 4, catalytic subunit	protein-coding
88.4906	0.662347	0.33781	1.96071	0.0499131	0.565495	Cx3cr1WT-Cx3cr1KO	chr1	134415639	134415948	+	1000	5' UTR (NM_001306069, exon 1 of 8)	5' UTR (NM_001306069, exon 1 of 8)	129	NM_001306069	72674	Mm.259976	NM_028320	ENSMUSG00000026457	Adipor1	2810031L11Rik|ACDCR1|CGI-45|Paqr1	adiponectin receptor 1	protein-coding
176.95	0.534013	0.297299	1.79621	0.0724605	0.637069	Cx3cr1WT-Cx3cr1KO	chr6	32511051	32511294	+	1000	promoter-TSS (NR_040277)	promoter-TSS (NR_040277)	31	NR_040277	319849	Mm.440860	NR_040277	ENSMUSG00000086763	Plxna4os1	B230378P21Rik	plexin A4, opposite strand 1	ncRNA
107.329	-0.25405	0.337598	-0.752521	0.451738	0.930354	Cx3cr1WT-Cx3cr1KO	chr5	124552621	124552879	+	1000	promoter-TSS (NM_026409)	promoter-TSS (NM_026409)	-114	NM_001190795	67848	Mm.281601	NM_026409	ENSMUSG00000029389	Ddx55	2810021H22Rik|mKIAA1595	DEAD (Asp-Glu-Ala-Asp) box polypeptide 55	protein-coding
72.0461	-0.516508	0.358581	-1.44042	0.149748	0.778498	Cx3cr1WT-Cx3cr1KO	chr5	77310384	77310614	+	1000	promoter-TSS (NM_153798)	promoter-TSS (NM_153798)	15	NM_153798	231329	Mm.273217	NM_153798	ENSMUSG00000029250	Polr2b	Pol2rb|Rpb140|Rpb2	polymerase (RNA) II (DNA directed) polypeptide B	protein-coding
317.85	-0.122331	0.240116	-0.509466	0.610426	0.958833	Cx3cr1WT-Cx3cr1KO	chr7	125603546	125603766	+	1000	5' UTR (NM_021887, exon 1 of 9)	5' UTR (NM_021887, exon 1 of 9)	227	NM_021887	60504	Mm.155643	NM_021887	ENSMUSG00000030745	Il21r	NILR	interleukin 21 receptor	protein-coding
67.0024	0.0649984	0.356293	0.18243	0.855245	0.993786	Cx3cr1WT-Cx3cr1KO	chr9	54863658	54863950	+	1000	promoter-TSS (NM_022655)	promoter-TSS (NM_022655)	49	NM_022655	64602	Mm.208991	NM_022655	ENSMUSG00000032293	Ireb2	D9Ertd85e|Irp2	iron responsive element binding protein 2	protein-coding
479.081	-0.067823	0.201152	-0.337174	0.735986	0.98239	Cx3cr1WT-Cx3cr1KO	chr2	84425263	84425548	+	1000	promoter-TSS (NM_018782)	promoter-TSS (NM_018782)	-139	NM_018782	54598	Mm.75467	NM_018782	ENSMUSG00000059588	Calcrl	AV071593|CRLR	calcitonin receptor-like	protein-coding
260.322	-0.0247888	0.2569	-0.0964921	0.92313	0.994647	Cx3cr1WT-Cx3cr1KO	chr1	155145771	155146010	+	1000	intron (NM_008209, intron 1 of 5)	intron (NM_008209, intron 1 of 5)	924	NM_001355063	15064	Mm.7580	NM_008209	ENSMUSG00000026471	Mr1	H2ls	major histocompatibility complex, class I-related	protein-coding
265.037	-0.213592	0.250515	-0.852611	0.393875	0.914739	Cx3cr1WT-Cx3cr1KO	chr17	15826372	15826632	+	1000	promoter-TSS (NM_178615)	promoter-TSS (NM_178615)	84	NM_178615	68799	Mm.293466	NM_178615	ENSMUSG00000048027	Rgmb	1110059F19Rik|DRAGON	repulsive guidance molecule family member B	protein-coding
260.299	-0.0312137	0.250285	-0.124712	0.900751	0.993944	Cx3cr1WT-Cx3cr1KO	chr10	117710516	117710764	+	1000	5' UTR (NM_001288586, exon 1 of 11)	5' UTR (NM_001288586, exon 1 of 11)	118	NM_010786	17246	Mm.22670	NM_010786	ENSMUSG00000020184	Mdm2	1700007J15Rik|AA415488|Mdm-2	transformed mouse 3T3 cell double minute 2	protein-coding
308.776	-0.235875	0.237369	-0.993706	0.320366	0.898815	Cx3cr1WT-Cx3cr1KO	chr5	33018493	33018704	+	1000	promoter-TSS (NM_011738)	promoter-TSS (NM_011738)	-218	NM_011738	22629	Mm.332314	NM_011738	ENSMUSG00000018965	Ywhah	-	tyrosine 3-monooxygenase/tryptophan 5-monooxygenase activation protein, eta polypeptide	protein-coding
161.772	-0.295811	0.299645	-0.987206	0.323542	0.900571	Cx3cr1WT-Cx3cr1KO	chr10	80115289	80115526	+	1000	promoter-TSS (NM_011492)	promoter-TSS (NM_011492)	-396	NM_001301853	20869	Mm.44231	NM_011492	ENSMUSG00000003068	Stk11	AA408040|Lkb1|Par-4|R75140	serine/threonine kinase 11	protein-coding
65.5637	-0.549787	0.361346	-1.52149	0.128136	0.7473	Cx3cr1WT-Cx3cr1KO	chr5	137116055	137116419	+	1000	promoter-TSS (NM_201373)	promoter-TSS (NM_201373)	-30	NM_201373	384309	Mm.100647	NM_201373	ENSMUSG00000043279	Trim56	A130009K11Rik|Gm452|RNF109	tripartite motif-containing 56	protein-coding
173.978	0.206682	0.30577	0.675941	0.499078	0.937596	Cx3cr1WT-Cx3cr1KO	chr9	51076950	51077178	+	1000	promoter-TSS (NM_001033534)	promoter-TSS (NM_001033534)	30	NM_001033534	244864	Mm.335152	NM_001033534	ENSMUSG00000060594	Layn	E030012M19Rik|Gm511	layilin	protein-coding
68.1074	0.181882	0.357528	0.508722	0.610947	0.958833	Cx3cr1WT-Cx3cr1KO	chr17	12119036	12119296	+	1000	promoter-TSS (NM_026644)	promoter-TSS (NM_026644)	-118	NM_026644	68262	Mm.258300	NM_026644	ENSMUSG00000023827	Agpat4	1500003P24Rik	1-acylglycerol-3-phosphate O-acyltransferase 4 (lysophosphatidic acid acyltransferase, delta)	protein-coding
57.2587	-0.258479	0.360529	-0.716944	0.473409	0.931076	Cx3cr1WT-Cx3cr1KO	chr18	33464048	33464303	+	1000	promoter-TSS (NR_045415)	promoter-TSS (NR_045415)	12	NR_045415	433171	Mm.353332	NR_045415		Gm10549	-	predicted gene 10549	ncRNA
32.7336	-0.238525	0.362563	-0.657885	0.510612	NA	Cx3cr1WT-Cx3cr1KO	chr1	119913001	119913247	+	1000	promoter-TSS (NM_175106)	promoter-TSS (NM_175106)	44	NM_175106	66343	Mm.49942	NM_175106	ENSMUSG00000036975	Tmem177	2300008B03Rik	transmembrane protein 177	protein-coding
40.2181	0.388802	0.360984	1.07706	0.281453	NA	Cx3cr1WT-Cx3cr1KO	chr7	30944405	30944686	+	1000	promoter-TSS (NM_032541)	promoter-TSS (NM_032541)	-516	NM_032541	84506	Mm.439939	NM_032541	ENSMUSG00000050440	Hamp	Hamp1|Hepc|Hepc1	hepcidin antimicrobial peptide	protein-coding
34.5577	-0.502272	0.363008	-1.38364	0.166468	NA	Cx3cr1WT-Cx3cr1KO	chr19	17356493	17356723	+	1000	promoter-TSS (NM_173442)	promoter-TSS (NM_173442)	59	NM_173442	14537	Mm.244825	NM_010265	ENSMUSG00000038843	Gcnt1	5630400D21Rik|B130048E03|C2 GlcNAcT|C2GNT|IGnT	glucosaminyl (N-acetyl) transferase 1, core 2	protein-coding
118.663	0.241891	0.31169	0.776062	0.437712	0.925546	Cx3cr1WT-Cx3cr1KO	chr5	143548667	143548890	+	1000	promoter-TSS (NM_026050)	promoter-TSS (NM_026050)	72	NM_026050	67238	Mm.383219	NM_026050	ENSMUSG00000083012	Fam220a	1500026F15Rik|2810453I06Rik|AW047776|Acpin1|Sipar	family with sequence similarity 220, member A	protein-coding
117.9	0.273042	0.317935	0.858796	0.390453	0.914739	Cx3cr1WT-Cx3cr1KO	chr3	88177635	88177906	+	1000	promoter-TSS (NR_045997)	promoter-TSS (NR_045997)	15	NR_045997	76642	Mm.424420	NR_045997	ENSMUSG00000096935	1700113A16Rik	2210408E11Rik|AA408983	RIKEN cDNA 1700113A16 gene	ncRNA
59.0575	0.422245	0.362898	1.16354	0.244611	0.860364	Cx3cr1WT-Cx3cr1KO	chr17	80373321	80373570	+	1000	promoter-TSS (NR_028385)	promoter-TSS (NR_028385)	97	NR_028385	791338	Mm.204722	NR_028385		Gm10190	-	predicted gene 10190	ncRNA
52.1704	-0.103856	0.360844	-0.287815	0.773489	0.984741	Cx3cr1WT-Cx3cr1KO	chr9	44920529	44920774	+	1000	promoter-TSS (NM_013795)	promoter-TSS (NM_013795)	91	NM_013795	27425	Mm.14663	NM_013795	ENSMUSG00000038717	Atp5l	4933437C06Rik	ATP synthase, H+ transporting, mitochondrial F0 complex, subunit G	protein-coding
312.136	-0.507074	0.266273	-1.90433	0.0568666	0.589127	Cx3cr1WT-Cx3cr1KO	chr8	70510352	70510629	+	1000	promoter-TSS (NM_001348229)	promoter-TSS (NM_001348229)	4	NR_151735	78183	Mm.297372	NR_151735		4930522P08Rik	-	RIKEN cDNA 4930522P08 gene	ncRNA
76.2008	-0.174911	0.346307	-0.505075	0.613506	0.95928	Cx3cr1WT-Cx3cr1KO	chr9	108306356	108306573	+	1000	promoter-TSS (NM_001313961)	promoter-TSS (NM_001313961)	304	NM_016802	11848	Mm.757	NM_016802	ENSMUSG00000007815	Rhoa	Arha|Arha1|Arha2	ras homolog family member A	protein-coding
131.08	0.143985	0.321317	0.448108	0.654076	0.971379	Cx3cr1WT-Cx3cr1KO	chr7	125707550	125707775	+	1000	promoter-TSS (NM_207239)	promoter-TSS (NM_207239)	26	NM_207239	233863	Mm.294173	NM_207239	ENSMUSG00000032777	Gtf3c1	-	general transcription factor III C 1	protein-coding
37.3034	-0.368194	0.363444	-1.01307	0.311028	NA	Cx3cr1WT-Cx3cr1KO	chr4	115058270	115058514	+	1000	intron (NM_001287388, intron 1 of 4)	intron (NM_001287388, intron 1 of 4)	581	NM_001287388	21349	Mm.239869	NM_011527	ENSMUSG00000028717	Tal1	Hpt|SCL/tal-1|Scl|bHLHa17|tal-1	T cell acute lymphocytic leukemia 1	protein-coding
52.5029	0.0155594	0.358929	0.0433495	0.965423	0.998197	Cx3cr1WT-Cx3cr1KO	chr4	126467759	126468111	+	1000	intron (NM_153403, intron 1 of 18)	intron (NM_153403, intron 1 of 18)	648	NM_001317174	236511	Mm.30800	NM_153403	ENSMUSG00000041530	Ago1	Eif2c1	argonaute RISC catalytic subunit 1	protein-coding
23.5502	-0.470815	0.351051	-1.34116	0.17987	NA	Cx3cr1WT-Cx3cr1KO	chr8	25994009	25994261	+	1000	promoter-TSS (NM_029037)	promoter-TSS (NM_029037)	-14	NM_029037	74653	Mm.17631	NM_029037	ENSMUSG00000037251	Pomk	4930444A02Rik|Sgk196	protein-O-mannose kinase	protein-coding
48.5301	0.471944	0.362355	1.30243	0.192768	0.829282	Cx3cr1WT-Cx3cr1KO	chr8	70282779	70283123	+	1000	promoter-TSS (NM_011984)	promoter-TSS (NM_011984)	-48	NM_011984	26558	Mm.388127	NM_011984	ENSMUSG00000003573	Homer3	AW146114	homer scaffolding protein 3	protein-coding
60.6287	-0.112201	0.35701	-0.31428	0.753308	0.983288	Cx3cr1WT-Cx3cr1KO	chr9	96719374	96719594	+	1000	promoter-TSS (NM_001359960)	promoter-TSS (NM_001359960)	-39	NM_001359960	245007	Mm.485954	NM_175537	ENSMUSG00000040433	Zbtb38	A930014K01Rik|CIBZ	zinc finger and BTB domain containing 38	protein-coding
72.4733	-0.145337	0.346346	-0.41963	0.674756	0.9758	Cx3cr1WT-Cx3cr1KO	chr17	88530235	88530442	+	1000	intron (NM_028658, intron 1 of 21)	intron (NM_028658, intron 1 of 21)	214	NM_028658	73825	Mm.271817	NM_028658	ENSMUSG00000034709	Ppp1r21	1110018J12Rik|AI426045|AW550781|Ccdc128|Klraq1	protein phosphatase 1, regulatory subunit 21	protein-coding
85.3494	0.0973775	0.342856	0.284019	0.776396	0.98615	Cx3cr1WT-Cx3cr1KO	chr11	109425949	109426151	+	1000	promoter-TSS (NM_001252193)	promoter-TSS (NM_001252193)	104	NM_025275	13929	Mm.211850	NM_025275	ENSMUSG00000020610	Amz2	AA408420|ESTM12|X83328	archaelysin family metallopeptidase 2	protein-coding
35.2654	-0.317794	0.359866	-0.883088	0.377189	NA	Cx3cr1WT-Cx3cr1KO	chr7	97082227	97082489	+	1000	intron (NM_001162477, intron 1 of 9)	CpG	607	NM_010248	14389	Mm.42033	NM_010248	ENSMUSG00000004508	Gab2	AI463667|D130058I17Rik|p97	growth factor receptor bound protein 2-associated protein 2	protein-coding
69.111	-0.454664	0.357574	-1.27152	0.203542	0.839604	Cx3cr1WT-Cx3cr1KO	chr11	51619690	51619978	+	1000	promoter-TSS (NM_026631)	promoter-TSS (NM_026631)	61	NM_026631	52530	Mm.28203	NM_026631	ENSMUSG00000001056	Nhp2	2410130M07Rik|D11Ertd175e|Nola2	NHP2 ribonucleoprotein	protein-coding
186.214	-0.181281	0.320429	-0.565747	0.571566	0.953728	Cx3cr1WT-Cx3cr1KO	chr9	106429466	106429677	+	1000	5' UTR (NM_001324534, exon 1 of 3)	5' UTR (NM_001324534, exon 1 of 3)	160	NM_009082	19944	Mm.288696	NM_009082	ENSMUSG00000048758	Rpl29	Rpl43	ribosomal protein L29	protein-coding
133.308	-0.799607	0.328258	-2.43591	0.0148543	0.393506	Cx3cr1WT-Cx3cr1KO	chr10	62602202	62602466	+	1000	promoter-TSS (NM_019553)	promoter-TSS (NM_019553)	-36	NM_019553	56200	Mm.413275	NM_019553	ENSMUSG00000020075	Ddx21	AI255159|AL022742|D10Ertd645e|D10Wsu42e	DEAD (Asp-Glu-Ala-Asp) box polypeptide 21	protein-coding
50.0353	0.945082	0.363587	2.59932	0.00934073	0.334382	Cx3cr1WT-Cx3cr1KO	chr4	94602961	94603262	+	1000	5' UTR (NM_172695, exon 1 of 14)	5' UTR (NM_172695, exon 1 of 14)	136	NM_172695	18786	Mm.490101	NM_172695	ENSMUSG00000028577	Plaa	2410007N06|AI536418|AU018445|AW208417|D4Ertd618e|PLA2P|PLAP|Ufd3	phospholipase A2, activating protein	protein-coding
108.775	0.225074	0.321456	0.700168	0.483822	0.931076	Cx3cr1WT-Cx3cr1KO	chr7	120842788	120843064	+	1000	promoter-TSS (NM_007908)	promoter-TSS (NM_007908)	95	NM_007908	13631	Mm.25997	NM_007908	ENSMUSG00000035064	Eef2k	C86191|eEF-2K	eukaryotic elongation factor-2 kinase	protein-coding
128.313	-0.222575	0.317601	-0.700802	0.483426	0.931076	Cx3cr1WT-Cx3cr1KO	chr11	106752070	106752350	+	1000	intron (NM_001033435, intron 2 of 6)	intron (NM_001033435, intron 2 of 6)	984	NM_001033435	380732	Mm.343952	NM_001033435	ENSMUSG00000040528	Milr1	Allergin-1|Gm885|Mca32	mast cell immunoglobulin like receptor 1	protein-coding
48.3805	-0.389877	0.3617	-1.0779	0.281078	0.882062	Cx3cr1WT-Cx3cr1KO	chr11	77515804	77516015	+	1000	exon (NM_026185, exon 1 of 2)	exon (NM_026185, exon 1 of 2)	792	NM_026185	67477	Mm.432526	NM_026185	ENSMUSG00000000686	Abhd15	1300007F04Rik	abhydrolase domain containing 15	protein-coding
286.737	-0.270496	0.235745	-1.14741	0.251211	0.860364	Cx3cr1WT-Cx3cr1KO	chr7	45395542	45395758	+	1000	promoter-TSS (NM_009224)	promoter-TSS (NM_009224)	92	NM_009224	20637	Mm.216386	NM_009224	ENSMUSG00000063511	Snrnp70	2700022N21Rik|3200002N22Rik|AI325098|R74807|Rnu1p70|Rnulp70|Snrp70|Srnp70|U1-70|U1-70K	small nuclear ribonucleoprotein 70 (U1)	protein-coding
527.888	-0.154664	0.197567	-0.782845	0.433718	0.923802	Cx3cr1WT-Cx3cr1KO	chr11	106500843	106501069	+	1000	promoter-TSS (NR_030703)	promoter-TSS (NR_030703)	-35	NR_030703	100216537		NR_030703	ENSMUSG00000065126	Snord104	-	small nucleolar RNA, C/D box 104	snoRNA
132.162	-0.175791	0.308862	-0.569157	0.56925	0.953728	Cx3cr1WT-Cx3cr1KO	chr16	97962133	97962341	+	1000	intron (NM_175428, intron 1 of 2)	CpG	385	NM_001081685	114565	Mm.474489	NM_175428	ENSMUSG00000046962	Zbtb21	5430437K12Rik|B430213I24Rik|Zfp295|Znf295|mKIAA1227	zinc finger and BTB domain containing 21	protein-coding
31.5773	-0.417013	0.355942	-1.17158	0.241367	NA	Cx3cr1WT-Cx3cr1KO	chr4	155891561	155891761	+	1000	promoter-TSS (NM_207223)	promoter-TSS (NM_207223)	101	NM_001033490	433813	Mm.259270	NM_001033490	ENSMUSG00000051557	Pusl1	2810021I11Rik|AI853843|D18346	pseudouridylate synthase-like 1	protein-coding
193.865	-0.497241	0.291559	-1.70546	0.0881094	0.671192	Cx3cr1WT-Cx3cr1KO	chr19	53142700	53142941	+	1000	promoter-TSS (NM_001277100)	promoter-TSS (NM_001277100)	64	NM_001164100	27360	Mm.426080	NM_013758	ENSMUSG00000025026	Add3	AI463285|R75380	adducin 3 (gamma)	protein-coding
30.1413	0.236862	0.361367	0.655461	0.512171	NA	Cx3cr1WT-Cx3cr1KO	chr5	136566415	136566635	+	1000	promoter-TSS (NM_001291233)	promoter-TSS (NM_001291233)	-544	NM_001291233	13047	Mm.320317	NM_009986	ENSMUSG00000029705	Cux1	CDP|Cutl1|Cux|Cux-1	cut-like homeobox 1	protein-coding
158.815	0.127387	0.305725	0.416672	0.676919	0.9758	Cx3cr1WT-Cx3cr1KO	chr12	75596385	75596617	+	1000	promoter-TSS (NM_012024)	promoter-TSS (NM_012024)	-301	NM_012024	26932	Mm.259626	NM_012024	ENSMUSG00000021051	Ppp2r5e	4633401M22Rik|AI449017|B56beta	protein phosphatase 2, regulatory subunit B', epsilon	protein-coding
104.828	-0.641308	0.324649	-1.97539	0.048224	0.560141	Cx3cr1WT-Cx3cr1KO	chr3	89266488	89266722	+	1000	5' UTR (NM_026767, exon 1 of 2)	5' UTR (NM_026767, exon 1 of 2)	144	NM_026767	68563	Mm.272927	NM_026767	ENSMUSG00000042737	Dpm3	1110001H19Rik|AV117483	dolichyl-phosphate mannosyltransferase polypeptide 3	protein-coding
328.943	0.301958	0.227488	1.32736	0.184389	0.820145	Cx3cr1WT-Cx3cr1KO	chr10	42277468	42277696	+	1000	promoter-TSS (NM_019740)	promoter-TSS (NM_019740)	-840	NM_019740	56484	Mm.338613	NM_019740	ENSMUSG00000048756	Foxo3	1110048B16Rik|2010203A17Rik|C76856|FKHRL1|Fkhr2|Foxo3a	forkhead box O3	protein-coding
90.7943	0.201201	0.34695	0.579913	0.561974	0.953728	Cx3cr1WT-Cx3cr1KO	chr5	25498586	25498806	+	1000	promoter-TSS (NM_001081383)	promoter-TSS (NM_001081383)	87	NM_001081383	231051	Mm.332268	NM_001081383	ENSMUSG00000038056	Kmt2c	E330008K23Rik|HALR|Mll3|mKIAA1506	lysine (K)-specific methyltransferase 2C	protein-coding
120.363	0.00358231	0.312104	0.0114779	0.990842	0.999755	Cx3cr1WT-Cx3cr1KO	chr7	127421872	127422096	+	1000	promoter-TSS (NM_026999)	promoter-TSS (NM_026999)	50	NM_026999	69234	Mm.20301	NM_026999	ENSMUSG00000045251	Zfp688	2810407K09Rik|AI326029	zinc finger protein 688	protein-coding
105.517	-0.0224154	0.326786	-0.0685935	0.945313	0.996679	Cx3cr1WT-Cx3cr1KO	chr11	57801275	57801516	+	1000	promoter-TSS (NR_131042)	promoter-TSS (NR_131042)	72	NR_131042	76516	Mm.28485	NR_131042	ENSMUSG00000087165	2010001A14Rik	-	RIKEN cDNA 2010001A14 gene	ncRNA
320.101	-0.039864	0.235134	-0.169538	0.865374	0.993944	Cx3cr1WT-Cx3cr1KO	chr12	8921987	8922235	+	1000	exon (NM_008640, exon 1 of 7)	exon (NM_008640, exon 1 of 7)	804	NM_008640	17775	Mm.30071	NM_008640	ENSMUSG00000020585	Laptm4a	AA286466|LAPTM4|MTP|Mtrp|mKIAA0108	lysosomal-associated protein transmembrane 4A	protein-coding
131.317	-0.517237	0.309387	-1.67182	0.0945607	0.686261	Cx3cr1WT-Cx3cr1KO	chr15	79328026	79328275	+	1000	5' UTR (NM_001199024, exon 1 of 16)	5' UTR (NM_001199024, exon 1 of 16)	221	NM_016915	53357	Mm.155620	NM_016915	ENSMUSG00000042632	Pla2g6	BB112799|PNPLA9|iPLA(2)beta|iPLA2|iPLA2beta	phospholipase A2, group VI	protein-coding
32.8298	-0.0704143	0.196115	-0.359045	0.719561	NA	Cx3cr1WT-Cx3cr1KO	chr11	107131297	107131570	+	1000	exon (NM_176850, exon 1 of 28)	exon (NM_176850, exon 1 of 28)	489	NM_176850	207165	Mm.343986	NM_176850	ENSMUSG00000040481	Bptf	9430093H17Rik|Falz	bromodomain PHD finger transcription factor	protein-coding
47.1755	-0.0555201	0.363359	-0.152797	0.878558	0.993944	Cx3cr1WT-Cx3cr1KO	chr6	124857031	124857237	+	1000	intron (NM_013534, intron 1 of 14)	CpG	553	NM_013534	14789	Mm.35708	NM_013534	ENSMUSG00000023191	P3h3	BC016431|Grcb|Leprel2	prolyl 3-hydroxylase 3	protein-coding
76.4816	0.153925	0.347109	0.443449	0.657441	0.972029	Cx3cr1WT-Cx3cr1KO	chr11	115765366	115765661	+	1000	promoter-TSS (NM_028014)	promoter-TSS (NM_028014)	80	NM_028014	71947	Mm.23168	NM_028014	ENSMUSG00000020747	Tmem94	2310067B10Rik|Kiaa0195|mKIAA0195	transmembrane protein 94	protein-coding
85.7707	0.0891117	0.352348	0.252908	0.800339	0.98788	Cx3cr1WT-Cx3cr1KO	chr15	102203172	102203436	+	1000	promoter-TSS (NM_001289694)	promoter-TSS (NM_001289694)	-341	NM_001289694	68744	Mm.352945	NM_153194	ENSMUSG00000046897	Zfp740	1110034O07Rik|AW548228|Znf740	zinc finger protein 740	protein-coding
179.437	-0.17406	0.281078	-0.619256	0.535748	0.947185	Cx3cr1WT-Cx3cr1KO	chr4	11321986	11322185	+	1000	promoter-TSS (NM_001081201)	promoter-TSS (NM_001081201)	46	NM_001081201	381510	Mm.331486	NM_001081201	ENSMUSG00000045205	Dpy19l4	Gm1023|Narg3	dpy-19-like 4 (C. elegans)	protein-coding
249.473	-0.0584408	0.288498	-0.202569	0.839472	0.992184	Cx3cr1WT-Cx3cr1KO	chr11	69665962	69666188	+	1000	promoter-TSS (NM_001291058)	promoter-TSS (NM_001291058)	95	NM_001291058	12514	Mm.15819	NM_009853	ENSMUSG00000018774	Cd68	Lamp4|Scard1|gp110	CD68 antigen	protein-coding
146.716	0.134236	0.3109	0.431765	0.665913	0.97418	Cx3cr1WT-Cx3cr1KO	chr10	79927517	79927836	+	1000	intron (NM_001288625, intron 1 of 8)	CpG	335	NM_001288625	13496	Mm.301282	NM_007880	ENSMUSG00000019564	Arid3a	Bright|Dri1|Dril1	AT rich interactive domain 3A (BRIGHT-like)	protein-coding
237.126	0.398783	0.2707	1.47315	0.140709	0.77014	Cx3cr1WT-Cx3cr1KO	chr2	30237535	30237879	+	1000	promoter-TSS (NR_028299)	promoter-TSS (NR_028299)	-62	NM_177725	241296	Mm.389232	NM_177725	ENSMUSG00000007476	Lrrc8a	Lrrc8|mKIAA1437	leucine rich repeat containing 8A	protein-coding
78.8368	-0.15609	0.34918	-0.447018	0.654862	0.971379	Cx3cr1WT-Cx3cr1KO	chr3	19162903	19163141	+	1000	promoter-TSS (NM_028840)	promoter-TSS (NM_028840)	73	NM_028840	74252	Mm.200383	NM_028840	ENSMUSG00000027599	Armc1	2310016N05Rik|2900046P06Rik|3110009G21Rik|AA409258|AW048872|Arcp|C330014L16Rik	armadillo repeat containing 1	protein-coding
110.371	0.600797	0.325534	1.84558	0.0649539	0.616076	Cx3cr1WT-Cx3cr1KO	chr12	59061283	59061574	+	1000	promoter-TSS (NM_030057)	promoter-TSS (NM_030057)	44	NM_001306218	78232	Mm.290070	NM_030057	ENSMUSG00000020993	Trappc6b	5830498C14Rik|C79212	trafficking protein particle complex 6B	protein-coding
85.7902	0.117208	0.33717	0.347622	0.728124	0.981655	Cx3cr1WT-Cx3cr1KO	chr6	72355445	72355658	+	1000	promoter-TSS (NM_144916)	promoter-TSS (NM_144916)	68	NM_144916	232086	Mm.491165	NM_144916	ENSMUSG00000055912	Tmem150a	BC014685|Tmem150	transmembrane protein 150A	protein-coding
28.0929	-0.484938	0.355919	-1.3625	0.173042	NA	Cx3cr1WT-Cx3cr1KO	chr9	50616968	50617329	+	1000	promoter-TSS (NM_028300)	promoter-TSS (NM_028300)	-173	NM_028300	72614	Mm.147232	NM_028300	ENSMUSG00000000167	Pih1d2	2700059L22Rik	PIH1 domain containing 2	protein-coding
83.6488	-0.369491	0.338827	-1.0905	0.275493	0.877127	Cx3cr1WT-Cx3cr1KO	chr12	24974846	24975075	+	1000	promoter-TSS (NM_001081378)	promoter-TSS (NM_001081378)	28	NM_001081378	77480	Mm.250641	NM_001081378	ENSMUSG00000036333	Kidins220	3110039L19Rik|AI194387|AI316525|C330002I19Rik|mKIAA1250	kinase D-interacting substrate 220	protein-coding
54.3407	-0.0100082	0.360009	-0.0277998	0.977822	0.998197	Cx3cr1WT-Cx3cr1KO	chr17	34038708	34039020	+	1000	promoter-TSS (NM_001317722)	promoter-TSS (NM_001317722)	-274	NM_009926	12815	Mm.20230	NM_009926	ENSMUSG00000024330	Col11a2	-	collagen, type XI, alpha 2	protein-coding
103.416	-0.0914756	0.329808	-0.27736	0.781504	0.986928	Cx3cr1WT-Cx3cr1KO	chr4	139574121	139574328	+	1000	promoter-TSS (NM_001205173)	promoter-TSS (NM_001205173)	-496	NM_001205173	212632	Mm.30464	NM_183148	ENSMUSG00000041025	Iffo2	C79267	intermediate filament family orphan 2	protein-coding
54.1716	-0.000438085	0.357771	-0.00122449	0.999023	0.999755	Cx3cr1WT-Cx3cr1KO	chr4	58912628	58912845	+	1000	promoter-TSS (NM_172381)	promoter-TSS (NM_172381)	13	NM_172381	230249	Mm.234801	NM_172381	ENSMUSG00000050812	AI314180	AW558785|BB181316|Ecpas|mKIAA0368	expressed sequence AI314180	protein-coding
115.099	-0.183862	0.330908	-0.555628	0.578465	0.955217	Cx3cr1WT-Cx3cr1KO	chr7	5061650	5061860	+	1000	promoter-TSS (NM_133671)	promoter-TSS (NM_133671)	-388	NM_133671	22185	Mm.360389	NM_133671	ENSMUSG00000030435	U2af2	65kDa	U2 small nuclear ribonucleoprotein auxiliary factor (U2AF) 2	protein-coding
117.079	-0.265192	0.334087	-0.793781	0.427323	0.920023	Cx3cr1WT-Cx3cr1KO	chr7	89404285	89404526	+	1000	promoter-TSS (NM_008055)	promoter-TSS (NM_008055)	39	NM_008055	14366	Mm.86755	NM_008055	ENSMUSG00000049791	Fzd4	Fz4	frizzled class receptor 4	protein-coding
221.871	-0.352182	0.264054	-1.33375	0.182285	0.818828	Cx3cr1WT-Cx3cr1KO	chr10	80172955	80173160	+	1000	TTS (NR_152857)	TTS (NR_152857)	113	NM_027207	69770	Mm.302754	NM_027207	ENSMUSG00000035595	1600002K03Rik	-	RIKEN cDNA 1600002K03 gene	protein-coding
92.3421	-0.297742	0.345084	-0.86281	0.388242	0.914739	Cx3cr1WT-Cx3cr1KO	chr16	18413033	18413323	+	1000	intron (NM_007744, intron 1 of 4)	intron (NM_007744, intron 1 of 4)	316	NM_001111063	12846	Mm.100940	NM_007744	ENSMUSG00000000326	Comt	Comt1|D16Wsu103e|D330014B15Rik	catechol-O-methyltransferase	protein-coding
54.8249	0.517257	0.361183	1.43212	0.152111	0.784287	Cx3cr1WT-Cx3cr1KO	chr2	180171517	180171738	+	1000	promoter-TSS (NM_019822)	promoter-TSS (NM_019822)	39	NM_019822	56436	Mm.316654	NM_019822	ENSMUSG00000039041	Adrm1	1110063P18Rik|2510006J17Rik|AA408205|ARM-1|AU043535|Arm1|Gp110|Rpn13	adhesion regulating molecule 1	protein-coding
240.761	0.0466407	0.273377	0.170609	0.864531	0.993944	Cx3cr1WT-Cx3cr1KO	chr2	3475091	3475353	+	1000	promoter-TSS (NM_022724)	promoter-TSS (NM_022724)	-236	NR_027509	64707	Mm.23483	NM_022724	ENSMUSG00000026646	Suv39h2	4930507K23Rik|AA536750|D030054H19Rik|D2Ertd544e|KMT1B	suppressor of variegation 3-9 2	protein-coding
132.702	0.000294087	0.321299	0.000915304	0.99927	0.999755	Cx3cr1WT-Cx3cr1KO	chr11	6274701	6274974	+	1000	promoter-TSS (NM_134020)	promoter-TSS (NM_134020)	0	NM_134020	103694	Mm.254495	NM_134020	ENSMUSG00000004394	Tmed4	1110014L17Rik|AI326346	transmembrane p24 trafficking protein 4	protein-coding
48.1436	0.00951755	0.361698	0.0263135	0.979007	0.998197	Cx3cr1WT-Cx3cr1KO	chr10	17947993	17948202	+	1000	promoter-TSS (NM_001033432)	promoter-TSS (NM_001033432)	-30	NM_001033432	380629	Mm.276430	NM_001033432	ENSMUSG00000039879	Heca	Gm869|HDC|HDCL	hdc homolog, cell cycle regulator	protein-coding
95.39	-0.121269	0.354383	-0.342197	0.732203	0.98239	Cx3cr1WT-Cx3cr1KO	chr6	34780758	34781032	+	1000	5' UTR (NM_001289657, exon 1 of 19)	5' UTR (NM_001289657, exon 1 of 19)	463	NM_001289656	76223	Mm.150047	NM_178630	ENSMUSG00000038836	Agbl3	2900053G10Rik|4930431N21Rik|6530406M24Rik|CCP3	ATP/GTP binding protein-like 3	protein-coding
472.089	0.0182462	0.209949	0.0869078	0.930745	0.995205	Cx3cr1WT-Cx3cr1KO	chr1	86359193	86359446	+	1000	promoter-TSS (NR_015507)	promoter-TSS (NR_015507)	136	NM_010880	17975	Mm.154378	NM_010880	ENSMUSG00000026234	Ncl	B530004O11Rik|C23|D0Nds28|D1Nds28|Nucl	nucleolin	protein-coding
89.6582	0.0505378	0.335789	0.150504	0.880367	0.993944	Cx3cr1WT-Cx3cr1KO	chr7	25076774	25077046	+	1000	5' UTR (NM_001168506, exon 2 of 3)	5' UTR (NM_001168506, exon 2 of 3)	103	NM_175477	232976	Mm.41568	NM_175477	ENSMUSG00000045252	Zfp574	A630056B21Rik|Znf574	zinc finger protein 574	protein-coding
25.6604	-0.889913	0.354971	-2.507	0.0121761	NA	Cx3cr1WT-Cx3cr1KO	chr15	76948390	76948630	+	1000	5' UTR (NM_054099, exon 1 of 4)	5' UTR (NM_054099, exon 1 of 4)	249	NM_001347540	117171	Mm.322968	NM_054099	ENSMUSG00000063236	1110038F14Rik	-	RIKEN cDNA 1110038F14 gene	protein-coding
163.008	0.554452	0.320083	1.73221	0.0832359	0.655764	Cx3cr1WT-Cx3cr1KO	chr4	155563739	155563966	+	1000	promoter-TSS (NM_001159637)	promoter-TSS (NM_001159637)	37	NM_001355599	192185	Mm.28347	NM_138671	ENSMUSG00000029063	Nadk	4432404C02Rik|BC004012	NAD kinase	protein-coding
37.9596	-0.301041	0.363543	-0.828077	0.407627	NA	Cx3cr1WT-Cx3cr1KO	chr12	3891915	3892154	+	1000	intron (NM_153743, intron 1 of 17)	intron (NM_153743, intron 1 of 17)	290	NM_153743	13435	Mm.5001	NM_007872	ENSMUSG00000020661	Dnmt3a	MmuIIIA	DNA methyltransferase 3A	protein-coding
179.017	-0.119014	0.280283	-0.42462	0.671114	0.9758	Cx3cr1WT-Cx3cr1KO	chr14	103069990	103070206	+	1000	promoter-TSS (NM_001033242)	promoter-TSS (NM_001033242)	-118	NM_001033242	211286	Mm.295289	NM_001033242	ENSMUSG00000022125	Cln5	A730075N08Rik	ceroid-lipofuscinosis, neuronal 5	protein-coding
167.163	-0.00936733	0.292876	-0.031984	0.974485	0.998197	Cx3cr1WT-Cx3cr1KO	chr9	55208873	55209132	+	1000	promoter-TSS (NM_028049)	promoter-TSS (NM_028049)	67	NM_028049	71999	Mm.276429	NM_028049	ENSMUSG00000032309	Fbxo22	0610033L19Rik|1600016C16Rik	F-box protein 22	protein-coding
243.027	-0.110345	0.269797	-0.408992	0.682545	0.97666	Cx3cr1WT-Cx3cr1KO	chr18	35739888	35740175	+	1000	intron (NM_028261, intron 1 of 7)	intron (NM_028261, intron 1 of 7)	523	NM_028261	72512	Mm.45995	NM_028261	ENSMUSG00000024349	Tmem173	2610307O08Rik|ERIS|MPYS|Mita|STING	transmembrane protein 173	protein-coding
115.365	0.143117	0.338195	0.423178	0.672165	0.9758	Cx3cr1WT-Cx3cr1KO	chrX	36328319	36328548	+	1000	promoter-TSS (NM_028894)	promoter-TSS (NM_028894)	24	NM_028894	74365	Mm.327654	NM_028894	ENSMUSG00000016239	Lonrf3	4932412G04Rik|5730439E01Rik|A830039N02Rik|AU023707|Rnf127	LON peptidase N-terminal domain and ring finger 3	protein-coding
149.318	-0.500237	0.294665	-1.69764	0.0895752	0.674023	Cx3cr1WT-Cx3cr1KO	chr19	44931099	44931302	+	1000	promoter-TSS (NM_001081225)	promoter-TSS (NM_001081225)	81	NM_001081225	226151	Mm.212609	NM_172638	ENSMUSG00000036097	Slf2	3632432H19|Fam178a	SMC5-SMC6 complex localization factor 2	protein-coding
104.565	-0.297005	0.327975	-0.905569	0.365164	0.906744	Cx3cr1WT-Cx3cr1KO	chr6	149188554	149188751	+	1000	promoter-TSS (NM_001113424)	promoter-TSS (NM_001113424)	60	NM_001356344	232566	Mm.209147	NM_001113424	ENSMUSG00000068250	Amn1	5830467E07Rik|A230083D09|C730024G19Rik	antagonist of mitotic exit network 1	protein-coding
96.9838	0.686948	0.334716	2.05233	0.0401375	0.536174	Cx3cr1WT-Cx3cr1KO	chr11	103953808	103954036	+	1000	intron (NM_008740, intron 1 of 20)	intron (NM_008740, intron 1 of 20)	134	NM_008740	18195	Mm.260117	NM_008740	ENSMUSG00000034187	Nsf	AI316878|AU020090|AU067812|SKD2	N-ethylmaleimide sensitive fusion protein	protein-coding
677.791	-0.0965732	0.175716	-0.549598	0.582595	0.956591	Cx3cr1WT-Cx3cr1KO	chr11	115514238	115514452	+	1000	promoter-TSS (NM_008258)	promoter-TSS (NM_008258)	48	NM_008258	15374	Mm.1775	NM_008258	ENSMUSG00000020737	Jpt1	Hn1	Jupiter microtubule associated homolog 1	protein-coding
336.259	-0.0758732	0.229843	-0.330109	0.741318	0.98239	Cx3cr1WT-Cx3cr1KO	chr8	122567469	122567904	+	1000	promoter-TSS (NM_026014)	promoter-TSS (NM_026014)	-329	NM_026014	67177	Mm.21873	NM_026014	ENSMUSG00000006585	Cdt1	2610318F11Rik|AW545653|C76791|Ris2	chromatin licensing and DNA replication factor 1	protein-coding
140.154	-0.0401704	0.31625	-0.127021	0.898924	0.993944	Cx3cr1WT-Cx3cr1KO	chr3	103791324	103791523	+	1000	promoter-TSS (NM_001301306)	promoter-TSS (NM_001301306)	138	NR_125731	15257	Mm.20827	NM_010432	ENSMUSG00000008730	Hipk1	1110062K04Rik|Myak	homeodomain interacting protein kinase 1	protein-coding
68.0972	0.809904	0.349861	2.31493	0.0206168	0.447538	Cx3cr1WT-Cx3cr1KO	chr15	102295950	102296195	+	1000	promoter-TSS (NM_001014976)	promoter-TSS (NM_001014976)	-221	NM_001014976	105988	Mm.288324	NM_001014976	ENSMUSG00000058290	Espl1	AL024103|AU045071|Cerp|ESP1|PRCE|SSE	extra spindle pole bodies 1, separase	protein-coding
350.281	0.227976	0.217019	1.05049	0.293495	0.88813	Cx3cr1WT-Cx3cr1KO	chr11	107470556	107470786	+	1000	promoter-TSS (NM_145823)	promoter-TSS (NM_145823)	49	NR_153311	71795	Mm.397413	NM_145823	ENSMUSG00000040430	Pitpnc1	1110020B03Rik|5830436L09Rik|AI662802|AI851387|C330017I21Rik|Dnr411|RDGBB|RDGBB1|mrdgBbeta|rdgB-beta	phosphatidylinositol transfer protein, cytoplasmic 1	protein-coding
99.1457	-0.0490192	0.327097	-0.149861	0.880874	0.993944	Cx3cr1WT-Cx3cr1KO	chr8	35495379	35495607	+	1000	promoter-TSS (NM_026067)	promoter-TSS (NM_026067)	40	NM_026067	67276	Mm.207534	NM_026067	ENSMUSG00000031527	Eri1	3'hexo|3110010F15Rik|Thex1|eri-1	exoribonuclease 1	protein-coding
44.6756	0.254616	0.363126	0.701177	0.483193	NA	Cx3cr1WT-Cx3cr1KO	chr7	142533066	142533299	+	1000	promoter-TSS (NM_011288)	promoter-TSS (NM_011288)	65	NM_011288	19935	Mm.12144	NM_011288	ENSMUSG00000037772	Mrpl23	L23mrp|Rpl23|Rpl23l	mitochondrial ribosomal protein L23	protein-coding
73.7714	-0.452142	0.361843	-1.24956	0.211462	0.84677	Cx3cr1WT-Cx3cr1KO	chr7	101108718	101108977	+	1000	promoter-TSS (NM_001146010)	promoter-TSS (NM_001146010)	72	NM_199012	207278	Mm.263041	NM_199012	ENSMUSG00000030691	Fchsd2	BC034086|R74866|Sh3md3|mKIAA0769	FCH and double SH3 domains 2	protein-coding
160.645	-0.114482	0.289631	-0.395267	0.692646	0.977603	Cx3cr1WT-Cx3cr1KO	chr7	127511960	127512224	+	1000	non-coding (NR_024331, exon 1 of 1)	non-coding (NR_024331, exon 1 of 1)	109	NM_001304266	100043597	Mm.428042	NM_175144	ENSMUSG00000053877	Srcap	B930091H02Rik|D030022P06Rik|F630004O05Rik	Snf2-related CREBBP activator protein	protein-coding
230.899	-0.154467	0.275517	-0.560644	0.57504	0.955217	Cx3cr1WT-Cx3cr1KO	chr16	15863155	15863403	+	1000	promoter-TSS (NM_029354)	promoter-TSS (NM_029354)	90	NM_029354	72083	Mm.22351	NM_029354	ENSMUSG00000022671	Mzt2	2410018G20Rik|2610001E06Rik|Fam128|Fam128b	mitotic spindle organizing protein 2	protein-coding
66.1825	0.217015	0.35651	0.608721	0.54271	0.949448	Cx3cr1WT-Cx3cr1KO	chr14	47649071	47649313	+	1000	promoter-TSS (NM_001347524)	promoter-TSS (NM_001347524)	-119	NM_001347527	16709	Mm.3110	NM_008477	ENSMUSG00000021843	Ktn1	-	kinectin 1	protein-coding
349.061	0.204166	0.221637	0.921173	0.35696	0.905277	Cx3cr1WT-Cx3cr1KO	chr9	44334618	44334853	+	1000	promoter-TSS (NM_010436)	promoter-TSS (NM_010436)	20	NM_010436	15270	Mm.245931	NM_010436	ENSMUSG00000049932	H2afx	AW228881|H2A.X|H2ax|Hist5-2ax|gammaH2ax	H2A histone family, member X	protein-coding
44.4521	-0.499973	0.363075	-1.37705	0.168496	NA	Cx3cr1WT-Cx3cr1KO	chr1	23383438	23383645	+	1000	promoter-TSS (NM_001081079)	promoter-TSS (NM_001081079)	-366	NM_001081079	70155	Mm.28013	NM_001081079	ENSMUSG00000026158	Ogfrl1	2210417C17Rik	opioid growth factor receptor-like 1	protein-coding
115.285	0.429097	0.321368	1.33522	0.181804	0.818828	Cx3cr1WT-Cx3cr1KO	chr4	86612153	86612383	+	1000	promoter-TSS (NM_173400)	promoter-TSS (NM_173400)	-213	NM_173400	230376	Mm.74730	NM_173400	ENSMUSG00000038047	Haus6	6230416J20Rik|9830144E06|D4Ertd27e|mKIAA1574	HAUS augmin-like complex, subunit 6	protein-coding
119.825	-0.167486	0.330445	-0.506851	0.61226	0.958833	Cx3cr1WT-Cx3cr1KO	chr9	78587882	78588236	+	1000	promoter-TSS (NM_001276452)	promoter-TSS (NM_001276452)	-14	NM_001276452	235504	Mm.46932	NM_172773	ENSMUSG00000049624	Slc17a5	4631416G20Rik|4732491M05|AST|ISSD|NSD|SD|SIALIN|SIASD|SLD	solute carrier family 17 (anion/sugar transporter), member 5	protein-coding
152.421	-0.264995	0.297889	-0.889575	0.373694	0.909815	Cx3cr1WT-Cx3cr1KO	chr4	126024505	126024853	+	1000	promoter-TSS (NR_045561)	promoter-TSS (NR_045561)	20	NM_001252651	12986	Mm.271701	NM_007782	ENSMUSG00000028859	Csf3r	Cd114|Csfgr|G-CSF-R|G-CSFR	colony stimulating factor 3 receptor (granulocyte)	protein-coding
73.2515	0.478602	0.346607	1.38082	0.167334	0.807197	Cx3cr1WT-Cx3cr1KO	chr2	5951407	5951643	+	1000	promoter-TSS (NM_001081132)	promoter-TSS (NM_001081132)	56	NM_001081132	326622	Mm.31102	NM_001081132	ENSMUSG00000043241	Upf2	-	UPF2 regulator of nonsense transcripts homolog (yeast)	protein-coding
80.0109	-0.391595	0.344725	-1.13596	0.255971	0.862	Cx3cr1WT-Cx3cr1KO	chr15	39944105	39944321	+	1000	promoter-TSS (NM_172814)	promoter-TSS (NM_172814)	-219	NM_172814	239393	Mm.39874	NM_172814	ENSMUSG00000022305	Lrp12	AI848829|C820005L12Rik|LRP-12	low density lipoprotein-related protein 12	protein-coding
137.149	0.235967	0.303353	0.777862	0.43665	0.925546	Cx3cr1WT-Cx3cr1KO	chr4	6453499	6453790	+	1000	intron (NM_010945, intron 1 of 30)	CpG	627	NM_010945	18201	Mm.3059	NM_010945	ENSMUSG00000028245	Nsmaf	AA959567|C630007J05|Fan	neutral sphingomyelinase (N-SMase) activation associated factor	protein-coding
386.164	-0.174608	0.213493	-0.81786	0.413437	0.91588	Cx3cr1WT-Cx3cr1KO	chr7	29983889	29984094	+	1000	promoter-TSS (NM_001167873)	promoter-TSS (NM_001167873)	36	NM_001167872	243905	Mm.322432	NM_001033355	ENSMUSG00000074221	Zfp568	C80731|Gm1691|Znf568|chato	zinc finger protein 568	protein-coding
54.2016	0.254671	0.359599	0.708207	0.478817	0.931076	Cx3cr1WT-Cx3cr1KO	chr13	54468694	54468984	+	1000	promoter-TSS (NM_028597)	promoter-TSS (NM_028597)	1	NM_028597	73666	Mm.292487	NM_028597	ENSMUSG00000025872	Thoc3	2410044K02Rik|AL033344	THO complex 3	protein-coding
70.8515	-0.0440776	0.35378	-0.124591	0.900848	0.993944	Cx3cr1WT-Cx3cr1KO	chr10	100487152	100487377	+	1000	promoter-TSS (NM_001110013)	promoter-TSS (NM_001110013)	83	NM_001033332	237500	Mm.296805	NM_001033332	ENSMUSG00000036676	Tmtc3	9130014E20Rik|B130008E12Rik|mSmile	transmembrane and tetratricopeptide repeat containing 3	protein-coding
111.38	0.395486	0.317028	1.24748	0.212221	0.846898	Cx3cr1WT-Cx3cr1KO	chr18	34506784	34507100	+	1000	promoter-TSS (NM_146084)	promoter-TSS (NM_146084)	-119	NM_146084	225358	Mm.226899	NM_146084	ENSMUSG00000036501	Fam13b	2610024E20Rik|AW060714|AW546153	family with sequence similarity 13, member B	protein-coding
98.4529	0.15532	0.330116	0.4705	0.637998	0.967009	Cx3cr1WT-Cx3cr1KO	chr5	110230920	110231189	+	1000	promoter-TSS (NM_001253814)	promoter-TSS (NM_001253814)	50	NM_027922	71782	Mm.288442	NM_027922	ENSMUSG00000029501	Ankle2	1110001J12Rik|AI661024|D5Ertd585e	ankyrin repeat and LEM domain containing 2	protein-coding
123.392	-0.705185	0.325103	-2.16911	0.0300744	0.490905	Cx3cr1WT-Cx3cr1KO	chr3	9004571	9004775	+	1000	promoter-TSS (NM_001357072)	promoter-TSS (NM_001357072)	50	NM_009412	21985	Mm.371590	NM_009412	ENSMUSG00000027506	Tpd52	AI043038|mD52	tumor protein D52	protein-coding
43.07	-0.0069149	0.363603	-0.0190177	0.984827	NA	Cx3cr1WT-Cx3cr1KO	chr17	33920230	33920445	+	1000	exon (NM_009318, exon 3 of 8)	exon (NM_009318, exon 3 of 8)	859	NM_009318	21356	Mm.154457	NM_009318	ENSMUSG00000024308	Tapbp	D17Wsu91e|TPN	TAP binding protein	protein-coding
59.2645	-0.415221	0.358457	-1.15836	0.246718	0.860364	Cx3cr1WT-Cx3cr1KO	chr10	21993054	21993297	+	1000	promoter-TSS (NM_001161850)	promoter-TSS (NM_001161850)	-715	NM_001161850	20393	Mm.28405	NM_011361	ENSMUSG00000019970	Sgk1	Sgk	serum/glucocorticoid regulated kinase 1	protein-coding
166.324	0.901989	0.288027	3.13162	0.00173847	0.188758	Cx3cr1WT-Cx3cr1KO	chr15	57892235	57892483	+	1000	promoter-TSS (NM_024207)	promoter-TSS (NM_024207)	59	NM_024207	67819	Mm.289387	NM_024207	ENSMUSG00000022365	Derl1	1110021N07Rik|AI195141|AW551338|Derlin-1	Der1-like domain family, member 1	protein-coding
173.459	0.303739	0.293526	1.03479	0.300766	0.892713	Cx3cr1WT-Cx3cr1KO	chr8	125053868	125054176	+	1000	promoter-TSS (NM_174853)	promoter-TSS (NM_174853)	-173	NM_174853	244667	Mm.233504	NM_170596	ENSMUSG00000043051	Disc1	-	disrupted in schizophrenia 1	protein-coding
96.3412	-0.396503	0.362238	-1.09459	0.273695	0.87665	Cx3cr1WT-Cx3cr1KO	chr17	83351676	83351897	+	1000	intron (NM_001357886, intron 1 of 21)	intron (NM_001357886, intron 1 of 21)	855	NM_001357886	78798	Mm.295565	NM_199466	ENSMUSG00000032624	Eml4	4930443C24Rik|AI644019	echinoderm microtubule associated protein like 4	protein-coding
136.801	0.163752	0.302577	0.541193	0.588375	0.957758	Cx3cr1WT-Cx3cr1KO	chr14	24490647	24490878	+	1000	promoter-TSS (NM_207635)	promoter-TSS (NM_207635)	9	NM_001360586	20088	Mm.16775	NM_011297	ENSMUSG00000025290	Rps24	-	ribosomal protein S24	protein-coding
49.7551	0.00144189	0.3636	0.00396559	0.996836	0.999755	Cx3cr1WT-Cx3cr1KO	chr10	80020254	80020498	+	1000	intron (NM_027521, intron 1 of 21)	intron (NM_027521, intron 1 of 21)	701	NM_027521	70719	Mm.243954	NM_027521	ENSMUSG00000035697	Arhgap45	6330406L22Rik|AW539505|Ha-1|Hmha1	Rho GTPase activating protein 45	protein-coding
240.474	0.671826	0.278774	2.40994	0.0159553	0.408237	Cx3cr1WT-Cx3cr1KO	chr13	47043487	47043704	+	1000	promoter-TSS (NM_172262)	promoter-TSS (NM_172262)	96	NM_172262	218214	Mm.31259	NM_172262	ENSMUSG00000038080	Kdm1b	4632428N09Rik|AI482520|Aof1	lysine (K)-specific demethylase 1B	protein-coding
98.7284	0.0788677	0.34634	0.227718	0.819866	0.990013	Cx3cr1WT-Cx3cr1KO	chr1	161131319	161131519	+	1000	promoter-TSS (NM_001039482)	promoter-TSS (NM_001039482)	60	NM_001039482	226541	Mm.255165	NM_144876	ENSMUSG00000026705	Klhl20	AI504637|D930050H05Rik|Kleip|mKIAA4210	kelch-like 20	protein-coding
88.281	0.308924	0.333548	0.926177	0.354354	0.902814	Cx3cr1WT-Cx3cr1KO	chr11	78328403	78328624	+	1000	promoter-TSS (NM_201406)	promoter-TSS (NM_201406)	91	NM_201406	276846	Mm.295908	NM_201406	ENSMUSG00000041958	Pigs	BC058979|Gm393|Gm689	phosphatidylinositol glycan anchor biosynthesis, class S	protein-coding
59.4909	-0.917645	0.360461	-2.54576	0.0109042	0.35887	Cx3cr1WT-Cx3cr1KO	chr2	150666800	150667183	+	1000	promoter-TSS (NR_040331)	promoter-TSS (NR_040331)	-503	NR_040331	109344	Mm.440012	NR_040331	ENSMUSG00000087406	E130215H24Rik	-	RIKEN cDNA E130215H24 gene	ncRNA
28.5662	1.26577	0.358339	3.53232	0.000411925	NA	Cx3cr1WT-Cx3cr1KO	chr9	86467162	86467365	+	1000	5' UTR (NM_177208, exon 1 of 39)	5' UTR (NM_177208, exon 1 of 39)	109	NM_177208	320615	Mm.245500	NM_177208	ENSMUSG00000034973	Dopey1	B130005I07Rik|BC035275|C130028L17|D9Ertd809e	dopey family member 1	protein-coding
154.64	0.0729654	0.295682	0.24677	0.805086	0.98788	Cx3cr1WT-Cx3cr1KO	chr11	74926055	74926321	+	1000	promoter-TSS (NM_013761)	promoter-TSS (NM_013761)	316	NM_001002764	103677	Mm.288460	NM_001002764	ENSMUSG00000038290	Smg6	AI317223|AU041178	Smg-6 homolog, nonsense mediated mRNA decay factor (C. elegans)	protein-coding
95.2339	0.797595	0.338472	2.35646	0.01845	0.430522	Cx3cr1WT-Cx3cr1KO	chr13	5862354	5862557	+	1000	intron (NM_011803, intron 1 of 3)	intron (NM_011803, intron 1 of 3)	966	NM_011803	23849	Mm.275036	NM_011803	ENSMUSG00000000078	Klf6	AI448727|BCD1|C86813|CPBP|Copeb|FM2|FM6|Ierepo1|Ierepo3|R75280|Zf9	Kruppel-like factor 6	protein-coding
63.4454	-0.613794	0.359611	-1.70683	0.0878539	0.67078	Cx3cr1WT-Cx3cr1KO	chr10	79926977	79927194	+	1000	promoter-TSS (NM_007880)	promoter-TSS (NM_007880)	42	NM_007880	13496	Mm.301282	NM_007880	ENSMUSG00000019564	Arid3a	Bright|Dri1|Dril1	AT rich interactive domain 3A (BRIGHT-like)	protein-coding
232.991	-0.112301	0.266222	-0.42183	0.673149	0.9758	Cx3cr1WT-Cx3cr1KO	chr3	103058274	103058480	+	1000	promoter-TSS (NM_010937)	promoter-TSS (NM_010937)	92	NM_010937	18176	Mm.400954	NM_010937	ENSMUSG00000027852	Nras	AV095280|N-ras	neuroblastoma ras oncogene	protein-coding
88.5926	0.110482	0.354021	0.312077	0.754982	0.983463	Cx3cr1WT-Cx3cr1KO	chr4	148444545	148444849	+	1000	promoter-TSS (NM_027873)	promoter-TSS (NM_027873)	54	NM_027873	71707	Mm.292503	NM_027873	ENSMUSG00000047719	Ubiad1	1200002M06Rik|AI426463|AW320947|Tere1	UbiA prenyltransferase domain containing 1	protein-coding
123.125	-0.0956072	0.317063	-0.30154	0.763003	0.983463	Cx3cr1WT-Cx3cr1KO	chr13	8996117	8996322	+	1000	promoter-TSS (NM_027000)	promoter-TSS (NM_027000)	-207	NM_027000	69237	Mm.41800	NM_027000	ENSMUSG00000021149	Gtpbp4	2610028C09Rik|Crfg|Gtpbp3|NGB|Nog1	GTP binding protein 4	protein-coding
226.927	-0.499643	0.280917	-1.77861	0.0753032	0.642598	Cx3cr1WT-Cx3cr1KO	chr2	164911832	164912068	+	1000	promoter-TSS (NM_199027)	promoter-TSS (NM_199027)	-200	NM_199027	329559	Mm.330776	NM_199027	ENSMUSG00000039834	Zfp335	1810045J01Rik|NIF-1|Nif1|Znf335	zinc finger protein 335	protein-coding
35.5801	-0.843304	0.362642	-2.32545	0.0200481	NA	Cx3cr1WT-Cx3cr1KO	chr11	93886084	93886298	+	1000	promoter-TSS (NM_134012)	promoter-TSS (NM_134012)	-16	NM_001346525	103537	Mm.210334	NM_134012	ENSMUSG00000059474	Mbtd1	AA408199|AI194990|hemp	mbt domain containing 1	protein-coding
66.6348	0.0808546	0.353315	0.228845	0.818989	0.990013	Cx3cr1WT-Cx3cr1KO	chr19	4154498	4154828	+	1000	promoter-TSS (NM_016933)	promoter-TSS (NM_016933)	17	NM_016933	19265	Mm.271937	NM_016933	ENSMUSG00000045826	Ptprcap	AI605264|CD-45-AP|LPAP|LSM-1	protein tyrosine phosphatase, receptor type, C polypeptide-associated protein	protein-coding
193.094	0.234744	0.276333	0.849498	0.395604	0.914739	Cx3cr1WT-Cx3cr1KO	chr11	100472616	100472831	+	1000	promoter-TSS (NM_172565)	promoter-TSS (NM_172565)	59	NR_155072	217194	Mm.183320	NM_172565	ENSMUSG00000048732	Klhl11	BC011167	kelch-like 11	protein-coding
214.284	0.0165814	0.300134	0.0552466	0.955942	0.998197	Cx3cr1WT-Cx3cr1KO	chr15	25413520	25413784	+	1000	promoter-TSS (NR_027376)	promoter-TSS (NR_027376)	112	NM_027395	70350	Mm.29586	NM_027395	ENSMUSG00000045763	Basp1	2610024P12Rik|CAP-23|CAP23|Ckap3|NAP-22|NAP22	brain abundant, membrane attached signal protein 1	protein-coding
253.527	-0.155979	0.274717	-0.567782	0.570183	0.953728	Cx3cr1WT-Cx3cr1KO	chr5	100429612	100429885	+	1000	promoter-TSS (NR_034038)	promoter-TSS (NR_034038)	-213	NR_034038	100503199	Mm.392282	NR_034038	ENSMUSG00000097772	5430416N02Rik	100041797|Adapt33|Gm3514	RIKEN cDNA 5430416N02 gene	ncRNA
24.8269	-0.475641	0.355219	-1.33901	0.180568	NA	Cx3cr1WT-Cx3cr1KO	chr4	155892266	155892472	+	1000	promoter-TSS (NM_001033490)	promoter-TSS (NM_001033490)	494	NM_207223	140500	Mm.219591	NM_207223	ENSMUSG00000029033	Acap3	Centb5|Kiaa1716-hp|mKIAA1716	ArfGAP with coiled-coil, ankyrin repeat and PH domains 3	protein-coding
971.138	-0.106545	0.14311	-0.744494	0.456577	0.931076	Cx3cr1WT-Cx3cr1KO	chr18	62179842	62180047	+	1000	promoter-TSS (NM_007420)	promoter-TSS (NM_007420)	37	NM_007420	11555	Mm.5598	NM_007420	ENSMUSG00000045730	Adrb2	Adrb-2|Badm|Gpcr7	adrenergic receptor, beta 2	protein-coding
387.902	-0.0607325	0.212117	-0.286316	0.774636	0.984991	Cx3cr1WT-Cx3cr1KO	chr7	4063004	4063260	+	1000	promoter-TSS (NM_001113474)	promoter-TSS (NM_001113474)	72	NM_001302677	52855	Mm.290880	NM_178611	ENSMUSG00000055541	Lair1	5133400O11Rik|BB115266|D7Bwg0421e|Lair-1	leukocyte-associated Ig-like receptor 1	protein-coding
600.905	0.0721538	0.183048	0.39418	0.693448	0.977603	Cx3cr1WT-Cx3cr1KO	chr11	95842029	95842413	+	1000	promoter-TSS (NM_001284393)	promoter-TSS (NM_001284393)	-74	NM_023121	14710	Mm.46299	NM_023121	ENSMUSG00000038811	Gngt2	AV096488	guanine nucleotide binding protein (G protein), gamma transducing activity polypeptide 2	protein-coding
628.5	0.518381	0.184887	2.80377	0.00505094	0.265551	Cx3cr1WT-Cx3cr1KO	chr17	87282633	87283017	+	1000	promoter-TSS (NR_015506)	promoter-TSS (NR_015506)	-11	NR_015506	74597	Mm.63783	NR_015506	ENSMUSG00000085287	4833418N02Rik	-	RIKEN cDNA 4833418N02 gene	ncRNA
102.161	0.0530569	0.32554	0.162981	0.870533	0.993944	Cx3cr1WT-Cx3cr1KO	chr2	128817462	128817820	+	1000	promoter-TSS (NM_028248)	promoter-TSS (NM_028248)	-662	NM_001355628	72477	Mm.259688	NM_028248	ENSMUSG00000014353	Tmem87b	2610301K12Rik|2810431I02Rik|AU014804	transmembrane protein 87B	protein-coding
32.6869	-0.179935	0.361639	-0.497553	0.618799	NA	Cx3cr1WT-Cx3cr1KO	chr4	114986625	114986869	+	1000	intron (NM_025647, intron 1 of 5)	CpG	481	NM_025647	66588	Mm.294159	NM_025647	ENSMUSG00000028719	Cmpk1	0610011D08Rik|CK|Cmpk|UMP-CMPk	cytidine monophosphate (UMP-CMP) kinase 1	protein-coding
170.841	-0.389665	0.287413	-1.35577	0.175173	0.814491	Cx3cr1WT-Cx3cr1KO	chr11	69900843	69901114	+	1000	promoter-TSS (NM_001316696)	promoter-TSS (NM_001316696)	8	NM_001316696	70419	Mm.272859	NM_027419	ENSMUSG00000018570	2810408A11Rik	1700019L01Rik|4930470J18Rik	RIKEN cDNA 2810408A11 gene	protein-coding
131.181	-0.195898	0.307172	-0.637747	0.523638	0.946726	Cx3cr1WT-Cx3cr1KO	chr11	70451855	70452117	+	1000	promoter-TSS (NM_025397)	promoter-TSS (NM_025397)	55	NM_025397	66172	Mm.46424	NM_025397	ENSMUSG00000018923	Med11	1110030J09Rik|AI465144|AW545069	mediator complex subunit 11	protein-coding
157.931	-0.30823	0.289389	-1.06511	0.286828	0.885562	Cx3cr1WT-Cx3cr1KO	chr4	156109574	156109797	+	1000	promoter-TSS (NM_145557)	promoter-TSS (NM_145557)	-313	NM_145557	230996	Mm.318925	NM_145557	ENSMUSG00000059939	9430015G10Rik	-	RIKEN cDNA 9430015G10 gene	protein-coding
137.86	-0.293196	0.327866	-0.894254	0.371186	0.909567	Cx3cr1WT-Cx3cr1KO	chr7	80387240	80387444	+	1000	5' UTR (NM_010194, exon 2 of 19)	5' UTR (NM_010194, exon 2 of 19)	604	NM_010194	14159	Mm.48757	NM_010194	ENSMUSG00000053158	Fes	AI586313|BB137047|FPS|c-fes	feline sarcoma oncogene	protein-coding
198.719	0.565883	0.268	2.1115	0.034729	0.513318	Cx3cr1WT-Cx3cr1KO	chr3	87263475	87263807	+	1000	promoter-TSS (NM_030707)	promoter-TSS (NM_030707)	-117	NM_030707	80891	Mm.45173	NM_030707	ENSMUSG00000015852	Fcrls	2810439C17Rik|9330158F12|FcRH2sc|Fcrh2|IFGP2|IgSR|MMAN-g|Msr2|moFcRH2sc	Fc receptor-like S, scavenger receptor	protein-coding
60.6942	0.361249	0.355006	1.01759	0.308874	0.892713	Cx3cr1WT-Cx3cr1KO	chr11	103218212	103218514	+	1000	promoter-TSS (NM_177801)	promoter-TSS (NM_177801)	69	NM_177801	328019	Mm.189646	NM_177801	ENSMUSG00000044787	Spata32	4933400C05Rik|VAD1.2	spermatogenesis associated 32	protein-coding
298.712	0.0270573	0.233405	0.115924	0.907713	0.993944	Cx3cr1WT-Cx3cr1KO	chr7	102250206	102250556	+	1000	promoter-TSS (NM_019566)	promoter-TSS (NM_019566)	-263	NM_019566	56212	Mm.259795	NM_019566	ENSMUSG00000073982	Rhog	2810426G09Rik|Arhg|Sid10750	ras homolog family member G	protein-coding
94.9944	-0.158864	0.341053	-0.465804	0.641356	0.969614	Cx3cr1WT-Cx3cr1KO	chr16	35769378	35769584	+	1000	promoter-TSS (NM_175111)	promoter-TSS (NM_175111)	-125	NM_153550	224132	Mm.24094	NM_153550	ENSMUSG00000022848	Dirc2	RCC4	disrupted in renal carcinoma 2 (human)	protein-coding
60.9459	-0.138387	0.356964	-0.387678	0.698254	0.978679	Cx3cr1WT-Cx3cr1KO	chr6	97205435	97205634	+	1000	exon (NM_001301859, exon 1 of 15)	exon (NM_001301859, exon 1 of 15)	113	NM_001301857	22200	Mm.277626	NM_011666	ENSMUSG00000030061	Uba3	A830034N06Rik|AI256736|AI848246|AW546539|Ube1c	ubiquitin-like modifier activating enzyme 3	protein-coding
317.528	0.156335	0.262941	0.594564	0.552135	0.951345	Cx3cr1WT-Cx3cr1KO	chr16	97535984	97536232	+	1000	promoter-TSS (NR_003508)	promoter-TSS (NR_003508)	25	NM_013606	17858	Mm.14157	NM_013606	ENSMUSG00000023341	Mx2	AI528743|Mx-2	MX dynamin-like GTPase 2	protein-coding
71.0391	-0.283557	0.356702	-0.794941	0.426648	0.920023	Cx3cr1WT-Cx3cr1KO	chr4	147809459	147809865	+	1000	intron (NM_001127189, intron 1 of 5)	intron (NM_001127189, intron 1 of 5)	126	NM_001127189	100041677	Mm.327194	NM_001127189	ENSMUSG00000078495	Zfp984	Gm13157	zinc finger protein 984	protein-coding
117.405	0.140724	0.329962	0.426486	0.669754	0.9758	Cx3cr1WT-Cx3cr1KO	chr11	74830505	74830707	+	1000	promoter-TSS (NM_010813)	promoter-TSS (NM_010813)	-318	NM_010813	17428	Mm.3759	NM_010813	ENSMUSG00000000282	Mnt	Rox|bHLHd3	max binding protein	protein-coding
194.698	0.106158	0.286901	0.370016	0.71137	0.981042	Cx3cr1WT-Cx3cr1KO	chr12	100187599	100187839	+	1000	promoter-TSS (NR_045282)	promoter-TSS (NR_045282)	-249	NR_045282	100038378	Mm.387075	NR_045282	ENSMUSG00000072884	Gm10433	-	predicted gene 10433	ncRNA
71.6676	-0.617056	0.351031	-1.75784	0.0787752	0.655764	Cx3cr1WT-Cx3cr1KO	chr6	113604694	113604903	+	1000	promoter-TSS (NM_133937)	promoter-TSS (NM_133937)	26	NM_133937	101314	Mm.485793	NM_133937	ENSMUSG00000033940	Brk1	6720456B07Rik|AW011779	BRICK1, SCAR/WAVE actin-nucleating complex subunit	protein-coding
65.6309	-0.301496	0.35183	-0.856936	0.39148	0.914739	Cx3cr1WT-Cx3cr1KO	chr17	46546094	46546390	+	1000	TTS (NM_020493)	TTS (NM_020493)	146	NM_001081335	78309	Mm.329076	NM_001081335	ENSMUSG00000040327	Cul9	1810035I07Rik|Cul-9|Parc|mKIAA0708	cullin 9	protein-coding
129.906	-0.252258	0.311946	-0.80866	0.418711	0.918481	Cx3cr1WT-Cx3cr1KO	chr2	92375406	92375662	+	1000	5' UTR (NM_145122, exon 1 of 11)	5' UTR (NM_145122, exon 1 of 11)	295	NM_145122	18633	Mm.202782	NM_145122	ENSMUSG00000027222	Pex16	-	peroxisomal biogenesis factor 16	protein-coding
142.928	-0.115986	0.302557	-0.383352	0.701459	0.978679	Cx3cr1WT-Cx3cr1KO	chr6	124711916	124712142	+	1000	promoter-TSS (NM_007531)	promoter-TSS (NM_007531)	149	NM_013536	14791	Mm.6390	NM_013536	ENSMUSG00000004268	Emg1	C2f|Grcc2f	EMG1 N1-specific pseudouridine methyltransferase	protein-coding
102.998	-0.382666	0.325134	-1.17695	0.239216	0.859725	Cx3cr1WT-Cx3cr1KO	chr6	83914293	83914533	+	1000	promoter-TSS (NM_008717)	promoter-TSS (NM_008717)	60	NM_001355284	18139	Mm.132392	NM_008717	ENSMUSG00000030016	Zfp638	AI323587|Np220|Zfml|Znf638|mNP220	zinc finger protein 638	protein-coding
68.0357	0.162784	0.349957	0.465154	0.641821	0.969614	Cx3cr1WT-Cx3cr1KO	chr13	103774331	103774585	+	1000	exon (NM_001361085, exon 1 of 12)	exon (NM_001361085, exon 1 of 12)	150	NM_001361085	218543	Mm.458176	NM_172592	ENSMUSG00000032621	Srek1	8430401B01|AI450757|AI462342|SRrp508|SRrp86|Sfrs12|Srsf12	splicing regulatory glutamine/lysine-rich protein 1	protein-coding
80.7934	-0.469872	0.356399	-1.31839	0.187374	0.822001	Cx3cr1WT-Cx3cr1KO	chr15	103310420	103310697	+	1000	promoter-TSS (NM_030720)	promoter-TSS (NM_030720)	-120	NM_030720	80910	Mm.160369	NM_030720	ENSMUSG00000063234	Gpr84	EX33	G protein-coupled receptor 84	protein-coding
86.3857	0.152974	0.355381	0.430452	0.666867	0.974469	Cx3cr1WT-Cx3cr1KO	chr14	63178085	63178305	+	1000	promoter-TSS (NM_001360211)	promoter-TSS (NM_001360211)	-308	NM_001360211	14137	Mm.474432	NM_010191	ENSMUSG00000021273	Fdft1	SQS|SS	farnesyl diphosphate farnesyl transferase 1	protein-coding
394.221	-0.120369	0.210128	-0.572836	0.566756	0.953728	Cx3cr1WT-Cx3cr1KO	chr7	92875197	92875444	+	1000	promoter-TSS (NM_028243)	promoter-TSS (NM_028243)	67	NM_028243	72461	Mm.389969	NM_028243	ENSMUSG00000061119	Prcp	2510048K03Rik|2610104A14Rik|AI451719|HUMPCP|PCP	prolylcarboxypeptidase (angiotensinase C)	protein-coding
98.682	-0.37801	0.346503	-1.09093	0.275305	0.877127	Cx3cr1WT-Cx3cr1KO	chr10	80577130	80577353	+	1000	promoter-TSS (NM_078477)	promoter-TSS (NM_078477)	55	NM_078477	118445	Mm.41513	NM_078477	ENSMUSG00000035397	Klf16	AI843742|BTEB4|DRRF	Kruppel-like factor 16	protein-coding
38.0278	-0.388085	0.36139	-1.07387	0.282883	NA	Cx3cr1WT-Cx3cr1KO	chr1	71102289	71102567	+	1000	intron (NM_007525, intron 1 of 10)	CpG	544	NM_007525	12021	Mm.10764	NM_007525	ENSMUSG00000026196	Bard1	-	BRCA1 associated RING domain 1	protein-coding
319.406	0.048862	0.23276	0.209925	0.833727	0.991565	Cx3cr1WT-Cx3cr1KO	chr4	126256167	126256424	+	1000	promoter-TSS (NM_144941)	promoter-TSS (NM_144941)	24	NM_144941	245877	Mm.266716	NM_144941	ENSMUSG00000028849	Map7d1	AV028413|BC019977|Mtap7d1|Parcc1|Rprc1|mKIAA1187	MAP7 domain containing 1	protein-coding
26.3119	-0.844934	0.34077	-2.47948	0.0131573	NA	Cx3cr1WT-Cx3cr1KO	chr11	69622004	69622201	+	1000	promoter-TSS (NM_001356469)	promoter-TSS (NM_001356469)	50	NM_001356468	69215	Mm.340410	NM_026991	ENSMUSG00000069835	Sat2	2610016A03Rik|SSAT-2|SSAT2	spermidine/spermine N1-acetyl transferase 2	protein-coding
249.949	0.362589	0.246884	1.46866	0.141924	0.771795	Cx3cr1WT-Cx3cr1KO	chrX	163908698	163908938	+	1000	promoter-TSS (NM_026887)	promoter-TSS (NM_026887)	-199	NM_001290378	108012	Mm.426783	NM_026887	ENSMUSG00000031367	Ap1s2	1500012A13Rik|AI853648|EST1	adaptor-related protein complex 1, sigma 2 subunit	protein-coding
121.395	0.219669	0.321102	0.684111	0.493905	0.934892	Cx3cr1WT-Cx3cr1KO	chr10	94688420	94688665	+	1000	promoter-TSS (NR_015524)	promoter-TSS (NR_015524)	71	NR_015524	67723	Mm.116284	NR_015524		Cep83os	4932415G12Rik|Ccdc41os1	centrosomal protein 83, opposite strand	ncRNA
295.049	-0.0261752	0.235809	-0.111002	0.911615	0.993944	Cx3cr1WT-Cx3cr1KO	chr3	126596250	126596496	+	1000	promoter-TSS (NM_001293665)	promoter-TSS (NM_001293665)	-578	NM_001346636	108058	Mm.255822	NM_023813	ENSMUSG00000053819	Camk2d	2810011D23Rik|8030469K03Rik|CaMK II|[d]-CaMKII	calcium/calmodulin-dependent protein kinase II, delta	protein-coding
143.402	-0.355788	0.324453	-1.09658	0.272826	0.87665	Cx3cr1WT-Cx3cr1KO	chr4	138973353	138973658	+	1000	intron (NM_029857, intron 1 of 16)	intron (NM_029857, intron 1 of 16)	600	NM_029857	77056	Mm.122336	NM_029857	ENSMUSG00000041143	Tmco4	4632413C14Rik|AI430825	transmembrane and coiled-coil domains 4	protein-coding
41.6206	-0.202838	0.363405	-0.558158	0.576736	NA	Cx3cr1WT-Cx3cr1KO	chr11	3330627	3330917	+	1000	promoter-TSS (NM_178149)	promoter-TSS (NM_178149)	41	NM_178149	216505	Mm.390323	NM_178149	ENSMUSG00000034614	Pik3ip1	1500004A08Rik|5830455E04Rik|Crkd|Hgfl	phosphoinositide-3-kinase interacting protein 1	protein-coding
91.8872	-0.198528	0.344215	-0.576754	0.564106	0.953728	Cx3cr1WT-Cx3cr1KO	chr19	4283736	4283978	+	1000	promoter-TSS (NM_026720)	promoter-TSS (NM_026720)	-720	NM_026720	68423	Mm.23642	NM_026720	ENSMUSG00000005986	Ankrd13d	0710001P18Rik|AI430801	ankyrin repeat domain 13 family, member D	protein-coding
130.229	0.253176	0.305994	0.827391	0.408016	0.914739	Cx3cr1WT-Cx3cr1KO	chr15	77841388	77841697	+	1000	intron (NM_022410, intron 1 of 40)	CpG	633	NM_022410	17886	Mm.29677	NM_022410	ENSMUSG00000022443	Myh9	Fltn|Myhn-1|Myhn1|NMHCIIA|NMMHC-A|NMMHC-IIA|TU72.6	myosin, heavy polypeptide 9, non-muscle	protein-coding
44.8937	-0.355494	0.363544	-0.977856	0.328146	NA	Cx3cr1WT-Cx3cr1KO	chr19	14598523	14598720	+	1000	promoter-TSS (NM_001302950)	promoter-TSS (NM_001302950)	-438	NM_001302947	21888	Mm.103638	NM_011600	ENSMUSG00000024642	Tle4	5730411M05Rik|AA792082|Bce-1|Bce1|ESTM13|ESTM14|Grg4|X83332|X83333|grg-4	transducin-like enhancer of split 4	protein-coding
71.6119	0.946663	0.357055	2.65131	0.00801806	0.310158	Cx3cr1WT-Cx3cr1KO	chr16	57549096	57549329	+	1000	promoter-TSS (NM_001177871)	promoter-TSS (NM_001177871)	-30	NM_001177871	78749	Mm.328360	NM_001040397	ENSMUSG00000043336	Filip1l	4631422O05Rik|Doc1	filamin A interacting protein 1-like	protein-coding
68.9096	-0.119087	0.35755	-0.333064	0.739086	0.98239	Cx3cr1WT-Cx3cr1KO	chr5	105518990	105519253	+	1000	promoter-TSS (NM_133897)	promoter-TSS (NM_133897)	-350	NM_133897	100604	Mm.319847	NM_133897	ENSMUSG00000054720	Lrrc8c	AD158|AI326115|E430036I04Rik|fad158	leucine rich repeat containing 8 family, member C	protein-coding
72.9892	-0.390669	0.356892	-1.09464	0.273674	0.87665	Cx3cr1WT-Cx3cr1KO	chr5	130144807	130145022	+	1000	promoter-TSS (NM_172509)	promoter-TSS (NM_172509)	26	NM_172509	212919	Mm.55812	NM_172509	ENSMUSG00000034110	Kctd7	4932409E18|9430010P06Rik	potassium channel tetramerisation domain containing 7	protein-coding
118.807	0.526701	0.320416	1.64381	0.100216	0.702585	Cx3cr1WT-Cx3cr1KO	chr9	70503176	70503406	+	1000	promoter-TSS (NM_001357494)	promoter-TSS (NM_001357494)	87	NM_001357494	93836	Mm.29783	NM_033604	ENSMUSG00000032217	Rnf111	ARK|Arkadia	ring finger 111	protein-coding
124.068	-0.102507	0.339196	-0.302205	0.762496	0.983463	Cx3cr1WT-Cx3cr1KO	chr4	115838244	115838489	+	1000	promoter-TSS (NM_021461)	promoter-TSS (NM_021461)	-832	NM_001285488	17346	Mm.209327	NM_021461	ENSMUSG00000028708	Mknk1	2410048M24Rik|Mnk1	MAP kinase-interacting serine/threonine kinase 1	protein-coding
242.45	0.772217	0.307376	2.51229	0.0119952	0.373973	Cx3cr1WT-Cx3cr1KO	chr7	99980302	99980530	+	1000	promoter-TSS (NM_175388)	promoter-TSS (NM_175388)	42	NM_175388	108937	Mm.323087	NM_175388	ENSMUSG00000058761	Rnf169	2900057K09Rik	ring finger protein 169	protein-coding
138.799	-0.320839	0.311901	-1.02866	0.303641	0.892713	Cx3cr1WT-Cx3cr1KO	chr5	101765688	101765910	+	1000	intron (NM_173370, intron 1 of 12)	intron (NM_173370, intron 1 of 12)	669	NM_173370	74596	Mm.46764	NM_173370	ENSMUSG00000029330	Cds1	4833409J18Rik|AI314024|AW125888	CDP-diacylglycerol synthase 1	protein-coding
146.088	0.235813	0.298732	0.789379	0.42989	0.922874	Cx3cr1WT-Cx3cr1KO	chr11	6520729	6521052	+	1000	promoter-TSS (NM_178440)	promoter-TSS (NM_178440)	68	NM_178440	246177	Mm.239554	NM_178440	ENSMUSG00000020437	Myo1g	E430002D17Rik	myosin IG	protein-coding
75.004	0.296628	0.347157	0.854451	0.392855	0.914739	Cx3cr1WT-Cx3cr1KO	chr5	136567148	136567373	+	1000	5' UTR (NM_009986, exon 1 of 24)	5' UTR (NM_009986, exon 1 of 24)	230	NM_001291234	13047	Mm.320317	NM_009986	ENSMUSG00000029705	Cux1	CDP|Cutl1|Cux|Cux-1	cut-like homeobox 1	protein-coding
50.8261	0.274743	0.362597	0.75771	0.448625	0.928217	Cx3cr1WT-Cx3cr1KO	chr13	59584933	59585159	+	1000	promoter-TSS (NM_030153)	promoter-TSS (NM_030153)	177	NR_045633	319469	Mm.437992	NR_045633	ENSMUSG00000021557	A230056J06Rik	-	RIKEN cDNA A230056J06 gene	ncRNA
128.089	0.260971	0.315069	0.828296	0.407503	0.914739	Cx3cr1WT-Cx3cr1KO	chr19	4928332	4928571	+	1000	promoter-TSS (NM_133803)	promoter-TSS (NM_133803)	-164	NM_133803	75221	Mm.234769	NM_133803	ENSMUSG00000063904	Dpp3	4930533O14Rik|C86324|DPP III	dipeptidylpeptidase 3	protein-coding
77.1327	0.125867	0.361614	0.34807	0.727787	0.981655	Cx3cr1WT-Cx3cr1KO	chr17	6106300	6106635	+	1000	promoter-TSS (NM_001103181)	promoter-TSS (NM_001103181)	-363	NM_001103181	68842	Mm.449307	NM_054040	ENSMUSG00000034377	Tulp4	1110057P05Rik|2210038L17Rik|Tusp	tubby like protein 4	protein-coding
69.4384	-0.354799	0.352996	-1.00511	0.314844	0.895746	Cx3cr1WT-Cx3cr1KO	chr4	63362012	63362276	+	1000	promoter-TSS (NM_011016)	promoter-TSS (NM_011016)	-305	NM_011016	18406	Mm.14173	NM_011016	ENSMUSG00000061540	Orm2	Agp1|Orm-2	orosomucoid 2	protein-coding
71.3933	0.401918	0.349391	1.15034	0.250006	0.860364	Cx3cr1WT-Cx3cr1KO	chr15	79834079	79834306	+	1000	exon (NM_028763, exon 1 of 5)	exon (NM_028763, exon 1 of 5)	141	NM_001013360	504193	Mm.38438	NM_029079	ENSMUSG00000089837	Npcd	Cbx6-Nptxr	neuronal pentraxin chromo domain	protein-coding
67.5794	-0.043976	0.353243	-0.124492	0.900926	0.993944	Cx3cr1WT-Cx3cr1KO	chr6	13677843	13678076	+	1000	promoter-TSS (NM_175312)	promoter-TSS (NM_175312)	7	NM_175312	101148	Mm.354863	NM_175312	ENSMUSG00000042742	Bmt2	AI666701|B630005N14Rik	base methyltransferase of 25S rRNA 2	protein-coding
37.0349	0.0881998	0.363608	0.242568	0.80834	NA	Cx3cr1WT-Cx3cr1KO	chr15	80711852	80712069	+	1000	intron (NM_144812, intron 1 of 24)	CpG	647	NM_144812	213988	Mm.131328	NM_144812	ENSMUSG00000047888	Tnrc6b	2700090M07Rik|A730065C02Rik|AI848765|D230019K20Rik	trinucleotide repeat containing 6b	protein-coding
394.263	-0.173823	0.215676	-0.805944	0.420275	0.919373	Cx3cr1WT-Cx3cr1KO	chr2	73486282	73486501	+	1000	promoter-TSS (NM_001289723)	promoter-TSS (NM_001289723)	-638	NM_001289723	215280	Mm.223504	NM_153138	ENSMUSG00000075284	Wipf1	AI115543|D2Ertd120e|WIP|Waspip	WAS/WASL interacting protein family, member 1	protein-coding
308.466	-0.136826	0.246981	-0.553994	0.579583	0.955217	Cx3cr1WT-Cx3cr1KO	chr6	120916665	120916936	+	1000	promoter-TSS (NM_007544)	promoter-TSS (NM_007544)	24	NM_007544	12122	Mm.235081	NM_007544	ENSMUSG00000004446	Bid	2700049M22Rik|AI875481|AU022477	BH3 interacting domain death agonist	protein-coding
73.5486	0.691661	0.34936	1.9798	0.0477264	0.559945	Cx3cr1WT-Cx3cr1KO	chr9	101251231	101251546	+	1000	intron (NM_001161362, intron 1 of 13)	CpG	444	NM_001161362	235542	Mm.335386	NM_172144	ENSMUSG00000043154	Ppp2r3a	3222402P14Rik|A730042E07	protein phosphatase 2, regulatory subunit B'', alpha	protein-coding
65.9298	0.829359	0.35918	2.30903	0.0209417	0.448343	Cx3cr1WT-Cx3cr1KO	chr9	56994839	56995078	+	1000	promoter-TSS (NM_019651)	promoter-TSS (NM_019651)	-10	NM_019651	56294	Mm.325643	NM_019651	ENSMUSG00000032290	Ptpn9	MEG2	protein tyrosine phosphatase, non-receptor type 9	protein-coding
45.9418	0.199019	0.362086	0.549646	0.582562	NA	Cx3cr1WT-Cx3cr1KO	chr9	41004936	41005303	+	1000	promoter-TSS (NM_001281954)	promoter-TSS (NM_001281954)	-491	NM_001281954	54698	Mm.42791	NM_019465	ENSMUSG00000032021	Crtam	-	cytotoxic and regulatory T cell molecule	protein-coding
74.5882	-0.214653	0.346231	-0.619969	0.535278	0.947185	Cx3cr1WT-Cx3cr1KO	chr12	32953636	32953896	+	1000	promoter-TSS (NR_044986)	promoter-TSS (NR_044986)	23	NR_044986	74076	Mm.50114	NR_044986	ENSMUSG00000097494	4933406C10Rik	-	RIKEN cDNA 4933406C10 gene	ncRNA
68.4716	-0.258206	0.352908	-0.731653	0.464381	0.931076	Cx3cr1WT-Cx3cr1KO	chr3	97158714	97159033	+	1000	promoter-TSS (NM_019800)	promoter-TSS (NM_019800)	96	NM_019800	66659	Mm.101368	NM_019800	ENSMUSG00000028093	Acp6	5730559A09Rik|ACPL1|AU022842|mPACPL1	acid phosphatase 6, lysophosphatidic	protein-coding
137.42	0.345775	0.30282	1.14185	0.253516	0.860779	Cx3cr1WT-Cx3cr1KO	chr7	59228736	59228946	+	1000	promoter-TSS (NM_173010)	promoter-TSS (NM_173010)	91	NM_173010	22215	Mm.9002	NM_011668	ENSMUSG00000025326	Ube3a	4732496B02|5830462N02Rik|A130086L21Rik|Hpve6a	ubiquitin protein ligase E3A	protein-coding
110.631	-0.547296	0.351538	-1.55686	0.119503	0.733372	Cx3cr1WT-Cx3cr1KO	chr11	55469024	55469284	+	1000	promoter-TSS (NM_013716)	promoter-TSS (NM_013716)	-598	NM_013716	27041	Mm.39631	NM_013716	ENSMUSG00000018583	G3bp1	AI849976|B430204O07|C87777|G3bp|mKIAA4115	GTPase activating protein (SH3 domain) binding protein 1	protein-coding
122.928	-0.291363	0.310761	-0.937578	0.348461	0.902562	Cx3cr1WT-Cx3cr1KO	chr15	75862222	75862485	+	1000	promoter-TSS (NM_026960)	promoter-TSS (NM_026960)	14	NM_026960	69146	Mm.27385	NM_026960	ENSMUSG00000022575	Gsdmd	1810036L03Rik|AW558049|DF5L|Dfna5l|Gsdmdc1|M2-4	gasdermin D	protein-coding
48.7182	0.135146	0.3636	0.371688	0.710126	0.981042	Cx3cr1WT-Cx3cr1KO	chr4	43454440	43454672	+	1000	promoter-TSS (NM_007654)	promoter-TSS (NM_007654)	70	NM_001110320	12517	Mm.188157	NM_007654	ENSMUSG00000028459	Cd72	CD72c|Ly-19|Ly-32|Ly-m19|Lyb-2	CD72 antigen	protein-coding
122.821	0.0979915	0.309144	0.316977	0.751261	0.982855	Cx3cr1WT-Cx3cr1KO	chr9	53384508	53384736	+	1000	intron (NM_212445, intron 1 of 7)	intron (NM_212445, intron 1 of 7)	599	NM_212445	68304	Mm.427519	NM_212445	ENSMUSG00000034487	Kdelc2	2010004J24Rik|4833410J10Rik|AW549401	KDEL (Lys-Asp-Glu-Leu) containing 2	protein-coding
64.1838	0.21003	0.355776	0.590343	0.55496	0.952473	Cx3cr1WT-Cx3cr1KO	chr11	115708000	115708264	+	1000	intron (NM_008163, intron 1 of 5)	CpG	465	NM_008163	14784	Mm.439649	NM_008163	ENSMUSG00000059923	Grb2	AA408164|Ash	growth factor receptor bound protein 2	protein-coding
155.434	0.425788	0.302082	1.40951	0.158684	0.792644	Cx3cr1WT-Cx3cr1KO	chr5	64803391	64803654	+	1000	promoter-TSS (NM_008453)	promoter-TSS (NM_008453)	-1	NM_008453	16599	Mm.392759	NM_008453	ENSMUSG00000029178	Klf3	9930027G08Rik|AL024007|Bklf|Tef-2	Kruppel-like factor 3 (basic)	protein-coding
127.463	0.179966	0.30604	0.588048	0.5565	0.952473	Cx3cr1WT-Cx3cr1KO	chr16	44140437	44140746	+	1000	intron (NM_028108, intron 1 of 4)	intron (NM_028108, intron 1 of 4)	782	NM_028108	72117	Mm.278726	NM_028108	ENSMUSG00000022698	Naa50	2600005K24Rik|2810441M03Rik|AW112078|Mak3|Mak3p|Nat13|Nat5|San	N(alpha)-acetyltransferase 50, NatE catalytic subunit	protein-coding
154.135	-0.591403	0.319664	-1.85008	0.0643025	0.613339	Cx3cr1WT-Cx3cr1KO	chr5	34369410	34369712	+	1000	promoter-TSS (NM_001243123)	promoter-TSS (NM_001243123)	-372	NM_001243123	231128	Mm.286885	NM_001030306	ENSMUSG00000037210	Fam193a	-	family with sequence similarity 193, member A	protein-coding
90.9761	0.12279	0.338831	0.362393	0.717059	0.981327	Cx3cr1WT-Cx3cr1KO	chr5	52190295	52190548	+	1000	promoter-TSS (NR_015537)	promoter-TSS (NR_015537)	125	NR_104311	13204	Mm.993	NM_007839	ENSMUSG00000029169	Dhx15	DBP1|DEAH9|Ddx15|HRH2|mDEAH9	DEAH (Asp-Glu-Ala-His) box polypeptide 15	protein-coding
121.415	0.111643	0.320768	0.34805	0.727803	0.981655	Cx3cr1WT-Cx3cr1KO	chr16	13109820	13110046	+	1000	5' UTR (NM_015769, exon 1 of 11)	5' UTR (NM_015769, exon 1 of 11)	197	NM_015769	50505	Mm.287837	NM_015769	ENSMUSG00000022545	Ercc4	AI606920|Xpf	excision repair cross-complementing rodent repair deficiency, complementation group 4	protein-coding
176.454	0.00764183	0.298676	0.0255857	0.979588	0.998197	Cx3cr1WT-Cx3cr1KO	chr6	114643059	114643318	+	1000	promoter-TSS (NM_028835)	promoter-TSS (NM_028835)	91	NM_001253718	74244	Mm.275332	NM_028835	ENSMUSG00000030314	Atg7	1810013K23Rik|Agp7|Apg7l|Atg7l|Gm21553	autophagy related 7	protein-coding
163.933	-0.0778806	0.285144	-0.273127	0.784755	0.986928	Cx3cr1WT-Cx3cr1KO	chr9	7872844	7873194	+	1000	5' UTR (NM_007464, exon 1 of 9)	5' UTR (NM_007464, exon 1 of 9)	151	NM_007464	11796	Mm.2026	NM_007464	ENSMUSG00000032000	Birc3	AW107670|Api1|Api2|Birc2|C-IAP2|HIAP2|IAP1|IAP2|MIAP1|MIAP2|MIHB|MIHC|RNF49|cIAP-1|cIAP-2|cIAP1|cIAP2	baculoviral IAP repeat-containing 3	protein-coding
99.5503	0.12084	0.332601	0.363319	0.716366	0.981327	Cx3cr1WT-Cx3cr1KO	chr5	137787196	137787434	+	1000	promoter-TSS (NM_144913)	promoter-TSS (NM_144913)	-16	NM_001360023	381678	Mm.332765	NM_001005426	ENSMUSG00000037108	Zcwpw1	Gm1053	zinc finger, CW type with PWWP domain 1	protein-coding
95.9021	0.0300291	0.350101	0.0857726	0.931647	0.995205	Cx3cr1WT-Cx3cr1KO	chr12	83922113	83922322	+	1000	promoter-TSS (NR_073563)	promoter-TSS (NR_073563)	-283	NR_073564	18222	Mm.4390	NM_010949	ENSMUSG00000021224	Numb	Nb	NUMB endocytic adaptor protein	protein-coding
41.8539	-0.487919	0.362752	-1.34505	0.17861	NA	Cx3cr1WT-Cx3cr1KO	chr17	17374504	17374712	+	1000	exon (NM_025934, exon 1 of 10)	exon (NM_025934, exon 1 of 10)	276	NM_025934	67045	Mm.35117	NM_025934	ENSMUSG00000023852	Riok2	2010110K24Rik|2410085M17Rik	RIO kinase 2	protein-coding
68.2191	0.156764	0.363388	0.431396	0.66618	0.97418	Cx3cr1WT-Cx3cr1KO	chr4	127061032	127061304	+	1000	promoter-TSS (NM_001356311)	promoter-TSS (NM_001356311)	-14	NM_001356311	68310	Mm.273806	NM_026670	ENSMUSG00000043872	Zmym1	5830412B09Rik|AW209050	zinc finger, MYM domain containing 1	protein-coding
149.154	-0.368173	0.301751	-1.22012	0.222419	0.854106	Cx3cr1WT-Cx3cr1KO	chrX	74305188	74305459	+	1000	TTS (NM_018794)	TTS (NM_018794)	311	NM_010273	14567	Mm.205830	NM_010273	ENSMUSG00000015291	Gdi1	GDIA|GDIalpha	guanosine diphosphate (GDP) dissociation inhibitor 1	protein-coding
572.464	-0.126933	0.200995	-0.631521	0.5277	0.947185	Cx3cr1WT-Cx3cr1KO	chr7	111082864	111083077	+	1000	promoter-TSS (NM_001040131)	promoter-TSS (NM_001040131)	60	NM_001040131	13690	Mm.185453	NM_013507	ENSMUSG00000005610	Eif4g2	DAP-5|E130105L11Rik|Nat1|Natm1|p97	eukaryotic translation initiation factor 4, gamma 2	protein-coding
198.837	0.0390458	0.290334	0.134486	0.893019	0.993944	Cx3cr1WT-Cx3cr1KO	chr11	5099915	5100151	+	1000	promoter-TSS (NM_001283063)	promoter-TSS (NM_001283063)	-132	NM_001290493	279766	Mm.260866	NM_177370	ENSMUSG00000034175	Rhbdd3	Ptag	rhomboid domain containing 3	protein-coding
374.64	-0.250864	0.219762	-1.14153	0.25365	0.860829	Cx3cr1WT-Cx3cr1KO	chr13	54590185	54590395	+	1000	promoter-TSS (NM_025933)	promoter-TSS (NM_025933)	59	NM_025933	67044	Mm.29353	NM_025933	ENSMUSG00000025868	Higd2a	2010110M21Rik|AA690237	HIG1 domain family, member 2A	protein-coding
135.871	0.296583	0.327108	0.90668	0.364576	0.906712	Cx3cr1WT-Cx3cr1KO	chr2	45112841	45113125	+	1000	non-coding (NR_110572, exon 2 of 3)	non-coding (NR_110572, exon 2 of 3)	269	NM_001355290	24136	Mm.440702	NM_015753	ENSMUSG00000026872	Zeb2	9130203F04Rik|D130016B08Rik|SIP1|Zfhx1b|Zfx1b|Zfxh1b	zinc finger E-box binding homeobox 2	protein-coding
43.455	-0.0860505	0.362854	-0.237149	0.812541	NA	Cx3cr1WT-Cx3cr1KO	chr7	122067290	122067540	+	1000	promoter-TSS (NM_026140)	promoter-TSS (NM_026140)	217	NM_138589	28018	Mm.282122	NM_138589	ENSMUSG00000030870	Ubfd1	AI467302|D7Wsu105e|D7Wsu128e|Ubph	ubiquitin family domain containing 1	protein-coding
89.695	0.126581	0.338725	0.373698	0.708629	0.979914	Cx3cr1WT-Cx3cr1KO	chr6	83101502	83101743	+	1000	5' UTR (NM_001081266, exon 1 of 9)	5' UTR (NM_001081266, exon 1 of 9)	106	NM_001081266	243510	Mm.436553	NM_001081266	ENSMUSG00000107499	Ccdc142	A230058J24Rik	coiled-coil domain containing 142	protein-coding
35.4295	-0.785699	0.361735	-2.17203	0.0298536	NA	Cx3cr1WT-Cx3cr1KO	chr10	24150116	24150411	+	1000	intron (NM_016797, intron 1 of 9)	intron (NM_016797, intron 1 of 9)	946	NM_016797	53331	Mm.248042	NM_016797	ENSMUSG00000019998	Stx7	AI315064|AI317144|AW107239|Syn7	syntaxin 7	protein-coding
181.134	0.373212	0.284838	1.31026	0.190107	0.825863	Cx3cr1WT-Cx3cr1KO	chr4	34882832	34883154	+	1000	promoter-TSS (NM_013889)	promoter-TSS (NM_013889)	-45	NM_013889	30046	Mm.38193	NM_013889	ENSMUSG00000039967	Zfp292	5730450D02Rik|5830493J20Rik|9430062L07Rik|AI449016|Krox-10|Zfp-15|Zfp15|Zn-15|Zn-16|mKIAA0530	zinc finger protein 292	protein-coding
92.2505	-0.306044	0.341519	-0.896125	0.370186	0.909567	Cx3cr1WT-Cx3cr1KO	chr11	53891503	53891730	+	1000	promoter-TSS (NM_011396)	promoter-TSS (NM_011396)	87	NM_011396	20520	Mm.42253	NM_011396	ENSMUSG00000018900	Slc22a5	Lstpl|Octn2|jvs	solute carrier family 22 (organic cation transporter), member 5	protein-coding
97.6451	-0.189467	0.330228	-0.573745	0.56614	0.953728	Cx3cr1WT-Cx3cr1KO	chr9	14500598	14500807	+	1000	promoter-TSS (NM_023153)	promoter-TSS (NM_023153)	83	NM_023153	66070	Mm.245938	NM_023153	ENSMUSG00000004096	Cwc15	0610040D20Rik|2900052N06Rik|Ed1|c11orf5|mED1	CWC15 spliceosome-associated protein	protein-coding
269.607	0.171858	0.243094	0.706963	0.479589	0.931076	Cx3cr1WT-Cx3cr1KO	chr16	91546572	91546792	+	1000	promoter-TSS (NM_008338)	promoter-TSS (NM_008338)	-412	NM_008338	15980	Mm.249364	NM_008338	ENSMUSG00000022965	Ifngr2	Ifgr2|Ifgt	interferon gamma receptor 2	protein-coding
112.263	0.331379	0.322056	1.02895	0.303504	0.892713	Cx3cr1WT-Cx3cr1KO	chr13	104109367	104109638	+	1000	promoter-TSS (NM_001361054)	promoter-TSS (NM_001361054)	112	NM_029447	75805	Mm.127692	NM_029447	ENSMUSG00000021710	Nln	4930472G13Rik|C79345	neurolysin (metallopeptidase M3 family)	protein-coding
26.4024	0.782367	0.356169	2.19662	0.0280476	NA	Cx3cr1WT-Cx3cr1KO	chr16	65562587	65562816	+	1000	promoter-TSS (NM_026879)	promoter-TSS (NM_026879)	-4	NM_026879	68942	Mm.432944	NM_026879	ENSMUSG00000004843	Chmp2b	1190006E07Rik	charged multivesicular body protein 2B	protein-coding
71.0677	0.897876	0.350377	2.5626	0.0103892	0.348255	Cx3cr1WT-Cx3cr1KO	chr3	158036385	158036679	+	1000	promoter-TSS (NM_001289524)	promoter-TSS (NM_001289524)	107	NM_001093752	69207	Mm.223946	NM_026989	ENSMUSG00000055436	Srsf11	0610009J05Rik|2610019N13Rik|BF642805|Sfrs11	serine/arginine-rich splicing factor 11	protein-coding
178.187	0.417897	0.28545	1.46399	0.143196	0.772667	Cx3cr1WT-Cx3cr1KO	chr3	96696368	96696597	+	1000	promoter-TSS (NM_018812)	promoter-TSS (NM_018812)	107	NM_146135	229615	Mm.1635	NM_018812	ENSMUSG00000028101	Pias3	Pias3l	protein inhibitor of activated STAT 3	protein-coding
67.2711	-0.0591227	0.350227	-0.168812	0.865944	0.993944	Cx3cr1WT-Cx3cr1KO	chr17	88529763	88530058	+	1000	promoter-TSS (NM_028658)	promoter-TSS (NM_028658)	-214	NM_028658	73825	Mm.271817	NM_028658	ENSMUSG00000034709	Ppp1r21	1110018J12Rik|AI426045|AW550781|Ccdc128|Klraq1	protein phosphatase 1, regulatory subunit 21	protein-coding
133.771	-0.0248268	0.319471	-0.077712	0.938057	0.996062	Cx3cr1WT-Cx3cr1KO	chr5	96209848	96210235	+	1000	promoter-TSS (NM_053158)	promoter-TSS (NM_053158)	-74	NM_001039084	94061	Mm.295499	NM_053158	ENSMUSG00000029486	Mrpl1	2410002L03Rik|5830418D04Rik|AI462572|L1mt	mitochondrial ribosomal protein L1	protein-coding
65.6206	0.305723	0.352806	0.866545	0.386191	0.914739	Cx3cr1WT-Cx3cr1KO	chr4	147940794	147941004	+	1000	promoter-TSS (NM_029841)	promoter-TSS (NM_029841)	4	NM_029841	77034	Mm.183076	NM_029841	ENSMUSG00000044496	2510039O18Rik	Kiaa2013	RIKEN cDNA 2510039O18 gene	protein-coding
88.2482	0.864572	0.344207	2.51178	0.0120123	0.373973	Cx3cr1WT-Cx3cr1KO	chr10	52417401	52417704	+	1000	promoter-TSS (NM_030250)	promoter-TSS (NM_030250)	5	NM_030250	52014	Mm.199964	NM_030250	ENSMUSG00000023068	Nus1	1600027K07Rik|AU019165|AW538011|BC003223|D10Ertd438e	NUS1 dehydrodolichyl diphosphate synthase subunit	protein-coding
71.6094	-0.216991	0.349928	-0.620102	0.535191	0.947185	Cx3cr1WT-Cx3cr1KO	chr4	49631996	49632198	+	1000	promoter-TSS (NM_001163263)	promoter-TSS (NM_001163263)	37	NM_182999	109331	Mm.24765	NM_182999	ENSMUSG00000028309	Rnf20	4833430L21Rik|AW540162|C79397|mKIAA4116	ring finger protein 20	protein-coding
99.4394	-0.306234	0.338956	-0.903464	0.36628	0.907754	Cx3cr1WT-Cx3cr1KO	chr2	37443201	37443467	+	1000	promoter-TSS (NM_146121)	promoter-TSS (NM_146121)	49	NM_146121	227800	Mm.383192	NM_146121	ENSMUSG00000035437	Rabgap1	Gapcena|mKIAA4104	RAB GTPase activating protein 1	protein-coding
201.681	0.0986021	0.273693	0.360266	0.718649	0.98161	Cx3cr1WT-Cx3cr1KO	chr8	123373695	123373962	+	1000	5' UTR (NM_001037877, exon 1 of 18)	5' UTR (NM_001037877, exon 1 of 18)	117	NM_001286363	66855	Mm.178818	NM_025804	ENSMUSG00000001472	Tcf25	1100001J13Rik|1810041K11Rik|D8Ertd325e|Nulp1|mKIAA1049	transcription factor 25 (basic helix-loop-helix)	protein-coding
219.549	0.719358	0.264502	2.71967	0.00653481	0.286759	Cx3cr1WT-Cx3cr1KO	chr3	89913056	89913318	+	1000	promoter-TSS (NM_001310676)	promoter-TSS (NM_001310676)	9	NM_001310676	16194	Mm.2856	NM_010559	ENSMUSG00000027947	Il6ra	CD126|IL-6R|IL-6R-alpha|IL-6RA|Il6r	interleukin 6 receptor, alpha	protein-coding
63.3384	0.0123356	0.356383	0.0346135	0.972388	0.998197	Cx3cr1WT-Cx3cr1KO	chr8	95807305	95807532	+	1000	promoter-TSS (NM_178078)	promoter-TSS (NM_178078)	44	NM_178078	234594	Mm.259220	NM_153164	ENSMUSG00000036550	Cnot1	6030411K04Rik|AA815922|D830048B13	CCR4-NOT transcription complex, subunit 1	protein-coding
40.9128	-0.179649	0.363533	-0.494174	0.621183	NA	Cx3cr1WT-Cx3cr1KO	chr9	103365478	103365696	+	1000	promoter-TSS (NM_001134427)	promoter-TSS (NM_001134427)	193	NM_001134426	321022	Mm.261025	NM_175565	ENSMUSG00000032803	Cdv3	2510010F10Rik|C230084J24Rik|C79446|TPP36	carnitine deficiency-associated gene expressed in ventricle 3	protein-coding
71.7686	0.559323	0.349593	1.59993	0.109615	0.714959	Cx3cr1WT-Cx3cr1KO	chr7	119895578	119895793	+	1000	promoter-TSS (NM_173408)	promoter-TSS (NM_173408)	60	NM_001163703	233805	Mm.31539	NM_173408	ENSMUSG00000048787	Dcun1d3	1700020A13Rik|BC030335	DCN1, defective in cullin neddylation 1, domain containing 3 (S. cerevisiae)	protein-coding
144.004	-0.288304	0.307008	-0.939076	0.347692	0.902562	Cx3cr1WT-Cx3cr1KO	chr11	97995771	97996168	+	1000	non-coding (NR_152188, exon 1 of 6)	non-coding (NR_152188, exon 1 of 6)	204	NM_207231	217151	Mm.277896	NM_207231	ENSMUSG00000038352	Arl5c	Arl12|BC065791	ADP-ribosylation factor-like 5C	protein-coding
226.719	0.58202	0.255735	2.27587	0.0228539	0.457261	Cx3cr1WT-Cx3cr1KO	chr11	103132713	103132991	+	1000	promoter-TSS (NM_027658)	promoter-TSS (NM_027658)	-487	NM_001130516	71059	Mm.273871	NM_027658	ENSMUSG00000043372	Hexim2	4933402L21Rik	hexamethylene bis-acetamide inducible 2	protein-coding
54.9553	-0.194665	0.361226	-0.5389	0.589956	0.958203	Cx3cr1WT-Cx3cr1KO	chr7	126703714	126703965	+	1000	intron (NM_009898, intron 1 of 10)	intron (NM_009898, intron 1 of 10)	381	NM_001301374	12721	Mm.290482	NM_009898	ENSMUSG00000030707	Coro1a	Clabp|Lmb3|TACO|p57	coronin, actin binding protein 1A	protein-coding
500.349	-0.466682	0.208411	-2.23924	0.0251403	0.46791	Cx3cr1WT-Cx3cr1KO	chr11	78984736	78984965	+	1000	promoter-TSS (NM_001159301)	promoter-TSS (NM_001159301)	74	NM_001159301	16859	Mm.341434	NM_010708	ENSMUSG00000001123	Lgals9	AA407335|AI194909|AI265545|LGALS35|Lgals5|gal-9|galectin-9	lectin, galactose binding, soluble 9	protein-coding
47.0031	0.0174761	0.363614	0.0480622	0.961667	0.998197	Cx3cr1WT-Cx3cr1KO	chr2	155592665	155592980	+	1000	promoter-TSS (NM_008180)	promoter-TSS (NM_008180)	-12	NM_008180	14854	Mm.252316	NM_008180	ENSMUSG00000027610	Gss	AI314904|GS-A/GS-B|GSH-S	glutathione synthetase	protein-coding
74.2513	-0.18912	0.350318	-0.539854	0.589298	0.957758	Cx3cr1WT-Cx3cr1KO	chr9	119401804	119402016	+	1000	promoter-TSS (NM_001313757)	promoter-TSS (NM_001313757)	-268	NM_007397	11481	Mm.8940	NM_007397	ENSMUSG00000061393	Acvr2b	4930516B21Rik|ActRIIB	activin receptor IIB	protein-coding
60.4721	-0.0523448	0.36338	-0.14405	0.885461	0.993944	Cx3cr1WT-Cx3cr1KO	chr11	26387122	26387482	+	1000	non-coding (NR_102382, exon 1 of 12)	non-coding (NR_102382, exon 1 of 12)	218	NR_102382	67030	Mm.18875	NM_025923	ENSMUSG00000004018	Fancl	2010322C19Rik|AW554273|B230118H11Rik|Phf9|Pog|gcd	Fanconi anemia, complementation group L	protein-coding
83.5186	-0.512814	0.34872	-1.47056	0.14141	0.770999	Cx3cr1WT-Cx3cr1KO	chr17	46711278	46711558	+	1000	promoter-TSS (NM_145488)	promoter-TSS (NM_145488)	-45	NM_145488	224824	Mm.299399	NM_145488	ENSMUSG00000002763	Pex6	AI132582|D130055I09Rik|mKIAA4177	peroxisomal biogenesis factor 6	protein-coding
87.0051	0.0204432	0.346206	0.0590492	0.952913	0.998197	Cx3cr1WT-Cx3cr1KO	chr9	18473488	18473737	+	1000	promoter-TSS (NM_028935)	promoter-TSS (NM_028935)	33	NM_028160	72230	Mm.289689	NM_028160	ENSMUSG00000074500	Zfp558	1700007A21Rik|4932704I17Rik|Zfp558-ps	zinc finger protein 558	protein-coding
149.189	0.611191	0.29261	2.08876	0.0367297	0.5246	Cx3cr1WT-Cx3cr1KO	chr11	109362914	109363152	+	1000	exon (NM_010303, exon 1 of 4)	exon (NM_010303, exon 1 of 4)	202	NM_001359034	14674	Mm.193925	NM_010303	ENSMUSG00000020611	Gna13	AU024132|AU043124|Galpha13	guanine nucleotide binding protein, alpha 13	protein-coding
89.3846	0.0525636	0.335773	0.156545	0.875603	0.993944	Cx3cr1WT-Cx3cr1KO	chr8	117157667	117157913	+	1000	promoter-TSS (NM_001081151)	promoter-TSS (NM_001081151)	-345	NM_001081151	209239	Mm.132992	NM_001081151	ENSMUSG00000052557	Gan	A330045G18|gigaxonin	giant axonal neuropathy	protein-coding
121.768	0.391629	0.312627	1.2527	0.210314	0.84677	Cx3cr1WT-Cx3cr1KO	chr11	102230011	102230273	+	1000	promoter-TSS (NM_001284250)	promoter-TSS (NM_001284250)	8	NR_106179	102465892		NR_106179	ENSMUSG00000098863	Mir8101	Gm27705|mmu-mir-8101	microRNA 8101	ncRNA
206.056	-0.247574	0.273319	-0.905808	0.365037	0.906712	Cx3cr1WT-Cx3cr1KO	chr17	69417185	69417631	+	1000	non-coding (NR_026848, exon 1 of 1)	non-coding (NR_026848, exon 1 of 1)	961	NR_026848	77533	Mm.266592	NR_026848		C030034I22Rik	-	RIKEN cDNA C030034I22 gene	ncRNA
264.688	-0.184658	0.250548	-0.737018	0.461112	0.931076	Cx3cr1WT-Cx3cr1KO	chr17	32321032	32321297	+	1000	promoter-TSS (NR_131218)	promoter-TSS (NR_131218)	74	NM_001357760	56399	Mm.328945	NM_019774	ENSMUSG00000024045	Akap8	1200016A02Rik|AA673585|AKAP-8|AKAP95|AU015639	A kinase (PRKA) anchor protein 8	protein-coding
45.6266	0.507727	0.363483	1.39684	0.162463	NA	Cx3cr1WT-Cx3cr1KO	chr8	110919793	110919992	+	1000	promoter-TSS (NM_009179)	promoter-TSS (NM_009179)	27	NM_009179	20444	Mm.200388	NM_009179	ENSMUSG00000031749	St3gal2	AI429591|AW822065|ST3GalII|Siat5	ST3 beta-galactoside alpha-2,3-sialyltransferase 2	protein-coding
104.428	0.285886	0.339442	0.842223	0.399663	0.914739	Cx3cr1WT-Cx3cr1KO	chr18	53744462	53744692	+	1000	promoter-TSS (NM_178686)	promoter-TSS (NM_178686)	-30	NM_178686	225523	Mm.193678	NM_178686	ENSMUSG00000048799	Cep120	A230075C01|AU016693|Ccdc100	centrosomal protein 120	protein-coding
69.5471	0.374749	0.352536	1.06301	0.287778	0.885562	Cx3cr1WT-Cx3cr1KO	chr2	122234695	122234973	+	1000	promoter-TSS (NM_146126)	promoter-TSS (NM_146126)	-5	NM_146126	20322	Mm.371580	NM_146126	ENSMUSG00000027227	Sord	Sdh-1|Sdh1|Sodh-1	sorbitol dehydrogenase	protein-coding
32.7673	-0.593423	0.359618	-1.65015	0.0989126	NA	Cx3cr1WT-Cx3cr1KO	chrX	7883927	7884171	+	1000	promoter-TSS (NM_078484)	promoter-TSS (NM_078484)	-195	NM_001083937	22232	Mm.214976	NM_078484	ENSMUSG00000031156	Slc35a2	AI327289|Had-1|Had1|Sfc8|UGT|Ugalt	solute carrier family 35 (UDP-galactose transporter), member A2	protein-coding
24.3241	-0.495186	0.337217	-1.46845	0.141982	NA	Cx3cr1WT-Cx3cr1KO	chr7	19822883	19823093	+	1000	promoter-TSS (NM_033601)	promoter-TSS (NM_033601)	-233	NM_033601	12051	Mm.439658	NM_033601	ENSMUSG00000053175	Bcl3	AI528691|Bcl-3	B cell leukemia/lymphoma 3	protein-coding
87.5068	0.820798	0.337242	2.43385	0.0149391	0.393506	Cx3cr1WT-Cx3cr1KO	chr14	61556456	61556812	+	1000	5' UTR (NM_025697, exon 1 of 5)	5' UTR (NM_025697, exon 1 of 5)	252	NM_025697	66674	Mm.282706	NM_025697	ENSMUSG00000021930	Spryd7	6330409N04Rik|Clld6	SPRY domain containing 7	protein-coding
140.81	-0.00486097	0.302771	-0.0160549	0.987191	0.998197	Cx3cr1WT-Cx3cr1KO	chr17	74316367	74316640	+	1000	promoter-TSS (NM_001146223)	promoter-TSS (NM_001146223)	-70	NM_001146223	66310	Mm.28536	NM_024428	ENSMUSG00000024067	Dpy30	2810410M20Rik|C87842	dpy-30, histone methyltransferase complex regulatory subunit	protein-coding
177.042	0.15237	0.299992	0.507912	0.611515	0.958833	Cx3cr1WT-Cx3cr1KO	chr12	79296348	79296579	+	1000	promoter-TSS (NM_001252562)	promoter-TSS (NM_001252562)	-181	NM_001008550	211978	Mm.297919	NM_001008550	ENSMUSG00000066440	Zfyve26	4930465A13|9330197E15Rik|A630028O16Rik|Gm893|mKIAA0321	zinc finger, FYVE domain containing 26	protein-coding
435.055	0.266284	0.202479	1.31512	0.18847	0.822001	Cx3cr1WT-Cx3cr1KO	chr12	86241828	86242051	+	1000	promoter-TSS (NM_001324488)	promoter-TSS (NM_001324488)	81	NM_001324488	70373	Mm.252967	NM_027405	ENSMUSG00000021254	Gpatch2l	1700020O03Rik|4732487G21Rik|A630090I05Rik|Kiaa1152	G patch domain containing 2 like	protein-coding
110.123	1.31937	0.324122	4.07059	4.6895e-05	0.0274175	Cx3cr1WT-Cx3cr1KO	chr1	52232326	52232648	+	1000	intron (NM_001081081, intron 1 of 17)	CpG	745	NM_001081081	14660	Mm.398608	NM_001081081	ENSMUSG00000026103	Gls	6330442B14|AI314027|B230365M23Rik	glutaminase	protein-coding
83.6728	-0.153756	0.349173	-0.440345	0.659687	0.972496	Cx3cr1WT-Cx3cr1KO	chr7	143599831	143600112	+	1000	intron (NM_013742, intron 1 of 22)	intron (NM_013742, intron 1 of 22)	119	NM_001252593	27267	Mm.125659	NM_013742	ENSMUSG00000010755	Cars	CA3	cysteinyl-tRNA synthetase	protein-coding
49.3316	0.346182	0.362857	0.954046	0.34006	0.902562	Cx3cr1WT-Cx3cr1KO	chr9	13246861	13247170	+	1000	promoter-TSS (NM_025534)	promoter-TSS (NM_025534)	59	NM_025534	66396	Mm.290620	NM_025534	ENSMUSG00000079084	Ccdc82	2310043N13Rik	coiled-coil domain containing 82	protein-coding
97.4357	-0.00270831	0.342988	-0.00789623	0.9937	0.999755	Cx3cr1WT-Cx3cr1KO	chr19	6979570	6979944	+	1000	promoter-TSS (NM_001360288)	promoter-TSS (NM_001360288)	329	NM_001360286	14227	Mm.4234	NM_008020	ENSMUSG00000056629	Fkbp2	mFKBP13|mFKBP2	FK506 binding protein 2	protein-coding
316.873	-0.413296	0.252922	-1.63408	0.102241	0.705177	Cx3cr1WT-Cx3cr1KO	chr1	156036177	156036517	+	1000	5' UTR (NM_001160018, exon 1 of 10)	5' UTR (NM_001160018, exon 1 of 10)	133	NM_144791	208263	Mm.211654	NM_144791	ENSMUSG00000026466	Tor1aip1	LAP1|Lap1B	torsin A interacting protein 1	protein-coding
42.914	0.0268715	0.363618	0.0739002	0.94109	NA	Cx3cr1WT-Cx3cr1KO	chr5	147077464	147077707	+	1000	5' UTR (NM_181730, exon 1 of 3)	5' UTR (NM_181730, exon 1 of 3)	239	NM_009087	20018	Mm.317557	NM_009087	ENSMUSG00000029642	Polr1d	1110003G10Rik|AC19|RPA16|Rpo1-3	polymerase (RNA) I polypeptide D	protein-coding
81.3281	0.00715596	0.359234	0.01992	0.984107	0.998197	Cx3cr1WT-Cx3cr1KO	chr11	96034742	96034942	+	1000	promoter-TSS (NM_033568)	promoter-TSS (NM_033568)	-43	NM_033568	27681	Mm.372235	NM_033568	ENSMUSG00000006058	Snf8	D11Moh34	SNF8, ESCRT-II complex subunit, homolog (S. cerevisiae)	protein-coding
133.857	-0.393716	0.305755	-1.28768	0.197856	0.835005	Cx3cr1WT-Cx3cr1KO	chr10	128270488	128270708	+	1000	promoter-TSS (NM_019963)	promoter-TSS (NM_019963)	100	NM_019963	20847	Mm.293120	NM_019963	ENSMUSG00000040033	Stat2	1600010G07Rik|AW496480	signal transducer and activator of transcription 2	protein-coding
236.399	-0.237932	0.263074	-0.90443	0.365767	0.907754	Cx3cr1WT-Cx3cr1KO	chr18	35598584	35598800	+	1000	promoter-TSS (NM_001357472)	promoter-TSS (NM_001357472)	75	NM_001357472	67869	Mm.126534	NM_026420	ENSMUSG00000037058	Paip2	2310050K10Rik|AU045972	polyadenylate-binding protein-interacting protein 2	protein-coding
66.8065	0.342847	0.359195	0.954487	0.339837	0.902562	Cx3cr1WT-Cx3cr1KO	chr14	52316046	52316305	+	1000	5' UTR (NM_001244916, exon 1 of 2)	5' UTR (NM_001244916, exon 1 of 2)	148	NM_001244916	50524	Mm.39487	NM_015772	ENSMUSG00000049532	Sall2	AI225809|AW559097|Msal-2|Sal-2|mKIAA0360|p150(Sal2)	spalt like transcription factor 2	protein-coding
82.1869	0.631706	0.347996	1.81527	0.0694827	0.625958	Cx3cr1WT-Cx3cr1KO	chr5	145083781	145084020	+	1000	promoter-TSS (NM_019767)	promoter-TSS (NM_019767)	31	NM_019767	56443	Mm.371610	NM_019767	ENSMUSG00000029621	Arpc1a	0610010H08Rik|1110030K07Rik|41kDa|AA407347|Sid32|Sid329	actin related protein 2/3 complex, subunit 1A	protein-coding
119.729	-0.245213	0.336266	-0.729224	0.465865	0.931076	Cx3cr1WT-Cx3cr1KO	chr2	129129375	129129653	+	1000	promoter-TSS (NM_025395)	promoter-TSS (NM_025395)	-186	NM_025395	66170	Mm.40621	NM_025395	ENSMUSG00000037938	Chchd5	1110027L01Rik|AW045710	coiled-coil-helix-coiled-coil-helix domain containing 5	protein-coding
57.8328	0.885547	0.363227	2.438	0.0147689	0.393506	Cx3cr1WT-Cx3cr1KO	chr19	7341473	7341683	+	1000	5' UTR (NM_007928, exon 1 of 18)	5' UTR (NM_007928, exon 1 of 18)	282	NM_001080389	13728	Mm.258986	NM_007928	ENSMUSG00000024969	Mark2	EMK-1|Emk|Par-1|Par-1b	MAP/microtubule affinity regulating kinase 2	protein-coding
120.887	-0.65939	0.333775	-1.97555	0.0482059	0.560141	Cx3cr1WT-Cx3cr1KO	chr3	79628551	79628801	+	1000	promoter-TSS (NM_029482)	promoter-TSS (NM_029482)	91	NM_025794	66841	Mm.28336	NM_025794	ENSMUSG00000027809	Etfdh	0610010I20Rik|AV001013	electron transferring flavoprotein, dehydrogenase	protein-coding
32.12	-0.525136	0.360566	-1.45642	0.145276	NA	Cx3cr1WT-Cx3cr1KO	chrX	7657300	7657556	+	1000	promoter-TSS (NM_001290624)	promoter-TSS (NM_001290624)	49	NM_001290624	54630	Mm.232232	NM_175097	ENSMUSG00000031145	Prickle3	Lmo6|Pk3|Sfc16	prickle planar cell polarity protein 3	protein-coding
269.82	0.0403304	0.241603	0.166928	0.867427	0.993944	Cx3cr1WT-Cx3cr1KO	chr3	57736017	57736386	+	1000	intron (NR_130743, intron 1 of 9)	CpG	144	NR_130743	24017	Mm.274360	NM_011883	ENSMUSG00000036503	Rnf13	2010001H16Rik|Rzf	ring finger protein 13	protein-coding
142.592	-0.315281	0.321883	-0.979489	0.327338	0.900571	Cx3cr1WT-Cx3cr1KO	chr8	105827014	105827280	+	1000	promoter-TSS (NM_024445)	promoter-TSS (NM_024445)	203	NM_145824	74334	Mm.4206	NM_145824	ENSMUSG00000037415	Ranbp10	4432417N03Rik	RAN binding protein 10	protein-coding
220.892	-0.146727	0.279882	-0.524248	0.600106	0.958557	Cx3cr1WT-Cx3cr1KO	chr16	56037596	56037832	+	1000	promoter-TSS (NM_029092)	promoter-TSS (NM_029092)	60	NM_029092	52575	Mm.288742	NM_029092	ENSMUSG00000044763	Trmt10c	1300018J16Rik|D16Ertd454e|Rg9mtd1|Rnmtd1	tRNA methyltransferase 10C	protein-coding
148.74	-0.381782	0.30152	-1.26619	0.205444	0.840097	Cx3cr1WT-Cx3cr1KO	chr1	185362954	185363208	+	1000	promoter-TSS (NM_029735)	promoter-TSS (NM_029735)	37	NM_001357474	107508	Mm.154511	NM_029735	ENSMUSG00000026615	Eprs	2410081F06Rik|3010002K18Rik|C79379|Qprs	glutamyl-prolyl-tRNA synthetase	protein-coding
143.853	-0.599284	0.322141	-1.86032	0.0628403	0.607654	Cx3cr1WT-Cx3cr1KO	chr4	74251601	74251825	+	1000	promoter-TSS (NM_144787)	promoter-TSS (NM_144787)	-166	NM_144787	76804	Mm.209059	NM_144787	ENSMUSG00000028397	Kdm4c	2410141F18Rik|AA517467|Gasc1|Jmjd2c	lysine (K)-specific demethylase 4C	protein-coding
196.881	-0.0759034	0.274756	-0.276257	0.78235	0.986928	Cx3cr1WT-Cx3cr1KO	chr5	24451525	24451754	+	1000	promoter-TSS (NM_139153)	promoter-TSS (NM_139153)	-538	NM_001359881	213990	Mm.250703	NM_139153	ENSMUSG00000023353	Agap3	AGAP-3|AV028425|Centg3|Crag|Crag.|MRIP-1|cnt-g3	ArfGAP with GTPase domain, ankyrin repeat and PH domain 3	protein-coding
165.766	-0.0479276	0.307997	-0.15561	0.87634	0.993944	Cx3cr1WT-Cx3cr1KO	chr14	56811962	56812224	+	1000	promoter-TSS (NM_001253753)	promoter-TSS (NM_001253753)	104	NR_152252	100503842	Mm.297636	NR_152252	ENSMUSG00000100017	2410022M11Rik	-	RIKEN cDNA 2410022M11 gene	ncRNA
205.805	0.200009	0.272772	0.733245	0.463409	0.931076	Cx3cr1WT-Cx3cr1KO	chr15	75981835	75982165	+	1000	exon (NM_001163518, exon 1 of 1)	exon (NM_001163518, exon 1 of 1)	285	NM_001163518	223648	Mm.17610	NM_146059	ENSMUSG00000098176	Ccdc166	2410075B13Rik	coiled-coil domain containing 166	protein-coding
71.5014	0.696423	0.346074	2.01235	0.0441827	0.553093	Cx3cr1WT-Cx3cr1KO	chr11	121259579	121259863	+	1000	promoter-TSS (NM_001080932)	promoter-TSS (NM_001080932)	-266	NM_001080932	68837	Mm.209750	NM_001080932	ENSMUSG00000039275	Foxk2	1110054H05Rik|5730434B08Rik|6230415M23Rik|ILF|Ilf1	forkhead box K2	protein-coding
155.223	0.0299092	0.304569	0.0982019	0.921772	0.994647	Cx3cr1WT-Cx3cr1KO	chrX	13071889	13072121	+	1000	intron (NM_009481, intron 1 of 44)	CpG	507	NM_009481	22284	Mm.242646	NM_009481	ENSMUSG00000031010	Usp9x	5730589N07Rik|AA407302|AA407699|AL022658|AL022749|Dffrx|FAF-X|Fafl	ubiquitin specific peptidase 9, X chromosome	protein-coding
123.611	-0.0482042	0.311873	-0.154563	0.877165	0.993944	Cx3cr1WT-Cx3cr1KO	chr12	11266102	11266335	+	1000	promoter-TSS (NM_177331)	promoter-TSS (NM_177331)	332	NM_025695	67241	Mm.173953	NM_025695	ENSMUSG00000020608	Smc6	2810489L22Rik|3830418C19Rik|AA990493|AU018782|AW742439|SMC-6|Smc6l1|mKIAA4103	structural maintenance of chromosomes 6	protein-coding
36.0006	-0.365355	0.360706	-1.01289	0.311113	NA	Cx3cr1WT-Cx3cr1KO	chr9	121710252	121710493	+	1000	promoter-TSS (NM_026794)	promoter-TSS (NM_026794)	-17	NM_026794	26901	Mm.24848	NM_026794	ENSMUSG00000032526	Ss18l2	1110020I04Rik|AI463209|Deb1	SS18, nBAF chromatin remodeling complex subunit like 2	protein-coding
31.9235	-0.608239	0.361708	-1.68157	0.0926514	NA	Cx3cr1WT-Cx3cr1KO	chrX	100625744	100625949	+	1000	promoter-TSS (NM_028303)	promoter-TSS (NM_028303)	95	NM_028303	72621	Mm.291607	NM_028303	ENSMUSG00000015668	Pdzd11	1810012H22Rik|2310079D11Rik|2700099C19Rik|AI854765|Pdzk11	PDZ domain containing 11	protein-coding
71.0119	0.222369	0.359094	0.61925	0.535751	0.947185	Cx3cr1WT-Cx3cr1KO	chr6	85915509	85915797	+	1000	promoter-TSS (NM_001170488)	promoter-TSS (NM_001170488)	24	NM_023160	66116	Mm.13036	NM_023160	ENSMUSG00000057103	Nat8f1	1110002I11Rik|AI266962|Cml1	N-acetyltransferase 8 (GCN5-related) family member 1	protein-coding
74.7656	-0.366334	0.345663	-1.0598	0.289235	0.885562	Cx3cr1WT-Cx3cr1KO	chr18	35721088	35721308	+	1000	intron (NM_001033141, intron 1 of 8)	intron (NM_001033141, intron 1 of 8)	293	NM_001033141	68545	Mm.329362	NM_001033141	ENSMUSG00000073599	Ecscr	1110006O17Rik|ARIA	endothelial cell surface expressed chemotaxis and apoptosis regulator	protein-coding
152.236	0.523089	0.291678	1.79338	0.0729127	0.637849	Cx3cr1WT-Cx3cr1KO	chr11	96977147	96977388	+	1000	intron (NM_030220, intron 1 of 6)	CpG	421	NM_030220	78912	Mm.491183	NM_030220	ENSMUSG00000018678	Sp2	4930480I16Rik|mKIAA0048	Sp2 transcription factor	protein-coding
79.836	1.08881	0.342291	3.18094	0.001468	0.178455	Cx3cr1WT-Cx3cr1KO	chr1	160212680	160212885	+	1000	5' UTR (NM_009786, exon 1 of 6)	5' UTR (NM_009786, exon 1 of 6)	110	NM_009786	12301	Mm.10702	NM_009786	ENSMUSG00000014226	Cacybp	SIP	calcyclin binding protein	protein-coding
72.7654	-0.792915	0.359308	-2.20678	0.0273292	0.480051	Cx3cr1WT-Cx3cr1KO	chr3	122619520	122619729	+	1000	promoter-TSS (NM_153118)	promoter-TSS (NM_153118)	90	NM_153118	214459	Mm.209491	NM_153118	ENSMUSG00000039735	Fnbp1l	2610318I01Rik|AW548221|TOCA1|toca-1	formin binding protein 1-like	protein-coding
144.005	0.183768	0.306605	0.599365	0.54893	0.949981	Cx3cr1WT-Cx3cr1KO	chr7	81789240	81789573	+	1000	promoter-TSS (NM_026077)	promoter-TSS (NM_026077)	47	NM_026077	67290	Mm.248391	NM_026077	ENSMUSG00000025102	3110040N11Rik	AI851475	RIKEN cDNA 3110040N11 gene	protein-coding
86.9218	0.21794	0.341974	0.637299	0.52393	0.946726	Cx3cr1WT-Cx3cr1KO	chr1	181211894	181212120	+	1000	promoter-TSS (NM_145514)	promoter-TSS (NM_145514)	-29	NM_145514	226757	Mm.289082	NM_145514	ENSMUSG00000038733	Wdr26	1600024A01Rik|AA693241|AI447817|AU044014|C77982|Gid7	WD repeat domain 26	protein-coding
40.6163	-0.372932	0.363584	-1.02571	0.305029	NA	Cx3cr1WT-Cx3cr1KO	chr14	122181633	122181843	+	1000	promoter-TSS (NM_029556)	promoter-TSS (NM_029556)	44	NM_029556	69634	Mm.34608	NM_029556	ENSMUSG00000025545	Clybl	0610033J05Rik|2310014M14Rik|AI256068|Clb	citrate lyase beta like	protein-coding
78.4447	0.186635	0.348915	0.534901	0.592718	0.958203	Cx3cr1WT-Cx3cr1KO	chr6	5256036	5256296	+	1000	promoter-TSS (NM_173006)	promoter-TSS (NM_173006)	67	NM_173006	269823	Mm.9122	NM_173006	ENSMUSG00000029759	Pon3	2810004E20|AI786302	paraoxonase 3	protein-coding
33.003	-0.203725	0.35946	-0.566753	0.570882	NA	Cx3cr1WT-Cx3cr1KO	chr11	61494076	61494341	+	1000	promoter-TSS (NM_001291035)	promoter-TSS (NM_001291035)	53	NM_001361989	23939	Mm.38172	NM_011841	ENSMUSG00000001034	Mapk7	BMK-1|BMK1|ERK-5|ERK5|Erk5-T|PRKM7|b2b2346Clo	mitogen-activated protein kinase 7	protein-coding
70.8786	0.171902	0.35521	0.483945	0.628425	0.965167	Cx3cr1WT-Cx3cr1KO	chr12	32819908	32820109	+	1000	promoter-TSS (NM_021524)	promoter-TSS (NM_021524)	-327	NM_021524	59027	Mm.202727	NM_021524	ENSMUSG00000020572	Nampt	1110035O14Rik|AI314458|AI480535|NAmPRTase|Pbef|Pbef1|Visfatin	nicotinamide phosphoribosyltransferase	protein-coding
41.4599	-0.0412627	0.363363	-0.113558	0.909589	NA	Cx3cr1WT-Cx3cr1KO	chr14	55660308	55660576	+	1000	promoter-TSS (NR_028316)	promoter-TSS (NR_028316)	66	NM_023397	67881	Mm.24601	NM_023397	ENSMUSG00000002329	Mdp1	1810034K20Rik|AI035604	magnesium-dependent phosphatase 1	protein-coding
33.1711	-0.0915377	0.361931	-0.252915	0.800334	NA	Cx3cr1WT-Cx3cr1KO	chr14	73552693	73552930	+	1000	promoter-TSS (NM_001361638)	promoter-TSS (NM_001361638)	25	NM_001361638	20916	Mm.38951	NM_011506	ENSMUSG00000022110	Sucla2	4930547K18Rik|A-SCS|SCS-betaA	succinate-Coenzyme A ligase, ADP-forming, beta subunit	protein-coding
120.972	-0.57452	0.316791	-1.81356	0.0697454	0.626251	Cx3cr1WT-Cx3cr1KO	chr2	120463480	120463758	+	1000	promoter-TSS (NM_001177799)	promoter-TSS (NM_001177799)	26	NM_007601	12335	Mm.458021	NM_007601	ENSMUSG00000079110	Capn3	AI323605|Capa-3|Capa3|Lp82|p94	calpain 3	protein-coding
270.086	0.0543251	0.247503	0.219492	0.826267	0.990948	Cx3cr1WT-Cx3cr1KO	chr10	19015229	19015458	+	1000	promoter-TSS (NM_009397)	promoter-TSS (NM_009397)	67	NM_009397	21929	Mm.116683	NM_009397	ENSMUSG00000019850	Tnfaip3	A20|Tnfip3	tumor necrosis factor, alpha-induced protein 3	protein-coding
55.2005	-0.0327181	0.362006	-0.0903799	0.927985	0.994985	Cx3cr1WT-Cx3cr1KO	chr12	87387245	87387540	+	1000	intron (NM_011479, intron 1 of 11)	intron (NM_011479, intron 1 of 11)	963	NM_011479	20773	Mm.565	NM_011479	ENSMUSG00000021036	Sptlc2	LCB2|LCB2a|Spt2	serine palmitoyltransferase, long chain base subunit 2	protein-coding
51.6543	0.22108	0.361874	0.610932	0.541245	0.948428	Cx3cr1WT-Cx3cr1KO	chr12	24498513	24498793	+	1000	promoter-TSS (NR_028341)	promoter-TSS (NR_028341)	72	NR_028341	21340	Mm.39082	NM_020614	ENSMUSG00000059669	Taf1b	4930408G01Rik|A230108M10Rik|TAFI68|Tafi86|p63	TATA-box binding protein associated factor, RNA polymerase I, B	protein-coding
140.851	0.534156	0.301446	1.77198	0.0763985	0.645104	Cx3cr1WT-Cx3cr1KO	chr1	134560091	134560301	+	1000	promoter-TSS (NM_152895)	promoter-TSS (NM_152895)	18	NM_152895	75605	Mm.28995	NM_152895	ENSMUSG00000042207	Kdm5b	2010009J12Rik|2210016I17Rik|AW556288|D1Ertd202e|Jarid1b|PLU-1|PUT1|Plu1|RBBP2H1A|Rb-Bp2|mKIAA4034	lysine (K)-specific demethylase 5B	protein-coding
533.113	0.188821	0.18291	1.03232	0.301923	0.892713	Cx3cr1WT-Cx3cr1KO	chr1	161035095	161035326	+	1000	promoter-TSS (NR_151478)	promoter-TSS (NR_151478)	294	NR_153812	14455	Mm.270065	NR_002840	ENSMUSG00000053332	Gas5	Gas-5|Mir5117|Snhg2	growth arrest specific 5	ncRNA
24.2777	-0.934429	0.349733	-2.67184	0.0075437	NA	Cx3cr1WT-Cx3cr1KO	chr2	166906917	166907136	+	1000	intron (NM_023565, intron 1 of 24)	intron (NM_023565, intron 1 of 24)	930	NM_023565	110750	Mm.22417	NM_023565	ENSMUSG00000002718	Cse1l	2610100P18Rik|AA407533|Capts|Cas|Xpo2	chromosome segregation 1-like (S. cerevisiae)	protein-coding
103.666	0.750308	0.336442	2.23012	0.0257393	0.473343	Cx3cr1WT-Cx3cr1KO	chr1	46852766	46853032	+	1000	intron (NM_001356416, intron 1 of 10)	CpG	719	NM_001356416	227059	Mm.233889	NM_172653	ENSMUSG00000025986	Slc39a10	2900042E17Rik|5430433I10|Zip10|mKIAA1265	solute carrier family 39 (zinc transporter), member 10	protein-coding
260.823	-0.29853	0.249718	-1.19547	0.231903	0.857244	Cx3cr1WT-Cx3cr1KO	chr10	80148200	80148407	+	1000	promoter-TSS (NM_021565)	promoter-TSS (NM_021565)	31	NM_001347117	59090	Mm.143813	NM_021565	ENSMUSG00000035621	Midn	3000003C15Rik	midnolin	protein-coding
138.76	-0.0105522	0.317086	-0.0332786	0.973452	0.998197	Cx3cr1WT-Cx3cr1KO	chr7	66109351	66109590	+	1000	promoter-TSS (NM_001081163)	promoter-TSS (NM_001081163)	-45	NM_001081163	269941	Mm.333916	NM_001081163	ENSMUSG00000032640	Chsy1	mKIAA0990	chondroitin sulfate synthase 1	protein-coding
86.8836	-0.0175626	0.350918	-0.0500476	0.960084	0.998197	Cx3cr1WT-Cx3cr1KO	chr16	17276221	17276506	+	1000	promoter-TSS (NM_177473)	promoter-TSS (NM_177473)	63	NM_177473	224019	Mm.246388	NM_177473	ENSMUSG00000055692	Tmem191c	4933405M22Rik|D16Bwg1494e|MNCb-4137	transmembrane protein 191C	protein-coding
77.9914	0.166948	0.230095	0.725561	0.468108	0.931076	Cx3cr1WT-Cx3cr1KO	chr8	119344434	119344641	+	1000	promoter-TSS (NM_024219)	promoter-TSS (NM_024219)	-1	NM_024219	68196	Mm.358714	NM_024219	ENSMUSG00000031839	Hsbp1	0610007A03Rik|AA408769|Hsp25	heat shock factor binding protein 1	protein-coding
35.3328	-0.0293788	0.360797	-0.0814276	0.935102	NA	Cx3cr1WT-Cx3cr1KO	chr19	38819060	38819394	+	1000	promoter-TSS (NM_021315)	promoter-TSS (NM_021315)	10	NM_021315	57753	Mm.86482	NM_021315	ENSMUSG00000024999	Noc3l	AF233884|Fad24	NOC3 like DNA replication regulator	protein-coding
113.869	-0.233056	0.327803	-0.710964	0.477107	0.931076	Cx3cr1WT-Cx3cr1KO	chr17	30004479	30004713	+	1000	promoter-TSS (NM_148926)	promoter-TSS (NM_148926)	-443	NM_148926	21769	Mm.220972	NM_148926	ENSMUSG00000044477	Zfand3	AW539211|TEG-27|Tex27	zinc finger, AN1-type domain 3	protein-coding
329.948	-0.0480485	0.25458	-0.188736	0.8503	0.993188	Cx3cr1WT-Cx3cr1KO	chr13	59769890	59770191	+	1000	promoter-TSS (NR_015349)	promoter-TSS (NR_015349)	74	NR_015349	13996	Mm.490435	NR_015349		Etohd2	AW491659	ethanol decreased 2	ncRNA
88.9173	0.317145	0.338794	0.9361	0.349222	0.902562	Cx3cr1WT-Cx3cr1KO	chr5	136135817	136136064	+	1000	promoter-TSS (NM_001347492)	promoter-TSS (NM_001347492)	134	NM_027891	71735	Mm.425292	NM_027891	ENSMUSG00000029703	Lrwd1	1200011O22Rik|AU042569|AW548074|Orca	leucine-rich repeats and WD repeat domain containing 1	protein-coding
149.48	0.674304	0.304778	2.21244	0.0269364	0.480051	Cx3cr1WT-Cx3cr1KO	chr14	20707454	20707697	+	1000	promoter-TSS (NM_001252081)	promoter-TSS (NM_001252081)	23	NM_001252082	268721	Mm.275082	NM_027996	ENSMUSG00000021819	Zswim8	2310021P13Rik|4832404P21Rik|Kiaa0913|mKIAA0913	zinc finger SWIM-type containing 8	protein-coding
494.174	-0.169797	0.199376	-0.851642	0.394413	0.914739	Cx3cr1WT-Cx3cr1KO	chr10	128493704	128493934	+	1000	promoter-TSS (NM_010860)	promoter-TSS (NM_010860)	67	NM_001317218	17904	Mm.337074	NM_010860	ENSMUSG00000090841	Myl6	ESMLC|LC17|LC17-GI|MLC-3|MLC1SM|Myln	myosin, light polypeptide 6, alkali, smooth muscle and non-muscle	protein-coding
86.1005	0.768029	0.359952	2.1337	0.0328673	0.504891	Cx3cr1WT-Cx3cr1KO	chr7	24507389	24507674	+	1000	intron (NR_110958, intron 1 of 2)	CpG	444	NR_110958	232969	Mm.181332	NM_146183	ENSMUSG00000064264	Zfp428	2410005H09Rik|AV271806|AW047854|Znf428	zinc finger protein 428	protein-coding
68.2566	-0.416559	0.35235	-1.18223	0.237114	0.85955	Cx3cr1WT-Cx3cr1KO	chr15	102246888	102247238	+	1000	promoter-TSS (NM_001042727)	promoter-TSS (NM_001042727)	-563	NM_001042727	19411	Mm.1273	NM_011244	ENSMUSG00000001288	Rarg	Nr1b3|RAR-gamma|RARD|RARgamma2	retinoic acid receptor, gamma	protein-coding
77.6708	-0.113116	0.350875	-0.322384	0.747162	0.982604	Cx3cr1WT-Cx3cr1KO	chr11	32533926	32534195	+	1000	intron (NM_009288, intron 1 of 18)	intron (NM_009288, intron 1 of 18)	794	NM_001359177	20868	Mm.8235	NM_009288	ENSMUSG00000020272	Stk10	Gek1|Lok|mKIAA4026	serine/threonine kinase 10	protein-coding
65.5919	0.118879	0.357164	0.332843	0.739253	0.98239	Cx3cr1WT-Cx3cr1KO	chr11	82908211	82908477	+	1000	promoter-TSS (NM_145431)	promoter-TSS (NM_145431)	51	NM_145431	217011	Mm.29176	NM_145431	ENSMUSG00000020692	Nle1	AL022765|BC018399|Nle|l11Jus1|l11Jus4	notchless homolog 1	protein-coding
217.413	-0.240908	0.292089	-0.824777	0.409498	0.915358	Cx3cr1WT-Cx3cr1KO	chr6	136941477	136941775	+	1000	promoter-TSS (NM_001301305)	promoter-TSS (NM_001301305)	-123	NM_001301305	11857	Mm.2241	NM_007486	ENSMUSG00000030220	Arhgdib	D4|Gdid4|Ly-GDI	Rho, GDP dissociation inhibitor (GDI) beta	protein-coding
524.408	0.101827	0.190639	0.534135	0.593248	0.958203	Cx3cr1WT-Cx3cr1KO	chr4	117155956	117156275	+	1000	promoter-TSS (NM_009098)	promoter-TSS (NM_009098)	17	NM_009098	20116	Mm.260904	NM_009098	ENSMUSG00000047675	Rps8	-	ribosomal protein S8	protein-coding
85.311	-0.0354243	0.345443	-0.102547	0.918322	0.994132	Cx3cr1WT-Cx3cr1KO	chr11	120672773	120673010	+	1000	promoter-TSS (NM_026877)	promoter-TSS (NM_026877)	-82	NM_026877	68938	Mm.294020	NM_026877	ENSMUSG00000025142	Aspscr1	1190006K01Rik|ASPC|ASPCR1|ASPL|ASPS|RCC17|TUG	alveolar soft part sarcoma chromosome region, candidate 1 (human)	protein-coding
58.8969	0.00179906	0.355818	0.00505613	0.995966	0.999755	Cx3cr1WT-Cx3cr1KO	chr13	38204847	38205130	+	1000	promoter-TSS (NM_026382)	promoter-TSS (NM_026382)	49	NM_026382	67797	Mm.250783	NM_026382	ENSMUSG00000021431	Snrnp48	1110050F08Rik|6530403A03Rik|C6orf151	small nuclear ribonucleoprotein 48 (U11/U12)	protein-coding
80.2778	-0.218209	0.348401	-0.626316	0.531108	0.947185	Cx3cr1WT-Cx3cr1KO	chr14	56668189	56668403	+	1000	promoter-TSS (NM_023773)	promoter-TSS (NM_023773)	48	NM_023773	75339	Mm.152466	NM_023773	ENSMUSG00000079184	Mphosph8	1500035L22Rik|4930548G07Rik|AU040635	M-phase phosphoprotein 8	protein-coding
99.9696	-0.0726608	0.337871	-0.215055	0.829725	0.991394	Cx3cr1WT-Cx3cr1KO	chr16	16870765	16871051	+	1000	5' UTR (NM_011624, exon 1 of 18)	5' UTR (NM_011624, exon 1 of 18)	172	NM_011624	21976	Mm.326089	NM_011624	ENSMUSG00000022779	Top3b	-	topoisomerase (DNA) III beta	protein-coding
108.892	-0.151786	0.353239	-0.429697	0.667416	0.974674	Cx3cr1WT-Cx3cr1KO	chr5	64969827	64970063	+	1000	promoter-TSS (NM_026667)	promoter-TSS (NM_026667)	-130	NM_026667	68303	Mm.258545	NM_026667	ENSMUSG00000029185	Fam114a1	1190001N04Rik|9130005N14Rik|Noxp20	family with sequence similarity 114, member A1	protein-coding
223.978	0.371711	0.285222	1.30323	0.192496	0.829282	Cx3cr1WT-Cx3cr1KO	chr14	75845258	75845476	+	1000	promoter-TSS (NR_045294)	promoter-TSS (NR_045294)	111	NM_009429	22070	Mm.297482	NM_009429	ENSMUSG00000060126	Tpt1	TCTP|Trt|p21|p23	tumor protein, translationally-controlled 1	protein-coding
224.697	-0.51448	0.268716	-1.91459	0.0555452	0.585509	Cx3cr1WT-Cx3cr1KO	chr6	120363924	120364132	+	1000	promoter-TSS (NM_145997)	promoter-TSS (NM_145997)	-71	NM_145997	214899	Mm.404761	NM_145997	ENSMUSG00000030180	Kdm5a	AA409370|C76986|Jarid1a|RBP2|Rbbp2	lysine (K)-specific demethylase 5A	protein-coding
217.087	0.078193	0.282979	0.276321	0.782302	0.986928	Cx3cr1WT-Cx3cr1KO	chr4	115737717	115737940	+	1000	promoter-TSS (NM_172698)	promoter-TSS (NM_172698)	-245	NM_172698	230648	Mm.283565	NM_172698	ENSMUSG00000034210	Efcab14	4732418C07Rik	EF-hand calcium binding domain 14	protein-coding
178.27	-0.0380498	0.281064	-0.135377	0.892313	0.993944	Cx3cr1WT-Cx3cr1KO	chr2	118544456	118544689	+	1000	promoter-TSS (NR_138603)	promoter-TSS (NR_138603)	15	NR_138603	171543	Mm.210125	NM_138313	ENSMUSG00000040093	Bmf	AW260063|AW411872	BCL2 modifying factor	protein-coding
173.826	0.0620883	0.300393	0.20669	0.836252	0.991565	Cx3cr1WT-Cx3cr1KO	chr18	60560580	60560896	+	1000	promoter-TSS (NM_025776)	promoter-TSS (NM_025776)	-48	NM_025776	66810	Mm.275106	NM_025776	ENSMUSG00000024604	Rbm22	8430430L24Rik	RNA binding motif protein 22	protein-coding
33.9518	-0.481909	0.361942	-1.33145	0.18304	NA	Cx3cr1WT-Cx3cr1KO	chr16	23609674	23609893	+	1000	promoter-TSS (NM_023386)	promoter-TSS (NM_023386)	-136	NM_023386	67775	Mm.475107	NM_023386	ENSMUSG00000033355	Rtp4	5830458K16Rik|Ifrg28	receptor transporter protein 4	protein-coding
263.589	-0.0497648	0.247625	-0.200969	0.840723	0.992388	Cx3cr1WT-Cx3cr1KO	chr11	55460993	55461212	+	1000	5' UTR (NM_009720, exon 1 of 4)	5' UTR (NM_009720, exon 1 of 4)	106	NM_009720	11927	Mm.217759	NM_009720	ENSMUSG00000018585	Atox1	AI256639|Atx1	antioxidant 1 copper chaperone	protein-coding
75.068	0.432731	0.352832	1.22645	0.220029	0.854106	Cx3cr1WT-Cx3cr1KO	chr16	56717179	56717514	+	1000	5' UTR (NM_001252443, exon 1 of 7)	5' UTR (NM_001252443, exon 1 of 7)	104	NM_001357124	21787	Mm.425970	NM_019678	ENSMUSG00000022757	Tfg	AI173908	Trk-fused gene	protein-coding
96.2376	0.174908	0.334055	0.52359	0.600564	0.958557	Cx3cr1WT-Cx3cr1KO	chr17	45595371	45595625	+	1000	promoter-TSS (NM_001199116)	promoter-TSS (NM_001199116)	74	NM_001199116	63959	Mm.29744	NM_022880	ENSMUSG00000023942	Slc29a1	1200014D21Rik|AA407560|ENT1	solute carrier family 29 (nucleoside transporters), member 1	protein-coding
66.5706	0.334111	0.357402	0.934832	0.349875	0.902562	Cx3cr1WT-Cx3cr1KO	chr5	117319027	117319340	+	1000	promoter-TSS (NM_001033311)	promoter-TSS (NM_001033311)	-83	NM_001033311	231668	Mm.298603	NM_001033311	ENSMUSG00000066894	Vsig10	-	V-set and immunoglobulin domain containing 10	protein-coding
132.713	0.912052	0.316973	2.87738	0.00400994	0.254202	Cx3cr1WT-Cx3cr1KO	chr18	38418897	38419106	+	1000	promoter-TSS (NM_022996)	promoter-TSS (NM_022996)	94	NM_001355749	65113	Mm.102496	NM_022996	ENSMUSG00000024425	Ndfip1	0610010M22Rik|N4wbp5	Nedd4 family interacting protein 1	protein-coding
160.387	0.0917727	0.293591	0.312587	0.754595	0.983463	Cx3cr1WT-Cx3cr1KO	chr1	165461167	165461379	+	1000	promoter-TSS (NM_027430)	promoter-TSS (NM_027430)	65	NM_027430	70456	Mm.195625	NM_027430	ENSMUSG00000026568	Mpc2	0610006C01Rik|2010002I07Rik|2610205H19Rik|AA108335|Brp44|ESTM43	mitochondrial pyruvate carrier 2	protein-coding
158.05	-0.0853516	0.302287	-0.282353	0.777673	0.986175	Cx3cr1WT-Cx3cr1KO	chr1	36557494	36557848	+	1000	promoter-TSS (NM_001304330)	promoter-TSS (NM_001304330)	-114	NM_001304329	20353	Mm.29558	NM_001126047	ENSMUSG00000026121	Sema4c	AI426163|M-Sema F|Semacl1|Semaf|Semai|sema I	sema domain, immunoglobulin domain (Ig), transmembrane domain (TM) and short cytoplasmic domain, (semaphorin) 4C	protein-coding
245.173	-0.155815	0.265815	-0.586179	0.557755	0.952473	Cx3cr1WT-Cx3cr1KO	chr5	31220692	31220917	+	1000	promoter-TSS (NM_008014)	promoter-TSS (NM_008014)	-259	NM_008014	14208	Mm.14501	NM_008014	ENSMUSG00000029147	Ppm1g	AI385652|Fin13	protein phosphatase 1G (formerly 2C), magnesium-dependent, gamma isoform	protein-coding
322.813	0.276612	0.229626	1.20462	0.228351	0.854106	Cx3cr1WT-Cx3cr1KO	chr10	75517136	75517376	+	1000	promoter-TSS (NM_026095)	promoter-TSS (NM_026095)	125	NM_175133	68778	Mm.29382	NM_175133	ENSMUSG00000033416	Gucd1	1110038D17Rik	guanylyl cyclase domain containing 1	protein-coding
401.572	-0.221213	0.242426	-0.912496	0.361508	0.906145	Cx3cr1WT-Cx3cr1KO	chr6	54817493	54817740	+	1000	intron (NM_199143, intron 1 of 4)	intron (NM_199143, intron 1 of 4)	700	NM_199143	387524	Mm.286149	NM_199143	ENSMUSG00000058446	Znrf2	1190002C14Rik|AU044205|D6Ertd365e	zinc and ring finger 2	protein-coding
130.433	0.0745443	0.312234	0.238745	0.811303	0.98788	Cx3cr1WT-Cx3cr1KO	chr7	100863092	100863565	+	1000	promoter-TSS (NM_177073)	promoter-TSS (NM_177073)	85	NM_001358914	320100	Mm.40336	NM_177073	ENSMUSG00000008318	Relt	E430021K24Rik|Tnfrsf19l	RELT tumor necrosis factor receptor	protein-coding
204.337	-0.226634	0.266036	-0.851893	0.394273	0.914739	Cx3cr1WT-Cx3cr1KO	chr1	86526072	86526322	+	1000	promoter-TSS (NM_001360831)	promoter-TSS (NM_001360831)	-360	NR_153834	19231	Mm.19187	NM_008972	ENSMUSG00000026238	Ptma	Thym	prothymosin alpha	protein-coding
96.0763	-0.560468	0.333962	-1.67824	0.0933004	0.684735	Cx3cr1WT-Cx3cr1KO	chr7	99381120	99381321	+	1000	promoter-TSS (NM_001362166)	promoter-TSS (NM_001362166)	-298	NM_001362168	233552	Mm.286317	NM_201352	ENSMUSG00000035314	Gdpd5	BC024955|Gde2	glycerophosphodiester phosphodiesterase domain containing 5	protein-coding
47.8468	0.327644	0.36123	0.907024	0.364394	0.906712	Cx3cr1WT-Cx3cr1KO	chr6	148831441	148831656	+	1000	promoter-TSS (NM_001081113)	promoter-TSS (NM_001081113)	-81	NM_001081113	320727	Mm.260105	NM_001081113	ENSMUSG00000040029	Ipo8	6230418K12Rik|Abcc10|C130009K11Rik|MRP7|OM-1|Om1|Ranbp8	importin 8	protein-coding
267.745	-0.136848	0.289587	-0.472562	0.636526	0.966928	Cx3cr1WT-Cx3cr1KO	chr6	38354207	38354576	+	1000	5' UTR (NM_001347122, exon 1 of 13)	5' UTR (NM_001347122, exon 1 of 13)	212	NM_001347122	78781	Mm.25243	NM_028421	ENSMUSG00000029826	Zc3hav1	1200014N16Rik|2900058M19Rik|9130009D18Rik|9830115L13Rik|ARTD13|D6Bwg1452e|ZAP	zinc finger CCCH type, antiviral 1	protein-coding
158.267	-0.326542	0.327936	-0.995751	0.319371	0.898815	Cx3cr1WT-Cx3cr1KO	chr9	59750496	59750704	+	1000	promoter-TSS (NM_001172071)	promoter-TSS (NM_001172071)	49	NM_001172069	71599	Mm.279070	NM_027838	ENSMUSG00000051705	Senp8	9130010J17Rik|AU020827|Den1|Nedp1|Prsc2	SUMO/sentrin specific peptidase 8	protein-coding
150.936	0.244517	0.299984	0.8151	0.415015	0.916121	Cx3cr1WT-Cx3cr1KO	chrX	99136031	99136300	+	1000	5' UTR (NM_010110, exon 1 of 5)	5' UTR (NM_010110, exon 1 of 5)	104	NM_010110	13641	Mm.3374	NM_010110	ENSMUSG00000031217	Efnb1	Cek5-L|EFL-3|Elk-L|Epl2|Eplg2|LERK-2|Lerk2|Stra1	ephrin B1	protein-coding
182.92	0.0348092	0.323688	0.10754	0.914361	0.993944	Cx3cr1WT-Cx3cr1KO	chr6	117917003	117917241	+	1000	promoter-TSS (NM_001166427)	promoter-TSS (NM_001166427)	-172	NM_001166427	98758	Mm.422979	NM_133834	ENSMUSG00000042079	Hnrnpf	4833420I20Rik|AA407306|Hnrpf	heterogeneous nuclear ribonucleoprotein F	protein-coding
106.657	1.23075	0.345635	3.56083	0.00036969	0.0914057	Cx3cr1WT-Cx3cr1KO	chr19	10304803	10305045	+	1000	promoter-TSS (NM_198114)	promoter-TSS (NM_198114)	-47	NM_198114	269060	Mm.329718	NM_198114	ENSMUSG00000035735	Dagla	Nsddr	diacylglycerol lipase, alpha	protein-coding
184.195	0.478297	0.275295	1.7374	0.0823165	0.655764	Cx3cr1WT-Cx3cr1KO	chr8	94098519	94098719	+	1000	5' UTR (NM_026116, exon 1 of 17)	5' UTR (NM_026116, exon 1 of 17)	192	NM_026116	67378	Mm.292107	NM_026116	ENSMUSG00000031755	Bbs2	2410125H22Rik|AI447581	Bardet-Biedl syndrome 2 (human)	protein-coding
172.448	-0.0160663	0.290007	-0.0553998	0.95582	0.998197	Cx3cr1WT-Cx3cr1KO	chr13	54565209	54565444	+	1000	promoter-TSS (NM_001252648)	promoter-TSS (NM_001252648)	56	NM_001252647	97820	Mm.24593	NM_133797	ENSMUSG00000025871	4833439L19Rik	4930558H15Rik|C81457|Kiaa1191|P33monox	RIKEN cDNA 4833439L19 gene	protein-coding
153.002	0.273045	0.330081	0.827205	0.408121	0.914739	Cx3cr1WT-Cx3cr1KO	chr19	7217402	7217686	+	1000	promoter-TSS (NM_007750)	promoter-TSS (NM_007750)	72	NM_007750	12868	Mm.14022	NM_007750	ENSMUSG00000035885	Cox8a	COX8L	cytochrome c oxidase subunit VIIIa	protein-coding
188.028	0.894182	0.310263	2.88201	0.00395142	0.254202	Cx3cr1WT-Cx3cr1KO	chr19	32757515	32757752	+	1000	promoter-TSS (NM_008960)	promoter-TSS (NM_008960)	56	NM_008960	19211	Mm.245395	NM_008960	ENSMUSG00000013663	Pten	2310035O07Rik|A130070J02Rik|AI463227|B430203M17Rik|MMAC1|PTENbeta|TEP1	phosphatase and tensin homolog	protein-coding
105.492	-0.254532	0.321389	-0.791975	0.428375	0.920791	Cx3cr1WT-Cx3cr1KO	chr10	120226968	120227244	+	1000	promoter-TSS (NM_025431)	promoter-TSS (NM_025431)	46	NM_025431	66225	Mm.291755	NM_025431	ENSMUSG00000020224	Llph	1190005P17Rik	LLP homolog, long-term synaptic facilitation (Aplysia)	protein-coding
181.823	0.0974855	0.279069	0.349324	0.726846	0.981655	Cx3cr1WT-Cx3cr1KO	chr11	76217382	76217620	+	1000	promoter-TSS (NM_177367)	promoter-TSS (NM_177367)	71	NM_177367	276919	Mm.482713	NM_177367	ENSMUSG00000049396	Gemin4	4932415L08Rik|AU015359	gem nuclear organelle associated protein 4	protein-coding
79.2412	0.134603	0.342946	0.392492	0.694695	0.977603	Cx3cr1WT-Cx3cr1KO	chr3	100488306	100488559	+	1000	intron (NM_001142952, intron 1 of 1)	CpG	760	NM_001142952	74645	Mm.226900	NM_001142952	ENSMUSG00000044468	Fam46c	4930431B09Rik|AI449797	family with sequence similarity 46, member C	protein-coding
132.251	0.477411	0.303729	1.57183	0.11599	0.728043	Cx3cr1WT-Cx3cr1KO	chr15	98763067	98763292	+	1000	promoter-TSS (NM_007478)	promoter-TSS (NM_007478)	-61	NM_007478	11842	Mm.221298	NM_007478	ENSMUSG00000051853	Arf3	5430400P17Rik|AI854770	ADP-ribosylation factor 3	protein-coding
55.4176	-0.155229	0.363497	-0.427045	0.669347	0.9758	Cx3cr1WT-Cx3cr1KO	chr10	81350244	81350545	+	1000	promoter-TSS (NM_010440)	promoter-TSS (NM_010440)	32	NM_001163165	15353	Mm.38474	NM_010440	ENSMUSG00000020232	Hmg20b	AW610687|BRAF35|Hmgx2|Hmgxb2|Smarce1r	high mobility group 20B	protein-coding
146.655	0.322482	0.302708	1.06532	0.28673	0.885562	Cx3cr1WT-Cx3cr1KO	chr1	165460497	165460753	+	1000	promoter-TSS (NM_027430)	promoter-TSS (NM_027430)	-162	NM_028759	74106	Mm.227605	NM_028759	ENSMUSG00000026571	Dcaf6	1200006M05Rik|Iqwd1|PC326	DDB1 and CUL4 associated factor 6	protein-coding
48.5042	1.08282	0.361369	2.99644	0.0027315	0.209235	Cx3cr1WT-Cx3cr1KO	chr2	167688897	167689131	+	1000	promoter-TSS (NM_009883)	promoter-TSS (NM_009883)	99	NM_001287738	12608	Mm.439656	NM_009883	ENSMUSG00000056501	Cebpb	C/EBPbeta|CRP2|IL-6DBP|LAP|LIP|NF-IL6|NF-M|Nfil6	CCAAT/enhancer binding protein (C/EBP), beta	protein-coding
178.975	0.0909956	0.312851	0.29086	0.771159	0.984237	Cx3cr1WT-Cx3cr1KO	chr17	33555668	33555913	+	1000	promoter-TSS (NM_053214)	promoter-TSS (NM_053214)	83	NM_053214	17916	Mm.42019	NM_053214	ENSMUSG00000024300	Myo1f	C330006B10Rik	myosin IF	protein-coding
50.4457	-0.112481	0.363328	-0.309587	0.756875	0.983463	Cx3cr1WT-Cx3cr1KO	chrX	108834566	108834782	+	1000	promoter-TSS (NM_001081477)	promoter-TSS (NM_001081477)	196	NR_015493	69964	Mm.160066	NR_015493	ENSMUSG00000086629	2810403D21Rik	1810022M18Rik|4632410B05Rik|AU017716	RIKEN cDNA 2810403D21 gene	ncRNA
97.1446	0.0832968	0.331913	0.25096	0.801845	0.98788	Cx3cr1WT-Cx3cr1KO	chr17	6948406	6948816	+	1000	promoter-TSS (NM_001083945)	promoter-TSS (NM_001083945)	-255	NM_001083945	100037282	Mm.29830	NM_001083945	ENSMUSG00000023806	Rsph3b	Rshl2b	radial spoke 3B homolog (Chlamydomonas)	protein-coding
109.807	0.543273	0.325232	1.67042	0.0948373	0.686834	Cx3cr1WT-Cx3cr1KO	chr9	57589453	57589656	+	1000	TTS (NM_022813)	TTS (NM_022813)	102	NM_027895	71742	Mm.155877	NM_027895	ENSMUSG00000032308	Ulk3	1200015E14Rik	unc-51-like kinase 3	protein-coding
249.041	-0.377462	0.265388	-1.4223	0.154938	0.788083	Cx3cr1WT-Cx3cr1KO	chr11	22990342	22990727	+	1000	promoter-TSS (NM_009837)	promoter-TSS (NM_009837)	-59	NM_009837	12464	Mm.296985	NM_009837	ENSMUSG00000007739	Cct4	2610204B21Rik|A45|C78323|Cctd	chaperonin containing Tcp1, subunit 4 (delta)	protein-coding
71.6311	0.651572	0.345932	1.88353	0.0596287	0.600207	Cx3cr1WT-Cx3cr1KO	chr12	85598670	85598933	+	1000	promoter-TSS (NM_030887)	promoter-TSS (NM_030887)	-304	NM_001205052	81703	Mm.103560	NM_030887	ENSMUSG00000034271	Jdp2	Jundm2|Jundp2|TIF	Jun dimerization protein 2	protein-coding
135.357	-0.387574	0.309876	-1.25074	0.211029	0.84677	Cx3cr1WT-Cx3cr1KO	chr9	121383075	121383383	+	1000	intron (NM_001357970, intron 1 of 15)	intron (NM_001357970, intron 1 of 15)	435	NM_001357969	67095	Mm.491112	NM_175114	ENSMUSG00000032536	Trak1	2310001H13Rik|AI413908|AI467545|hyrt|mKIAA1042	trafficking protein, kinesin binding 1	protein-coding
30.2591	-0.220292	0.361216	-0.609861	0.541954	NA	Cx3cr1WT-Cx3cr1KO	chr17	86166697	86166980	+	1000	promoter-TSS (NM_011104)	promoter-TSS (NM_011104)	-947	NM_011104	18754	Mm.24614	NM_011104	ENSMUSG00000045038	Prkce	5830406C15Rik|PKC[e]|PKCepsilon|Pkce|R75156	protein kinase C, epsilon	protein-coding
127.745	0.362739	0.308363	1.17634	0.239461	0.859725	Cx3cr1WT-Cx3cr1KO	chr19	3686639	3686877	+	1000	promoter-TSS (NM_008513)	promoter-TSS (NM_008513)	-194	NM_008513	16973	Mm.274581	NM_008513	ENSMUSG00000024913	Lrp5	BMND1|HBM|LR3|LRP7|OPPG|mKIAA4142	low density lipoprotein receptor-related protein 5	protein-coding
33.3879	-0.157449	0.361836	-0.435138	0.663462	NA	Cx3cr1WT-Cx3cr1KO	chr16	4560109	4560340	+	1000	promoter-TSS (NM_031182)	promoter-TSS (NM_031182)	-504	NM_031182	83383	Mm.273210	NM_031182	ENSMUSG00000005718	Tfap4	AI642933|AP-4|D930048N17Rik|Tcfap4|bHLHc41	transcription factor AP4	protein-coding
37.7583	0.829218	0.362355	2.28841	0.0221134	NA	Cx3cr1WT-Cx3cr1KO	chr10	36974469	36974687	+	1000	promoter-TSS (NM_008229)	promoter-TSS (NM_008229)	34	NM_008229	15182	Mm.19806	NM_008229	ENSMUSG00000019777	Hdac2	D10Wsu179e|YAF1|Yy1bp|mRPD3	histone deacetylase 2	protein-coding
264.897	0.0292528	0.263414	0.111053	0.911575	0.993944	Cx3cr1WT-Cx3cr1KO	chr14	57398348	57398608	+	1000	promoter-TSS (NM_030004)	promoter-TSS (NM_030004)	5	NM_030004	68631	Mm.25539	NM_030004	ENSMUSG00000021947	Cryl1	1110025H08Rik|A230106J09Rik|C85932|gul3dh	crystallin, lambda 1	protein-coding
200.247	-0.110877	0.279605	-0.396549	0.6917	0.977385	Cx3cr1WT-Cx3cr1KO	chr5	143732512	143732747	+	1000	promoter-TSS (NM_029749)	promoter-TSS (NM_029749)	-349	NM_029749	76800	Mm.259620	NM_029749	ENSMUSG00000051306	Usp42	2410140K03Rik|3110031A07Rik|A630018G05Rik|D5Ertd591e	ubiquitin specific peptidase 42	protein-coding
236.245	-0.200071	0.268484	-0.745187	0.456159	0.931024	Cx3cr1WT-Cx3cr1KO	chr18	53176293	53176522	+	1000	exon (NM_026386, exon 1 of 15)	exon (NM_026386, exon 1 of 15)	115	NM_026386	67804	Mm.252171	NM_026386	ENSMUSG00000034484	Snx2	0610030A03Rik	sorting nexin 2	protein-coding
365.699	-0.510853	0.233439	-2.18837	0.0286424	0.480051	Cx3cr1WT-Cx3cr1KO	chr11	115001479	115001721	+	1000	5' UTR (NM_134158, exon 1 of 4)	5' UTR (NM_134158, exon 1 of 4)	280	NM_134158	140497	Mm.2699	NM_134158	ENSMUSG00000044811	Cd300c2	CLM4|Cd300c|Cd300d|DIgR1|Igsf7|Lmir2|MAIR-II	CD300C molecule 2	protein-coding
46.9928	0.378917	0.362299	1.04587	0.295622	0.888424	Cx3cr1WT-Cx3cr1KO	chr14	72710487	72710789	+	1000	promoter-TSS (NM_207636)	promoter-TSS (NM_207636)	-635	NM_207636	319448	Mm.205421	NM_207636	ENSMUSG00000033487	Fndc3a	1700094E19Rik|D14Ertd453e|F730017H24Rik|Fndc3|sys	fibronectin type III domain containing 3A	protein-coding
86.5538	0.417017	0.337053	1.23724	0.215997	0.854106	Cx3cr1WT-Cx3cr1KO	chr10	57532238	57532540	+	1000	exon (NM_019760, exon 1 of 9)	exon (NM_019760, exon 1 of 9)	140	NM_019760	56442	Mm.29344	NM_019760	ENSMUSG00000019877	Serinc1	1500011D18Rik|AI315070|AIGP-2|TMS-2|Tde1l|Tde2|Tms2|mKIAA1253	serine incorporator 1	protein-coding
121.176	0.0259461	0.3217	0.0806529	0.935718	0.995804	Cx3cr1WT-Cx3cr1KO	chr14	50807846	50808117	+	1000	promoter-TSS (NR_002142)	promoter-TSS (NR_002142)	65	NM_009632	11546	Mm.281482	NM_009632	ENSMUSG00000036023	Parp2	ADPRT-2|ARTD2|Adprt2|Adprtl2|Aspartl2|C78626|PARP-2|mPARP-2|pADPRT-2	poly (ADP-ribose) polymerase family, member 2	protein-coding
200.766	0.183452	0.298734	0.6141	0.539149	0.947371	Cx3cr1WT-Cx3cr1KO	chr19	5488152	5488400	+	1000	non-coding (NR_153768, exon 1 of 16)	non-coding (NR_153768, exon 1 of 16)	103	NM_027877	71711	Mm.27697	NM_027877	ENSMUSG00000024906	Mus81	1200008A18Rik|AI182501|AW045863	MUS81 structure-specific endonuclease subunit	protein-coding
67.9279	0.788311	0.36229	2.17591	0.0295621	0.488327	Cx3cr1WT-Cx3cr1KO	chr5	142629497	142629732	+	1000	promoter-TSS (NM_178398)	promoter-TSS (NM_178398)	30	NM_178398	74781	Mm.29432	NM_178398	ENSMUSG00000029578	Wipi2	1110018O08Rik|2510001I10Rik	WD repeat domain, phosphoinositide interacting 2	protein-coding
75.0924	-0.00792746	0.344359	-0.0230209	0.981634	0.998197	Cx3cr1WT-Cx3cr1KO	chr3	84259544	84259790	+	1000	5' UTR (NM_001271727, exon 1 of 12)	5' UTR (NM_001271727, exon 1 of 12)	112	NM_001271727	80890	Mm.44876	NM_030706	ENSMUSG00000027993	Trim2	mKIAA0517|narf	tripartite motif-containing 2	protein-coding
120.1	-0.286605	0.312181	-0.918071	0.358582	0.906073	Cx3cr1WT-Cx3cr1KO	chr11	106256093	106256290	+	1000	promoter-TSS (NM_008950)	promoter-TSS (NM_008950)	6	NM_008950	19184	Mm.272361	NM_008950	ENSMUSG00000020708	Psmc5	mSUG1	protease (prosome, macropain) 26S subunit, ATPase 5	protein-coding
301.828	-0.371996	0.231965	-1.60367	0.108786	0.714959	Cx3cr1WT-Cx3cr1KO	chr8	69996642	69996861	+	1000	promoter-TSS (NM_145596)	promoter-TSS (NM_145596)	-367	NM_145596	234366	Mm.270044	NM_145596	ENSMUSG00000036180	Gatad2a	1110066C11Rik|BC031407|C80248	GATA zinc finger domain containing 2A	protein-coding
125.653	0.0490976	0.33881	0.144912	0.88478	0.993944	Cx3cr1WT-Cx3cr1KO	chr11	104441528	104441849	+	1000	intron (NM_001359634, intron 2 of 14)	GA-rich|Low_complexity|Low_complexity	603	NM_001081045	76719	Mm.136418	NM_001081045	ENSMUSG00000018412	Kansl1	1700081L11Rik|9430041J06Rik|mKIAA1267	KAT8 regulatory NSL complex subunit 1	protein-coding
66.7008	-0.471902	0.357971	-1.31827	0.187414	0.822001	Cx3cr1WT-Cx3cr1KO	chr2	45111143	45111395	+	1000	promoter-TSS (NR_110571)	promoter-TSS (NR_110571)	131	NR_110572	433424	Mm.441408	NR_110571	ENSMUSG00000052248	Zeb2os	Gm13476|Zeb2nat	zinc finger E-box binding homeobox 2, opposite strand	ncRNA
338.676	-0.276811	0.234405	-1.18091	0.237638	0.859595	Cx3cr1WT-Cx3cr1KO	chr15	79546434	79546738	+	1000	promoter-TSS (NM_199079)	promoter-TSS (NM_199079)	-27	NM_199079	67040	Mm.29644	NM_152806	ENSMUSG00000055065	Ddx17	2610007K22Rik|A430025E01Rik|AI047725|C80929|Gm926|p72	DEAD (Asp-Glu-Ala-Asp) box polypeptide 17	protein-coding
112.676	-0.374192	0.3273	-1.14327	0.252928	0.860779	Cx3cr1WT-Cx3cr1KO	chr4	156202910	156203117	+	1000	promoter-TSS (NR_030671)	promoter-TSS (NR_030671)	-271	NR_030671	100382	Mm.461024	NR_030671		AW011738	-	expressed sequence AW011738	ncRNA
182.724	-0.293075	0.282805	-1.03631	0.300056	0.892713	Cx3cr1WT-Cx3cr1KO	chr9	106170891	106171124	+	1000	promoter-TSS (NM_029896)	promoter-TSS (NM_029896)	78	NM_029896	77305	Mm.265125	NM_029896	ENSMUSG00000020257	Wdr82	9430077D24Rik|CDW5/WDR82	WD repeat domain containing 82	protein-coding
61.5611	0.153683	0.355044	0.432854	0.665121	0.974117	Cx3cr1WT-Cx3cr1KO	chr2	26911620	26911984	+	1000	intron (NM_013721, intron 3 of 7)	intron (NM_013721, intron 3 of 7)	995	NM_013721	27176	Mm.328601	NM_013721	ENSMUSG00000062647	Rpl7a	Surf3	ribosomal protein L7A	protein-coding
210.491	0.282493	0.2904	0.972771	0.330667	0.902562	Cx3cr1WT-Cx3cr1KO	chr11	84828852	84829090	+	1000	promoter-TSS (NR_046281)	promoter-TSS (NR_046281)	32	NM_177564	192970	Mm.192213	NM_177564	ENSMUSG00000034449	Dhrs11	-	dehydrogenase/reductase (SDR family) member 11	protein-coding
321.2	0.271506	0.232051	1.17003	0.241991	0.860364	Cx3cr1WT-Cx3cr1KO	chr1	121431050	121431274	+	1000	promoter-TSS (NM_001025156)	promoter-TSS (NM_001025156)	95	NM_029955	70829	Mm.25788	NM_027567	ENSMUSG00000026339	Ccdc93	4633402D15Rik|9230102M16Rik	coiled-coil domain containing 93	protein-coding
106.175	0.234504	0.336471	0.696952	0.485833	0.931493	Cx3cr1WT-Cx3cr1KO	chr18	34954193	34954421	+	1000	promoter-TSS (NM_010481)	promoter-TSS (NM_010481)	44	NM_010481	15526	Mm.209419	NM_010481	ENSMUSG00000024359	Hspa9	74kDa|Csa|Grp75|Hsc74|Hsp74|Hsp74a|Hspa9a|Mortalin|Mot-2|Mot2|Mthsp70|Pbp74	heat shock protein 9	protein-coding
82.1661	-0.0100012	0.343073	-0.0291519	0.976743	0.998197	Cx3cr1WT-Cx3cr1KO	chr5	24586569	24586906	+	1000	promoter-TSS (NM_133913)	promoter-TSS (NM_133913)	-13	NM_133913	100910	Mm.140672	NM_133913	ENSMUSG00000038181	Chpf2	2010209O12Rik|AW060945|Gm42230|mKIAA1402|mir-671	chondroitin polymerizing factor 2	protein-coding
451.332	0.276086	0.204317	1.35126	0.176612	0.814491	Cx3cr1WT-Cx3cr1KO	chr8	85026790	85027012	+	1000	promoter-TSS (NM_026760)	promoter-TSS (NM_026760)	68	NM_026760	68544	Mm.196005	NM_026760	ENSMUSG00000041203	Trir	1110002H14Rik|2310036O22Rik|AI854688	telomerase RNA component interacting RNase	protein-coding
39.9251	-0.0215292	0.363548	-0.0592196	0.952777	NA	Cx3cr1WT-Cx3cr1KO	chr5	108434187	108434444	+	1000	promoter-TSS (NM_007507)	promoter-TSS (NM_007507)	84	NR_154996	11958	Mm.136093	NM_007507	ENSMUSG00000050856	Atp5k	2610008D24Rik|Atp5i|Lfm1	ATP synthase, H+ transporting, mitochondrial F1F0 complex, subunit E	protein-coding
47.9814	-0.280355	0.362984	-0.772363	0.439899	0.926418	Cx3cr1WT-Cx3cr1KO	chr5	112355673	112355978	+	1000	exon (NM_001039228, exon 1 of 1)	exon (NM_001039228, exon 1 of 1)	208	NM_001039228	625424	Mm.389677	NM_001039228	ENSMUSG00000051503	Gm6583	EG625424	predicted gene 6583	protein-coding
163.068	0.155695	0.320337	0.486036	0.626942	0.96458	Cx3cr1WT-Cx3cr1KO	chr8	78820052	78820298	+	1000	intron (NM_001191004, intron 1 of 4)	IMPB_01|Satellite|Satellite	977	NM_001191004	78651	Mm.28694	NM_030145	ENSMUSG00000031683	Lsm6	1500031N17Rik|2410088K19Rik|AI747288	LSM6 homolog, U6 small nuclear RNA and mRNA degradation associated	protein-coding
148.677	-0.373028	0.299406	-1.2459	0.212803	0.848028	Cx3cr1WT-Cx3cr1KO	chr9	109038535	109038738	+	1000	promoter-TSS (NM_001284332)	promoter-TSS (NM_001284332)	69	NM_025858	66940	Mm.196533	NM_025858	ENSMUSG00000025647	Shisa5	2310008D10Rik|6430628I05Rik|Scotin|mShisa5	shisa family member 5	protein-coding
159.677	0.539941	0.310813	1.73719	0.0823544	0.655764	Cx3cr1WT-Cx3cr1KO	chr10	93453326	93453609	+	1000	promoter-TSS (NM_001313897)	promoter-TSS (NM_001313897)	71	NM_008517	16993	Mm.271071	NM_008517	ENSMUSG00000015889	Lta4h	-	leukotriene A4 hydrolase	protein-coding
368.822	0.0687142	0.217247	0.316295	0.751779	0.982865	Cx3cr1WT-Cx3cr1KO	chr10	128411645	128411857	+	1000	non-coding (NR_104288, exon 1 of 7)	non-coding (NR_104288, exon 1 of 7)	135	NM_026259	67588	Mm.294120	NM_026259	ENSMUSG00000025373	Rnf41	2210404G21Rik|4930511A05Rik|4933415P08Rik|D10Ertd722e|FLRF|Nrdp1	ring finger protein 41	protein-coding
40.2681	0.034715	0.363439	0.0955181	0.923903	NA	Cx3cr1WT-Cx3cr1KO	chr9	64175677	64176032	+	1000	TTS (NR_028548)	TTS (NR_028548)	422	NR_028548	100217453		NR_028548	ENSMUSG00000094411	Snord16a	MBII-98	small nucleolar RNA, C/D box 16A	snoRNA
79.7893	0.0802141	0.352433	0.227601	0.819957	0.990013	Cx3cr1WT-Cx3cr1KO	chr4	98922914	98923124	+	1000	promoter-TSS (NM_146144)	promoter-TSS (NM_146144)	-791	NM_001301414	230484	Mm.371692	NM_146144	ENSMUSG00000028560	Usp1	-	ubiquitin specific peptidase 1	protein-coding
107.646	0.231153	0.32174	0.718446	0.472482	0.931076	Cx3cr1WT-Cx3cr1KO	chr7	25477414	25477684	+	1000	promoter-TSS (NM_001039187)	promoter-TSS (NM_001039187)	76	NM_001039185	26365	Mm.322502	NM_011926	ENSMUSG00000074272	Ceacam1	Bgp|Bgp1|C-CAM|CD66a|Cc1|Cea-1|Cea-7|Cea1|Cea7|Hv-2|Hv2|MHVR|MHVR1|Mhv-1|bb-1|mCEA1|mmCGM1|mmCGM1a|mmCGM2	carcinoembryonic antigen-related cell adhesion molecule 1	protein-coding
71.9644	-0.0696984	0.350261	-0.19899	0.842271	0.992437	Cx3cr1WT-Cx3cr1KO	chrX	7878234	7878480	+	1000	promoter-TSS (NM_138606)	promoter-TSS (NM_138606)	51	NM_138606	18715	Mm.347478	NM_138606	ENSMUSG00000031155	Pim2	DXCch3|Pim-2	proviral integration site 2	protein-coding
124.242	0.0117121	0.333427	0.0351263	0.971979	0.998197	Cx3cr1WT-Cx3cr1KO	chr18	61211304	61211578	+	1000	5' UTR (NM_007885, exon 1 of 4)	5' UTR (NM_007885, exon 1 of 4)	155	NM_007885	13521	Mm.24803	NM_007885	ENSMUSG00000034320	Slc26a2	Dtd|ST-OB	solute carrier family 26 (sulfate transporter), member 2	protein-coding
112.841	-0.281659	0.3289	-0.856368	0.391794	0.914739	Cx3cr1WT-Cx3cr1KO	chr11	100545414	100545666	+	1000	promoter-TSS (NM_028918)	promoter-TSS (NM_028918)	-92	NM_028918	74407	Mm.31590	NM_028918	ENSMUSG00000006784	Ttc25	4933404O19Rik	tetratricopeptide repeat domain 25	protein-coding
89.2125	-0.13842	0.355044	-0.389869	0.696634	0.978455	Cx3cr1WT-Cx3cr1KO	chr13	30659641	30659900	+	1000	promoter-TSS (NM_001037955)	promoter-TSS (NM_001037955)	-289	NM_001037955	105352	Mm.289646	NM_134068	ENSMUSG00000069255	Dusp22	JKAP|JSP1|LMW-DSP2|MKPX	dual specificity phosphatase 22	protein-coding
95.0925	0.0673832	0.335567	0.200804	0.840852	0.992388	Cx3cr1WT-Cx3cr1KO	chr2	144556175	144556469	+	1000	promoter-TSS (NM_019787)	promoter-TSS (NM_019787)	93	NM_001355380	27054	Mm.248492	NM_019787	ENSMUSG00000027429	Sec23b	-	SEC23 homolog B, COPII coat complex component	protein-coding
48.4106	0.298221	0.362938	0.821685	0.411256	0.915776	Cx3cr1WT-Cx3cr1KO	chr19	47537127	47537338	+	1000	promoter-TSS (NM_175360)	promoter-TSS (NM_175360)	-113	NM_175360	108689	Mm.218048	NM_175360	ENSMUSG00000042694	Stn1	0610009H20Rik|2310057J23Rik|AAF-44|AAF44|AI413458|Obfc1|RPA-32	STN1, CST complex subunit	protein-coding
177.75	0.350921	0.304241	1.15343	0.248734	0.860364	Cx3cr1WT-Cx3cr1KO	chr4	129513503	129513758	+	1000	promoter-TSS (NM_010807)	promoter-TSS (NM_010807)	49	NM_010807	17357	Mm.424974	NM_010807	ENSMUSG00000047945	Marcksl1	AL022768|AW215397|AW536807|D4Bc1|F52|MacMARCKS|Macs2|Macs3|Mlp|Mrp	MARCKS-like 1	protein-coding
71.0643	-0.163516	0.36277	-0.450743	0.652175	0.971373	Cx3cr1WT-Cx3cr1KO	chr4	129821351	129821561	+	1000	intron (NM_001164745, intron 1 of 5)	intron (NM_001164745, intron 1 of 5)	748	NM_001164745	19244	Mm.193688	NM_008974	ENSMUSG00000028788	Ptp4a2	Prl-2	protein tyrosine phosphatase 4a2	protein-coding
28.9896	-0.146224	0.357195	-0.409366	0.682271	NA	Cx3cr1WT-Cx3cr1KO	chr11	101260111	101260443	+	1000	promoter-TSS (NM_175638)	promoter-TSS (NM_175638)	-290	NM_175638	69847	Mm.23656	NM_175638	ENSMUSG00000035112	Wnk4	2010002J11Rik|Pha2b|Prkwnk4	WNK lysine deficient protein kinase 4	protein-coding
118.28	-0.0338085	0.330738	-0.102221	0.918581	0.994132	Cx3cr1WT-Cx3cr1KO	chr1	159231879	159232148	+	1000	promoter-TSS (NM_001360878)	promoter-TSS (NM_001360878)	-187	NM_001360878	26374	Mm.328135	NM_011931	ENSMUSG00000040782	Cop1	AI316802|C80879|Rfwd2	COP1, E3 ubiquitin ligase	protein-coding
101.507	0.426231	0.325761	1.30842	0.190732	0.825863	Cx3cr1WT-Cx3cr1KO	chr9	21955735	21955991	+	1000	exon (NM_025870, exon 1 of 2)	exon (NM_025870, exon 1 of 2)	110	NM_025870	66962	Mm.46647	NM_025870	ENSMUSG00000051238	Swsap1	2310047B19Rik	SWIM type zinc finger 7 associated protein 1	protein-coding
162.093	-0.100722	0.286045	-0.352119	0.724749	0.981655	Cx3cr1WT-Cx3cr1KO	chr9	21287808	21288097	+	1000	promoter-TSS (NM_145416)	promoter-TSS (NM_145416)	17	NM_145416	215194	Mm.290690	NM_145416	ENSMUSG00000035047	Kri1	-	KRI1 homolog	protein-coding
73.3182	-0.348097	0.352048	-0.988779	0.322771	0.900571	Cx3cr1WT-Cx3cr1KO	chr5	31291232	31291454	+	1000	promoter-TSS (NM_026298)	promoter-TSS (NM_026298)	-229	NM_026298	67661	Mm.293023	NM_026298	ENSMUSG00000038564	Ift172	4930553F24Rik|Slb|avc1|wim	intraflagellar transport 172	protein-coding
38.1578	0.00187886	0.360144	0.00521695	0.995837	NA	Cx3cr1WT-Cx3cr1KO	chr2	74578780	74578993	+	1000	promoter-TSS (NM_027133)	promoter-TSS (NM_027133)	62	NM_001110209	69605	Mm.156113	NM_027133	ENSMUSG00000009207	Lnpk	2310011O18Rik|4921514L11Rik|9530051D01Rik|AI666268|Lnp|Lnpk1|Ul|ulnaless	lunapark, ER junction formation factor	protein-coding
93.8213	0.475885	0.33336	1.42754	0.153424	0.78578	Cx3cr1WT-Cx3cr1KO	chr7	126200308	126200558	+	1000	promoter-TSS (NM_001311143)	promoter-TSS (NM_001311143)	68	NM_001311143	74204	Mm.235663	NM_028816	ENSMUSG00000000131	Xpo6	2610005L19Rik|AL022631|C230091E20Rik|R75304|Ranbp20|exp6|mKIAA0370	exportin 6	protein-coding
486.418	-0.106969	0.223933	-0.477684	0.632875	0.966928	Cx3cr1WT-Cx3cr1KO	chr16	91647013	91647240	+	1000	promoter-TSS (NM_178880)	promoter-TSS (NM_178880)	-154	NM_001357351	14450	Mm.4505	NM_010256	ENSMUSG00000022962	Gart	Gaps|Prgs	phosphoribosylglycinamide formyltransferase	protein-coding
128.95	0.253183	0.309425	0.818237	0.413222	0.91588	Cx3cr1WT-Cx3cr1KO	chr7	127588701	127588942	+	1000	promoter-TSS (NM_001033040)	promoter-TSS (NM_001033040)	-104	NM_001360883	233900	Mm.41122	NM_172281	ENSMUSG00000030816	Rnf40	AI848422|BRE1-B|mKIAA0661	ring finger protein 40	protein-coding
97.1987	-0.965379	0.330453	-2.92138	0.00348489	0.253534	Cx3cr1WT-Cx3cr1KO	chr6	121245851	121246077	+	1000	promoter-TSS (NM_011909)	promoter-TSS (NM_011909)	58	NM_011909	24110	Mm.326911	NM_011909	ENSMUSG00000030107	Usp18	1110058H21Rik|AW047653|UBP43|Ubp15	ubiquitin specific peptidase 18	protein-coding
184.359	-0.142491	0.280671	-0.507679	0.611679	0.958833	Cx3cr1WT-Cx3cr1KO	chr3	103914484	103914699	+	1000	exon (NM_001356556, exon 1 of 8)	exon (NM_001356556, exon 1 of 8)	471	NM_172684	229675	Mm.29366	NM_172684	ENSMUSG00000044098	Rsbn1	C230004D03Rik|E330004N01|KDM9|Rosbin|Rsbn|Rsbp|mKIAA3002	rosbin, round spermatid basic protein 1	protein-coding
123.558	-0.434891	0.313333	-1.38795	0.165151	0.804276	Cx3cr1WT-Cx3cr1KO	chr13	67526021	67526228	+	1000	5' UTR (NM_133228, exon 1 of 4)	5' UTR (NM_133228, exon 1 of 4)	107	NM_133228	170763	Mm.491205	NM_133228	ENSMUSG00000097333	Zfp87	2210039O17Rik|4631412O18Rik|KRAB4|Mzf22|Zfp72	zinc finger protein 87	protein-coding
36.2761	-0.0601833	0.362155	-0.166181	0.868014	NA	Cx3cr1WT-Cx3cr1KO	chr9	96195993	96196200	+	1000	promoter-TSS (NM_001184708)	promoter-TSS (NM_001184708)	-179	NM_001184706	211586	Mm.17977	NM_178667	ENSMUSG00000032411	Tfdp2	1110029I05Rik|A330080J22Rik|DP-3|DP3	transcription factor Dp 2	protein-coding
100.79	0.503148	0.329761	1.5258	0.127061	0.743418	Cx3cr1WT-Cx3cr1KO	chr11	77493068	77493317	+	1000	promoter-TSS (NM_001004144)	promoter-TSS (NM_001004144)	-220	NM_001004144	216963	Mm.290182	NM_001004144	ENSMUSG00000011877	Git1	Cat-1|p95Cat	G protein-coupled receptor kinase-interactor 1	protein-coding
328.346	0.29791	0.231278	1.28811	0.197709	0.834817	Cx3cr1WT-Cx3cr1KO	chr5	123394798	123395019	+	1000	5' UTR (NM_177582, exon 1 of 9)	5' UTR (NM_177582, exon 1 of 9)	110	NM_177582	208104	Mm.83277	NM_133917	ENSMUSG00000038342	Mlxip	AW228700|Mir|bHLHe36	MLX interacting protein	protein-coding
289.371	-0.186806	0.252498	-0.739831	0.459403	0.931076	Cx3cr1WT-Cx3cr1KO	chr6	30304403	30304627	+	1000	promoter-TSS (NM_001169576)	promoter-TSS (NM_001169576)	24	NM_009459	22214	Mm.332967	NM_009459	ENSMUSG00000039159	Ube2h	1500009C23Rik|AI181839|AI326965|AI462483|AW227540|E2-20K|Gid3|N28148|Ubc8	ubiquitin-conjugating enzyme E2H	protein-coding
65.0714	0.138396	0.359197	0.385292	0.700021	0.978679	Cx3cr1WT-Cx3cr1KO	chr19	4397457	4397677	+	1000	promoter-TSS (NM_001001984)	promoter-TSS (NM_001001984)	-490	NM_001001984	225876	Mm.31941	NM_001001984	ENSMUSG00000054611	Kdm2a	100043628|5530401A10Rik|AA589516|AW536790|Cxxc8|Fbl11|Fbl7|Fbxl11|Gm4560|Jhdm1|Jhdm1a|lalina	lysine (K)-specific demethylase 2A	protein-coding
148.792	-0.205338	0.310466	-0.661387	0.508364	0.940617	Cx3cr1WT-Cx3cr1KO	chr9	66060171	66060404	+	1000	exon (NM_011149, exon 1 of 5)	exon (NM_011149, exon 1 of 5)	118	NM_011149	19035	Mm.335249	NM_011149	ENSMUSG00000032383	Ppib	AA408962|AA553318|AI844835|Cphn-2|Cphn2|CyP-20b	peptidylprolyl isomerase B	protein-coding
41.7022	0.0139771	0.358261	0.0390137	0.968879	NA	Cx3cr1WT-Cx3cr1KO	chr9	4376159	4376356	+	1000	promoter-TSS (NM_145609)	promoter-TSS (NM_145609)	-295	NM_145609	78100	Mm.206549	NM_145609	ENSMUSG00000041124	Msantd4	8430410K20Rik|Mysantd4	Myb/SANT-like DNA-binding domain containing 4 with coiled-coils	protein-coding
102.04	0.538002	0.331329	1.62377	0.104426	0.707908	Cx3cr1WT-Cx3cr1KO	chr7	25316764	25317015	+	1000	promoter-TSS (NM_001160400)	promoter-TSS (NM_001160400)	-275	NM_001160400	269878	Mm.38527	NM_001160400	ENSMUSG00000045039	Megf8	AW049492|Egfl4|b2b1702.2Clo|b2b1702Clo|b2b288Clo|m687Ddg|mKIAA0817	multiple EGF-like-domains 8	protein-coding
131.919	-0.0473945	0.330231	-0.143519	0.88588	0.993944	Cx3cr1WT-Cx3cr1KO	chr4	155831605	155831883	+	1000	intron (NM_025338, intron 1 of 3)	CpG	475	NM_025338	66077	Mm.28999	NM_025338	ENSMUSG00000065990	Aurkaip1	0610033H09Rik|Aip|Akip|MRP-S38	aurora kinase A interacting protein 1	protein-coding
282.569	1.1164	0.236747	4.71561	2.40991e-06	0.00370928	Cx3cr1WT-Cx3cr1KO	chr16	76373132	76373347	+	1000	promoter-TSS (NM_173440)	promoter-TSS (NM_173440)	-190	NM_173440	268903	Mm.74711	NM_173440	ENSMUSG00000048490	Nrip1	6030458L20Rik|8430438I05Rik|9630050P12|AA959574|AW456757|RIP140	nuclear receptor interacting protein 1	protein-coding
114.757	-0.384518	0.318138	-1.20865	0.226797	0.854106	Cx3cr1WT-Cx3cr1KO	chr1	191026114	191026328	+	1000	promoter-TSS (NM_198025)	promoter-TSS (NM_198025)	-31	NM_198025	226844	Mm.134053	NM_198025	ENSMUSG00000066595	Flvcr1	9630055N22Rik|FLVCR|Mfsd7b	feline leukemia virus subgroup C cellular receptor 1	protein-coding
176.103	-0.150606	0.296667	-0.507662	0.611691	0.958833	Cx3cr1WT-Cx3cr1KO	chr10	18022863	18023207	+	1000	promoter-TSS (NM_001359560)	promoter-TSS (NM_001359560)	55	NM_001359560	73112	Mm.276041	NM_028440	ENSMUSG00000078453	Abracl	1700028I04Rik|3110003A17Rik	ABRA C-terminal like	protein-coding
356.376	-0.374397	0.218352	-1.71465	0.0864103	0.665169	Cx3cr1WT-Cx3cr1KO	chr1	36273296	36273702	+	1000	promoter-TSS (NM_153408)	promoter-TSS (NM_153408)	-74	NM_153408	214854	Mm.389110	NM_153408	ENSMUSG00000047180	Neurl3	2010300P06Rik|Lincr	neuralized E3 ubiquitin protein ligase 3	protein-coding
69.3924	-0.0191205	0.353419	-0.0541015	0.956854	0.998197	Cx3cr1WT-Cx3cr1KO	chr11	115708474	115708683	+	1000	promoter-TSS (NM_008163)	promoter-TSS (NM_008163)	19	NM_008163	14784	Mm.439649	NM_008163	ENSMUSG00000059923	Grb2	AA408164|Ash	growth factor receptor bound protein 2	protein-coding
167.01	-0.128646	0.307466	-0.418408	0.675649	0.9758	Cx3cr1WT-Cx3cr1KO	chr12	82169290	82169519	+	1000	promoter-TSS (NM_001167983)	promoter-TSS (NM_001167983)	-612	NM_001167983	217692	Mm.261333	NM_172579	ENSMUSG00000042700	Sipa1l1	4931426N11Rik|AW213287|Spar|mKIAA0440	signal-induced proliferation-associated 1 like 1	protein-coding
137.508	0.2459	0.312123	0.787832	0.430795	0.922874	Cx3cr1WT-Cx3cr1KO	chr7	141902237	141902476	+	1000	5' UTR (NM_001347562, exon 1 of 7)	5' UTR (NM_001347562, exon 1 of 7)	105	NM_023764	54473	Mm.103551	NM_023764	ENSMUSG00000025139	Tollip	4930403G24Rik|4931428G15Rik	toll interacting protein	protein-coding
30.4391	0.642278	0.360428	1.78199	0.0747511	NA	Cx3cr1WT-Cx3cr1KO	chr8	84912444	84912664	+	1000	promoter-TSS (NR_103491)	promoter-TSS (NR_103491)	-781	NR_103491	100503676	Mm.437155	NR_103491	ENSMUSG00000003812	Gm38426	-	predicted gene, 38426	ncRNA
176.581	0.173247	0.278718	0.621585	0.534215	0.947185	Cx3cr1WT-Cx3cr1KO	chr10	80115719	80115947	+	1000	promoter-TSS (NM_011492)	promoter-TSS (NM_011492)	30	NM_001301854	20869	Mm.44231	NM_011492	ENSMUSG00000003068	Stk11	AA408040|Lkb1|Par-4|R75140	serine/threonine kinase 11	protein-coding
34.8681	-0.320525	0.36289	-0.883256	0.377098	NA	Cx3cr1WT-Cx3cr1KO	chr15	10485990	10486254	+	1000	promoter-TSS (NM_026396)	promoter-TSS (NM_026396)	84	NM_001289447	19355	Mm.38376	NM_011232	ENSMUSG00000022248	Rad1	mRAD1	RAD1 checkpoint DNA exonuclease	protein-coding
303.957	-0.143733	0.264885	-0.542625	0.587388	0.957511	Cx3cr1WT-Cx3cr1KO	chr6	71270786	71271040	+	1000	promoter-TSS (NM_001354706)	promoter-TSS (NM_001354706)	-758	NR_106192	102465900		NR_106192	ENSMUSG00000098623	Mir8112	Gm27739|mmu-mir-8112	microRNA 8112	ncRNA
50.409	-0.383641	0.362333	-1.05881	0.289687	0.885562	Cx3cr1WT-Cx3cr1KO	chr9	106223181	106223409	+	1000	intron (NM_031178, intron 1 of 1)	intron (NM_031178, intron 1 of 1)	697	NM_031178	81897	Mm.44889	NM_031178	ENSMUSG00000045322	Tlr9	-	toll-like receptor 9	protein-coding
214.042	-0.0947696	0.264625	-0.358128	0.720247	0.981655	Cx3cr1WT-Cx3cr1KO	chr3	89998595	89998848	+	1000	promoter-TSS (NM_001310681)	promoter-TSS (NM_001310681)	-5	NM_001282032	23897	Mm.256035	NM_011826	ENSMUSG00000027944	Hax1	HAX-1|HSP1BP-1|Hs1bp1|SIG-111|Silg111|mHAX-1s	HCLS1 associated X-1	protein-coding
96.4946	0.0881029	0.331533	0.265744	0.790436	0.987674	Cx3cr1WT-Cx3cr1KO	chr4	47474143	47474398	+	1000	promoter-TSS (NM_019998)	promoter-TSS (NM_019998)	97	NM_001355496	56737	Mm.22218	NM_019998	ENSMUSG00000039740	Alg2	1110018A23Rik|1300013N08Rik|ALPG2|CDGIi|MNCb-5081	asparagine-linked glycosylation 2 (alpha-1,3-mannosyltransferase)	protein-coding
132.199	0.543916	0.313607	1.73439	0.0828491	0.655764	Cx3cr1WT-Cx3cr1KO	chr2	94437970	94438211	+	1000	promoter-TSS (NM_001349003)	promoter-TSS (NM_001349003)	96	NM_007466	11800	Mm.181824	NM_007466	ENSMUSG00000027193	Api5	AAC-11|AI196452|API-5	apoptosis inhibitor 5	protein-coding
75.5283	-0.0393811	0.347464	-0.113339	0.909762	0.993944	Cx3cr1WT-Cx3cr1KO	chr10	63338881	63339108	+	1000	promoter-TSS (NM_019812)	promoter-TSS (NM_019812)	41	NM_019812	93759	Mm.351459	NM_019812	ENSMUSG00000020063	Sirt1	AA673258|SIR2L1|Sir2|Sir2a|Sir2alpha	sirtuin 1	protein-coding
196.838	0.0171484	0.288661	0.0594069	0.952628	0.998197	Cx3cr1WT-Cx3cr1KO	chr6	71543796	71544192	+	1000	promoter-TSS (NM_001355675)	promoter-TSS (NM_001355675)	142	NM_025783	66700	Mm.181278	NM_025783	ENSMUSG00000053119	Chmp3	25.1|4921505F14Rik|9130011K15Rik|CGI-49|D6Ertd286e|NEDF|Vps24	charged multivesicular body protein 3	protein-coding
104.932	0.108707	0.331776	0.327652	0.743175	0.98239	Cx3cr1WT-Cx3cr1KO	chr19	33391736	33392019	+	1000	intron (NM_001167818, intron 1 of 6)	CpG	418	NM_001167818	67795	Mm.204591	NM_001146342	ENSMUSG00000071573	Rnls	6530404N21Rik|AI452315|AW060440|C10orf59	renalase, FAD-dependent amine oxidase	protein-coding
197.971	0.497488	0.280653	1.77261	0.0762935	0.645104	Cx3cr1WT-Cx3cr1KO	chr8	111643657	111643913	+	1000	intron (NM_001358993, intron 1 of 3)	CpG	342	NM_011742	22640	Mm.4184	NM_011742	ENSMUSG00000055835	Zfp1	Fnp-1|Zfp-1|mkr-1	zinc finger protein 1	protein-coding
159.373	-0.282527	0.295273	-0.956832	0.338652	0.902562	Cx3cr1WT-Cx3cr1KO	chr8	47675319	47675652	+	1000	promoter-TSS (NM_023503)	promoter-TSS (NM_023503)	-326	NM_023503	69260	Mm.430733	NM_023503	ENSMUSG00000063049	Ing2	2810011M06Rik|Ing1l|Ing2b|P33ING2	inhibitor of growth family, member 2	protein-coding
142.895	0.119362	0.336344	0.354881	0.722679	0.981655	Cx3cr1WT-Cx3cr1KO	chr19	44107367	44107671	+	1000	promoter-TSS (NM_007700)	promoter-TSS (NM_007700)	-42	NM_001162410	12675	Mm.3996	NM_007700	ENSMUSG00000025199	Chuk	AI256658|Chuk1|Fbx24|Fbxo24|IKBKA|IKK alpha|IKK1|Ikka|NFKBIKA	conserved helix-loop-helix ubiquitous kinase	protein-coding
69.8303	0.451282	0.350073	1.28911	0.197361	0.834746	Cx3cr1WT-Cx3cr1KO	chr11	21238506	21238874	+	1000	promoter-TSS (NM_139061)	promoter-TSS (NM_139061)	-342	NM_139061	245944	Mm.170103	NM_139061	ENSMUSG00000020128	Vps54	Hcc8|Vps54l|mSLP8|wr	VPS54 GARP complex subunit	protein-coding
241.274	0.706648	0.284734	2.48178	0.0130727	0.384153	Cx3cr1WT-Cx3cr1KO	chr5	143112818	143113075	+	1000	promoter-TSS (NM_207110)	promoter-TSS (NM_207110)	74	NM_207110	108086	Mm.381440	NM_080561	ENSMUSG00000045078	Rnf216	2810055G22Rik|AI647468|AU019462|C86502|F830018F18Rik|TRIAD3|UIP83|Ubce7ip1	ring finger protein 216	protein-coding
40.1801	-0.369246	0.36233	-1.01909	0.308161	NA	Cx3cr1WT-Cx3cr1KO	chr11	79622997	79623254	+	1000	promoter-TSS (NR_003283)	promoter-TSS (NR_003283)	38	NR_003283	790912	Mm.447313	NR_003283	ENSMUSG00000087434	Rab11fip4os1	Gm11202	RAB11 family interacting protein 4 (class II), opposite strand 1	ncRNA
91.6277	-0.162421	0.352048	-0.461361	0.64454	0.970078	Cx3cr1WT-Cx3cr1KO	chr4	133574647	133574854	+	1000	promoter-TSS (NM_172876)	promoter-TSS (NM_172876)	5	NM_172876	242691	Mm.40110	NM_172876	ENSMUSG00000028850	Gpatch3	D930035B09Rik|Gpatc3	G patch domain containing 3	protein-coding
294.11	0.786737	0.263282	2.98819	0.00280635	0.210142	Cx3cr1WT-Cx3cr1KO	chr9	62980729	62980972	+	1000	promoter-TSS (NM_019663)	promoter-TSS (NM_019663)	29	NM_019663	56469	Mm.431253	NM_019663	ENSMUSG00000032405	Pias1	2900068C24Rik|Ddxbp1|GBP	protein inhibitor of activated STAT 1	protein-coding
42.488	-0.460801	0.363462	-1.26781	0.204866	NA	Cx3cr1WT-Cx3cr1KO	chr6	8259319	8259571	+	1000	promoter-TSS (NM_026632)	promoter-TSS (NM_026632)	157	NM_001302353	100036521	Mm.446106	NM_001302353	ENSMUSG00000089862	Umad1	Gm16039	UMAP1-MVP12 associated (UMA) domain containing 1	protein-coding
167.067	-0.502233	0.292283	-1.71831	0.08574	0.664394	Cx3cr1WT-Cx3cr1KO	chr9	78480987	78481193	+	1000	intron (NM_010106, intron 1 of 7)	CpG	634	NM_010106	13627	Mm.138471	NM_010106	ENSMUSG00000037742	Eef1a1	-	eukaryotic translation elongation factor 1 alpha 1	protein-coding
221.509	-0.0960798	0.261273	-0.367738	0.713069	0.981327	Cx3cr1WT-Cx3cr1KO	chr4	152008803	152009045	+	1000	promoter-TSS (NM_001033352)	promoter-TSS (NM_001033352)	33	NM_001033352	242785	Mm.22306	NM_001033352	ENSMUSG00000073700	Klhl21	1810045K06Rik|D330008A20|mKIAA0469	kelch-like 21	protein-coding
216.045	0.105698	0.30247	0.34945	0.726751	0.981655	Cx3cr1WT-Cx3cr1KO	chr11	70525273	70525527	+	1000	promoter-TSS (NM_008946)	promoter-TSS (NM_008946)	43	NM_008946	19175	Mm.98	NM_008946	ENSMUSG00000018286	Psmb6	Lmp19|Mpnd	proteasome (prosome, macropain) subunit, beta type 6	protein-coding
72.564	0.8503	0.347712	2.44542	0.0144684	0.393506	Cx3cr1WT-Cx3cr1KO	chr11	4135168	4135401	+	1000	exon (NM_027859, exon 1 of 9)	exon (NM_027859, exon 1 of 9)	124	NM_027859	71673	Mm.240586	NM_027859	ENSMUSG00000003581	Rnf215	0610009J22Rik|AW557025|C77903	ring finger protein 215	protein-coding
84.4796	0.216414	0.347577	0.622636	0.533524	0.947185	Cx3cr1WT-Cx3cr1KO	chr9	101034888	101035150	+	1000	promoter-TSS (NM_025835)	promoter-TSS (NM_025835)	-135	NM_025835	66904	Mm.335385	NM_025835	ENSMUSG00000032527	Pccb	1300012P06Rik|AI314687|R74805	propionyl Coenzyme A carboxylase, beta polypeptide	protein-coding
118.552	-0.488303	0.325741	-1.49905	0.13386	0.755776	Cx3cr1WT-Cx3cr1KO	chr7	126884533	126884739	+	1000	5' UTR (NM_001163775, exon 1 of 16)	5' UTR (NM_001163775, exon 1 of 16)	331	NM_001163775	381921	Mm.259634	NM_001163774	ENSMUSG00000059981	Taok2	1110033K02Rik|B230344N16|MAP3K17|PSK|PSK1|TAO1|TAO2|mKIAA0881	TAO kinase 2	protein-coding
40.1092	0.442217	0.357955	1.2354	0.216682	NA	Cx3cr1WT-Cx3cr1KO	chr13	35740785	35741175	+	1000	promoter-TSS (NM_001123386)	promoter-TSS (NM_001123386)	-422	NM_001123386	12593	Mm.29002	NM_009881	ENSMUSG00000059288	Cdyl	AI325931	chromodomain protein, Y chromosome-like	protein-coding
90.2589	0.423485	0.351399	1.20514	0.228149	0.854106	Cx3cr1WT-Cx3cr1KO	chr11	118248332	118248571	+	1000	exon (NM_001112699, exon 1 of 13)	exon (NM_001112699, exon 1 of 13)	141	NM_001112699	19157	Mm.86413	NM_011180	ENSMUSG00000017132	Cyth1	CLM1|CTH-1|CYTIP|Pscd1	cytohesin 1	protein-coding
141.266	-0.0509601	0.300782	-0.169425	0.865462	0.993944	Cx3cr1WT-Cx3cr1KO	chr5	137628505	137628740	+	1000	promoter-TSS (NM_001168652)	promoter-TSS (NM_001168652)	-501	NM_001168652	231798	Mm.200763	NM_146164	ENSMUSG00000093445	Lrch4	2810008P14Rik|2900069C24Rik|AI558103|LRN|LRRN4|SAP25|mFLJ00248	leucine-rich repeats and calponin homology (CH) domain containing 4	protein-coding
281.651	-0.192384	0.250159	-0.769046	0.441866	0.926418	Cx3cr1WT-Cx3cr1KO	chr15	78325962	78326230	+	1000	5' UTR (NM_007780, exon 1 of 14)	5' UTR (NM_007780, exon 1 of 14)	106	NM_007780	12983	Mm.235324	NM_007780	ENSMUSG00000071713	Csf2rb	AI848964|AIC2B|Bc|CDw131|Csf2rb1|Csfgmrb|Il3r|Il3rb|Il3rb1|Il5rb	colony stimulating factor 2 receptor, beta, low-affinity (granulocyte-macrophage)	protein-coding
120.005	-0.582218	0.323198	-1.80142	0.0716359	0.636991	Cx3cr1WT-Cx3cr1KO	chr2	25574616	25574913	+	1000	TTS (NM_001005424)	TTS (NM_001005424)	107	NM_029293	75454	Mm.458079	NM_029293	ENSMUSG00000036504	Phpt1	1700008C22Rik|PHP|Php14	phosphohistidine phosphatase 1	protein-coding
93.8804	0.132784	0.337793	0.393094	0.69425	0.977603	Cx3cr1WT-Cx3cr1KO	chr18	31911061	31911371	+	1000	exon (NM_026006, exon 1 of 1)	exon (NM_026006, exon 1 of 1)	687	NM_026006	67158	Mm.31537	NM_026006	ENSMUSG00000044982	Sft2d3	2610206C24Rik|AI847965|AW046173	SFT2 domain containing 3	protein-coding
170.375	-0.207523	0.293637	-0.706731	0.479733	0.931076	Cx3cr1WT-Cx3cr1KO	chr3	90490858	90491069	+	1000	promoter-TSS (NM_133854)	promoter-TSS (NM_133854)	50	NM_133854	20615	Mm.331182	NM_133854	ENSMUSG00000001018	Snapin	25kDa|AA407989|AV026596|Bloc1s7|Snap25bp|Snapap	SNAP-associated protein	protein-coding
70.7621	-0.349243	0.347546	-1.00488	0.314953	0.895746	Cx3cr1WT-Cx3cr1KO	chr6	31220260	31220581	+	1000	promoter-TSS (NR_040257)	promoter-TSS (NR_040257)	69	NR_040259	73652	Mm.441297	NR_040257	ENSMUSG00000087380	2210408F21Rik	-	RIKEN cDNA 2210408F21 gene	ncRNA
56.8234	0.141791	0.35639	0.397855	0.690737	0.977385	Cx3cr1WT-Cx3cr1KO	chr4	107178167	107178376	+	1000	promoter-TSS (NM_025617)	promoter-TSS (NM_025617)	95	NM_025617	66526	Mm.246956	NM_025617	ENSMUSG00000028619	Tceanc2	2210010B22Rik|2210012G02Rik|6330404A07Rik|AU015593|Tdeanc2	transcription elongation factor A (SII) N-terminal and central domain containing 2	protein-coding
228.453	-0.125572	0.303019	-0.414404	0.678578	0.9758	Cx3cr1WT-Cx3cr1KO	chr7	128237989	128238245	+	1000	promoter-TSS (NM_177001)	promoter-TSS (NM_177001)	-86	NM_177001	100043133	Mm.183647	NM_177001	ENSMUSG00000062944	9130023H24Rik	GLI4	RIKEN cDNA 9130023H24 gene	protein-coding
44.4882	0.174947	0.362378	0.482774	0.629256	NA	Cx3cr1WT-Cx3cr1KO	chr7	27553246	27553484	+	1000	promoter-TSS (NM_011116)	promoter-TSS (NM_011116)	75	NM_175107	66367	Mm.29831	NM_175107	ENSMUSG00000049643	2310022A10Rik	-	RIKEN cDNA 2310022A10 gene	protein-coding
138.488	0.250642	0.300011	0.835445	0.403467	0.914739	Cx3cr1WT-Cx3cr1KO	chr19	4793704	4793984	+	1000	promoter-TSS (NM_001290125)	promoter-TSS (NM_001290125)	57	NM_009032	19653	Mm.426069	NM_009032	ENSMUSG00000094936	Rbm4	4921506I22Rik|Lark1|Mlark|Rbm4a|lark	RNA binding motif protein 4	protein-coding
90.2343	-0.210044	0.336654	-0.623915	0.532683	0.947185	Cx3cr1WT-Cx3cr1KO	chr10	4387086	4387308	+	1000	intron (NM_001033466, intron 1 of 2)	CpG	278	NM_001359811	381990	Mm.262466	NM_001033466	ENSMUSG00000075327	Zbtb2	Gm1103	zinc finger and BTB domain containing 2	protein-coding
104.451	0.3992	0.328594	1.21487	0.224415	0.854106	Cx3cr1WT-Cx3cr1KO	chr18	82911512	82911798	+	1000	intron (NM_183033, intron 1 of 5)	intron (NM_183033, intron 1 of 5)	776	NM_183033	329003	Mm.326526	NM_183033	ENSMUSG00000058881	Zfp516	C330029B10Rik|D230016L03|Zfp26l|Znf516|mKIAA0222	zinc finger protein 516	protein-coding
98.3744	0.128381	0.330272	0.388712	0.697489	0.978679	Cx3cr1WT-Cx3cr1KO	chr19	7020140	7020405	+	1000	promoter-TSS (NM_153795)	promoter-TSS (NM_153795)	-803	NM_001362399	108101	Mm.157591	NM_153795	ENSMUSG00000024965	Fermt3	C79673|Kindlin3	fermitin family member 3	protein-coding
63.8858	-0.0359486	0.35344	-0.101711	0.918986	0.994163	Cx3cr1WT-Cx3cr1KO	chr1	36068039	36068236	+	1000	promoter-TSS (NM_015818)	promoter-TSS (NM_015818)	-263	NM_015818	50785	Mm.213566	NM_015818	ENSMUSG00000045216	Hs6st1	6Ost1	heparan sulfate 6-O-sulfotransferase 1	protein-coding
234.73	0.0794547	0.281927	0.281827	0.778076	0.98628	Cx3cr1WT-Cx3cr1KO	chr13	107889987	107890224	+	1000	promoter-TSS (NM_145456)	promoter-TSS (NM_145456)	-41	NM_145456	67263	Mm.490418	NM_145456		Zswim6	2900036G02Rik|mKIAA1577	zinc finger SWIM-type containing 6	protein-coding
56.9683	-0.276901	0.356441	-0.776848	0.437248	0.925546	Cx3cr1WT-Cx3cr1KO	chr5	104571406	104571795	+	1000	promoter-TSS (NM_001346671)	promoter-TSS (NM_001346671)	-72	NM_001346672	69623	Mm.69919	NM_027142		Zfp33b	2310012P17Rik	zinc finger protein 33B	protein-coding
295.27	0.120648	0.249407	0.483738	0.628572	0.965167	Cx3cr1WT-Cx3cr1KO	chr9	64811394	64811629	+	1000	5' UTR (NM_001162917, exon 2 of 35)	5' UTR (NM_001162917, exon 2 of 35)	500	NM_001162917	102442	Mm.222473	NM_176935	ENSMUSG00000053641	Dennd4a	AI115600|AI851943|F730015K02Rik	DENN/MADD domain containing 4A	protein-coding
75.4052	0.0113686	0.352223	0.0322767	0.974251	0.998197	Cx3cr1WT-Cx3cr1KO	chr16	33966873	33967160	+	1000	promoter-TSS (NM_009471)	promoter-TSS (NM_009471)	22	NM_001348087	22247	Mm.13145	NM_009471	ENSMUSG00000022814	Umps	1700095D23Rik|AA408257|AL033308|BB164745	uridine monophosphate synthetase	protein-coding
61.9174	-0.316627	0.35623	-0.888828	0.374095	0.909823	Cx3cr1WT-Cx3cr1KO	chrX	53057023	53057298	+	1000	promoter-TSS (NR_038184)	promoter-TSS (NR_038184)	30	NR_038185	72575	Mm.59516	NR_038184		C430049B03Rik	2700063P19Rik|9430052C07Rik|mir-322|mir-351|mir-503	RIKEN cDNA C430049B03 gene	ncRNA
176.789	0.791558	0.301912	2.62181	0.00874631	0.321565	Cx3cr1WT-Cx3cr1KO	chr15	76246742	76246984	+	1000	promoter-TSS (NM_023168)	promoter-TSS (NM_023168)	56	NM_023168	66168	Mm.41665	NM_023168	ENSMUSG00000022564	Grina	1110025J15Rik|Lag|Tmbim3	glutamate receptor, ionotropic, N-methyl D-aspartate-associated protein 1 (glutamate binding)	protein-coding
153.416	0.0585935	0.336011	0.17438	0.861567	0.993944	Cx3cr1WT-Cx3cr1KO	chr9	79759617	79760069	+	1000	promoter-TSS (NM_009945)	promoter-TSS (NM_009945)	10	NM_009945	12866	Mm.152627	NM_009945	ENSMUSG00000032330	Cox7a2	COX7AL|Cox7a3|CoxVIIa-L	cytochrome c oxidase subunit VIIa 2	protein-coding
120.611	0.0464133	0.336033	0.138121	0.890144	0.993944	Cx3cr1WT-Cx3cr1KO	chr11	96916309	96916565	+	1000	promoter-TSS (NM_001308183)	promoter-TSS (NM_001308183)	77	NM_001308183	80280	Mm.28297	NM_030248	ENSMUSG00000018669	Cdk5rap3	1810007E24Rik|BC002318|C53|C81486|HSF-27|IC53|LZAP|MST016	CDK5 regulatory subunit associated protein 3	protein-coding
89.7252	0.122821	0.338892	0.362418	0.71704	0.981327	Cx3cr1WT-Cx3cr1KO	chr13	117025207	117025715	+	1000	promoter-TSS (NM_001081009)	promoter-TSS (NM_001081009)	55	NM_001081009	52552	Mm.274466	NM_027272	ENSMUSG00000021725	Parp8	2810430O08Rik|ARTD16|D13Ertd275e	poly (ADP-ribose) polymerase family, member 8	protein-coding
95.8297	0.186569	0.328915	0.567226	0.57056	0.953728	Cx3cr1WT-Cx3cr1KO	chr1	125434772	125435055	+	1000	intron (NM_001205386, intron 2 of 12)	intron (NM_001205386, intron 2 of 12)	814	NM_001205386	74117	Mm.183102	NM_023735	ENSMUSG00000026341	Actr3	1200003A09Rik|Arp3	ARP3 actin-related protein 3	protein-coding
279.192	0.314319	0.253242	1.24118	0.214539	0.852102	Cx3cr1WT-Cx3cr1KO	chr8	94179113	94179361	+	1000	5' UTR (NM_013602, exon 1 of 3)	5' UTR (NM_013602, exon 1 of 3)	148	NM_013602	17748	Mm.192991	NM_013602	ENSMUSG00000031765	Mt1	MT-I|Mt-1	metallothionein 1	protein-coding
221.883	0.469447	0.282533	1.66157	0.0965999	0.692229	Cx3cr1WT-Cx3cr1KO	chr11	95859139	95859347	+	1000	intron (NR_045187, intron 1 of 1)	CpG	426	NR_045187	73906	Mm.399894	NR_045187	ENSMUSG00000086015	4833417C18Rik	-	RIKEN cDNA 4833417C18 gene	ncRNA
73.3982	-0.436584	0.350485	-1.24566	0.21289	0.848028	Cx3cr1WT-Cx3cr1KO	chr11	6416456	6416704	+	1000	intron (NM_008907, intron 1 of 4)	intron (NM_008907, intron 1 of 4)	710	NM_008907	268373	Mm.5246	NM_008907	ENSMUSG00000071866	Ppia	2700098C05|Cphn|CyP-18|CypA	peptidylprolyl isomerase A	protein-coding
349.836	0.134915	0.244248	0.552369	0.580695	0.955386	Cx3cr1WT-Cx3cr1KO	chr11	50325830	50326067	+	1000	promoter-TSS (NM_007597)	promoter-TSS (NM_007597)	-275	NM_001110500	12330	Mm.248827	NM_007597	ENSMUSG00000020368	Canx	1110069N15Rik|AI988026|Cnx|D11Ertd153e	calnexin	protein-coding
47.9279	0.0133973	0.362391	0.0369693	0.97051	0.998197	Cx3cr1WT-Cx3cr1KO	chr18	10181305	10181523	+	1000	5' UTR (NM_009071, exon 1 of 33)	5' UTR (NM_009071, exon 1 of 33)	378	NM_009071	19877	Mm.6710	NM_009071	ENSMUSG00000024290	Rock1	1110055K06Rik|Rock-I	Rho-associated coiled-coil containing protein kinase 1	protein-coding
93.4265	-0.231615	0.339063	-0.683104	0.494541	0.934963	Cx3cr1WT-Cx3cr1KO	chr9	107770806	107771044	+	1000	promoter-TSS (NM_148930)	promoter-TSS (NM_148930)	77	NM_148930	83486	Mm.259197	NM_148930	ENSMUSG00000032580	Rbm5	D030069N10Rik	RNA binding motif protein 5	protein-coding
36.7781	-0.652335	0.362713	-1.79849	0.0720997	NA	Cx3cr1WT-Cx3cr1KO	chr2	66125006	66125216	+	1000	promoter-TSS (NM_015736)	promoter-TSS (NM_015736)	-318	NM_015736	14425	Mm.439760	NM_015736	ENSMUSG00000026994	Galnt3	-	polypeptide N-acetylgalactosaminyltransferase 3	protein-coding
42.2846	0.240018	0.363617	0.660084	0.5092	NA	Cx3cr1WT-Cx3cr1KO	chr7	45872697	45873000	+	1000	promoter-TSS (NM_133950)	promoter-TSS (NM_133950)	8	NM_133950	68137	Mm.298433	NM_133950	ENSMUSG00000002778	Kdelr1	8030486F04Rik|AW215843|Erd2.1	KDEL (Lys-Asp-Glu-Leu) endoplasmic reticulum protein retention receptor 1	protein-coding
97.2547	0.301088	0.335755	0.89675	0.369852	0.909567	Cx3cr1WT-Cx3cr1KO	chr16	37868083	37868313	+	1000	promoter-TSS (NM_177093)	promoter-TSS (NM_177093)	-202	NM_177093	320184	Mm.390882	NM_177093	ENSMUSG00000034158	Lrrc58	1810012N18Rik|C330018J07Rik	leucine rich repeat containing 58	protein-coding
471.517	-0.026255	0.210607	-0.124664	0.90079	0.993944	Cx3cr1WT-Cx3cr1KO	chr2	32961507	32961813	+	1000	promoter-TSS (NM_009076)	promoter-TSS (NM_009076)	-52	NM_009076	269261	Mm.250030	NM_009076	ENSMUSG00000038900	Rpl12	E430018F03	ribosomal protein L12	protein-coding
440.296	0.14011	0.201565	0.695111	0.486986	0.931515	Cx3cr1WT-Cx3cr1KO	chr11	117848911	117849154	+	1000	promoter-TSS (NM_009689)	promoter-TSS (NM_009689)	-205	NM_001012273	11799	Mm.8552	NM_009689	ENSMUSG00000017716	Birc5	AAC-11|Api4|TIAP|survivin40	baculoviral IAP repeat-containing 5	protein-coding
62.8503	-0.512387	0.359373	-1.42578	0.153932	0.785798	Cx3cr1WT-Cx3cr1KO	chr11	115612899	115613115	+	1000	promoter-TSS (NM_001243586)	promoter-TSS (NM_001243586)	-38	NM_001243587	69674	Mm.390387	NM_027162	ENSMUSG00000020743	Mif4gd	1110014L05Rik|2310075G12Rik	MIF4G domain containing	protein-coding
48.9982	-0.887683	0.361989	-2.45224	0.014197	0.392862	Cx3cr1WT-Cx3cr1KO	chr1	37997365	37997574	+	1000	promoter-TSS (NM_198303)	promoter-TSS (NM_198303)	-261	NM_172054	98258	Mm.28438	NM_172054	ENSMUSG00000058407	Txndc9	AI098020|APACD	thioredoxin domain containing 9	protein-coding
111.917	0.96994	0.318471	3.04562	0.00232205	0.193605	Cx3cr1WT-Cx3cr1KO	chr17	28232637	28232917	+	1000	promoter-TSS (NM_011145)	promoter-TSS (NM_011145)	23	NM_011145	19015	Mm.328914	NM_011145	ENSMUSG00000002250	Ppard	NUC-1|NUC1|Nr1c2|PPAR-beta|PPAR-delta|PPAR[b]|PPARdelta|Pparb|Pparb/d	peroxisome proliferator activator receptor delta	protein-coding
194.027	-0.280628	0.278976	-1.00592	0.314453	0.895746	Cx3cr1WT-Cx3cr1KO	chr4	116221551	116221774	+	1000	promoter-TSS (NM_001355584)	promoter-TSS (NM_001355584)	54	NM_181585	18710	Mm.253819	NM_181585	ENSMUSG00000028698	Pik3r3	AA414954|p55|p55pik	phosphoinositide-3-kinase regulatory subunit 3	protein-coding
72.9822	-0.272518	0.348745	-0.781425	0.434552	0.924854	Cx3cr1WT-Cx3cr1KO	chr10	79928113	79928359	+	1000	intron (NM_001288625, intron 1 of 8)	intron (NM_001288625, intron 1 of 8)	895	NM_001288625	13496	Mm.301282	NM_007880	ENSMUSG00000019564	Arid3a	Bright|Dri1|Dril1	AT rich interactive domain 3A (BRIGHT-like)	protein-coding
27.8133	-0.174538	0.358515	-0.486836	0.626375	NA	Cx3cr1WT-Cx3cr1KO	chr18	34221523	34221719	+	1000	non-coding (NR_040534, exon 1 of 2)	non-coding (NR_040534, exon 1 of 2)	151	NR_040534	633395	Mm.414290	NR_040534	ENSMUSG00000073607	Gm10548	-	ribosomal protein L29 pseudogene	pseudo
133.883	-0.00174509	0.313064	-0.00557424	0.995552	0.999755	Cx3cr1WT-Cx3cr1KO	chr6	72345018	72345433	+	1000	promoter-TSS (NM_138592)	promoter-TSS (NM_138592)	-50	NM_138592	28035	Mm.281900	NM_138592	ENSMUSG00000056305	Usp39	AA408960|AI894154|CGI-21|D6Wsu157e|SAD1	ubiquitin specific peptidase 39	protein-coding
34.7826	0.242693	0.360224	0.673728	0.500484	NA	Cx3cr1WT-Cx3cr1KO	chr4	44981373	44981591	+	1000	promoter-TSS (NM_001312880)	promoter-TSS (NM_001312880)	88	NM_001312880	76238	Mm.196574	NM_080289	ENSMUSG00000035637	Grhpr	1110059D05Rik|6430629L09Rik|Glxr	glyoxylate reductase/hydroxypyruvate reductase	protein-coding
121.222	0.20571	0.333855	0.616166	0.537785	0.947185	Cx3cr1WT-Cx3cr1KO	chr4	136053234	136053466	+	1000	promoter-TSS (NM_025919)	promoter-TSS (NM_025919)	21	NM_025919	67025	Mm.276856	NM_025919	ENSMUSG00000059291	Rpl11	2010203J19Rik	ribosomal protein L11	protein-coding
67.4669	-0.369556	0.356336	-1.0371	0.29969	0.892713	Cx3cr1WT-Cx3cr1KO	chr1	165194167	165194363	+	1000	exon (NM_145512, exon 1 of 8)	exon (NM_145512, exon 1 of 8)	168	NM_145512	108735	Mm.288369	NM_145512	ENSMUSG00000040848	Sft2d2	2010005O13Rik|AI506168|AW561909|cI-45	SFT2 domain containing 2	protein-coding
127.117	0.248814	0.33266	0.747953	0.454488	0.930724	Cx3cr1WT-Cx3cr1KO	chr7	45466680	45466904	+	1000	5' UTR (NM_007527, exon 1 of 6)	5' UTR (NM_007527, exon 1 of 6)	106	NM_007527	12028	Mm.19904	NM_007527	ENSMUSG00000003873	Bax	-	BCL2-associated X protein	protein-coding
159.128	0.843014	0.299472	2.815	0.00487771	0.263428	Cx3cr1WT-Cx3cr1KO	chr18	49832501	49832775	+	1000	promoter-TSS (NM_001081371)	promoter-TSS (NM_001081371)	-359	NM_001081371	240283	Mm.257790	NM_001081371	ENSMUSG00000037416	Dmxl1	C630007L23Rik|D030030C22	Dmx-like 1	protein-coding
81.6871	-0.424632	0.34478	-1.2316	0.218098	0.854106	Cx3cr1WT-Cx3cr1KO	chr11	77513459	77513689	+	1000	promoter-TSS (NM_001024920)	promoter-TSS (NM_001024920)	-301	NM_001024920	216964	Mm.341211	NM_001024920	ENSMUSG00000044328	Trp53i13	2410019G02Rik|Tp53i13	transformation related protein 53 inducible protein 13	protein-coding
139.392	0.628914	0.302347	2.08011	0.0375156	0.525219	Cx3cr1WT-Cx3cr1KO	chr16	32079131	32079381	+	1000	promoter-TSS (NM_177326)	promoter-TSS (NM_177326)	86	NM_177326	224105	Mm.234204	NM_177326	ENSMUSG00000022781	Pak2	5330420P17Rik|A130002K10Rik|AI836325|D16Ertd269e|PAK-2|mKIAA4182	p21 (RAC1) activated kinase 2	protein-coding
75.3415	-0.103474	0.354311	-0.292043	0.770254	0.984237	Cx3cr1WT-Cx3cr1KO	chr19	12574249	12574517	+	1000	intron (NM_026640, intron 1 of 3)	intron (NM_026640, intron 1 of 3)	858	NM_026640	107373	Mm.1643	NM_026640	ENSMUSG00000024691	Fam111a	4632417K18Rik|AW413625	family with sequence similarity 111, member A	protein-coding
65.0096	-0.0785512	0.357103	-0.219968	0.825896	0.990948	Cx3cr1WT-Cx3cr1KO	chr3	8924583	8924912	+	1000	promoter-TSS (NM_025434)	promoter-TSS (NM_025434)	-890	NM_025434	66230	Mm.38460	NM_025434	ENSMUSG00000040269	Mrps28	1500012D08Rik|AW061224	mitochondrial ribosomal protein S28	protein-coding
71.3455	-0.0426944	0.346239	-0.123309	0.901862	0.993944	Cx3cr1WT-Cx3cr1KO	chr12	103425678	103425886	+	1000	promoter-TSS (NM_020494)	promoter-TSS (NM_020494)	-2	NM_001159502	27225	Mm.3935	NM_020494	ENSMUSG00000041645	Ddx24	1700055J08Rik|2510027P10Rik|AI649272	DEAD (Asp-Glu-Ala-Asp) box polypeptide 24	protein-coding
324.027	-0.173185	0.235028	-0.736872	0.4612	0.931076	Cx3cr1WT-Cx3cr1KO	chr17	24720042	24720238	+	1000	promoter-TSS (NM_008503)	promoter-TSS (NM_008503)	77	NM_008503	16898	Mm.157452	NM_008503	ENSMUSG00000044533	Rps2	Llrep3|S4	ribosomal protein S2	protein-coding
33.1927	-0.425727	0.36179	-1.17673	0.239305	NA	Cx3cr1WT-Cx3cr1KO	chr12	13249057	13249262	+	1000	promoter-TSS (NM_134040)	promoter-TSS (NM_134040)	15	NM_134040	104721	Mm.251255	NM_134040	ENSMUSG00000037149	Ddx1	AA409185|DBP-RB	DEAD (Asp-Glu-Ala-Asp) box polypeptide 1	protein-coding
108.468	0.0224365	0.320961	0.0699041	0.94427	0.996499	Cx3cr1WT-Cx3cr1KO	chr12	84617168	84617439	+	1000	exon (NM_008992, exon 1 of 19)	exon (NM_008992, exon 1 of 19)	163	NM_008992	19300	Mm.229109	NM_008992	ENSMUSG00000021240	Abcd4	P69r|P70R|Pxmp1l	ATP-binding cassette, sub-family D (ALD), member 4	protein-coding
189.608	-0.336249	0.288256	-1.1665	0.243413	0.860364	Cx3cr1WT-Cx3cr1KO	chr5	66151543	66151749	+	1000	promoter-TSS (NM_001291226)	promoter-TSS (NM_001291226)	308	NM_001127382	245945	Mm.36863	NM_139065	ENSMUSG00000070780	Rbm47	9530077J19Rik	RNA binding motif protein 47	protein-coding
137.545	0.443282	0.308886	1.4351	0.151259	0.781834	Cx3cr1WT-Cx3cr1KO	chr3	95996075	95996311	+	1000	promoter-TSS (NM_023320)	promoter-TSS (NM_023320)	-354	NM_023320	67220	Mm.458147	NM_023320	ENSMUSG00000015745	Plekho1	2810052M02Rik|CKIP-1|Ckip1|JZA-20|Jza2	pleckstrin homology domain containing, family O member 1	protein-coding
124.438	0.19931	0.337918	0.589816	0.555314	0.952473	Cx3cr1WT-Cx3cr1KO	chr3	95855688	95856096	+	1000	promoter-TSS (NM_027541)	promoter-TSS (NM_027541)	-7	NR_151629	70767	Mm.279872	NM_027541	ENSMUSG00000015748	Prpf3	3632413F13Rik	pre-mRNA processing factor 3	protein-coding
135.331	-0.216821	0.314152	-0.690179	0.490082	0.933101	Cx3cr1WT-Cx3cr1KO	chr5	147076424	147076847	+	1000	promoter-TSS (NM_181730)	promoter-TSS (NM_181730)	-63	NM_080795	140887	Mm.272203	NM_080795	ENSMUSG00000016520	Lnx2	9630046H24|AW209022	ligand of numb-protein X 2	protein-coding
234.315	0.251501	0.270831	0.92863	0.353081	0.902562	Cx3cr1WT-Cx3cr1KO	chr7	99706665	99706924	+	1000	promoter-TSS (NM_001252530)	promoter-TSS (NM_001252530)	48	NM_001252530	101488	Mm.11249	NM_175316	ENSMUSG00000030737	Slco2b1	AI060904|AI852653|OATP-B|Slc21a9	solute carrier organic anion transporter family, member 2b1	protein-coding
40.587	0.097602	0.363596	0.268435	0.788364	NA	Cx3cr1WT-Cx3cr1KO	chr3	27316940	27317185	+	1000	promoter-TSS (NM_009425)	promoter-TSS (NM_009425)	-15	NM_009425	22035	Mm.1062	NM_009425	ENSMUSG00000039304	Tnfsf10	A330042I21Rik|AI448571|APO-2L|Ly81|TL2|Tnlg6a|Trail	tumor necrosis factor (ligand) superfamily, member 10	protein-coding
319.679	-0.238172	0.247181	-0.963551	0.335271	0.902562	Cx3cr1WT-Cx3cr1KO	chr3	90079560	90079787	+	1000	5' UTR (NM_001293749, exon 1 of 8)	5' UTR (NM_001293749, exon 1 of 8)	152	NM_001293749	59069	Mm.240839	NM_022314	ENSMUSG00000027940	Tpm3	TM30nm|TMnm|Tm5NM|Tpm-5|Tpm5|Trop-5|gamma-TM|hTM30nm|hTMnm	tropomyosin 3, gamma	protein-coding
71.0894	-0.469202	0.355661	-1.31924	0.187089	0.822001	Cx3cr1WT-Cx3cr1KO	chr1	172500170	172500409	+	1000	promoter-TSS (NM_178598)	promoter-TSS (NM_178598)	43	NM_178598	21346	Mm.271711	NM_178598	ENSMUSG00000026547	Tagln2	2700094C18Rik|SM22beta|Sm22B|Sm22a	transgelin 2	protein-coding
178.721	-0.330111	0.293407	-1.12509	0.260549	0.867636	Cx3cr1WT-Cx3cr1KO	chr11	70669367	70669565	+	1000	promoter-TSS (NM_172561)	promoter-TSS (NM_172561)	-50	NM_001167669	216873	Mm.432524	NM_172561	ENSMUSG00000018287	Spag7	5730443G10|ACRP|FSA-1|Fsa1l	sperm associated antigen 7	protein-coding
30.4648	-0.10742	0.359599	-0.298721	0.765153	NA	Cx3cr1WT-Cx3cr1KO	chr10	22148585	22148816	+	1000	exon (NM_001254744, exon 1 of 2)	exon (NM_001254744, exon 1 of 2)	570	NM_001254744	319887	Mm.177746	NM_001254744	ENSMUSG00000097327	E030030I06Rik	-	RIKEN cDNA E030030I06 gene	protein-coding
119.596	0.31793	0.312905	1.01606	0.309601	0.892713	Cx3cr1WT-Cx3cr1KO	chr9	122351675	122351948	+	1000	exon (NM_026179, exon 1 of 7)	exon (NM_026179, exon 1 of 7)	195	NM_026179	67469	Mm.280254	NM_026179	ENSMUSG00000032540	Abhd5	1300003D03Rik|2010002J10Rik|CDS|CGI-58|IECN5|NCIE2	abhydrolase domain containing 5	protein-coding
26.5677	-0.47597	0.354597	-1.34228	0.179504	NA	Cx3cr1WT-Cx3cr1KO	chr6	47953394	47953595	+	1000	non-coding (NR_027963, exon 6 of 6)	non-coding (NR_027963, exon 6 of 6)	104	NM_178898	101197	Mm.241063	NM_178898	ENSMUSG00000045466	Zfp956	AI894139	zinc finger protein 956	protein-coding
51.6222	0.208328	0.360245	0.578295	0.563065	0.953728	Cx3cr1WT-Cx3cr1KO	chr11	72550113	72550450	+	1000	promoter-TSS (NM_029932)	promoter-TSS (NM_029932)	-35	NM_029932	77577	Mm.46185	NM_029932	ENSMUSG00000020798	Spns3	9830002I17Rik	spinster homolog 3	protein-coding
150.351	0.268954	0.320072	0.840294	0.400744	0.914739	Cx3cr1WT-Cx3cr1KO	chr10	61452659	61452906	+	1000	promoter-TSS (NM_010124)	promoter-TSS (NM_010124)	-113	NM_010124	13688	Mm.259516	NM_010124	ENSMUSG00000020091	Eif4ebp2	2810011I19Rik|4E-BP2|AA792569|BC010348|PHAS-II	eukaryotic translation initiation factor 4E binding protein 2	protein-coding
431.283	-0.185265	0.213592	-0.867381	0.385733	0.914739	Cx3cr1WT-Cx3cr1KO	chr15	103453749	103453980	+	1000	promoter-TSS (NM_153505)	promoter-TSS (NM_153505)	39	NM_153505	105855	Mm.30805	NM_153505	ENSMUSG00000022488	Nckap1l	4930568P13Rik|AI463083|Hem1|Hemp1	NCK associated protein 1 like	protein-coding
63.6572	0.444071	0.353011	1.25795	0.208409	0.845422	Cx3cr1WT-Cx3cr1KO	chr2	25575400	25575670	+	1000	promoter-TSS (NM_029293)	promoter-TSS (NM_029293)	-664	NM_029293	75454	Mm.458079	NM_029293	ENSMUSG00000036504	Phpt1	1700008C22Rik|PHP|Php14	phosphohistidine phosphatase 1	protein-coding
225.056	-0.135452	0.281198	-0.481696	0.630022	0.965453	Cx3cr1WT-Cx3cr1KO	chr1	178405590	178405871	+	1000	promoter-TSS (NM_026626)	promoter-TSS (NM_026626)	-288	NM_026626	68226	Mm.252132	NM_026626	ENSMUSG00000026495	Efcab2	1700073K01Rik|D830011E08Rik	EF-hand calcium binding domain 2	protein-coding
[truncated: 8,813 more rows]

## Sheet: padj<0.05
baseMean	log2FoldChange	lfcSE	stat	pvalue	padj	contrast	Chr	Start	End	Strand	Peak Score	Annotation	Detailed Annotation	Distance to TSS	Nearest PromoterID	Entrez ID	Nearest Unigene	Nearest Refseq	Nearest Ensembl	Gene Name	Gene Alias	Gene Description	Gene Type
[truncated: 19 more rows]
