# Supplementary material for: Cx3cr1-deficient microglia exhibit a premature aging transcriptome
Source: Life Sci Alliance. 2019 Nov 27;2(6):e201900453. doi: 10.26508/lsa.201900453 (PMC6892408; doi:10.26508/lsa.201900453)
Supplement: Supplementary file 8 [file LSA-2019-00453_TableS8.xlsx]

## Sheet: Read me
Comparison: Time course study, WT mice only, 2 mo vs 2 yr
Tab 2: RSEM output table
GeneID	Gene symbol and ENSEMBL ID
baseMean	Average of all samples
log2FoldChange	Log2FoldChange for WT(2 mo vs 2yr) comparison
lfcSE	Standard eror of Log2(FC)
stat	Statistic
pvalue	P-value
padj	Adjusted p-value
symbol	Gene symbol
Tab 3: Filtred list: FDR (pvalue) < 0.05; baseMean > 4; Fold change > 30%

## Sheet: DEG_CX3CR1_seqr_WT _time_2movs2
gene	baseMean	log2FoldChange	lfcSE	stat	pvalue	padj	name	description
ENSMUSG00000040612	541.863	-3.25469	0.106223	-30.6402	3.56883e-206	6.88784e-202	ILDR2	immunoglobulin-like domain containing receptor 2 [Source:MGI Symbol;Acc:MGI:1196370]
ENSMUSG00000069273	109.046	4.45408	0.183764	24.238	8.85332e-130	8.54345e-126	HIST1H3E	histone cluster 1, H3e [Source:MGI Symbol;Acc:MGI:2448326]
ENSMUSG00000042529	196.76	-3.25568	0.142827	-22.7945	5.19601e-115	3.34277e-111	KCNJ12	potassium inwardly-rectifying channel, subfamily J, member 12 [Source:MGI Symbol;Acc:MGI:108495]
ENSMUSG00000031995	552.93	-1.56915	0.0695206	-22.571	8.35113e-113	4.02942e-109	ST14	suppression of tumorigenicity 14 (colon carcinoma) [Source:MGI Symbol;Acc:MGI:1338881]
ENSMUSG00000043943	1137.24	-1.9839	0.0892884	-22.2191	2.2477e-109	8.67611e-106	NAALAD2	N-acetylated alpha-linked acidic dipeptidase 2 [Source:MGI Symbol;Acc:MGI:1919810]
ENSMUSG00000072612	201.891	3.54008	0.167935	21.08	1.21293e-98	3.9016e-95	GM10382	predicted gene 10382 [Source:MGI Symbol;Acc:MGI:3647829]
ENSMUSG00000025854	367.406	-2.09529	0.106616	-19.6528	5.47569e-86	1.50973e-82	FAM20C	family with sequence similarity 20, member C [Source:MGI Symbol;Acc:MGI:2136853]
ENSMUSG00000021782	93.7799	-3.38845	0.182867	-18.5296	1.19161e-76	2.87476e-73	DLG5	discs, large homolog 5 (Drosophila) [Source:MGI Symbol;Acc:MGI:1918478]
ENSMUSG00000045502	309.314	-2.27495	0.125141	-18.1791	7.56301e-74	1.62185e-70	HCAR2	hydroxycarboxylic acid receptor 2 [Source:MGI Symbol;Acc:MGI:1933383]
ENSMUSG00000073409	318.938	-2.00418	0.112389	-17.8326	3.94634e-71	7.61643e-68	H2-Q6	histocompatibility 2, Q region locus 6 [Source:MGI Symbol;Acc:MGI:95935]
ENSMUSG00000002602	1190.15	-1.791	0.104537	-17.1326	8.47112e-66	1.4863e-62	AXL	AXL receptor tyrosine kinase [Source:MGI Symbol;Acc:MGI:1347244]
ENSMUSG00000066170	203.355	2.50357	0.152044	16.4661	6.42428e-61	1.03324e-57	E230001N04RIK	RIKEN cDNA E230001N04 gene [Source:MGI Symbol;Acc:MGI:2443549]
ENSMUSG00000049436	3437.79	-1.09912	0.067336	-16.3229	6.78672e-60	1.00757e-56	UPK1B	uroplakin 1B [Source:MGI Symbol;Acc:MGI:98912]
ENSMUSG00000024529	60.591	-2.84227	0.174683	-16.271	1.58582e-59	2.18616e-56	LOX	lysyl oxidase [Source:MGI Symbol;Acc:MGI:96817]
ENSMUSG00000025804	342.226	1.95131	0.120023	16.2578	1.96822e-59	2.53245e-56	CCR1	chemokine (C-C motif) receptor 1 [Source:MGI Symbol;Acc:MGI:104618]
ENSMUSG00000001120	77.8067	-2.37117	0.14631	-16.2064	4.54466e-59	5.48199e-56	PCBP3	poly(rC) binding protein 3 [Source:MGI Symbol;Acc:MGI:1890470]
ENSMUSG00000028362	149.398	-2.10299	0.130833	-16.0738	3.89699e-58	4.42423e-55	TNFSF8	tumor necrosis factor (ligand) superfamily, member 8 [Source:MGI Symbol;Acc:MGI:88328]
ENSMUSG00000069270	25.7016	3.09395	0.193224	16.0123	1.0493e-57	1.12509e-54	HIST1H2AC	histone cluster 1, H2ac [Source:MGI Symbol;Acc:MGI:2448287]
ENSMUSG00000029304	343.559	-2.3743	0.15043	-15.7834	4.04682e-56	4.11072e-53	SPP1	secreted phosphoprotein 1 [Source:MGI Symbol;Acc:MGI:98389]
ENSMUSG00000021719	102.266	1.86397	0.120214	15.5055	3.18656e-54	3.07503e-51	RGS7BP	regulator of G-protein signalling 7 binding protein [Source:MGI Symbol;Acc:MGI:106334]
ENSMUSG00000051627	239.32	1.5095	0.100796	14.9758	1.05713e-50	9.7155e-48	HIST1H1E	histone cluster 1, H1e [Source:MGI Symbol;Acc:MGI:1931527]
ENSMUSG00000004707	905.75	-1.44374	0.0974367	-14.8172	1.13484e-49	9.95562e-47	LY9	lymphocyte antigen 9 [Source:MGI Symbol;Acc:MGI:96885]
ENSMUSG00000091405	95.9371	2.54562	0.171868	14.8115	1.2344e-49	1.03582e-46	HIST2H4	histone cluster 2, H4 [Source:MGI Symbol;Acc:MGI:2140113]
ENSMUSG00000033467	576.567	-1.58904	0.108559	-14.6375	1.61828e-48	1.24931e-45	CRLF2	cytokine receptor-like factor 2 [Source:MGI Symbol;Acc:MGI:1889506]
ENSMUSG00000052684	4688.47	2.09124	0.142864	14.6379	1.60866e-48	1.24931e-45	JUN	jun proto-oncogene [Source:MGI Symbol;Acc:MGI:96646]
ENSMUSG00000033350	195.783	-2.04912	0.140218	-14.6138	2.29338e-48	1.70239e-45	CHST2	carbohydrate sulfotransferase 2 [Source:MGI Symbol;Acc:MGI:1891160]
ENSMUSG00000030577	404.146	-1.65443	0.113299	-14.6023	2.71564e-48	1.94118e-45	CD22	CD22 antigen [Source:MGI Symbol;Acc:MGI:88322]
ENSMUSG00000044786	3800.53	1.54973	0.108255	14.3155	1.75119e-46	1.20707e-43	ZFP36	zinc finger protein 36 [Source:MGI Symbol;Acc:MGI:99180]
ENSMUSG00000015843	97.3013	-2.47284	0.172952	-14.2979	2.25651e-46	1.50175e-43	RXRG	retinoid X receptor gamma [Source:MGI Symbol;Acc:MGI:98216]
ENSMUSG00000055319	790.512	0.921763	0.0655566	14.0606	6.63435e-45	4.2681e-42	SEC23IP	Sec23 interacting protein [Source:MGI Symbol;Acc:MGI:2450915]
ENSMUSG00000029322	89.4947	2.6401	0.189045	13.9654	2.53315e-44	1.57709e-41	PLAC8	placenta-specific 8 [Source:MGI Symbol;Acc:MGI:2445289]
ENSMUSG00000104918	383.812	-1.1152	0.0802731	-13.8926	7.02383e-44	4.23625e-41	GM42944	predicted gene 42944 [Source:MGI Symbol;Acc:MGI:5663081]
ENSMUSG00000060678	46.9129	2.41879	0.174418	13.8678	9.93113e-44	5.80821e-41	HIST1H4C	histone cluster 1, H4c [Source:MGI Symbol;Acc:MGI:2448421]
ENSMUSG00000036181	567.284	1.74467	0.125927	13.8546	1.19358e-43	6.77531e-41	HIST1H1C	histone cluster 1, H1c [Source:MGI Symbol;Acc:MGI:1931526]
ENSMUSG00000031497	257.912	-1.4359	0.10541	-13.622	2.96367e-42	1.63425e-39	TNFSF13B	tumor necrosis factor (ligand) superfamily, member 13b [Source:MGI Symbol;Acc:MGI:1344376]
ENSMUSG00000060034	41.8472	2.16442	0.159398	13.5787	5.35782e-42	2.87239e-39	CTF2	cardiotrophin 2 [Source:MGI Symbol;Acc:MGI:2684607]
ENSMUSG00000024190	472.589	2.42468	0.178777	13.5626	6.6736e-42	3.48109e-39	DUSP1	dual specificity phosphatase 1 [Source:MGI Symbol;Acc:MGI:105120]
ENSMUSG00000073555	124.248	-1.92871	0.143966	-13.397	6.29539e-41	3.1974e-38	GM4951	predicted gene 4951 [Source:MGI Symbol;Acc:MGI:3644953]
ENSMUSG00000030214	168.301	2.26965	0.169644	13.3789	8.03004e-41	3.97384e-38	PLBD1	phospholipase B domain containing 1 [Source:MGI Symbol;Acc:MGI:1914107]
ENSMUSG00000003418	524.763	-1.86726	0.140037	-13.334	1.46822e-40	7.08416e-38	ST8SIA6	ST8 alpha-N-acetyl-neuraminide alpha-2,8-sialyltransferase 6 [Source:MGI Symbol;Acc:MGI:2386797]
ENSMUSG00000102380	61.3003	2.45063	0.184497	13.2828	2.91482e-40	1.3721e-37	GM38140	predicted gene, 38140 [Source:MGI Symbol;Acc:MGI:5611368]
ENSMUSG00000068129	267.492	-1.76382	0.13332	-13.23	5.89141e-40	2.70724e-37	CST7	cystatin F (leukocystatin) [Source:MGI Symbol;Acc:MGI:1298217]
ENSMUSG00000022505	146.712	-2.25389	0.172304	-13.0809	4.23236e-39	1.89964e-36	EMP2	epithelial membrane protein 2 [Source:MGI Symbol;Acc:MGI:1098726]
ENSMUSG00000047238	100.16	-2.20378	0.173705	-12.6869	6.99201e-37	3.06695e-34	MAGEH1	melanoma antigen, family H, 1 [Source:MGI Symbol;Acc:MGI:1922875]
ENSMUSG00000099021	1105.91	2.24885	0.177581	12.6638	9.38292e-37	4.02423e-34	RN7S1	7S RNA 1 [Source:MGI Symbol;Acc:MGI:97950]
ENSMUSG00000051652	6427.39	-0.575122	0.0455335	-12.6308	1.42897e-36	5.99548e-34	LRRC3	leucine rich repeat containing 3 [Source:MGI Symbol;Acc:MGI:2447899]
ENSMUSG00000054364	4500.5	0.845547	0.066962	12.6273	1.49399e-36	6.13487e-34	RHOB	ras homolog family member B [Source:MGI Symbol;Acc:MGI:107949]
ENSMUSG00000026303	1485.58	-0.768826	0.0608946	-12.6255	1.52736e-36	6.14124e-34	MLPH	melanophilin [Source:MGI Symbol;Acc:MGI:2176380]
ENSMUSG00000001128	58.9793	2.01217	0.159433	12.6208	1.62179e-36	6.38788e-34	CFP	complement factor properdin [Source:MGI Symbol;Acc:MGI:97545]
ENSMUSG00000033880	4011.4	-1.11944	0.0890772	-12.5671	3.2044e-36	1.2369e-33	LGALS3BP	lectin, galactoside-binding, soluble, 3 binding protein [Source:MGI Symbol;Acc:MGI:99554]
ENSMUSG00000021728	54.9357	2.38001	0.191275	12.4429	1.52841e-35	5.78398e-33	EMB	embigin [Source:MGI Symbol;Acc:MGI:95321]
ENSMUSG00000021250	144.479	2.40412	0.193492	12.4249	1.91479e-35	7.10682e-33	FOS	FBJ osteosarcoma oncogene [Source:MGI Symbol;Acc:MGI:95574]
ENSMUSG00000063253	5284.33	0.606022	0.0488755	12.3993	2.63649e-35	9.6008e-33	SCOC	short coiled-coil protein [Source:MGI Symbol;Acc:MGI:1927654]
ENSMUSG00000050370	76.3047	-2.3206	0.18725	-12.3931	2.84858e-35	1.0181e-32	CH25H	cholesterol 25-hydroxylase [Source:MGI Symbol;Acc:MGI:1333869]
ENSMUSG00000064220	356.189	2.18226	0.176771	12.3451	5.17394e-35	1.81558e-32	HIST2H2AA1	histone cluster 2, H2aa1 [Source:MGI Symbol;Acc:MGI:96097]
ENSMUSG00000027962	417.102	-1.54519	0.125578	-12.3046	8.55949e-35	2.89821e-32	VCAM1	vascular cell adhesion molecule 1 [Source:MGI Symbol;Acc:MGI:98926]
ENSMUSG00000089827	53.4786	2.33883	0.190059	12.3058	8.42762e-35	2.89821e-32	1700023H06RIK	RIKEN cDNA 1700023H06 gene [Source:MGI Symbol;Acc:MGI:1916692]
ENSMUSG00000030757	82.963	-2.17788	0.178282	-12.216	2.55459e-34	8.5006e-32	ZKSCAN2	zinc finger with KRAB and SCAN domains 2 [Source:MGI Symbol;Acc:MGI:2444060]
ENSMUSG00000038393	7138.48	0.638428	0.0523441	12.1968	3.2347e-34	1.05813e-31	TXNIP	thioredoxin interacting protein [Source:MGI Symbol;Acc:MGI:1889549]
ENSMUSG00000035283	893.806	1.49952	0.1232	12.1714	4.415e-34	1.42016e-31	ADRB1	adrenergic receptor, beta 1 [Source:MGI Symbol;Acc:MGI:87937]
ENSMUSG00000094777	301.835	1.27009	0.104422	12.163	4.89418e-34	1.54849e-31	HIST1H2AP	histone cluster 1, H2ap [Source:MGI Symbol;Acc:MGI:3710573]
ENSMUSG00000070392	165.174	1.84974	0.152569	12.124	7.88091e-34	2.45325e-31	GM20634	predicted gene 20634 [Source:MGI Symbol;Acc:MGI:5313081]
ENSMUSG00000001020	31.9404	2.32022	0.192736	12.0383	2.23516e-33	6.84738e-31	S100A4	S100 calcium binding protein A4 [Source:MGI Symbol;Acc:MGI:1330282]
ENSMUSG00000026051	26.5245	2.33396	0.193972	12.0325	2.39825e-33	7.23224e-31	1500015O10RIK	RIKEN cDNA 1500015O10 gene [Source:MGI Symbol;Acc:MGI:1926146]
ENSMUSG00000015568	801.611	-1.28984	0.107416	-12.0078	3.23178e-33	9.59589e-31	LPL	lipoprotein lipase [Source:MGI Symbol;Acc:MGI:96820]
ENSMUSG00000073418	536.356	-1.5076	0.125837	-11.9806	4.49098e-33	1.31327e-30	C4B	complement component 4B (Chido blood group) [Source:MGI Symbol;Acc:MGI:88228]
ENSMUSG00000027995	3548.77	-0.649673	0.0543298	-11.958	5.89961e-33	1.69944e-30	TLR2	toll-like receptor 2 [Source:MGI Symbol;Acc:MGI:1346060]
ENSMUSG00000073411	16664.8	-0.967422	0.0809324	-11.9535	6.22773e-33	1.76758e-30	H2-D1	histocompatibility 2, D region locus 1 [Source:MGI Symbol;Acc:MGI:95896]
ENSMUSG00000019970	11015.6	1.05935	0.088665	11.9478	6.66562e-33	1.86444e-30	SGK1	serum/glucocorticoid regulated kinase 1 [Source:MGI Symbol;Acc:MGI:1340062]
ENSMUSG00000061232	6299.3	-0.848969	0.071137	-11.9343	7.8445e-33	2.16284e-30	H2-K1	histocompatibility 2, K1, K region [Source:MGI Symbol;Acc:MGI:95904]
ENSMUSG00000026358	604.428	1.80071	0.150985	11.9264	8.62337e-33	2.3441e-30	RGS1	regulator of G-protein signaling 1 [Source:MGI Symbol;Acc:MGI:1354694]
ENSMUSG00000019122	2379.18	1.15506	0.0984656	11.7306	8.88414e-32	2.38144e-29	CCL9	chemokine (C-C motif) ligand 9 [Source:MGI Symbol;Acc:MGI:104533]
ENSMUSG00000096010	68.5589	2.25942	0.192746	11.7222	9.80442e-32	2.59213e-29	HIST4H4	histone cluster 4, H4 [Source:MGI Symbol;Acc:MGI:2448443]
ENSMUSG00000018920	1580.74	-0.759771	0.0648962	-11.7075	1.16696e-31	3.04356e-29	CXCL16	chemokine (C-X-C motif) ligand 16 [Source:MGI Symbol;Acc:MGI:1932682]
ENSMUSG00000062545	1400.88	-1.02766	0.0879296	-11.6873	1.48072e-31	3.81037e-29	TLR12	toll-like receptor 12 [Source:MGI Symbol;Acc:MGI:3045221]
ENSMUSG00000058385	71.2623	1.814	0.155235	11.6855	1.51168e-31	3.83887e-29	HIST1H2BG	histone cluster 1, H2bg [Source:MGI Symbol;Acc:MGI:2448386]
ENSMUSG00000028927	1552.59	-0.812868	0.0698602	-11.6356	2.7153e-31	6.71864e-29	PADI2	peptidyl arginine deiminase, type II [Source:MGI Symbol;Acc:MGI:1338892]
ENSMUSG00000091993	50.7207	1.98102	0.17025	11.6359	2.70616e-31	6.71864e-29	B930036N10RIK	RIKEN cDNA B930036N10 gene [Source:MGI Symbol;Acc:MGI:3702496]
ENSMUSG00000065251	78.7103	2.22534	0.193848	11.4798	1.66619e-30	4.07056e-28	GM23971	predicted gene, 23971 [Source:MGI Symbol;Acc:MGI:5453748]
ENSMUSG00000025743	2205.26	-1.30862	0.114313	-11.4476	2.41621e-30	5.8291e-28	SDC3	syndecan 3 [Source:MGI Symbol;Acc:MGI:1349163]
ENSMUSG00000052565	26.7825	2.2028	0.194245	11.3403	8.28176e-30	1.96735e-27	HIST1H1D	histone cluster 1, H1d [Source:MGI Symbol;Acc:MGI:107502]
ENSMUSG00000053318	510.498	-0.863196	0.0761227	-11.3395	8.35871e-30	1.96735e-27	SLAMF8	SLAM family member 8 [Source:MGI Symbol;Acc:MGI:1921998]
ENSMUSG00000026285	263.842	-1.80255	0.159567	-11.2965	1.36547e-29	3.17514e-27	PDCD1	programmed cell death 1 [Source:MGI Symbol;Acc:MGI:104879]
ENSMUSG00000020811	382.028	-1.23166	0.109596	-11.2382	2.64791e-29	6.08388e-27	WSCD1	WSC domain containing 1 [Source:MGI Symbol;Acc:MGI:2448493]
ENSMUSG00000001025	76.8919	2.17774	0.194112	11.219	3.29025e-29	7.47081e-27	S100A6	S100 calcium binding protein A6 (calcyclin) [Source:MGI Symbol;Acc:MGI:1339467]
ENSMUSG00000031210	1509.91	1.35715	0.122977	11.0358	2.56615e-28	5.75892e-26	GPR165	G protein-coupled receptor 165 [Source:MGI Symbol;Acc:MGI:1923456]
ENSMUSG00000053560	786.585	1.92232	0.176271	10.9055	1.08547e-27	2.40799e-25	IER2	immediate early response 2 [Source:MGI Symbol;Acc:MGI:104815]
ENSMUSG00000098641	30.6739	2.08217	0.192936	10.7921	3.75237e-27	7.95832e-25	RNU3B4	U3B small nuclear RNA 4 [Source:MGI Symbol;Acc:MGI:97988]
ENSMUSG00000098925	30.6739	2.08217	0.192936	10.7921	3.75237e-27	7.95832e-25	RNU3B2	U3B small nuclear RNA 2 [Source:MGI Symbol;Acc:MGI:97986]
ENSMUSG00000104856	30.6739	2.08217	0.192936	10.7921	3.75237e-27	7.95832e-25	RNU3B3	U3B small nuclear RNA 3 [Source:MGI Symbol;Acc:MGI:97987]
ENSMUSG00000105025	30.6739	2.08217	0.192936	10.7921	3.75237e-27	7.95832e-25	RNU3B1	U3B small nuclear RNA 1 [Source:MGI Symbol;Acc:MGI:97985]
ENSMUSG00000009214	400.029	-1.16745	0.108255	-10.7843	4.08321e-27	8.56586e-25	TMEM8C	transmembrane protein 8C [Source:MGI Symbol;Acc:MGI:1913389]
ENSMUSG00000093577	107.366	1.72702	0.160181	10.7817	4.20148e-27	8.71919e-25	GM20632	predicted gene 20632 [Source:MGI Symbol;Acc:MGI:5313079]
ENSMUSG00000037032	195.635	-1.09658	0.102275	-10.7219	8.03418e-27	1.64957e-24	APBB1	amyloid beta (A4) precursor protein-binding, family B, member 1 [Source:MGI Symbol;Acc:MGI:107765]
ENSMUSG00000034641	72.8949	1.92214	0.180324	10.6594	1.57612e-26	3.202e-24	CD300LD	CD300 molecule like family member d [Source:MGI Symbol;Acc:MGI:2442358]
ENSMUSG00000068036	148.364	-1.65998	0.159394	-10.4144	2.13226e-25	4.28674e-23	AFDN	afadin, adherens junction formation factor [Source:MGI Symbol;Acc:MGI:1314653]
ENSMUSG00000029561	265.409	-1.46339	0.140664	-10.4034	2.39155e-25	4.75845e-23	OASL2	2'-5' oligoadenylate synthetase-like 2 [Source:MGI Symbol;Acc:MGI:1344390]
ENSMUSG00000002204	61.869	1.96748	0.190008	10.3548	3.98154e-25	7.8412e-23	NAPSA	napsin A aspartic peptidase [Source:MGI Symbol;Acc:MGI:109365]
ENSMUSG00000025092	128.523	-1.3369	0.130142	-10.2727	9.35848e-25	1.82443e-22	HSPA12A	heat shock protein 12A [Source:MGI Symbol;Acc:MGI:1920692]
ENSMUSG00000048126	517.005	-1.73966	0.169858	-10.2419	1.28701e-24	2.48393e-22	COL6A3	collagen, type VI, alpha 3 [Source:MGI Symbol;Acc:MGI:88461]
ENSMUSG00000089797	131.936	-1.16268	0.114318	-10.1706	2.68348e-24	5.12783e-22	GM16118	predicted gene 16118 [Source:MGI Symbol;Acc:MGI:3801926]
ENSMUSG00000006360	115.844	1.62563	0.159892	10.167	2.7833e-24	5.26643e-22	CRIP1	cysteine-rich protein 1 (intestinal) [Source:MGI Symbol;Acc:MGI:88501]
ENSMUSG00000016559	12375.9	0.733945	0.0722095	10.1641	2.86734e-24	5.37278e-22	H3F3B	H3 histone, family 3B [Source:MGI Symbol;Acc:MGI:1101768]
ENSMUSG00000061482	101.662	1.33497	0.131382	10.161	2.95961e-24	5.49235e-22	HIST1H4D	histone cluster 1, H4d [Source:MGI Symbol;Acc:MGI:2448423]
ENSMUSG00000064343	97.5692	1.80386	0.177733	10.1493	3.33815e-24	6.13585e-22	MT-TQ	mitochondrially encoded tRNA glutamine [Source:MGI Symbol;Acc:MGI:102477]
ENSMUSG00000106147	15.8837	1.96742	0.194081	10.1371	3.78227e-24	6.88659e-22	RNU3A	U3A small nuclear RNA [Source:MGI Symbol;Acc:MGI:97977]
ENSMUSG00000074896	397.07	-1.35047	0.13348	-10.1174	4.62727e-24	8.34639e-22	IFIT3	interferon-induced protein with tetratricopeptide repeats 3 [Source:MGI Symbol;Acc:MGI:1101055]
ENSMUSG00000060981	23.845	1.89046	0.187324	10.0919	6.00007e-24	1.07223e-21	HIST1H4H	histone cluster 1, H4h [Source:MGI Symbol;Acc:MGI:2448427]
ENSMUSG00000022887	72.5646	-1.4022	0.139003	-10.0876	6.27123e-24	1.11041e-21	MASP1	mannan-binding lectin serine peptidase 1 [Source:MGI Symbol;Acc:MGI:88492]
ENSMUSG00000020423	4530.05	0.892693	0.0887704	10.0562	8.62615e-24	1.5135e-21	BTG2	B cell translocation gene 2, anti-proliferative [Source:MGI Symbol;Acc:MGI:108384]
ENSMUSG00000056708	2506.33	0.771073	0.0766957	10.0537	8.85027e-24	1.53883e-21	IER5	immediate early response 5 [Source:MGI Symbol;Acc:MGI:1337072]
ENSMUSG00000049103	321.939	1.36392	0.1363	10.0068	1.42327e-23	2.4526e-21	CCR2	chemokine (C-C motif) receptor 2 [Source:MGI Symbol;Acc:MGI:106185]
ENSMUSG00000072596	40.8943	1.82639	0.18375	9.93959	2.79989e-23	4.78211e-21	EAR2	eosinophil-associated, ribonuclease A family, member 2 [Source:MGI Symbol;Acc:MGI:108020]
ENSMUSG00000064945	12.5051	1.91179	0.19241	9.93603	2.90164e-23	4.91243e-21	RNY3	RNA, Y3 small cytoplasmic (associated with Ro protein) [Source:MGI Symbol;Acc:MGI:107304]
ENSMUSG00000036533	363.191	-0.821984	0.0828111	-9.92601	3.2083e-23	5.38437e-21	CDC42EP3	CDC42 effector protein (Rho GTPase binding) 3 [Source:MGI Symbol;Acc:MGI:2384718]
ENSMUSG00000002058	20.7058	1.91073	0.193357	9.88187	4.98953e-23	8.30155e-21	UNC119	unc-119 lipid binding chaperone [Source:MGI Symbol;Acc:MGI:1328357]
ENSMUSG00000040907	340.166	-1.22491	0.124183	-9.86372	5.97912e-23	9.863e-21	ATP1A3	ATPase, Na+/K+ transporting, alpha 3 polypeptide [Source:MGI Symbol;Acc:MGI:88107]
ENSMUSG00000027221	774.431	-1.11318	0.113132	-9.8396	7.60146e-23	1.24329e-20	CHST1	carbohydrate (keratan sulfate Gal-6) sulfotransferase 1 [Source:MGI Symbol;Acc:MGI:1924219]
ENSMUSG00000045087	18.4713	1.83947	0.187056	9.83379	8.05261e-23	1.30601e-20	S1PR5	sphingosine-1-phosphate receptor 5 [Source:MGI Symbol;Acc:MGI:2150641]
ENSMUSG00000071076	1755.48	0.76984	0.078335	9.82753	8.56943e-23	1.37825e-20	JUND	jun D proto-oncogene [Source:MGI Symbol;Acc:MGI:96648]
ENSMUSG00000038034	1450	-0.662553	0.0677288	-9.78244	1.33941e-22	2.13642e-20	IGSF8	immunoglobulin superfamily, member 8 [Source:MGI Symbol;Acc:MGI:2154090]
ENSMUSG00000080542	20.5104	1.89049	0.193605	9.76468	1.59618e-22	2.5251e-20	GM22710	predicted gene, 22710 [Source:MGI Symbol;Acc:MGI:5452487]
ENSMUSG00000104187	22.3343	1.89336	0.194085	9.75531	1.75061e-22	2.74689e-20	GM37820	predicted gene, 37820 [Source:MGI Symbol;Acc:MGI:5611048]
ENSMUSG00000060131	21.379	1.87846	0.193407	9.71248	2.6676e-22	4.15199e-20	ATP8B4	ATPase, class I, type 8B, member 4 [Source:MGI Symbol;Acc:MGI:1859664]
ENSMUSG00000041754	24.9471	1.87523	0.193553	9.68843	3.37672e-22	5.21365e-20	TREM3	triggering receptor expressed on myeloid cells 3 [Source:MGI Symbol;Acc:MGI:1930003]
ENSMUSG00000002985	20244.3	-0.899412	0.092895	-9.68203	3.595e-22	5.50662e-20	APOE	apolipoprotein E [Source:MGI Symbol;Acc:MGI:88057]
ENSMUSG00000048534	15.0928	1.82572	0.189129	9.6533	4.75967e-22	7.2332e-20	JAML	junction adhesion molecule like [Source:MGI Symbol;Acc:MGI:2685484]
ENSMUSG00000028645	1000.78	-0.622515	0.0647728	-9.61075	7.20201e-22	1.07751e-19	SLC2A1	solute carrier family 2 (facilitated glucose transporter), member 1 [Source:MGI Symbol;Acc:MGI:95755]
ENSMUSG00000014599	543.268	-1.12384	0.117079	-9.59902	8.07119e-22	1.19826e-19	CSF1	colony stimulating factor 1 (macrophage) [Source:MGI Symbol;Acc:MGI:1339753]
ENSMUSG00000079436	21.1697	1.86287	0.194275	9.58882	8.90972e-22	1.31265e-19	KCNJ13	potassium inwardly-rectifying channel, subfamily J, member 13 [Source:MGI Symbol;Acc:MGI:3781032]
ENSMUSG00000065037	157.945	1.51149	0.158084	9.56134	1.16247e-21	1.69967e-19	RN7SK	RNA, 7SK, nuclear [Source:MGI Symbol;Acc:MGI:103186]
ENSMUSG00000090101	53.1382	1.56603	0.163859	9.55719	1.21001e-21	1.75588e-19	SNHG9	small nucleolar RNA host gene 9 [Source:MGI Symbol;Acc:MGI:1920724]
ENSMUSG00000100210	11.4934	1.80947	0.189382	9.55462	1.24035e-21	1.78648e-19	HIST1H3F	histone cluster 1, H3f [Source:MGI Symbol;Acc:MGI:2448329]
ENSMUSG00000024044	469.385	-1.01114	0.105924	-9.54593	1.34897e-21	1.92853e-19	EPB41L3	erythrocyte membrane protein band 4.1 like 3 [Source:MGI Symbol;Acc:MGI:103008]
ENSMUSG00000029598	1608.94	-0.725784	0.0763445	-9.5067	1.96815e-21	2.79303e-19	PLBD2	phospholipase B domain containing 2 [Source:MGI Symbol;Acc:MGI:1919022]
ENSMUSG00000074807	100.385	1.00075	0.105637	9.47353	2.70548e-21	3.81137e-19	GM10762	predicted gene 10762 [Source:MGI Symbol;Acc:MGI:3704209]
ENSMUSG00000000594	3804.59	-0.558078	0.0589985	-9.4592	3.10321e-21	4.33999e-19	GM2A	GM2 ganglioside activator protein [Source:MGI Symbol;Acc:MGI:95762]
ENSMUSG00000023034	103.584	1.62588	0.171947	9.4557	3.20875e-21	4.45531e-19	NR4A1	nuclear receptor subfamily 4, group A, member 1 [Source:MGI Symbol;Acc:MGI:1352454]
ENSMUSG00000020083	21.6457	-1.73137	0.184079	-9.4056	5.17325e-21	7.13169e-19	2010107G23RIK	RIKEN cDNA 2010107G23 gene [Source:MGI Symbol;Acc:MGI:1917144]
ENSMUSG00000093656	41.7934	1.81671	0.193205	9.40297	5.30432e-21	7.26053e-19	GM20628	predicted gene 20628 [Source:MGI Symbol;Acc:MGI:5313075]
ENSMUSG00000039899	548.199	-0.976985	0.104024	-9.39192	5.89182e-21	8.00789e-19	FGL2	fibrinogen-like protein 2 [Source:MGI Symbol;Acc:MGI:103266]
ENSMUSG00000053101	24.6165	1.76509	0.18864	9.35691	8.2101e-21	1.10808e-18	GPR141	G protein-coupled receptor 141 [Source:MGI Symbol;Acc:MGI:2672983]
ENSMUSG00000030789	212.944	-1.15253	0.123263	-9.35013	8.75439e-21	1.17333e-18	ITGAX	integrin alpha X [Source:MGI Symbol;Acc:MGI:96609]
ENSMUSG00000040537	104.65	-1.50504	0.161094	-9.34263	9.39747e-21	1.25084e-18	ADAM22	a disintegrin and metallopeptidase domain 22 [Source:MGI Symbol;Acc:MGI:1340046]
ENSMUSG00000038623	4024.42	0.444829	0.0477721	9.31149	1.26052e-20	1.6663e-18	TM6SF1	transmembrane 6 superfamily member 1 [Source:MGI Symbol;Acc:MGI:1933209]
ENSMUSG00000021411	567.956	-0.624161	0.0670694	-9.3062	1.32487e-20	1.73945e-18	PXDC1	PX domain containing 1 [Source:MGI Symbol;Acc:MGI:1914145]
ENSMUSG00000032076	2834.37	-0.638903	0.0690112	-9.25795	2.08393e-20	2.71755e-18	CADM1	cell adhesion molecule 1 [Source:MGI Symbol;Acc:MGI:1889272]
ENSMUSG00000063234	3064.72	-0.825781	0.0892114	-9.25645	2.11341e-20	2.73751e-18	GPR84	G protein-coupled receptor 84 [Source:MGI Symbol;Acc:MGI:1934129]
ENSMUSG00000027712	753.185	-0.870387	0.0941075	-9.24886	2.269e-20	2.91944e-18	ANXA5	annexin A5 [Source:MGI Symbol;Acc:MGI:106008]
ENSMUSG00000040435	574.108	0.996731	0.107781	9.24774	2.29286e-20	2.93061e-18	PPP1R15A	protein phosphatase 1, regulatory (inhibitor) subunit 15A [Source:MGI Symbol;Acc:MGI:1927072]
ENSMUSG00000106001	267.894	1.79636	0.194511	9.23528	2.57613e-20	3.27101e-18	GM42826	predicted gene 42826 [Source:MGI Symbol;Acc:MGI:5662963]
ENSMUSG00000064702	49.8551	1.76361	0.191927	9.18893	3.9676e-20	4.9403e-18	GM24950	predicted gene, 24950 [Source:MGI Symbol;Acc:MGI:5454727]
ENSMUSG00000065767	49.8551	1.76361	0.191927	9.18893	3.9676e-20	4.9403e-18	GM23849	predicted gene, 23849 [Source:MGI Symbol;Acc:MGI:5453626]
ENSMUSG00000065944	49.8551	1.76361	0.191927	9.18893	3.9676e-20	4.9403e-18	RNU2-10	U2 small nuclear RNA 10 [Source:MGI Symbol;Acc:MGI:97976]
ENSMUSG00000041695	600.372	-1.03727	0.113017	-9.17805	4.38951e-20	5.43061e-18	KCNJ2	potassium inwardly-rectifying channel, subfamily J, member 2 [Source:MGI Symbol;Acc:MGI:104744]
ENSMUSG00000022122	44.7456	1.65216	0.180034	9.17695	4.43492e-20	5.45184e-18	EDNRB	endothelin receptor type B [Source:MGI Symbol;Acc:MGI:102720]
ENSMUSG00000043794	58.0104	1.40848	0.153643	9.16726	4.85216e-20	5.92701e-18	D830025C05RIK	RIKEN cDNA D830025C05 gene [Source:MGI Symbol;Acc:MGI:3698180]
ENSMUSG00000052837	4475.69	1.04073	0.113565	9.16417	4.99276e-20	6.06039e-18	JUNB	jun B proto-oncogene [Source:MGI Symbol;Acc:MGI:96647]
ENSMUSG00000042734	231.353	-0.80889	0.0884031	-9.15001	5.69273e-20	6.82421e-18	TTC9	tetratricopeptide repeat domain 9 [Source:MGI Symbol;Acc:MGI:1916730]
ENSMUSG00000065145	15.2734	1.77727	0.194231	9.15029	5.67813e-20	6.82421e-18	VAULTRC5	vault RNA component 5 [Source:MGI Symbol;Acc:MGI:2673990]
ENSMUSG00000027457	215.601	-1.1841	0.129663	-9.13211	6.718e-20	8.00354e-18	SNPH	syntaphilin [Source:MGI Symbol;Acc:MGI:2139270]
ENSMUSG00000023349	34.3694	1.73618	0.190407	9.11823	7.63594e-20	9.04133e-18	CLEC4N	C-type lectin domain family 4, member n [Source:MGI Symbol;Acc:MGI:1861231]
ENSMUSG00000020695	887.062	-0.965501	0.10607	-9.10246	8.83078e-20	1.03923e-17	MRC2	mannose receptor, C type 2 [Source:MGI Symbol;Acc:MGI:107818]
ENSMUSG00000002885	106.471	1.76491	0.194118	9.09192	9.73068e-20	1.13819e-17	ADGRE5	adhesion G protein-coupled receptor E5 [Source:MGI Symbol;Acc:MGI:1347095]
ENSMUSG00000036904	139.053	-1.00832	0.11168	-9.02864	1.73814e-19	2.00875e-17	FZD8	frizzled class receptor 8 [Source:MGI Symbol;Acc:MGI:108460]
ENSMUSG00000098108	76.5379	-1.4304	0.158427	-9.02879	1.73585e-19	2.00875e-17	GM27008	predicted gene, 27008 [Source:MGI Symbol;Acc:MGI:5504123]
ENSMUSG00000000318	43.4603	1.68896	0.187137	9.02523	1.79321e-19	2.06006e-17	CLEC10A	C-type lectin domain family 10, member A [Source:MGI Symbol;Acc:MGI:96975]
ENSMUSG00000017679	928.263	1.05003	0.116484	9.01438	1.97985e-19	2.26101e-17	TTPAL	tocopherol (alpha) transfer protein-like [Source:MGI Symbol;Acc:MGI:1923330]
ENSMUSG00000022756	75.7114	-1.31748	0.146349	-9.0023	2.2103e-19	2.50934e-17	SLC7A4	solute carrier family 7 (cationic amino acid transporter, y+ system), member 4 [Source:MGI Symbol;Acc:MGI:2146512]
ENSMUSG00000095677	515.773	0.837621	0.093081	8.99884	2.28115e-19	2.57463e-17	DYNLT1F	dynein light chain Tctex-type 1F [Source:MGI Symbol;Acc:MGI:3780996]
ENSMUSG00000036169	9.91177	1.67906	0.186746	8.99113	2.44708e-19	2.74585e-17	SOSTDC1	sclerostin domain containing 1 [Source:MGI Symbol;Acc:MGI:1913292]
ENSMUSG00000020277	1927.73	-0.660642	0.0737902	-8.95297	3.46047e-19	3.83834e-17	PFKL	phosphofructokinase, liver, B-type [Source:MGI Symbol;Acc:MGI:97547]
ENSMUSG00000033082	51.7861	-1.68769	0.188501	-8.95325	3.4517e-19	3.83834e-17	CLEC1A	C-type lectin domain family 1, member a [Source:MGI Symbol;Acc:MGI:2444151]
ENSMUSG00000014158	201.912	-1.1951	0.133518	-8.95087	3.52682e-19	3.88958e-17	TRPV4	transient receptor potential cation channel, subfamily V, member 4 [Source:MGI Symbol;Acc:MGI:1926945]
ENSMUSG00000016256	26874.4	-0.635301	0.0710068	-8.94704	3.65147e-19	4.00417e-17	CTSZ	cathepsin Z [Source:MGI Symbol;Acc:MGI:1891190]
ENSMUSG00000103332	147.385	-1.39231	0.155656	-8.94479	3.72644e-19	4.06329e-17	PCDHGA2	protocadherin gamma subfamily A, 2 [Source:MGI Symbol;Acc:MGI:1935214]
ENSMUSG00000060550	322.787	-1.212	0.135658	-8.93419	4.10155e-19	4.44718e-17	H2-Q7	histocompatibility 2, Q region locus 7 [Source:MGI Symbol;Acc:MGI:95936]
ENSMUSG00000045932	314.123	-1.33058	0.149195	-8.91841	4.73035e-19	5.10033e-17	IFIT2	interferon-induced protein with tetratricopeptide repeats 2 [Source:MGI Symbol;Acc:MGI:99449]
ENSMUSG00000026222	540.458	-0.821823	0.0922909	-8.9047	5.35324e-19	5.73986e-17	SP100	nuclear antigen Sp100 [Source:MGI Symbol;Acc:MGI:109561]
ENSMUSG00000037992	15.421	1.72853	0.194251	8.8984	5.66559e-19	6.0301e-17	RARA	retinoic acid receptor, alpha [Source:MGI Symbol;Acc:MGI:97856]
ENSMUSG00000091418	130.688	1.23023	0.13826	8.898	5.68642e-19	6.0301e-17	GM3164	predicted gene 3164 [Source:MGI Symbol;Acc:MGI:3781343]
ENSMUSG00000066456	130.006	-1.00723	0.11333	-8.88765	6.24163e-19	6.5827e-17	HMGN3	high mobility group nucleosomal binding domain 3 [Source:MGI Symbol;Acc:MGI:2138069]
ENSMUSG00000037266	26028.3	-0.597551	0.0674466	-8.85962	8.02845e-19	8.42115e-17	RSRP1	arginine/serine rich protein 1 [Source:MGI Symbol;Acc:MGI:106498]
ENSMUSG00000026773	1688.39	-0.722023	0.0815955	-8.8488	8.8462e-19	9.22874e-17	PFKFB3	6-phosphofructo-2-kinase/fructose-2,6-biphosphatase 3 [Source:MGI Symbol;Acc:MGI:2181202]
ENSMUSG00000038026	112.861	-1.22898	0.139399	-8.81623	1.18377e-18	1.22832e-16	KCNJ9	potassium inwardly-rectifying channel, subfamily J, member 9 [Source:MGI Symbol;Acc:MGI:108007]
ENSMUSG00000094634	108.635	1.11522	0.127081	8.77564	1.69938e-18	1.7539e-16	GM3468	predicted gene 3468 [Source:MGI Symbol;Acc:MGI:3781644]
ENSMUSG00000069792	83.4595	1.50024	0.171659	8.73968	2.33774e-18	2.39991e-16	WFDC17	WAP four-disulfide core domain 17 [Source:MGI Symbol;Acc:MGI:3649773]
ENSMUSG00000028654	406.969	0.982817	0.112594	8.72888	2.57204e-18	2.62648e-16	MYCL	v-myc avian myelocytomatosis viral oncogene lung carcinoma derived [Source:MGI Symbol;Acc:MGI:96799]
ENSMUSG00000042265	12.951	1.62063	0.186701	8.68037	3.9447e-18	4.00698e-16	TREM1	triggering receptor expressed on myeloid cells 1 [Source:MGI Symbol;Acc:MGI:1930005]
ENSMUSG00000038717	750.814	0.948816	0.109405	8.67249	4.22788e-18	4.27215e-16	ATP5L	ATP synthase, H+ transporting, mitochondrial F0 complex, subunit G [Source:MGI Symbol;Acc:MGI:1351597]
ENSMUSG00000001281	53.599	1.65731	0.191737	8.64367	5.44352e-18	5.47187e-16	ITGB7	integrin beta 7 [Source:MGI Symbol;Acc:MGI:96616]
ENSMUSG00000069265	5.08387	1.62771	0.188484	8.6358	5.83154e-18	5.83154e-16	HIST1H3A	histone cluster 1, H3a [Source:MGI Symbol;Acc:MGI:2668828]
ENSMUSG00000060402	533.923	-0.861421	0.100044	-8.6104	7.28052e-18	7.243e-16	CHST8	carbohydrate (N-acetylgalactosamine 4-0) sulfotransferase 8 [Source:MGI Symbol;Acc:MGI:1916197]
ENSMUSG00000102748	572.537	-1.02029	0.119005	-8.57346	1.00424e-17	9.93941e-16	PCDHGB2	protocadherin gamma subfamily B, 2 [Source:MGI Symbol;Acc:MGI:1935170]
ENSMUSG00000022425	682.585	1.59359	0.18664	8.53832	1.36189e-17	1.32837e-15	ENPP2	ectonucleotide pyrophosphatase/phosphodiesterase 2 [Source:MGI Symbol;Acc:MGI:1321390]
ENSMUSG00000023078	31.1644	-1.62974	0.190861	-8.5389	1.35504e-17	1.32837e-15	CXCL13	chemokine (C-X-C motif) ligand 13 [Source:MGI Symbol;Acc:MGI:1888499]
ENSMUSG00000094655	9.6578	1.61829	0.189534	8.53824	1.36278e-17	1.32837e-15	GM25360	predicted gene, 25360 [Source:MGI Symbol;Acc:MGI:5455137]
ENSMUSG00000100954	153.105	1.26082	0.148014	8.51824	1.62e-17	1.57116e-15	GM10138	predicted gene 10138 [Source:MGI Symbol;Acc:MGI:3708522]
ENSMUSG00000058351	133.993	1.16487	0.136798	8.51522	1.66268e-17	1.60449e-15	SMIM4	small integral membrane protein 4 [Source:MGI Symbol;Acc:MGI:1913737]
ENSMUSG00000047959	106.025	-1.03749	0.122108	-8.49652	1.95367e-17	1.87591e-15	KCNA3	potassium voltage-gated channel, shaker-related subfamily, member 3 [Source:MGI Symbol;Acc:MGI:96660]
ENSMUSG00000042371	126.395	-0.816527	0.0961171	-8.49513	1.97707e-17	1.88898e-15	SLC5A10	solute carrier family 5 (sodium/glucose cotransporter), member 10 [Source:MGI Symbol;Acc:MGI:1926089]
ENSMUSG00000027907	145.442	1.64321	0.193694	8.48352	2.1848e-17	2.067e-15	S100A11	S100 calcium binding protein A11 [Source:MGI Symbol;Acc:MGI:1338798]
ENSMUSG00000039323	22.8364	1.6342	0.192632	8.48353	2.18469e-17	2.067e-15	IGFBP2	insulin-like growth factor binding protein 2 [Source:MGI Symbol;Acc:MGI:96437]
ENSMUSG00000079484	4923.93	0.566473	0.067078	8.445	3.04058e-17	2.8626e-15	PHYHD1	phytanoyl-CoA dioxygenase domain containing 1 [Source:MGI Symbol;Acc:MGI:3612860]
ENSMUSG00000062488	90.8382	-1.35328	0.160585	-8.4272	3.54031e-17	3.3169e-15	IFIT3B	interferon-induced protein with tetratricopeptide repeats 3B [Source:MGI Symbol;Acc:MGI:3698419]
ENSMUSG00000051457	12.6934	1.6115	0.191397	8.41967	3.77531e-17	3.51997e-15	SPN	sialophorin [Source:MGI Symbol;Acc:MGI:98384]
ENSMUSG00000004612	14.1861	1.4988	0.178159	8.41274	4.00558e-17	3.71672e-15	NKG7	natural killer cell group 7 sequence [Source:MGI Symbol;Acc:MGI:1931250]
ENSMUSG00000034855	95.0376	-1.42769	0.169782	-8.40895	4.13705e-17	3.82034e-15	CXCL10	chemokine (C-X-C motif) ligand 10 [Source:MGI Symbol;Acc:MGI:1352450]
ENSMUSG00000021508	25.5818	-1.50393	0.178946	-8.40435	4.30223e-17	3.95396e-15	CXCL14	chemokine (C-X-C motif) ligand 14 [Source:MGI Symbol;Acc:MGI:1888514]
ENSMUSG00000016496	252.064	-0.958719	0.114147	-8.39898	4.50361e-17	4.11942e-15	CD274	CD274 antigen [Source:MGI Symbol;Acc:MGI:1926446]
ENSMUSG00000041117	39.692	1.51676	0.181332	8.36454	6.03509e-17	5.49421e-15	CCDC8	coiled-coil domain containing 8 [Source:MGI Symbol;Acc:MGI:3612184]
ENSMUSG00000064899	6.89431	1.56459	0.187114	8.36171	6.18169e-17	5.60125e-15	SNORD118	small nucleolar RNA, C/D box 118 [Source:MGI Symbol;Acc:MGI:3819519]
ENSMUSG00000103165	15.5731	1.61373	0.193071	8.35823	6.3666e-17	5.74184e-15	GM37560	predicted gene, 37560 [Source:MGI Symbol;Acc:MGI:5610788]
ENSMUSG00000088252	11.4635	1.60122	0.191699	8.3528	6.66648e-17	5.98433e-15	SNORD13	small nucleolar RNA, C/D box 13 [Source:MGI Symbol;Acc:MGI:3819521]
ENSMUSG00000024644	2464.03	-0.580145	0.0697487	-8.31765	8.97267e-17	8.01725e-15	CNDP2	CNDP dipeptidase 2 (metallopeptidase M20 family) [Source:MGI Symbol;Acc:MGI:1913304]
ENSMUSG00000093622	59.2265	1.2772	0.153839	8.30216	1.02233e-16	9.09258e-15	GM20703	predicted gene 20703 [Source:MGI Symbol;Acc:MGI:5313150]
ENSMUSG00000024011	18.5863	1.54436	0.186491	8.28113	1.22015e-16	1.08022e-14	PI16	peptidase inhibitor 16 [Source:MGI Symbol;Acc:MGI:1921366]
ENSMUSG00000100632	62.9612	1.12982	0.136592	8.27149	1.32293e-16	1.16587e-14	9430060I03RIK	RIKEN cDNA 9430060I03 gene [Source:MGI Symbol;Acc:MGI:3702484]
ENSMUSG00000030695	5099.64	-0.463654	0.0560594	-8.27075	1.33116e-16	1.16779e-14	ALDOA	aldolase A, fructose-bisphosphate [Source:MGI Symbol;Acc:MGI:87994]
ENSMUSG00000064023	916.434	-0.579239	0.0701313	-8.25935	1.46464e-16	1.27908e-14	KLK8	kallikrein related-peptidase 8 [Source:MGI Symbol;Acc:MGI:1343327]
ENSMUSG00000061808	930.434	1.51981	0.184733	8.22703	1.91907e-16	1.66838e-14	TTR	transthyretin [Source:MGI Symbol;Acc:MGI:98865]
ENSMUSG00000078122	44.973	1.56246	0.190026	8.22232	1.99604e-16	1.72751e-14	F630028O10RIK	RIKEN cDNA F630028O10 gene [Source:MGI Symbol;Acc:MGI:3641813]
ENSMUSG00000038352	475.736	0.931217	0.113403	8.21159	2.18287e-16	1.88078e-14	ARL5C	ADP-ribosylation factor-like 5C [Source:MGI Symbol;Acc:MGI:3028577]
ENSMUSG00000037820	2047.51	-0.615278	0.0750413	-8.1992	2.41998e-16	2.07581e-14	TGM2	transglutaminase 2, C polypeptide [Source:MGI Symbol;Acc:MGI:98731]
ENSMUSG00000018449	618.517	0.958278	0.116962	8.19304	2.5471e-16	2.17518e-14	RPAIN	RPA interacting protein [Source:MGI Symbol;Acc:MGI:1916973]
ENSMUSG00000028518	54.7861	-1.58975	0.194213	-8.18559	2.70962e-16	2.30377e-14	PRKAA2	protein kinase, AMP-activated, alpha 2 catalytic subunit [Source:MGI Symbol;Acc:MGI:1336173]
ENSMUSG00000070327	452.372	-0.910143	0.11124	-8.18183	2.79574e-16	2.36657e-14	RNF213	ring finger protein 213 [Source:MGI Symbol;Acc:MGI:1289196]
ENSMUSG00000024661	16489.3	-0.602965	0.0738795	-8.16147	3.30983e-16	2.78951e-14	FTH1	ferritin heavy polypeptide 1 [Source:MGI Symbol;Acc:MGI:95588]
ENSMUSG00000026355	320.916	-0.694425	0.0852785	-8.14302	3.85535e-16	3.23514e-14	MCM6	minichromosome maintenance complex component 6 [Source:MGI Symbol;Acc:MGI:1298227]
ENSMUSG00000045968	86.1944	1.18139	0.145337	8.12864	4.34129e-16	3.61151e-14	TEDDM2	transmembrane epididymal family member 2 [Source:MGI Symbol;Acc:MGI:1923273]
ENSMUSG00000074677	32.05	1.56238	0.192196	8.12913	4.3238e-16	3.61151e-14	SIRPB1C	signal-regulatory protein beta 1C [Source:MGI Symbol;Acc:MGI:3807521]
ENSMUSG00000031736	13.6338	1.56216	0.192318	8.12278	4.55626e-16	3.77407e-14	CRNDE	colorectal neoplasia differentially expressed (non-protein coding) [Source:MGI Symbol;Acc:MGI:1918546]
ENSMUSG00000033319	672.549	0.558298	0.068766	8.11881	4.70793e-16	3.88303e-14	FEM1C	fem-1 homolog c (C.elegans) [Source:MGI Symbol;Acc:MGI:2444737]
ENSMUSG00000001588	15.6839	1.50167	0.185667	8.08801	6.06476e-16	4.98085e-14	ACAP1	ArfGAP with coiled-coil, ankyrin repeat and PH domains 1 [Source:MGI Symbol;Acc:MGI:2388270]
ENSMUSG00000097855	23.6692	1.43591	0.177561	8.08689	6.12072e-16	5.0055e-14	A930007I19RIK	RIKEN cDNA A930007I19 gene [Source:MGI Symbol;Acc:MGI:1925029]
ENSMUSG00000030107	239.621	-1.19932	0.148753	-8.06251	7.47424e-16	6.08661e-14	USP18	ubiquitin specific peptidase 18 [Source:MGI Symbol;Acc:MGI:1344364]
ENSMUSG00000020108	283.647	1.56303	0.193966	8.0583	7.73644e-16	6.27366e-14	DDIT4	DNA-damage-inducible transcript 4 [Source:MGI Symbol;Acc:MGI:1921997]
ENSMUSG00000027698	396.219	-0.765609	0.0952999	-8.03369	9.4587e-16	7.6382e-14	NCEH1	neutral cholesterol ester hydrolase 1 [Source:MGI Symbol;Acc:MGI:2443191]
ENSMUSG00000054945	54.6876	-1.09522	0.136634	-8.01566	1.09545e-15	8.80925e-14	GM9958	predicted gene 9958 [Source:MGI Symbol;Acc:MGI:3641866]
ENSMUSG00000021939	66044.7	-0.459325	0.0573722	-8.00606	1.18442e-15	9.48523e-14	CTSB	cathepsin B [Source:MGI Symbol;Acc:MGI:88561]
ENSMUSG00000030824	5551.77	-0.445972	0.0557273	-8.00275	1.21669e-15	9.70338e-14	NUCB1	nucleobindin 1 [Source:MGI Symbol;Acc:MGI:97388]
ENSMUSG00000030148	1039.95	0.387457	0.0485776	7.97605	1.51097e-15	1.20007e-13	CLEC4A2	C-type lectin domain family 4, member a2 [Source:MGI Symbol;Acc:MGI:1349412]
ENSMUSG00000030653	1635.26	-1.41768	0.177758	-7.97535	1.51946e-15	1.20187e-13	GM45837	predicted gene 45837 [Source:MGI Symbol;Acc:MGI:5804952]
ENSMUSG00000031722	95.5769	1.46635	0.184124	7.96393	1.66661e-15	1.31288e-13	HP	haptoglobin [Source:MGI Symbol;Acc:MGI:96211]
ENSMUSG00000028976	14931.2	-0.493066	0.0619486	-7.95927	1.73056e-15	1.35772e-13	SLC2A5	solute carrier family 2 (facilitated glucose transporter), member 5 [Source:MGI Symbol;Acc:MGI:1928369]
ENSMUSG00000032679	13.7081	1.53487	0.192926	7.95575	1.7805e-15	1.39124e-13	CD59A	CD59a antigen [Source:MGI Symbol;Acc:MGI:109177]
ENSMUSG00000098188	2382.78	-0.403815	0.0507924	-7.9503	1.8606e-15	1.44796e-13	SOWAHC	sosondowah ankyrin repeat domain family member C [Source:MGI Symbol;Acc:MGI:3606051]
ENSMUSG00000030605	471.123	-0.672788	0.0847853	-7.9352	2.10158e-15	1.62894e-13	MFGE8	milk fat globule-EGF factor 8 protein [Source:MGI Symbol;Acc:MGI:102768]
ENSMUSG00000104713	38.125	-1.42489	0.179862	-7.92215	2.33431e-15	1.80209e-13	GBP6	guanylate binding protein 6 [Source:MGI Symbol;Acc:MGI:2140937]
ENSMUSG00000001827	13.1046	1.49325	0.189147	7.89466	2.91097e-15	2.23832e-13	FOLR1	folate receptor 1 (adult) [Source:MGI Symbol;Acc:MGI:95568]
ENSMUSG00000020681	50.6723	1.38662	0.175668	7.89341	2.9403e-15	2.2519e-13	ACE	angiotensin I converting enzyme (peptidyl-dipeptidase A) 1 [Source:MGI Symbol;Acc:MGI:87874]
ENSMUSG00000030538	767.119	0.522598	0.066329	7.87887	3.3035e-15	2.52006e-13	CIB1	calcium and integrin binding 1 (calmyrin) [Source:MGI Symbol;Acc:MGI:1344418]
ENSMUSG00000099250	1053.44	1.5327	0.194618	7.87541	3.39623e-15	2.5806e-13	RN7S2	7S RNA 2 [Source:MGI Symbol;Acc:MGI:97953]
ENSMUSG00000071528	596.275	1.08534	0.137839	7.874	3.43484e-15	2.5997e-13	USMG5	upregulated during skeletal muscle growth 5 [Source:MGI Symbol;Acc:MGI:1891435]
ENSMUSG00000051065	44.8583	-1.46153	0.185691	-7.87078	3.52434e-15	2.65702e-13	MB21D2	Mab-21 domain containing 2 [Source:MGI Symbol;Acc:MGI:1917028]
ENSMUSG00000037706	41219.7	-0.518253	0.0658721	-7.86756	3.61622e-15	2.71568e-13	CD81	CD81 antigen [Source:MGI Symbol;Acc:MGI:1096398]
ENSMUSG00000037321	1059.24	-0.436479	0.0555576	-7.85634	3.95522e-15	2.95875e-13	TAP1	transporter 1, ATP-binding cassette, sub-family B (MDR/TAP) [Source:MGI Symbol;Acc:MGI:98483]
ENSMUSG00000028459	444.075	-0.894841	0.114048	-7.84617	4.28947e-15	3.1964e-13	CD72	CD72 antigen [Source:MGI Symbol;Acc:MGI:88345]
ENSMUSG00000033355	519.53	-0.909909	0.116266	-7.82606	5.03385e-15	3.73666e-13	RTP4	receptor transporter protein 4 [Source:MGI Symbol;Acc:MGI:1915025]
ENSMUSG00000028989	383.7	-0.781437	0.100024	-7.81247	5.6077e-15	4.14669e-13	ANGPTL7	angiopoietin-like 7 [Source:MGI Symbol;Acc:MGI:3605801]
ENSMUSG00000030427	12.8329	1.40727	0.180296	7.80536	5.93339e-15	4.37078e-13	LILRA6	leukocyte immunoglobulin-like receptor, subfamily A (with TM domain), member 6 [Source:MGI Symbol;Acc:MGI:1195969]
ENSMUSG00000073489	315.838	-0.963228	0.123574	-7.79477	6.45281e-15	4.73533e-13	IFI204	interferon activated gene 204 [Source:MGI Symbol;Acc:MGI:96429]
ENSMUSG00000046311	1874.37	0.414471	0.0531999	7.79082	6.6575e-15	4.86703e-13	ZFP62	zinc finger protein 62 [Source:MGI Symbol;Acc:MGI:99662]
ENSMUSG00000079499	103.256	-1.0693	0.137304	-7.78782	6.81733e-15	4.96508e-13	6530402F18RIK	RIKEN cDNA 6530402F18 gene [Source:MGI Symbol;Acc:MGI:1923470]
ENSMUSG00000065176	5.21325	1.39242	0.179446	7.75956	8.52218e-15	6.18339e-13	RNU12	RNA U12, small nuclear [Source:MGI Symbol;Acc:MGI:1336893]
ENSMUSG00000044678	28.6324	-1.46847	0.18964	-7.74346	9.67468e-15	6.99331e-13	LY6K	lymphocyte antigen 6 complex, locus K [Source:MGI Symbol;Acc:MGI:1923736]
ENSMUSG00000024235	355.17	0.637731	0.0824892	7.73108	1.06634e-14	7.67927e-13	MAP3K8	mitogen-activated protein kinase kinase kinase 8 [Source:MGI Symbol;Acc:MGI:1346878]
ENSMUSG00000062382	1181.05	-0.543614	0.070486	-7.71236	1.23508e-14	8.86133e-13	FTL1-PS1	ferritin light polypeptide 1, pseudogene 1 [Source:MGI Symbol;Acc:MGI:3779109]
ENSMUSG00000029156	788.77	-0.502007	0.0651869	-7.70104	1.34965e-14	9.64753e-13	SGCB	sarcoglycan, beta (dystrophin-associated glycoprotein) [Source:MGI Symbol;Acc:MGI:1346523]
ENSMUSG00000037185	11.3796	1.39552	0.181241	7.69981	1.36268e-14	9.7047e-13	KRT80	keratin 80 [Source:MGI Symbol;Acc:MGI:1921377]
ENSMUSG00000025647	4466.07	-0.559174	0.0726452	-7.69732	1.38944e-14	9.85893e-13	SHISA5	shisa family member 5 [Source:MGI Symbol;Acc:MGI:1915044]
ENSMUSG00000003032	21.9677	1.49389	0.194103	7.69634	1.40015e-14	9.89849e-13	KLF4	Kruppel-like factor 4 (gut) [Source:MGI Symbol;Acc:MGI:1342287]
ENSMUSG00000041921	847.843	0.744037	0.0969178	7.677	1.62859e-14	1.14715e-12	METAP1D	methionyl aminopeptidase type 1D (mitochondrial) [Source:MGI Symbol;Acc:MGI:1913809]
ENSMUSG00000003382	997.452	-0.647042	0.0845864	-7.64948	2.01799e-14	1.41626e-12	ETV3	ets variant 3 [Source:MGI Symbol;Acc:MGI:1350926]
ENSMUSG00000005973	278.419	-0.716293	0.0938428	-7.6329	2.29532e-14	1.60506e-12	RCN1	reticulocalbin 1 [Source:MGI Symbol;Acc:MGI:104559]
ENSMUSG00000020893	147.694	1.32308	0.173429	7.62897	2.36637e-14	1.64877e-12	PER1	period circadian clock 1 [Source:MGI Symbol;Acc:MGI:1098283]
ENSMUSG00000106106	35395.9	1.22222	0.161065	7.58841	3.23849e-14	2.24831e-12	CT010467.1	N/A
ENSMUSG00000078783	8.18359	1.31777	0.173688	7.58701	3.27375e-14	2.26463e-12	GM9733	predicted gene 9733 [Source:MGI Symbol;Acc:MGI:3780136]
ENSMUSG00000025132	7390.25	-0.488842	0.0644815	-7.58113	3.42565e-14	2.36126e-12	ARHGDIA	Rho GDP dissociation inhibitor (GDI) alpha [Source:MGI Symbol;Acc:MGI:2178103]
ENSMUSG00000031327	42.8273	-1.46853	0.193807	-7.57726	3.52916e-14	2.42394e-12	CHIC1	cysteine-rich hydrophobic domain 1 [Source:MGI Symbol;Acc:MGI:1344694]
ENSMUSG00000079419	494.589	0.73318	0.0967751	7.57612	3.56045e-14	2.43676e-12	MS4A6C	membrane-spanning 4-domains, subfamily A, member 6C [Source:MGI Symbol;Acc:MGI:2385644]
ENSMUSG00000016921	1943.64	0.457819	0.0606077	7.55382	4.22672e-14	2.88253e-12	SRSF6	serine/arginine-rich splicing factor 6 [Source:MGI Symbol;Acc:MGI:1915246]
ENSMUSG00000026180	44.3212	1.33771	0.177224	7.54809	4.41677e-14	3.00154e-12	CXCR2	chemokine (C-X-C motif) receptor 2 [Source:MGI Symbol;Acc:MGI:105303]
ENSMUSG00000032946	16.0104	1.45939	0.193675	7.53526	4.87364e-14	3.3004e-12	RASGRP2	RAS, guanyl releasing protein 2 [Source:MGI Symbol;Acc:MGI:1333849]
ENSMUSG00000044447	11.5513	1.41596	0.187955	7.5335	4.93998e-14	3.33362e-12	DOCK5	dedicator of cytokinesis 5 [Source:MGI Symbol;Acc:MGI:2652871]
ENSMUSG00000026656	5685.63	-0.415577	0.0551742	-7.53208	4.99364e-14	3.3581e-12	FCGR2B	Fc receptor, IgG, low affinity IIb [Source:MGI Symbol;Acc:MGI:95499]
ENSMUSG00000026104	1632.22	-0.562863	0.0747508	-7.52986	5.07941e-14	3.40391e-12	STAT1	signal transducer and activator of transcription 1 [Source:MGI Symbol;Acc:MGI:103063]
ENSMUSG00000078763	30.9712	1.4347	0.190946	7.51363	5.75111e-14	3.8407e-12	SLFN1	schlafen 1 [Source:MGI Symbol;Acc:MGI:1313259]
ENSMUSG00000066682	21.4128	1.45841	0.194136	7.51231	5.8092e-14	3.86612e-12	PILRB2	paired immunoglobin-like type 2 receptor beta 2 [Source:MGI Symbol;Acc:MGI:2450535]
ENSMUSG00000055322	864.343	-0.666085	0.0886908	-7.51019	5.90429e-14	3.9159e-12	TNS1	tensin 1 [Source:MGI Symbol;Acc:MGI:104552]
ENSMUSG00000074151	136.03	-0.986193	0.131343	-7.50852	5.97974e-14	3.95236e-12	NLRC5	NLR family, CARD domain containing 5 [Source:MGI Symbol;Acc:MGI:3612191]
ENSMUSG00000104022	16.3324	1.34503	0.179264	7.5031	6.23271e-14	4.10551e-12	GM37214	predicted gene, 37214 [Source:MGI Symbol;Acc:MGI:5610442]
ENSMUSG00000031391	19.3625	1.4547	0.194312	7.48641	7.0782e-14	4.64657e-12	L1CAM	L1 cell adhesion molecule [Source:MGI Symbol;Acc:MGI:96721]
ENSMUSG00000008540	60.6459	1.41814	0.18986	7.46939	8.0567e-14	5.27099e-12	MGST1	microsomal glutathione S-transferase 1 [Source:MGI Symbol;Acc:MGI:1913850]
ENSMUSG00000078780	7.55441	1.28527	0.172221	7.46294	8.46111e-14	5.51687e-12	GM5150	predicted gene 5150 [Source:MGI Symbol;Acc:MGI:3779469]
ENSMUSG00000027315	3066.39	-0.420299	0.056366	-7.45662	8.8773e-14	5.76875e-12	SPINT1	serine protease inhibitor, Kunitz type 1 [Source:MGI Symbol;Acc:MGI:1338033]
ENSMUSG00000051682	40.1094	1.39812	0.187672	7.44983	9.34632e-14	6.05315e-12	TREML4	triggering receptor expressed on myeloid cells-like 4 [Source:MGI Symbol;Acc:MGI:1923239]
ENSMUSG00000062822	729.814	0.39353	0.0528713	7.44316	9.8302e-14	6.34524e-12	4833420G17RIK	RIKEN cDNA 4833420G17 gene [Source:MGI Symbol;Acc:MGI:1914642]
ENSMUSG00000003363	3854.58	-0.567035	0.0763777	-7.42408	1.13565e-13	7.30604e-12	PLD3	phospholipase D family, member 3 [Source:MGI Symbol;Acc:MGI:1333782]
ENSMUSG00000031586	269.971	-0.647732	0.0874629	-7.40579	1.30368e-13	8.35915e-12	RBPMS	RNA binding protein gene with multiple splicing [Source:MGI Symbol;Acc:MGI:1334446]
ENSMUSG00000073599	3450.04	0.484778	0.0655285	7.39798	1.38275e-13	8.8368e-12	ECSCR	endothelial cell surface expressed chemotaxis and apoptosis regulator [Source:MGI Symbol;Acc:MGI:1915795]
ENSMUSG00000019039	1063.33	0.702296	0.0950298	7.39027	1.46535e-13	9.33372e-12	DALRD3	DALR anticodon binding domain containing 3 [Source:MGI Symbol;Acc:MGI:1915039]
ENSMUSG00000008763	2804.72	-0.354497	0.048038	-7.37952	1.58865e-13	1.00858e-11	MAN1A2	mannosidase, alpha, class 1A, member 2 [Source:MGI Symbol;Acc:MGI:104676]
ENSMUSG00000026956	1060.11	-0.420523	0.057022	-7.37475	1.64655e-13	1.04191e-11	UAP1L1	UDP-N-acteylglucosamine pyrophosphorylase 1-like 1 [Source:MGI Symbol;Acc:MGI:2443318]
ENSMUSG00000075225	282.421	0.75327	0.102333	7.36097	1.82583e-13	1.15159e-11	CCDC162	coiled-coil domain containing 162 [Source:MGI Symbol;Acc:MGI:1923223]
ENSMUSG00000008206	97.5554	-1.23272	0.167661	-7.35246	1.94588e-13	1.22331e-11	CERS4	ceramide synthase 4 [Source:MGI Symbol;Acc:MGI:1914510]
ENSMUSG00000011884	2272.88	-0.6112	0.0831676	-7.34901	1.99678e-13	1.25123e-11	GLTP	glycolipid transfer protein [Source:MGI Symbol;Acc:MGI:1929253]
ENSMUSG00000046908	26.1019	1.42927	0.194501	7.34841	2.00584e-13	1.25284e-11	LTB4R1	leukotriene B4 receptor 1 [Source:MGI Symbol;Acc:MGI:1309472]
ENSMUSG00000070407	155.391	-1.03567	0.140962	-7.34712	2.02529e-13	1.26091e-11	HS3ST3B1	heparan sulfate (glucosamine) 3-O-sulfotransferase 3B1 [Source:MGI Symbol;Acc:MGI:1333853]
ENSMUSG00000074417	15.9663	1.38419	0.188485	7.34377	2.07661e-13	1.2887e-11	GM14548	predicted gene 14548 [Source:MGI Symbol;Acc:MGI:3709645]
ENSMUSG00000028191	1111.64	0.435044	0.0593199	7.33387	2.23606e-13	1.38321e-11	BCL10	B cell leukemia/lymphoma 10 [Source:MGI Symbol;Acc:MGI:1337994]
ENSMUSG00000038497	697.423	-0.454257	0.0619455	-7.33318	2.24748e-13	1.38583e-11	TMCO3	transmembrane and coiled-coil domains 3 [Source:MGI Symbol;Acc:MGI:2444946]
ENSMUSG00000099583	11.8686	1.41847	0.194193	7.30445	2.78401e-13	1.71119e-11	HIST1H3D	histone cluster 1, H3d [Source:MGI Symbol;Acc:MGI:2448322]
ENSMUSG00000029373	176.495	1.2277	0.168443	7.28852	3.13373e-13	1.92003e-11	PF4	platelet factor 4 [Source:MGI Symbol;Acc:MGI:1888711]
ENSMUSG00000003545	4.54243	1.29457	0.177977	7.2738	3.49522e-13	2.13474e-11	FOSB	FBJ osteosarcoma oncogene B [Source:MGI Symbol;Acc:MGI:95575]
ENSMUSG00000013698	3662.29	-0.325777	0.0447968	-7.27232	3.53374e-13	2.15146e-11	PEA15A	phosphoprotein enriched in astrocytes 15A [Source:MGI Symbol;Acc:MGI:104799]
ENSMUSG00000035274	10.6599	-1.38805	0.191091	-7.26385	3.76218e-13	2.28334e-11	TPBG	trophoblast glycoprotein [Source:MGI Symbol;Acc:MGI:1341264]
ENSMUSG00000029328	1196.52	0.534952	0.0737155	7.25698	3.95832e-13	2.39484e-11	HNRNPDL	heterogeneous nuclear ribonucleoprotein D-like [Source:MGI Symbol;Acc:MGI:1355299]
ENSMUSG00000020604	1068.61	-0.487833	0.0672479	-7.25424	4.03927e-13	2.43619e-11	ARSG	arylsulfatase G [Source:MGI Symbol;Acc:MGI:1921258]
ENSMUSG00000024339	2266.34	-0.511503	0.0705177	-7.25354	4.06006e-13	2.4411e-11	TAP2	transporter 2, ATP-binding cassette, sub-family B (MDR/TAP) [Source:MGI Symbol;Acc:MGI:98484]
ENSMUSG00000053063	87.6882	1.20875	0.166942	7.24056	4.46849e-13	2.67832e-11	CLEC12A	C-type lectin domain family 12, member a [Source:MGI Symbol;Acc:MGI:3040968]
ENSMUSG00000000278	2216.61	-0.476495	0.0659109	-7.22937	4.8523e-13	2.88444e-11	SCPEP1	serine carboxypeptidase 1 [Source:MGI Symbol;Acc:MGI:1921867]
ENSMUSG00000021886	232.287	-0.864072	0.119532	-7.22882	4.87216e-13	2.88444e-11	GPR65	G-protein coupled receptor 65 [Source:MGI Symbol;Acc:MGI:108031]
ENSMUSG00000035967	5423.98	0.632465	0.0874854	7.22938	4.85212e-13	2.88444e-11	INTS6L	integrator complex subunit 6 like [Source:MGI Symbol;Acc:MGI:2442593]
ENSMUSG00000052160	19255.6	-0.337593	0.0466992	-7.22911	4.86181e-13	2.88444e-11	PLD4	phospholipase D family, member 4 [Source:MGI Symbol;Acc:MGI:2144765]
ENSMUSG00000017830	369.555	-0.501026	0.0693229	-7.22742	4.92248e-13	2.90416e-11	DHX58	DEXH (Asp-Glu-X-His) box polypeptide 58 [Source:MGI Symbol;Acc:MGI:1931560]
ENSMUSG00000025586	19.1085	-1.35223	0.187106	-7.22706	4.93557e-13	2.90416e-11	CPEB1	cytoplasmic polyadenylation element binding protein 1 [Source:MGI Symbol;Acc:MGI:108442]
ENSMUSG00000033543	542.713	0.749206	0.103782	7.21907	5.2346e-13	3.07076e-11	GTF2A2	general transcription factor II A, 2 [Source:MGI Symbol;Acc:MGI:1933289]
ENSMUSG00000041552	102.152	-0.882473	0.122277	-7.21697	5.3157e-13	3.10888e-11	PTCHD1	patched domain containing 1 [Source:MGI Symbol;Acc:MGI:2685233]
ENSMUSG00000104351	24.4729	1.3998	0.194328	7.20329	5.87776e-13	3.42721e-11	GM37125	predicted gene, 37125 [Source:MGI Symbol;Acc:MGI:5610353]
ENSMUSG00000093674	1318.21	0.898608	0.124773	7.20191	5.93727e-13	3.45149e-11	RPL41	ribosomal protein L41 [Source:MGI Symbol;Acc:MGI:1915195]
ENSMUSG00000044708	24.9876	-1.3028	0.18111	-7.19345	6.31755e-13	3.66152e-11	KCNJ10	potassium inwardly-rectifying channel, subfamily J, member 10 [Source:MGI Symbol;Acc:MGI:1194504]
ENSMUSG00000097417	49.7103	1.2989	0.180691	7.18849	6.55121e-13	3.78558e-11	GM26669	predicted gene, 26669 [Source:MGI Symbol;Acc:MGI:5477163]
ENSMUSG00000012640	1986.94	0.450074	0.0626919	7.17913	7.01549e-13	4.04176e-11	ZFP715	zinc finger protein 715 [Source:MGI Symbol;Acc:MGI:1917180]
ENSMUSG00000023456	1486.81	-0.510508	0.0712799	-7.16202	7.94939e-13	4.56617e-11	TPI1	triosephosphate isomerase 1 [Source:MGI Symbol;Acc:MGI:98797]
ENSMUSG00000031304	268.323	-0.88037	0.122974	-7.15897	8.12828e-13	4.65507e-11	IL2RG	interleukin 2 receptor, gamma chain [Source:MGI Symbol;Acc:MGI:96551]
ENSMUSG00000095788	20.9098	1.31826	0.184188	7.15715	8.23726e-13	4.70353e-11	SIRPB1A	signal-regulatory protein beta 1A [Source:MGI Symbol;Acc:MGI:2444824]
ENSMUSG00000060519	2073.81	-0.471405	0.0658702	-7.15657	8.27233e-13	4.70962e-11	TOR3A	torsin family 3, member A [Source:MGI Symbol;Acc:MGI:1353652]
ENSMUSG00000020641	75.3268	-1.16472	0.162998	-7.14561	8.9596e-13	5.08589e-11	RSAD2	radical S-adenosyl methionine domain containing 2 [Source:MGI Symbol;Acc:MGI:1929628]
ENSMUSG00000060743	3813.99	0.650035	0.0909848	7.14443	9.03677e-13	5.11465e-11	H3F3A	H3 histone, family 3A [Source:MGI Symbol;Acc:MGI:1097686]
ENSMUSG00000022992	1021.77	0.379815	0.0532415	7.13381	9.76286e-13	5.49339e-11	KANSL2	KAT8 regulatory NSL complex subunit 2 [Source:MGI Symbol;Acc:MGI:1916862]
ENSMUSG00000042873	26.3111	-1.28024	0.179451	-7.13416	9.73783e-13	5.49339e-11	LHFPL4	lipoma HMGIC fusion partner-like protein 4 [Source:MGI Symbol;Acc:MGI:3057108]
ENSMUSG00000021087	1940.17	-0.536597	0.0753907	-7.11755	1.0986e-12	6.16367e-11	RTN1	reticulon 1 [Source:MGI Symbol;Acc:MGI:1933947]
ENSMUSG00000002992	25.8786	1.37057	0.193044	7.09978	1.24959e-12	6.99045e-11	APOC2	apolipoprotein C-II [Source:MGI Symbol;Acc:MGI:88054]
ENSMUSG00000045665	1929.74	-0.534809	0.0753632	-7.09642	1.28028e-12	7.14147e-11	MFSD5	major facilitator superfamily domain containing 5 [Source:MGI Symbol;Acc:MGI:2145901]
ENSMUSG00000031144	75.3236	-1.14787	0.162063	-7.08285	1.41217e-12	7.85444e-11	SYP	synaptophysin [Source:MGI Symbol;Acc:MGI:98467]
ENSMUSG00000063524	6609.6	-0.446999	0.0631436	-7.07909	1.45106e-12	8.04756e-11	ENO1	enolase 1, alpha non-neuron [Source:MGI Symbol;Acc:MGI:95393]
ENSMUSG00000096904	153.687	0.783042	0.110632	7.0779	1.46353e-12	8.09343e-11	GM3591	predicted gene 3591 [Source:MGI Symbol;Acc:MGI:3781768]
ENSMUSG00000006611	2988.98	0.331905	0.0469351	7.07158	1.53183e-12	8.44695e-11	HFE	hemochromatosis [Source:MGI Symbol;Acc:MGI:109191]
ENSMUSG00000059325	14.0059	1.36331	0.192852	7.06922	1.55805e-12	8.56707e-11	HOPX	HOP homeobox [Source:MGI Symbol;Acc:MGI:1916782]
ENSMUSG00000025979	1020.84	0.422648	0.0597949	7.06829	1.56856e-12	8.60033e-11	MOB4	MOB family member 4, phocein [Source:MGI Symbol;Acc:MGI:104899]
ENSMUSG00000060802	28707.8	-0.497302	0.0705387	-7.05007	1.78834e-12	9.77759e-11	B2M	beta-2 microglobulin [Source:MGI Symbol;Acc:MGI:88127]
ENSMUSG00000004891	52.7552	-1.12882	0.160128	-7.04949	1.79579e-12	9.79063e-11	NES	nestin [Source:MGI Symbol;Acc:MGI:101784]
ENSMUSG00000001418	3343.82	-0.500939	0.0710874	-7.04681	1.83061e-12	9.92498e-11	GLMP	glycosylated lysosomal membrane protein [Source:MGI Symbol;Acc:MGI:1913318]
ENSMUSG00000033272	1653.69	-0.361613	0.0513159	-7.04681	1.83072e-12	9.92498e-11	SLC35A4	solute carrier family 35, member A4 [Source:MGI Symbol;Acc:MGI:1915093]
ENSMUSG00000096210	994.461	0.552612	0.0785444	7.03566	1.98316e-12	1.07213e-10	H1F0	H1 histone family, member 0 [Source:MGI Symbol;Acc:MGI:95893]
ENSMUSG00000025855	311.1	-0.708202	0.100771	-7.02785	2.09743e-12	1.13074e-10	PRKAR1B	protein kinase, cAMP dependent regulatory, type I beta [Source:MGI Symbol;Acc:MGI:97759]
ENSMUSG00000026938	16.3435	1.35656	0.193377	7.0151	2.29785e-12	1.23534e-10	FCNA	ficolin A [Source:MGI Symbol;Acc:MGI:1340905]
ENSMUSG00000002007	964.039	0.564213	0.0804844	7.01021	2.37963e-12	1.27574e-10	SRPK3	serine/arginine-rich protein specific kinase 3 [Source:MGI Symbol;Acc:MGI:1891338]
ENSMUSG00000066613	272.413	0.636972	0.0908809	7.00886	2.40269e-12	1.28454e-10	ZFP932	zinc finger protein 932 [Source:MGI Symbol;Acc:MGI:1916754]
ENSMUSG00000101970	686.753	0.53969	0.0770212	7.00704	2.43413e-12	1.29775e-10	1810026B05RIK	RIKEN cDNA 1810026B05 gene [Source:MGI Symbol;Acc:MGI:1916420]
ENSMUSG00000042699	665.978	0.762269	0.108861	7.00222	2.51932e-12	1.33947e-10	DHX9	DEAH (Asp-Glu-Ala-His) box polypeptide 9 [Source:MGI Symbol;Acc:MGI:108177]
ENSMUSG00000029254	25.3915	1.36199	0.194582	6.99956	2.56769e-12	1.36144e-10	STAP1	signal transducing adaptor family member 1 [Source:MGI Symbol;Acc:MGI:1926193]
ENSMUSG00000079036	621.361	0.528416	0.0755224	6.99681	2.61847e-12	1.38456e-10	ALKBH1	alkB homolog 1, histone H2A dioxygenase [Source:MGI Symbol;Acc:MGI:2384034]
ENSMUSG00000048200	422.442	0.571036	0.0816219	6.99611	2.63159e-12	1.3877e-10	CRACR2B	calcium release activated channel regulator 2B [Source:MGI Symbol;Acc:MGI:2446129]
ENSMUSG00000079457	7.98288	-1.31427	0.18788	-6.99527	2.64749e-12	1.39227e-10	GM7609	predicted pseudogene 7609 [Source:MGI Symbol;Acc:MGI:3644536]
ENSMUSG00000034459	99.481	-1.08756	0.155505	-6.99376	2.67623e-12	1.40357e-10	IFIT1	interferon-induced protein with tetratricopeptide repeats 1 [Source:MGI Symbol;Acc:MGI:99450]
ENSMUSG00000043740	570.974	-0.733066	0.104827	-6.99309	2.6889e-12	1.40639e-10	B430306N03RIK	RIKEN cDNA B430306N03 gene [Source:MGI Symbol;Acc:MGI:2443478]
ENSMUSG00000041707	963.654	0.521964	0.0746944	6.98799	2.78847e-12	1.45453e-10	1810011H11RIK	RIKEN cDNA 1810011H11 gene [Source:MGI Symbol;Acc:MGI:1916319]
ENSMUSG00000058317	46.8222	-1.20966	0.173149	-6.98625	2.82335e-12	1.46875e-10	UBE2E2	ubiquitin-conjugating enzyme E2E 2 [Source:MGI Symbol;Acc:MGI:2384997]
ENSMUSG00000080999	4.56225	1.29219	0.185222	6.97641	3.02816e-12	1.56685e-10	GM11336	predicted gene 11336 [Source:MGI Symbol;Acc:MGI:3651860]
ENSMUSG00000031786	7.87393	1.21207	0.173753	6.9758	3.04143e-12	1.56951e-10	DRC7	dynein regulatory complex subunit 7 [Source:MGI Symbol;Acc:MGI:2685616]
ENSMUSG00000030731	128.455	-0.785842	0.112667	-6.97491	3.06068e-12	1.57523e-10	SYT3	synaptotagmin III [Source:MGI Symbol;Acc:MGI:99665]
ENSMUSG00000027661	55.6177	-1.29312	0.18541	-6.97438	3.07225e-12	1.57698e-10	SLC2A10	solute carrier family 2 (facilitated glucose transporter), member 10 [Source:MGI Symbol;Acc:MGI:2156687]
ENSMUSG00000028480	30.157	1.33435	0.191523	6.96704	3.23668e-12	1.65698e-10	GLIPR2	GLI pathogenesis-related 2 [Source:MGI Symbol;Acc:MGI:1917770]
ENSMUSG00000026126	1337.85	0.757768	0.108868	6.9604	3.39313e-12	1.73247e-10	PTPN18	protein tyrosine phosphatase, non-receptor type 18 [Source:MGI Symbol;Acc:MGI:108410]
ENSMUSG00000058794	35.2331	1.22308	0.17609	6.94577	3.76394e-12	1.91673e-10	NFE2	nuclear factor, erythroid derived 2 [Source:MGI Symbol;Acc:MGI:97308]
ENSMUSG00000002326	1477.65	0.527043	0.0759456	6.93975	3.92804e-12	1.99428e-10	GMPR2	guanosine monophosphate reductase 2 [Source:MGI Symbol;Acc:MGI:1917903]
ENSMUSG00000025579	3282.86	-0.570526	0.0822151	-6.93943	3.93689e-12	1.99428e-10	GAA	glucosidase, alpha, acid [Source:MGI Symbol;Acc:MGI:95609]
ENSMUSG00000035530	6327.69	0.336119	0.0484695	6.93464	4.07248e-12	2.05756e-10	EIF1	eukaryotic translation initiation factor 1 [Source:MGI Symbol;Acc:MGI:105125]
ENSMUSG00000021069	233.864	1.04667	0.151095	6.9272	4.29262e-12	2.16312e-10	PYGL	liver glycogen phosphorylase [Source:MGI Symbol;Acc:MGI:97829]
ENSMUSG00000038390	47.7206	-0.96958	0.140001	-6.92554	4.34311e-12	2.18287e-10	GPR162	G protein-coupled receptor 162 [Source:MGI Symbol;Acc:MGI:1315214]
ENSMUSG00000030413	48.5589	1.20457	0.173974	6.92383	4.39581e-12	2.20361e-10	PGLYRP1	peptidoglycan recognition protein 1 [Source:MGI Symbol;Acc:MGI:1345092]
ENSMUSG00000104761	103.589	-0.964555	0.139342	-6.9222	4.44683e-12	2.22341e-10	GM43511	predicted gene 43511 [Source:MGI Symbol;Acc:MGI:5663648]
ENSMUSG00000032294	4751.17	-0.462364	0.0668673	-6.91466	4.69001e-12	2.33895e-10	PKM	pyruvate kinase, muscle [Source:MGI Symbol;Acc:MGI:97591]
ENSMUSG00000074398	70.0163	0.779908	0.112873	6.90963	4.8591e-12	2.41703e-10	GM15441	predicted gene 15441 [Source:MGI Symbol;Acc:MGI:3641753]
ENSMUSG00000097194	35.1406	-1.32902	0.19276	-6.89467	5.39917e-12	2.67876e-10	9330175E14RIK	RIKEN cDNA 9330175E14 gene [Source:MGI Symbol;Acc:MGI:2443913]
ENSMUSG00000000732	1931.55	-0.341292	0.0495807	-6.88356	5.83752e-12	2.88395e-10	ICOSL	icos ligand [Source:MGI Symbol;Acc:MGI:1354701]
ENSMUSG00000022013	289.591	0.992928	0.144249	6.88344	5.84262e-12	2.88395e-10	DNAJC15	DnaJ heat shock protein family (Hsp40) member C15 [Source:MGI Symbol;Acc:MGI:1913398]
ENSMUSG00000040462	3777.48	-0.495782	0.0720434	-6.88171	5.9137e-12	2.91159e-10	OS9	amplified in osteosarcoma [Source:MGI Symbol;Acc:MGI:1924301]
ENSMUSG00000019873	1889.49	-0.485863	0.0706139	-6.88055	5.96226e-12	2.9206e-10	REEP3	receptor accessory protein 3 [Source:MGI Symbol;Acc:MGI:88930]
ENSMUSG00000043391	1728.41	-0.665284	0.0966903	-6.88056	5.96163e-12	2.9206e-10	2510009E07RIK	RIKEN cDNA 2510009E07 gene [Source:MGI Symbol;Acc:MGI:1919440]
ENSMUSG00000043923	169.835	0.732443	0.106475	6.87902	6.02657e-12	2.94463e-10	CCDC84	coiled-coil domain containing 84 [Source:MGI Symbol;Acc:MGI:2685960]
ENSMUSG00000004530	1484.08	-0.412986	0.0600473	-6.87768	6.0835e-12	2.96494e-10	CORO1C	coronin, actin binding protein 1C [Source:MGI Symbol;Acc:MGI:1345964]
ENSMUSG00000069306	9.92653	1.29646	0.188712	6.87	6.42001e-12	3.12106e-10	HIST1H4M	histone cluster 1, H4m [Source:MGI Symbol;Acc:MGI:2448441]
ENSMUSG00000032002	870.727	0.525543	0.0765508	6.86528	6.63603e-12	3.21797e-10	DCUN1D5	DCN1, defective in cullin neddylation 1, domain containing 5 (S. cerevisiae) [Source:MGI Symbol;Acc:MGI:1924113]
ENSMUSG00000018707	950.552	-0.626748	0.0913319	-6.86232	6.7752e-12	3.27723e-10	DYNC1H1	dynein cytoplasmic 1 heavy chain 1 [Source:MGI Symbol;Acc:MGI:103147]
ENSMUSG00000018930	573.293	-0.882376	0.128692	-6.8565	7.0567e-12	3.40486e-10	CCL4	chemokine (C-C motif) ligand 4 [Source:MGI Symbol;Acc:MGI:98261]
ENSMUSG00000021537	590.159	0.464626	0.0677988	6.85302	7.23061e-12	3.48007e-10	CETN3	centrin 3 [Source:MGI Symbol;Acc:MGI:1097706]
ENSMUSG00000020390	1252.45	0.529441	0.0773933	6.84091	7.86911e-12	3.77796e-10	UBE2B	ubiquitin-conjugating enzyme E2B [Source:MGI Symbol;Acc:MGI:102944]
ENSMUSG00000028195	12.376	1.20141	0.175684	6.83849	8.0035e-12	3.83294e-10	CYR61	cysteine rich protein 61 [Source:MGI Symbol;Acc:MGI:88613]
ENSMUSG00000005142	16661.9	-0.499917	0.073128	-6.83619	8.13272e-12	3.88519e-10	MAN2B1	mannosidase 2, alpha B1 [Source:MGI Symbol;Acc:MGI:107286]
ENSMUSG00000106636	154.532	0.937533	0.137206	6.83304	8.31337e-12	3.96168e-10	GM43813	predicted gene 43813 [Source:MGI Symbol;Acc:MGI:5663950]
ENSMUSG00000030282	860.807	-0.406604	0.0596682	-6.81442	9.46457e-12	4.49917e-10	CMAS	cytidine monophospho-N-acetylneuraminic acid synthetase [Source:MGI Symbol;Acc:MGI:1337124]
ENSMUSG00000060591	128.612	1.18279	0.173794	6.80568	1.00574e-11	4.76923e-10	IFITM2	interferon induced transmembrane protein 2 [Source:MGI Symbol;Acc:MGI:1933382]
ENSMUSG00000079402	166.603	0.749999	0.110235	6.80363	1.02014e-11	4.81386e-10	GM3020	predicted gene 3020 [Source:MGI Symbol;Acc:MGI:3781198]
ENSMUSG00000096488	166.603	0.749999	0.110235	6.80363	1.02014e-11	4.81386e-10	GM10409	predicted gene 10409 [Source:MGI Symbol;Acc:MGI:3710610]
ENSMUSG00000068735	677.235	-0.645263	0.0949561	-6.79538	1.0803e-11	5.08532e-10	TRP53I11	transformation related protein 53 inducible protein 11 [Source:MGI Symbol;Acc:MGI:2670995]
ENSMUSG00000006219	345.809	-0.654113	0.0962691	-6.79463	1.08594e-11	5.08703e-10	FBLIM1	filamin binding LIM protein 1 [Source:MGI Symbol;Acc:MGI:1921452]
ENSMUSG00000031447	21688.7	-0.403268	0.0593495	-6.7948	1.08462e-11	5.08703e-10	LAMP1	lysosomal-associated membrane protein 1 [Source:MGI Symbol;Acc:MGI:96745]
ENSMUSG00000047139	28.16	1.16288	0.171351	6.78655	1.14846e-11	5.36055e-10	CD24A	CD24a antigen [Source:MGI Symbol;Acc:MGI:88323]
ENSMUSG00000047945	331.62	-0.581342	0.0856632	-6.78637	1.14988e-11	5.36055e-10	MARCKSL1	MARCKS-like 1 [Source:MGI Symbol;Acc:MGI:97143]
ENSMUSG00000036781	635.921	0.864355	0.127627	6.77251	1.26564e-11	5.88601e-10	RPS27L	ribosomal protein S27-like [Source:MGI Symbol;Acc:MGI:1915191]
ENSMUSG00000032860	31.3013	-1.28205	0.189357	-6.77057	1.28276e-11	5.95127e-10	P2RY2	purinergic receptor P2Y, G-protein coupled 2 [Source:MGI Symbol;Acc:MGI:105107]
ENSMUSG00000085786	6.37678	1.14749	0.169652	6.76376	1.34455e-11	6.22298e-10	GM15987	predicted gene 15987 [Source:MGI Symbol;Acc:MGI:3801849]
ENSMUSG00000032690	87.4535	-1.13571	0.168006	-6.7599	1.38087e-11	6.37579e-10	OAS2	2'-5' oligoadenylate synthetase 2 [Source:MGI Symbol;Acc:MGI:2180852]
ENSMUSG00000049723	85.5782	-1.31375	0.194721	-6.74685	1.51089e-11	6.95946e-10	MMP12	matrix metallopeptidase 12 [Source:MGI Symbol;Acc:MGI:97005]
ENSMUSG00000028657	7042.92	-0.216245	0.0320594	-6.74512	1.52903e-11	7.02627e-10	PPT1	palmitoyl-protein thioesterase 1 [Source:MGI Symbol;Acc:MGI:1298204]
ENSMUSG00000000957	833.638	-0.641196	0.0950875	-6.74322	1.54913e-11	7.10171e-10	MMP14	matrix metallopeptidase 14 (membrane-inserted) [Source:MGI Symbol;Acc:MGI:101900]
ENSMUSG00000020642	13.1265	1.1525	0.171093	6.73608	1.62721e-11	7.44196e-10	RNF144A	ring finger protein 144A [Source:MGI Symbol;Acc:MGI:1344401]
ENSMUSG00000052889	1996.57	-0.50327	0.074772	-6.73073	1.68815e-11	7.70245e-10	PRKCB	protein kinase C, beta [Source:MGI Symbol;Acc:MGI:97596]
ENSMUSG00000036273	14.2039	1.2587	0.187021	6.73022	1.69405e-11	7.7111e-10	LRRK2	leucine-rich repeat kinase 2 [Source:MGI Symbol;Acc:MGI:1913975]
ENSMUSG00000037849	59.655	-1.2561	0.186648	-6.72978	1.69918e-11	7.71629e-10	IFI206	interferon activated gene 206 [Source:MGI Symbol;Acc:MGI:3646410]
ENSMUSG00000074256	10.2859	1.29715	0.192775	6.72882	1.71046e-11	7.74927e-10	GM10655	predicted gene 10655 [Source:MGI Symbol;Acc:MGI:3642575]
ENSMUSG00000017002	60.3781	1.10425	0.164201	6.72498	1.75614e-11	7.93759e-10	SLPI	secretory leukocyte peptidase inhibitor [Source:MGI Symbol;Acc:MGI:109297]
ENSMUSG00000056215	54.9421	-1.27858	0.190578	-6.70893	1.96052e-11	8.84068e-10	LRGUK	leucine-rich repeats and guanylate kinase domain containing [Source:MGI Symbol;Acc:MGI:1921604]
ENSMUSG00000002625	2500.39	0.515038	0.0768877	6.69858	2.10459e-11	9.46819e-10	AKAP8L	A kinase (PRKA) anchor protein 8-like [Source:MGI Symbol;Acc:MGI:1860606]
ENSMUSG00000056290	10.8889	1.26016	0.188174	6.69677	2.13081e-11	9.56385e-10	MS4A4B	membrane-spanning 4-domains, subfamily A, member 4B [Source:MGI Symbol;Acc:MGI:1913083]
ENSMUSG00000029229	875.026	0.406764	0.0607873	6.69159	2.20755e-11	9.88533e-10	CHIC2	cysteine-rich hydrophobic domain 2 [Source:MGI Symbol;Acc:MGI:1921527]
ENSMUSG00000031825	8.47464	1.16319	0.173876	6.6898	2.2347e-11	9.98372e-10	CRISPLD2	cysteine-rich secretory protein LCCL domain containing 2 [Source:MGI Symbol;Acc:MGI:1926142]
ENSMUSG00000068220	60.9743	1.05218	0.157337	6.68747	2.27063e-11	1.01208e-09	LGALS1	lectin, galactose binding, soluble 1 [Source:MGI Symbol;Acc:MGI:96777]
ENSMUSG00000032915	144.104	1.27606	0.190965	6.68214	2.35482e-11	1.04719e-09	ADGRE4	adhesion G protein-coupled receptor E4 [Source:MGI Symbol;Acc:MGI:1196464]
ENSMUSG00000042293	152.232	0.911189	0.136476	6.67655	2.44636e-11	1.0854e-09	GM5617	predicted gene 5617 [Source:MGI Symbol;Acc:MGI:3643566]
ENSMUSG00000054293	557.437	0.557852	0.0835814	6.67435	2.48324e-11	1.09923e-09	A630033H20RIK	RIKEN cDNA A630033H20 gene [Source:MGI Symbol;Acc:MGI:2441814]
ENSMUSG00000097224	40.9621	-1.04779	0.157018	-6.67306	2.5052e-11	1.10642e-09	GM26716	predicted gene, 26716 [Source:MGI Symbol;Acc:MGI:5477210]
ENSMUSG00000103677	144.098	-1.07059	0.160616	-6.66554	2.63698e-11	1.16195e-09	PCDHGA4	protocadherin gamma subfamily A, 4 [Source:MGI Symbol;Acc:MGI:1935216]
ENSMUSG00000069300	5.72371	1.19634	0.179635	6.65984	2.74127e-11	1.20516e-09	HIST1H2BJ	histone cluster 1, H2bj [Source:MGI Symbol;Acc:MGI:2448388]
ENSMUSG00000090553	388.505	0.665409	0.0999212	6.65934	2.75061e-11	1.20652e-09	SNRPE	small nuclear ribonucleoprotein E [Source:MGI Symbol;Acc:MGI:98346]
ENSMUSG00000022372	4746.07	0.300366	0.0451229	6.65663	2.8018e-11	1.22618e-09	SLA	src-like adaptor [Source:MGI Symbol;Acc:MGI:104295]
ENSMUSG00000026904	10.1228	1.14135	0.171599	6.65128	2.9056e-11	1.26874e-09	SLC4A10	solute carrier family 4, sodium bicarbonate cotransporter-like, member 10 [Source:MGI Symbol;Acc:MGI:2150150]
ENSMUSG00000028680	767.116	-0.728921	0.109693	-6.64513	3.02957e-11	1.31988e-09	PLK3	polo-like kinase 3 [Source:MGI Symbol;Acc:MGI:109604]
ENSMUSG00000099041	571.349	0.76525	0.115183	6.64377	3.0575e-11	1.32905e-09	GM28035	predicted gene, 28035 [Source:MGI Symbol;Acc:MGI:5547771]
ENSMUSG00000032422	1073.75	0.327214	0.04927	6.64123	3.11079e-11	1.34615e-09	SNX14	sorting nexin 14 [Source:MGI Symbol;Acc:MGI:2155664]
ENSMUSG00000059108	42.1872	1.14168	0.171904	6.64139	3.10748e-11	1.34615e-09	IFITM6	interferon induced transmembrane protein 6 [Source:MGI Symbol;Acc:MGI:2686976]
ENSMUSG00000026832	91.9254	1.19533	0.180381	6.62672	3.43233e-11	1.48197e-09	CYTIP	cytohesin 1 interacting protein [Source:MGI Symbol;Acc:MGI:2183535]
ENSMUSG00000028049	1307.39	-0.386539	0.0583525	-6.6242	3.4913e-11	1.50406e-09	SCAMP3	secretory carrier membrane protein 3 [Source:MGI Symbol;Acc:MGI:1346346]
ENSMUSG00000017466	12801.5	-0.43393	0.065531	-6.62176	3.54959e-11	1.52577e-09	TIMP2	tissue inhibitor of metalloproteinase 2 [Source:MGI Symbol;Acc:MGI:98753]
ENSMUSG00000063511	1108.8	0.437913	0.0661709	6.61791	3.64317e-11	1.56251e-09	SNRNP70	small nuclear ribonucleoprotein 70 (U1) [Source:MGI Symbol;Acc:MGI:98341]
ENSMUSG00000032204	6.48996	1.14078	0.172514	6.61268	3.77427e-11	1.61515e-09	AQP9	aquaporin 9 [Source:MGI Symbol;Acc:MGI:1891066]
ENSMUSG00000057315	386.707	-0.554741	0.0839046	-6.61156	3.80285e-11	1.62378e-09	ARHGAP24	Rho GTPase activating protein 24 [Source:MGI Symbol;Acc:MGI:1922647]
ENSMUSG00000030785	49.2133	-1.09448	0.165566	-6.61055	3.82897e-11	1.63133e-09	COX6A2	cytochrome c oxidase subunit VIa polypeptide 2 [Source:MGI Symbol;Acc:MGI:104649]
ENSMUSG00000040950	113.162	1.1402	0.172656	6.60387	4.00563e-11	1.70283e-09	MGL2	macrophage galactose N-acetyl-galactosamine specific lectin 2 [Source:MGI Symbol;Acc:MGI:2385729]
ENSMUSG00000042670	403.893	0.893299	0.135361	6.59937	4.129e-11	1.75142e-09	IMMP1L	IMP1 inner mitochondrial membrane peptidase-like (S. cerevisiae) [Source:MGI Symbol;Acc:MGI:1913791]
ENSMUSG00000018012	206.522	0.700611	0.106213	6.5963	4.21535e-11	1.78413e-09	RAC3	RAS-related C3 botulinum substrate 3 [Source:MGI Symbol;Acc:MGI:2180784]
ENSMUSG00000027009	73.8954	1.19819	0.181905	6.58686	4.49222e-11	1.89715e-09	ITGA4	integrin alpha 4 [Source:MGI Symbol;Acc:MGI:96603]
ENSMUSG00000024539	488.689	0.477632	0.0725464	6.58382	4.58523e-11	1.9322e-09	PTPN2	protein tyrosine phosphatase, non-receptor type 2 [Source:MGI Symbol;Acc:MGI:97806]
ENSMUSG00000034341	2730.3	-0.366418	0.0556721	-6.58173	4.65002e-11	1.95524e-09	WBP2	WW domain binding protein 2 [Source:MGI Symbol;Acc:MGI:104709]
ENSMUSG00000053687	33.9116	1.27655	0.194004	6.58003	4.70356e-11	1.97345e-09	DPEP2	dipeptidase 2 [Source:MGI Symbol;Acc:MGI:2442042]
ENSMUSG00000026958	1143.36	-0.487591	0.0741183	-6.57855	4.75051e-11	1.98882e-09	DPP7	dipeptidylpeptidase 7 [Source:MGI Symbol;Acc:MGI:1933213]
ENSMUSG00000090164	1512.35	0.715311	0.108791	6.57513	4.86122e-11	2.03077e-09	BC035044	cDNA sequence BC035044 [Source:MGI Symbol;Acc:MGI:2448540]
ENSMUSG00000078974	372.605	0.912266	0.138848	6.57024	5.02348e-11	2.09402e-09	SEC61G	SEC61, gamma subunit [Source:MGI Symbol;Acc:MGI:1202066]
ENSMUSG00000022587	16854.8	-0.475269	0.0723437	-6.56959	5.04527e-11	2.09857e-09	LY6E	lymphocyte antigen 6 complex, locus E [Source:MGI Symbol;Acc:MGI:106651]
ENSMUSG00000104599	15.3181	1.18412	0.18026	6.56895	5.06705e-11	2.1031e-09	AC154540.1	N/A
ENSMUSG00000056608	1901.49	0.510484	0.0777588	6.56497	5.20436e-11	2.15084e-09	CHD9	chromodomain helicase DNA binding protein 9 [Source:MGI Symbol;Acc:MGI:1924001]
ENSMUSG00000066684	23.6356	1.27718	0.194536	6.56525	5.1944e-11	2.15084e-09	PILRB1	paired immunoglobin-like type 2 receptor beta 1 [Source:MGI Symbol;Acc:MGI:2450532]
ENSMUSG00000079056	502.112	-0.622363	0.0948417	-6.56213	5.30458e-11	2.18757e-09	KCNIP3	Kv channel interacting protein 3, calsenilin [Source:MGI Symbol;Acc:MGI:1929258]
ENSMUSG00000001783	1575.52	-0.331646	0.050613	-6.55258	5.65518e-11	2.32223e-09	RTCB	RNA 2',3'-cyclic phosphate and 5'-OH ligase [Source:MGI Symbol;Acc:MGI:106379]
ENSMUSG00000024677	2094.45	0.657096	0.10028	6.55262	5.65378e-11	2.32223e-09	MS4A6B	membrane-spanning 4-domains, subfamily A, member 6B [Source:MGI Symbol;Acc:MGI:1917024]
ENSMUSG00000040033	703.441	-0.477777	0.0729196	-6.55211	5.67298e-11	2.3246e-09	STAT2	signal transducer and activator of transcription 2 [Source:MGI Symbol;Acc:MGI:103039]
ENSMUSG00000026123	1695.15	-0.401306	0.0612567	-6.55122	5.70678e-11	2.33349e-09	PLEKHB2	pleckstrin homology domain containing, family B (evectins) member 2 [Source:MGI Symbol;Acc:MGI:2385825]
ENSMUSG00000026357	26.5305	1.2454	0.19065	6.5324	6.47231e-11	2.64092e-09	RGS18	regulator of G-protein signaling 18 [Source:MGI Symbol;Acc:MGI:1927498]
ENSMUSG00000039316	245.854	-0.655718	0.100422	-6.52962	6.59383e-11	2.68483e-09	RFTN1	raftlin lipid raft linker 1 [Source:MGI Symbol;Acc:MGI:1923688]
ENSMUSG00000024158	581.377	0.489187	0.0749374	6.52795	6.66781e-11	2.70924e-09	HAGH	hydroxyacyl glutathione hydrolase [Source:MGI Symbol;Acc:MGI:95745]
ENSMUSG00000064267	5631.42	-0.46902	0.0718807	-6.52497	6.80153e-11	2.75776e-09	HVCN1	hydrogen voltage-gated channel 1 [Source:MGI Symbol;Acc:MGI:1921346]
ENSMUSG00000042462	281.921	0.775439	0.118933	6.51997	7.032e-11	2.84523e-09	DCTPP1	dCTP pyrophosphatase 1 [Source:MGI Symbol;Acc:MGI:1913672]
ENSMUSG00000038543	1032.83	0.73651	0.112992	6.51826	7.11268e-11	2.87186e-09	BC028528	cDNA sequence BC028528 [Source:MGI Symbol;Acc:MGI:2385885]
ENSMUSG00000069515	14.5272	1.25506	0.19335	6.4911	8.5212e-11	3.43339e-09	LYZ1	lysozyme 1 [Source:MGI Symbol;Acc:MGI:96902]
ENSMUSG00000087687	259.118	0.825882	0.12725	6.49022	8.57091e-11	3.44622e-09	PET100	PET100 homolog [Source:MGI Symbol;Acc:MGI:3615306]
ENSMUSG00000024317	559.123	0.460857	0.0710144	6.48964	8.60438e-11	3.45249e-09	RNF138	ring finger protein 138 [Source:MGI Symbol;Acc:MGI:1929211]
ENSMUSG00000027951	1080.32	-0.52762	0.0813898	-6.48262	9.01412e-11	3.60939e-09	ADAR	adenosine deaminase, RNA-specific [Source:MGI Symbol;Acc:MGI:1889575]
ENSMUSG00000040459	867.033	0.605838	0.0934739	6.48137	9.08963e-11	3.63209e-09	ARGLU1	arginine and glutamate rich 1 [Source:MGI Symbol;Acc:MGI:2442985]
ENSMUSG00000025085	321.584	-0.731528	0.112984	-6.4746	9.50649e-11	3.79081e-09	ABLIM1	actin-binding LIM protein 1 [Source:MGI Symbol;Acc:MGI:1194500]
ENSMUSG00000018042	675.586	-0.523113	0.0808727	-6.46835	9.90772e-11	3.94266e-09	CYB5R3	cytochrome b5 reductase 3 [Source:MGI Symbol;Acc:MGI:94893]
ENSMUSG00000020386	1424.54	0.614822	0.0951833	6.45934	1.05158e-10	4.17604e-09	SAR1B	secretion associated Ras related GTPase 1B [Source:MGI Symbol;Acc:MGI:1913647]
ENSMUSG00000047735	270.348	-0.87762	0.135875	-6.45903	1.05376e-10	4.1761e-09	SAMD9L	sterile alpha motif domain containing 9-like [Source:MGI Symbol;Acc:MGI:1343184]
ENSMUSG00000052776	250.465	-0.854695	0.132429	-6.45398	1.08947e-10	4.30878e-09	OAS1A	2'-5' oligoadenylate synthetase 1A [Source:MGI Symbol;Acc:MGI:2180860]
ENSMUSG00000070526	13.9547	-1.19026	0.184636	-6.44652	1.14451e-10	4.51718e-09	PEG12	paternally expressed 12 [Source:MGI Symbol;Acc:MGI:1351637]
ENSMUSG00000022332	988.813	-0.386486	0.0599774	-6.44386	1.16475e-10	4.5877e-09	KHDRBS3	KH domain containing, RNA binding, signal transduction associated 3 [Source:MGI Symbol;Acc:MGI:1313312]
ENSMUSG00000090105	6.73608	1.23949	0.192453	6.44047	1.19102e-10	4.68162e-09	GM15890	predicted gene 15890 [Source:MGI Symbol;Acc:MGI:3802160]
ENSMUSG00000069833	71.9019	1.24527	0.193428	6.43789	1.21146e-10	4.75226e-09	AHNAK	AHNAK nucleoprotein (desmoyokin) [Source:MGI Symbol;Acc:MGI:1316648]
ENSMUSG00000040249	6727.72	-0.711138	0.110504	-6.43541	1.23136e-10	4.82056e-09	LRP1	low density lipoprotein receptor-related protein 1 [Source:MGI Symbol;Acc:MGI:96828]
ENSMUSG00000107304	146.385	0.997757	0.155079	6.43388	1.24385e-10	4.85957e-09	GM43775	predicted gene 43775 [Source:MGI Symbol;Acc:MGI:5663912]
ENSMUSG00000028833	520.407	-0.573601	0.0891649	-6.43303	1.25085e-10	4.87706e-09	NCDN	neurochondrin [Source:MGI Symbol;Acc:MGI:1347351]
ENSMUSG00000005043	372.39	-0.626988	0.0974918	-6.43119	1.26609e-10	4.91855e-09	SGSH	N-sulfoglucosamine sulfohydrolase (sulfamidase) [Source:MGI Symbol;Acc:MGI:1350341]
ENSMUSG00000024668	431.402	0.499421	0.0776567	6.43113	1.26659e-10	4.91855e-09	SDHAF2	succinate dehydrogenase complex assembly factor 2 [Source:MGI Symbol;Acc:MGI:1913322]
ENSMUSG00000036977	276.317	0.617274	0.0960115	6.42917	1.28298e-10	4.97221e-09	ANAPC10	anaphase promoting complex subunit 10 [Source:MGI Symbol;Acc:MGI:1916249]
ENSMUSG00000085720	10.2893	1.23114	0.191611	6.42522	1.31679e-10	5.09298e-09	GM7854	predicted gene 7854 [Source:MGI Symbol;Acc:MGI:3648234]
ENSMUSG00000031444	4.58288	1.04226	0.162259	6.42343	1.33239e-10	5.14303e-09	F10	coagulation factor X [Source:MGI Symbol;Acc:MGI:103107]
ENSMUSG00000022820	366.518	0.822421	0.128223	6.41398	1.41773e-10	5.46153e-09	NDUFB4	NADH dehydrogenase (ubiquinone) 1 beta subcomplex 4 [Source:MGI Symbol;Acc:MGI:1915444]
ENSMUSG00000064109	141.74	0.640483	0.0999323	6.40917	1.46318e-10	5.62538e-09	HCST	hematopoietic cell signal transducer [Source:MGI Symbol;Acc:MGI:1344360]
ENSMUSG00000014195	3667.78	0.349305	0.0545075	6.40839	1.47068e-10	5.64296e-09	DNAJC7	DnaJ heat shock protein family (Hsp40) member C7 [Source:MGI Symbol;Acc:MGI:1928373]
ENSMUSG00000031613	6671.12	0.38816	0.060585	6.40687	1.48534e-10	5.68791e-09	HPGD	hydroxyprostaglandin dehydrogenase 15 (NAD) [Source:MGI Symbol;Acc:MGI:108085]
ENSMUSG00000100213	38.5048	-1.04296	0.162863	-6.40392	1.51437e-10	5.78759e-09	GM28151	predicted gene 28151 [Source:MGI Symbol;Acc:MGI:5578857]
ENSMUSG00000000290	9839.08	-0.335815	0.0525232	-6.39365	1.6197e-10	6.16571e-09	ITGB2	integrin beta 2 [Source:MGI Symbol;Acc:MGI:96611]
ENSMUSG00000028037	23.9142	-1.22285	0.191331	-6.39126	1.64529e-10	6.25081e-09	IFI44	interferon-induced protein 44 [Source:MGI Symbol;Acc:MGI:2443016]
ENSMUSG00000085762	13.0785	1.23544	0.193316	6.39079	1.65035e-10	6.2577e-09	LRRC75AOS2	leucine rich repeat containing 75A, opposite strand 2 [Source:MGI Symbol;Acc:MGI:1914079]
ENSMUSG00000019370	457.285	-0.600018	0.0939664	-6.38545	1.7089e-10	6.46699e-09	CALM3	calmodulin 3 [Source:MGI Symbol;Acc:MGI:103249]
ENSMUSG00000053334	352.37	-0.56558	0.0886827	-6.37757	1.79923e-10	6.79554e-09	FICD	FIC domain containing [Source:MGI Symbol;Acc:MGI:1098550]
ENSMUSG00000060143	357.746	0.885233	0.138895	6.37341	1.84874e-10	6.96889e-09	GM10076	predicted gene 10076 [Source:MGI Symbol;Acc:MGI:3704451]
ENSMUSG00000049130	3315.48	-0.598185	0.0938826	-6.37163	1.87035e-10	7.03658e-09	C5AR1	complement component 5a receptor 1 [Source:MGI Symbol;Acc:MGI:88232]
ENSMUSG00000014846	15.6926	1.23451	0.193836	6.36881	1.90498e-10	7.15296e-09	TPPP3	tubulin polymerization-promoting protein family member 3 [Source:MGI Symbol;Acc:MGI:1915221]
ENSMUSG00000071068	96.3594	-0.912825	0.143385	-6.36623	1.93731e-10	7.26019e-09	TREML2	triggering receptor expressed on myeloid cells-like 2 [Source:MGI Symbol;Acc:MGI:2147038]
ENSMUSG00000022246	39.5704	-1.17755	0.184997	-6.36521	1.95018e-10	7.28168e-09	RAI14	retinoic acid induced 14 [Source:MGI Symbol;Acc:MGI:1922896]
ENSMUSG00000030096	1878.54	-0.471456	0.0740679	-6.36518	1.95058e-10	7.28168e-09	SLC6A6	solute carrier family 6 (neurotransmitter transporter, taurine), member 6 [Source:MGI Symbol;Acc:MGI:98488]
ENSMUSG00000063281	522.788	0.469409	0.0738014	6.36043	2.01184e-10	7.49584e-09	ZFP35	zinc finger protein 35 [Source:MGI Symbol;Acc:MGI:99179]
ENSMUSG00000022130	224.655	0.576417	0.0906741	6.35702	2.05701e-10	7.64938e-09	TGDS	TDP-glucose 4,6-dehydratase [Source:MGI Symbol;Acc:MGI:1923605]
ENSMUSG00000066235	162.02	-0.752495	0.11844	-6.3534	2.10611e-10	7.81692e-09	POMGNT2	protein O-linked mannose beta 1,4-N-acetylglucosaminyltransferase 2 [Source:MGI Symbol;Acc:MGI:2143424]
ENSMUSG00000013076	139.747	-0.870845	0.137074	-6.3531	2.11017e-10	7.81694e-09	AMOTL1	angiomotin-like 1 [Source:MGI Symbol;Acc:MGI:1922973]
ENSMUSG00000028337	425.448	-0.625545	0.0984843	-6.35172	2.12914e-10	7.87212e-09	CORO2A	coronin, actin binding protein 2A [Source:MGI Symbol;Acc:MGI:1345966]
ENSMUSG00000044626	1428.03	-0.493349	0.0777292	-6.34702	2.19532e-10	8.10126e-09	LIPH	lipase, member H [Source:MGI Symbol;Acc:MGI:2388029]
ENSMUSG00000044229	14.3326	1.12364	0.177251	6.33925	2.30888e-10	8.50407e-09	NXPE4	neurexophilin and PC-esterase domain family, member 4 [Source:MGI Symbol;Acc:MGI:1924792]
ENSMUSG00000104940	32.8858	1.20003	0.189366	6.33711	2.34118e-10	8.60662e-09	GM42908	predicted gene 42908 [Source:MGI Symbol;Acc:MGI:5663045]
ENSMUSG00000022186	2936.17	-0.228046	0.0359883	-6.33667	2.34789e-10	8.61487e-09	OXCT1	3-oxoacid CoA transferase 1 [Source:MGI Symbol;Acc:MGI:1914291]
ENSMUSG00000049960	238.41	0.640926	0.10127	6.32886	2.46976e-10	9.04485e-09	MRPS16	mitochondrial ribosomal protein S16 [Source:MGI Symbol;Acc:MGI:1913492]
ENSMUSG00000030054	371.435	0.465467	0.0736594	6.31917	2.62965e-10	9.61217e-09	GP9	glycoprotein 9 (platelet) [Source:MGI Symbol;Acc:MGI:1860137]
ENSMUSG00000030330	1773.91	0.463866	0.0734114	6.31873	2.63728e-10	9.62182e-09	ING4	inhibitor of growth family, member 4 [Source:MGI Symbol;Acc:MGI:107307]
ENSMUSG00000052151	177.599	-0.62146	0.098508	-6.30873	2.8134e-10	1.0245e-08	PLPP2	phospholipid phosphatase 2 [Source:MGI Symbol;Acc:MGI:1354945]
ENSMUSG00000025893	155.92	0.783644	0.124281	6.3054	2.87458e-10	1.04481e-08	KBTBD3	kelch repeat and BTB (POZ) domain containing 3 [Source:MGI Symbol;Acc:MGI:1916399]
ENSMUSG00000003575	277.119	-0.546359	0.0866844	-6.30285	2.92217e-10	1.05866e-08	CRTC1	CREB regulated transcription coactivator 1 [Source:MGI Symbol;Acc:MGI:2142523]
ENSMUSG00000079316	297.354	0.585755	0.092936	6.30277	2.92365e-10	1.05866e-08	RAB9	RAB9, member RAS oncogene family [Source:MGI Symbol;Acc:MGI:1890695]
ENSMUSG00000037664	186.649	0.479839	0.0761451	6.30164	2.94508e-10	1.06442e-08	CDKN1C	cyclin-dependent kinase inhibitor 1C (P57) [Source:MGI Symbol;Acc:MGI:104564]
ENSMUSG00000044811	5058.91	0.518424	0.0822779	6.30089	2.9594e-10	1.0676e-08	CD300C2	CD300C molecule 2 [Source:MGI Symbol;Acc:MGI:2153249]
ENSMUSG00000030235	9.95455	1.11797	0.177557	6.29638	3.04671e-10	1.09704e-08	SLCO1C1	solute carrier organic anion transporter family, member 1c1 [Source:MGI Symbol;Acc:MGI:1889679]
ENSMUSG00000032609	1832.47	0.393158	0.0624892	6.29162	3.1418e-10	1.12917e-08	KLHDC8B	kelch domain containing 8B [Source:MGI Symbol;Acc:MGI:1925517]
ENSMUSG00000030750	465.653	0.649028	0.103235	6.28692	3.23827e-10	1.16168e-08	NSMCE1	NSE1 homolog, SMC5-SMC6 complex component [Source:MGI Symbol;Acc:MGI:1914961]
ENSMUSG00000096255	840.113	0.838368	0.133499	6.27994	3.38706e-10	1.21281e-08	DYNLT1B	dynein light chain Tctex-type 1B [Source:MGI Symbol;Acc:MGI:98643]
ENSMUSG00000026249	12468	-0.456551	0.0727551	-6.27518	3.49234e-10	1.24819e-08	SERPINE2	serine (or cysteine) peptidase inhibitor, clade E, member 2 [Source:MGI Symbol;Acc:MGI:101780]
ENSMUSG00000078853	1304.31	-0.426306	0.0679881	-6.2703	3.60354e-10	1.28555e-08	IGTP	interferon gamma induced GTPase [Source:MGI Symbol;Acc:MGI:107729]
ENSMUSG00000025190	383.25	-0.482282	0.0769234	-6.26964	3.61878e-10	1.28861e-08	GOT1	glutamic-oxaloacetic transaminase 1, soluble [Source:MGI Symbol;Acc:MGI:95791]
ENSMUSG00000024659	228.024	1.08508	0.17324	6.26346	3.76522e-10	1.33622e-08	ANXA1	annexin A1 [Source:MGI Symbol;Acc:MGI:96819]
ENSMUSG00000090136	267.916	0.926309	0.147892	6.26342	3.76635e-10	1.33622e-08	GM10177	predicted gene 10177 [Source:MGI Symbol;Acc:MGI:3704330]
ENSMUSG00000075705	76.7047	0.949633	0.151664	6.26142	3.81491e-10	1.35097e-08	MSRB1	methionine sulfoxide reductase B1 [Source:MGI Symbol;Acc:MGI:1351642]
ENSMUSG00000019087	9002.02	-0.34178	0.0546008	-6.25961	3.85932e-10	1.36419e-08	ATP6AP1	ATPase, H+ transporting, lysosomal accessory protein 1 [Source:MGI Symbol;Acc:MGI:109629]
ENSMUSG00000029096	269.35	-0.707867	0.113125	-6.25738	3.91489e-10	1.3813e-08	HTRA3	HtrA serine peptidase 3 [Source:MGI Symbol;Acc:MGI:1925808]
ENSMUSG00000046844	12.7518	1.1157	0.178372	6.25487	3.97853e-10	1.4012e-08	VAT1L	vesicle amine transport protein 1 like [Source:MGI Symbol;Acc:MGI:2142534]
ENSMUSG00000027376	30.265	-1.2029	0.192366	-6.25315	4.02245e-10	1.41409e-08	PROM2	prominin 2 [Source:MGI Symbol;Acc:MGI:2138997]
ENSMUSG00000063179	191.63	0.804831	0.128762	6.25053	4.09071e-10	1.43547e-08	PSTK	phosphoseryl-tRNA kinase [Source:MGI Symbol;Acc:MGI:2685945]
ENSMUSG00000038607	5900.6	0.706826	0.11325	6.24129	4.33985e-10	1.52013e-08	GNG10	guanine nucleotide binding protein (G protein), gamma 10 [Source:MGI Symbol;Acc:MGI:1336169]
ENSMUSG00000024053	82.3189	1.15999	0.185897	6.23998	4.37641e-10	1.53016e-08	EMILIN2	elastin microfibril interfacer 2 [Source:MGI Symbol;Acc:MGI:2389136]
ENSMUSG00000030530	1576.39	-0.382385	0.0612919	-6.23876	4.41067e-10	1.53555e-08	FURIN	furin (paired basic amino acid cleaving enzyme) [Source:MGI Symbol;Acc:MGI:97513]
ENSMUSG00000050708	21052.5	-0.446964	0.0716446	-6.23863	4.41433e-10	1.53555e-08	FTL1	ferritin light polypeptide 1 [Source:MGI Symbol;Acc:MGI:95589]
ENSMUSG00000096243	9.47723	1.1271	0.180667	6.23858	4.4157e-10	1.53555e-08	GM24265	predicted gene, 24265 [Source:MGI Symbol;Acc:MGI:5454042]
ENSMUSG00000022098	127.633	0.836193	0.134063	6.23734	4.45079e-10	1.54497e-08	BMP1	bone morphogenetic protein 1 [Source:MGI Symbol;Acc:MGI:88176]
ENSMUSG00000101585	147.14	0.856071	0.137282	6.23586	4.49293e-10	1.55679e-08	1600010M07RIK	RIKEN cDNA 1600010M07 gene [Source:MGI Symbol;Acc:MGI:1917031]
ENSMUSG00000031740	688.096	-0.555115	0.0890991	-6.23032	4.65497e-10	1.61005e-08	MMP2	matrix metallopeptidase 2 [Source:MGI Symbol;Acc:MGI:97009]
ENSMUSG00000033721	20.6163	1.20312	0.193152	6.22888	4.69794e-10	1.62201e-08	VAV3	vav 3 oncogene [Source:MGI Symbol;Acc:MGI:1888518]
ENSMUSG00000075486	571.106	0.575928	0.0925259	6.22451	4.83074e-10	1.66488e-08	COMMD6	COMM domain containing 6 [Source:MGI Symbol;Acc:MGI:1913450]
ENSMUSG00000054717	472.838	0.511506	0.0822453	6.21928	4.99445e-10	1.71823e-08	HMGB2	high mobility group box 2 [Source:MGI Symbol;Acc:MGI:96157]
ENSMUSG00000002731	235.337	0.51829	0.0833975	6.21469	5.1425e-10	1.76602e-08	PRKRA	protein kinase, interferon inducible double stranded RNA dependent activator [Source:MGI Symbol;Acc:MGI:1344375]
ENSMUSG00000006411	823.942	-0.567967	0.091403	-6.21387	5.1694e-10	1.7721e-08	NECTIN4	nectin cell adhesion molecule 4 [Source:MGI Symbol;Acc:MGI:1918990]
ENSMUSG00000061461	420.109	0.653486	0.105214	6.211	5.26487e-10	1.80163e-08	SMIM20	small integral membrane protein 20 [Source:MGI Symbol;Acc:MGI:1913528]
ENSMUSG00000008035	2208.92	-0.403544	0.065058	-6.20283	5.54577e-10	1.8944e-08	MID1IP1	Mid1 interacting protein 1 (gastrulation specific G12-like (zebrafish)) [Source:MGI Symbol;Acc:MGI:1915291]
ENSMUSG00000001627	490.422	0.521304	0.0840666	6.20108	5.60778e-10	1.91219e-08	IFRD1	interferon-related developmental regulator 1 [Source:MGI Symbol;Acc:MGI:1316717]
ENSMUSG00000026875	14.8837	1.20459	0.194417	6.19593	5.79429e-10	1.97231e-08	TRAF1	TNF receptor-associated factor 1 [Source:MGI Symbol;Acc:MGI:101836]
ENSMUSG00000040616	21.8192	1.16023	0.187276	6.19531	5.81716e-10	1.97661e-08	TMEM51	transmembrane protein 51 [Source:MGI Symbol;Acc:MGI:2384874]
ENSMUSG00000037860	772.497	0.510793	0.0825277	6.18935	6.04126e-10	2.04914e-08	AIM2	absent in melanoma 2 [Source:MGI Symbol;Acc:MGI:2686159]
ENSMUSG00000033450	2393.11	0.635485	0.102686	6.18862	6.06943e-10	2.05509e-08	TAGAP	T cell activation Rho GTPase activating protein [Source:MGI Symbol;Acc:MGI:3615484]
ENSMUSG00000001473	286.255	-0.545139	0.0881019	-6.18759	6.10894e-10	2.06123e-08	TUBB6	tubulin, beta 6 class V [Source:MGI Symbol;Acc:MGI:1915201]
ENSMUSG00000026158	1745.55	-0.360315	0.0582312	-6.18767	6.106e-10	2.06123e-08	OGFRL1	opioid growth factor receptor-like 1 [Source:MGI Symbol;Acc:MGI:1917405]
ENSMUSG00000032554	28631.5	-0.354326	0.0572841	-6.18541	6.19394e-10	2.08627e-08	TRF	transferrin [Source:MGI Symbol;Acc:MGI:98821]
ENSMUSG00000052270	10.3625	1.04565	0.169113	6.18314	6.284e-10	2.11291e-08	FPR2	formyl peptide receptor 2 [Source:MGI Symbol;Acc:MGI:1278319]
ENSMUSG00000054850	227.419	0.700717	0.113392	6.1796	6.42631e-10	2.15701e-08	SMIM10L2A	small integral membrane protein 10 like 2A [Source:MGI Symbol;Acc:MGI:2443645]
ENSMUSG00000000204	35.1313	0.994269	0.160922	6.17857	6.4683e-10	2.16733e-08	SLFN4	schlafen 4 [Source:MGI Symbol;Acc:MGI:1329010]
ENSMUSG00000051234	1318.03	0.648541	0.105084	6.17164	6.75851e-10	2.26064e-08	RNF7	ring finger protein 7 [Source:MGI Symbol;Acc:MGI:1337096]
ENSMUSG00000090258	336.31	0.830335	0.13471	6.16385	7.0996e-10	2.37063e-08	CHURC1	churchill domain containing 1 [Source:MGI Symbol;Acc:MGI:1923684]
ENSMUSG00000086922	206.529	0.701291	0.113805	6.16224	7.17228e-10	2.39076e-08	GM13835	predicted gene 13835 [Source:MGI Symbol;Acc:MGI:3650921]
ENSMUSG00000091275	161.404	0.792659	0.128652	6.16124	7.21752e-10	2.40169e-08	GM3248	predicted gene 3248 [Source:MGI Symbol;Acc:MGI:3781426]
ENSMUSG00000023805	189.138	-0.829222	0.134725	-6.15492	7.51149e-10	2.49521e-08	SYNJ2	synaptojanin 2 [Source:MGI Symbol;Acc:MGI:1201671]
ENSMUSG00000020589	541.482	-0.648062	0.1053	-6.15443	7.53476e-10	2.49864e-08	FAM49A	family with sequence similarity 49, member A [Source:MGI Symbol;Acc:MGI:1261783]
ENSMUSG00000029911	1386.47	0.553476	0.0899367	6.15406	7.5524e-10	2.50019e-08	SSBP1	single-stranded DNA binding protein 1 [Source:MGI Symbol;Acc:MGI:1920040]
ENSMUSG00000002325	1391.18	-0.354552	0.057623	-6.15296	7.60489e-10	2.51112e-08	IRF9	interferon regulatory factor 9 [Source:MGI Symbol;Acc:MGI:107587]
ENSMUSG00000026360	7231.09	0.277156	0.0450453	6.15283	7.61142e-10	2.51112e-08	RGS2	regulator of G-protein signaling 2 [Source:MGI Symbol;Acc:MGI:1098271]
ENSMUSG00000048621	7.69802	1.0997	0.178795	6.15062	7.71823e-10	2.54201e-08	GM6377	predicted gene 6377 [Source:MGI Symbol;Acc:MGI:3647255]
ENSMUSG00000021519	691.1	0.572569	0.093103	6.14985	7.75574e-10	2.55001e-08	MTERF3	mitochondrial transcription termination factor 3 [Source:MGI Symbol;Acc:MGI:1913660]
ENSMUSG00000020526	228.49	0.866951	0.141287	6.13608	8.45833e-10	2.77629e-08	ZNHIT3	zinc finger, HIT type 3 [Source:MGI Symbol;Acc:MGI:3051596]
ENSMUSG00000025351	5652.26	-0.458474	0.0748674	-6.12381	9.13615e-10	2.99368e-08	CD63	CD63 antigen [Source:MGI Symbol;Acc:MGI:99529]
ENSMUSG00000038776	373.297	-0.533933	0.0872211	-6.1216	9.2642e-10	3.02711e-08	EPHX1	epoxide hydrolase 1, microsomal [Source:MGI Symbol;Acc:MGI:95405]
ENSMUSG00000060073	2247.78	0.575437	0.0940025	6.12151	9.26955e-10	3.02711e-08	PSMA3	proteasome (prosome, macropain) subunit, alpha type 3 [Source:MGI Symbol;Acc:MGI:104883]
ENSMUSG00000014856	1010.58	0.644844	0.105395	6.11834	9.45553e-10	3.08013e-08	TMEM208	transmembrane protein 208 [Source:MGI Symbol;Acc:MGI:1913570]
ENSMUSG00000031431	2126.28	1.02693	0.167849	6.1182	9.46383e-10	3.08013e-08	TSC22D3	TSC22 domain family, member 3 [Source:MGI Symbol;Acc:MGI:1196284]
ENSMUSG00000055413	62.2695	-0.897284	0.146676	-6.11746	9.50757e-10	3.08916e-08	H2-Q5	histocompatibility 2, Q region locus 5 [Source:MGI Symbol;Acc:MGI:95934]
ENSMUSG00000036580	1670.92	-0.436258	0.0713659	-6.11298	9.77895e-10	3.17199e-08	SPG20	spastic paraplegia 20, spartin (Troyer syndrome) homolog (human) [Source:MGI Symbol;Acc:MGI:2139806]
ENSMUSG00000031996	2284.72	-0.432847	0.0708344	-6.11068	9.92048e-10	3.21251e-08	APLP2	amyloid beta (A4) precursor-like protein 2 [Source:MGI Symbol;Acc:MGI:88047]
ENSMUSG00000027748	2.9451	-1.02157	0.167288	-6.10669	1.01718e-09	3.28839e-08	TRPC4	transient receptor potential cation channel, subfamily C, member 4 [Source:MGI Symbol;Acc:MGI:109525]
ENSMUSG00000034947	751.889	-0.467835	0.0767009	-6.09948	1.06416e-09	3.43451e-08	TMEM106A	transmembrane protein 106A [Source:MGI Symbol;Acc:MGI:1922056]
ENSMUSG00000057666	4427.52	-0.425899	0.069861	-6.09637	1.08505e-09	3.49606e-08	GAPDH	glyceraldehyde-3-phosphate dehydrogenase [Source:MGI Symbol;Acc:MGI:95640]
ENSMUSG00000005823	1602.42	-0.270479	0.044395	-6.09255	1.11126e-09	3.57456e-08	GPR108	G protein-coupled receptor 108 [Source:MGI Symbol;Acc:MGI:1925558]
ENSMUSG00000016252	649.026	0.937461	0.153891	6.09173	1.11697e-09	3.5833e-08	ATP5E	ATP synthase, H+ transporting, mitochondrial F1 complex, epsilon subunit [Source:MGI Symbol;Acc:MGI:1855697]
ENSMUSG00000017737	208.562	1.00618	0.165174	6.09163	1.11769e-09	3.5833e-08	MMP9	matrix metallopeptidase 9 [Source:MGI Symbol;Acc:MGI:97011]
ENSMUSG00000019188	1716.62	-0.336686	0.055277	-6.0909	1.12281e-09	3.59373e-08	H13	histocompatibility 13 [Source:MGI Symbol;Acc:MGI:95886]
ENSMUSG00000000134	3328.56	-0.335207	0.0550829	-6.08549	1.16136e-09	3.70484e-08	TFE3	transcription factor E3 [Source:MGI Symbol;Acc:MGI:98511]
ENSMUSG00000019843	254.099	0.758295	0.124603	6.08567	1.16004e-09	3.70484e-08	FYN	Fyn proto-oncogene [Source:MGI Symbol;Acc:MGI:95602]
ENSMUSG00000022607	95.1216	-0.918185	0.150896	-6.08488	1.1658e-09	3.71286e-08	PTK2	PTK2 protein tyrosine kinase 2 [Source:MGI Symbol;Acc:MGI:95481]
ENSMUSG00000092837	14.4328	1.18003	0.194028	6.08177	1.18865e-09	3.7794e-08	RPPH1	ribonuclease P RNA component H1 [Source:MGI Symbol;Acc:MGI:1934664]
ENSMUSG00000029672	1248.96	-0.416661	0.0685604	-6.07728	1.22235e-09	3.88015e-08	FAM3C	family with sequence similarity 3, member C [Source:MGI Symbol;Acc:MGI:107892]
ENSMUSG00000025290	544.577	0.770472	0.126941	6.06955	1.28272e-09	4.06511e-08	RPS24	ribosomal protein S24 [Source:MGI Symbol;Acc:MGI:98147]
ENSMUSG00000029816	22.6963	-1.11821	0.184255	-6.0688	1.2887e-09	4.07735e-08	GPNMB	glycoprotein (transmembrane) nmb [Source:MGI Symbol;Acc:MGI:1934765]
ENSMUSG00000069272	43.7586	1.02065	0.168213	6.06761	1.29832e-09	4.10106e-08	HIST1H2AE	histone cluster 1, H2ae [Source:MGI Symbol;Acc:MGI:2448290]
ENSMUSG00000045268	383.338	0.802342	0.132515	6.05472	1.40663e-09	4.43593e-08	ZFP691	zinc finger protein 691 [Source:MGI Symbol;Acc:MGI:3041163]
ENSMUSG00000032673	437.46	0.52366	0.0865042	6.05358	1.41665e-09	4.46025e-08	PRORSD1	prolyl-tRNA synthetase domain containing 1 [Source:MGI Symbol;Acc:MGI:1915189]
ENSMUSG00000070348	411.643	-0.876869	0.144934	-6.05012	1.44739e-09	4.54961e-08	CCND1	cyclin D1 [Source:MGI Symbol;Acc:MGI:88313]
ENSMUSG00000038642	91605.5	-0.368689	0.0609699	-6.04707	1.47506e-09	4.62905e-08	CTSS	cathepsin S [Source:MGI Symbol;Acc:MGI:107341]
ENSMUSG00000074743	18.7517	1.17049	0.19379	6.03999	1.54124e-09	4.82887e-08	THBD	thrombomodulin [Source:MGI Symbol;Acc:MGI:98736]
ENSMUSG00000015149	1433.14	-0.432618	0.0716427	-6.03855	1.55505e-09	4.86424e-08	SIRT2	sirtuin 2 [Source:MGI Symbol;Acc:MGI:1927664]
ENSMUSG00000021028	367.67	0.635434	0.105346	6.03188	1.62061e-09	5.06114e-08	MBIP	MAP3K12 binding inhibitory protein 1 [Source:MGI Symbol;Acc:MGI:1918320]
ENSMUSG00000058773	4.63733	1.0924	0.181306	6.02516	1.68946e-09	5.26761e-08	HIST1H1B	histone cluster 1, H1b [Source:MGI Symbol;Acc:MGI:1861461]
ENSMUSG00000030451	2346.1	-0.481174	0.0798717	-6.02434	1.69798e-09	5.28563e-08	HERC2	HECT and RLD domain containing E3 ubiquitin protein ligase 2 [Source:MGI Symbol;Acc:MGI:103234]
ENSMUSG00000020310	6.30083	-1.06873	0.177512	-6.02061	1.73766e-09	5.39942e-08	MADCAM1	mucosal vascular addressin cell adhesion molecule 1 [Source:MGI Symbol;Acc:MGI:103579]
ENSMUSG00000101555	11.5609	1.15548	0.191928	6.02038	1.74012e-09	5.39942e-08	GM28731	predicted gene 28731 [Source:MGI Symbol;Acc:MGI:5579437]
ENSMUSG00000073435	255.05	0.714199	0.118731	6.01528	1.79579e-09	5.5632e-08	NME3	NME/NM23 nucleoside diphosphate kinase 3 [Source:MGI Symbol;Acc:MGI:1930182]
ENSMUSG00000034445	2405.14	-0.34315	0.0570576	-6.0141	1.8089e-09	5.59484e-08	CYB561A3	cytochrome b561 family, member A3 [Source:MGI Symbol;Acc:MGI:2686925]
ENSMUSG00000066442	550.506	0.5318	0.0885031	6.00883	1.86869e-09	5.77053e-08	MTHFS	5, 10-methenyltetrahydrofolate synthetase [Source:MGI Symbol;Acc:MGI:1340032]
ENSMUSG00000079427	443.136	0.610815	0.101741	6.00363	1.92951e-09	5.94881e-08	MTHFSL	5, 10-methenyltetrahydrofolate synthetase-like [Source:MGI Symbol;Acc:MGI:3780550]
ENSMUSG00000044252	550.451	-0.418291	0.0696849	-6.0026	1.94178e-09	5.97709e-08	OSBPL1A	oxysterol binding protein-like 1A [Source:MGI Symbol;Acc:MGI:1927551]
ENSMUSG00000046223	274.331	-0.809184	0.134899	-5.99844	1.99222e-09	6.12259e-08	PLAUR	plasminogen activator, urokinase receptor [Source:MGI Symbol;Acc:MGI:97612]
ENSMUSG00000014313	856.819	0.589446	0.0983157	5.99544	2.02937e-09	6.2071e-08	COX6C	cytochrome c oxidase subunit VIc [Source:MGI Symbol;Acc:MGI:104614]
ENSMUSG00000022537	763.202	0.631062	0.10525	5.99581	2.02468e-09	6.2071e-08	TMEM44	transmembrane protein 44 [Source:MGI Symbol;Acc:MGI:1924489]
ENSMUSG00000032246	7.47479	0.996474	0.166199	5.99565	2.02672e-09	6.2071e-08	CALML4	calmodulin-like 4 [Source:MGI Symbol;Acc:MGI:1922850]
ENSMUSG00000028041	5425.15	-0.292257	0.0488053	-5.98822	2.12154e-09	6.4656e-08	ADAM15	a disintegrin and metallopeptidase domain 15 (metargidin) [Source:MGI Symbol;Acc:MGI:1333882]
ENSMUSG00000030748	3526.07	-0.364455	0.0608646	-5.98796	2.12483e-09	6.4656e-08	IL4RA	interleukin 4 receptor, alpha [Source:MGI Symbol;Acc:MGI:105367]
ENSMUSG00000039016	352.576	0.774376	0.129326	5.98778	2.12728e-09	6.4656e-08	TIMM8B	translocase of inner mitochondrial membrane 8B [Source:MGI Symbol;Acc:MGI:1353424]
ENSMUSG00000047824	1206.83	-0.333295	0.055656	-5.98848	2.11812e-09	6.4656e-08	PYGO2	pygopus 2 [Source:MGI Symbol;Acc:MGI:1916161]
ENSMUSG00000008682	2202.28	0.466158	0.0778613	5.98703	2.13708e-09	6.48517e-08	RPL10	ribosomal protein L10 [Source:MGI Symbol;Acc:MGI:105943]
ENSMUSG00000074794	1095.76	0.628656	0.105087	5.98222	2.20114e-09	6.66907e-08	ARRDC3	arrestin domain containing 3 [Source:MGI Symbol;Acc:MGI:2145242]
ENSMUSG00000030291	399.785	0.62287	0.104147	5.98069	2.22191e-09	6.72145e-08	MED21	mediator complex subunit 21 [Source:MGI Symbol;Acc:MGI:1347064]
ENSMUSG00000030830	77.6723	1.14101	0.190857	5.97834	2.25421e-09	6.80849e-08	ITGAL	integrin alpha L [Source:MGI Symbol;Acc:MGI:96606]
ENSMUSG00000044103	9.29307	0.929436	0.15552	5.97631	2.28251e-09	6.88319e-08	IL1F9	interleukin 1 family, member 9 [Source:MGI Symbol;Acc:MGI:2449929]
ENSMUSG00000092593	18.6556	1.08214	0.181153	5.9736	2.32071e-09	6.98748e-08	GM20492	predicted gene 20492 [Source:MGI Symbol;Acc:MGI:5141957]
ENSMUSG00000053453	327.748	0.575869	0.0964603	5.97001	2.37246e-09	7.13215e-08	THOC7	THO complex 7 [Source:MGI Symbol;Acc:MGI:1913481]
ENSMUSG00000032231	142.37	1.14634	0.192235	5.96322	2.47317e-09	7.42337e-08	ANXA2	annexin A2 [Source:MGI Symbol;Acc:MGI:88246]
ENSMUSG00000076036	120.862	-0.674986	0.113213	-5.96207	2.49055e-09	7.46393e-08	GM22133	predicted gene, 22133 [Source:MGI Symbol;Acc:MGI:5451910]
ENSMUSG00000071724	541.771	0.540709	0.0907455	5.95853	2.54525e-09	7.61601e-08	SMPD5	sphingomyelin phosphodiesterase 5 [Source:MGI Symbol;Acc:MGI:3709877]
ENSMUSG00000002870	178.388	-0.766886	0.128721	-5.95774	2.55744e-09	7.63476e-08	MCM2	minichromosome maintenance complex component 2 [Source:MGI Symbol;Acc:MGI:105380]
ENSMUSG00000096039	145.194	0.600584	0.100809	5.95762	2.55943e-09	7.63476e-08	D830030K20RIK	RIKEN cDNA D830030K20 gene [Source:MGI Symbol;Acc:MGI:2443830]
ENSMUSG00000022515	687.255	0.453208	0.0760889	5.95629	2.58021e-09	7.68489e-08	ANKS3	ankyrin repeat and sterile alpha motif domain containing 3 [Source:MGI Symbol;Acc:MGI:1919865]
ENSMUSG00000003882	383.755	0.59674	0.100198	5.95559	2.59139e-09	7.70628e-08	IL7R	interleukin 7 receptor [Source:MGI Symbol;Acc:MGI:96562]
ENSMUSG00000025876	64.0742	-1.01271	0.170079	-5.95439	2.61052e-09	7.75122e-08	UNC5A	unc-5 netrin receptor A [Source:MGI Symbol;Acc:MGI:894682]
ENSMUSG00000025498	300.749	-0.792203	0.133107	-5.95162	2.65508e-09	7.87145e-08	IRF7	interferon regulatory factor 7 [Source:MGI Symbol;Acc:MGI:1859212]
ENSMUSG00000022540	2960.44	0.219753	0.036929	5.9507	2.66991e-09	7.90327e-08	ROGDI	rogdi homolog [Source:MGI Symbol;Acc:MGI:1913299]
ENSMUSG00000046006	13.1451	1.14334	0.192153	5.95018	2.67848e-09	7.9165e-08	GAPT	Grb2-binding adaptor, transmembrane [Source:MGI Symbol;Acc:MGI:3608341]
ENSMUSG00000020267	693.215	0.647447	0.108866	5.94717	2.72821e-09	8.05114e-08	HINT1	histidine triad nucleotide binding protein 1 [Source:MGI Symbol;Acc:MGI:1321133]
ENSMUSG00000027878	899.231	-0.674214	0.113413	-5.94477	2.76843e-09	8.15735e-08	NOTCH2	notch 2 [Source:MGI Symbol;Acc:MGI:97364]
ENSMUSG00000029648	29.4414	-1.15617	0.194609	-5.94097	2.83347e-09	8.33628e-08	FLT1	FMS-like tyrosine kinase 1 [Source:MGI Symbol;Acc:MGI:95558]
ENSMUSG00000021361	1150.47	0.531605	0.0895373	5.93725	2.89845e-09	8.51447e-08	TMEM14C	transmembrane protein 14C [Source:MGI Symbol;Acc:MGI:1913404]
ENSMUSG00000020785	448.976	-0.524239	0.0883273	-5.93518	2.93522e-09	8.59631e-08	CAMKK1	calcium/calmodulin-dependent protein kinase kinase 1, alpha [Source:MGI Symbol;Acc:MGI:1891766]
ENSMUSG00000063077	657.232	-0.580392	0.0977858	-5.93534	2.93237e-09	8.59631e-08	KIF1B	kinesin family member 1B [Source:MGI Symbol;Acc:MGI:108426]
ENSMUSG00000024962	454.396	-0.446785	0.0753409	-5.93018	3.02605e-09	8.84891e-08	VEGFB	vascular endothelial growth factor B [Source:MGI Symbol;Acc:MGI:106199]
ENSMUSG00000010607	237.397	0.563733	0.0951002	5.92778	3.07054e-09	8.96542e-08	PIGYL	phosphatidylinositol glycan anchor biosynthesis, class Y-like [Source:MGI Symbol;Acc:MGI:1913518]
ENSMUSG00000061306	4008.73	-0.467217	0.07886	-5.92463	3.13001e-09	9.11149e-08	SLC38A10	solute carrier family 38, member 10 [Source:MGI Symbol;Acc:MGI:1919305]
ENSMUSG00000064351	9121.07	0.450204	0.0759871	5.92474	3.12797e-09	9.11149e-08	MT-CO1	mitochondrially encoded cytochrome c oxidase I [Source:MGI Symbol;Acc:MGI:102504]
ENSMUSG00000063354	183.062	-0.836333	0.141197	-5.92316	3.15821e-09	9.17974e-08	SLC39A4	solute carrier family 39 (zinc transporter), member 4 [Source:MGI Symbol;Acc:MGI:1919277]
ENSMUSG00000100017	215.631	0.714267	0.120646	5.92036	3.21231e-09	9.32294e-08	2410022M11RIK	RIKEN cDNA 2410022M11 gene [Source:MGI Symbol;Acc:MGI:1917005]
ENSMUSG00000031494	112.303	1.13574	0.191913	5.91797	3.25939e-09	9.44537e-08	CD209A	CD209a antigen [Source:MGI Symbol;Acc:MGI:2157942]
ENSMUSG00000001289	673.251	0.772189	0.130507	5.91683	3.28213e-09	9.49703e-08	PFDN5	prefoldin 5 [Source:MGI Symbol;Acc:MGI:1928753]
ENSMUSG00000069089	557.851	0.362439	0.0613381	5.90886	3.44483e-09	9.95288e-08	CDK7	cyclin-dependent kinase 7 [Source:MGI Symbol;Acc:MGI:102956]
ENSMUSG00000044876	304.139	-0.441948	0.0748292	-5.90609	3.50329e-09	1.01066e-07	ZFP444	zinc finger protein 444 [Source:MGI Symbol;Acc:MGI:1923365]
ENSMUSG00000036513	563.317	0.716666	0.121352	5.9057	3.51153e-09	1.01153e-07	COMMD2	COMM domain containing 2 [Source:MGI Symbol;Acc:MGI:1098806]
ENSMUSG00000025413	707.247	0.459746	0.0778634	5.90452	3.53677e-09	1.01728e-07	TTC4	tetratricopeptide repeat domain 4 [Source:MGI Symbol;Acc:MGI:1919604]
ENSMUSG00000045092	1557.59	-0.530043	0.08979	-5.90314	3.56653e-09	1.02431e-07	S1PR1	sphingosine-1-phosphate receptor 1 [Source:MGI Symbol;Acc:MGI:1096355]
ENSMUSG00000015745	2570.45	0.365902	0.062036	5.89823	3.67426e-09	1.05369e-07	PLEKHO1	pleckstrin homology domain containing, family O member 1 [Source:MGI Symbol;Acc:MGI:1914470]
ENSMUSG00000023043	4.98779	1.06601	0.180938	5.89159	3.82507e-09	1.09531e-07	KRT18	keratin 18 [Source:MGI Symbol;Acc:MGI:96692]
ENSMUSG00000031146	27.2606	1.11191	0.188793	5.88958	3.87186e-09	1.10706e-07	PLP2	proteolipid protein 2 [Source:MGI Symbol;Acc:MGI:1298382]
ENSMUSG00000022584	68.5953	0.941978	0.160005	5.88717	3.92863e-09	1.11833e-07	LY6C2	lymphocyte antigen 6 complex, locus C2 [Source:MGI Symbol;Acc:MGI:3712069]
ENSMUSG00000032000	715.561	0.32761	0.0556461	5.88738	3.92363e-09	1.11833e-07	BIRC3	baculoviral IAP repeat-containing 3 [Source:MGI Symbol;Acc:MGI:1197007]
ENSMUSG00000062248	123.405	0.627083	0.106515	5.88726	3.92653e-09	1.11833e-07	CKS2	CDC28 protein kinase regulatory subunit 2 [Source:MGI Symbol;Acc:MGI:1913447]
ENSMUSG00000059534	581.733	0.734758	0.124943	5.88077	4.08367e-09	1.16075e-07	UQCR10	ubiquinol-cytochrome c reductase, complex III subunit X [Source:MGI Symbol;Acc:MGI:1913402]
ENSMUSG00000066026	2484.86	-0.372392	0.063329	-5.88027	4.09607e-09	1.16256e-07	DHRS3	dehydrogenase/reductase (SDR family) member 3 [Source:MGI Symbol;Acc:MGI:1315215]
ENSMUSG00000045382	10.9607	1.14258	0.194395	5.87761	4.16239e-09	1.17882e-07	CXCR4	chemokine (C-X-C motif) receptor 4 [Source:MGI Symbol;Acc:MGI:109563]
ENSMUSG00000062082	33.3559	-0.999284	0.170019	-5.87748	4.16556e-09	1.17882e-07	CD200R4	CD200 receptor 4 [Source:MGI Symbol;Acc:MGI:3036289]
ENSMUSG00000079445	105.701	-0.95867	0.163175	-5.8751	4.22594e-09	1.19415e-07	B3GNT7	UDP-GlcNAc:betaGal beta-1,3-N-acetylglucosaminyltransferase 7 [Source:MGI Symbol;Acc:MGI:2384394]
ENSMUSG00000029053	115.957	-0.629094	0.107188	-5.8691	4.38175e-09	1.23637e-07	PRKCZ	protein kinase C, zeta [Source:MGI Symbol;Acc:MGI:97602]
ENSMUSG00000039942	60.8125	-0.973804	0.16608	-5.86347	4.53284e-09	1.27714e-07	PTGER4	prostaglandin E receptor 4 (subtype EP4) [Source:MGI Symbol;Acc:MGI:104311]
ENSMUSG00000039233	474.411	0.489087	0.0834276	5.86241	4.562e-09	1.28348e-07	TBCE	tubulin-specific chaperone E [Source:MGI Symbol;Acc:MGI:1917680]
ENSMUSG00000009633	20.1306	1.09435	0.186865	5.85638	4.7307e-09	1.329e-07	G0S2	G0/G1 switch gene 2 [Source:MGI Symbol;Acc:MGI:1316737]
ENSMUSG00000090266	685.83	0.683289	0.11677	5.85156	4.86977e-09	1.36608e-07	METTL23	methyltransferase like 23 [Source:MGI Symbol;Acc:MGI:1921569]
ENSMUSG00000020397	952.505	0.387096	0.0661777	5.84934	4.93535e-09	1.38184e-07	MED7	mediator complex subunit 7 [Source:MGI Symbol;Acc:MGI:1913463]
ENSMUSG00000031231	577.264	0.670199	0.11458	5.84917	4.94027e-09	1.38184e-07	COX7B	cytochrome c oxidase subunit VIIb [Source:MGI Symbol;Acc:MGI:1913392]
ENSMUSG00000026483	711.291	-0.643102	0.11001	-5.84585	5.03976e-09	1.40763e-07	FAM129A	family with sequence similarity 129, member A [Source:MGI Symbol;Acc:MGI:2137237]
ENSMUSG00000018800	15.2028	-1.13626	0.194419	-5.84437	5.08493e-09	1.41819e-07	ABCA5	ATP-binding cassette, sub-family A (ABC1), member 5 [Source:MGI Symbol;Acc:MGI:2386607]
ENSMUSG00000030165	76.3496	0.988522	0.169162	5.84366	5.10677e-09	1.42223e-07	KLRD1	killer cell lectin-like receptor, subfamily D, member 1 [Source:MGI Symbol;Acc:MGI:1196275]
ENSMUSG00000048583	8.678	1.05211	0.180229	5.83761	5.29538e-09	1.47264e-07	IGF2	insulin-like growth factor 2 [Source:MGI Symbol;Acc:MGI:96434]
ENSMUSG00000035000	11.5952	1.0189	0.174565	5.8368	5.32133e-09	1.47772e-07	DPP4	dipeptidylpeptidase 4 [Source:MGI Symbol;Acc:MGI:94919]
ENSMUSG00000018293	6459.75	-0.293795	0.0503617	-5.83369	5.42145e-09	1.49921e-07	PFN1	profilin 1 [Source:MGI Symbol;Acc:MGI:97549]
ENSMUSG00000018340	969.425	-0.486457	0.0833863	-5.83377	5.41879e-09	1.49921e-07	ANXA6	annexin A6 [Source:MGI Symbol;Acc:MGI:88255]
ENSMUSG00000036218	27.2566	-1.11054	0.190367	-5.83367	5.42202e-09	1.49921e-07	PDZRN4	PDZ domain containing RING finger 4 [Source:MGI Symbol;Acc:MGI:3056996]
ENSMUSG00000068798	2100.64	0.335448	0.0575231	5.83154	5.49177e-09	1.51632e-07	RAP1A	RAS-related protein-1a [Source:MGI Symbol;Acc:MGI:97852]
ENSMUSG00000063488	79.0256	0.840831	0.144361	5.8245	5.72837e-09	1.57939e-07	ZKSCAN7	zinc finger with KRAB and SCAN domains 7 [Source:MGI Symbol;Acc:MGI:3040678]
ENSMUSG00000026755	1066.21	0.418329	0.0718425	5.82286	5.78496e-09	1.59272e-07	ARPC5L	actin related protein 2/3 complex, subunit 5-like [Source:MGI Symbol;Acc:MGI:1921442]
ENSMUSG00000054169	6.77094	0.944991	0.162306	5.82228	5.80517e-09	1.59601e-07	CEACAM10	carcinoembryonic antigen-related cell adhesion molecule 10 [Source:MGI Symbol;Acc:MGI:1347248]
ENSMUSG00000003435	1553.37	-0.344139	0.0591124	-5.82176	5.82296e-09	1.59862e-07	SUPT5	suppressor of Ty 5 [Source:MGI Symbol;Acc:MGI:1202400]
ENSMUSG00000030681	815.031	-0.481419	0.08271	-5.82056	5.86497e-09	1.60787e-07	MVP	major vault protein [Source:MGI Symbol;Acc:MGI:1925638]
ENSMUSG00000057278	276.268	0.787662	0.135359	5.81906	5.91803e-09	1.62011e-07	SNRPG	small nuclear ribonucleoprotein polypeptide G [Source:MGI Symbol;Acc:MGI:1915261]
ENSMUSG00000034889	415.248	-0.426024	0.0732982	-5.81221	6.16544e-09	1.68545e-07	CACTIN	cactin, spliceosome C complex subunit [Source:MGI Symbol;Acc:MGI:1917562]
ENSMUSG00000030801	411.728	0.442552	0.0761477	5.81176	6.18193e-09	1.68757e-07	KAT8	K(lysine) acetyltransferase 8 [Source:MGI Symbol;Acc:MGI:1915023]
ENSMUSG00000030329	8.07643	-1.09501	0.188476	-5.8098	6.25457e-09	1.70499e-07	PIANP	PILR alpha associated neural protein [Source:MGI Symbol;Acc:MGI:2441908]
ENSMUSG00000004814	65.4342	0.615953	0.106178	5.80111	6.58787e-09	1.79331e-07	CCL24	chemokine (C-C motif) ligand 24 [Source:MGI Symbol;Acc:MGI:1928953]
ENSMUSG00000073616	781.395	0.773293	0.133334	5.79969	6.64377e-09	1.80598e-07	COPS9	COP9 signalosome subunit 9 [Source:MGI Symbol;Acc:MGI:1914165]
ENSMUSG00000030281	7.45098	1.12653	0.194266	5.79887	6.67628e-09	1.81227e-07	IL17RC	interleukin 17 receptor C [Source:MGI Symbol;Acc:MGI:2159336]
ENSMUSG00000018196	392.333	0.345248	0.0595402	5.79857	6.6883e-09	1.81298e-07	GLRX2	glutaredoxin 2 (thioltransferase) [Source:MGI Symbol;Acc:MGI:1916617]
ENSMUSG00000063882	552.138	0.712032	0.122801	5.79828	6.69986e-09	1.81357e-07	UQCRH	ubiquinol-cytochrome c reductase hinge protein [Source:MGI Symbol;Acc:MGI:1913826]
ENSMUSG00000026385	520.209	0.537198	0.0927492	5.79194	6.95779e-09	1.88075e-07	DBI	diazepam binding inhibitor [Source:MGI Symbol;Acc:MGI:94865]
ENSMUSG00000027166	272.555	0.530001	0.0915693	5.78798	7.12376e-09	1.92292e-07	DNAJC24	DnaJ heat shock protein family (Hsp40) member C24 [Source:MGI Symbol;Acc:MGI:1919522]
ENSMUSG00000032788	454.989	-0.621789	0.107446	-5.78699	7.16583e-09	1.93157e-07	PDXK	pyridoxal (pyridoxine, vitamin B6) kinase [Source:MGI Symbol;Acc:MGI:1351869]
ENSMUSG00000022677	585.676	0.610293	0.105474	5.78617	7.20075e-09	1.93828e-07	FOPNL	Fgfr1op N-terminal like [Source:MGI Symbol;Acc:MGI:1913336]
ENSMUSG00000031827	1407.77	-1.1225	0.194077	-5.7838	7.30305e-09	1.96308e-07	COTL1	coactosin-like 1 (Dictyostelium) [Source:MGI Symbol;Acc:MGI:1919292]
ENSMUSG00000042289	915.932	0.359894	0.0622656	5.77998	7.47077e-09	2.00537e-07	HSD3B7	hydroxy-delta-5-steroid dehydrogenase, 3 beta- and steroid delta-isomerase 7 [Source:MGI Symbol;Acc:MGI:2141879]
ENSMUSG00000060288	105.243	0.80871	0.139981	5.77727	7.59227e-09	2.03515e-07	PPIH	peptidyl prolyl isomerase H [Source:MGI Symbol;Acc:MGI:106499]
ENSMUSG00000093979	355.251	0.641088	0.11099	5.7761	7.64541e-09	2.04655e-07	GM2237	predicted gene 2237 [Source:MGI Symbol;Acc:MGI:3780407]
ENSMUSG00000006920	1227.83	-0.397945	0.0688994	-5.77575	7.66124e-09	2.04795e-07	EZH1	enhancer of zeste 1 polycomb repressive complex 2 subunit [Source:MGI Symbol;Acc:MGI:1097695]
ENSMUSG00000022020	350.189	0.510983	0.0884886	5.77456	7.71541e-09	2.05958e-07	NAA16	N(alpha)-acetyltransferase 16, NatA auxiliary subunit [Source:MGI Symbol;Acc:MGI:1914147]
ENSMUSG00000066861	57.8444	-1.08917	0.188815	-5.76846	7.99984e-09	2.13256e-07	OAS1G	2'-5' oligoadenylate synthetase 1G [Source:MGI Symbol;Acc:MGI:97429]
ENSMUSG00000086841	146.964	0.789185	0.136836	5.76738	8.05146e-09	2.14335e-07	2410006H16RIK	RIKEN cDNA 2410006H16 gene [Source:MGI Symbol;Acc:MGI:1916471]
ENSMUSG00000015013	411.299	0.493127	0.0855266	5.76577	8.12852e-09	2.16089e-07	TRAPPC2L	trafficking protein particle complex 2-like [Source:MGI Symbol;Acc:MGI:1916295]
ENSMUSG00000020857	500.371	0.795511	0.138084	5.76108	8.35772e-09	2.21876e-07	NME2	NME/NM23 nucleoside diphosphate kinase 2 [Source:MGI Symbol;Acc:MGI:97356]
ENSMUSG00000030435	454.352	-0.632848	0.109876	-5.75967	8.42772e-09	2.23427e-07	U2AF2	U2 small nuclear ribonucleoprotein auxiliary factor (U2AF) 2 [Source:MGI Symbol;Acc:MGI:98886]
ENSMUSG00000066036	620.583	-0.501468	0.0871865	-5.75167	8.83678e-09	2.3395e-07	UBR4	ubiquitin protein ligase E3 component n-recognin 4 [Source:MGI Symbol;Acc:MGI:1916366]
ENSMUSG00000027399	1915.22	-0.415963	0.072413	-5.74431	9.22952e-09	2.4368e-07	IL1A	interleukin 1 alpha [Source:MGI Symbol;Acc:MGI:96542]
ENSMUSG00000030287	2672.81	-0.354463	0.0617434	-5.7409	9.41771e-09	2.48309e-07	ITPR2	inositol 1,4,5-triphosphate receptor 2 [Source:MGI Symbol;Acc:MGI:99418]
ENSMUSG00000025366	1096.24	-0.395037	0.068852	-5.73748	9.60945e-09	2.53018e-07	ESYT1	extended synaptotagmin-like protein 1 [Source:MGI Symbol;Acc:MGI:1344426]
ENSMUSG00000053600	341.649	0.530457	0.0924768	5.7361	9.688e-09	2.54739e-07	ZFP472	zinc finger protein 472 [Source:MGI Symbol;Acc:MGI:2385049]
ENSMUSG00000070527	42.1429	-1.02061	0.178124	-5.72981	1.00543e-08	2.64011e-07	MKRN3	makorin, ring finger protein, 3 [Source:MGI Symbol;Acc:MGI:2181178]
ENSMUSG00000050075	6.06296	0.993945	0.173537	5.72756	1.01887e-08	2.66814e-07	GPR171	G protein-coupled receptor 171 [Source:MGI Symbol;Acc:MGI:2442043]
ENSMUSG00000052688	56.1706	-1.02852	0.179571	-5.72762	1.01849e-08	2.66814e-07	RAB7B	RAB7B, member RAS oncogene family [Source:MGI Symbol;Acc:MGI:2442295]
ENSMUSG00000083649	73.7596	0.859923	0.150245	5.72345	1.04379e-08	2.72971e-07	RASL2-9	RAS-like, family 2, locus 9 [Source:MGI Symbol;Acc:MGI:104605]
ENSMUSG00000041859	970.792	-0.425498	0.0744138	-5.718	1.07784e-08	2.81492e-07	MCM3	minichromosome maintenance complex component 3 [Source:MGI Symbol;Acc:MGI:101845]
ENSMUSG00000028854	671.139	-0.505916	0.0885825	-5.71124	1.12156e-08	2.92516e-07	SLC9A1	solute carrier family 9 (sodium/hydrogen exchanger), member 1 [Source:MGI Symbol;Acc:MGI:102462]
ENSMUSG00000038604	306.087	-0.461777	0.0809167	-5.70682	1.15103e-08	2.99797e-07	FAM65A	family with sequence similarity 65, member A [Source:MGI Symbol;Acc:MGI:1922937]
ENSMUSG00000097048	399.493	0.650941	0.114093	5.70538	1.16084e-08	3.01945e-07	1600020E01RIK	RIKEN cDNA 1600020E01 gene [Source:MGI Symbol;Acc:MGI:1919262]
ENSMUSG00000030613	471.42	0.557138	0.0977436	5.7	1.1981e-08	3.11215e-07	CCDC90B	coiled-coil domain containing 90B [Source:MGI Symbol;Acc:MGI:1913615]
ENSMUSG00000020850	879.135	-0.665664	0.116809	-5.69876	1.20683e-08	3.13063e-07	PRPF8	pre-mRNA processing factor 8 [Source:MGI Symbol;Acc:MGI:2179381]
ENSMUSG00000099881	295.62	0.695404	0.12206	5.69725	1.21758e-08	3.15426e-07	2810013P06RIK	RIKEN cDNA 2810013P06 gene [Source:MGI Symbol;Acc:MGI:1914456]
ENSMUSG00000021577	3581.57	-0.418802	0.0735275	-5.69586	1.22753e-08	3.17579e-07	SDHA	succinate dehydrogenase complex, subunit A, flavoprotein (Fp) [Source:MGI Symbol;Acc:MGI:1914195]
ENSMUSG00000022892	2109.23	-0.463521	0.081383	-5.69555	1.22973e-08	3.17722e-07	APP	amyloid beta (A4) precursor protein [Source:MGI Symbol;Acc:MGI:88059]
ENSMUSG00000029126	11.1069	-1.10169	0.193445	-5.69511	1.23293e-08	3.17918e-07	NSG1	neuron specific gene family member 1 [Source:MGI Symbol;Acc:MGI:109149]
ENSMUSG00000029913	15.2268	1.0769	0.189096	5.69499	1.23379e-08	3.17918e-07	PRDM5	PR domain containing 5 [Source:MGI Symbol;Acc:MGI:1918029]
ENSMUSG00000056737	593.594	-0.603088	0.105938	-5.69283	1.24952e-08	3.21542e-07	CAPG	capping protein (actin filament), gelsolin-like [Source:MGI Symbol;Acc:MGI:1098259]
ENSMUSG00000037405	3504.73	-0.337814	0.0593963	-5.68746	1.28947e-08	3.31381e-07	ICAM1	intercellular adhesion molecule 1 [Source:MGI Symbol;Acc:MGI:96392]
ENSMUSG00000027835	1060.53	0.605696	0.106502	5.6872	1.29143e-08	3.31443e-07	PDCD10	programmed cell death 10 [Source:MGI Symbol;Acc:MGI:1928396]
ENSMUSG00000015291	5477.44	0.490293	0.0863274	5.67946	1.35118e-08	3.45977e-07	GDI1	guanosine diphosphate (GDP) dissociation inhibitor 1 [Source:MGI Symbol;Acc:MGI:99846]
ENSMUSG00000083380	325.163	0.808438	0.142345	5.6794	1.35164e-08	3.45977e-07	GM3244	predicted pseudogene 3244 [Source:MGI Symbol;Acc:MGI:3781422]
ENSMUSG00000003528	553.74	-0.40829	0.071905	-5.67818	1.36136e-08	3.48003e-07	SLC25A1	solute carrier family 25 (mitochondrial carrier, citrate transporter), member 1 [Source:MGI Symbol;Acc:MGI:1345283]
ENSMUSG00000062006	825.615	0.72311	0.127408	5.67554	1.38252e-08	3.52944e-07	RPL34	ribosomal protein L34 [Source:MGI Symbol;Acc:MGI:1915686]
ENSMUSG00000090942	20.8513	-1.10053	0.194047	-5.67146	1.41584e-08	3.60974e-07	F830016B08RIK	RIKEN cDNA F830016B08 gene [Source:MGI Symbol;Acc:MGI:3588218]
ENSMUSG00000049502	968.113	-0.553035	0.0975768	-5.66769	1.44738e-08	3.68528e-07	DTX3L	deltex 3-like, E3 ubiquitin ligase [Source:MGI Symbol;Acc:MGI:2656973]
ENSMUSG00000022575	2245.09	0.355652	0.0627926	5.6639	1.47968e-08	3.76255e-07	GSDMD	gasdermin D [Source:MGI Symbol;Acc:MGI:1916396]
ENSMUSG00000006782	1369.44	-0.418112	0.0738481	-5.66178	1.49809e-08	3.80436e-07	CNP	2',3'-cyclic nucleotide 3' phosphodiesterase [Source:MGI Symbol;Acc:MGI:88437]
ENSMUSG00000032381	750.805	0.648532	0.114569	5.66063	1.50817e-08	3.82492e-07	FAM96A	family with sequence similarity 96, member A [Source:MGI Symbol;Acc:MGI:1915500]
ENSMUSG00000017760	23703.8	-0.314343	0.0555358	-5.66019	1.51208e-08	3.82982e-07	CTSA	cathepsin A [Source:MGI Symbol;Acc:MGI:97748]
ENSMUSG00000064349	5.95001	1.05052	0.185608	5.65986	1.51499e-08	3.83216e-07	MT-TC	mitochondrially encoded tRNA cysteine [Source:MGI Symbol;Acc:MGI:102490]
ENSMUSG00000030162	30.1175	-1.05724	0.186922	-5.65606	1.54888e-08	3.91275e-07	OLR1	oxidized low density lipoprotein (lectin-like) receptor 1 [Source:MGI Symbol;Acc:MGI:1261434]
ENSMUSG00000064147	10.2584	0.956215	0.169077	5.6555	1.5539e-08	3.92029e-07	RAB44	RAB44, member RAS oncogene family [Source:MGI Symbol;Acc:MGI:3045302]
ENSMUSG00000096802	8.21575	-1.04141	0.184228	-5.65283	1.57825e-08	3.97653e-07	GM15433	predicted pseudogene 15433 [Source:MGI Symbol;Acc:MGI:3705860]
ENSMUSG00000074829	580.721	0.563634	0.0997482	5.65056	1.59922e-08	4.0241e-07	2010315B03RIK	RIKEN cDNA 2010315B03 gene [Source:MGI Symbol;Acc:MGI:1919321]
ENSMUSG00000103735	609.84	-0.445439	0.0789223	-5.64402	1.66126e-08	4.17477e-07	GM38317	predicted gene, 38317 [Source:MGI Symbol;Acc:MGI:5611545]
ENSMUSG00000025278	390.92	-0.791969	0.140343	-5.64311	1.67008e-08	4.1915e-07	FLNB	filamin, beta [Source:MGI Symbol;Acc:MGI:2446089]
ENSMUSG00000066306	2366.17	-0.504546	0.0894599	-5.63991	1.70135e-08	4.26443e-07	NUMA1	nuclear mitotic apparatus protein 1 [Source:MGI Symbol;Acc:MGI:2443665]
ENSMUSG00000026761	903.788	0.458522	0.081312	5.63904	1.71002e-08	4.28059e-07	ORC4	origin recognition complex, subunit 4 [Source:MGI Symbol;Acc:MGI:1347043]
ENSMUSG00000035325	1757.75	-0.433931	0.0769594	-5.63844	1.71593e-08	4.28984e-07	SEC31A	Sec31 homolog A (S. cerevisiae) [Source:MGI Symbol;Acc:MGI:1916412]
ENSMUSG00000021696	5.49852	0.982154	0.174197	5.63819	1.71848e-08	4.29063e-07	ELOVL7	ELOVL family member 7, elongation of long chain fatty acids (yeast) [Source:MGI Symbol;Acc:MGI:1921809]
ENSMUSG00000033900	12.2006	-1.08847	0.193147	-5.63546	1.74588e-08	4.35341e-07	MAP9	microtubule-associated protein 9 [Source:MGI Symbol;Acc:MGI:2442208]
ENSMUSG00000027274	298.339	0.58367	0.103629	5.63229	1.77834e-08	4.42865e-07	MKKS	McKusick-Kaufman syndrome [Source:MGI Symbol;Acc:MGI:1891836]
ENSMUSG00000030061	600.342	0.351424	0.062398	5.63197	1.78159e-08	4.43102e-07	UBA3	ubiquitin-like modifier activating enzyme 3 [Source:MGI Symbol;Acc:MGI:1341217]
ENSMUSG00000055044	4.60205	0.976656	0.17344	5.6311	1.79066e-08	4.44784e-07	PDLIM1	PDZ and LIM domain 1 (elfin) [Source:MGI Symbol;Acc:MGI:1860611]
ENSMUSG00000063849	4211.94	0.518702	0.0922228	5.62444	1.86108e-08	4.61681e-07	PPCDC	phosphopantothenoylcysteine decarboxylase [Source:MGI Symbol;Acc:MGI:1914062]
ENSMUSG00000020307	451.78	0.441961	0.0785986	5.62301	1.8766e-08	4.63827e-07	CDC34	cell division cycle 34 [Source:MGI Symbol;Acc:MGI:102657]
ENSMUSG00000022265	680.96	-0.537736	0.0956318	-5.62298	1.87694e-08	4.63827e-07	ANK	progressive ankylosis [Source:MGI Symbol;Acc:MGI:3045421]
ENSMUSG00000096218	146.537	0.75035	0.133438	5.62322	1.87435e-08	4.63827e-07	GM2916	predicted gene 2916 [Source:MGI Symbol;Acc:MGI:3781094]
ENSMUSG00000105004	53.2927	-0.918763	0.163413	-5.62232	1.88409e-08	4.64999e-07	GM43075	predicted gene 43075 [Source:MGI Symbol;Acc:MGI:5663212]
ENSMUSG00000025488	4.19225	0.904008	0.160859	5.61989	1.91082e-08	4.70994e-07	COX8B	cytochrome c oxidase subunit VIIIb [Source:MGI Symbol;Acc:MGI:105958]
ENSMUSG00000087178	96.3521	0.828982	0.147574	5.61739	1.93867e-08	4.77249e-07	A230056P14RIK	RIKEN cDNA A230056P14 gene [Source:MGI Symbol;Acc:MGI:2444856]
ENSMUSG00000017428	921.785	-0.353962	0.0630483	-5.61415	1.97533e-08	4.85654e-07	PSMD11	proteasome (prosome, macropain) 26S subunit, non-ATPase, 11 [Source:MGI Symbol;Acc:MGI:1916327]
ENSMUSG00000029605	34.4789	-0.905232	0.16125	-5.61386	1.97867e-08	4.85858e-07	OAS1B	2'-5' oligoadenylate synthetase 1B [Source:MGI Symbol;Acc:MGI:97430]
ENSMUSG00000058093	377.367	0.50444	0.0898802	5.61237	1.99578e-08	4.89436e-07	ZFP729B	zinc finger protein 729b [Source:MGI Symbol;Acc:MGI:2145180]
ENSMUSG00000005514	1313.3	-0.402545	0.0717387	-5.61126	2.00857e-08	4.91946e-07	POR	P450 (cytochrome) oxidoreductase [Source:MGI Symbol;Acc:MGI:97744]
ENSMUSG00000091803	470.463	0.548173	0.0977125	5.61006	2.02251e-08	4.94734e-07	COX16	cytochrome c oxidase assembly protein 16 [Source:MGI Symbol;Acc:MGI:1913522]
ENSMUSG00000034709	1129.98	0.28249	0.0503821	5.60696	2.05911e-08	5.0305e-07	PPP1R21	protein phosphatase 1, regulatory subunit 21 [Source:MGI Symbol;Acc:MGI:1921075]
ENSMUSG00000085337	98.6656	-0.710483	0.126785	-5.60385	2.09644e-08	5.1152e-07	GM15964	predicted gene 15964 [Source:MGI Symbol;Acc:MGI:3802003]
ENSMUSG00000048330	341.223	-0.644384	0.114996	-5.60353	2.1003e-08	5.11816e-07	RIC3	RIC3 acetylcholine receptor chaperone [Source:MGI Symbol;Acc:MGI:2443887]
ENSMUSG00000006576	26.4892	-1.08926	0.194527	-5.59954	2.1492e-08	5.23071e-07	SLC4A3	solute carrier family 4 (anion exchanger), member 3 [Source:MGI Symbol;Acc:MGI:109350]
ENSMUSG00000074227	13.8204	1.04623	0.186971	5.59568	2.19754e-08	5.34164e-07	SPINT2	serine protease inhibitor, Kunitz type 2 [Source:MGI Symbol;Acc:MGI:1338031]
ENSMUSG00000035202	3494.19	-0.445523	0.079668	-5.59224	2.24155e-08	5.44175e-07	LARS2	leucyl-tRNA synthetase, mitochondrial [Source:MGI Symbol;Acc:MGI:2142973]
ENSMUSG00000069516	14546.6	0.731663	0.130958	5.58702	2.31002e-08	5.60094e-07	LYZ2	lysozyme 2 [Source:MGI Symbol;Acc:MGI:96897]
ENSMUSG00000026628	289.907	-0.72182	0.129469	-5.57525	2.47176e-08	5.97806e-07	ATF3	activating transcription factor 3 [Source:MGI Symbol;Acc:MGI:109384]
ENSMUSG00000022346	675.739	-0.753737	0.1353	-5.57087	2.53476e-08	6.12277e-07	MYC	myelocytomatosis oncogene [Source:MGI Symbol;Acc:MGI:97250]
ENSMUSG00000089929	2129.25	0.563805	0.10123	5.56955	2.55401e-08	6.16155e-07	BCL2A1B	B cell leukemia/lymphoma 2 related protein A1b [Source:MGI Symbol;Acc:MGI:1278326]
ENSMUSG00000037683	116.424	0.661147	0.118758	5.56718	2.58901e-08	6.23818e-07	ARMC3	armadillo repeat containing 3 [Source:MGI Symbol;Acc:MGI:1918132]
ENSMUSG00000003458	5056.52	-0.318024	0.0571415	-5.56556	2.61318e-08	6.28074e-07	NCSTN	nicastrin [Source:MGI Symbol;Acc:MGI:1891700]
ENSMUSG00000037361	561.657	0.576192	0.103527	5.5656	2.6125e-08	6.28074e-07	SF3B6	splicing factor 3B, subunit 6 [Source:MGI Symbol;Acc:MGI:1913305]
ENSMUSG00000016194	12.6161	0.950699	0.170872	5.5638	2.63964e-08	6.33646e-07	HSD11B1	hydroxysteroid 11-beta dehydrogenase 1 [Source:MGI Symbol;Acc:MGI:103562]
ENSMUSG00000021967	343.579	0.660187	0.11869	5.56226	2.66301e-08	6.38294e-07	MRPL57	mitochondrial ribosomal protein L57 [Source:MGI Symbol;Acc:MGI:1915090]
ENSMUSG00000060475	992.478	0.372467	0.0669653	5.56209	2.66562e-08	6.38294e-07	WTAP	Wilms tumour 1-associating protein [Source:MGI Symbol;Acc:MGI:1926395]
ENSMUSG00000013974	46.521	1.03105	0.185385	5.56165	2.67236e-08	6.38324e-07	MCEMP1	mast cell expressed membrane protein 1 [Source:MGI Symbol;Acc:MGI:1916439]
ENSMUSG00000041645	1238.86	-0.307098	0.0552161	-5.56176	2.67067e-08	6.38324e-07	DDX24	DEAD (Asp-Glu-Ala-Asp) box polypeptide 24 [Source:MGI Symbol;Acc:MGI:1351337]
ENSMUSG00000026939	603.301	0.50418	0.0906807	5.55995	2.69858e-08	6.4379e-07	TMEM141	transmembrane protein 141 [Source:MGI Symbol;Acc:MGI:1098773]
ENSMUSG00000030120	1768.91	-0.288778	0.051969	-5.55674	2.74859e-08	6.54104e-07	MLF2	myeloid leukemia factor 2 [Source:MGI Symbol;Acc:MGI:1353554]
ENSMUSG00000049313	1147.41	-0.712759	0.128333	-5.55398	2.79237e-08	6.62887e-07	SORL1	sortilin-related receptor, LDLR class A repeats-containing [Source:MGI Symbol;Acc:MGI:1202296]
ENSMUSG00000078941	1186.9	0.42567	0.076641	5.55408	2.79075e-08	6.62887e-07	AK6	adenylate kinase 6 [Source:MGI Symbol;Acc:MGI:5510732]
ENSMUSG00000007564	2290.79	-0.386097	0.0695494	-5.5514	2.8339e-08	6.71921e-07	PPP2R1A	protein phosphatase 2, regulatory subunit A, alpha [Source:MGI Symbol;Acc:MGI:1926334]
ENSMUSG00000055184	174.105	0.493423	0.0889096	5.54971	2.86145e-08	6.7762e-07	FAM72A	family with sequence similarity 72, member A [Source:MGI Symbol;Acc:MGI:1919669]
ENSMUSG00000034120	3137.18	0.297979	0.053711	5.54782	2.89251e-08	6.84135e-07	SRSF2	serine/arginine-rich splicing factor 2 [Source:MGI Symbol;Acc:MGI:98284]
ENSMUSG00000059248	198.001	0.669655	0.120721	5.54711	2.90423e-08	6.85228e-07	2017-09-09	septin 9 [Source:MGI Symbol;Acc:MGI:1858222]
ENSMUSG00000092572	7.73273	0.859724	0.154981	5.54728	2.90142e-08	6.85228e-07	SERPINB10	serine (or cysteine) peptidase inhibitor, clade B (ovalbumin), member 10 [Source:MGI Symbol;Acc:MGI:2138648]
ENSMUSG00000023913	139.097	0.932328	0.168092	5.54653	2.9139e-08	6.86671e-07	PLA2G7	phospholipase A2, group VII (platelet-activating factor acetylhydrolase, plasma) [Source:MGI Symbol;Acc:MGI:1351327]
ENSMUSG00000033429	174.544	0.641891	0.115814	5.54243	2.98305e-08	7.02109e-07	MCEE	methylmalonyl CoA epimerase [Source:MGI Symbol;Acc:MGI:1920974]
ENSMUSG00000012483	141.675	0.789646	0.142527	5.54031	3.01934e-08	7.09785e-07	RPA3	replication protein A3 [Source:MGI Symbol;Acc:MGI:1915490]
ENSMUSG00000031990	415.133	-0.440027	0.0795034	-5.53469	3.11775e-08	7.32025e-07	JAM3	junction adhesion molecule 3 [Source:MGI Symbol;Acc:MGI:1933825]
ENSMUSG00000043017	7.9021	0.951045	0.171988	5.52971	3.20764e-08	7.52217e-07	PTGIR	prostaglandin I receptor (IP) [Source:MGI Symbol;Acc:MGI:99535]
ENSMUSG00000035983	25.8221	0.907798	0.16432	5.52459	3.30262e-08	7.7355e-07	GM7008	predicted gene 7008 [Source:MGI Symbol;Acc:MGI:3647211]
ENSMUSG00000021936	167.923	0.670971	0.121486	5.52305	3.33164e-08	7.78458e-07	MAPK8	mitogen-activated protein kinase 8 [Source:MGI Symbol;Acc:MGI:1346861]
ENSMUSG00000052997	1436.57	0.24786	0.0448769	5.52311	3.33042e-08	7.78458e-07	UBA2	ubiquitin-like modifier activating enzyme 2 [Source:MGI Symbol;Acc:MGI:1858313]
ENSMUSG00000078921	191.736	-0.885839	0.160568	-5.5169	3.45024e-08	8.05196e-07	TGTP2	T cell specific GTPase 2 [Source:MGI Symbol;Acc:MGI:3710083]
ENSMUSG00000044867	31.6127	-0.942148	0.170801	-5.51605	3.46705e-08	8.08141e-07	GIMAP1OS	GTPase, IMAP family member 1, opposite strand [Source:MGI Symbol;Acc:MGI:3781523]
ENSMUSG00000019761	29.989	-0.909447	0.164917	-5.51457	3.49629e-08	8.13972e-07	KRT10	keratin 10 [Source:MGI Symbol;Acc:MGI:96685]
ENSMUSG00000079260	462.21	-0.499282	0.0905704	-5.51263	3.53502e-08	8.21999e-07	TMPPE	transmembrane protein with metallophosphoesterase domain [Source:MGI Symbol;Acc:MGI:5317335]
ENSMUSG00000026914	835.793	0.444149	0.0806017	5.51043	3.57968e-08	8.30383e-07	PSMD14	proteasome (prosome, macropain) 26S subunit, non-ATPase, 14 [Source:MGI Symbol;Acc:MGI:1913284]
ENSMUSG00000063787	302.216	0.766335	0.139067	5.51053	3.57745e-08	8.30383e-07	CHCHD1	coiled-coil-helix-coiled-coil-helix domain containing 1 [Source:MGI Symbol;Acc:MGI:1913371]
ENSMUSG00000045107	568.317	0.522421	0.0948236	5.5094	3.60057e-08	8.34225e-07	SAYSD1	SAYSVFN motif domain containing 1 [Source:MGI Symbol;Acc:MGI:1914759]
ENSMUSG00000039232	25.3286	1.06267	0.192965	5.50708	3.64835e-08	8.44282e-07	STX11	syntaxin 11 [Source:MGI Symbol;Acc:MGI:1921982]
ENSMUSG00000072109	38.6806	-1.0347	0.187994	-5.50387	3.71552e-08	8.58796e-07	A530040E14RIK	RIKEN cDNA A530040E14 gene [Source:MGI Symbol;Acc:MGI:3612703]
ENSMUSG00000056429	3920.06	-0.415164	0.0754477	-5.50268	3.74068e-08	8.63579e-07	TGOLN1	trans-golgi network protein [Source:MGI Symbol;Acc:MGI:105080]
ENSMUSG00000032872	596.909	0.364756	0.0663128	5.50054	3.78626e-08	8.73057e-07	CYB5R4	cytochrome b5 reductase 4 [Source:MGI Symbol;Acc:MGI:2386848]
ENSMUSG00000021242	5412.58	-0.29514	0.0536733	-5.49881	3.82358e-08	8.80609e-07	NPC2	Niemann-Pick type C2 [Source:MGI Symbol;Acc:MGI:1915213]
ENSMUSG00000030088	28.4896	-1.02133	0.185828	-5.49612	3.88235e-08	8.93079e-07	ALDH1L1	aldehyde dehydrogenase 1 family, member L1 [Source:MGI Symbol;Acc:MGI:1340024]
ENSMUSG00000102703	33.9366	-0.917834	0.167197	-5.48954	4.02973e-08	9.2588e-07	GM38313	predicted gene, 38313 [Source:MGI Symbol;Acc:MGI:5611541]
ENSMUSG00000032089	12005.6	0.372649	0.0679567	5.48362	4.16713e-08	9.5454e-07	IL10RA	interleukin 10 receptor, alpha [Source:MGI Symbol;Acc:MGI:96538]
ENSMUSG00000046402	9.08403	0.935947	0.170683	5.48353	4.16931e-08	9.5454e-07	RBP1	retinol binding protein 1, cellular [Source:MGI Symbol;Acc:MGI:97876]
ENSMUSG00000025494	10.2695	1.05983	0.19334	5.4817	4.21258e-08	9.63303e-07	SIGIRR	single immunoglobulin and toll-interleukin 1 receptor (TIR) domain [Source:MGI Symbol;Acc:MGI:1344402]
ENSMUSG00000090069	69.8278	0.768985	0.140377	5.47801	4.30148e-08	9.82468e-07	E430024P14RIK	RIKEN cDNA E430024P14 gene [Source:MGI Symbol;Acc:MGI:2445079]
ENSMUSG00000015750	674.851	-0.562765	0.102759	-5.47657	4.3366e-08	9.89318e-07	APH1A	aph1 homolog A, gamma secretase subunit [Source:MGI Symbol;Acc:MGI:2385110]
ENSMUSG00000096606	2973.15	-0.354209	0.0646798	-5.47635	4.34193e-08	9.89366e-07	TPBGL	trophoblast glycoprotein-like [Source:MGI Symbol;Acc:MGI:3646425]
ENSMUSG00000021025	1735.61	0.558988	0.102104	5.4747	4.38257e-08	9.97449e-07	NFKBIA	nuclear factor of kappa light polypeptide gene enhancer in B cells inhibitor, alpha [Source:MGI Symbol;Acc:MGI:104741]
ENSMUSG00000041881	844.33	0.65462	0.119582	5.47423	4.3943e-08	9.97766e-07	NDUFA7	NADH dehydrogenase (ubiquinone) 1 alpha subcomplex, 7 (B14.5a) [Source:MGI Symbol;Acc:MGI:1913666]
ENSMUSG00000021807	802.329	0.415069	0.0758316	5.47357	4.41056e-08	1.00028e-06	2700060E02RIK	RIKEN cDNA 2700060E02 gene [Source:MGI Symbol;Acc:MGI:1915295]
ENSMUSG00000030744	2439.67	0.638756	0.116708	5.47313	4.4216e-08	1.00161e-06	RPS3	ribosomal protein S3 [Source:MGI Symbol;Acc:MGI:1350917]
ENSMUSG00000021187	14.0967	1.00273	0.183359	5.46866	4.53444e-08	1.02596e-06	TC2N	tandem C2 domains, nuclear [Source:MGI Symbol;Acc:MGI:1921663]
ENSMUSG00000024462	425.591	0.451611	0.0826367	5.46501	4.62873e-08	1.04607e-06	GABBR1	gamma-aminobutyric acid (GABA) B receptor, 1 [Source:MGI Symbol;Acc:MGI:1860139]
ENSMUSG00000021290	422.368	0.656101	0.120078	5.46397	4.65609e-08	1.05102e-06	2010107E04RIK	RIKEN cDNA 2010107E04 gene [Source:MGI Symbol;Acc:MGI:1917507]
ENSMUSG00000033186	547.086	0.471168	0.0863731	5.45503	4.89654e-08	1.10401e-06	MZT1	mitotic spindle organizing protein 1 [Source:MGI Symbol;Acc:MGI:1924039]
ENSMUSG00000039217	336.443	0.422086	0.077403	5.45309	4.9502e-08	1.11481e-06	IL18	interleukin 18 [Source:MGI Symbol;Acc:MGI:107936]
ENSMUSG00000041132	1099.17	0.459216	0.0842232	5.45237	4.9704e-08	1.11805e-06	N4BP2L1	NEDD4 binding protein 2-like 1 [Source:MGI Symbol;Acc:MGI:2140872]
ENSMUSG00000100691	81.0677	0.764048	0.140145	5.45185	4.98482e-08	1.11999e-06	2010320M18RIK	RIKEN cDNA 2010320M18 gene [Source:MGI Symbol;Acc:MGI:1919343]
ENSMUSG00000034192	312.237	0.554374	0.101725	5.44973	5.04452e-08	1.13209e-06	LSM3	LSM3 homolog, U6 small nuclear RNA and mRNA degradation associated [Source:MGI Symbol;Acc:MGI:1914928]
ENSMUSG00000045252	562.836	-0.480322	0.0881949	-5.44614	5.14755e-08	1.15386e-06	ZFP574	zinc finger protein 574 [Source:MGI Symbol;Acc:MGI:2442951]
ENSMUSG00000027018	343.48	0.334692	0.061474	5.44444	5.19681e-08	1.16355e-06	HAT1	histone aminotransferase 1 [Source:MGI Symbol;Acc:MGI:96013]
ENSMUSG00000030142	24.5962	0.832558	0.153049	5.4398	5.33404e-08	1.1929e-06	CLEC4E	C-type lectin domain family 4, member e [Source:MGI Symbol;Acc:MGI:1861232]
ENSMUSG00000039501	1949.83	-0.541863	0.099628	-5.43886	5.36224e-08	1.19782e-06	ZNFX1	zinc finger, NFX1-type containing 1 [Source:MGI Symbol;Acc:MGI:2138982]
ENSMUSG00000029632	863.27	0.54568	0.100376	5.43635	5.43842e-08	1.21343e-06	NDUFA4	NADH dehydrogenase (ubiquinone) 1 alpha subcomplex, 4 [Source:MGI Symbol;Acc:MGI:107686]
ENSMUSG00000058812	43.0317	0.719818	0.132588	5.42898	5.66775e-08	1.26314e-06	0610039K10RIK	RIKEN cDNA 0610039K10 gene [Source:MGI Symbol;Acc:MGI:1915636]
ENSMUSG00000021639	3422.09	0.363854	0.0670239	5.42872	5.67594e-08	1.2635e-06	GTF2H2	general transcription factor II H, polypeptide 2 [Source:MGI Symbol;Acc:MGI:1345669]
ENSMUSG00000097715	466.049	0.584706	0.107725	5.42777	5.70613e-08	1.26876e-06	GPR137B-PS	G protein-coupled receptor 137B, pseudogene [Source:MGI Symbol;Acc:MGI:3710533]
ENSMUSG00000022421	116.991	-0.697147	0.128455	-5.42717	5.72547e-08	1.2709e-06	NPTXR	neuronal pentraxin receptor [Source:MGI Symbol;Acc:MGI:1920590]
ENSMUSG00000085287	48.4456	0.929848	0.171335	5.42706	5.72895e-08	1.2709e-06	4833418N02RIK	RIKEN cDNA 4833418N02 gene [Source:MGI Symbol;Acc:MGI:1921847]
ENSMUSG00000021779	22.534	-1.05618	0.194731	-5.42379	5.83486e-08	1.29287e-06	THRB	thyroid hormone receptor beta [Source:MGI Symbol;Acc:MGI:98743]
ENSMUSG00000054455	479.728	0.523104	0.0964497	5.42359	5.84135e-08	1.29287e-06	VAPB	vesicle-associated membrane protein, associated protein B and C [Source:MGI Symbol;Acc:MGI:1928744]
ENSMUSG00000022463	359.802	-0.556455	0.102712	-5.41761	6.04009e-08	1.33532e-06	SREBF2	sterol regulatory element binding factor 2 [Source:MGI Symbol;Acc:MGI:107585]
ENSMUSG00000036636	1900.39	-0.37136	0.0685757	-5.41533	6.11757e-08	1.3509e-06	CLCN7	chloride channel, voltage-sensitive 7 [Source:MGI Symbol;Acc:MGI:1347048]
ENSMUSG00000029022	846.708	0.515639	0.0952545	5.41328	6.18807e-08	1.36348e-06	MIIP	migration and invasion inhibitory protein [Source:MGI Symbol;Acc:MGI:106506]
ENSMUSG00000042541	783.693	0.397857	0.0734967	5.41326	6.18864e-08	1.36348e-06	SEM1	SEM1, 26S proteasome complex subunit [Source:MGI Symbol;Acc:MGI:109238]
ENSMUSG00000031880	295.467	-0.468159	0.0864972	-5.41242	6.2178e-08	1.36834e-06	RRAD	Ras-related associated with diabetes [Source:MGI Symbol;Acc:MGI:1930943]
ENSMUSG00000037490	6.59349	0.938094	0.173338	5.41195	6.23438e-08	1.37043e-06	SLC2A12	solute carrier family 2 (facilitated glucose transporter), member 12 [Source:MGI Symbol;Acc:MGI:3052471]
ENSMUSG00000060904	2245.31	0.421723	0.0779286	5.41166	6.24443e-08	1.37108e-06	ARL1	ADP-ribosylation factor-like 1 [Source:MGI Symbol;Acc:MGI:99436]
ENSMUSG00000059278	331.733	0.66989	0.123847	5.40901	6.33747e-08	1.38992e-06	NAA38	N(alpha)-acetyltransferase 38, NatC auxiliary subunit [Source:MGI Symbol;Acc:MGI:1925554]
ENSMUSG00000029817	260.142	0.541924	0.100209	5.40791	6.37627e-08	1.39684e-06	TRA2A	transformer 2 alpha homolog (Drosophila) [Source:MGI Symbol;Acc:MGI:1933972]
ENSMUSG00000017721	282.305	-0.680025	0.125757	-5.40747	6.39205e-08	1.39871e-06	PIGT	phosphatidylinositol glycan anchor biosynthesis, class T [Source:MGI Symbol;Acc:MGI:1926178]
ENSMUSG00000021365	79.8552	0.940068	0.173854	5.40722	6.40111e-08	1.39911e-06	NEDD9	neural precursor cell expressed, developmentally down-regulated gene 9 [Source:MGI Symbol;Acc:MGI:97302]
ENSMUSG00000017221	1549.3	-0.260994	0.0482733	-5.40659	6.42352e-08	1.40242e-06	PSMD3	proteasome (prosome, macropain) 26S subunit, non-ATPase, 3 [Source:MGI Symbol;Acc:MGI:98858]
ENSMUSG00000024818	4886.94	0.201724	0.0373146	5.40604	6.44352e-08	1.4052e-06	SLC25A45	solute carrier family 25, member 45 [Source:MGI Symbol;Acc:MGI:2147731]
ENSMUSG00000026171	274.861	0.418669	0.0774553	5.4053	6.47001e-08	1.40938e-06	RNF25	ring finger protein 25 [Source:MGI Symbol;Acc:MGI:1890215]
ENSMUSG00000018974	653.402	-0.416613	0.0771012	-5.40346	6.53681e-08	1.42072e-06	SART3	squamous cell carcinoma antigen recognized by T cells 3 [Source:MGI Symbol;Acc:MGI:1858230]
ENSMUSG00000020910	266.292	0.479193	0.0886805	5.40359	6.53199e-08	1.42072e-06	ADPRM	ADP-ribose/CDP-alcohol diphosphatase, manganese dependent [Source:MGI Symbol;Acc:MGI:1913608]
ENSMUSG00000002679	257.648	0.507703	0.0939959	5.40133	6.61468e-08	1.43603e-06	MED6	mediator complex subunit 6 [Source:MGI Symbol;Acc:MGI:1917042]
ENSMUSG00000018819	1310.98	-0.534374	0.0990153	-5.39688	6.78096e-08	1.47048e-06	LSP1	lymphocyte specific 1 [Source:MGI Symbol;Acc:MGI:96832]
ENSMUSG00000094258	49.312	0.960556	0.178013	5.396	6.81432e-08	1.47605e-06	GM8159	predicted gene 8159 [Source:MGI Symbol;Acc:MGI:3647882]
ENSMUSG00000055061	49.2489	0.990138	0.18356	5.39409	6.88711e-08	1.49015e-06	4931431C16RIK	RIKEN cDNA 4931431C16 gene [Source:MGI Symbol;Acc:MGI:1921614]
ENSMUSG00000009292	1256.24	-0.466904	0.08657	-5.39337	6.91492e-08	1.49449e-06	TRPM2	transient receptor potential cation channel, subfamily M, member 2 [Source:MGI Symbol;Acc:MGI:1351901]
ENSMUSG00000024268	39.3366	-0.870158	0.161364	-5.39253	6.94728e-08	1.49863e-06	CELF4	CUGBP, Elav-like family member 4 [Source:MGI Symbol;Acc:MGI:1932407]
ENSMUSG00000051319	200.417	0.5767	0.106945	5.39247	6.94961e-08	1.49863e-06	1500011K16RIK	RIKEN cDNA 1500011K16 gene [Source:MGI Symbol;Acc:MGI:1915135]
ENSMUSG00000022617	1175.2	0.4636	0.0860332	5.38861	7.10046e-08	1.52775e-06	CHKB	choline kinase beta [Source:MGI Symbol;Acc:MGI:1328313]
ENSMUSG00000017144	9.6695	1.00012	0.18561	5.38829	7.11293e-08	1.52872e-06	RND3	Rho family GTPase 3 [Source:MGI Symbol;Acc:MGI:1921444]
ENSMUSG00000027346	1084.67	0.429795	0.0797846	5.38695	7.16644e-08	1.53851e-06	GPCPD1	glycerophosphocholine phosphodiesterase 1 [Source:MGI Symbol;Acc:MGI:104898]
ENSMUSG00000074129	1302.61	0.649449	0.120587	5.38571	7.21592e-08	1.54741e-06	RPL13A	ribosomal protein L13A [Source:MGI Symbol;Acc:MGI:1351455]
ENSMUSG00000031608	539.176	-0.379868	0.0705536	-5.3841	7.28073e-08	1.55958e-06	GALNT7	UDP-N-acetyl-alpha-D-galactosamine: polypeptide N-acetylgalactosaminyltransferase 7 [Source:MGI Symbol;Acc:MGI:1349449]
ENSMUSG00000064372	6.37482	0.998285	0.185482	5.38213	7.36103e-08	1.57493e-06	MT-TP	mitochondrially encoded tRNA proline [Source:MGI Symbol;Acc:MGI:102478]
ENSMUSG00000080058	163.107	0.666392	0.12382	5.38194	7.36873e-08	1.57493e-06	GM11175	predicted gene 11175 [Source:MGI Symbol;Acc:MGI:3809055]
ENSMUSG00000034330	3783.22	-0.411624	0.0764944	-5.38109	7.40343e-08	1.5806e-06	PLCG2	phospholipase C, gamma 2 [Source:MGI Symbol;Acc:MGI:97616]
ENSMUSG00000025982	8128.16	0.368618	0.0685289	5.37901	7.48955e-08	1.59722e-06	SF3B1	splicing factor 3b, subunit 1 [Source:MGI Symbol;Acc:MGI:1932339]
ENSMUSG00000030979	466.612	0.528769	0.0983573	5.376	7.61604e-08	1.6224e-06	UROS	uroporphyrinogen III synthase [Source:MGI Symbol;Acc:MGI:98917]
ENSMUSG00000074813	45.3213	0.935241	0.173977	5.37565	7.6306e-08	1.62371e-06	GM14005	predicted gene 14005 [Source:MGI Symbol;Acc:MGI:3652191]
ENSMUSG00000069713	25.343	0.959842	0.178584	5.37473	7.66971e-08	1.63023e-06	4933406P04RIK	RIKEN cDNA 4933406P04 gene [Source:MGI Symbol;Acc:MGI:1921670]
ENSMUSG00000103898	62.8629	-0.849512	0.158076	-5.37409	7.69697e-08	1.63423e-06	GM30238	predicted gene, 30238 [Source:MGI Symbol;Acc:MGI:5589397]
ENSMUSG00000039168	381.616	-0.399143	0.0743059	-5.37162	7.80307e-08	1.65494e-06	DAP	death-associated protein [Source:MGI Symbol;Acc:MGI:1918190]
ENSMUSG00000036733	1267.3	-0.351275	0.0654042	-5.37084	7.83702e-08	1.66031e-06	RBM42	RNA binding motif protein 42 [Source:MGI Symbol;Acc:MGI:1915285]
ENSMUSG00000056145	21.7653	-1.01411	0.188948	-5.36713	7.99985e-08	1.6911e-06	AI504432	expressed sequence AI504432 [Source:MGI Symbol;Acc:MGI:2139742]
ENSMUSG00000091625	150.715	0.6503	0.121163	5.36716	7.99881e-08	1.6911e-06	LSM5	LSM5 homolog, U6 small nuclear RNA and mRNA degradation associated [Source:MGI Symbol;Acc:MGI:1913623]
ENSMUSG00000046364	588.248	0.447318	0.0833644	5.36581	8.05857e-08	1.70165e-06	RPL27A	ribosomal protein L27A [Source:MGI Symbol;Acc:MGI:1347076]
ENSMUSG00000022295	3020.67	-0.250705	0.0467385	-5.364	8.14006e-08	1.71697e-06	ATP6V1C1	ATPase, H+ transporting, lysosomal V1 subunit C1 [Source:MGI Symbol;Acc:MGI:1913585]
ENSMUSG00000064246	58.729	1.03863	0.193734	5.36113	8.27052e-08	1.74259e-06	CHIL1	chitinase-like 1 [Source:MGI Symbol;Acc:MGI:1340899]
ENSMUSG00000061613	498.425	0.367706	0.0686311	5.35771	8.4283e-08	1.7739e-06	U2AF1	U2 small nuclear ribonucleoprotein auxiliary factor (U2AF) 1 [Source:MGI Symbol;Acc:MGI:98884]
ENSMUSG00000042644	222.125	-0.781647	0.145999	-5.3538	8.61282e-08	1.80879e-06	ITPR3	inositol 1,4,5-triphosphate receptor 3 [Source:MGI Symbol;Acc:MGI:96624]
ENSMUSG00000035311	453.857	-0.421776	0.0790032	-5.33872	9.36051e-08	1.96367e-06	GNPTAB	N-acetylglucosamine-1-phosphate transferase, alpha and beta subunits [Source:MGI Symbol;Acc:MGI:3643902]
ENSMUSG00000026568	583.421	0.488033	0.0914431	5.33701	9.44913e-08	1.98011e-06	MPC2	mitochondrial pyruvate carrier 2 [Source:MGI Symbol;Acc:MGI:1917706]
ENSMUSG00000070044	226.153	-0.563703	0.105627	-5.33672	9.46448e-08	1.98118e-06	FAM149A	family with sequence similarity 149, member A [Source:MGI Symbol;Acc:MGI:2387177]
ENSMUSG00000027217	1182.34	-0.453147	0.0849254	-5.33582	9.51134e-08	1.98883e-06	TSPAN18	tetraspanin 18 [Source:MGI Symbol;Acc:MGI:1917186]
ENSMUSG00000024853	2086.41	-0.340766	0.0638853	-5.33402	9.60611e-08	2.0043e-06	SF3B2	splicing factor 3b, subunit 2 [Source:MGI Symbol;Acc:MGI:2441856]
ENSMUSG00000043940	2526.07	-0.430723	0.0807473	-5.33421	9.59622e-08	2.0043e-06	WDFY3	WD repeat and FYVE domain containing 3 [Source:MGI Symbol;Acc:MGI:1096875]
ENSMUSG00000029163	47.3354	1.0042	0.188276	5.33369	9.62376e-08	2.00582e-06	EMILIN1	elastin microfibril interfacer 1 [Source:MGI Symbol;Acc:MGI:1926189]
ENSMUSG00000028164	1314.03	-0.267066	0.0500953	-5.33114	9.7596e-08	2.03193e-06	MANBA	mannosidase, beta A, lysosomal [Source:MGI Symbol;Acc:MGI:88175]
ENSMUSG00000028034	1527.09	-0.29533	0.0554107	-5.32983	9.83021e-08	2.04443e-06	FUBP1	far upstream element (FUSE) binding protein 1 [Source:MGI Symbol;Acc:MGI:1196294]
ENSMUSG00000024807	1490.33	-0.334874	0.0628549	-5.32774	9.94445e-08	2.06596e-06	SYVN1	synovial apoptosis inhibitor 1, synoviolin [Source:MGI Symbol;Acc:MGI:1921376]
ENSMUSG00000063884	533.292	0.346295	0.0650381	5.32449	1.01234e-07	2.10089e-06	PTCD3	pentatricopeptide repeat domain 3 [Source:MGI Symbol;Acc:MGI:1917206]
ENSMUSG00000016494	5437.65	-0.404435	0.0759958	-5.32181	1.02738e-07	2.12751e-06	CD34	CD34 antigen [Source:MGI Symbol;Acc:MGI:88329]
ENSMUSG00000084957	430.359	0.503828	0.0947035	5.32006	1.03733e-07	2.14582e-06	BBIP1	BBSome interacting protein 1 [Source:MGI Symbol;Acc:MGI:1913610]
ENSMUSG00000038416	886.912	0.308093	0.0579562	5.31597	1.06093e-07	2.19229e-06	CDC16	CDC16 cell division cycle 16 [Source:MGI Symbol;Acc:MGI:1917207]
ENSMUSG00000022667	450.658	0.434376	0.0817192	5.31547	1.0638e-07	2.19586e-06	CD200R1	CD200 receptor 1 [Source:MGI Symbol;Acc:MGI:1889024]
ENSMUSG00000068758	21.0798	-0.966427	0.181846	-5.31455	1.06923e-07	2.20472e-06	IL3RA	interleukin 3 receptor, alpha chain [Source:MGI Symbol;Acc:MGI:96553]
ENSMUSG00000023020	513.578	0.52238	0.0982984	5.31423	1.07111e-07	2.20623e-06	COX14	cytochrome c oxidase assembly protein 14 [Source:MGI Symbol;Acc:MGI:1913629]
ENSMUSG00000041096	532.635	0.481612	0.090646	5.31311	1.07772e-07	2.21692e-06	TSPYL2	TSPY-like 2 [Source:MGI Symbol;Acc:MGI:106244]
ENSMUSG00000051748	75.0467	0.836717	0.157486	5.31296	1.0786e-07	2.21692e-06	WFDC21	WAP four-disulfide core domain 21 [Source:MGI Symbol;Acc:MGI:1913357]
ENSMUSG00000003134	865.463	-0.423172	0.079672	-5.31143	1.08768e-07	2.23321e-06	TBC1D8	TBC1 domain family, member 8 [Source:MGI Symbol;Acc:MGI:1927225]
ENSMUSG00000056121	2617.62	-0.33758	0.0635814	-5.30941	1.09981e-07	2.25572e-06	FEZ2	fasciculation and elongation protein zeta 2 (zygin II) [Source:MGI Symbol;Acc:MGI:2675856]
ENSMUSG00000025701	1109.24	-0.396793	0.0747418	-5.30885	1.10317e-07	2.2594e-06	ALOX5	arachidonate 5-lipoxygenase [Source:MGI Symbol;Acc:MGI:87999]
ENSMUSG00000035585	1014.63	-0.266604	0.05022	-5.30873	1.10394e-07	2.2594e-06	TSEN34	tRNA splicing endonuclease subunit 34 [Source:MGI Symbol;Acc:MGI:1913328]
ENSMUSG00000011158	995.764	0.383591	0.0723253	5.3037	1.13479e-07	2.32006e-06	BRF1	BRF1, RNA polymerase III transcription initiation factor 90 kDa subunit [Source:MGI Symbol;Acc:MGI:1919558]
ENSMUSG00000021905	288.038	0.562443	0.106094	5.30136	1.14945e-07	2.34756e-06	DPH3	diphthamine biosynthesis 3 [Source:MGI Symbol;Acc:MGI:1922658]
ENSMUSG00000022817	41875.1	-0.355849	0.0671273	-5.30111	1.15102e-07	2.34828e-06	ITGB5	integrin beta 5 [Source:MGI Symbol;Acc:MGI:96614]
ENSMUSG00000018774	14026.5	-0.400819	0.0756279	-5.29988	1.15881e-07	2.36168e-06	CD68	CD68 antigen [Source:MGI Symbol;Acc:MGI:88342]
ENSMUSG00000039795	242.116	0.450419	0.0850234	5.29759	1.17344e-07	2.38896e-06	ZFAND1	zinc finger, AN1-type domain 1 [Source:MGI Symbol;Acc:MGI:1913611]
ENSMUSG00000011958	1731.67	0.321696	0.0607298	5.29717	1.17614e-07	2.39194e-06	BNIP2	BCL2/adenovirus E1B interacting protein 2 [Source:MGI Symbol;Acc:MGI:109327]
ENSMUSG00000062328	565.72	0.745093	0.140775	5.29277	1.20475e-07	2.44754e-06	RPL17	ribosomal protein L17 [Source:MGI Symbol;Acc:MGI:2448270]
ENSMUSG00000050621	134.801	0.762202	0.144102	5.28931	1.2278e-07	2.49175e-06	RPS27RT	ribosomal protein S27, retrogene [Source:MGI Symbol;Acc:MGI:3704345]
ENSMUSG00000022610	24.2984	-0.953342	0.180266	-5.28852	1.23311e-07	2.49989e-06	MAPK12	mitogen-activated protein kinase 12 [Source:MGI Symbol;Acc:MGI:1353438]
ENSMUSG00000044145	57.2544	0.822002	0.155645	5.28128	1.28286e-07	2.59802e-06	1810024B03RIK	RIKEN cDNA 1810024B03 gene [Source:MGI Symbol;Acc:MGI:1925560]
ENSMUSG00000095028	23.2944	0.984963	0.186531	5.28042	1.2889e-07	2.60752e-06	SIRPB1B	signal-regulatory protein beta 1B [Source:MGI Symbol;Acc:MGI:3779828]
ENSMUSG00000079396	41.1082	0.735575	0.139318	5.27983	1.29302e-07	2.61313e-06	GM3411	predicted gene 3411 [Source:MGI Symbol;Acc:MGI:3781589]
ENSMUSG00000000562	1793.65	-0.310722	0.0589067	-5.27481	1.32891e-07	2.68004e-06	ADORA3	adenosine A3 receptor [Source:MGI Symbol;Acc:MGI:104847]
ENSMUSG00000036941	596.52	0.436978	0.0828575	5.27385	1.33588e-07	2.69129e-06	ELAC1	elaC ribonuclease Z 1 [Source:MGI Symbol;Acc:MGI:1890495]
ENSMUSG00000000078	2192.38	-0.368217	0.0698285	-5.27316	1.34096e-07	2.6987e-06	KLF6	Kruppel-like factor 6 [Source:MGI Symbol;Acc:MGI:1346318]
ENSMUSG00000036564	63.809	-0.991131	0.188041	-5.27083	1.35812e-07	2.72977e-06	NDRG4	N-myc downstream regulated gene 4 [Source:MGI Symbol;Acc:MGI:2384590]
ENSMUSG00000085591	147.522	0.83151	0.157761	5.27068	1.35922e-07	2.72977e-06	GM13479	predicted gene 13479 [Source:MGI Symbol;Acc:MGI:3651869]
ENSMUSG00000026170	1238.87	0.410045	0.0778088	5.2699	1.36499e-07	2.73849e-06	CYP27A1	cytochrome P450, family 27, subfamily a, polypeptide 1 [Source:MGI Symbol;Acc:MGI:88594]
ENSMUSG00000021692	240.071	0.617749	0.117235	5.26932	1.36932e-07	2.74432e-06	DIMT1	DIM1 dimethyladenosine transferase 1-like (S. cerevisiae) [Source:MGI Symbol;Acc:MGI:1913504]
ENSMUSG00000056201	6672.83	-0.381014	0.0723625	-5.26536	1.39918e-07	2.80126e-06	CFL1	cofilin 1, non-muscle [Source:MGI Symbol;Acc:MGI:101757]
ENSMUSG00000025402	327.556	-0.47231	0.0897475	-5.26265	1.41995e-07	2.83991e-06	NAB2	Ngfi-A binding protein 2 [Source:MGI Symbol;Acc:MGI:107563]
ENSMUSG00000004665	436.765	0.595638	0.113214	5.26119	1.43124e-07	2.85952e-06	CNN2	calponin 2 [Source:MGI Symbol;Acc:MGI:105093]
ENSMUSG00000068882	1210.63	0.275213	0.0523136	5.26084	1.43402e-07	2.8621e-06	SSB	Sjogren syndrome antigen B [Source:MGI Symbol;Acc:MGI:98423]
ENSMUSG00000039001	308.125	0.69628	0.132392	5.25924	1.44654e-07	2.88411e-06	RPS21	ribosomal protein S21 [Source:MGI Symbol;Acc:MGI:1913731]
ENSMUSG00000018899	1273.72	-0.368665	0.0701272	-5.25709	1.46352e-07	2.91496e-06	IRF1	interferon regulatory factor 1 [Source:MGI Symbol;Acc:MGI:96590]
ENSMUSG00000024404	883.988	0.272898	0.0519175	5.25637	1.46927e-07	2.92338e-06	RIOK3	RIO kinase 3 [Source:MGI Symbol;Acc:MGI:1914128]
ENSMUSG00000031021	1946.63	-0.325627	0.0619604	-5.2554	1.47702e-07	2.93579e-06	TMEM9B	TMEM9 domain family, member B [Source:MGI Symbol;Acc:MGI:1915254]
ENSMUSG00000023143	2571.4	-0.363683	0.0692996	-5.24799	1.5377e-07	3.05011e-06	NAGPA	N-acetylglucosamine-1-phosphodiester alpha-N-acetylglucosaminidase [Source:MGI Symbol;Acc:MGI:1351598]
ENSMUSG00000035681	12.1953	1.00083	0.1907	5.24817	1.53615e-07	3.05011e-06	KCNC2	potassium voltage gated channel, Shaw-related subfamily, member 2 [Source:MGI Symbol;Acc:MGI:96668]
ENSMUSG00000040479	2542.89	-0.277036	0.0528054	-5.24637	1.55129e-07	3.0739e-06	DGKZ	diacylglycerol kinase zeta [Source:MGI Symbol;Acc:MGI:1278339]
ENSMUSG00000052949	270.758	-0.637822	0.121742	-5.23912	1.61346e-07	3.19383e-06	RNF157	ring finger protein 157 [Source:MGI Symbol;Acc:MGI:2442484]
ENSMUSG00000026632	211.293	0.670268	0.127953	5.23839	1.61987e-07	3.20322e-06	TATDN3	TatD DNase domain containing 3 [Source:MGI Symbol;Acc:MGI:1916222]
ENSMUSG00000017677	6099.65	0.351233	0.0670985	5.23458	1.65361e-07	3.26326e-06	WSB1	WD repeat and SOCS box-containing 1 [Source:MGI Symbol;Acc:MGI:1926139]
ENSMUSG00000026581	76.2834	0.767982	0.146711	5.23467	1.65276e-07	3.26326e-06	SELL	selectin, lymphocyte [Source:MGI Symbol;Acc:MGI:98279]
ENSMUSG00000073491	72.6113	-0.879691	0.168175	-5.23081	1.68767e-07	3.32367e-06	IFI213	interferon activated gene 213 [Source:MGI Symbol;Acc:MGI:3695276]
ENSMUSG00000032067	900.747	0.565557	0.10814	5.22986	1.69635e-07	3.33737e-06	PTS	6-pyruvoyl-tetrahydropterin synthase [Source:MGI Symbol;Acc:MGI:1338783]
ENSMUSG00000057506	315.553	0.561037	0.107309	5.22826	1.71114e-07	3.36303e-06	BLOC1S2	biogenesis of lysosomal organelles complex-1, subunit 2 [Source:MGI Symbol;Acc:MGI:1920939]
ENSMUSG00000030187	29.8677	1.01335	0.193882	5.22665	1.72605e-07	3.38889e-06	KLRA2	killer cell lectin-like receptor, subfamily A, member 2 [Source:MGI Symbol;Acc:MGI:101906]
ENSMUSG00000028048	2435.71	-0.252264	0.0483175	-5.22098	1.77983e-07	3.49093e-06	GBA	glucosidase, beta, acid [Source:MGI Symbol;Acc:MGI:95665]
ENSMUSG00000027678	1627.77	-0.419341	0.0803234	-5.22066	1.78288e-07	3.49336e-06	NCOA3	nuclear receptor coactivator 3 [Source:MGI Symbol;Acc:MGI:1276535]
ENSMUSG00000027667	535.167	0.483288	0.0926617	5.21561	1.8321e-07	3.58616e-06	ZFP639	zinc finger protein 639 [Source:MGI Symbol;Acc:MGI:1915028]
ENSMUSG00000085156	97.0022	0.731788	0.140326	5.21492	1.83894e-07	3.59589e-06	SNHG15	small nucleolar RNA host gene 15 [Source:MGI Symbol;Acc:MGI:3650059]
ENSMUSG00000009535	535.972	0.357949	0.0686501	5.21411	1.84705e-07	3.60811e-06	RNMT	RNA (guanine-7-) methyltransferase [Source:MGI Symbol;Acc:MGI:1915147]
ENSMUSG00000026201	629.321	0.515788	0.0989378	5.21326	1.85553e-07	3.62101e-06	STK16	serine/threonine kinase 16 [Source:MGI Symbol;Acc:MGI:1313271]
ENSMUSG00000023010	5358.07	-0.433997	0.0832728	-5.21175	1.87071e-07	3.64694e-06	TMBIM6	transmembrane BAX inhibitor motif containing 6 [Source:MGI Symbol;Acc:MGI:99682]
ENSMUSG00000061244	1130.76	0.279887	0.0537189	5.21022	1.88619e-07	3.67341e-06	EXOC5	exocyst complex component 5 [Source:MGI Symbol;Acc:MGI:2145645]
ENSMUSG00000025138	2290.69	0.364799	0.0700217	5.2098	1.89044e-07	3.67798e-06	SIRT7	sirtuin 7 [Source:MGI Symbol;Acc:MGI:2385849]
ENSMUSG00000073650	94.5796	0.717572	0.137787	5.20783	1.91064e-07	3.71354e-06	CATIP	ciliogenesis associated TTC17 interacting protein [Source:MGI Symbol;Acc:MGI:2685062]
ENSMUSG00000039478	116.561	0.719125	0.138163	5.20489	1.94113e-07	3.769e-06	MICU3	mitochondrial calcium uptake family, member 3 [Source:MGI Symbol;Acc:MGI:1925756]
ENSMUSG00000030057	6800.75	0.349643	0.0671938	5.2035	1.95572e-07	3.7935e-06	CNBP	cellular nucleic acid binding protein [Source:MGI Symbol;Acc:MGI:88431]
ENSMUSG00000039480	339.893	0.418516	0.0804601	5.20153	1.97653e-07	3.82674e-06	NT5DC1	5'-nucleotidase domain containing 1 [Source:MGI Symbol;Acc:MGI:2442446]
ENSMUSG00000024516	3133.69	0.461722	0.0887839	5.20051	1.98738e-07	3.84333e-06	SEC11C	SEC11 homolog C, signal peptidase complex subunit [Source:MGI Symbol;Acc:MGI:1913536]
ENSMUSG00000036896	81301.9	-0.254517	0.0489838	-5.19595	2.03677e-07	3.9349e-06	C1QC	complement component 1, q subcomponent, C chain [Source:MGI Symbol;Acc:MGI:88225]
ENSMUSG00000106254	53.9797	0.87716	0.169058	5.18851	2.11978e-07	4.09117e-06	GM42907	predicted gene 42907 [Source:MGI Symbol;Acc:MGI:5663044]
ENSMUSG00000071632	242.221	0.459501	0.0885929	5.18666	2.14097e-07	4.12794e-06	2510002D24RIK	RIKEN cDNA 2510002D24 gene [Source:MGI Symbol;Acc:MGI:1919557]
ENSMUSG00000041654	727.358	-0.374004	0.0722369	-5.17746	2.24925e-07	4.33239e-06	SLC39A11	solute carrier family 39 (metal ion transporter), member 11 [Source:MGI Symbol;Acc:MGI:1917056]
ENSMUSG00000032786	1548.64	-0.293019	0.0566192	-5.17527	2.27582e-07	4.37919e-06	ALAS1	aminolevulinic acid synthase 1 [Source:MGI Symbol;Acc:MGI:87989]
ENSMUSG00000039713	227.608	0.437144	0.0845254	5.17175	2.31908e-07	4.45799e-06	PLEKHG5	pleckstrin homology domain containing, family G (with RhoGef domain) member 5 [Source:MGI Symbol;Acc:MGI:2652860]
ENSMUSG00000069874	1844.07	-0.384343	0.0743294	-5.1708	2.33089e-07	4.47623e-06	IRGM2	immunity-related GTPase family M member 2 [Source:MGI Symbol;Acc:MGI:1926262]
ENSMUSG00000025330	29.0947	0.839271	0.162363	5.16911	2.3521e-07	4.51241e-06	PADI4	peptidyl arginine deiminase, type IV [Source:MGI Symbol;Acc:MGI:1338898]
ENSMUSG00000007603	728.273	0.327408	0.0634158	5.16289	2.4317e-07	4.65594e-06	DUS3L	dihydrouridine synthase 3-like (S. cerevisiae) [Source:MGI Symbol;Acc:MGI:2147092]
ENSMUSG00000028412	773.125	-0.359649	0.0697285	-5.15785	2.49797e-07	4.77809e-06	SLC44A1	solute carrier family 44, member 1 [Source:MGI Symbol;Acc:MGI:2140592]
ENSMUSG00000024030	1099.29	-0.420009	0.081453	-5.15646	2.51659e-07	4.80737e-06	ABCG1	ATP-binding cassette, sub-family G (WHITE), member 1 [Source:MGI Symbol;Acc:MGI:107704]
ENSMUSG00000025868	1106.16	0.357031	0.0692788	5.15354	2.55613e-07	4.87002e-06	HIGD2A	HIG1 domain family, member 2A [Source:MGI Symbol;Acc:MGI:1914294]
ENSMUSG00000056367	13.8876	-0.973584	0.188909	-5.15371	2.55381e-07	4.87002e-06	ACTR3B	ARP3 actin-related protein 3B [Source:MGI Symbol;Acc:MGI:2661120]
ENSMUSG00000036534	909.194	-0.641581	0.124503	-5.15315	2.56146e-07	4.87537e-06	SLC38A7	solute carrier family 38, member 7 [Source:MGI Symbol;Acc:MGI:2679005]
ENSMUSG00000029705	1568.55	-0.346984	0.0673535	-5.15168	2.58158e-07	4.90882e-06	CUX1	cut-like homeobox 1 [Source:MGI Symbol;Acc:MGI:88568]
ENSMUSG00000001249	198.199	-0.596263	0.115767	-5.15055	2.59728e-07	4.9338e-06	HPN	hepsin [Source:MGI Symbol;Acc:MGI:1196620]
ENSMUSG00000029538	2485.74	-0.27295	0.0530211	-5.14795	2.63355e-07	4.99779e-06	SRSF9	serine/arginine-rich splicing factor 9 [Source:MGI Symbol;Acc:MGI:104896]
ENSMUSG00000043336	851.181	0.498627	0.0968824	5.14672	2.65079e-07	5.02556e-06	FILIP1L	filamin A interacting protein 1-like [Source:MGI Symbol;Acc:MGI:1925999]
ENSMUSG00000029580	19217.9	-0.557055	0.10826	-5.14555	2.66741e-07	5.05212e-06	ACTB	actin, beta [Source:MGI Symbol;Acc:MGI:87904]
ENSMUSG00000027282	921.165	0.34589	0.0672266	5.14514	2.67319e-07	5.05809e-06	MTCH2	mitochondrial carrier 2 [Source:MGI Symbol;Acc:MGI:1929260]
ENSMUSG00000053317	462.397	0.506191	0.0984902	5.13951	2.75455e-07	5.20694e-06	SEC61B	Sec61 beta subunit [Source:MGI Symbol;Acc:MGI:1913462]
ENSMUSG00000055148	205.8	0.847433	0.16492	5.13845	2.77007e-07	5.23116e-06	KLF2	Kruppel-like factor 2 (lung) [Source:MGI Symbol;Acc:MGI:1342772]
ENSMUSG00000022674	665.698	0.431626	0.0840051	5.13809	2.77547e-07	5.23622e-06	UBE2V2	ubiquitin-conjugating enzyme E2 variant 2 [Source:MGI Symbol;Acc:MGI:1917870]
ENSMUSG00000027384	62.8572	0.77216	0.15033	5.13644	2.79994e-07	5.27722e-06	NDUFAF5	NADH dehydrogenase (ubiquinone) complex I, assembly factor 5 [Source:MGI Symbol;Acc:MGI:1916737]
ENSMUSG00000059540	250.266	0.569362	0.110859	5.13589	2.80808e-07	5.2843e-06	TCEA2	transcription elongation factor A (SII), 2 [Source:MGI Symbol;Acc:MGI:107368]
ENSMUSG00000091649	320.584	-0.565542	0.110117	-5.13582	2.80917e-07	5.2843e-06	PHF11B	PHD finger protein 11B [Source:MGI Symbol;Acc:MGI:3645789]
ENSMUSG00000020496	2062.87	-0.251379	0.0489577	-5.13462	2.82717e-07	5.31299e-06	RNF187	ring finger protein 187 [Source:MGI Symbol;Acc:MGI:1914224]
ENSMUSG00000003949	166.9	-0.79485	0.154897	-5.13149	2.87461e-07	5.39688e-06	HLF	hepatic leukemia factor [Source:MGI Symbol;Acc:MGI:96108]
ENSMUSG00000002416	437.075	0.590312	0.115084	5.1294	2.90662e-07	5.44122e-06	NDUFB2	NADH dehydrogenase (ubiquinone) 1 beta subcomplex, 2 [Source:MGI Symbol;Acc:MGI:1915448]
ENSMUSG00000019823	589.197	-0.469663	0.0915586	-5.12964	2.90296e-07	5.44122e-06	MICAL1	microtubule associated monooxygenase, calponin and LIM domain containing 1 [Source:MGI Symbol;Acc:MGI:2385847]
ENSMUSG00000059810	392.853	-0.446002	0.0869502	-5.1294	2.90669e-07	5.44122e-06	RGS3	regulator of G-protein signaling 3 [Source:MGI Symbol;Acc:MGI:1354734]
ENSMUSG00000037649	3037.69	-0.404265	0.07883	-5.12831	2.92353e-07	5.46745e-06	H2-DMA	histocompatibility 2, class II, locus DMa [Source:MGI Symbol;Acc:MGI:95921]
ENSMUSG00000085175	109.94	0.764041	0.149075	5.1252	2.9722e-07	5.55309e-06	GM11423	predicted gene 11423 [Source:MGI Symbol;Acc:MGI:3651335]
ENSMUSG00000039206	10968.7	-0.289748	0.0565643	-5.12246	3.01577e-07	5.62905e-06	DAGLB	diacylglycerol lipase, beta [Source:MGI Symbol;Acc:MGI:2442032]
ENSMUSG00000034353	575.32	0.681899	0.133255	5.11726	3.10005e-07	5.78077e-06	RAMP1	receptor (calcitonin) activity modifying protein 1 [Source:MGI Symbol;Acc:MGI:1858418]
ENSMUSG00000002052	379.347	-0.446116	0.0872059	-5.11566	3.12647e-07	5.81878e-06	SUPT6	suppressor of Ty 6 [Source:MGI Symbol;Acc:MGI:107726]
ENSMUSG00000030595	430.402	-0.34628	0.0677189	-5.1135	3.16245e-07	5.87443e-06	NFKBIB	nuclear factor of kappa light polypeptide gene enhancer in B cells inhibitor, beta [Source:MGI Symbol;Acc:MGI:104752]
ENSMUSG00000105345	16.801	-0.995709	0.194717	-5.11361	3.16063e-07	5.87443e-06	BC030343	cDNA sequence BC030343 [Source:MGI Symbol;Acc:MGI:2679267]
ENSMUSG00000028076	456.716	0.471358	0.0921853	5.11315	3.16823e-07	5.8795e-06	CD1D1	CD1d1 antigen [Source:MGI Symbol;Acc:MGI:107674]
ENSMUSG00000039670	122.501	0.71488	0.139895	5.1101	3.21984e-07	5.96954e-06	OXLD1	oxidoreductase like domain containing 1 [Source:MGI Symbol;Acc:MGI:1913681]
ENSMUSG00000021281	551.428	-0.605458	0.118502	-5.10927	3.23399e-07	5.99001e-06	TNFAIP2	tumor necrosis factor, alpha-induced protein 2 [Source:MGI Symbol;Acc:MGI:104960]
ENSMUSG00000075602	125.956	-0.726243	0.14216	-5.10863	3.24498e-07	6.00462e-06	LY6A	lymphocyte antigen 6 complex, locus A [Source:MGI Symbol;Acc:MGI:107527]
ENSMUSG00000040112	261.964	0.413511	0.080984	5.10608	3.28912e-07	6.08046e-06	MRPS35	mitochondrial ribosomal protein S35 [Source:MGI Symbol;Acc:MGI:2385255]
ENSMUSG00000027439	300.03	0.465844	0.0912505	5.10511	3.30606e-07	6.1001e-06	GZF1	GDNF-inducible zinc finger protein 1 [Source:MGI Symbol;Acc:MGI:1921783]
ENSMUSG00000031939	184.684	0.519622	0.101782	5.10527	3.30325e-07	6.1001e-06	TAF1D	TATA-box binding protein associated factor, RNA polymerase I, D [Source:MGI Symbol;Acc:MGI:1922566]
ENSMUSG00000062524	5.60261	0.731481	0.143307	5.10431	3.32002e-07	6.11415e-06	NCR1	natural cytotoxicity triggering receptor 1 [Source:MGI Symbol;Acc:MGI:1336212]
ENSMUSG00000041740	1030.37	-0.366261	0.071798	-5.10126	3.37392e-07	6.20751e-06	RNF10	ring finger protein 10 [Source:MGI Symbol;Acc:MGI:1859162]
ENSMUSG00000059479	44.771	-0.761487	0.149353	-5.09857	3.42235e-07	6.29061e-06	B3GNT8	UDP-GlcNAc:betaGal beta-1,3-N-acetylglucosaminyltransferase 8 [Source:MGI Symbol;Acc:MGI:2385269]
ENSMUSG00000040147	5.10232	0.865415	0.169751	5.09815	3.42992e-07	6.29831e-06	MAOB	monoamine oxidase B [Source:MGI Symbol;Acc:MGI:96916]
ENSMUSG00000045996	321.657	0.624669	0.122545	5.09745	3.44255e-07	6.3097e-06	POLR2K	polymerase (RNA) II (DNA directed) polypeptide K [Source:MGI Symbol;Acc:MGI:102725]
ENSMUSG00000089796	85.2244	0.802493	0.157477	5.09595	3.46996e-07	6.35392e-06	GM16575	predicted gene 16575 [Source:MGI Symbol;Acc:MGI:4414995]
ENSMUSG00000023861	2409.82	0.526583	0.103371	5.09409	3.50417e-07	6.41047e-06	MPC1	mitochondrial pyruvate carrier 1 [Source:MGI Symbol;Acc:MGI:1915240]
ENSMUSG00000036390	20.5549	0.929798	0.182538	5.09373	3.51091e-07	6.41671e-06	GADD45A	growth arrest and DNA-damage-inducible 45 alpha [Source:MGI Symbol;Acc:MGI:107799]
ENSMUSG00000054452	1085	-0.342818	0.06734	-5.09085	3.56462e-07	6.50872e-06	AES	amino-terminal enhancer of split [Source:MGI Symbol;Acc:MGI:95806]
ENSMUSG00000039512	576.67	-0.566449	0.11132	-5.08849	3.60927e-07	6.58402e-06	UHRF1BP1	UHRF1 (ICBP90) binding protein 1 [Source:MGI Symbol;Acc:MGI:3041238]
ENSMUSG00000000581	756.905	0.448881	0.0883059	5.08325	3.71027e-07	6.76186e-06	C1D	C1D nuclear receptor co-repressor [Source:MGI Symbol;Acc:MGI:1927354]
ENSMUSG00000058624	19.0997	0.810224	0.159443	5.08159	3.74295e-07	6.815e-06	GDA	guanine deaminase [Source:MGI Symbol;Acc:MGI:95678]
ENSMUSG00000091472	209.201	0.603203	0.118712	5.08125	3.74958e-07	6.82063e-06	GM3739	predicted gene 3739 [Source:MGI Symbol;Acc:MGI:3781914]
ENSMUSG00000055912	136.107	-0.515168	0.101405	-5.0803	3.76833e-07	6.84829e-06	TMEM150A	transmembrane protein 150A [Source:MGI Symbol;Acc:MGI:2385244]
ENSMUSG00000034708	34170.6	-0.40218	0.0791899	-5.07867	3.80076e-07	6.90073e-06	GRN	granulin [Source:MGI Symbol;Acc:MGI:95832]
ENSMUSG00000030718	271.09	-0.408848	0.0805166	-5.07781	3.81803e-07	6.92556e-06	PPME1	protein phosphatase methylesterase 1 [Source:MGI Symbol;Acc:MGI:1919840]
ENSMUSG00000035352	1060.56	-0.630638	0.12424	-5.07597	3.85532e-07	6.98195e-06	CCL12	chemokine (C-C motif) ligand 12 [Source:MGI Symbol;Acc:MGI:108224]
ENSMUSG00000098332	197.112	0.451139	0.0888784	5.07592	3.85635e-07	6.98195e-06	2310009A05RIK	RIKEN cDNA 2310009A05 gene [Source:MGI Symbol;Acc:MGI:1913614]
ENSMUSG00000092074	56.4049	0.872114	0.171849	5.07489	3.87713e-07	7.01299e-06	DYNLT1A	dynein light chain Tctex-type 1A [Source:MGI Symbol;Acc:MGI:3807506]
ENSMUSG00000056076	1640.13	-0.304358	0.0599762	-5.07465	3.88207e-07	7.01536e-06	EIF3B	eukaryotic translation initiation factor 3, subunit B [Source:MGI Symbol;Acc:MGI:106478]
ENSMUSG00000104960	54.1854	0.744671	0.146822	5.07192	3.93815e-07	7.11003e-06	SNHG8	small nucleolar RNA host gene 8 [Source:MGI Symbol;Acc:MGI:1917145]
ENSMUSG00000036850	356.904	0.642892	0.12691	5.06574	4.06819e-07	7.33794e-06	MRPL41	mitochondrial ribosomal protein L41 [Source:MGI Symbol;Acc:MGI:1333816]
ENSMUSG00000018921	217.212	-0.554803	0.109537	-5.065	4.08393e-07	7.35946e-06	PELP1	proline, glutamic acid and leucine rich protein 1 [Source:MGI Symbol;Acc:MGI:1922523]
ENSMUSG00000026600	1828.67	-0.285912	0.0564795	-5.06222	4.144e-07	7.46075e-06	SOAT1	sterol O-acyltransferase 1 [Source:MGI Symbol;Acc:MGI:104665]
ENSMUSG00000039672	8.90529	0.782048	0.154498	5.06188	4.15144e-07	7.46717e-06	KCNE2	potassium voltage-gated channel, Isk-related subfamily, gene 2 [Source:MGI Symbol;Acc:MGI:1891123]
ENSMUSG00000019710	703.746	0.430063	0.0850571	5.05617	4.27767e-07	7.68706e-06	MRPL24	mitochondrial ribosomal protein L24 [Source:MGI Symbol;Acc:MGI:1914957]
ENSMUSG00000004040	2962.64	-0.368968	0.072999	-5.05442	4.31698e-07	7.75049e-06	STAT3	signal transducer and activator of transcription 3 [Source:MGI Symbol;Acc:MGI:103038]
ENSMUSG00000033216	645.16	-0.366814	0.0725759	-5.05421	4.32165e-07	7.75166e-06	EEFSEC	eukaryotic elongation factor, selenocysteine-tRNA-specific [Source:MGI Symbol;Acc:MGI:2137092]
ENSMUSG00000040272	832.046	0.311449	0.0616771	5.04966	4.42592e-07	7.93131e-06	ACCS	1-aminocyclopropane-1-carboxylate synthase (non-functional) [Source:MGI Symbol;Acc:MGI:1919717]
ENSMUSG00000000355	517.085	0.375608	0.0744067	5.04804	4.46365e-07	7.9841e-06	MCTS1	malignant T cell amplified sequence 1 [Source:MGI Symbol;Acc:MGI:1916245]
ENSMUSG00000058704	465.234	0.425159	0.0842218	5.04808	4.46263e-07	7.9841e-06	MEMO1	mediator of cell motility 1 [Source:MGI Symbol;Acc:MGI:1924140]
ENSMUSG00000090691	93.0167	0.643279	0.127447	5.04744	4.47773e-07	8.00186e-06	GM3667	predicted gene 3667 [Source:MGI Symbol;Acc:MGI:3781843]
ENSMUSG00000021109	2599.09	-0.429234	0.0850639	-5.04602	4.51097e-07	8.05381e-06	HIF1A	hypoxia inducible factor 1, alpha subunit [Source:MGI Symbol;Acc:MGI:106918]
ENSMUSG00000015652	4.19424	0.722778	0.143254	5.04543	4.52491e-07	8.07124e-06	STEAP1	six transmembrane epithelial antigen of the prostate 1 [Source:MGI Symbol;Acc:MGI:1917608]
ENSMUSG00000021024	1481.11	0.589681	0.116965	5.04152	4.61847e-07	8.23051e-06	PSMA6	proteasome (prosome, macropain) subunit, alpha type 6 [Source:MGI Symbol;Acc:MGI:1347006]
ENSMUSG00000049037	54.7988	0.846216	0.167867	5.04099	4.63132e-07	8.24579e-06	CLEC4A1	C-type lectin domain family 4, member a1 [Source:MGI Symbol;Acc:MGI:3036291]
ENSMUSG00000020359	401.659	0.50855	0.100898	5.04022	4.65e-07	8.27143e-06	PHYKPL	5-phosphohydroxy-L-lysine phospholyase [Source:MGI Symbol;Acc:MGI:1920197]
ENSMUSG00000053291	1042.89	0.309942	0.0615035	5.03942	4.6694e-07	8.29829e-06	RAB4B	RAB4B, member RAS oncogene family [Source:MGI Symbol;Acc:MGI:105071]
ENSMUSG00000043795	24.6757	-0.918393	0.182279	-5.03839	4.69455e-07	8.33531e-06	PRR33	proline rich 33 [Source:MGI Symbol;Acc:MGI:3642289]
ENSMUSG00000073386	6.61409	0.750768	0.149097	5.03545	4.76732e-07	8.45673e-06	9830107B12RIK	RIKEN cDNA 9830107B12 gene [Source:MGI Symbol;Acc:MGI:3608415]
ENSMUSG00000027030	15.9498	0.934902	0.185708	5.03425	4.79726e-07	8.50203e-06	STK39	serine/threonine kinase 39 [Source:MGI Symbol;Acc:MGI:1858416]
ENSMUSG00000049421	1048.41	0.357342	0.0710109	5.03221	4.84848e-07	8.58492e-06	ZFP260	zinc finger protein 260 [Source:MGI Symbol;Acc:MGI:1347071]
ENSMUSG00000019849	495.94	-0.396864	0.0788702	-5.03186	4.85749e-07	8.58512e-06	PREP	prolyl endopeptidase [Source:MGI Symbol;Acc:MGI:1270863]
ENSMUSG00000049744	205.513	-0.74901	0.148849	-5.03201	4.85358e-07	8.58512e-06	ARHGAP15	Rho GTPase activating protein 15 [Source:MGI Symbol;Acc:MGI:1923367]
ENSMUSG00000048484	3.00091	0.806643	0.160315	5.03163	4.86332e-07	8.58756e-06	GM7461	predicted gene 7461 [Source:MGI Symbol;Acc:MGI:3645338]
ENSMUSG00000021241	570.583	0.527225	0.104831	5.02931	4.92256e-07	8.68422e-06	ISCA2	iron-sulfur cluster assembly 2 [Source:MGI Symbol;Acc:MGI:1921566]
ENSMUSG00000004846	3248.31	-0.315633	0.0627726	-5.0282	4.95104e-07	8.72649e-06	PLOD3	procollagen-lysine, 2-oxoglutarate 5-dioxygenase 3 [Source:MGI Symbol;Acc:MGI:1347008]
ENSMUSG00000079658	1006.05	0.360196	0.071667	5.02596	5.00917e-07	8.8209e-06	ELOC	elongin C [Source:MGI Symbol;Acc:MGI:1915173]
ENSMUSG00000026928	367.221	0.512219	0.10192	5.02572	5.01545e-07	8.8239e-06	CARD9	caspase recruitment domain family, member 9 [Source:MGI Symbol;Acc:MGI:2685628]
ENSMUSG00000050931	6.80057	0.781503	0.155522	5.02505	5.03306e-07	8.84682e-06	SGMS2	sphingomyelin synthase 2 [Source:MGI Symbol;Acc:MGI:1921692]
ENSMUSG00000035692	90.2093	-0.67838	0.135045	-5.02338	5.07703e-07	8.90789e-06	ISG15	ISG15 ubiquitin-like modifier [Source:MGI Symbol;Acc:MGI:1855694]
ENSMUSG00000040667	1550.8	0.379372	0.0755191	5.02353	5.07306e-07	8.90789e-06	NUP88	nucleoporin 88 [Source:MGI Symbol;Acc:MGI:104900]
ENSMUSG00000032475	835.891	0.373064	0.0742881	5.02185	5.11764e-07	8.97097e-06	NCK1	non-catalytic region of tyrosine kinase adaptor protein 1 [Source:MGI Symbol;Acc:MGI:109601]
ENSMUSG00000032966	1514.08	-0.26276	0.0523273	-5.02148	5.12753e-07	8.97201e-06	FKBP1A	FK506 binding protein 1a [Source:MGI Symbol;Acc:MGI:95541]
ENSMUSG00000038274	1009.86	0.558072	0.111135	5.02156	5.12544e-07	8.97201e-06	FAU	Finkel-Biskis-Reilly murine sarcoma virus (FBR-MuSV) ubiquitously expressed (fox derived) [Source:MGI Symbol;Acc:MGI:102547]
ENSMUSG00000027655	242.397	0.477318	0.0950659	5.02092	5.14243e-07	8.98994e-06	DHX35	DEAH (Asp-Glu-Ala-His) box polypeptide 35 [Source:MGI Symbol;Acc:MGI:1918965]
ENSMUSG00000022960	467.339	-0.350393	0.069793	-5.02047	5.15462e-07	9.0031e-06	DONSON	downstream neighbor of SON [Source:MGI Symbol;Acc:MGI:1890621]
ENSMUSG00000020460	970.686	0.581405	0.115882	5.01723	5.24216e-07	9.13944e-06	RPS27A	ribosomal protein S27A [Source:MGI Symbol;Acc:MGI:1925544]
ENSMUSG00000026825	22.6709	-0.973171	0.193963	-5.01729	5.24062e-07	9.13944e-06	DNM1	dynamin 1 [Source:MGI Symbol;Acc:MGI:107384]
ENSMUSG00000020253	754.579	0.339927	0.0678085	5.01305	5.35734e-07	9.33183e-06	PPM1M	protein phosphatase 1M [Source:MGI Symbol;Acc:MGI:1915155]
ENSMUSG00000074211	256.487	0.482132	0.0961801	5.01281	5.3642e-07	9.33535e-06	SDHAF1	succinate dehydrogenase complex assembly factor 1 [Source:MGI Symbol;Acc:MGI:1915582]
ENSMUSG00000018168	4.01506	0.762484	0.152171	5.01069	5.42343e-07	9.42992e-06	IKZF3	IKAROS family zinc finger 3 [Source:MGI Symbol;Acc:MGI:1342542]
ENSMUSG00000022199	1063.68	0.404316	0.0807113	5.00941	5.45982e-07	9.48466e-06	SLC22A17	solute carrier family 22 (organic cation transporter), member 17 [Source:MGI Symbol;Acc:MGI:1926225]
ENSMUSG00000025917	656.304	0.415528	0.0830015	5.00627	5.5496e-07	9.63195e-06	COPS5	COP9 signalosome subunit 5 [Source:MGI Symbol;Acc:MGI:1349415]
ENSMUSG00000022453	1842.6	-0.371028	0.0741466	-5.00398	5.616e-07	9.73843e-06	NAGA	N-acetyl galactosaminidase, alpha [Source:MGI Symbol;Acc:MGI:1261422]
ENSMUSG00000046691	292.376	-0.725131	0.144919	-5.00368	5.62452e-07	9.74446e-06	CHTF8	CTF8, chromosome transmission fidelity factor 8 [Source:MGI Symbol;Acc:MGI:2443370]
ENSMUSG00000026031	2259.1	0.320017	0.0639647	5.00302	5.6438e-07	9.76909e-06	CFLAR	CASP8 and FADD-like apoptosis regulator [Source:MGI Symbol;Acc:MGI:1336166]
ENSMUSG00000033161	1071.97	-0.766319	0.153211	-5.00173	5.68179e-07	9.82603e-06	ATP1A1	ATPase, Na+/K+ transporting, alpha 1 polypeptide [Source:MGI Symbol;Acc:MGI:88105]
ENSMUSG00000029599	686.668	-0.374385	0.0749031	-4.99825	5.78529e-07	9.99607e-06	DDX54	DEAD (Asp-Glu-Ala-Asp) box polypeptide 54 [Source:MGI Symbol;Acc:MGI:1919240]
ENSMUSG00000070544	755.487	0.44291	0.0886576	4.99574	5.86115e-07	1.01181e-05	TOP1	topoisomerase (DNA) I [Source:MGI Symbol;Acc:MGI:98788]
ENSMUSG00000041120	127.468	-0.628172	0.125816	-4.99276	5.95219e-07	1.02661e-05	NBL1	neuroblastoma, suppression of tumorigenicity 1 [Source:MGI Symbol;Acc:MGI:104591]
ENSMUSG00000033379	8494.46	0.496569	0.0994774	4.99178	5.98261e-07	1.03093e-05	ATP6V0B	ATPase, H+ transporting, lysosomal V0 subunit B [Source:MGI Symbol;Acc:MGI:1890510]
ENSMUSG00000026707	256.055	0.509697	0.10214	4.99018	6.03229e-07	1.03856e-05	NSUN6	NOL1/NOP2/Sun domain family member 6 [Source:MGI Symbol;Acc:MGI:1921705]
ENSMUSG00000062691	997.818	0.655696	0.131421	4.98929	6.06027e-07	1.04245e-05	CEBPZOS	CCAAT/enhancer binding protein (C/EBP), zeta, opposite strand [Source:MGI Symbol;Acc:MGI:1915804]
ENSMUSG00000045594	1408.17	-0.394909	0.0791673	-4.98828	6.09197e-07	1.04618e-05	GLB1	galactosidase, beta 1 [Source:MGI Symbol;Acc:MGI:88151]
ENSMUSG00000055302	3389.79	-0.296864	0.0595126	-4.98825	6.09278e-07	1.04618e-05	MRFAP1	Morf4 family associated protein 1 [Source:MGI Symbol;Acc:MGI:1914818]
ENSMUSG00000028597	11.4228	-0.970547	0.194643	-4.9863	6.15468e-07	1.05587e-05	GPX7	glutathione peroxidase 7 [Source:MGI Symbol;Acc:MGI:1914555]
ENSMUSG00000022124	1329.92	0.346815	0.06956	4.98584	6.16919e-07	1.05742e-05	FBXL3	F-box and leucine-rich repeat protein 3 [Source:MGI Symbol;Acc:MGI:1354702]
ENSMUSG00000023175	6428.14	-0.240055	0.0481508	-4.98547	6.18109e-07	1.05852e-05	BSG	basigin [Source:MGI Symbol;Acc:MGI:88208]
ENSMUSG00000022534	7.25135	0.768162	0.154147	4.98332	6.25028e-07	1.06942e-05	MEFV	Mediterranean fever [Source:MGI Symbol;Acc:MGI:1859396]
ENSMUSG00000062169	861.403	0.444911	0.0893003	4.98219	6.28684e-07	1.07472e-05	CNIH4	cornichon family AMPA receptor auxiliary protein 4 [Source:MGI Symbol;Acc:MGI:1925828]
ENSMUSG00000023467	14.0952	0.925607	0.18582	4.98119	6.31932e-07	1.07867e-05	TULP2	tubby-like protein 2 [Source:MGI Symbol;Acc:MGI:1861600]
ENSMUSG00000025491	4.94794	0.776076	0.155803	4.98114	6.3211e-07	1.07867e-05	IFITM1	interferon induced transmembrane protein 1 [Source:MGI Symbol;Acc:MGI:1915963]
ENSMUSG00000069793	92.1535	-0.619334	0.124357	-4.9803	6.34853e-07	1.08239e-05	SLFN9	schlafen 9 [Source:MGI Symbol;Acc:MGI:2445121]
ENSMUSG00000069305	7.58588	0.858508	0.172416	4.97927	6.38238e-07	1.0872e-05	HIST1H4N	histone cluster 1, H4n [Source:MGI Symbol;Acc:MGI:4843992]
ENSMUSG00000020477	326.822	0.544045	0.109279	4.97849	6.4081e-07	1.08966e-05	MRPS24	mitochondrial ribosomal protein S24 [Source:MGI Symbol;Acc:MGI:1928142]
ENSMUSG00000037236	1939.44	0.243914	0.048993	4.97855	6.40614e-07	1.08966e-05	MATR3	matrin 3 [Source:MGI Symbol;Acc:MGI:1298379]
ENSMUSG00000041959	102.619	0.754733	0.151604	4.9783	6.41445e-07	1.08978e-05	S100A10	S100 calcium binding protein A10 (calpactin) [Source:MGI Symbol;Acc:MGI:1339468]
ENSMUSG00000046909	269.462	0.550344	0.110635	4.9744	6.54488e-07	1.10998e-05	TEFM	transcription elongation factor, mitochondrial [Source:MGI Symbol;Acc:MGI:1915800]
ENSMUSG00000058290	554.938	-0.395095	0.0795112	-4.96904	6.72839e-07	1.1401e-05	ESPL1	extra spindle pole bodies 1, separase [Source:MGI Symbol;Acc:MGI:2146156]
ENSMUSG00000020328	260.644	0.415588	0.0836456	4.96843	6.74968e-07	1.14271e-05	NUDCD2	NudC domain containing 2 [Source:MGI Symbol;Acc:MGI:1277103]
ENSMUSG00000090523	3.45382	0.855211	0.172256	4.96475	6.87881e-07	1.16355e-05	GYPC	glycophorin C [Source:MGI Symbol;Acc:MGI:1098566]
ENSMUSG00000048550	173.532	0.550492	0.110889	4.96434	6.89354e-07	1.16502e-05	THNSL1	threonine synthase-like 1 (bacterial) [Source:MGI Symbol;Acc:MGI:2139347]
ENSMUSG00000030611	259.372	0.41419	0.0834415	4.96384	6.91137e-07	1.16701e-05	MRPS11	mitochondrial ribosomal protein S11 [Source:MGI Symbol;Acc:MGI:1915244]
ENSMUSG00000054435	5.0857	0.743481	0.149807	4.96293	6.94371e-07	1.17145e-05	GIMAP4	GTPase, IMAP family member 4 [Source:MGI Symbol;Acc:MGI:1349656]
ENSMUSG00000001082	815.307	-0.339728	0.0685029	-4.95932	7.07411e-07	1.1924e-05	MFSD10	major facilitator superfamily domain containing 10 [Source:MGI Symbol;Acc:MGI:1915544]
ENSMUSG00000029843	7.59588	0.918935	0.185375	4.95717	7.15266e-07	1.20459e-05	SLC13A4	solute carrier family 13 (sodium/sulfate symporters), member 4 [Source:MGI Symbol;Acc:MGI:2442367]
ENSMUSG00000048406	59.8738	0.625367	0.126225	4.95439	7.25565e-07	1.22087e-05	B330016D10RIK	RIKEN cDNA B330016D10 gene [Source:MGI Symbol;Acc:MGI:2444063]
ENSMUSG00000004268	933.32	0.40947	0.0826599	4.95368	7.28241e-07	1.22431e-05	EMG1	EMG1 N1-specific pseudouridine methyltransferase [Source:MGI Symbol;Acc:MGI:1315195]
ENSMUSG00000045193	832.796	0.55243	0.111578	4.95109	7.38008e-07	1.23857e-05	CIRBP	cold inducible RNA binding protein [Source:MGI Symbol;Acc:MGI:893588]
ENSMUSG00000045337	2.3838	0.731776	0.147798	4.9512	7.37563e-07	1.23857e-05	DEFB11	defensin beta 11 [Source:MGI Symbol;Acc:MGI:2179197]
ENSMUSG00000020424	224.188	-0.451049	0.0911107	-4.95057	7.39976e-07	1.24079e-05	GATSL3	GATS protein-like 3 [Source:MGI Symbol;Acc:MGI:1919212]
ENSMUSG00000105006	26.6051	0.914313	0.184717	4.94982	7.42839e-07	1.24451e-05	GM9484	predicted gene 9484 [Source:MGI Symbol;Acc:MGI:3779894]
ENSMUSG00000027828	2126.52	0.27977	0.0565253	4.94947	7.44153e-07	1.24563e-05	SSR3	signal sequence receptor, gamma [Source:MGI Symbol;Acc:MGI:1914687]
ENSMUSG00000055053	1038.41	-0.328896	0.0664685	-4.94815	7.4921e-07	1.25301e-05	NFIC	nuclear factor I/C [Source:MGI Symbol;Acc:MGI:109591]
ENSMUSG00000023791	598.702	0.535349	0.108205	4.94755	7.51533e-07	1.25581e-05	PIGX	phosphatidylinositol glycan anchor biosynthesis, class X [Source:MGI Symbol;Acc:MGI:1919334]
ENSMUSG00000004105	4.92741	0.90191	0.182379	4.94526	7.60428e-07	1.26957e-05	ANGPTL2	angiopoietin-like 2 [Source:MGI Symbol;Acc:MGI:1347002]
ENSMUSG00000096349	5.11377	0.857543	0.173425	4.94474	7.62469e-07	1.27188e-05	GM22513	predicted gene, 22513 [Source:MGI Symbol;Acc:MGI:5452290]
ENSMUSG00000000776	140.44	-0.447752	0.0905936	-4.94242	7.71572e-07	1.28595e-05	POLR3D	polymerase (RNA) III (DNA directed) polypeptide D [Source:MGI Symbol;Acc:MGI:1914315]
ENSMUSG00000011752	1939.51	-0.28453	0.0575932	-4.94035	7.79829e-07	1.29747e-05	PGAM1	phosphoglycerate mutase 1 [Source:MGI Symbol;Acc:MGI:97552]
ENSMUSG00000035713	794.505	-0.454813	0.0920596	-4.94042	7.79541e-07	1.29747e-05	USP35	ubiquitin specific peptidase 35 [Source:MGI Symbol;Acc:MGI:2685339]
ENSMUSG00000035711	935.117	0.266722	0.0540056	4.93879	7.86106e-07	1.30454e-05	DOK3	docking protein 3 [Source:MGI Symbol;Acc:MGI:1351490]
ENSMUSG00000074754	123.745	0.643014	0.130196	4.93882	7.85966e-07	1.30454e-05	SMIM26	small integral membrane protein 26 [Source:MGI Symbol;Acc:MGI:2685407]
ENSMUSG00000033508	5.54914	0.728133	0.147438	4.93856	7.87011e-07	1.30492e-05	ASPRV1	aspartic peptidase, retroviral-like 1 [Source:MGI Symbol;Acc:MGI:1915105]
ENSMUSG00000006315	847.283	0.453666	0.0918861	4.93727	7.92254e-07	1.31249e-05	TMEM147	transmembrane protein 147 [Source:MGI Symbol;Acc:MGI:1915011]
ENSMUSG00000027406	1029.06	0.308175	0.0624572	4.93418	8.04896e-07	1.33229e-05	IDH3B	isocitrate dehydrogenase 3 (NAD+) beta [Source:MGI Symbol;Acc:MGI:2158650]
ENSMUSG00000003541	160.022	0.804755	0.163123	4.93343	8.07962e-07	1.33598e-05	IER3	immediate early response 3 [Source:MGI Symbol;Acc:MGI:104814]
ENSMUSG00000060224	559.743	0.496353	0.100613	4.9333	8.08512e-07	1.33598e-05	PYROXD2	pyridine nucleotide-disulphide oxidoreductase domain 2 [Source:MGI Symbol;Acc:MGI:1921830]
ENSMUSG00000022708	1169.73	-0.48522	0.0983618	-4.93301	8.09735e-07	1.33635e-05	ZBTB20	zinc finger and BTB domain containing 20 [Source:MGI Symbol;Acc:MGI:1929213]
ENSMUSG00000100280	155.338	0.596451	0.120912	4.93291	8.10119e-07	1.33635e-05	GM28417	predicted gene 28417 [Source:MGI Symbol;Acc:MGI:5579123]
ENSMUSG00000037202	6.74524	0.754757	0.153031	4.93207	8.13647e-07	1.34102e-05	PRF1	perforin 1 (pore forming protein) [Source:MGI Symbol;Acc:MGI:97551]
ENSMUSG00000028851	818.538	-0.410428	0.0832273	-4.93141	8.16368e-07	1.34436e-05	NUDC	nudC nuclear distribution protein [Source:MGI Symbol;Acc:MGI:106014]
ENSMUSG00000005469	718.605	-0.416129	0.0844611	-4.92687	8.35569e-07	1.3713e-05	PRKACA	protein kinase, cAMP dependent, catalytic, alpha [Source:MGI Symbol;Acc:MGI:97592]
ENSMUSG00000037868	71.512	-0.855253	0.173617	-4.92609	8.38914e-07	1.37562e-05	EGR2	early growth response 2 [Source:MGI Symbol;Acc:MGI:95296]
ENSMUSG00000030019	936.822	0.34417	0.0699003	4.92373	8.49101e-07	1.39114e-05	FBXL14	F-box and leucine-rich repeat protein 14 [Source:MGI Symbol;Acc:MGI:2141676]
ENSMUSG00000014470	1089.63	-0.228761	0.0464657	-4.92321	8.51346e-07	1.39364e-05	RNF166	ring finger protein 166 [Source:MGI Symbol;Acc:MGI:1915968]
ENSMUSG00000107335	11.5138	0.956101	0.194359	4.91924	8.68812e-07	1.42102e-05	GM43372	predicted gene 43372 [Source:MGI Symbol;Acc:MGI:5663509]
ENSMUSG00000085915	4.88918	-0.948578	0.192858	-4.91853	8.71944e-07	1.42494e-05	GM8091	predicted gene 8091 [Source:MGI Symbol;Acc:MGI:3643169]
ENSMUSG00000036078	984.03	-0.342535	0.0696475	-4.91813	8.73759e-07	1.4267e-05	SIGMAR1	sigma non-opioid intracellular receptor 1 [Source:MGI Symbol;Acc:MGI:1195268]
ENSMUSG00000022987	60.0687	-0.809769	0.164659	-4.91785	8.74997e-07	1.42751e-05	ZFP641	zinc finger protein 641 [Source:MGI Symbol;Acc:MGI:2442788]
ENSMUSG00000052139	476.526	-0.402751	0.0819	-4.91759	8.76161e-07	1.4282e-05	BRE	brain and reproductive organ-expressed protein [Source:MGI Symbol;Acc:MGI:1333875]
ENSMUSG00000041891	2215.27	-0.278857	0.0567142	-4.91688	8.79345e-07	1.43218e-05	LMAN1	lectin, mannose-binding, 1 [Source:MGI Symbol;Acc:MGI:1917611]
ENSMUSG00000032103	293.669	0.461338	0.0938406	4.91619	8.82449e-07	1.43602e-05	PUS3	pseudouridine synthase 3 [Source:MGI Symbol;Acc:MGI:1914299]
ENSMUSG00000044957	25.6949	0.855046	0.17394	4.91576	8.84396e-07	1.43798e-05	PP2D1	protein phosphatase 2C-like domain containing 1 [Source:MGI Symbol;Acc:MGI:3612067]
ENSMUSG00000087260	934.279	0.479967	0.0976559	4.91488	8.88375e-07	1.44324e-05	LAMTOR5	late endosomal/lysosomal adaptor, MAPK and MTOR activator 5 [Source:MGI Symbol;Acc:MGI:1915826]
ENSMUSG00000021360	837.757	-0.522292	0.106342	-4.91146	9.04015e-07	1.46741e-05	GCNT2	glucosaminyl (N-acetyl) transferase 2, I-branching enzyme [Source:MGI Symbol;Acc:MGI:1100870]
ENSMUSG00000017057	5086.7	0.236277	0.0481312	4.90901	9.15384e-07	1.48337e-05	IL13RA1	interleukin 13 receptor, alpha 1 [Source:MGI Symbol;Acc:MGI:105052]
ENSMUSG00000024663	9156.34	-0.276045	0.056231	-4.90912	9.14881e-07	1.48337e-05	RAB3IL1	RAB3A interacting protein (rabin3)-like 1 [Source:MGI Symbol;Acc:MGI:1922010]
ENSMUSG00000002109	217.523	0.518833	0.105714	4.90789	9.20618e-07	1.4906e-05	DDB2	damage specific DNA binding protein 2 [Source:MGI Symbol;Acc:MGI:1355314]
ENSMUSG00000070003	1258.18	-0.276725	0.0564027	-4.90624	9.28389e-07	1.50192e-05	SSBP4	single stranded DNA binding protein 4 [Source:MGI Symbol;Acc:MGI:1924150]
ENSMUSG00000041733	432.639	-0.382054	0.0778808	-4.90562	9.31315e-07	1.50443e-05	COQ5	coenzyme Q5 methyltransferase [Source:MGI Symbol;Acc:MGI:1098643]
ENSMUSG00000042589	70.2176	-0.6814	0.138903	-4.90558	9.31502e-07	1.50443e-05	CUX2	cut-like homeobox 2 [Source:MGI Symbol;Acc:MGI:107321]
ENSMUSG00000049760	362.978	0.548735	0.11187	4.90513	9.33638e-07	1.50662e-05	2410015M20RIK	RIKEN cDNA 2410015M20 gene [Source:MGI Symbol;Acc:MGI:2442174]
ENSMUSG00000029397	499.535	0.388654	0.0792565	4.90375	9.40253e-07	1.51603e-05	RCHY1	ring finger and CHY zinc finger domain containing 1 [Source:MGI Symbol;Acc:MGI:1915348]
ENSMUSG00000033434	387.037	0.384164	0.0783532	4.90298	9.43951e-07	1.52072e-05	GTPBP6	GTP binding protein 6 (putative) [Source:MGI Symbol;Acc:MGI:1306825]
ENSMUSG00000031887	272.686	-0.351262	0.0716475	-4.90264	9.45556e-07	1.52204e-05	TRADD	TNFRSF1A-associated via death domain [Source:MGI Symbol;Acc:MGI:109200]
ENSMUSG00000060636	886.839	0.587855	0.119925	4.90186	9.4934e-07	1.52686e-05	RPL35A	ribosomal protein L35A [Source:MGI Symbol;Acc:MGI:1928894]
ENSMUSG00000054428	1345.63	0.409682	0.0835825	4.90153	9.50923e-07	1.52813e-05	ATPIF1	ATPase inhibitory factor 1 [Source:MGI Symbol;Acc:MGI:1196457]
ENSMUSG00000021484	4453.15	-0.300619	0.061376	-4.898	9.68171e-07	1.55455e-05	LMAN2	lectin, mannose-binding 2 [Source:MGI Symbol;Acc:MGI:1914140]
ENSMUSG00000045777	429.774	0.438084	0.0894712	4.89637	9.76225e-07	1.56618e-05	IFITM10	interferon induced transmembrane protein 10 [Source:MGI Symbol;Acc:MGI:2444776]
ENSMUSG00000042396	1390.96	0.406935	0.0831375	4.89473	9.84413e-07	1.578e-05	RBM7	RNA binding motif protein 7 [Source:MGI Symbol;Acc:MGI:1914260]
ENSMUSG00000021518	1130.63	-0.30239	0.0618178	-4.89163	1.00006e-06	1.60175e-05	PTDSS1	phosphatidylserine synthase 1 [Source:MGI Symbol;Acc:MGI:1276575]
ENSMUSG00000046791	520.873	-0.352327	0.0720353	-4.89104	1.00307e-06	1.60524e-05	RIOX1	ribosomal oxygenase 1 [Source:MGI Symbol;Acc:MGI:1919202]
ENSMUSG00000028955	1696.63	0.310677	0.0635316	4.89012	1.00773e-06	1.61137e-05	VAMP3	vesicle-associated membrane protein 3 [Source:MGI Symbol;Acc:MGI:1321389]
ENSMUSG00000018909	852.316	-0.443823	0.0907668	-4.88971	1.00985e-06	1.61306e-05	ARRB1	arrestin, beta 1 [Source:MGI Symbol;Acc:MGI:99473]
ENSMUSG00000024413	1790.77	-0.330507	0.067594	-4.88959	1.01046e-06	1.61306e-05	NPC1	Niemann-Pick type C1 [Source:MGI Symbol;Acc:MGI:1097712]
ENSMUSG00000020340	47.8209	0.951341	0.194654	4.88735	1.02201e-06	1.6288e-05	CYFIP2	cytoplasmic FMR1 interacting protein 2 [Source:MGI Symbol;Acc:MGI:1924134]
ENSMUSG00000072825	11.3317	-0.950586	0.194497	-4.8874	1.02176e-06	1.6288e-05	CEP170B	centrosomal protein 170B [Source:MGI Symbol;Acc:MGI:2145043]
ENSMUSG00000027533	39.8581	-0.885876	0.181277	-4.88686	1.02456e-06	1.63151e-05	FABP5	fatty acid binding protein 5, epidermal [Source:MGI Symbol;Acc:MGI:101790]
ENSMUSG00000025086	304.864	0.576424	0.117992	4.88529	1.03278e-06	1.64189e-05	TRUB1	TruB pseudouridine (psi) synthase family member 1 [Source:MGI Symbol;Acc:MGI:1919383]
ENSMUSG00000061028	420.708	0.459477	0.0940754	4.88413	1.03884e-06	1.65018e-05	CLASRP	CLK4-associating serine/arginine rich protein [Source:MGI Symbol;Acc:MGI:1855695]
ENSMUSG00000058488	39.6434	0.762452	0.156118	4.88381	1.04058e-06	1.65022e-05	KL	klotho [Source:MGI Symbol;Acc:MGI:1101771]
ENSMUSG00000099162	17.7688	0.912966	0.186937	4.88381	1.04056e-06	1.65022e-05	GM27168	predicted gene 27168 [Source:MGI Symbol;Acc:MGI:5521011]
ENSMUSG00000039747	1953.03	-0.305541	0.0626195	-4.87933	1.06446e-06	1.68671e-05	ORAI2	ORAI calcium release-activated calcium modulator 2 [Source:MGI Symbol;Acc:MGI:2443195]
ENSMUSG00000019969	2962.83	-0.324005	0.0664082	-4.87899	1.06632e-06	1.68827e-05	PSEN1	presenilin 1 [Source:MGI Symbol;Acc:MGI:1202717]
ENSMUSG00000029066	448.802	0.549961	0.112734	4.87839	1.06956e-06	1.69201e-05	MRPL20	mitochondrial ribosomal protein L20 [Source:MGI Symbol;Acc:MGI:2137221]
ENSMUSG00000049422	24.3839	0.916403	0.187891	4.87731	1.0754e-06	1.69985e-05	CHCHD10	coiled-coil-helix-coiled-coil-helix domain containing 10 [Source:MGI Symbol;Acc:MGI:2143558]
ENSMUSG00000052369	746.962	-0.300715	0.0616724	-4.87601	1.08253e-06	1.70972e-05	TMEM106C	transmembrane protein 106C [Source:MGI Symbol;Acc:MGI:1196384]
ENSMUSG00000024925	356.629	0.361026	0.0740475	4.8756	1.08481e-06	1.71137e-05	RNASEH2C	ribonuclease H2, subunit C [Source:MGI Symbol;Acc:MGI:1915459]
ENSMUSG00000091994	62.7891	0.706749	0.144959	4.8755	1.08535e-06	1.71137e-05	E130317F20RIK	RIKEN cDNA E130317F20 gene [Source:MGI Symbol;Acc:MGI:3041202]
ENSMUSG00000095024	15.9147	0.929647	0.190735	4.87402	1.09349e-06	1.72281e-05	GM5458	predicted gene 5458 [Source:MGI Symbol;Acc:MGI:3646663]
ENSMUSG00000034248	832.029	0.462976	0.0950407	4.87134	1.10843e-06	1.74492e-05	SLC25A37	solute carrier family 25, member 37 [Source:MGI Symbol;Acc:MGI:1914962]
ENSMUSG00000024892	172.291	-0.546122	0.112133	-4.87029	1.11435e-06	1.7528e-05	PCX	pyruvate carboxylase [Source:MGI Symbol;Acc:MGI:97520]
ENSMUSG00000078578	5574.05	0.289402	0.059425	4.87004	1.11577e-06	1.75362e-05	UBE2D3	ubiquitin-conjugating enzyme E2D 3 [Source:MGI Symbol;Acc:MGI:1913355]
ENSMUSG00000053964	74.344	0.640174	0.131481	4.86896	1.12186e-06	1.76175e-05	LGALS4	lectin, galactose binding, soluble 4 [Source:MGI Symbol;Acc:MGI:107536]
ENSMUSG00000049676	59.6511	0.820647	0.168559	4.8686	1.12391e-06	1.76354e-05	CATSPERG1	cation channel sperm associated auxiliary subunit gamma 1 [Source:MGI Symbol;Acc:MGI:2443617]
ENSMUSG00000029634	1137.13	-0.295345	0.0606659	-4.86839	1.12513e-06	1.76402e-05	RNF6	ring finger protein (C3H2C3 type) 6 [Source:MGI Symbol;Acc:MGI:1921382]
ENSMUSG00000090733	1439.52	0.681732	0.140042	4.86804	1.12711e-06	1.76568e-05	RPS27	ribosomal protein S27 [Source:MGI Symbol;Acc:MGI:1888676]
ENSMUSG00000094590	65.3151	0.758909	0.15593	4.86697	1.13322e-06	1.77382e-05	GM10251	predicted gene 10251 [Source:MGI Symbol;Acc:MGI:3704424]
ENSMUSG00000020485	785.13	0.562437	0.115575	4.86644	1.13627e-06	1.77715e-05	SUPT4A	suppressor of Ty 4A [Source:MGI Symbol;Acc:MGI:107416]
ENSMUSG00000008683	469.692	0.61419	0.126227	4.86575	1.14025e-06	1.7799e-05	RPS15A	ribosomal protein S15A [Source:MGI Symbol;Acc:MGI:2389091]
ENSMUSG00000021495	720.897	0.527746	0.108463	4.86567	1.14069e-06	1.7799e-05	FAM193B	family with sequence similarity 193, member B [Source:MGI Symbol;Acc:MGI:2385851]
ENSMUSG00000041958	1234.94	-0.387462	0.079632	-4.86565	1.14079e-06	1.7799e-05	PIGS	phosphatidylinositol glycan anchor biosynthesis, class S [Source:MGI Symbol;Acc:MGI:2687325]
ENSMUSG00000046463	127.629	0.442341	0.0909335	4.86445	1.14776e-06	1.78932e-05	5930403N24RIK	RIKEN cDNA 5930403N24 gene [Source:MGI Symbol;Acc:MGI:2444171]
ENSMUSG00000064193	287.205	-0.478403	0.0983696	-4.86333	1.1543e-06	1.79806e-05	GM4735	predicted gene 4735 [Source:MGI Symbol;Acc:MGI:3645521]
ENSMUSG00000025856	248.867	-0.507464	0.104451	-4.8584	1.18336e-06	1.84185e-05	PDGFA	platelet derived growth factor, alpha [Source:MGI Symbol;Acc:MGI:97527]
ENSMUSG00000064360	582.351	0.879855	0.181191	4.85596	1.19808e-06	1.86325e-05	MT-ND3	mitochondrially encoded NADH dehydrogenase 3 [Source:MGI Symbol;Acc:MGI:102499]
ENSMUSG00000082029	76.5909	0.640832	0.131979	4.85554	1.20057e-06	1.86562e-05	H3F3C	H3 histone, family 3C [Source:MGI Symbol;Acc:MGI:3650546]
ENSMUSG00000001750	5407.61	0.348453	0.0718304	4.85105	1.22808e-06	1.90683e-05	TCIRG1	T cell, immune regulator 1, ATPase, H+ transporting, lysosomal V0 protein A3 [Source:MGI Symbol;Acc:MGI:1350931]
ENSMUSG00000030083	961.428	0.215146	0.0443705	4.84886	1.24175e-06	1.92651e-05	ABTB1	ankyrin repeat and BTB (POZ) domain containing 1 [Source:MGI Symbol;Acc:MGI:1933148]
ENSMUSG00000009555	2434.08	0.179331	0.0369903	4.84806	1.24674e-06	1.93152e-05	CDK9	cyclin-dependent kinase 9 (CDC2-related kinase) [Source:MGI Symbol;Acc:MGI:1328368]
ENSMUSG00000059939	365.804	0.462138	0.095325	4.84802	1.24698e-06	1.93152e-05	9430015G10RIK	RIKEN cDNA 9430015G10 gene [Source:MGI Symbol;Acc:MGI:2444364]
ENSMUSG00000028672	1117.14	0.390091	0.0804752	4.84734	1.2513e-06	1.93665e-05	HMGCL	3-hydroxy-3-methylglutaryl-Coenzyme A lyase [Source:MGI Symbol;Acc:MGI:96158]
ENSMUSG00000004864	5.73799	0.78912	0.162807	4.84697	1.25359e-06	1.93865e-05	MAPK13	mitogen-activated protein kinase 13 [Source:MGI Symbol;Acc:MGI:1346864]
ENSMUSG00000074580	35.1551	0.7466	0.154062	4.84611	1.25903e-06	1.9455e-05	4931440P22RIK	RIKEN cDNA 4931440P22 gene [Source:MGI Symbol;Acc:MGI:1918254]
ENSMUSG00000060216	4601.38	0.369548	0.0762814	4.84453	1.26911e-06	1.95951e-05	ARRB2	arrestin, beta 2 [Source:MGI Symbol;Acc:MGI:99474]
ENSMUSG00000063698	172.58	0.518802	0.107155	4.8416	1.288e-06	1.98709e-05	SFXN4	sideroflexin 4 [Source:MGI Symbol;Acc:MGI:2137680]
ENSMUSG00000030037	237.957	0.581811	0.120182	4.84106	1.29145e-06	1.99082e-05	MRPL53	mitochondrial ribosomal protein L53 [Source:MGI Symbol;Acc:MGI:1915749]
ENSMUSG00000007655	37.399	-0.855052	0.176669	-4.83985	1.2994e-06	2.00147e-05	CAV1	caveolin 1, caveolae protein [Source:MGI Symbol;Acc:MGI:102709]
ENSMUSG00000069020	211.831	0.446647	0.0923101	4.83855	1.30789e-06	2.01134e-05	URM1	ubiquitin related modifier 1 [Source:MGI Symbol;Acc:MGI:1915455]
ENSMUSG00000075593	6790.72	-0.222628	0.0460099	-4.83869	1.30696e-06	2.01134e-05	GAL3ST4	galactose-3-O-sulfotransferase 4 [Source:MGI Symbol;Acc:MGI:1916254]
ENSMUSG00000028063	67.4959	-0.762697	0.157644	-4.83809	1.31095e-06	2.01444e-05	LMNA	lamin A [Source:MGI Symbol;Acc:MGI:96794]
ENSMUSG00000028465	4775.41	-0.513627	0.106175	-4.83754	1.31455e-06	2.01836e-05	TLN1	talin 1 [Source:MGI Symbol;Acc:MGI:1099832]
ENSMUSG00000018102	419.033	0.468413	0.0968452	4.83672	1.31997e-06	2.02346e-05	HIST1H2BC	histone cluster 1, H2bc [Source:MGI Symbol;Acc:MGI:1915274]
ENSMUSG00000063439	184.386	0.553863	0.114509	4.83684	1.31922e-06	2.02346e-05	B9D2	B9 protein domain 2 [Source:MGI Symbol;Acc:MGI:2387643]
ENSMUSG00000025173	1813.89	0.28248	0.0584665	4.83149	1.35518e-06	2.06912e-05	WDR45B	WD repeat domain 45B [Source:MGI Symbol;Acc:MGI:1914090]
ENSMUSG00000027215	3626.34	-0.339327	0.0702346	-4.83134	1.35618e-06	2.06912e-05	CD82	CD82 antigen [Source:MGI Symbol;Acc:MGI:104651]
ENSMUSG00000031378	2115.86	-0.295793	0.0612217	-4.83151	1.35501e-06	2.06912e-05	ABCD1	ATP-binding cassette, sub-family D (ALD), member 1 [Source:MGI Symbol;Acc:MGI:1349215]
ENSMUSG00000041164	744.37	-0.42586	0.0881365	-4.83182	1.35289e-06	2.06912e-05	ZMIZ2	zinc finger, MIZ-type containing 2 [Source:MGI Symbol;Acc:MGI:106374]
ENSMUSG00000058748	238.741	0.50756	0.105054	4.8314	1.35578e-06	2.06912e-05	ZFP958	zinc finger protein 958 [Source:MGI Symbol;Acc:MGI:2385298]
ENSMUSG00000024800	256.872	0.461579	0.0955491	4.8308	1.35983e-06	2.07304e-05	RPP30	ribonuclease P/MRP 30 subunit [Source:MGI Symbol;Acc:MGI:1859683]
ENSMUSG00000030147	12.1479	0.918274	0.190097	4.83055	1.36156e-06	2.07404e-05	CLEC4B1	C-type lectin domain family 4, member b1 [Source:MGI Symbol;Acc:MGI:1917060]
ENSMUSG00000028128	33.6079	-0.890368	0.184347	-4.82984	1.36642e-06	2.0798e-05	F3	coagulation factor III [Source:MGI Symbol;Acc:MGI:88381]
ENSMUSG00000020120	7862.23	-0.366401	0.0759526	-4.82408	1.40649e-06	2.13911e-05	PLEK	pleckstrin [Source:MGI Symbol;Acc:MGI:1860485]
ENSMUSG00000028967	469.922	-0.376313	0.0780167	-4.8235	1.41064e-06	2.14372e-05	ERRFI1	ERBB receptor feedback inhibitor 1 [Source:MGI Symbol;Acc:MGI:1921405]
ENSMUSG00000020484	5615.04	-0.264071	0.0547811	-4.82048	1.43212e-06	2.17369e-05	XBP1	X-box binding protein 1 [Source:MGI Symbol;Acc:MGI:98970]
ENSMUSG00000059713	563.983	-0.433951	0.0900236	-4.82041	1.43261e-06	2.17369e-05	RCAN3	regulator of calcineurin 3 [Source:MGI Symbol;Acc:MGI:1858220]
ENSMUSG00000105827	2.79378	0.739395	0.1534	4.82004	1.43528e-06	2.17604e-05	HIST2H2BB	histone cluster 2, H2bb [Source:MGI Symbol;Acc:MGI:2448413]
ENSMUSG00000009575	174.818	-0.620667	0.128877	-4.81597	1.46489e-06	2.21918e-05	CBX5	chromobox 5 [Source:MGI Symbol;Acc:MGI:109372]
ENSMUSG00000020964	3382.81	-0.36482	0.0758275	-4.81119	1.50038e-06	2.27116e-05	SEL1L	sel-1 suppressor of lin-12-like (C. elegans) [Source:MGI Symbol;Acc:MGI:1329016]
ENSMUSG00000020399	5499.7	-0.243004	0.0505238	-4.80969	1.51166e-06	2.28287e-05	HAVCR2	hepatitis A virus cellular receptor 2 [Source:MGI Symbol;Acc:MGI:2159682]
ENSMUSG00000049751	1117.33	0.422483	0.0878371	4.80984	1.51048e-06	2.28287e-05	RPL36AL	ribosomal protein L36A-like [Source:MGI Symbol;Acc:MGI:1913733]
ENSMUSG00000062515	4.80076	0.72883	0.151531	4.80979	1.51091e-06	2.28287e-05	FABP4	fatty acid binding protein 4, adipocyte [Source:MGI Symbol;Acc:MGI:88038]
ENSMUSG00000030124	914.905	-0.547854	0.113922	-4.80902	1.51676e-06	2.28877e-05	LAG3	lymphocyte-activation gene 3 [Source:MGI Symbol;Acc:MGI:106588]
ENSMUSG00000052146	676.568	0.513368	0.106788	4.80735	1.52943e-06	2.30609e-05	RPS10	ribosomal protein S10 [Source:MGI Symbol;Acc:MGI:1914347]
ENSMUSG00000015837	3816.13	-0.307356	0.0639665	-4.80496	1.54786e-06	2.33199e-05	SQSTM1	sequestosome 1 [Source:MGI Symbol;Acc:MGI:107931]
ENSMUSG00000028461	654.233	0.511211	0.106396	4.80481	1.54902e-06	2.33199e-05	CCDC107	coiled-coil domain containing 107 [Source:MGI Symbol;Acc:MGI:1913423]
ENSMUSG00000004655	3.67152	0.76889	0.160141	4.80133	1.57618e-06	2.37102e-05	AQP1	aquaporin 1 [Source:MGI Symbol;Acc:MGI:103201]
ENSMUSG00000024137	703.559	0.341699	0.0711716	4.80106	1.57825e-06	2.37229e-05	E4F1	E4F transcription factor 1 [Source:MGI Symbol;Acc:MGI:109530]
ENSMUSG00000022884	2523.46	0.349835	0.0728698	4.80082	1.58016e-06	2.37332e-05	EIF4A2	eukaryotic translation initiation factor 4A2 [Source:MGI Symbol;Acc:MGI:106906]
ENSMUSG00000016206	1100.62	-0.388178	0.0808663	-4.80024	1.58477e-06	2.37839e-05	H2-M3	histocompatibility 2, M region locus 3 [Source:MGI Symbol;Acc:MGI:95915]
ENSMUSG00000000817	2.71575	0.673569	0.140338	4.79963	1.58962e-06	2.38381e-05	FASL	Fas ligand (TNF superfamily, member 6) [Source:MGI Symbol;Acc:MGI:99255]
ENSMUSG00000043190	171.197	0.496419	0.103453	4.79852	1.59841e-06	2.39513e-05	RFESD	Rieske (Fe-S) domain containing [Source:MGI Symbol;Acc:MGI:2145198]
ENSMUSG00000021606	407.229	0.483602	0.100801	4.7976	1.60574e-06	2.40426e-05	NDUFS6	NADH dehydrogenase (ubiquinone) Fe-S protein 6 [Source:MGI Symbol;Acc:MGI:107932]
ENSMUSG00000090019	336.821	-0.47143	0.0982737	-4.79711	1.60968e-06	2.40829e-05	GIMAP1	GTPase, IMAP family member 1 [Source:MGI Symbol;Acc:MGI:109368]
ENSMUSG00000026289	833.28	0.293523	0.0611965	4.7964	1.61543e-06	2.415e-05	ATG16L1	autophagy related 16-like 1 (S. cerevisiae) [Source:MGI Symbol;Acc:MGI:1924290]
ENSMUSG00000022940	475.034	0.450398	0.0939141	4.79585	1.61988e-06	2.41979e-05	PIGP	phosphatidylinositol glycan anchor biosynthesis, class P [Source:MGI Symbol;Acc:MGI:1860433]
ENSMUSG00000024208	376.146	0.643874	0.134318	4.79364	1.63782e-06	2.44099e-05	UQCC2	ubiquinol-cytochrome c reductase complex assembly factor 2 [Source:MGI Symbol;Acc:MGI:1914517]
ENSMUSG00000038312	4126.3	-0.252087	0.0525878	-4.79363	1.63786e-06	2.44099e-05	EDEM2	ER degradation enhancer, mannosidase alpha-like 2 [Source:MGI Symbol;Acc:MGI:1915540]
ENSMUSG00000022450	473.232	0.381156	0.0795278	4.79274	1.6452e-06	2.45002e-05	NDUFA6	NADH dehydrogenase (ubiquinone) 1 alpha subcomplex, 6 (B14) [Source:MGI Symbol;Acc:MGI:1914380]
ENSMUSG00000027562	34.3336	0.916403	0.191249	4.79169	1.65386e-06	2.45913e-05	CAR2	carbonic anhydrase 2 [Source:MGI Symbol;Acc:MGI:88269]
ENSMUSG00000057863	669.695	0.606073	0.126481	4.79183	1.65268e-06	2.45913e-05	RPL36	ribosomal protein L36 [Source:MGI Symbol;Acc:MGI:1860603]
ENSMUSG00000044408	1608.82	0.457947	0.0956351	4.78848	1.68051e-06	2.49684e-05	SPTSSA	serine palmitoyltransferase, small subunit A [Source:MGI Symbol;Acc:MGI:1913399]
ENSMUSG00000057058	2.63387	0.705576	0.147384	4.78734	1.69009e-06	2.50913e-05	SKAP1	src family associated phosphoprotein 1 [Source:MGI Symbol;Acc:MGI:1925723]
ENSMUSG00000006289	1206.63	0.247538	0.0517094	4.7871	1.69212e-06	2.51021e-05	OSGEP	O-sialoglycoprotein endopeptidase [Source:MGI Symbol;Acc:MGI:1913496]
ENSMUSG00000033209	622.147	-0.469174	0.0980906	-4.78307	1.72636e-06	2.55905e-05	TTC28	tetratricopeptide repeat domain 28 [Source:MGI Symbol;Acc:MGI:2140873]
ENSMUSG00000034422	523.966	-0.520614	0.108904	-4.78047	1.74886e-06	2.5904e-05	PARP14	poly (ADP-ribose) polymerase family, member 14 [Source:MGI Symbol;Acc:MGI:1919489]
ENSMUSG00000051497	49.3883	-0.789814	0.165263	-4.77912	1.76063e-06	2.60585e-05	KCNJ16	potassium inwardly-rectifying channel, subfamily J, member 16 [Source:MGI Symbol;Acc:MGI:1314842]
ENSMUSG00000020917	3828.85	-0.406728	0.0851119	-4.77875	1.76391e-06	2.6087e-05	ACLY	ATP citrate lyase [Source:MGI Symbol;Acc:MGI:103251]
ENSMUSG00000026049	108.172	0.691197	0.144675	4.77757	1.77424e-06	2.62196e-05	TEX30	testis expressed 30 [Source:MGI Symbol;Acc:MGI:1922873]
ENSMUSG00000002897	4497.72	-0.355608	0.0744555	-4.77611	1.7872e-06	2.63909e-05	IL17RA	interleukin 17 receptor A [Source:MGI Symbol;Acc:MGI:107399]
ENSMUSG00000004896	499.22	0.451594	0.094565	4.77549	1.79268e-06	2.64277e-05	RRNAD1	ribosomal RNA adenine dimethylase domain containing 1 [Source:MGI Symbol;Acc:MGI:2387197]
ENSMUSG00000056174	4.78297	0.751772	0.157427	4.77537	1.7938e-06	2.64277e-05	COL8A2	collagen, type VIII, alpha 2 [Source:MGI Symbol;Acc:MGI:88464]
ENSMUSG00000063931	1652.44	-0.238691	0.0500795	-4.76625	1.87688e-06	2.76307e-05	PEPD	peptidase D [Source:MGI Symbol;Acc:MGI:97542]
ENSMUSG00000035171	396.79	0.49543	0.10398	4.76467	1.89159e-06	2.7826e-05	1110059E24RIK	RIKEN cDNA 1110059E24 gene [Source:MGI Symbol;Acc:MGI:1913456]
ENSMUSG00000040687	1135.47	-0.38166	0.0801114	-4.76412	1.89682e-06	2.78817e-05	MADD	MAP-kinase activating death domain [Source:MGI Symbol;Acc:MGI:2444672]
ENSMUSG00000002635	431.038	0.329629	0.0692715	4.7585	1.95033e-06	2.86463e-05	PDCD2L	programmed cell death 2-like [Source:MGI Symbol;Acc:MGI:1915329]
ENSMUSG00000035165	2.07479	0.713704	0.150025	4.75722	1.96274e-06	2.88068e-05	KCNE3	potassium voltage-gated channel, Isk-related subfamily, gene 3 [Source:MGI Symbol;Acc:MGI:1891124]
ENSMUSG00000027566	1581.9	0.502284	0.105687	4.75258	2.00838e-06	2.94377e-05	PSMA7	proteasome (prosome, macropain) subunit, alpha type 7 [Source:MGI Symbol;Acc:MGI:1347070]
ENSMUSG00000038811	1687.65	0.489689	0.103037	4.75254	2.00878e-06	2.94377e-05	GNGT2	guanine nucleotide binding protein (G protein), gamma transducing activity polypeptide 2 [Source:MGI Symbol;Acc:MGI:893584]
ENSMUSG00000012017	275.151	-0.367718	0.0773795	-4.75214	2.01276e-06	2.94559e-05	SCARF2	scavenger receptor class F, member 2 [Source:MGI Symbol;Acc:MGI:1858430]
ENSMUSG00000018428	249.102	-0.612455	0.128885	-4.75195	2.0146e-06	2.94559e-05	AKAP1	A kinase (PRKA) anchor protein 1 [Source:MGI Symbol;Acc:MGI:104729]
ENSMUSG00000066900	455.055	0.319512	0.067236	4.7521	2.01315e-06	2.94559e-05	SUDS3	suppressor of defective silencing 3 homolog (S. cerevisiae) [Source:MGI Symbol;Acc:MGI:1919204]
ENSMUSG00000018500	3.45299	0.801437	0.168671	4.75148	2.01932e-06	2.95026e-05	ADORA2B	adenosine A2b receptor [Source:MGI Symbol;Acc:MGI:99403]
ENSMUSG00000041827	32.8024	-0.924511	0.194595	-4.75095	2.02458e-06	2.95215e-05	OASL1	2'-5' oligoadenylate synthetase-like 1 [Source:MGI Symbol;Acc:MGI:2180849]
ENSMUSG00000050921	2.97479	0.661485	0.139228	4.75108	2.02328e-06	2.95215e-05	P2RY10	purinergic receptor P2Y, G-protein coupled 10 [Source:MGI Symbol;Acc:MGI:1926076]
ENSMUSG00000072915	317.938	-0.547831	0.115311	-4.75089	2.0252e-06	2.95215e-05	GM12258	predicted gene 12258 [Source:MGI Symbol;Acc:MGI:3651534]
ENSMUSG00000061175	578.934	-0.433209	0.091204	-4.7499	2.03522e-06	2.96451e-05	FNIP2	folliculin interacting protein 2 [Source:MGI Symbol;Acc:MGI:2683054]
ENSMUSG00000007589	397.439	0.413961	0.0871736	4.7487	2.04732e-06	2.97826e-05	TINF2	Terf1 (TRF1)-interacting nuclear factor 2 [Source:MGI Symbol;Acc:MGI:107246]
ENSMUSG00000027845	374.576	0.404944	0.0852755	4.74865	2.04775e-06	2.97826e-05	DCLRE1B	DNA cross-link repair 1B [Source:MGI Symbol;Acc:MGI:2156057]
ENSMUSG00000048277	5668.43	-0.315099	0.0663746	-4.74729	2.06165e-06	2.99622e-05	SYNGR2	synaptogyrin 2 [Source:MGI Symbol;Acc:MGI:1328324]
ENSMUSG00000075706	1862.57	0.640872	0.135008	4.74692	2.06538e-06	2.99939e-05	GPX4	glutathione peroxidase 4 [Source:MGI Symbol;Acc:MGI:104767]
ENSMUSG00000020097	8344.78	-0.37206	0.0784104	-4.74503	2.08474e-06	3.02523e-05	SGPL1	sphingosine phosphate lyase 1 [Source:MGI Symbol;Acc:MGI:1261415]
ENSMUSG00000045551	28.0002	0.786847	0.165856	4.74416	2.09378e-06	3.03606e-05	FPR1	formyl peptide receptor 1 [Source:MGI Symbol;Acc:MGI:107443]
ENSMUSG00000040883	57.6188	-0.692045	0.1459	-4.74329	2.10274e-06	3.04676e-05	TMEM205	transmembrane protein 205 [Source:MGI Symbol;Acc:MGI:3045495]
ENSMUSG00000066880	494.443	0.445686	0.0939739	4.74266	2.10934e-06	3.05403e-05	ZFP617	zinc finger protein 617 [Source:MGI Symbol;Acc:MGI:2684459]
ENSMUSG00000026564	323.415	-0.620595	0.130869	-4.74211	2.11504e-06	3.0577e-05	DUSP27	dual specificity phosphatase 27 (putative) [Source:MGI Symbol;Acc:MGI:2685055]
ENSMUSG00000027423	5793.03	0.224754	0.0473951	4.74214	2.11473e-06	3.0577e-05	SNX5	sorting nexin 5 [Source:MGI Symbol;Acc:MGI:1916428]
ENSMUSG00000054072	39.7561	-0.857262	0.180847	-4.74027	2.13437e-06	3.08333e-05	IIGP1	interferon inducible GTPase 1 [Source:MGI Symbol;Acc:MGI:1926259]
ENSMUSG00000028581	65002.8	-0.399594	0.0843365	-4.7381	2.15736e-06	3.11421e-05	LAPTM5	lysosomal-associated protein transmembrane 5 [Source:MGI Symbol;Acc:MGI:108046]
ENSMUSG00000024645	527.372	0.314529	0.0663892	4.73765	2.16212e-06	3.11875e-05	TIMM21	tranlocase of inner mitochondrial membrane 21 [Source:MGI Symbol;Acc:MGI:1920595]
ENSMUSG00000004933	1732.13	0.386089	0.0815309	4.73549	2.18529e-06	3.14747e-05	MATK	megakaryocyte-associated tyrosine kinase [Source:MGI Symbol;Acc:MGI:99259]
ENSMUSG00000042111	791.858	0.337343	0.0712701	4.73331	2.20891e-06	3.17912e-05	CCDC115	coiled-coil domain containing 115 [Source:MGI Symbol;Acc:MGI:1916918]
ENSMUSG00000035295	39.0373	-0.771849	0.163122	-4.73172	2.22628e-06	3.19459e-05	WDR38	WD repeat domain 38 [Source:MGI Symbol;Acc:MGI:1923896]
ENSMUSG00000060639	19.8447	0.920857	0.194609	4.73182	2.22516e-06	3.19459e-05	HIST1H4I	histone cluster 1, H4i [Source:MGI Symbol;Acc:MGI:2448432]
ENSMUSG00000070729	89.7433	0.589848	0.124658	4.73172	2.22627e-06	3.19459e-05	GM12966	predicted gene 12966 [Source:MGI Symbol;Acc:MGI:3652043]
ENSMUSG00000029313	588.356	-0.504579	0.106667	-4.73043	2.24048e-06	3.21257e-05	AFF1	AF4/FMR2 family, member 1 [Source:MGI Symbol;Acc:MGI:1100819]
ENSMUSG00000100465	11.4107	0.910067	0.192444	4.729	2.25626e-06	3.2328e-05	GM29264	predicted gene 29264 [Source:MGI Symbol;Acc:MGI:5579970]
ENSMUSG00000018001	1250.86	-0.306205	0.0647593	-4.72836	2.26337e-06	3.24058e-05	CYTH3	cytohesin 3 [Source:MGI Symbol;Acc:MGI:1335107]
ENSMUSG00000037072	4846.73	0.424458	0.089805	4.72645	2.28482e-06	3.26887e-05	SELENOF	selenoprotein F [Source:MGI Symbol;Acc:MGI:1927947]
ENSMUSG00000057236	2906.81	0.388315	0.0821781	4.72529	2.29791e-06	3.28517e-05	RBBP4	retinoblastoma binding protein 4, chromatin remodeling factor [Source:MGI Symbol;Acc:MGI:1194912]
ENSMUSG00000088030	1.836	0.664801	0.140753	4.72316	2.32211e-06	3.31731e-05	GM24991	predicted gene, 24991 [Source:MGI Symbol;Acc:MGI:5454768]
ENSMUSG00000008668	1289.73	0.605164	0.128181	4.72115	2.3451e-06	3.34766e-05	RPS18	ribosomal protein S18 [Source:MGI Symbol;Acc:MGI:98146]
ENSMUSG00000027368	33.8808	0.842135	0.178388	4.7208	2.3492e-06	3.35103e-05	DUSP2	dual specificity phosphatase 2 [Source:MGI Symbol;Acc:MGI:101911]
ENSMUSG00000017412	21.2195	-0.911115	0.193084	-4.71875	2.37293e-06	3.38214e-05	CACNB4	calcium channel, voltage-dependent, beta 4 subunit [Source:MGI Symbol;Acc:MGI:103301]
ENSMUSG00000053706	51.1995	-0.858094	0.181853	-4.71862	2.37451e-06	3.38214e-05	B430305J03RIK	RIKEN cDNA B430305J03 gene [Source:MGI Symbol;Acc:MGI:3697707]
ENSMUSG00000001751	3427.95	-0.352647	0.074755	-4.71737	2.38909e-06	3.4004e-05	NAGLU	alpha-N-acetylglucosaminidase (Sanfilippo disease IIIB) [Source:MGI Symbol;Acc:MGI:1351641]
ENSMUSG00000091183	208.612	0.556593	0.117997	4.71701	2.39339e-06	3.40402e-05	GM5141	predicted gene 5141 [Source:MGI Symbol;Acc:MGI:3779466]
ENSMUSG00000097093	44.3884	0.623192	0.132124	4.71673	2.39668e-06	3.40618e-05	C330013E15RIK	RIKEN cDNA C330013E15 gene [Source:MGI Symbol;Acc:MGI:1925695]
ENSMUSG00000033781	762.944	-0.261017	0.0553442	-4.71625	2.40227e-06	3.41161e-05	ASB13	ankyrin repeat and SOCS box-containing 13 [Source:MGI Symbol;Acc:MGI:2145525]
ENSMUSG00000027170	887.372	0.361794	0.0767185	4.71587	2.40685e-06	3.41561e-05	EIF3M	eukaryotic translation initiation factor 3, subunit M [Source:MGI Symbol;Acc:MGI:1351744]
ENSMUSG00000036570	6.61	0.842145	0.178591	4.7155	2.41118e-06	3.41924e-05	FXYD1	FXYD domain-containing ion transport regulator 1 [Source:MGI Symbol;Acc:MGI:1889273]
ENSMUSG00000040410	506.127	0.385144	0.0816911	4.71464	2.42143e-06	3.43125e-05	FBXL4	F-box and leucine-rich repeat protein 4 [Source:MGI Symbol;Acc:MGI:2140367]
ENSMUSG00000022108	70458.9	-0.196258	0.0416296	-4.71438	2.42444e-06	3.433e-05	ITM2B	integral membrane protein 2B [Source:MGI Symbol;Acc:MGI:1309517]
ENSMUSG00000065701	2.95461	0.790181	0.167619	4.71415	2.42717e-06	3.43433e-05	RNY1	RNA, Y1 small cytoplasmic, Ro-associated [Source:MGI Symbol;Acc:MGI:97995]
ENSMUSG00000021266	954.603	-0.364844	0.0774256	-4.71219	2.45063e-06	3.46342e-05	WARS	tryptophanyl-tRNA synthetase [Source:MGI Symbol;Acc:MGI:104630]
ENSMUSG00000083282	5452.46	-0.226814	0.048134	-4.71214	2.45131e-06	3.46342e-05	CTSF	cathepsin F [Source:MGI Symbol;Acc:MGI:1861434]
ENSMUSG00000064339	18107.9	0.462065	0.0980685	4.71165	2.45716e-06	3.46914e-05	MT-RNR2	mitochondrially encoded 16S rRNA [Source:MGI Symbol;Acc:MGI:102492]
ENSMUSG00000032235	333.991	0.367507	0.0780075	4.71117	2.46294e-06	3.47476e-05	ICE2	interactor of little elongation complex ELL subunit 2 [Source:MGI Symbol;Acc:MGI:2135947]
ENSMUSG00000005846	1247.93	0.28124	0.0597005	4.71084	2.467e-06	3.4754e-05	RSL1D1	ribosomal L1 domain containing 1 [Source:MGI Symbol;Acc:MGI:1913659]
ENSMUSG00000041084	1547.75	0.39708	0.0842894	4.71091	2.46618e-06	3.4754e-05	OSTC	oligosaccharyltransferase complex subunit (non-catalytic) [Source:MGI Symbol;Acc:MGI:1913607]
ENSMUSG00000061032	1704.1	-0.293076	0.0622376	-4.70899	2.48951e-06	3.50456e-05	RRP1	ribosomal RNA processing 1 homolog (S. cerevisiae) [Source:MGI Symbol;Acc:MGI:1203500]
ENSMUSG00000026407	77.225	-0.69432	0.147451	-4.70881	2.4917e-06	3.50508e-05	CACNA1S	calcium channel, voltage-dependent, L type, alpha 1S subunit [Source:MGI Symbol;Acc:MGI:88294]
ENSMUSG00000005034	1558.86	-0.319689	0.0678981	-4.70837	2.49711e-06	3.51014e-05	PRKACB	protein kinase, cAMP dependent, catalytic, beta [Source:MGI Symbol;Acc:MGI:97594]
ENSMUSG00000035215	260.354	0.588197	0.124949	4.70749	2.50789e-06	3.52273e-05	LSM7	LSM7 homolog, U6 small nuclear RNA and mRNA degradation associated [Source:MGI Symbol;Acc:MGI:1913344]
ENSMUSG00000029056	468.732	0.355979	0.0756272	4.70702	2.51362e-06	3.52821e-05	PANK4	pantothenate kinase 4 [Source:MGI Symbol;Acc:MGI:2387466]
ENSMUSG00000068323	3.55322	0.715771	0.152113	4.70552	2.5322e-06	3.5517e-05	SLC4A5	solute carrier family 4, sodium bicarbonate cotransporter, member 5 [Source:MGI Symbol;Acc:MGI:2443220]
ENSMUSG00000038991	1686.28	-0.268683	0.0571071	-4.7049	2.53991e-06	3.55994e-05	TXNDC5	thioredoxin domain containing 5 [Source:MGI Symbol;Acc:MGI:2145316]
ENSMUSG00000059456	1939.76	-0.291699	0.0620017	-4.70469	2.5425e-06	3.56098e-05	PTK2B	PTK2 protein tyrosine kinase 2 beta [Source:MGI Symbol;Acc:MGI:104908]
ENSMUSG00000000982	401.713	-0.703391	0.149543	-4.7036	2.5562e-06	3.57757e-05	CCL3	chemokine (C-C motif) ligand 3 [Source:MGI Symbol;Acc:MGI:98260]
ENSMUSG00000024672	148.007	0.775968	0.165059	4.70116	2.58687e-06	3.61787e-05	MS4A7	membrane-spanning 4-domains, subfamily A, member 7 [Source:MGI Symbol;Acc:MGI:1918846]
ENSMUSG00000091537	825.945	0.484051	0.102974	4.70071	2.59256e-06	3.6232e-05	TMA7	translational machinery associated 7 [Source:MGI Symbol;Acc:MGI:1913417]
ENSMUSG00000025781	1878.36	0.399859	0.085128	4.69715	2.63815e-06	3.68425e-05	ATP5C1	ATP synthase, H+ transporting, mitochondrial F1 complex, gamma polypeptide 1 [Source:MGI Symbol;Acc:MGI:1261437]
ENSMUSG00000060093	1.73175	0.696277	0.148242	4.69691	2.64125e-06	3.68591e-05	HIST1H4A	histone cluster 1, H4a [Source:MGI Symbol;Acc:MGI:2448419]
ENSMUSG00000044080	128.953	0.609298	0.129817	4.69353	2.68531e-06	3.74469e-05	S100A1	S100 calcium binding protein A1 [Source:MGI Symbol;Acc:MGI:1338917]
ENSMUSG00000035595	91.7875	0.590039	0.125839	4.68885	2.74749e-06	3.82863e-05	1600002K03RIK	RIKEN cDNA 1600002K03 gene [Source:MGI Symbol;Acc:MGI:1917020]
ENSMUSG00000039108	56.8787	0.744492	0.15881	4.68794	2.75969e-06	3.84286e-05	LSM14B	LSM family member 14B [Source:MGI Symbol;Acc:MGI:3040677]
ENSMUSG00000093843	7.46669	0.856483	0.182737	4.68696	2.7729e-06	3.85847e-05	GM25939	predicted gene, 25939 [Source:MGI Symbol;Acc:MGI:5455716]
ENSMUSG00000001017	1320.28	0.272332	0.0581115	4.68638	2.78077e-06	3.86663e-05	CHTOP	chromatin target of PRMT1 [Source:MGI Symbol;Acc:MGI:1913761]
ENSMUSG00000048440	186.866	-0.455591	0.0972362	-4.68541	2.79405e-06	3.8823e-05	CYP4F16	cytochrome P450, family 4, subfamily f, polypeptide 16 [Source:MGI Symbol;Acc:MGI:1917351]
ENSMUSG00000019868	740.37	0.269686	0.057569	4.68457	2.80547e-06	3.89415e-05	VTA1	vesicle (multivesicular body) trafficking 1 [Source:MGI Symbol;Acc:MGI:1913451]
ENSMUSG00000020196	1348.37	-0.258628	0.0552095	-4.68449	2.80661e-06	3.89415e-05	CABIN1	calcineurin binding protein 1 [Source:MGI Symbol;Acc:MGI:1298375]
ENSMUSG00000078713	394.178	0.627903	0.134077	4.68314	2.82519e-06	3.9171e-05	TOMM5	translocase of outer mitochondrial membrane 5 homolog (yeast) [Source:MGI Symbol;Acc:MGI:1915762]
ENSMUSG00000022037	77.2171	0.911454	0.194653	4.68245	2.83463e-06	3.92456e-05	CLU	clusterin [Source:MGI Symbol;Acc:MGI:88423]
ENSMUSG00000068227	12.1762	0.633812	0.135358	4.68249	2.83408e-06	3.92456e-05	IL2RB	interleukin 2 receptor, beta chain [Source:MGI Symbol;Acc:MGI:96550]
ENSMUSG00000024319	899.886	-0.218978	0.0467703	-4.68198	2.84123e-06	3.93087e-05	VPS52	VPS52 GARP complex subunit [Source:MGI Symbol;Acc:MGI:1330304]
ENSMUSG00000029470	2409.12	-0.282665	0.0604007	-4.67984	2.87105e-06	3.96929e-05	P2RX4	purinergic receptor P2X, ligand-gated ion channel 4 [Source:MGI Symbol;Acc:MGI:1338859]
ENSMUSG00000063856	5759.17	0.443999	0.0948812	4.67952	2.87543e-06	3.9725e-05	GPX1	glutathione peroxidase 1 [Source:MGI Symbol;Acc:MGI:104887]
ENSMUSG00000087371	15.569	0.853766	0.182506	4.67801	2.89675e-06	3.99624e-05	GM15541	predicted gene 15541 [Source:MGI Symbol;Acc:MGI:3782989]
ENSMUSG00000025318	221.824	-0.60691	0.129752	-4.67747	2.90434e-06	4.00384e-05	JPH3	junctophilin 3 [Source:MGI Symbol;Acc:MGI:1891497]
ENSMUSG00000050608	883.222	0.459864	0.0983186	4.67728	2.90702e-06	4.00468e-05	MINOS1	mitochondrial inner membrane organizing system 1 [Source:MGI Symbol;Acc:MGI:1913628]
ENSMUSG00000039953	3737.36	-0.414023	0.088522	-4.67706	2.91011e-06	4.00608e-05	CLSTN1	calsyntenin 1 [Source:MGI Symbol;Acc:MGI:1929895]
ENSMUSG00000022582	19.9153	0.685749	0.146663	4.67568	2.92977e-06	4.03025e-05	LY6G	lymphocyte antigen 6 complex, locus G [Source:MGI Symbol;Acc:MGI:109440]
ENSMUSG00000033767	1180.64	-0.326729	0.0699444	-4.67127	2.99347e-06	4.11495e-05	D930015E06RIK	RIKEN cDNA D930015E06 gene [Source:MGI Symbol;Acc:MGI:2443399]
ENSMUSG00000050323	118.469	0.587158	0.125763	4.66877	3.03011e-06	4.16236e-05	NDUFAF6	NADH dehydrogenase (ubiquinone) complex I, assembly factor 6 [Source:MGI Symbol;Acc:MGI:1924197]
ENSMUSG00000010051	205.214	-0.58534	0.125381	-4.6685	3.03405e-06	4.1648e-05	HYAL1	hyaluronoglucosaminidase 1 [Source:MGI Symbol;Acc:MGI:96298]
ENSMUSG00000032911	17.0972	-0.664649	0.142382	-4.66808	3.04031e-06	4.17043e-05	CSPG4	chondroitin sulfate proteoglycan 4 [Source:MGI Symbol;Acc:MGI:2153093]
ENSMUSG00000034343	1078.95	0.233798	0.0500885	4.66769	3.046e-06	4.17526e-05	UBE2F	ubiquitin-conjugating enzyme E2F (putative) [Source:MGI Symbol;Acc:MGI:1915171]
ENSMUSG00000101111	15038.3	0.586104	0.125617	4.66581	3.07399e-06	4.21065e-05	GM28437	predicted gene 28437 [Source:MGI Symbol;Acc:MGI:5579143]
ENSMUSG00000040093	719.425	0.448383	0.0961141	4.66511	3.08454e-06	4.22211e-05	BMF	BCL2 modifying factor [Source:MGI Symbol;Acc:MGI:2176433]
ENSMUSG00000091754	235.39	0.593883	0.127311	4.66483	3.08874e-06	4.22486e-05	GM3636	predicted gene 3636 [Source:MGI Symbol;Acc:MGI:3781812]
ENSMUSG00000054400	640.613	0.50034	0.107291	4.66338	3.1106e-06	4.25174e-05	CKLF	chemokine-like factor [Source:MGI Symbol;Acc:MGI:1922708]
ENSMUSG00000026727	1521.8	-0.27705	0.0594154	-4.66293	3.11741e-06	4.25804e-05	RSU1	Ras suppressor protein 1 [Source:MGI Symbol;Acc:MGI:103040]
ENSMUSG00000035674	798.672	0.407478	0.0873987	4.66229	3.12713e-06	4.26829e-05	NDUFA3	NADH dehydrogenase (ubiquinone) 1 alpha subcomplex, 3 [Source:MGI Symbol;Acc:MGI:1913341]
ENSMUSG00000029814	5.478	0.871244	0.186882	4.66199	3.13161e-06	4.27138e-05	IGF2BP3	insulin-like growth factor 2 mRNA binding protein 3 [Source:MGI Symbol;Acc:MGI:1890359]
ENSMUSG00000018451	12.0047	-0.896305	0.192278	-4.6615	3.13917e-06	4.27866e-05	6330403K07RIK	RIKEN cDNA 6330403K07 gene [Source:MGI Symbol;Acc:MGI:1918001]
ENSMUSG00000041180	46.4187	-0.810159	0.173819	-4.66094	3.14774e-06	4.28733e-05	HECTD2	HECT domain containing 2 [Source:MGI Symbol;Acc:MGI:2442663]
ENSMUSG00000026094	900.522	0.33921	0.0727823	4.66061	3.15272e-06	4.29107e-05	STK17B	serine/threonine kinase 17b (apoptosis-inducing) [Source:MGI Symbol;Acc:MGI:2138162]
ENSMUSG00000033918	469.773	0.340728	0.0731194	4.65988	3.16392e-06	4.30328e-05	PARL	presenilin associated, rhomboid-like [Source:MGI Symbol;Acc:MGI:1277152]
ENSMUSG00000067365	733.489	0.355733	0.0763485	4.65933	3.17235e-06	4.31172e-05	TMEM128	transmembrane protein 128 [Source:MGI Symbol;Acc:MGI:1913559]
ENSMUSG00000051506	789.267	-0.599501	0.128732	-4.65696	3.2092e-06	4.35873e-05	WDFY4	WD repeat and FYVE domain containing 4 [Source:MGI Symbol;Acc:MGI:3584510]
ENSMUSG00000030615	314.941	0.504977	0.108502	4.65409	3.25418e-06	4.41672e-05	TMEM126A	transmembrane protein 126A [Source:MGI Symbol;Acc:MGI:1913521]
ENSMUSG00000026739	976.385	-0.323295	0.0695412	-4.64897	3.33597e-06	4.52136e-05	BMI1	Bmi1 polycomb ring finger oncogene [Source:MGI Symbol;Acc:MGI:88174]
ENSMUSG00000026435	8.92883	-0.822012	0.176842	-4.64829	3.34691e-06	4.52665e-05	SLC45A3	solute carrier family 45, member 3 [Source:MGI Symbol;Acc:MGI:1922082]
ENSMUSG00000038256	247.889	-0.570123	0.122651	-4.64833	3.3464e-06	4.52665e-05	BCL9	B cell CLL/lymphoma 9 [Source:MGI Symbol;Acc:MGI:1924828]
ENSMUSG00000078817	4.11162	0.633583	0.136297	4.64854	3.34296e-06	4.52665e-05	NLRP12	NLR family, pyrin domain containing 12 [Source:MGI Symbol;Acc:MGI:2676630]
ENSMUSG00000040771	567.535	0.306989	0.0660593	4.64718	3.36508e-06	4.54804e-05	OARD1	O-acyl-ADP-ribose deacylase 1 [Source:MGI Symbol;Acc:MGI:2146818]
ENSMUSG00000064856	8.69824	0.748075	0.161088	4.6439	3.41901e-06	4.61125e-05	GM23444	predicted gene, 23444 [Source:MGI Symbol;Acc:MGI:5453221]
ENSMUSG00000094050	8.69824	0.748075	0.161088	4.6439	3.41901e-06	4.61125e-05	GM23472	predicted gene, 23472 [Source:MGI Symbol;Acc:MGI:5453249]
ENSMUSG00000107000	392.986	0.455304	0.0980409	4.64402	3.41703e-06	4.61125e-05	GM43481	predicted gene 43481 [Source:MGI Symbol;Acc:MGI:5663618]
ENSMUSG00000042508	1586.77	0.287603	0.0619563	4.64203	3.45009e-06	4.64972e-05	DMTF1	cyclin D binding myb-like transcription factor 1 [Source:MGI Symbol;Acc:MGI:1344415]
ENSMUSG00000094377	3.80511	0.814901	0.175554	4.64189	3.45235e-06	4.64972e-05	GM24407	predicted gene, 24407 [Source:MGI Symbol;Acc:MGI:5454184]
ENSMUSG00000060301	492.012	0.362998	0.0782045	4.64165	3.45633e-06	4.65182e-05	2610008E11RIK	RIKEN cDNA 2610008E11 gene [Source:MGI Symbol;Acc:MGI:1919378]
ENSMUSG00000089889	50.5419	0.626901	0.135204	4.63672	3.53976e-06	4.7608e-05	0610040B10RIK	RIKEN cDNA 0610040B10 gene [Source:MGI Symbol;Acc:MGI:1914922]
ENSMUSG00000021432	467.248	0.446106	0.0962195	4.63634	3.54629e-06	4.76565e-05	SLC35B3	solute carrier family 35, member B3 [Source:MGI Symbol;Acc:MGI:1913978]
ENSMUSG00000097574	51.6932	0.737755	0.159128	4.63622	3.54831e-06	4.76565e-05	C920006O11RIK	RIKEN cDNA C920006O11 gene [Source:MGI Symbol;Acc:MGI:2443759]
ENSMUSG00000028165	1245	0.307352	0.0663264	4.63393	3.58785e-06	4.8154e-05	CISD2	CDGSH iron sulfur domain 2 [Source:MGI Symbol;Acc:MGI:1914256]
ENSMUSG00000014498	223.634	0.514137	0.110966	4.63328	3.59918e-06	4.82726e-05	ANKRD52	ankyrin repeat domain 52 [Source:MGI Symbol;Acc:MGI:2444029]
ENSMUSG00000107355	9.05222	0.863877	0.186496	4.63215	3.61895e-06	4.8504e-05	AI839979	expressed sequence AI839979 [Source:MGI Symbol;Acc:MGI:2140975]
ENSMUSG00000025225	526.463	-0.356053	0.076884	-4.63105	3.63823e-06	4.86692e-05	NFKB2	nuclear factor of kappa light polypeptide gene enhancer in B cells 2, p49/p100 [Source:MGI Symbol;Acc:MGI:1099800]
ENSMUSG00000025903	1077.57	0.262856	0.0567581	4.63117	3.63604e-06	4.86692e-05	LYPLA1	lysophospholipase 1 [Source:MGI Symbol;Acc:MGI:1344588]
ENSMUSG00000033253	162.824	-0.674301	0.145606	-4.63101	3.63884e-06	4.86692e-05	SZT2	seizure threshold 2 [Source:MGI Symbol;Acc:MGI:3033336]
ENSMUSG00000017686	1387.09	0.248767	0.0537235	4.63051	3.64763e-06	4.8753e-05	RHOT1	ras homolog family member T1 [Source:MGI Symbol;Acc:MGI:1926078]
ENSMUSG00000031672	806.141	-0.370857	0.0800995	-4.62995	3.65746e-06	4.88505e-05	GOT2	glutamatic-oxaloacetic transaminase 2, mitochondrial [Source:MGI Symbol;Acc:MGI:95792]
ENSMUSG00000021764	453.296	0.50366	0.108802	4.62914	3.67179e-06	4.9008e-05	NDUFS4	NADH dehydrogenase (ubiquinone) Fe-S protein 4 [Source:MGI Symbol;Acc:MGI:1343135]
ENSMUSG00000027523	5539.99	-0.335932	0.0725741	-4.62882	3.67759e-06	4.90515e-05	GNAS	GNAS (guanine nucleotide binding protein, alpha stimulating) complex locus [Source:MGI Symbol;Acc:MGI:95777]
ENSMUSG00000032579	187.286	0.499175	0.107894	4.62652	3.71858e-06	4.95639e-05	HEMK1	HemK methyltransferase family member 1 [Source:MGI Symbol;Acc:MGI:1916786]
ENSMUSG00000005268	4.97395	0.72666	0.157072	4.6263	3.72255e-06	4.95826e-05	PRLR	prolactin receptor [Source:MGI Symbol;Acc:MGI:97763]
ENSMUSG00000018169	2366.96	0.178226	0.0385329	4.62529	3.74067e-06	4.97897e-05	MFNG	MFNG O-fucosylpeptide 3-beta-N-acetylglucosaminyltransferase [Source:MGI Symbol;Acc:MGI:1095404]
ENSMUSG00000015437	10.503	0.622062	0.134497	4.62512	3.7439e-06	4.97983e-05	GZMB	granzyme B [Source:MGI Symbol;Acc:MGI:109267]
ENSMUSG00000064354	7163.99	0.473612	0.102414	4.62449	3.75528e-06	4.99152e-05	MT-CO2	mitochondrially encoded cytochrome c oxidase II [Source:MGI Symbol;Acc:MGI:102503]
ENSMUSG00000027333	2480.84	0.252458	0.0545947	4.62422	3.76003e-06	4.9944e-05	SMOX	spermine oxidase [Source:MGI Symbol;Acc:MGI:2445356]
ENSMUSG00000024764	665.706	-0.267158	0.0577818	-4.62356	3.77211e-06	5.007e-05	NAA40	N(alpha)-acetyltransferase 40, NatD catalytic subunit [Source:MGI Symbol;Acc:MGI:1918249]
ENSMUSG00000090031	162.969	-0.632036	0.136749	-4.62185	3.80331e-06	5.04494e-05	4732440D04RIK	RIKEN cDNA 4732440D04 gene [Source:MGI Symbol;Acc:MGI:3604103]
ENSMUSG00000028398	284.695	0.487753	0.105543	4.62139	3.81186e-06	5.05281e-05	TMEM261	transmembrane protein 261 [Source:MGI Symbol;Acc:MGI:1914178]
ENSMUSG00000012819	1769.08	-0.493653	0.106848	-4.62017	3.83434e-06	5.07564e-05	CDH23	cadherin 23 (otocadherin) [Source:MGI Symbol;Acc:MGI:1890219]
ENSMUSG00000026177	5717.17	-0.237982	0.0515262	-4.61867	3.86213e-06	5.10892e-05	SLC11A1	solute carrier family 11 (proton-coupled divalent metal ion transporters), member 1 [Source:MGI Symbol;Acc:MGI:1345275]
ENSMUSG00000003948	273.899	-0.431107	0.0933901	-4.61619	3.90846e-06	5.16667e-05	MMD	monocyte to macrophage differentiation-associated [Source:MGI Symbol;Acc:MGI:1914718]
ENSMUSG00000071451	136.202	0.669464	0.145056	4.6152	3.92718e-06	5.18786e-05	PSMG4	proteasome (prosome, macropain) assembly chaperone 4 [Source:MGI Symbol;Acc:MGI:1916916]
ENSMUSG00000017778	1123.1	0.482977	0.104659	4.61476	3.93544e-06	5.19521e-05	COX7C	cytochrome c oxidase subunit VIIc [Source:MGI Symbol;Acc:MGI:103226]
ENSMUSG00000047613	402.822	0.415961	0.0901823	4.61245	3.97957e-06	5.24629e-05	A430005L14RIK	RIKEN cDNA A430005L14 gene [Source:MGI Symbol;Acc:MGI:2140680]
ENSMUSG00000062619	122.64	0.578037	0.125366	4.61081	4.01109e-06	5.28424e-05	2310039H08RIK	RIKEN cDNA 2310039H08 gene [Source:MGI Symbol;Acc:MGI:1914351]
ENSMUSG00000030469	581.855	0.468349	0.101672	4.60647	4.09562e-06	5.39192e-05	ZFP719	zinc finger protein 719 [Source:MGI Symbol;Acc:MGI:2444708]
ENSMUSG00000050822	5.67664	0.689008	0.149663	4.60374	4.14969e-06	5.45937e-05	SLC29A4	solute carrier family 29 (nucleoside transporters), member 4 [Source:MGI Symbol;Acc:MGI:2385330]
ENSMUSG00000039637	943.994	-0.260649	0.056619	-4.60356	4.15332e-06	5.46043e-05	CORO7	coronin 7 [Source:MGI Symbol;Acc:MGI:1926135]
ENSMUSG00000043085	23.5903	-0.878325	0.190889	-4.60123	4.20006e-06	5.51812e-05	TMEM82	transmembrane protein 82 [Source:MGI Symbol;Acc:MGI:2384869]
ENSMUSG00000052911	389.651	-0.531965	0.11567	-4.59899	4.24538e-06	5.57387e-05	LAMB2	laminin, beta 2 [Source:MGI Symbol;Acc:MGI:99916]
ENSMUSG00000040229	49748.9	0.37131	0.0807923	4.59586	4.30977e-06	5.65071e-05	GPR34	G protein-coupled receptor 34 [Source:MGI Symbol;Acc:MGI:1346334]
ENSMUSG00000006235	52.4006	0.753574	0.163995	4.5951	4.32532e-06	5.66726e-05	EPOR	erythropoietin receptor [Source:MGI Symbol;Acc:MGI:95408]
ENSMUSG00000038400	6035.66	-0.418909	0.0912108	-4.59276	4.37424e-06	5.72746e-05	PMEPA1	prostate transmembrane protein, androgen induced 1 [Source:MGI Symbol;Acc:MGI:1929600]
ENSMUSG00000022673	274.756	-0.485905	0.10583	-4.59136	4.40361e-06	5.76202e-05	MCM4	minichromosome maintenance complex component 4 [Source:MGI Symbol;Acc:MGI:103199]
ENSMUSG00000070953	150.186	0.493645	0.107623	4.58681	4.50079e-06	5.88518e-05	RABEPK	Rab9 effector protein with kelch motifs [Source:MGI Symbol;Acc:MGI:2139530]
ENSMUSG00000032177	281.723	-0.359437	0.0783699	-4.58642	4.50914e-06	5.8921e-05	PDE4A	phosphodiesterase 4A, cAMP specific [Source:MGI Symbol;Acc:MGI:99558]
ENSMUSG00000021384	5693.82	0.356148	0.0776588	4.58606	4.51692e-06	5.89828e-05	SUSD3	sushi domain containing 3 [Source:MGI Symbol;Acc:MGI:1913579]
ENSMUSG00000051730	351.877	0.402626	0.0878035	4.58554	4.52823e-06	5.90904e-05	METTL5	methyltransferase like 5 [Source:MGI Symbol;Acc:MGI:1922672]
ENSMUSG00000022774	477.808	-0.310424	0.0677078	-4.58475	4.54529e-06	5.9273e-05	NCBP2	nuclear cap binding protein subunit 2 [Source:MGI Symbol;Acc:MGI:1915342]
ENSMUSG00000024601	705.675	-0.262719	0.0573222	-4.5832	4.57906e-06	5.96731e-05	ISOC1	isochorismatase domain containing 1 [Source:MGI Symbol;Acc:MGI:1913557]
ENSMUSG00000021884	155.519	0.466422	0.101802	4.58168	4.61254e-06	6.00689e-05	HACL1	2-hydroxyacyl-CoA lyase 1 [Source:MGI Symbol;Acc:MGI:1929657]
ENSMUSG00000014301	199.029	0.454543	0.0992183	4.58124	4.62228e-06	6.01551e-05	PAM16	presequence translocase-asssociated motor 16 homolog (S. cerevisiae) [Source:MGI Symbol;Acc:MGI:1913699]
ENSMUSG00000063049	155.002	0.437541	0.0955431	4.57951	4.66061e-06	6.0613e-05	ING2	inhibitor of growth family, member 2 [Source:MGI Symbol;Acc:MGI:1916510]
ENSMUSG00000060419	87.8426	0.598206	0.130638	4.57911	4.66958e-06	6.06888e-05	RPS16-PS2	ribosomal protein S16, pseudogene 2 [Source:MGI Symbol;Acc:MGI:3704259]
ENSMUSG00000034707	16968.1	-0.374107	0.0817063	-4.57868	4.6792e-06	6.07729e-05	GNS	glucosamine (N-acetyl)-6-sulfatase [Source:MGI Symbol;Acc:MGI:1922862]
ENSMUSG00000033386	1457.79	-0.276516	0.0604022	-4.57792	4.69627e-06	6.09535e-05	FRRS1	ferric-chelate reductase 1 [Source:MGI Symbol;Acc:MGI:108076]
ENSMUSG00000040174	490.021	0.365276	0.0798162	4.57647	4.72889e-06	6.13358e-05	ALKBH3	alkB homolog 3, alpha-ketoglutarate-dependent dioxygenase [Source:MGI Symbol;Acc:MGI:1916363]
ENSMUSG00000020644	448.444	0.489256	0.106919	4.57596	4.74049e-06	6.14036e-05	ID2	inhibitor of DNA binding 2 [Source:MGI Symbol;Acc:MGI:96397]
ENSMUSG00000096719	7.60604	0.702559	0.153531	4.57602	4.73908e-06	6.14036e-05	MRGPRA2B	MAS-related GPR, member A2B [Source:MGI Symbol;Acc:MGI:3033098]
ENSMUSG00000021876	17167.6	0.342224	0.074843	4.57256	4.81809e-06	6.23251e-05	RNASE4	ribonuclease, RNase A family 4 [Source:MGI Symbol;Acc:MGI:1926217]
ENSMUSG00000061981	355.639	-0.459992	0.100596	-4.57267	4.81544e-06	6.23251e-05	FLOT2	flotillin 2 [Source:MGI Symbol;Acc:MGI:103309]
ENSMUSG00000031389	3062.02	0.366137	0.0801258	4.56953	4.88828e-06	6.31581e-05	ARHGAP4	Rho GTPase activating protein 4 [Source:MGI Symbol;Acc:MGI:2159577]
ENSMUSG00000031758	170.879	-0.522462	0.114337	-4.56949	4.88903e-06	6.31581e-05	CDYL2	chromodomain protein, Y chromosome-like 2 [Source:MGI Symbol;Acc:MGI:1923046]
ENSMUSG00000073838	517.272	-0.404952	0.0886545	-4.56775	4.92985e-06	6.36428e-05	TUFM	Tu translation elongation factor, mitochondrial [Source:MGI Symbol;Acc:MGI:1923686]
ENSMUSG00000039783	7.35479	0.811628	0.177762	4.56581	4.97559e-06	6.41475e-05	KMO	kynurenine 3-monooxygenase (kynurenine 3-hydroxylase) [Source:MGI Symbol;Acc:MGI:2138151]
ENSMUSG00000104453	23.6018	-0.823153	0.180281	-4.56595	4.9724e-06	6.41475e-05	GM37829	predicted gene, 37829 [Source:MGI Symbol;Acc:MGI:5611057]
ENSMUSG00000068856	1103.49	-0.372068	0.0815697	-4.56135	5.08255e-06	6.54828e-05	SF3B4	splicing factor 3b, subunit 4 [Source:MGI Symbol;Acc:MGI:109580]
ENSMUSG00000024737	448.483	-0.521458	0.114342	-4.5605	5.10312e-06	6.5704e-05	SLC15A3	solute carrier family 15, member 3 [Source:MGI Symbol;Acc:MGI:1929691]
ENSMUSG00000070394	573.375	0.571382	0.125315	4.55955	5.12626e-06	6.59579e-05	TMEM256	transmembrane protein 256 [Source:MGI Symbol;Acc:MGI:1916436]
ENSMUSG00000045094	3.29149	0.664133	0.145694	4.55842	5.15389e-06	6.62692e-05	ARHGEF37	Rho guanine nucleotide exchange factor (GEF) 37 [Source:MGI Symbol;Acc:MGI:3045339]
ENSMUSG00000046718	1068.99	-0.359392	0.0788492	-4.55797	5.16513e-06	6.63695e-05	BST2	bone marrow stromal cell antigen 2 [Source:MGI Symbol;Acc:MGI:1916800]
ENSMUSG00000023150	34517.4	0.38355	0.084153	4.55777	5.17004e-06	6.63862e-05	IVNS1ABP	influenza virus NS1A binding protein [Source:MGI Symbol;Acc:MGI:2152389]
ENSMUSG00000087366	12.2891	0.866776	0.190181	4.55763	5.17331e-06	6.63862e-05	JUNOS	jun proto-oncogene, opposite strand [Source:MGI Symbol;Acc:MGI:2652837]
ENSMUSG00000038722	614.04	0.466568	0.102378	4.55731	5.18137e-06	6.64454e-05	BUD31	BUD31 homolog [Source:MGI Symbol;Acc:MGI:2141291]
ENSMUSG00000032812	3165	-0.37309	0.0818973	-4.55558	5.22418e-06	6.695e-05	ARAP1	ArfGAP with RhoGAP domain, ankyrin repeat and PH domain 1 [Source:MGI Symbol;Acc:MGI:1916960]
ENSMUSG00000025630	1806.29	0.409977	0.0900071	4.55494	5.24011e-06	6.71096e-05	HPRT	hypoxanthine guanine phosphoribosyl transferase [Source:MGI Symbol;Acc:MGI:96217]
ENSMUSG00000085704	110.119	0.690313	0.151631	4.55259	5.299e-06	6.78188e-05	4921531C22RIK	RIKEN cDNA 4921531C22 gene [Source:MGI Symbol;Acc:MGI:1913980]
ENSMUSG00000046432	102.469	-0.562702	0.123611	-4.5522	5.30866e-06	6.78974e-05	BEX3	brain expressed X-linked 3 [Source:MGI Symbol;Acc:MGI:1338016]
ENSMUSG00000019179	1527.83	-0.269081	0.0591207	-4.55138	5.32959e-06	6.81199e-05	MDH2	malate dehydrogenase 2, NAD (mitochondrial) [Source:MGI Symbol;Acc:MGI:97050]
ENSMUSG00000021003	627.378	-0.399565	0.087818	-4.54992	5.36653e-06	6.85467e-05	GALC	galactosylceramidase [Source:MGI Symbol;Acc:MGI:95636]
ENSMUSG00000022496	264.04	0.41097	0.0903876	4.54675	5.44813e-06	6.9543e-05	TNFRSF17	tumor necrosis factor receptor superfamily, member 17 [Source:MGI Symbol;Acc:MGI:1343050]
ENSMUSG00000024993	1197.62	0.319514	0.0702941	4.54539	5.48332e-06	6.99458e-05	FAM45A	family with sequence similarity 45, member A [Source:MGI Symbol;Acc:MGI:1915144]
ENSMUSG00000062729	2024	0.348152	0.0766229	4.5437	5.52751e-06	7.0463e-05	PPOX	protoporphyrinogen oxidase [Source:MGI Symbol;Acc:MGI:104968]
ENSMUSG00000066800	112.515	0.882322	0.194268	4.54179	5.57795e-06	7.1059e-05	RNASEL	ribonuclease L (2', 5'-oligoisoadenylate synthetase-dependent) [Source:MGI Symbol;Acc:MGI:1098272]
ENSMUSG00000103364	69.011	0.733801	0.161689	4.53836	5.66944e-06	7.21769e-05	GM38157	predicted gene, 38157 [Source:MGI Symbol;Acc:MGI:5611385]
ENSMUSG00000016024	9.07696	0.702635	0.154874	4.53683	5.71058e-06	7.26528e-05	LBP	lipopolysaccharide binding protein [Source:MGI Symbol;Acc:MGI:1098776]
ENSMUSG00000005410	171.936	-0.509543	0.112323	-4.5364	5.72215e-06	7.2752e-05	MCM5	minichromosome maintenance complex component 5 [Source:MGI Symbol;Acc:MGI:103197]
ENSMUSG00000024583	754.742	0.242507	0.0535182	4.5313	5.8623e-06	7.44848e-05	TXNL1	thioredoxin-like 1 [Source:MGI Symbol;Acc:MGI:1860078]
ENSMUSG00000045326	23.6472	0.869365	0.191884	4.53068	5.87928e-06	7.46514e-05	FNDC7	fibronectin type III domain containing 7 [Source:MGI Symbol;Acc:MGI:2443535]
ENSMUSG00000026728	78.7731	0.788259	0.174054	4.52883	5.93106e-06	7.521e-05	VIM	vimentin [Source:MGI Symbol;Acc:MGI:98932]
ENSMUSG00000006731	806.663	-0.294663	0.0650872	-4.5272	5.97709e-06	7.57438e-05	B4GALNT1	beta-1,4-N-acetyl-galactosaminyl transferase 1 [Source:MGI Symbol;Acc:MGI:1342057]
ENSMUSG00000097418	3.89509	-0.707544	0.156321	-4.52622	6.00475e-06	7.60444e-05	MIR155HG	Mir155 host gene (non-protein coding) [Source:MGI Symbol;Acc:MGI:5477161]
ENSMUSG00000097798	32.9457	0.754007	0.166607	4.52565	6.02098e-06	7.62e-05	GM26898	predicted gene, 26898 [Source:MGI Symbol;Acc:MGI:5477392]
ENSMUSG00000068823	3351.2	0.223234	0.0493362	4.52475	6.04669e-06	7.64751e-05	CSDE1	cold shock domain containing E1, RNA binding [Source:MGI Symbol;Acc:MGI:92356]
ENSMUSG00000063522	22.417	0.838237	0.185264	4.52455	6.05246e-06	7.64981e-05	2010109I03RIK	RIKEN cDNA 2010109I03 gene [Source:MGI Symbol;Acc:MGI:1914288]
ENSMUSG00000039221	215.038	0.509268	0.112569	4.52404	6.06713e-06	7.66332e-05	RPL22L1	ribosomal protein L22 like 1 [Source:MGI Symbol;Acc:MGI:1915278]
ENSMUSG00000026426	1496.55	-0.36841	0.0814639	-4.52237	6.11516e-06	7.71894e-05	ARL8A	ADP-ribosylation factor-like 8A [Source:MGI Symbol;Acc:MGI:1915974]
ENSMUSG00000002265	13.0281	-0.846478	0.187199	-4.5218	6.13166e-06	7.73471e-05	PEG3	paternally expressed 3 [Source:MGI Symbol;Acc:MGI:104748]
ENSMUSG00000035686	1022.89	-0.301459	0.0666829	-4.52079	6.1608e-06	7.76639e-05	THRSP	thyroid hormone responsive [Source:MGI Symbol;Acc:MGI:109126]
ENSMUSG00000085184	50.9207	-0.731848	0.161926	-4.51963	6.19471e-06	7.80405e-05	4933439K11RIK	RIKEN cDNA 4933439K11 gene [Source:MGI Symbol;Acc:MGI:1918569]
ENSMUSG00000034121	255.941	0.390217	0.0863658	4.51819	6.23694e-06	7.85212e-05	MKS1	Meckel syndrome, type 1 [Source:MGI Symbol;Acc:MGI:3584243]
ENSMUSG00000024308	7449.93	-0.332579	0.073614	-4.51788	6.24613e-06	7.85856e-05	TAPBP	TAP binding protein [Source:MGI Symbol;Acc:MGI:1201689]
ENSMUSG00000066191	361.395	0.420994	0.0932073	4.51674	6.27976e-06	7.89217e-05	ANKS6	ankyrin repeat and sterile alpha motif domain containing 6 [Source:MGI Symbol;Acc:MGI:1922941]
ENSMUSG00000095195	72.0298	0.849227	0.188019	4.5167	6.28102e-06	7.89217e-05	GM3005	predicted gene 3005 [Source:MGI Symbol;Acc:MGI:3781183]
ENSMUSG00000064181	427.769	0.294198	0.0651811	4.51355	6.37527e-06	8.00538e-05	RAB3IP	RAB3A interacting protein [Source:MGI Symbol;Acc:MGI:105933]
ENSMUSG00000062593	313.638	-0.633648	0.140398	-4.51323	6.38478e-06	8.01212e-05	LILRB4A	leukocyte immunoglobulin-like receptor, subfamily B, member 4A [Source:MGI Symbol;Acc:MGI:102701]
ENSMUSG00000000486	6.36052	0.844326	0.187084	4.51308	6.38923e-06	8.01249e-05	2017-09-01	septin 1 [Source:MGI Symbol;Acc:MGI:1858916]
ENSMUSG00000036986	321.684	-0.492158	0.109074	-4.51214	6.41761e-06	8.04285e-05	PML	promyelocytic leukemia [Source:MGI Symbol;Acc:MGI:104662]
ENSMUSG00000102051	25.9234	0.672717	0.149211	4.50849	6.52922e-06	8.17741e-05	I830127L07RIK	RIKEN cDNA I830127L07 gene [Source:MGI Symbol;Acc:MGI:3612406]
ENSMUSG00000003421	772.011	-0.286398	0.0635284	-4.50818	6.53849e-06	8.18372e-05	NOSIP	nitric oxide synthase interacting protein [Source:MGI Symbol;Acc:MGI:1913644]
ENSMUSG00000038332	3177.64	0.295517	0.0655552	4.50791	6.54705e-06	8.18911e-05	SESN1	sestrin 1 [Source:MGI Symbol;Acc:MGI:2155278]
ENSMUSG00000025017	3469.11	-0.341628	0.0758171	-4.50595	6.60775e-06	8.25434e-05	PIK3AP1	phosphoinositide-3-kinase adaptor protein 1 [Source:MGI Symbol;Acc:MGI:1933177]
ENSMUSG00000042444	1763.89	-0.270007	0.0599208	-4.50607	6.60393e-06	8.25434e-05	FAM63B	family with sequence similarity 63, member B [Source:MGI Symbol;Acc:MGI:2443086]
ENSMUSG00000015961	466.27	0.263836	0.0585641	4.50509	6.63464e-06	8.28257e-05	ADSS	adenylosuccinate synthetase, non muscle [Source:MGI Symbol;Acc:MGI:87948]
ENSMUSG00000024812	370.521	-0.521744	0.115821	-4.50476	6.64485e-06	8.28996e-05	TJP2	tight junction protein 2 [Source:MGI Symbol;Acc:MGI:1341872]
ENSMUSG00000071337	1529.84	0.417931	0.092833	4.50197	6.7327e-06	8.39413e-05	TIA1	cytotoxic granule-associated RNA binding protein 1 [Source:MGI Symbol;Acc:MGI:107914]
ENSMUSG00000022400	1535.47	0.371418	0.0825139	4.50128	6.75454e-06	8.41592e-05	RBX1	ring-box 1 [Source:MGI Symbol;Acc:MGI:1891829]
ENSMUSG00000103883	17.0195	-0.84085	0.186809	-4.50112	6.7597e-06	8.41691e-05	GM37010	predicted gene, 37010 [Source:MGI Symbol;Acc:MGI:5610238]
ENSMUSG00000036751	1355.05	0.439103	0.0975698	4.5004	6.78247e-06	8.43983e-05	COX6B1	cytochrome c oxidase, subunit VIb polypeptide 1 [Source:MGI Symbol;Acc:MGI:107460]
ENSMUSG00000041870	2758.63	-0.337738	0.0750991	-4.49723	6.88441e-06	8.56116e-05	ANKRD13A	ankyrin repeat domain 13a [Source:MGI Symbol;Acc:MGI:1915670]
ENSMUSG00000026712	549.569	0.611544	0.136017	4.49607	6.92218e-06	8.60258e-05	MRC1	mannose receptor, C type 1 [Source:MGI Symbol;Acc:MGI:97142]
ENSMUSG00000028367	415.675	0.40154	0.08933	4.49502	6.95628e-06	8.63939e-05	TXN1	thioredoxin 1 [Source:MGI Symbol;Acc:MGI:98874]
ENSMUSG00000079547	2648.9	-0.27393	0.0609449	-4.49472	6.96616e-06	8.64611e-05	H2-DMB1	histocompatibility 2, class II, locus Mb1 [Source:MGI Symbol;Acc:MGI:95922]
ENSMUSG00000041515	9617.99	-0.228437	0.0508434	-4.49294	7.02451e-06	8.70733e-05	IRF8	interferon regulatory factor 8 [Source:MGI Symbol;Acc:MGI:96395]
ENSMUSG00000027200	276.569	0.672985	0.149807	4.49233	7.04467e-06	8.72671e-05	SEMA6D	sema domain, transmembrane domain (TM), and cytoplasmic domain, (semaphorin) 6D [Source:MGI Symbol;Acc:MGI:2387661]
ENSMUSG00000029616	3078.78	0.247766	0.0551666	4.49123	7.08143e-06	8.75539e-05	ERP29	endoplasmic reticulum protein 29 [Source:MGI Symbol;Acc:MGI:1914647]
ENSMUSG00000034118	274.199	-0.542807	0.120854	-4.49143	7.0747e-06	8.75539e-05	TPST1	protein-tyrosine sulfotransferase 1 [Source:MGI Symbol;Acc:MGI:1298231]
ENSMUSG00000037235	659.427	0.305097	0.0679304	4.49131	7.07861e-06	8.75539e-05	MXD4	Max dimerization protein 4 [Source:MGI Symbol;Acc:MGI:104991]
ENSMUSG00000044894	624.962	0.468606	0.104348	4.49079	7.09579e-06	8.76752e-05	UQCRQ	ubiquinol-cytochrome c reductase, complex III subunit VII [Source:MGI Symbol;Acc:MGI:107807]
ENSMUSG00000024730	2.66678	0.636604	0.141795	4.48961	7.13536e-06	8.81078e-05	MS4A8A	membrane-spanning 4-domains, subfamily A, member 8A [Source:MGI Symbol;Acc:MGI:1927657]
ENSMUSG00000034891	6.32144	-0.85517	0.190491	-4.4893	7.14582e-06	8.81805e-05	SNCB	synuclein, beta [Source:MGI Symbol;Acc:MGI:1889011]
ENSMUSG00000042659	412.877	0.433396	0.0965442	4.48909	7.1527e-06	8.8209e-05	ARRDC4	arrestin domain containing 4 [Source:MGI Symbol;Acc:MGI:1913662]
ENSMUSG00000021701	38.3641	-0.859564	0.191508	-4.48841	7.17581e-06	8.83247e-05	PLK2	polo-like kinase 2 [Source:MGI Symbol;Acc:MGI:1099790]
ENSMUSG00000040659	10942	-0.259809	0.0578818	-4.48861	7.169e-06	8.83247e-05	EFHD2	EF hand domain containing 2 [Source:MGI Symbol;Acc:MGI:106504]
ENSMUSG00000074063	99.3458	-0.677081	0.150847	-4.48854	7.17124e-06	8.83247e-05	OSGIN1	oxidative stress induced growth inhibitor 1 [Source:MGI Symbol;Acc:MGI:1919089]
ENSMUSG00000020459	299.038	0.336721	0.0750333	4.48762	7.20245e-06	8.85962e-05	MTIF2	mitochondrial translational initiation factor 2 [Source:MGI Symbol;Acc:MGI:1924034]
ENSMUSG00000022339	267.891	0.427254	0.095235	4.48631	7.24663e-06	8.90828e-05	EBAG9	estrogen receptor-binding fragment-associated gene 9 [Source:MGI Symbol;Acc:MGI:1859920]
ENSMUSG00000031068	743.499	0.405993	0.0905911	4.48159	7.40882e-06	9.10186e-05	GLRX3	glutaredoxin 3 [Source:MGI Symbol;Acc:MGI:1353653]
ENSMUSG00000024033	2.49423	0.682438	0.152303	4.48079	7.43673e-06	9.1289e-05	RSPH1	radial spoke head 1 homolog (Chlamydomonas) [Source:MGI Symbol;Acc:MGI:1194909]
ENSMUSG00000040451	735.855	0.338891	0.0756336	4.48069	7.44029e-06	9.1289e-05	SGMS1	sphingomyelin synthase 1 [Source:MGI Symbol;Acc:MGI:2444110]
ENSMUSG00000026073	16.0621	0.847299	0.18913	4.47999	7.46462e-06	9.15293e-05	IL1R2	interleukin 1 receptor, type II [Source:MGI Symbol;Acc:MGI:96546]
ENSMUSG00000078919	572.607	0.266891	0.0595792	4.47961	7.47801e-06	9.16353e-05	DPM1	dolichol-phosphate (beta-D) mannosyltransferase 1 [Source:MGI Symbol;Acc:MGI:1330239]
ENSMUSG00000023132	22.2104	0.589109	0.131524	4.4791	7.49569e-06	9.17936e-05	GZMA	granzyme A [Source:MGI Symbol;Acc:MGI:109266]
ENSMUSG00000046806	353.653	0.408458	0.0912018	4.47862	7.51273e-06	9.18647e-05	3110062M04RIK	RIKEN cDNA 3110062M04 gene [Source:MGI Symbol;Acc:MGI:1925662]
ENSMUSG00000105145	27.4787	0.770769	0.172103	4.47853	7.51577e-06	9.18647e-05	AC157822.1	N/A
ENSMUSG00000019590	6.14136	0.70005	0.156441	4.47485	7.64654e-06	9.33449e-05	CYB561	cytochrome b-561 [Source:MGI Symbol;Acc:MGI:103253]
ENSMUSG00000039328	232.533	-0.428765	0.0958376	-4.47387	7.68159e-06	9.37135e-05	RNF122	ring finger protein 122 [Source:MGI Symbol;Acc:MGI:1916117]
ENSMUSG00000002496	863.556	-0.377803	0.0844799	-4.4721	7.74545e-06	9.44328e-05	TSC2	tuberous sclerosis 2 [Source:MGI Symbol;Acc:MGI:102548]
ENSMUSG00000104986	6.4094	-0.842808	0.188504	-4.47103	7.78433e-06	9.48469e-05	1600023N17RIK	RIKEN cDNA 1600023N17 gene [Source:MGI Symbol;Acc:MGI:1917038]
ENSMUSG00000042737	243.815	0.513121	0.114785	4.47029	7.81131e-06	9.51156e-05	DPM3	dolichyl-phosphate mannosyltransferase polypeptide 3 [Source:MGI Symbol;Acc:MGI:1915813]
ENSMUSG00000040139	129.797	0.582358	0.130355	4.4675	7.91407e-06	9.63062e-05	9430038I01RIK	RIKEN cDNA 9430038I01 gene [Source:MGI Symbol;Acc:MGI:1924502]
ENSMUSG00000094825	32.4183	0.738868	0.165478	4.46505	8.00489e-06	9.735e-05	GM3194	predicted gene 3194 [Source:MGI Symbol;Acc:MGI:3781373]
ENSMUSG00000072893	470.235	0.520489	0.116591	4.46423	8.03562e-06	9.76621e-05	4933439C10RIK	RIKEN cDNA 4933439C10 gene [Source:MGI Symbol;Acc:MGI:1921726]
ENSMUSG00000062785	3.61606	-0.799839	0.179185	-4.46375	8.05381e-06	9.78216e-05	KCNC3	potassium voltage gated channel, Shaw-related subfamily, member 3 [Source:MGI Symbol;Acc:MGI:96669]
ENSMUSG00000031377	6.23603	0.664847	0.148952	4.46349	8.06339e-06	9.78764e-05	BMX	BMX non-receptor tyrosine kinase [Source:MGI Symbol;Acc:MGI:1101778]
ENSMUSG00000006301	1257.84	-0.230062	0.0515666	-4.46145	8.14081e-06	9.8754e-05	TMBIM1	transmembrane BAX inhibitor motif containing 1 [Source:MGI Symbol;Acc:MGI:1916910]
ENSMUSG00000028439	130.641	-0.456986	0.102439	-4.46107	8.15529e-06	9.88346e-05	FAM219A	family with sequence similarity 219, member A [Source:MGI Symbol;Acc:MGI:1919151]
ENSMUSG00000056055	20.9265	0.770019	0.172642	4.46022	8.1876e-06	9.91346e-05	SAG	S-antigen, retina and pineal gland (arrestin) [Source:MGI Symbol;Acc:MGI:98227]
ENSMUSG00000056220	1289.51	0.226493	0.0507951	4.45895	8.23636e-06	9.96625e-05	PLA2G4A	phospholipase A2, group IVA (cytosolic, calcium-dependent) [Source:MGI Symbol;Acc:MGI:1195256]
ENSMUSG00000062352	394.964	0.518393	0.116273	4.45842	8.2565e-06	9.98437e-05	ITGB1BP1	integrin beta 1 binding protein 1 [Source:MGI Symbol;Acc:MGI:1306802]
ENSMUSG00000055531	1621.72	-0.250888	0.0563083	-4.45562	8.36528e-06	0.000101096	CPSF6	cleavage and polyadenylation specific factor 6 [Source:MGI Symbol;Acc:MGI:1913948]
ENSMUSG00000032330	745.311	0.472833	0.106143	4.45468	8.40195e-06	0.000101475	COX7A2	cytochrome c oxidase subunit VIIa 2 [Source:MGI Symbol;Acc:MGI:1316715]
ENSMUSG00000028969	468.89	0.342193	0.0768358	4.45356	8.44581e-06	0.000101941	CDK5	cyclin-dependent kinase 5 [Source:MGI Symbol;Acc:MGI:101765]
ENSMUSG00000025163	4.32574	0.590469	0.132636	4.45179	8.51593e-06	0.000102723	CD7	CD7 antigen [Source:MGI Symbol;Acc:MGI:88344]
ENSMUSG00000036036	15.4642	0.866204	0.194592	4.45139	8.53158e-06	0.000102848	ZFP57	zinc finger protein 57 [Source:MGI Symbol;Acc:MGI:99204]
ENSMUSG00000056071	1978.91	0.634273	0.1425	4.45105	8.5453e-06	0.000102949	S100A9	S100 calcium binding protein A9 (calgranulin B) [Source:MGI Symbol;Acc:MGI:1338947]
ENSMUSG00000020432	7947.75	-0.307553	0.0691168	-4.44976	8.59652e-06	0.000103501	TCN2	transcobalamin 2 [Source:MGI Symbol;Acc:MGI:98534]
ENSMUSG00000056692	238.286	-0.457818	0.102905	-4.44893	8.63004e-06	0.00010384	D17WSU92E	DNA segment, Chr 17, Wayne State University 92, expressed [Source:MGI Symbol;Acc:MGI:106281]
ENSMUSG00000015839	3563.8	-0.319656	0.0718777	-4.44722	8.69894e-06	0.000104553	NFE2L2	nuclear factor, erythroid derived 2, like 2 [Source:MGI Symbol;Acc:MGI:108420]
ENSMUSG00000031227	187.198	-0.453501	0.101975	-4.44719	8.70014e-06	0.000104553	MAGEE1	melanoma antigen, family E, 1 [Source:MGI Symbol;Acc:MGI:2148149]
ENSMUSG00000029073	240.71	-0.35527	0.0798968	-4.4466	8.72381e-06	0.000104773	CPTP	ceramide-1-phosphate transfer protein [Source:MGI Symbol;Acc:MGI:1933107]
ENSMUSG00000038615	1063.09	-0.465635	0.104758	-4.44488	8.79429e-06	0.000105553	NFE2L1	nuclear factor, erythroid derived 2,-like 1 [Source:MGI Symbol;Acc:MGI:99421]
ENSMUSG00000030560	15875	-0.242148	0.0544817	-4.44458	8.80652e-06	0.000105634	CTSC	cathepsin C [Source:MGI Symbol;Acc:MGI:109553]
ENSMUSG00000025534	5384.21	-0.192794	0.043379	-4.4444	8.81373e-06	0.000105655	GUSB	glucuronidase, beta [Source:MGI Symbol;Acc:MGI:95872]
ENSMUSG00000029452	41.2655	0.64037	0.144092	4.44418	8.82289e-06	0.000105699	TMEM116	transmembrane protein 116 [Source:MGI Symbol;Acc:MGI:1924712]
ENSMUSG00000039230	548.955	-0.31009	0.0697834	-4.44361	8.84634e-06	0.000105915	TBCD	tubulin-specific chaperone d [Source:MGI Symbol;Acc:MGI:1919686]
ENSMUSG00000058355	1215.75	0.250027	0.0562812	4.44246	8.89364e-06	0.000106415	ABCE1	ATP-binding cassette, sub-family E (OABP), member 1 [Source:MGI Symbol;Acc:MGI:1195458]
ENSMUSG00000020658	12.8567	-0.814833	0.183468	-4.44128	8.9427e-06	0.000106936	EFR3B	EFR3 homolog B [Source:MGI Symbol;Acc:MGI:2444851]
ENSMUSG00000024121	6899.66	-0.303927	0.0684618	-4.43937	9.02246e-06	0.000107823	ATP6V0C	ATPase, H+ transporting, lysosomal V0 subunit C [Source:MGI Symbol;Acc:MGI:88116]
ENSMUSG00000048965	257.475	-0.536941	0.120981	-4.43823	9.07e-06	0.000108257	MRGPRE	MAS-related GPR, member E [Source:MGI Symbol;Acc:MGI:2441884]
ENSMUSG00000026944	657.518	-0.555793	0.12525	-4.43748	9.1019e-06	0.00010857	ABCA2	ATP-binding cassette, sub-family A (ABC1), member 2 [Source:MGI Symbol;Acc:MGI:99606]
ENSMUSG00000020415	592.528	-0.284596	0.0641402	-4.4371	9.11789e-06	0.000108694	PTTG1	pituitary tumor-transforming gene 1 [Source:MGI Symbol;Acc:MGI:1353578]
ENSMUSG00000026095	514.014	0.30415	0.0685526	4.43674	9.1331e-06	0.000108808	ASNSD1	asparagine synthetase domain containing 1 [Source:MGI Symbol;Acc:MGI:1917646]
ENSMUSG00000048495	180.506	0.52574	0.118509	4.43627	9.15302e-06	0.000108978	TYW5	tRNA-yW synthesizing protein 5 [Source:MGI Symbol;Acc:MGI:1915986]
ENSMUSG00000038622	322.933	0.415848	0.0937516	4.43564	9.17997e-06	0.000109232	MED30	mediator complex subunit 30 [Source:MGI Symbol;Acc:MGI:1917040]
ENSMUSG00000034673	347.884	0.356448	0.0803685	4.43517	9.19989e-06	0.000109401	PBX2	pre B cell leukemia homeobox 2 [Source:MGI Symbol;Acc:MGI:1341793]
ENSMUSG00000012422	1021.45	0.310868	0.0701128	4.43382	9.25764e-06	0.00011002	TMEM167	transmembrane protein 167 [Source:MGI Symbol;Acc:MGI:1913324]
ENSMUSG00000031399	1306.94	-0.263832	0.0595421	-4.43101	9.37944e-06	0.000111399	FAM3A	family with sequence similarity 3, member A [Source:MGI Symbol;Acc:MGI:1913544]
ENSMUSG00000024334	581.504	-0.393665	0.0888657	-4.42989	9.42812e-06	0.000111908	H2-OA	histocompatibility 2, O region alpha locus [Source:MGI Symbol;Acc:MGI:95924]
ENSMUSG00000031246	194.672	0.626258	0.14138	4.4296	9.44083e-06	0.00011199	SH3BGRL	SH3-binding domain glutamic acid-rich protein like [Source:MGI Symbol;Acc:MGI:1930849]
ENSMUSG00000090939	94.3955	0.54667	0.123442	4.42857	9.48619e-06	0.000112459	GM17147	predicted gene 17147 [Source:MGI Symbol;Acc:MGI:4937974]
ENSMUSG00000045414	443.999	-0.37123	0.0838391	-4.42789	9.51613e-06	0.000112745	1190002N15RIK	RIKEN cDNA 1190002N15 gene [Source:MGI Symbol;Acc:MGI:1916111]
ENSMUSG00000032666	48.7783	0.756562	0.170884	4.42735	9.5399e-06	0.000112957	1700025G04RIK	RIKEN cDNA 1700025G04 gene [Source:MGI Symbol;Acc:MGI:1916649]
ENSMUSG00000032249	388.415	-0.558827	0.126309	-4.42427	9.67669e-06	0.000114436	ANP32A	acidic (leucine-rich) nuclear phosphoprotein 32 family, member A [Source:MGI Symbol;Acc:MGI:108447]
ENSMUSG00000034994	2695.33	-0.306252	0.0692202	-4.42432	9.67461e-06	0.000114436	EEF2	eukaryotic translation elongation factor 2 [Source:MGI Symbol;Acc:MGI:95288]
ENSMUSG00000090862	692.892	0.463652	0.104832	4.42279	9.74331e-06	0.000115154	RPS13	ribosomal protein S13 [Source:MGI Symbol;Acc:MGI:1915302]
ENSMUSG00000087217	8.13547	0.856729	0.193718	4.42257	9.7536e-06	0.000115205	GM13209	predicted gene 13209 [Source:MGI Symbol;Acc:MGI:3651228]
ENSMUSG00000044148	973.177	-0.326339	0.0738217	-4.42063	9.8413e-06	0.000116098	1810030O07RIK	RIKEN cDNA 1810030O07 gene [Source:MGI Symbol;Acc:MGI:1916405]
ENSMUSG00000069763	1338.31	-0.264235	0.0597724	-4.42068	9.83889e-06	0.000116098	TMEM100	transmembrane protein 100 [Source:MGI Symbol;Acc:MGI:1915138]
ENSMUSG00000027133	474.373	0.43291	0.0979471	4.41984	9.8776e-06	0.000116455	NOP10	NOP10 ribonucleoprotein [Source:MGI Symbol;Acc:MGI:1913431]
ENSMUSG00000029625	463.894	0.294775	0.0667237	4.41784	9.96914e-06	0.000117463	CPSF4	cleavage and polyadenylation specific factor 4 [Source:MGI Symbol;Acc:MGI:1861602]
ENSMUSG00000028229	312.888	0.485798	0.109997	4.41646	1.0033e-05	0.000118072	RMDN1	regulator of microtubule dynamics 1 [Source:MGI Symbol;Acc:MGI:1913552]
ENSMUSG00000019194	783.702	-0.31617	0.0716118	-4.41505	1.00986e-05	0.00011877	SCN1B	sodium channel, voltage-gated, type I, beta [Source:MGI Symbol;Acc:MGI:98247]
ENSMUSG00000085939	185.085	-0.423025	0.0958317	-4.41425	1.0136e-05	0.000119138	CD63-PS	CD63 antigen, pseudogene [Source:MGI Symbol;Acc:MGI:105972]
ENSMUSG00000091498	195.956	0.524575	0.118907	4.41165	1.02585e-05	0.000120505	MPC1-PS	mitochondrial pyruvate carrier 1, pseudogene [Source:MGI Symbol;Acc:MGI:3781628]
ENSMUSG00000021125	8.06717	0.85411	0.193655	4.41047	1.03149e-05	0.000121093	ARG2	arginase type II [Source:MGI Symbol;Acc:MGI:1330806]
ENSMUSG00000025314	1519.42	-0.485198	0.110052	-4.40882	1.03936e-05	0.000121869	PTPRJ	protein tyrosine phosphatase, receptor type, J [Source:MGI Symbol;Acc:MGI:104574]
ENSMUSG00000043323	2786.96	-0.256408	0.0581568	-4.40892	1.0389e-05	0.000121869	FBRSL1	fibrosin-like 1 [Source:MGI Symbol;Acc:MGI:1920907]
ENSMUSG00000073591	78.6812	-0.789033	0.179006	-4.40786	1.04396e-05	0.000122334	PCDHB22	protocadherin beta 22 [Source:MGI Symbol;Acc:MGI:2136760]
ENSMUSG00000037894	2450.16	0.379208	0.0860635	4.40614	1.05228e-05	0.000123235	H2AFZ	H2A histone family, member Z [Source:MGI Symbol;Acc:MGI:1888388]
ENSMUSG00000026579	10.6225	0.607252	0.137884	4.40409	1.06227e-05	0.000124329	F5	coagulation factor V [Source:MGI Symbol;Acc:MGI:88382]
ENSMUSG00000018381	6760.21	-0.314985	0.0715478	-4.40244	1.0704e-05	0.000125205	ABI3	ABI gene family, member 3 [Source:MGI Symbol;Acc:MGI:1913860]
ENSMUSG00000006273	2460.55	-0.255517	0.0580536	-4.4014	1.07553e-05	0.000125728	ATP6V1B2	ATPase, H+ transporting, lysosomal V1 subunit B2 [Source:MGI Symbol;Acc:MGI:109618]
ENSMUSG00000069899	1460.82	0.361577	0.0821694	4.40038	1.0806e-05	0.000126244	GM12166	predicted gene 12166 [Source:MGI Symbol;Acc:MGI:3650635]
ENSMUSG00000029064	1742.28	-0.222363	0.0505503	-4.39885	1.08827e-05	0.000127064	GNB1	guanine nucleotide binding protein (G protein), beta 1 [Source:MGI Symbol;Acc:MGI:95781]
ENSMUSG00000055926	12.3219	-0.848351	0.193106	-4.39319	1.117e-05	0.000130339	GM14137	predicted gene 14137 [Source:MGI Symbol;Acc:MGI:3651144]
ENSMUSG00000058446	2177.21	-0.245499	0.0559091	-4.39103	1.12813e-05	0.000131399	ZNRF2	zinc and ring finger 2 [Source:MGI Symbol;Acc:MGI:1196246]
ENSMUSG00000071014	352.939	0.45321	0.10324	4.38988	1.13411e-05	0.000132017	NDUFB6	NADH dehydrogenase (ubiquinone) 1 beta subcomplex, 6 [Source:MGI Symbol;Acc:MGI:2684983]
ENSMUSG00000073490	136.436	-0.706688	0.160987	-4.38973	1.13492e-05	0.000132031	IFI207	interferon activated gene 207 [Source:MGI Symbol;Acc:MGI:2138302]
ENSMUSG00000090213	1272.92	-0.254116	0.0578916	-4.3895	1.1361e-05	0.000132089	TMEM189	transmembrane protein 189 [Source:MGI Symbol;Acc:MGI:2142624]
ENSMUSG00000007872	6.00361	0.80708	0.18395	4.38749	1.14665e-05	0.000133155	ID3	inhibitor of DNA binding 3 [Source:MGI Symbol;Acc:MGI:96398]
ENSMUSG00000071537	48.0024	-0.715459	0.163064	-4.38759	1.14616e-05	0.000133155	KLRG2	killer cell lectin-like receptor subfamily G, member 2 [Source:MGI Symbol;Acc:MGI:1921503]
ENSMUSG00000063316	750.123	0.504263	0.114951	4.38676	1.15053e-05	0.000133525	RPL27	ribosomal protein L27 [Source:MGI Symbol;Acc:MGI:98036]
ENSMUSG00000007850	2623.66	0.342926	0.0782152	4.38439	1.16314e-05	0.000134828	HNRNPH1	heterogeneous nuclear ribonucleoprotein H1 [Source:MGI Symbol;Acc:MGI:1891925]
ENSMUSG00000026347	3.60674	-0.729546	0.166397	-4.38438	1.16315e-05	0.000134828	TMEM163	transmembrane protein 163 [Source:MGI Symbol;Acc:MGI:1919410]
ENSMUSG00000062585	603.83	-0.434785	0.0991976	-4.38302	1.17047e-05	0.000135513	CNR2	cannabinoid receptor 2 (macrophage) [Source:MGI Symbol;Acc:MGI:104650]
ENSMUSG00000089942	30.6026	0.852022	0.19439	4.38305	1.17028e-05	0.000135513	PIRA2	paired-Ig-like receptor A2 [Source:MGI Symbol;Acc:MGI:1195970]
ENSMUSG00000056880	57.2823	-0.707937	0.16157	-4.3816	1.1781e-05	0.000136315	GADL1	glutamate decarboxylase-like 1 [Source:MGI Symbol;Acc:MGI:1920998]
ENSMUSG00000022751	214.853	0.480289	0.109619	4.38146	1.17888e-05	0.000136324	NIT2	nitrilase family, member 2 [Source:MGI Symbol;Acc:MGI:1261838]
ENSMUSG00000085912	102.52	0.561146	0.128082	4.38116	1.18047e-05	0.000136426	TRP53COR1	tumor protein p53 pathway corepressor 1 [Source:MGI Symbol;Acc:MGI:3801771]
ENSMUSG00000078201	200.758	0.35634	0.0813409	4.38082	1.18233e-05	0.000136558	TMEM203	transmembrane protein 203 [Source:MGI Symbol;Acc:MGI:2443597]
ENSMUSG00000027569	513.089	0.424677	0.0969682	4.37955	1.18922e-05	0.000137273	MRGBP	MRG/MORF4L binding protein [Source:MGI Symbol;Acc:MGI:1920497]
ENSMUSG00000020163	855.845	0.493779	0.112753	4.37929	1.19068e-05	0.000137359	UQCR11	ubiquinol-cytochrome c reductase, complex III subunit XI [Source:MGI Symbol;Acc:MGI:1913844]
ENSMUSG00000031012	1117.3	-0.251145	0.0573701	-4.37763	1.19974e-05	0.000138239	CASK	calcium/calmodulin-dependent serine protein kinase (MAGUK family) [Source:MGI Symbol;Acc:MGI:1309489]
ENSMUSG00000066892	492.668	0.339073	0.0774549	4.37768	1.19949e-05	0.000138239	FBXL12	F-box and leucine-rich repeat protein 12 [Source:MGI Symbol;Acc:MGI:1354738]
ENSMUSG00000032373	11.6287	0.616246	0.140816	4.37625	1.20741e-05	0.000138957	CAR12	carbonic anhydrase 12 [Source:MGI Symbol;Acc:MGI:1923709]
ENSMUSG00000072235	5230.9	0.352988	0.08066	4.37625	1.20739e-05	0.000138957	TUBA1A	tubulin, alpha 1A [Source:MGI Symbol;Acc:MGI:98869]
ENSMUSG00000079388	84.6626	0.677327	0.154806	4.37533	1.21249e-05	0.000139391	2610042L04RIK	RIKEN cDNA 2610042L04 gene [Source:MGI Symbol;Acc:MGI:1914305]
ENSMUSG00000104720	15.576	0.819851	0.187381	4.3753	1.21263e-05	0.000139391	GM43138	predicted gene 43138 [Source:MGI Symbol;Acc:MGI:5663275]
ENSMUSG00000067714	541.515	-0.419479	0.0959068	-4.37382	1.22094e-05	0.000140263	LPAR5	lysophosphatidic acid receptor 5 [Source:MGI Symbol;Acc:MGI:2685918]
ENSMUSG00000031709	633.759	-0.478684	0.109474	-4.37257	1.22794e-05	0.000140816	TBC1D9	TBC1 domain family, member 9 [Source:MGI Symbol;Acc:MGI:1918560]
ENSMUSG00000049999	377.211	-0.358072	0.0818897	-4.37261	1.22772e-05	0.000140816	PPP1R3D	protein phosphatase 1, regulatory subunit 3D [Source:MGI Symbol;Acc:MGI:1917664]
ENSMUSG00000102894	5.22535	0.808661	0.184932	4.37275	1.2269e-05	0.000140816	GM37851	predicted gene, 37851 [Source:MGI Symbol;Acc:MGI:5611079]
ENSMUSG00000024277	1675.59	-0.270778	0.061984	-4.36853	1.25088e-05	0.000143344	MAPRE2	microtubule-associated protein, RP/EB family, member 2 [Source:MGI Symbol;Acc:MGI:106271]
ENSMUSG00000098905	90.3313	0.545055	0.124772	4.36842	1.25148e-05	0.000143344	ZFP953	zinc finger protein 953 [Source:MGI Symbol;Acc:MGI:3612873]
ENSMUSG00000030894	7755.7	-0.312582	0.0716003	-4.36565	1.26742e-05	0.000145085	TPP1	tripeptidyl peptidase I [Source:MGI Symbol;Acc:MGI:1336194]
ENSMUSG00000059669	392.185	0.36362	0.0833303	4.36361	1.27935e-05	0.000146364	TAF1B	TATA-box binding protein associated factor, RNA polymerase I, B [Source:MGI Symbol;Acc:MGI:109577]
ENSMUSG00000080316	53.5462	-0.695901	0.159496	-4.36311	1.28224e-05	0.000146607	SPACA6	sperm acrosome associated 6 [Source:MGI Symbol;Acc:MGI:1922452]
ENSMUSG00000003099	1438.04	0.204864	0.0469562	4.36288	1.28361e-05	0.000146625	PPP5C	protein phosphatase 5, catalytic subunit [Source:MGI Symbol;Acc:MGI:102666]
ENSMUSG00000025227	190.885	-0.457396	0.104842	-4.3627	1.28468e-05	0.000146625	MFSD13A	major facilitator superfamily domain containing 13a [Source:MGI Symbol;Acc:MGI:1922396]
ENSMUSG00000087289	95.6976	0.539882	0.123748	4.36275	1.28438e-05	0.000146625	4933424M12RIK	RIKEN cDNA 4933424M12 gene [Source:MGI Symbol;Acc:MGI:1914798]
ENSMUSG00000079334	436.321	0.270075	0.0619308	4.36091	1.29524e-05	0.000147743	NAT6	N-acetyltransferase 6 [Source:MGI Symbol;Acc:MGI:1888902]
ENSMUSG00000030154	3.08434	0.631098	0.144722	4.36076	1.29614e-05	0.000147758	KLRB1F	killer cell lectin-like receptor subfamily B member 1F [Source:MGI Symbol;Acc:MGI:2442965]
ENSMUSG00000019189	2407.12	-0.315419	0.0723456	-4.35989	1.30125e-05	0.000148254	RNF145	ring finger protein 145 [Source:MGI Symbol;Acc:MGI:1921565]
ENSMUSG00000018761	581.164	0.325117	0.0745761	4.35953	1.30341e-05	0.000148412	MPDU1	mannose-P-dolichol utilization defect 1 [Source:MGI Symbol;Acc:MGI:1346040]
ENSMUSG00000031838	724.803	-0.367573	0.0843338	-4.35855	1.30925e-05	0.000148901	IFI30	interferon gamma inducible protein 30 [Source:MGI Symbol;Acc:MGI:2137648]
ENSMUSG00000036819	231.237	0.586764	0.13462	4.35867	1.30856e-05	0.000148901	JMJD4	jumonji domain containing 4 [Source:MGI Symbol;Acc:MGI:2144404]
ENSMUSG00000045438	252.07	0.428119	0.0982835	4.35596	1.32485e-05	0.000150587	COX19	cytochrome c oxidase assembly protein 19 [Source:MGI Symbol;Acc:MGI:1915283]
ENSMUSG00000029815	218.804	0.470067	0.107956	4.35425	1.33523e-05	0.000151633	MALSU1	mitochondrial assembly of ribosomal large subunit 1 [Source:MGI Symbol;Acc:MGI:1922843]
ENSMUSG00000050022	1264.76	-0.265597	0.0609982	-4.35419	1.33562e-05	0.000151633	AMZ1	archaelysin family metallopeptidase 1 [Source:MGI Symbol;Acc:MGI:2442258]
ENSMUSG00000082035	50.9147	0.759176	0.174393	4.35324	1.34142e-05	0.000152201	RPL17-PS8	ribosomal protein L17, pseudogene 8 [Source:MGI Symbol;Acc:MGI:3802129]
ENSMUSG00000031387	1843.09	-0.230616	0.0529779	-4.35307	1.34243e-05	0.000152227	RENBP	renin binding protein [Source:MGI Symbol;Acc:MGI:105940]
ENSMUSG00000030452	2030.12	0.230516	0.0529632	4.35239	1.34661e-05	0.00015261	NIPA2	non imprinted in Prader-Willi/Angelman syndrome 2 homolog (human) [Source:MGI Symbol;Acc:MGI:1913918]
ENSMUSG00000036606	10224.7	-0.381088	0.0875708	-4.35177	1.35044e-05	0.000152954	PLXNB2	plexin B2 [Source:MGI Symbol;Acc:MGI:2154239]
ENSMUSG00000075284	755.595	-0.321006	0.0737821	-4.35073	1.35688e-05	0.000153594	WIPF1	WAS/WASL interacting protein family, member 1 [Source:MGI Symbol;Acc:MGI:2178801]
ENSMUSG00000049775	62685.9	0.444566	0.102202	4.34989	1.36207e-05	0.000154091	TMSB4X	thymosin, beta 4, X chromosome [Source:MGI Symbol;Acc:MGI:99510]
ENSMUSG00000095260	2.32334	0.699316	0.160796	4.34909	1.36701e-05	0.000154559	GM25890	predicted gene, 25890 [Source:MGI Symbol;Acc:MGI:5455667]
ENSMUSG00000074622	12020.5	0.245516	0.0564671	4.34794	1.37424e-05	0.000155286	MAFB	v-maf musculoaponeurotic fibrosarcoma oncogene family, protein B (avian) [Source:MGI Symbol;Acc:MGI:104555]
ENSMUSG00000013997	717.534	0.272745	0.0627411	4.34715	1.37918e-05	0.000155753	NIT1	nitrilase 1 [Source:MGI Symbol;Acc:MGI:1350916]
ENSMUSG00000026223	12765.3	-0.274454	0.0631409	-4.34668	1.38211e-05	0.000155992	ITM2C	integral membrane protein 2C [Source:MGI Symbol;Acc:MGI:1927594]
ENSMUSG00000035069	792.834	0.269772	0.0620661	4.34653	1.38308e-05	0.000156011	OMA1	OMA1 zinc metallopeptidase [Source:MGI Symbol;Acc:MGI:1914263]
ENSMUSG00000048498	29.2884	0.600077	0.138168	4.3431	1.40484e-05	0.000158373	CD300E	CD300E molecule [Source:MGI Symbol;Acc:MGI:2387602]
ENSMUSG00000029918	712.787	0.402668	0.0927502	4.34142	1.41566e-05	0.000159499	MRPS33	mitochondrial ribosomal protein S33 [Source:MGI Symbol;Acc:MGI:1338046]
ENSMUSG00000096401	106.956	0.518417	0.119469	4.33936	1.42901e-05	0.000160909	GM21811	predicted gene, 21811 [Source:MGI Symbol;Acc:MGI:5433975]
ENSMUSG00000078490	997.032	0.3566	0.082193	4.33858	1.43409e-05	0.000161388	CFAP74	cilia and flagella associated protein 74 [Source:MGI Symbol;Acc:MGI:1917130]
ENSMUSG00000027322	56.0786	-0.749572	0.172859	-4.33632	1.44889e-05	0.000162958	SIGLEC1	sialic acid binding Ig-like lectin 1, sialoadhesin [Source:MGI Symbol;Acc:MGI:99668]
ENSMUSG00000025026	949.584	-0.384924	0.088791	-4.33518	1.45644e-05	0.000163711	ADD3	adducin 3 (gamma) [Source:MGI Symbol;Acc:MGI:1351615]
ENSMUSG00000060703	1902.04	0.394638	0.0910354	4.33499	1.45767e-05	0.000163754	CD302	CD302 antigen [Source:MGI Symbol;Acc:MGI:1913455]
ENSMUSG00000039753	994.763	0.33769	0.0779272	4.3334	1.46822e-05	0.000164844	FBXL5	F-box and leucine-rich repeat protein 5 [Source:MGI Symbol;Acc:MGI:2152883]
ENSMUSG00000056493	132.572	-0.491081	0.113403	-4.33041	1.48835e-05	0.000167006	FOXK1	forkhead box K1 [Source:MGI Symbol;Acc:MGI:1347488]
ENSMUSG00000090307	4.81951	0.673866	0.155639	4.32968	1.49328e-05	0.000167463	1700071M16RIK	RIKEN cDNA 1700071M16 gene [Source:MGI Symbol;Acc:MGI:1920754]
ENSMUSG00000039109	454.426	0.781491	0.180531	4.32885	1.49889e-05	0.000167907	F13A1	coagulation factor XIII, A1 subunit [Source:MGI Symbol;Acc:MGI:1921395]
ENSMUSG00000097120	3.20997	0.755818	0.174601	4.32884	1.49898e-05	0.000167907	GM26887	predicted gene, 26887 [Source:MGI Symbol;Acc:MGI:5477381]
ENSMUSG00000024067	335.201	0.471379	0.108905	4.32836	1.5022e-05	0.00016817	DPY30	dpy-30, histone methyltransferase complex regulatory subunit [Source:MGI Symbol;Acc:MGI:1913560]
ENSMUSG00000064373	37623.4	0.359531	0.0831179	4.32555	1.5215e-05	0.000170232	SELENOP	selenoprotein P [Source:MGI Symbol;Acc:MGI:894288]
ENSMUSG00000029642	640.916	0.410551	0.0949314	4.32471	1.52731e-05	0.000170783	POLR1D	polymerase (RNA) I polypeptide D [Source:MGI Symbol;Acc:MGI:108403]
ENSMUSG00000038836	191.978	0.454249	0.105043	4.32441	1.52943e-05	0.00017092	AGBL3	ATP/GTP binding protein-like 3 [Source:MGI Symbol;Acc:MGI:1923473]
ENSMUSG00000105350	5.05401	0.819851	0.189657	4.3228	1.54063e-05	0.000172073	4930537H20RIK	RIKEN cDNA 4930537H20 gene [Source:MGI Symbol;Acc:MGI:1923075]
ENSMUSG00000105871	9.96488	0.839493	0.194291	4.32079	1.5547e-05	0.000173543	GM43147	predicted gene 43147 [Source:MGI Symbol;Acc:MGI:5663284]
ENSMUSG00000036905	91110.5	-0.230412	0.0533366	-4.31996	1.56055e-05	0.000174096	C1QB	complement component 1, q subcomponent, beta polypeptide [Source:MGI Symbol;Acc:MGI:88224]
ENSMUSG00000032342	507.963	0.237054	0.0548771	4.31972	1.56226e-05	0.000174186	MTO1	mitochondrial tRNA translation optimization 1 [Source:MGI Symbol;Acc:MGI:1915541]
ENSMUSG00000001366	457.761	0.348206	0.0806209	4.31906	1.56698e-05	0.000174612	FBXO9	f-box protein 9 [Source:MGI Symbol;Acc:MGI:1918788]
ENSMUSG00000020812	99.8224	0.538655	0.124721	4.31886	1.56836e-05	0.000174665	1810032O08RIK	RIKEN cDNA 1810032O08 gene [Source:MGI Symbol;Acc:MGI:1913543]
ENSMUSG00000103160	6.37027	-0.830719	0.192474	-4.31601	1.58877e-05	0.000176836	C130012C08RIK	RIKEN cDNA C130012C08 gene [Source:MGI Symbol;Acc:MGI:2145684]
ENSMUSG00000048924	27.6734	0.788505	0.182713	4.31553	1.59221e-05	0.000177116	CCDC125	coiled-coil domain containing 125 [Source:MGI Symbol;Acc:MGI:1923291]
ENSMUSG00000048163	85392.1	-0.300903	0.0697413	-4.31456	1.59924e-05	0.000177796	SELPLG	selectin, platelet (p-selectin) ligand [Source:MGI Symbol;Acc:MGI:106689]
ENSMUSG00000096971	8.67403	-0.820764	0.190249	-4.31416	1.6021e-05	0.000178011	4930556M19RIK	RIKEN cDNA 4930556M19 gene [Source:MGI Symbol;Acc:MGI:1922509]
ENSMUSG00000020134	2367.95	-0.221732	0.0514039	-4.31353	1.60668e-05	0.000178417	PELI1	pellino 1 [Source:MGI Symbol;Acc:MGI:1914495]
ENSMUSG00000062797	267.187	0.376341	0.0872722	4.31227	1.61589e-05	0.000179234	HIKESHI	heat shock protein nuclear import factor [Source:MGI Symbol;Acc:MGI:96738]
ENSMUSG00000070427	43.9506	-0.72334	0.167739	-4.31229	1.61569e-05	0.000179234	IL18BP	interleukin 18 binding protein [Source:MGI Symbol;Acc:MGI:1333800]
ENSMUSG00000024146	708.532	0.373667	0.0866827	4.31075	1.62703e-05	0.000180365	CRIPT	cysteine-rich PDZ-binding protein [Source:MGI Symbol;Acc:MGI:1929655]
ENSMUSG00000025969	473.653	-0.374184	0.086812	-4.31028	1.6305e-05	0.000180647	NRP2	neuropilin 2 [Source:MGI Symbol;Acc:MGI:1100492]
ENSMUSG00000026021	1093.08	0.313833	0.0728185	4.3098	1.63399e-05	0.00018093	SUMO1	small ubiquitin-like modifier 1 [Source:MGI Symbol;Acc:MGI:1197010]
ENSMUSG00000006010	662.022	0.326798	0.0758337	4.3094	1.63701e-05	0.000181083	BC003331	cDNA sequence BC003331 [Source:MGI Symbol;Acc:MGI:2385108]
ENSMUSG00000029510	295.497	0.616669	0.1431	4.30936	1.63725e-05	0.000181083	GPC2	glypican 2 (cerebroglycan) [Source:MGI Symbol;Acc:MGI:1919201]
ENSMUSG00000000409	9.44704	0.791822	0.18376	4.30901	1.63987e-05	0.000181268	LCK	lymphocyte protein tyrosine kinase [Source:MGI Symbol;Acc:MGI:96756]
ENSMUSG00000021493	13.5247	0.825068	0.191495	4.30855	1.64325e-05	0.000181538	PDLIM7	PDZ and LIM domain 7 [Source:MGI Symbol;Acc:MGI:1914649]
ENSMUSG00000056050	883.567	-0.213152	0.0494733	-4.30842	1.64424e-05	0.000181543	MIA3	melanoma inhibitory activity 3 [Source:MGI Symbol;Acc:MGI:2443183]
ENSMUSG00000030663	1166.79	0.298663	0.0693275	4.308	1.64739e-05	0.000181787	1110004F10RIK	RIKEN cDNA 1110004F10 gene [Source:MGI Symbol;Acc:MGI:1929274]
ENSMUSG00000086015	103.684	0.615058	0.142804	4.307	1.65487e-05	0.000182508	4833417C18RIK	RIKEN cDNA 4833417C18 gene [Source:MGI Symbol;Acc:MGI:1921156]
ENSMUSG00000097384	6.54098	0.836968	0.194369	4.30607	1.66182e-05	0.00018317	GM26815	predicted gene, 26815 [Source:MGI Symbol;Acc:MGI:5477309]
ENSMUSG00000022560	416.584	-0.354214	0.0822799	-4.30499	1.66991e-05	0.000183956	SLC52A2	solute carrier protein 52, member 2 [Source:MGI Symbol;Acc:MGI:1289288]
ENSMUSG00000005442	375.309	-0.432393	0.100492	-4.30277	1.68677e-05	0.000185708	CIC	capicua transcriptional repressor [Source:MGI Symbol;Acc:MGI:1918972]
ENSMUSG00000064341	8159.64	0.415322	0.0965487	4.30168	1.69507e-05	0.000186515	MT-ND1	mitochondrially encoded NADH dehydrogenase 1 [Source:MGI Symbol;Acc:MGI:101787]
ENSMUSG00000032186	7.58625	-0.775891	0.180422	-4.30043	1.70468e-05	0.000187359	TMOD2	tropomodulin 2 [Source:MGI Symbol;Acc:MGI:1355335]
ENSMUSG00000062101	244.065	0.41729	0.0970341	4.30045	1.70455e-05	0.000187359	ZFP119B	zinc finger protein 119b [Source:MGI Symbol;Acc:MGI:2385323]
ENSMUSG00000051116	32.6571	0.751973	0.174897	4.29953	1.71161e-05	0.000188014	GM8121	predicted pseudogene 8121 [Source:MGI Symbol;Acc:MGI:3645325]
ENSMUSG00000020740	1212.54	-0.255891	0.0595222	-4.2991	1.71497e-05	0.000188169	GGA3	golgi associated, gamma adaptin ear containing, ARF binding protein 3 [Source:MGI Symbol;Acc:MGI:2384159]
ENSMUSG00000033446	4700.25	0.262192	0.0609865	4.29918	1.71429e-05	0.000188169	LPAR6	lysophosphatidic acid receptor 6 [Source:MGI Symbol;Acc:MGI:1914418]
ENSMUSG00000020283	734.195	0.36891	0.0858533	4.29699	1.73135e-05	0.000189858	PEX13	peroxisomal biogenesis factor 13 [Source:MGI Symbol;Acc:MGI:1919379]
ENSMUSG00000056054	2341.92	0.591601	0.137699	4.29633	1.73649e-05	0.000190314	S100A8	S100 calcium binding protein A8 (calgranulin A) [Source:MGI Symbol;Acc:MGI:88244]
ENSMUSG00000034659	2407.26	-0.332673	0.077479	-4.29372	1.75701e-05	0.000192454	TMEM109	transmembrane protein 109 [Source:MGI Symbol;Acc:MGI:1915789]
ENSMUSG00000029864	109.727	-0.617169	0.143746	-4.29346	1.75913e-05	0.000192576	GSTK1	glutathione S-transferase kappa 1 [Source:MGI Symbol;Acc:MGI:1923513]
ENSMUSG00000005986	188.576	0.415344	0.0967896	4.2912	1.77709e-05	0.000194432	ANKRD13D	ankyrin repeat domain 13 family, member D [Source:MGI Symbol;Acc:MGI:1915673]
ENSMUSG00000097354	19.5671	0.816177	0.190229	4.2905	1.7827e-05	0.000194935	2310001H17RIK	RIKEN cDNA 2310001H17 gene [Source:MGI Symbol;Acc:MGI:1923682]
ENSMUSG00000021327	1366.73	0.241196	0.0562181	4.29037	1.78374e-05	0.000194939	ZKSCAN3	zinc finger with KRAB and SCAN domains 3 [Source:MGI Symbol;Acc:MGI:1919989]
ENSMUSG00000022370	344.102	0.498024	0.116085	4.29017	1.78538e-05	0.000195007	MRPL13	mitochondrial ribosomal protein L13 [Source:MGI Symbol;Acc:MGI:2137218]
ENSMUSG00000006390	2026.03	-0.319425	0.0744881	-4.28827	1.80072e-05	0.000196461	ELOVL1	elongation of very long chain fatty acids (FEN1/Elo2, SUR4/Elo3, yeast)-like 1 [Source:MGI Symbol;Acc:MGI:1858959]
ENSMUSG00000024042	18.7134	0.829352	0.193398	4.28832	1.8003e-05	0.000196461	SIK1	salt inducible kinase 1 [Source:MGI Symbol;Acc:MGI:104754]
ENSMUSG00000031780	2.1992	0.562416	0.131173	4.28759	1.8062e-05	0.000196874	CCL17	chemokine (C-C motif) ligand 17 [Source:MGI Symbol;Acc:MGI:1329039]
ENSMUSG00000043716	1553.73	0.353921	0.0825462	4.28755	1.80655e-05	0.000196874	RPL7	ribosomal protein L7 [Source:MGI Symbol;Acc:MGI:98073]
ENSMUSG00000007029	1628.39	-0.264528	0.0617151	-4.28627	1.81695e-05	0.000197896	VARS	valyl-tRNA synthetase [Source:MGI Symbol;Acc:MGI:90675]
ENSMUSG00000028795	296.151	0.338474	0.0789933	4.28484	1.8287e-05	0.000199063	CCDC28B	coiled coil domain containing 28B [Source:MGI Symbol;Acc:MGI:1913514]
ENSMUSG00000043664	184.61	-0.421151	0.0982949	-4.28457	1.83093e-05	0.000199193	TMEM221	transmembrane protein 221 [Source:MGI Symbol;Acc:MGI:3525074]
ENSMUSG00000030884	1085.48	0.315766	0.0737118	4.2838	1.83731e-05	0.000199775	UQCRC2	ubiquinol cytochrome c reductase core protein 2 [Source:MGI Symbol;Acc:MGI:1914253]
ENSMUSG00000019467	132.502	-0.402145	0.0938926	-4.28304	1.84361e-05	0.000200347	ARHGEF25	Rho guanine nucleotide exchange factor (GEF) 25 [Source:MGI Symbol;Acc:MGI:1277173]
ENSMUSG00000100183	7.1234	0.734672	0.171646	4.28016	1.8676e-05	0.00020284	GM28512	predicted gene 28512 [Source:MGI Symbol;Acc:MGI:5579218]
ENSMUSG00000047182	45.0682	-0.683297	0.159704	-4.27853	1.88134e-05	0.000204217	IRS3	insulin receptor substrate 3 [Source:MGI Symbol;Acc:MGI:1194882]
ENSMUSG00000022102	35.9139	0.786331	0.183801	4.27816	1.88441e-05	0.000204435	DOK2	docking protein 2 [Source:MGI Symbol;Acc:MGI:1332623]
ENSMUSG00000030579	17195.6	0.367817	0.0860452	4.2747	1.91395e-05	0.000207524	TYROBP	TYRO protein tyrosine kinase binding protein [Source:MGI Symbol;Acc:MGI:1277211]
ENSMUSG00000021775	950.34	0.409974	0.0959669	4.27204	1.93697e-05	0.000209902	NR1D2	nuclear receptor subfamily 1, group D, member 2 [Source:MGI Symbol;Acc:MGI:2449205]
ENSMUSG00000085829	17.6547	0.7742	0.181252	4.27139	1.94257e-05	0.000210391	GM4285	predicted gene 4285 [Source:MGI Symbol;Acc:MGI:3782463]
ENSMUSG00000006585	126.803	-0.483872	0.113315	-4.27016	1.95329e-05	0.000211433	CDT1	chromatin licensing and DNA replication factor 1 [Source:MGI Symbol;Acc:MGI:1914427]
ENSMUSG00000020780	1004.54	-0.310217	0.0726927	-4.26751	1.97665e-05	0.000213841	SRP68	signal recognition particle 68 [Source:MGI Symbol;Acc:MGI:1917447]
ENSMUSG00000029428	1354.74	-0.274881	0.0644624	-4.26421	2.00615e-05	0.000216911	STX2	syntaxin 2 [Source:MGI Symbol;Acc:MGI:108059]
ENSMUSG00000020577	2848.37	-0.21164	0.0496359	-4.26385	2.00938e-05	0.000217018	TSPAN13	tetraspanin 13 [Source:MGI Symbol;Acc:MGI:1913359]
ENSMUSG00000026893	147.859	-0.545372	0.127905	-4.2639	2.00893e-05	0.000217018	GCA	grancalcin [Source:MGI Symbol;Acc:MGI:1918521]
ENSMUSG00000000386	73.7491	-0.697766	0.163661	-4.26349	2.01257e-05	0.00021724	MX1	MX dynamin-like GTPase 1 [Source:MGI Symbol;Acc:MGI:97243]
ENSMUSG00000024168	926.918	0.350369	0.0821914	4.26285	2.01839e-05	0.000217747	TMEM204	transmembrane protein 204 [Source:MGI Symbol;Acc:MGI:3039635]
ENSMUSG00000036908	30902.7	-0.199965	0.0469109	-4.26266	2.02012e-05	0.000217797	UNC93B1	unc-93 homolog B1 (C. elegans) [Source:MGI Symbol;Acc:MGI:1859307]
ENSMUSG00000066637	113.888	0.592691	0.139046	4.26255	2.02111e-05	0.000217797	TTC32	tetratricopeptide repeat domain 32 [Source:MGI Symbol;Acc:MGI:1922766]
ENSMUSG00000087187	7.97074	0.828502	0.194386	4.26215	2.02471e-05	0.000218063	GM13431	predicted gene 13431 [Source:MGI Symbol;Acc:MGI:3650776]
ENSMUSG00000038005	440.371	0.317594	0.0745181	4.26197	2.02631e-05	0.000218113	HPF1	histone PARylation factor 1 [Source:MGI Symbol;Acc:MGI:1919862]
ENSMUSG00000027570	23.9281	0.807822	0.189548	4.26183	2.02759e-05	0.00021813	COL9A3	collagen, type IX, alpha 3 [Source:MGI Symbol;Acc:MGI:894686]
ENSMUSG00000066798	218.466	0.317176	0.0744303	4.26139	2.03162e-05	0.000218441	ZBTB6	zinc finger and BTB domain containing 6 [Source:MGI Symbol;Acc:MGI:2442998]
ENSMUSG00000038429	1190.08	-0.238874	0.0560711	-4.2602	2.04247e-05	0.000219364	USP5	ubiquitin specific peptidase 5 (isopeptidase T) [Source:MGI Symbol;Acc:MGI:1347343]
ENSMUSG00000097021	14.0019	0.828786	0.194537	4.2603	2.04155e-05	0.000219364	4933433G15RIK	RIKEN cDNA 4933433G15 gene [Source:MGI Symbol;Acc:MGI:1918524]
ENSMUSG00000019872	530.188	0.311275	0.073092	4.25868	2.05642e-05	0.000220739	SMPDL3A	sphingomyelin phosphodiesterase, acid-like 3A [Source:MGI Symbol;Acc:MGI:1931437]
ENSMUSG00000071478	7.16935	0.648193	0.152228	4.25803	2.06233e-05	0.00022125	HIST1H2AD	histone cluster 1, H2ad [Source:MGI Symbol;Acc:MGI:2448289]
ENSMUSG00000005800	211.286	0.55091	0.129396	4.25756	2.06667e-05	0.000221593	MMP8	matrix metallopeptidase 8 [Source:MGI Symbol;Acc:MGI:1202395]
ENSMUSG00000028923	2382.82	-0.234371	0.0550586	-4.25675	2.07421e-05	0.000222277	NECAP2	NECAP endocytosis associated 2 [Source:MGI Symbol;Acc:MGI:1913397]
ENSMUSG00000073236	70.5607	0.561777	0.131984	4.25639	2.07757e-05	0.000222515	2500004C02RIK	RIKEN cDNA 2500004C02 gene [Source:MGI Symbol;Acc:MGI:1919576]
ENSMUSG00000056413	485.161	-0.353646	0.0830992	-4.2557	2.08392e-05	0.000223071	ADAP1	ArfGAP with dual PH domains 1 [Source:MGI Symbol;Acc:MGI:2442201]
ENSMUSG00000029287	9.40754	0.76278	0.179249	4.25541	2.08662e-05	0.000223236	TGFBR3	transforming growth factor, beta receptor III [Source:MGI Symbol;Acc:MGI:104637]
ENSMUSG00000038323	229.651	0.397858	0.0935235	4.2541	2.09888e-05	0.000224299	1700066M21RIK	RIKEN cDNA 1700066M21 gene [Source:MGI Symbol;Acc:MGI:1920717]
ENSMUSG00000068923	427.326	-0.354552	0.083343	-4.25413	2.09863e-05	0.000224299	SYT11	synaptotagmin XI [Source:MGI Symbol;Acc:MGI:1859547]
ENSMUSG00000053293	713.597	-0.44702	0.105096	-4.25346	2.10496e-05	0.000224824	POM121	nuclear pore membrane protein 121 [Source:MGI Symbol;Acc:MGI:2137624]
ENSMUSG00000025204	1450.15	0.535093	0.125818	4.25293	2.10988e-05	0.000225225	NDUFB8	NADH dehydrogenase (ubiquinone) 1 beta subcomplex 8 [Source:MGI Symbol;Acc:MGI:1914514]
ENSMUSG00000037217	14.1912	-0.787221	0.185183	-4.25105	2.12772e-05	0.000227004	SYN1	synapsin I [Source:MGI Symbol;Acc:MGI:98460]
ENSMUSG00000084289	67.7777	-0.506232	0.119101	-4.25046	2.13333e-05	0.000227477	GM6977	predicted gene 6977 [Source:MGI Symbol;Acc:MGI:3647597]
ENSMUSG00000047215	1145.75	0.620568	0.146018	4.24994	2.13828e-05	0.000227878	RPL9	ribosomal protein L9 [Source:MGI Symbol;Acc:MGI:1298373]
ENSMUSG00000004069	848.025	-0.253906	0.0597505	-4.24943	2.14314e-05	0.000228271	DNAJA3	DnaJ heat shock protein family (Hsp40) member A3 [Source:MGI Symbol;Acc:MGI:1933786]
ENSMUSG00000046879	1067.88	-0.326231	0.0767768	-4.24908	2.14647e-05	0.000228499	IRGM1	immunity-related GTPase family M member 1 [Source:MGI Symbol;Acc:MGI:107567]
ENSMUSG00000023067	189.361	-0.520003	0.122389	-4.24877	2.14952e-05	0.000228698	CDKN1A	cyclin-dependent kinase inhibitor 1A (P21) [Source:MGI Symbol;Acc:MGI:104556]
ENSMUSG00000017309	2.79759	0.635612	0.149617	4.24825	2.15447e-05	0.000229098	CD300LG	CD300 molecule like family member G [Source:MGI Symbol;Acc:MGI:1289168]
ENSMUSG00000001472	2428.66	0.259584	0.0611278	4.24659	2.17053e-05	0.000230678	TCF25	transcription factor 25 (basic helix-loop-helix) [Source:MGI Symbol;Acc:MGI:1914105]
ENSMUSG00000022175	3379.31	-0.331952	0.0781752	-4.24626	2.17364e-05	0.000230882	LRP10	low-density lipoprotein receptor-related protein 10 [Source:MGI Symbol;Acc:MGI:1929480]
ENSMUSG00000024896	1015.79	-0.247981	0.0584078	-4.24568	2.17935e-05	0.000231361	MINPP1	multiple inositol polyphosphate histidine phosphatase 1 [Source:MGI Symbol;Acc:MGI:1336159]
ENSMUSG00000025504	3.54725	0.57675	0.135849	4.24553	2.18074e-05	0.000231381	EPS8L2	EPS8-like 2 [Source:MGI Symbol;Acc:MGI:2138828]
ENSMUSG00000034612	108.185	-0.636158	0.149852	-4.24523	2.18365e-05	0.000231563	CHST11	carbohydrate sulfotransferase 11 [Source:MGI Symbol;Acc:MGI:1927166]
ENSMUSG00000028549	77.4033	0.573597	0.135128	4.24483	2.18762e-05	0.000231835	ITGB3BP	integrin beta 3 binding protein (beta3-endonexin) [Source:MGI Symbol;Acc:MGI:1914983]
ENSMUSG00000106918	613.778	0.524604	0.12359	4.24473	2.18862e-05	0.000231835	MRPL33	mitochondrial ribosomal protein L33 [Source:MGI Symbol;Acc:MGI:2137225]
ENSMUSG00000029385	4363.53	0.26867	0.0633049	4.24407	2.19502e-05	0.000232386	CCNG2	cyclin G2 [Source:MGI Symbol;Acc:MGI:1095734]
ENSMUSG00000040747	17874.4	0.269253	0.0634464	4.24379	2.19777e-05	0.000232549	CD53	CD53 antigen [Source:MGI Symbol;Acc:MGI:88341]
ENSMUSG00000035278	695.001	0.353477	0.0833083	4.24299	2.20557e-05	0.000233247	PLEKHJ1	pleckstrin homology domain containing, family J member 1 [Source:MGI Symbol;Acc:MGI:1925920]
ENSMUSG00000001143	1438	-0.278354	0.0656319	-4.24114	2.22384e-05	0.00023505	LMAN2L	lectin, mannose-binding 2-like [Source:MGI Symbol;Acc:MGI:2443010]
ENSMUSG00000001123	4739.3	-0.301918	0.0711968	-4.24061	2.22909e-05	0.000235476	LGALS9	lectin, galactose binding, soluble 9 [Source:MGI Symbol;Acc:MGI:109496]
ENSMUSG00000025171	577.666	0.215799	0.0509094	4.23887	2.24643e-05	0.000237178	UBTD1	ubiquitin domain containing 1 [Source:MGI Symbol;Acc:MGI:2385092]
ENSMUSG00000024613	691.982	-0.399324	0.0942349	-4.23754	2.25983e-05	0.000238462	TCOF1	treacle ribosome biogenesis factor 1 [Source:MGI Symbol;Acc:MGI:892003]
ENSMUSG00000028803	123	-0.404047	0.0953602	-4.23706	2.26464e-05	0.000238709	NIPAL3	NIPA-like domain containing 3 [Source:MGI Symbol;Acc:MGI:1921802]
ENSMUSG00000041638	2313.41	-0.427575	0.100911	-4.23717	2.26356e-05	0.000238709	GCN1L1	GCN1 general control of amino-acid synthesis 1-like 1 (yeast) [Source:MGI Symbol;Acc:MGI:2444248]
ENSMUSG00000057841	1455.82	0.528136	0.124654	4.23682	2.26704e-05	0.000238831	RPL32	ribosomal protein L32 [Source:MGI Symbol;Acc:MGI:98038]
ENSMUSG00000001248	3953.28	0.353229	0.0833751	4.23663	2.26898e-05	0.000238906	GRAMD1A	GRAM domain containing 1A [Source:MGI Symbol;Acc:MGI:105490]
ENSMUSG00000034216	2121.94	-0.283311	0.0668739	-4.2365	2.27031e-05	0.000238914	VPS18	VPS18 CORVET/HOPS core subunit [Source:MGI Symbol;Acc:MGI:2443626]
ENSMUSG00000030020	13.7272	-0.788008	0.186125	-4.23375	2.29829e-05	0.000241728	PRICKLE2	prickle planar cell polarity protein 2 [Source:MGI Symbol;Acc:MGI:1925144]
ENSMUSG00000069727	198.36	0.4535	0.10714	4.23278	2.30821e-05	0.000242639	ZFP975	zinc finger protein 975 [Source:MGI Symbol;Acc:MGI:3648690]
ENSMUSG00000066687	8.50008	0.76285	0.180266	4.23181	2.31818e-05	0.000243555	ZBTB16	zinc finger and BTB domain containing 16 [Source:MGI Symbol;Acc:MGI:103222]
ENSMUSG00000052102	1744.76	-0.240197	0.0567628	-4.23159	2.32042e-05	0.000243657	GNPDA1	glucosamine-6-phosphate deaminase 1 [Source:MGI Symbol;Acc:MGI:1347054]
ENSMUSG00000040247	44.078	0.691921	0.163566	4.23021	2.33472e-05	0.000245025	TBC1D10C	TBC1 domain family, member 10c [Source:MGI Symbol;Acc:MGI:1922072]
ENSMUSG00000049734	1002.83	-0.423254	0.10012	-4.22747	2.36332e-05	0.000247892	TREX1	three prime repair exonuclease 1 [Source:MGI Symbol;Acc:MGI:1328317]
ENSMUSG00000002477	276.666	0.391995	0.0927436	4.22665	2.37197e-05	0.000248663	SNRPD1	small nuclear ribonucleoprotein D1 [Source:MGI Symbol;Acc:MGI:98344]
ENSMUSG00000090207	24.2394	0.786087	0.186004	4.22619	2.37682e-05	0.000249037	4930524O07RIK	RIKEN cDNA 4930524O07 gene [Source:MGI Symbol;Acc:MGI:1915514]
ENSMUSG00000097887	126.296	0.406661	0.0962397	4.22551	2.38405e-05	0.000249659	GM26542	predicted gene, 26542 [Source:MGI Symbol;Acc:MGI:5477036]
ENSMUSG00000044156	7.79388	0.775741	0.18363	4.22447	2.39503e-05	0.000250673	HEPACAM2	HEPACAM family member 2 [Source:MGI Symbol;Acc:MGI:2141520]
ENSMUSG00000033416	488.139	0.285626	0.0676654	4.22115	2.4306e-05	0.000254258	GUCD1	guanylyl cyclase domain containing 1 [Source:MGI Symbol;Acc:MGI:1916028]
ENSMUSG00000090192	3.13852	0.553885	0.1313	4.21846	2.4598e-05	0.000257173	GM16556	predicted gene 16556 [Source:MGI Symbol;Acc:MGI:4414976]
ENSMUSG00000034403	805.062	-0.297889	0.0706571	-4.21597	2.48702e-05	0.000259878	PJA1	praja ring finger 1, E3 ubiquitin protein ligase [Source:MGI Symbol;Acc:MGI:1101765]
ENSMUSG00000040296	624.096	-0.357699	0.0848562	-4.21536	2.49384e-05	0.000260449	DDX58	DEAD (Asp-Glu-Ala-Asp) box polypeptide 58 [Source:MGI Symbol;Acc:MGI:2442858]
ENSMUSG00000026496	1443.45	-0.298647	0.0708633	-4.21441	2.50429e-05	0.000261399	PARP1	poly (ADP-ribose) polymerase family, member 1 [Source:MGI Symbol;Acc:MGI:1340806]
ENSMUSG00000081855	7.41068	0.804583	0.190924	4.21416	2.50711e-05	0.000261552	RPL17-PS5	ribosomal protein L17, pseudogene 5 [Source:MGI Symbol;Acc:MGI:3704246]
ENSMUSG00000025981	260.019	0.325924	0.0773509	4.21358	2.51358e-05	0.000262085	COQ10B	coenzyme Q10B [Source:MGI Symbol;Acc:MGI:1915126]
ENSMUSG00000092183	23.352	0.7768	0.184363	4.21342	2.51532e-05	0.000262126	4930515G01RIK	RIKEN cDNA 4930515G01 gene [Source:MGI Symbol;Acc:MGI:1914892]
ENSMUSG00000028737	344.895	-0.358529	0.0851344	-4.21133	2.53867e-05	0.000264417	ALDH4A1	aldehyde dehydrogenase 4 family, member A1 [Source:MGI Symbol;Acc:MGI:2443883]
ENSMUSG00000029162	791.083	0.293172	0.0696512	4.20914	2.56342e-05	0.00026685	KHK	ketohexokinase [Source:MGI Symbol;Acc:MGI:1096353]
ENSMUSG00000026698	727.98	0.37643	0.0894404	4.20872	2.5682e-05	0.000267203	PIGC	phosphatidylinositol glycan anchor biosynthesis, class C [Source:MGI Symbol;Acc:MGI:1914542]
ENSMUSG00000038526	3.48668	0.646979	0.153789	4.20692	2.58879e-05	0.0002692	CAR14	carbonic anhydrase 14 [Source:MGI Symbol;Acc:MGI:1344341]
ENSMUSG00000078784	702.353	0.434171	0.103246	4.20521	2.60844e-05	0.000271098	1810022K09RIK	RIKEN cDNA 1810022K09 gene [Source:MGI Symbol;Acc:MGI:1916376]
ENSMUSG00000103103	22.0558	0.74294	0.176696	4.20463	2.61506e-05	0.00027164	4833445I07RIK	RIKEN cDNA 4833445I07 gene [Source:MGI Symbol;Acc:MGI:2143268]
ENSMUSG00000097042	60.2301	0.673543	0.160216	4.20398	2.62266e-05	0.000272283	GM17491	predicted gene, 17491 [Source:MGI Symbol;Acc:MGI:4937125]
ENSMUSG00000034211	848.615	0.378812	0.0901619	4.20146	2.65194e-05	0.000275175	MRPS17	mitochondrial ribosomal protein S17 [Source:MGI Symbol;Acc:MGI:1913508]
ENSMUSG00000040165	6.51125	0.787037	0.187399	4.19979	2.67161e-05	0.000277067	CD209C	CD209c antigen [Source:MGI Symbol;Acc:MGI:2157945]
ENSMUSG00000031627	1221.87	-0.238046	0.0567143	-4.19729	2.70133e-05	0.000279998	IRF2	interferon regulatory factor 2 [Source:MGI Symbol;Acc:MGI:96591]
ENSMUSG00000020184	1087.9	0.283325	0.0675079	4.19692	2.70572e-05	0.000280303	MDM2	transformed mouse 3T3 cell double minute 2 [Source:MGI Symbol;Acc:MGI:96952]
ENSMUSG00000020331	19.8522	-0.778439	0.185518	-4.19603	2.71628e-05	0.000281246	HCN2	hyperpolarization-activated, cyclic nucleotide-gated K+ 2 [Source:MGI Symbol;Acc:MGI:1298210]
ENSMUSG00000034932	196.66	0.507521	0.121001	4.19435	2.73655e-05	0.000283193	MRPL54	mitochondrial ribosomal protein L54 [Source:MGI Symbol;Acc:MGI:1913297]
ENSMUSG00000090659	98.8025	0.482192	0.114981	4.19365	2.74496e-05	0.000283911	ZFP493	zinc finger protein 493 [Source:MGI Symbol;Acc:MGI:1920208]
ENSMUSG00000026034	4489.67	0.322692	0.0769854	4.19159	2.77e-05	0.000286052	CLK1	CDC-like kinase 1 [Source:MGI Symbol;Acc:MGI:107403]
ENSMUSG00000042842	3.94121	0.684669	0.163344	4.19159	2.77011e-05	0.000286052	SERPINB6B	serine (or cysteine) peptidase inhibitor, clade B, member 6b [Source:MGI Symbol;Acc:MGI:894688]
ENSMUSG00000045136	261.928	-0.605042	0.144342	-4.19173	2.76833e-05	0.000286052	TUBB2B	tubulin, beta 2B class IIB [Source:MGI Symbol;Acc:MGI:1920960]
ENSMUSG00000064284	196.931	0.424455	0.101311	4.18962	2.79416e-05	0.000288381	CDPF1	cysteine rich, DPF motif domain containing 1 [Source:MGI Symbol;Acc:MGI:1919605]
ENSMUSG00000001665	76.23	-0.66434	0.158575	-4.18944	2.7964e-05	0.000288458	GSTT3	glutathione S-transferase, theta 3 [Source:MGI Symbol;Acc:MGI:2143526]
ENSMUSG00000030879	898.841	0.410454	0.0979893	4.18876	2.80483e-05	0.000289173	MRPL17	mitochondrial ribosomal protein L17 [Source:MGI Symbol;Acc:MGI:1351608]
ENSMUSG00000097479	61.4739	0.664774	0.15872	4.18833	2.81011e-05	0.000289563	GM26582	predicted gene, 26582 [Source:MGI Symbol;Acc:MGI:5477076]
ENSMUSG00000000157	28.952	0.613484	0.146541	4.18643	2.8338e-05	0.000291791	ITGB2L	integrin beta 2-like [Source:MGI Symbol;Acc:MGI:1277979]
ENSMUSG00000040997	1420.96	-0.319085	0.0762202	-4.18635	2.83476e-05	0.000291791	ABHD4	abhydrolase domain containing 4 [Source:MGI Symbol;Acc:MGI:1915938]
ENSMUSG00000033318	110.84	0.508858	0.121581	4.18534	2.8474e-05	0.000292936	GSTT2	glutathione S-transferase, theta 2 [Source:MGI Symbol;Acc:MGI:106188]
ENSMUSG00000000827	1158.41	0.299657	0.0716031	4.18497	2.85203e-05	0.000293256	TPD52L2	tumor protein D52-like 2 [Source:MGI Symbol;Acc:MGI:1913564]
ENSMUSG00000027078	404.322	-0.41728	0.0997414	-4.18362	2.86899e-05	0.000294843	UBE2L6	ubiquitin-conjugating enzyme E2L 6 [Source:MGI Symbol;Acc:MGI:1914500]
ENSMUSG00000039853	402.707	-0.341913	0.0817299	-4.18345	2.87115e-05	0.000294908	TRIM14	tripartite motif-containing 14 [Source:MGI Symbol;Acc:MGI:1921985]
ENSMUSG00000003348	1928.35	-0.282801	0.0676375	-4.18113	2.90069e-05	0.000297783	MOB3A	MOB kinase activator 3A [Source:MGI Symbol;Acc:MGI:3050117]
ENSMUSG00000003200	1842.97	0.167804	0.0401482	4.17961	2.92008e-05	0.000299605	SH3GL1	SH3-domain GRB2-like 1 [Source:MGI Symbol;Acc:MGI:700010]
ENSMUSG00000097296	65.7697	-0.681036	0.162947	-4.1795	2.92153e-05	0.000299605	GM26532	predicted gene, 26532 [Source:MGI Symbol;Acc:MGI:5477026]
ENSMUSG00000031865	941.477	-0.321588	0.0769512	-4.17912	2.92639e-05	0.000299943	DCTN1	dynactin 1 [Source:MGI Symbol;Acc:MGI:107745]
ENSMUSG00000030149	15.9639	0.786376	0.188197	4.17848	2.93467e-05	0.000300633	KLRK1	killer cell lectin-like receptor subfamily K, member 1 [Source:MGI Symbol;Acc:MGI:1196250]
ENSMUSG00000047246	324.312	0.596311	0.142735	4.17774	2.94422e-05	0.000301451	HIST1H2BE	histone cluster 1, H2be [Source:MGI Symbol;Acc:MGI:2448380]
ENSMUSG00000031950	1583.25	0.388029	0.0928898	4.1773	2.9499e-05	0.000301872	GABARAPL2	gamma-aminobutyric acid (GABA) A receptor-associated protein-like 2 [Source:MGI Symbol;Acc:MGI:1890602]
ENSMUSG00000022949	22.2484	0.594216	0.142275	4.17655	2.95968e-05	0.000302712	CLIC6	chloride intracellular channel 6 [Source:MGI Symbol;Acc:MGI:2146607]
ENSMUSG00000097705	332.317	-0.571845	0.136923	-4.17639	2.96166e-05	0.000302755	GM26740	predicted gene, 26740 [Source:MGI Symbol;Acc:MGI:5477234]
ENSMUSG00000073422	926.293	0.329994	0.0790187	4.17615	2.96482e-05	0.000302917	H2-KE6	H2-K region expressed gene 6 [Source:MGI Symbol;Acc:MGI:95911]
ENSMUSG00000023764	1573.53	-0.393356	0.0942153	-4.17507	2.97894e-05	0.000304198	SFI1	Sfi1 homolog, spindle assembly associated (yeast) [Source:MGI Symbol;Acc:MGI:1926137]
ENSMUSG00000024725	2042.82	0.263852	0.0632034	4.17465	2.98438e-05	0.000304586	OSTF1	osteoclast stimulating factor 1 [Source:MGI Symbol;Acc:MGI:700012]
ENSMUSG00000032316	964.293	0.287581	0.0688892	4.17454	2.98589e-05	0.000304586	CLK3	CDC-like kinase 3 [Source:MGI Symbol;Acc:MGI:1098670]
ENSMUSG00000096206	2.02738	0.667058	0.159811	4.17404	2.99247e-05	0.000304935	GM22317	predicted gene, 22317 [Source:MGI Symbol;Acc:MGI:5452094]
ENSMUSG00000096659	2.02738	0.667058	0.159811	4.17404	2.99247e-05	0.000304935	GM25679	predicted gene, 25679 [Source:MGI Symbol;Acc:MGI:5455456]
ENSMUSG00000016495	1623.91	0.364695	0.0874067	4.17239	3.0142e-05	0.000306987	PLGRKT	plasminogen receptor, C-terminal lysine transmembrane protein [Source:MGI Symbol;Acc:MGI:1915009]
ENSMUSG00000035329	630.313	0.338794	0.0812295	4.17082	3.03503e-05	0.000308946	FBXO33	F-box protein 33 [Source:MGI Symbol;Acc:MGI:1917861]
ENSMUSG00000019689	78.3401	0.621069	0.148983	4.16871	3.06323e-05	0.000311324	FMC1	formation of mitochondrial complex V assembly factor 1 [Source:MGI Symbol;Acc:MGI:1913367]
ENSMUSG00000040321	243.418	0.387247	0.0928933	4.16873	3.06307e-05	0.000311324	ZFP770	zinc finger protein 770 [Source:MGI Symbol;Acc:MGI:2445100]
ENSMUSG00000041538	943.09	-0.288167	0.0691238	-4.16885	3.06142e-05	0.000311324	H2-OB	histocompatibility 2, O region beta locus [Source:MGI Symbol;Acc:MGI:95925]
ENSMUSG00000028609	227.137	0.47643	0.114322	4.16745	3.08026e-05	0.000312889	MAGOH	mago homolog, exon junction complex core component [Source:MGI Symbol;Acc:MGI:1330312]
ENSMUSG00000006058	417.751	0.271179	0.065156	4.16199	3.15485e-05	0.000320298	SNF8	SNF8, ESCRT-II complex subunit, homolog (S. cerevisiae) [Source:MGI Symbol;Acc:MGI:1343161]
ENSMUSG00000024104	1449.69	-0.244911	0.0588623	-4.16074	3.17224e-05	0.000321689	WASHC2	WASH complex subunit 2` [Source:MGI Symbol;Acc:MGI:106463]
ENSMUSG00000024165	752.995	-0.278233	0.0668726	-4.16064	3.17355e-05	0.000321689	HN1L	hematological and neurological expressed 1-like [Source:MGI Symbol;Acc:MGI:1196260]
ENSMUSG00000049124	107.385	0.616369	0.14814	4.16072	3.17243e-05	0.000321689	GM8186	predicted gene 8186 [Source:MGI Symbol;Acc:MGI:3643110]
ENSMUSG00000021832	738.671	0.316427	0.0760718	4.15959	3.18824e-05	0.000323008	PSMC6	proteasome (prosome, macropain) 26S subunit, ATPase, 6 [Source:MGI Symbol;Acc:MGI:1914339]
ENSMUSG00000029095	16.1292	-0.8004	0.192439	-4.15923	3.19323e-05	0.000323344	ABLIM2	actin-binding LIM protein 2 [Source:MGI Symbol;Acc:MGI:2385758]
ENSMUSG00000024293	656.533	0.283023	0.0680613	4.15835	3.20556e-05	0.000324422	ESCO1	establishment of sister chromatid cohesion N-acetyltransferase 1 [Source:MGI Symbol;Acc:MGI:1925055]
ENSMUSG00000027752	641.71	0.36947	0.0888571	4.15803	3.21004e-05	0.000324706	EXOSC8	exosome component 8 [Source:MGI Symbol;Acc:MGI:1916889]
ENSMUSG00000044854	3.69854	0.744818	0.179166	4.15713	3.22272e-05	0.000325817	1700056E22RIK	RIKEN cDNA 1700056E22 gene [Source:MGI Symbol;Acc:MGI:1920613]
ENSMUSG00000002944	109.259	0.742724	0.178695	4.15637	3.2334e-05	0.000326726	CD36	CD36 antigen [Source:MGI Symbol;Acc:MGI:107899]
ENSMUSG00000028452	4757.11	-0.331468	0.079795	-4.15399	3.26727e-05	0.000329976	VCP	valosin containing protein [Source:MGI Symbol;Acc:MGI:99919]
ENSMUSG00000035722	707.006	-0.365027	0.0878976	-4.15287	3.28334e-05	0.000331425	ABCA7	ATP-binding cassette, sub-family A (ABC1), member 7 [Source:MGI Symbol;Acc:MGI:1351646]
ENSMUSG00000030276	99.5347	0.533979	0.128604	4.15212	3.29416e-05	0.000332343	TTLL3	tubulin tyrosine ligase-like family, member 3 [Source:MGI Symbol;Acc:MGI:2141418]
ENSMUSG00000022312	682.134	0.40401	0.0973095	4.15181	3.29861e-05	0.000332602	EIF3H	eukaryotic translation initiation factor 3, subunit H [Source:MGI Symbol;Acc:MGI:1915385]
ENSMUSG00000054414	955.337	-0.255295	0.0614928	-4.15162	3.30128e-05	0.000332602	SLC30A7	solute carrier family 30 (zinc transporter), member 7 [Source:MGI Symbol;Acc:MGI:1913750]
ENSMUSG00000069729	867.781	-0.367464	0.0885119	-4.15158	3.3019e-05	0.000332602	ARID1B	AT rich interactive domain 1B (SWI-like) [Source:MGI Symbol;Acc:MGI:1926129]
ENSMUSG00000047230	3.72729	0.544911	0.13127	4.15108	3.30905e-05	0.000333149	CLDN2	claudin 2 [Source:MGI Symbol;Acc:MGI:1276110]
ENSMUSG00000028073	408.627	-0.532995	0.128428	-4.15013	3.32285e-05	0.000334364	PEAR1	platelet endothelial aggregation receptor 1 [Source:MGI Symbol;Acc:MGI:1920432]
ENSMUSG00000034765	19.8111	0.804209	0.193785	4.15001	3.32465e-05	0.000334371	DUSP5	dual specificity phosphatase 5 [Source:MGI Symbol;Acc:MGI:2685183]
ENSMUSG00000031875	2011.15	-0.200154	0.0482331	-4.14972	3.32885e-05	0.000334619	CMTM3	CKLF-like MARVEL transmembrane domain containing 3 [Source:MGI Symbol;Acc:MGI:2447162]
ENSMUSG00000028670	874.966	-0.237634	0.0572744	-4.14905	3.33864e-05	0.000335428	LYPLA2	lysophospholipase 2 [Source:MGI Symbol;Acc:MGI:1347000]
ENSMUSG00000066440	409.214	-0.491829	0.118584	-4.1475	3.36125e-05	0.000337524	ZFYVE26	zinc finger, FYVE domain containing 26 [Source:MGI Symbol;Acc:MGI:1924767]
ENSMUSG00000029082	6.14254	0.759973	0.183277	4.14657	3.37493e-05	0.000338721	BST1	bone marrow stromal cell antigen 1 [Source:MGI Symbol;Acc:MGI:105370]
ENSMUSG00000022354	874.081	0.452745	0.109211	4.14558	3.38949e-05	0.000339829	NDUFB9	NADH dehydrogenase (ubiquinone) 1 beta subcomplex, 9 [Source:MGI Symbol;Acc:MGI:1913468]
ENSMUSG00000022678	863.991	-0.264727	0.0638573	-4.14561	3.38913e-05	0.000339829	NDE1	nudE neurodevelopment protein 1 [Source:MGI Symbol;Acc:MGI:1914453]
ENSMUSG00000021945	807.057	0.249357	0.0601655	4.14452	3.40531e-05	0.000341238	ZMYM2	zinc finger, MYM-type 2 [Source:MGI Symbol;Acc:MGI:1923257]
ENSMUSG00000027634	953.642	-0.227765	0.0549686	-4.14355	3.4197e-05	0.000342502	NDRG3	N-myc downstream regulated gene 3 [Source:MGI Symbol;Acc:MGI:1352499]
ENSMUSG00000036817	616.429	-0.234872	0.0566901	-4.14309	3.42664e-05	0.000343019	SUN1	Sad1 and UNC84 domain containing 1 [Source:MGI Symbol;Acc:MGI:1924303]
ENSMUSG00000009394	13.3558	-0.805189	0.194455	-4.14074	3.46181e-05	0.00034636	SYN2	synapsin II [Source:MGI Symbol;Acc:MGI:103020]
ENSMUSG00000105613	4.50815	0.777326	0.187737	4.1405	3.46552e-05	0.000346552	GM43684	predicted gene 43684 [Source:MGI Symbol;Acc:MGI:5663821]
ENSMUSG00000020211	456.45	-0.360089	0.0869772	-4.14004	3.4725e-05	0.000346955	SF3A2	splicing factor 3a, subunit 2 [Source:MGI Symbol;Acc:MGI:104912]
ENSMUSG00000042246	677.096	0.312433	0.0754669	4.13999	3.47315e-05	0.000346955	TMC7	transmembrane channel-like gene family 7 [Source:MGI Symbol;Acc:MGI:2443317]
ENSMUSG00000048546	1122.93	-0.350364	0.0846415	-4.13939	3.48232e-05	0.000347692	TOB2	transducer of ERBB2, 2 [Source:MGI Symbol;Acc:MGI:1888525]
ENSMUSG00000016763	131.406	-0.534815	0.129206	-4.13923	3.48478e-05	0.000347757	SCUBE1	signal peptide, CUB domain, EGF-like 1 [Source:MGI Symbol;Acc:MGI:1890616]
ENSMUSG00000074384	98.0929	0.596864	0.144202	4.13909	3.48692e-05	0.000347791	AI429214	expressed sequence AI429214 [Source:MGI Symbol;Acc:MGI:2142538]
ENSMUSG00000068749	938.464	0.430498	0.104017	4.13871	3.49261e-05	0.000348178	PSMA5	proteasome (prosome, macropain) subunit, alpha type 5 [Source:MGI Symbol;Acc:MGI:1347009]
ENSMUSG00000036208	110.043	0.443311	0.107131	4.13802	3.50321e-05	0.000349015	NEPRO	nucleolus and neural progenitor protein [Source:MGI Symbol;Acc:MGI:2384836]
ENSMUSG00000068663	227.314	-0.393729	0.0951512	-4.13792	3.50462e-05	0.000349015	CLEC16A	C-type lectin domain family 16, member A [Source:MGI Symbol;Acc:MGI:1921624]
ENSMUSG00000028608	2101.87	0.351196	0.0848888	4.13713	3.51678e-05	0.000350045	0610037L13RIK	RIKEN cDNA 0610037L13 gene [Source:MGI Symbol;Acc:MGI:1921348]
ENSMUSG00000033909	453.296	-0.432751	0.104619	-4.13645	3.52719e-05	0.000350901	USP36	ubiquitin specific peptidase 36 [Source:MGI Symbol;Acc:MGI:1919594]
ENSMUSG00000042129	2047.43	-0.367612	0.088882	-4.13595	3.53485e-05	0.000351482	RASSF4	Ras association (RalGDS/AF-6) domain family member 4 [Source:MGI Symbol;Acc:MGI:2386853]
ENSMUSG00000069135	580.069	0.347934	0.0841276	4.13579	3.53737e-05	0.000351551	FGFR1OP	Fgfr1 oncogene partner [Source:MGI Symbol;Acc:MGI:1922546]
ENSMUSG00000029038	1023.81	0.308691	0.0746609	4.13457	3.55612e-05	0.000353233	SSU72	Ssu72 RNA polymerase II CTD phosphatase homolog (yeast) [Source:MGI Symbol;Acc:MGI:1916241]
ENSMUSG00000020346	4102.96	-0.224749	0.0543675	-4.13388	3.56693e-05	0.000353942	MGAT1	mannoside acetylglucosaminyltransferase 1 [Source:MGI Symbol;Acc:MGI:96973]
ENSMUSG00000054874	1337.14	-0.433698	0.104913	-4.13388	3.56686e-05	0.000353942	PCNX3	pecanex homolog 3 [Source:MGI Symbol;Acc:MGI:1861733]
ENSMUSG00000043432	149.296	0.462543	0.111931	4.1324	3.59002e-05	0.000355867	LENG9	leukocyte receptor cluster (LRC) member 9 [Source:MGI Symbol;Acc:MGI:2444509]
ENSMUSG00000090952	58.0304	0.557815	0.134983	4.13248	3.58876e-05	0.000355867	GM17251	predicted gene, 17251 [Source:MGI Symbol;Acc:MGI:4936885]
ENSMUSG00000048000	549.774	0.334766	0.0810255	4.13161	3.6023e-05	0.000356902	GIGYF2	GRB10 interacting GYF protein 2 [Source:MGI Symbol;Acc:MGI:2138584]
ENSMUSG00000029249	597.219	-0.291093	0.070461	-4.13126	3.60774e-05	0.000357257	REST	RE1-silencing transcription factor [Source:MGI Symbol;Acc:MGI:104897]
ENSMUSG00000074466	44.367	0.68914	0.166829	4.13082	3.61476e-05	0.000357769	GM15417	predicted gene 15417 [Source:MGI Symbol;Acc:MGI:3642531]
ENSMUSG00000030922	49.1943	0.610003	0.147751	4.12857	3.6502e-05	0.000361091	LYRM1	LYR motif containing 1 [Source:MGI Symbol;Acc:MGI:1921169]
ENSMUSG00000029798	527.816	-0.303195	0.0734555	-4.1276	3.66564e-05	0.000362433	HERC6	hect domain and RLD 6 [Source:MGI Symbol;Acc:MGI:1914388]
ENSMUSG00000037563	666.847	0.473804	0.114868	4.12476	3.71116e-05	0.000366571	RPS16	ribosomal protein S16 [Source:MGI Symbol;Acc:MGI:98118]
ENSMUSG00000044030	843.991	-0.280856	0.0680904	-4.12476	3.71129e-05	0.000366571	IRF2BP1	interferon regulatory factor 2 binding protein 1 [Source:MGI Symbol;Acc:MGI:2442159]
ENSMUSG00000073676	604.743	0.501856	0.121677	4.12448	3.71575e-05	0.000366823	HSPE1	heat shock protein 1 (chaperonin 10) [Source:MGI Symbol;Acc:MGI:104680]
ENSMUSG00000039031	296.674	0.376479	0.0912919	4.1239	3.72508e-05	0.000367369	ARHGAP18	Rho GTPase activating protein 18 [Source:MGI Symbol;Acc:MGI:1921160]
ENSMUSG00000067813	11.2141	0.783897	0.190085	4.12393	3.72455e-05	0.000367369	XKR9	X-linked Kx blood group related 9 [Source:MGI Symbol;Acc:MGI:2686466]
ENSMUSG00000033307	601.471	-0.327789	0.0794971	-4.12328	3.73513e-05	0.000367984	MIF	macrophage migration inhibitory factor (glycosylation-inhibiting factor) [Source:MGI Symbol;Acc:MGI:96982]
ENSMUSG00000059554	122.8	0.452879	0.109834	4.12329	3.73492e-05	0.000367984	CCDC28A	coiled-coil domain containing 28A [Source:MGI Symbol;Acc:MGI:2443508]
ENSMUSG00000024084	54.9554	0.660408	0.160188	4.1227	3.74461e-05	0.000368729	QPCT	glutaminyl-peptide cyclotransferase (glutaminyl cyclase) [Source:MGI Symbol;Acc:MGI:1917786]
ENSMUSG00000021725	743.868	0.322485	0.0782254	4.12251	3.74763e-05	0.000368839	PARP8	poly (ADP-ribose) polymerase family, member 8 [Source:MGI Symbol;Acc:MGI:1098713]
ENSMUSG00000034413	18.7837	-0.796145	0.193149	-4.12192	3.75726e-05	0.000369598	NEURL1B	neuralized E3 ubiquitin protein ligase 1B [Source:MGI Symbol;Acc:MGI:3643092]
ENSMUSG00000042406	1105.53	0.231508	0.0561817	4.1207	3.77727e-05	0.000371377	ATF4	activating transcription factor 4 [Source:MGI Symbol;Acc:MGI:88096]
ENSMUSG00000013822	354.363	0.463136	0.112416	4.11984	3.79139e-05	0.000372575	ELOF1	ELF1 homolog, elongation factor 1 [Source:MGI Symbol;Acc:MGI:1913376]
ENSMUSG00000044600	1285.14	0.285795	0.0693856	4.11893	3.80633e-05	0.000373853	SMIM7	small integral membrane protein 7 [Source:MGI Symbol;Acc:MGI:1914068]
ENSMUSG00000091199	1.44616	-0.483037	0.117311	-4.11759	3.82856e-05	0.000375845	GM2619	predicted gene 2619 [Source:MGI Symbol;Acc:MGI:3780787]
ENSMUSG00000052435	6.69959	0.672064	0.163254	4.11669	3.84355e-05	0.000377125	CEBPE	CCAAT/enhancer binding protein (C/EBP), epsilon [Source:MGI Symbol;Acc:MGI:103572]
ENSMUSG00000097128	41.4283	0.586812	0.142565	4.1161	3.8533e-05	0.00037789	GM26884	predicted gene, 26884 [Source:MGI Symbol;Acc:MGI:5477378]
ENSMUSG00000023800	13.3724	0.799223	0.194199	4.11549	3.86365e-05	0.000378713	TIAM2	T cell lymphoma invasion and metastasis 2 [Source:MGI Symbol;Acc:MGI:1344338]
ENSMUSG00000001768	4950.35	-0.323734	0.078677	-4.11472	3.87651e-05	0.00037978	RIN2	Ras and Rab interactor 2 [Source:MGI Symbol;Acc:MGI:1921280]
ENSMUSG00000028719	838.236	0.318793	0.0774902	4.11397	3.88911e-05	0.000380821	CMPK1	cytidine monophosphate (UMP-CMP) kinase 1 [Source:MGI Symbol;Acc:MGI:1913838]
ENSMUSG00000002981	4779.02	-0.26137	0.0635747	-4.11122	3.93569e-05	0.000385187	CLPTM1	cleft lip and palate associated transmembrane protein 1 [Source:MGI Symbol;Acc:MGI:1927155]
ENSMUSG00000018372	237.529	0.433632	0.105523	4.10934	3.96794e-05	0.000388146	CEP95	centrosomal protein 95 [Source:MGI Symbol;Acc:MGI:2443502]
ENSMUSG00000027540	3611.5	-0.265279	0.0645737	-4.10815	3.98838e-05	0.000389948	PTPN1	protein tyrosine phosphatase, non-receptor type 1 [Source:MGI Symbol;Acc:MGI:97805]
ENSMUSG00000036599	969.425	-0.370483	0.0901871	-4.10794	3.9921e-05	0.000390114	CHST12	carbohydrate sulfotransferase 12 [Source:MGI Symbol;Acc:MGI:1929064]
ENSMUSG00000040710	419.542	0.31725	0.0772459	4.10702	4.00802e-05	0.000391175	ST8SIA4	ST8 alpha-N-acetyl-neuraminide alpha-2,8-sialyltransferase 4 [Source:MGI Symbol;Acc:MGI:106018]
ENSMUSG00000057359	74.3928	0.492304	0.119871	4.10696	4.00904e-05	0.000391175	GM17494	predicted gene, 17494 [Source:MGI Symbol;Acc:MGI:4937128]
ENSMUSG00000099875	20.2919	0.73129	0.178052	4.10718	4.00524e-05	0.000391175	GM15453	predicted gene 15453 [Source:MGI Symbol;Acc:MGI:3642874]
ENSMUSG00000004568	699.675	-0.357883	0.0871498	-4.10652	4.01656e-05	0.000391711	ARHGEF18	rho/rac guanine nucleotide exchange factor (GEF) 18 [Source:MGI Symbol;Acc:MGI:2142567]
ENSMUSG00000031917	483.532	0.347027	0.084552	4.10431	4.05529e-05	0.000395288	NIP7	NIP7, nucleolar pre-rRNA processing protein [Source:MGI Symbol;Acc:MGI:1913414]
ENSMUSG00000074497	3.27119	0.66863	0.163001	4.102	4.09603e-05	0.000399058	A430078G23RIK	RIKEN cDNA A430078G23 gene [Source:MGI Symbol;Acc:MGI:2442135]
ENSMUSG00000086109	10.6209	-0.795946	0.194065	-4.10143	4.10603e-05	0.000399831	GM13391	predicted gene 13391 [Source:MGI Symbol;Acc:MGI:3651526]
ENSMUSG00000036966	382.055	-0.354896	0.0865529	-4.10034	4.12545e-05	0.000401519	SPRYD3	SPRY domain containing 3 [Source:MGI Symbol;Acc:MGI:2446175]
ENSMUSG00000034345	330.527	0.423532	0.103303	4.09989	4.13343e-05	0.00040189	GTF2H5	general transcription factor IIH, polypeptide 5 [Source:MGI Symbol;Acc:MGI:107227]
ENSMUSG00000040269	199.698	0.3927	0.0957804	4.10001	4.13135e-05	0.00040189	MRPS28	mitochondrial ribosomal protein S28 [Source:MGI Symbol;Acc:MGI:1913480]
ENSMUSG00000026245	623.155	-0.283892	0.0692674	-4.09849	4.15853e-05	0.000404127	FARSB	phenylalanyl-tRNA synthetase, beta subunit [Source:MGI Symbol;Acc:MGI:1346035]
ENSMUSG00000063428	5.67958	-0.641501	0.156541	-4.09797	4.16781e-05	0.000404825	DDO	D-aspartate oxidase [Source:MGI Symbol;Acc:MGI:1925528]
ENSMUSG00000040006	769.75	-0.283612	0.0692234	-4.09706	4.18432e-05	0.000406079	GINM1	glycoprotein integral membrane 1 [Source:MGI Symbol;Acc:MGI:2384905]
ENSMUSG00000096629	42.5707	0.663455	0.161936	4.09703	4.18492e-05	0.000406079	GM3383	predicted gene 3383 [Source:MGI Symbol;Acc:MGI:3781561]
ENSMUSG00000002014	2487.76	0.356676	0.0870713	4.09637	4.19685e-05	0.000406706	SSR4	signal sequence receptor, delta [Source:MGI Symbol;Acc:MGI:1099464]
ENSMUSG00000030122	262.452	-0.344833	0.0841803	-4.09636	4.19693e-05	0.000406706	PTMS	parathymosin [Source:MGI Symbol;Acc:MGI:1916452]
ENSMUSG00000056209	34.4239	0.723477	0.176616	4.09632	4.19771e-05	0.000406706	NPM3	nucleoplasmin 3 [Source:MGI Symbol;Acc:MGI:894653]
ENSMUSG00000020471	271.162	-0.331288	0.080921	-4.09396	4.2406e-05	0.000410653	POLD2	polymerase (DNA directed), delta 2, regulatory subunit [Source:MGI Symbol;Acc:MGI:1097163]
ENSMUSG00000038954	295.337	0.363298	0.0887424	4.09385	4.2427e-05	0.000410653	SUPT3	suppressor of Ty 3 [Source:MGI Symbol;Acc:MGI:1923723]
ENSMUSG00000085396	213.096	0.539023	0.131687	4.09322	4.25416e-05	0.000411555	FIRRE	functional intergenic repeating RNA element [Source:MGI Symbol;Acc:MGI:2147989]
ENSMUSG00000021496	110.064	0.54203	0.132433	4.09288	4.26052e-05	0.000411964	PCBD2	pterin 4 alpha carbinolamine dehydratase/dimerization cofactor of hepatocyte nuclear factor 1 alpha (TCF1) 2 [Source:MGI Symbol;Acc:MGI:1919812]
ENSMUSG00000011382	104.008	-0.476832	0.116521	-4.09223	4.27252e-05	0.000412918	DHDH	dihydrodiol dehydrogenase (dimeric) [Source:MGI Symbol;Acc:MGI:1919005]
ENSMUSG00000021182	5.86397	0.627506	0.153395	4.09078	4.2992e-05	0.000415288	CCDC88C	coiled-coil domain containing 88C [Source:MGI Symbol;Acc:MGI:1915589]
ENSMUSG00000022792	370.141	0.361596	0.0884682	4.08729	4.36439e-05	0.000421163	YARS2	tyrosyl-tRNA synthetase 2 (mitochondrial) [Source:MGI Symbol;Acc:MGI:1917370]
ENSMUSG00000074419	2.3004	0.601898	0.147261	4.08729	4.36433e-05	0.000421163	GM15448	predicted gene 15448 [Source:MGI Symbol;Acc:MGI:3705216]
ENSMUSG00000031618	195.732	-0.488695	0.119572	-4.08705	4.369e-05	0.000421398	NR3C2	nuclear receptor subfamily 3, group C, member 2 [Source:MGI Symbol;Acc:MGI:99459]
ENSMUSG00000009185	30.265	-0.795166	0.194717	-4.0837	4.43246e-05	0.000427305	CCL8	chemokine (C-C motif) ligand 8 [Source:MGI Symbol;Acc:MGI:101878]
ENSMUSG00000020831	781.243	0.215932	0.0529093	4.08117	4.481e-05	0.000431769	0610010K14RIK	RIKEN cDNA 0610010K14 gene [Source:MGI Symbol;Acc:MGI:1915609]
ENSMUSG00000025316	323.719	-0.505133	0.123813	-4.07981	4.50722e-05	0.000434079	BANP	BTG3 associated nuclear protein [Source:MGI Symbol;Acc:MGI:1889023]
ENSMUSG00000028980	1148.5	-0.348353	0.0854137	-4.07842	4.53438e-05	0.000436476	H6PD	hexose-6-phosphate dehydrogenase (glucose 1-dehydrogenase) [Source:MGI Symbol;Acc:MGI:2140356]
ENSMUSG00000052681	9508.49	0.304478	0.0746598	4.07821	4.53839e-05	0.000436645	RAP1B	RAS related protein 1b [Source:MGI Symbol;Acc:MGI:894315]
ENSMUSG00000040990	2006.79	-0.312945	0.0767443	-4.07777	4.54706e-05	0.000437261	SH3KBP1	SH3-domain kinase binding protein 1 [Source:MGI Symbol;Acc:MGI:1889583]
ENSMUSG00000002329	909.915	0.270076	0.0662401	4.07723	4.55748e-05	0.000438045	MDP1	magnesium-dependent phosphatase 1 [Source:MGI Symbol;Acc:MGI:1915131]
ENSMUSG00000024742	326.761	-0.381822	0.0936825	-4.07571	4.58744e-05	0.000440705	FEN1	flap structure specific endonuclease 1 [Source:MGI Symbol;Acc:MGI:102779]
ENSMUSG00000037331	1560.23	-0.292309	0.0717328	-4.07497	4.6021e-05	0.000441893	LARP1	La ribonucleoprotein domain family, member 1 [Source:MGI Symbol;Acc:MGI:1890165]
ENSMUSG00000038644	326.387	-0.270242	0.0663265	-4.07442	4.61291e-05	0.000442711	POLD1	polymerase (DNA directed), delta 1, catalytic subunit [Source:MGI Symbol;Acc:MGI:97741]
ENSMUSG00000054065	2.77645	0.588403	0.144418	4.0743	4.61529e-05	0.000442719	PKP3	plakophilin 3 [Source:MGI Symbol;Acc:MGI:1891830]
ENSMUSG00000019320	163.88	0.507385	0.124538	4.07415	4.61824e-05	0.000442782	NOXO1	NADPH oxidase organizer 1 [Source:MGI Symbol;Acc:MGI:1919143]
ENSMUSG00000000552	930.551	-0.316136	0.0776261	-4.07255	4.65008e-05	0.000445392	ZFP385A	zinc finger protein 385A [Source:MGI Symbol;Acc:MGI:1352495]
ENSMUSG00000003617	116.97	-0.519567	0.127578	-4.07256	4.64999e-05	0.000445392	CP	ceruloplasmin [Source:MGI Symbol;Acc:MGI:88476]
ENSMUSG00000018507	1684.2	-0.243634	0.0598348	-4.07179	4.6654e-05	0.000446638	TRPV2	transient receptor potential cation channel, subfamily V, member 2 [Source:MGI Symbol;Acc:MGI:1341836]
ENSMUSG00000030117	13.4706	-0.792213	0.194634	-4.07027	4.6958e-05	0.000449325	GDF3	growth differentiation factor 3 [Source:MGI Symbol;Acc:MGI:95686]
ENSMUSG00000025403	431.51	-0.314438	0.077259	-4.06993	4.70275e-05	0.000449545	SHMT2	serine hydroxymethyltransferase 2 (mitochondrial) [Source:MGI Symbol;Acc:MGI:1277989]
ENSMUSG00000041354	3551.14	0.333678	0.081985	4.06998	4.70166e-05	0.000449545	RGL2	ral guanine nucleotide dissociation stimulator-like 2 [Source:MGI Symbol;Acc:MGI:107483]
ENSMUSG00000005682	566.043	0.331068	0.0813608	4.06913	4.71889e-05	0.000450864	PAN2	PAN2 poly(A) specific ribonuclease subunit [Source:MGI Symbol;Acc:MGI:1918984]
ENSMUSG00000027863	1.71005	0.518206	0.127364	4.06869	4.72775e-05	0.000451487	CD2	CD2 antigen [Source:MGI Symbol;Acc:MGI:88320]
ENSMUSG00000063802	366.078	-0.286749	0.070485	-4.06822	4.73729e-05	0.000452174	HSPBP1	HSPA (heat shock 70kDa) binding protein, cytoplasmic cochaperone 1 [Source:MGI Symbol;Acc:MGI:1913495]
ENSMUSG00000054894	231.126	0.369357	0.0907945	4.06806	4.74063e-05	0.00045227	ATP5S	ATP synthase, H+ transporting, mitochondrial F0 complex, subunit S [Source:MGI Symbol;Acc:MGI:1915305]
ENSMUSG00000022089	554.503	0.267004	0.0656502	4.06707	4.76082e-05	0.000453971	BIN3	bridging integrator 3 [Source:MGI Symbol;Acc:MGI:1929883]
ENSMUSG00000030002	917.809	0.323465	0.0795382	4.06679	4.76655e-05	0.000454293	DUSP11	dual specificity phosphatase 11 (RNA/RNP complex 1-interacting) [Source:MGI Symbol;Acc:MGI:1919352]
ENSMUSG00000010097	4117.68	0.3064	0.0753667	4.06546	4.79376e-05	0.000456661	NXF1	nuclear RNA export factor 1 [Source:MGI Symbol;Acc:MGI:1858330]
ENSMUSG00000032123	798.491	-0.270931	0.066648	-4.0651	4.80109e-05	0.000457133	DPAGT1	dolichyl-phosphate (UDP-N-acetylglucosamine) acetylglucosaminephosphotransferase 1 (GlcNAc-1-P transferase) [Source:MGI Symbol;Acc:MGI:1196396]
ENSMUSG00000016308	943.909	0.258607	0.0636515	4.06285	4.84762e-05	0.000461109	UBE2A	ubiquitin-conjugating enzyme E2A [Source:MGI Symbol;Acc:MGI:102959]
ENSMUSG00000023328	193.58	-0.421819	0.103822	-4.06293	4.84613e-05	0.000461109	ACHE	acetylcholinesterase [Source:MGI Symbol;Acc:MGI:87876]
ENSMUSG00000026107	318.962	0.313315	0.0771231	4.06253	4.85433e-05	0.000461293	NABP1	nucleic acid binding protein 1 [Source:MGI Symbol;Acc:MGI:1923258]
ENSMUSG00000105954	1.25111	-0.511274	0.125851	-4.06254	4.85425e-05	0.000461293	GM42793	predicted gene 42793 [Source:MGI Symbol;Acc:MGI:5662930]
ENSMUSG00000024013	11792.6	0.257952	0.063504	4.06198	4.86576e-05	0.000462152	FGD2	FYVE, RhoGEF and PH domain containing 2 [Source:MGI Symbol;Acc:MGI:1347084]
ENSMUSG00000035754	567.449	-0.259697	0.0639676	-4.05982	4.91102e-05	0.000466221	WDR18	WD repeat domain 18 [Source:MGI Symbol;Acc:MGI:2158400]
ENSMUSG00000040552	6029.59	-0.293293	0.0722487	-4.05949	4.91807e-05	0.00046666	C3AR1	complement component 3a receptor 1 [Source:MGI Symbol;Acc:MGI:1097680]
ENSMUSG00000054892	5.69568	0.699161	0.172263	4.05869	4.93488e-05	0.000468025	TXK	TXK tyrosine kinase [Source:MGI Symbol;Acc:MGI:102960]
ENSMUSG00000057531	765.114	-0.268068	0.0660547	-4.05828	4.94356e-05	0.000468618	DTNBP1	dystrobrevin binding protein 1 [Source:MGI Symbol;Acc:MGI:2137586]
ENSMUSG00000026843	606.054	-0.328893	0.0810489	-4.05796	4.9504e-05	0.000469036	FUBP3	far upstream element (FUSE) binding protein 3 [Source:MGI Symbol;Acc:MGI:2443699]
ENSMUSG00000020212	79.8181	0.55402	0.136539	4.0576	4.95806e-05	0.000469532	MDM1	transformed mouse 3T3 cell double minute 1 [Source:MGI Symbol;Acc:MGI:96951]
ENSMUSG00000060012	171.547	-0.46366	0.114298	-4.05658	4.97966e-05	0.000471346	KIF13B	kinesin family member 13B [Source:MGI Symbol;Acc:MGI:1098265]
ENSMUSG00000001855	935.045	-0.349642	0.0861971	-4.05631	4.98532e-05	0.000471651	NUP214	nucleoporin 214 [Source:MGI Symbol;Acc:MGI:1095411]
ENSMUSG00000024346	233.981	0.397554	0.0980167	4.05598	4.99241e-05	0.000472072	PFDN1	prefoldin 1 [Source:MGI Symbol;Acc:MGI:1914449]
ENSMUSG00000070501	21.6727	-0.752404	0.18551	-4.05588	4.99467e-05	0.000472072	IFI214	interferon activated gene 214 [Source:MGI Symbol;Acc:MGI:3584522]
ENSMUSG00000020238	2574.5	-0.23765	0.0586055	-4.05508	5.01171e-05	0.000473451	NCLN	nicalin [Source:MGI Symbol;Acc:MGI:1926081]
[truncated: 3,039 more rows]

## Sheet: BaseMean > 4, FC > 30%
gene	baseMean	log2FoldChange	lfcSE	stat	pvalue	padj	name	description	FC
ENSMUSG00000021782	93.7799	-3.38845	0.182867	-18.5296	1.19161e-76	2.87476e-73	DLG5	discs, large homolog 5 (Drosophila) [Source:MGI Symbol;Acc:MGI:1918478]	0.0954938
ENSMUSG00000042529	196.76	-3.25568	0.142827	-22.7945	5.19601e-115	3.34277e-111	KCNJ12	potassium inwardly-rectifying channel, subfamily J, member 12 [Source:MGI Symbol;Acc:MGI:108495]	0.104699
ENSMUSG00000040612	541.863	-3.25469	0.106223	-30.6402	3.56883e-206	6.88784e-202	ILDR2	immunoglobulin-like domain containing receptor 2 [Source:MGI Symbol;Acc:MGI:1196370]	0.104771
ENSMUSG00000024529	60.591	-2.84227	0.174683	-16.271	1.58582e-59	2.18616e-56	LOX	lysyl oxidase [Source:MGI Symbol;Acc:MGI:96817]	0.139442
ENSMUSG00000015843	97.3013	-2.47284	0.172952	-14.2979	2.25651e-46	1.50175e-43	RXRG	retinoid X receptor gamma [Source:MGI Symbol;Acc:MGI:98216]	0.180136
ENSMUSG00000029304	343.559	-2.3743	0.15043	-15.7834	4.04682e-56	4.11072e-53	SPP1	secreted phosphoprotein 1 [Source:MGI Symbol;Acc:MGI:98389]	0.192869
ENSMUSG00000001120	77.8067	-2.37117	0.14631	-16.2064	4.54466e-59	5.48199e-56	PCBP3	poly(rC) binding protein 3 [Source:MGI Symbol;Acc:MGI:1890470]	0.193289
ENSMUSG00000050370	76.3047	-2.3206	0.18725	-12.3931	2.84858e-35	1.0181e-32	CH25H	cholesterol 25-hydroxylase [Source:MGI Symbol;Acc:MGI:1333869]	0.200184
ENSMUSG00000045502	309.314	-2.27495	0.125141	-18.1791	7.56301e-74	1.62185e-70	HCAR2	hydroxycarboxylic acid receptor 2 [Source:MGI Symbol;Acc:MGI:1933383]	0.20662
ENSMUSG00000022505	146.712	-2.25389	0.172304	-13.0809	4.23236e-39	1.89964e-36	EMP2	epithelial membrane protein 2 [Source:MGI Symbol;Acc:MGI:1098726]	0.209658
ENSMUSG00000047238	100.16	-2.20378	0.173705	-12.6869	6.99201e-37	3.06695e-34	MAGEH1	melanoma antigen, family H, 1 [Source:MGI Symbol;Acc:MGI:1922875]	0.217068
ENSMUSG00000030757	82.963	-2.17788	0.178282	-12.216	2.55459e-34	8.5006e-32	ZKSCAN2	zinc finger with KRAB and SCAN domains 2 [Source:MGI Symbol;Acc:MGI:2444060]	0.221
ENSMUSG00000028362	149.398	-2.10299	0.130833	-16.0738	3.89699e-58	4.42423e-55	TNFSF8	tumor necrosis factor (ligand) superfamily, member 8 [Source:MGI Symbol;Acc:MGI:88328]	0.232776
ENSMUSG00000025854	367.406	-2.09529	0.106616	-19.6528	5.47569e-86	1.50973e-82	FAM20C	family with sequence similarity 20, member C [Source:MGI Symbol;Acc:MGI:2136853]	0.234021
ENSMUSG00000033350	195.783	-2.04912	0.140218	-14.6138	2.29338e-48	1.70239e-45	CHST2	carbohydrate sulfotransferase 2 [Source:MGI Symbol;Acc:MGI:1891160]	0.241631
ENSMUSG00000073409	318.938	-2.00418	0.112389	-17.8326	3.94634e-71	7.61643e-68	H2-Q6	histocompatibility 2, Q region locus 6 [Source:MGI Symbol;Acc:MGI:95935]	0.249276
ENSMUSG00000043943	1137.24	-1.9839	0.0892884	-22.2191	2.2477e-109	8.67611e-106	NAALAD2	N-acetylated alpha-linked acidic dipeptidase 2 [Source:MGI Symbol;Acc:MGI:1919810]	0.252805
ENSMUSG00000073555	124.248	-1.92871	0.143966	-13.397	6.29539e-41	3.1974e-38	GM4951	predicted gene 4951 [Source:MGI Symbol;Acc:MGI:3644953]	0.262664
ENSMUSG00000003418	524.763	-1.86726	0.140037	-13.334	1.46822e-40	7.08416e-38	ST8SIA6	ST8 alpha-N-acetyl-neuraminide alpha-2,8-sialyltransferase 6 [Source:MGI Symbol;Acc:MGI:2386797]	0.274094
ENSMUSG00000026285	263.842	-1.80255	0.159567	-11.2965	1.36547e-29	3.17514e-27	PDCD1	programmed cell death 1 [Source:MGI Symbol;Acc:MGI:104879]	0.286668
ENSMUSG00000002602	1190.15	-1.791	0.104537	-17.1326	8.47112e-66	1.4863e-62	AXL	AXL receptor tyrosine kinase [Source:MGI Symbol;Acc:MGI:1347244]	0.288972
ENSMUSG00000068129	267.492	-1.76382	0.13332	-13.23	5.89141e-40	2.70724e-37	CST7	cystatin F (leukocystatin) [Source:MGI Symbol;Acc:MGI:1298217]	0.294468
ENSMUSG00000048126	517.005	-1.73966	0.169858	-10.2419	1.28701e-24	2.48393e-22	COL6A3	collagen, type VI, alpha 3 [Source:MGI Symbol;Acc:MGI:88461]	0.299439
ENSMUSG00000020083	21.6457	-1.73137	0.184079	-9.4056	5.17325e-21	7.13169e-19	2010107G23RIK	RIKEN cDNA 2010107G23 gene [Source:MGI Symbol;Acc:MGI:1917144]	0.301165
ENSMUSG00000033082	51.7861	-1.68769	0.188501	-8.95325	3.4517e-19	3.83834e-17	CLEC1A	C-type lectin domain family 1, member a [Source:MGI Symbol;Acc:MGI:2444151]	0.310423
ENSMUSG00000068036	148.364	-1.65998	0.159394	-10.4144	2.13226e-25	4.28674e-23	AFDN	afadin, adherens junction formation factor [Source:MGI Symbol;Acc:MGI:1314653]	0.316443
ENSMUSG00000030577	404.146	-1.65443	0.113299	-14.6023	2.71564e-48	1.94118e-45	CD22	CD22 antigen [Source:MGI Symbol;Acc:MGI:88322]	0.317663
ENSMUSG00000023078	31.1644	-1.62974	0.190861	-8.5389	1.35504e-17	1.32837e-15	CXCL13	chemokine (C-X-C motif) ligand 13 [Source:MGI Symbol;Acc:MGI:1888499]	0.323146
ENSMUSG00000028518	54.7861	-1.58975	0.194213	-8.18559	2.70962e-16	2.30377e-14	PRKAA2	protein kinase, AMP-activated, alpha 2 catalytic subunit [Source:MGI Symbol;Acc:MGI:1336173]	0.33223
ENSMUSG00000033467	576.567	-1.58904	0.108559	-14.6375	1.61828e-48	1.24931e-45	CRLF2	cytokine receptor-like factor 2 [Source:MGI Symbol;Acc:MGI:1889506]	0.332392
ENSMUSG00000031995	552.93	-1.56915	0.0695206	-22.571	8.35113e-113	4.02942e-109	ST14	suppression of tumorigenicity 14 (colon carcinoma) [Source:MGI Symbol;Acc:MGI:1338881]	0.337007
ENSMUSG00000027962	417.102	-1.54519	0.125578	-12.3046	8.55949e-35	2.89821e-32	VCAM1	vascular cell adhesion molecule 1 [Source:MGI Symbol;Acc:MGI:98926]	0.342651
ENSMUSG00000073418	536.356	-1.5076	0.125837	-11.9806	4.49098e-33	1.31327e-30	C4B	complement component 4B (Chido blood group) [Source:MGI Symbol;Acc:MGI:88228]	0.351695
ENSMUSG00000040537	104.65	-1.50504	0.161094	-9.34263	9.39747e-21	1.25084e-18	ADAM22	a disintegrin and metallopeptidase domain 22 [Source:MGI Symbol;Acc:MGI:1340046]	0.352321
ENSMUSG00000021508	25.5818	-1.50393	0.178946	-8.40435	4.30223e-17	3.95396e-15	CXCL14	chemokine (C-X-C motif) ligand 14 [Source:MGI Symbol;Acc:MGI:1888514]	0.352592
ENSMUSG00000031327	42.8273	-1.46853	0.193807	-7.57726	3.52916e-14	2.42394e-12	CHIC1	cysteine-rich hydrophobic domain 1 [Source:MGI Symbol;Acc:MGI:1344694]	0.361351
ENSMUSG00000044678	28.6324	-1.46847	0.18964	-7.74346	9.67468e-15	6.99331e-13	LY6K	lymphocyte antigen 6 complex, locus K [Source:MGI Symbol;Acc:MGI:1923736]	0.361365
ENSMUSG00000029561	265.409	-1.46339	0.140664	-10.4034	2.39155e-25	4.75845e-23	OASL2	2'-5' oligoadenylate synthetase-like 2 [Source:MGI Symbol;Acc:MGI:1344390]	0.362641
ENSMUSG00000051065	44.8583	-1.46153	0.185691	-7.87078	3.52434e-15	2.65702e-13	MB21D2	Mab-21 domain containing 2 [Source:MGI Symbol;Acc:MGI:1917028]	0.363108
ENSMUSG00000004707	905.75	-1.44374	0.0974367	-14.8172	1.13484e-49	9.95562e-47	LY9	lymphocyte antigen 9 [Source:MGI Symbol;Acc:MGI:96885]	0.367614
ENSMUSG00000031497	257.912	-1.4359	0.10541	-13.622	2.96367e-42	1.63425e-39	TNFSF13B	tumor necrosis factor (ligand) superfamily, member 13b [Source:MGI Symbol;Acc:MGI:1344376]	0.369616
ENSMUSG00000098108	76.5379	-1.4304	0.158427	-9.02879	1.73585e-19	2.00875e-17	GM27008	predicted gene, 27008 [Source:MGI Symbol;Acc:MGI:5504123]	0.371028
ENSMUSG00000034855	95.0376	-1.42769	0.169782	-8.40895	4.13705e-17	3.82034e-15	CXCL10	chemokine (C-X-C motif) ligand 10 [Source:MGI Symbol;Acc:MGI:1352450]	0.371725
ENSMUSG00000104713	38.125	-1.42489	0.179862	-7.92215	2.33431e-15	1.80209e-13	GBP6	guanylate binding protein 6 [Source:MGI Symbol;Acc:MGI:2140937]	0.372447
ENSMUSG00000030653	1635.26	-1.41768	0.177758	-7.97535	1.51946e-15	1.20187e-13	GM45837	predicted gene 45837 [Source:MGI Symbol;Acc:MGI:5804952]	0.374314
ENSMUSG00000022887	72.5646	-1.4022	0.139003	-10.0876	6.27123e-24	1.11041e-21	MASP1	mannan-binding lectin serine peptidase 1 [Source:MGI Symbol;Acc:MGI:88492]	0.378352
ENSMUSG00000103332	147.385	-1.39231	0.155656	-8.94479	3.72644e-19	4.06329e-17	PCDHGA2	protocadherin gamma subfamily A, 2 [Source:MGI Symbol;Acc:MGI:1935214]	0.380954
ENSMUSG00000035274	10.6599	-1.38805	0.191091	-7.26385	3.76218e-13	2.28334e-11	TPBG	trophoblast glycoprotein [Source:MGI Symbol;Acc:MGI:1341264]	0.38208
ENSMUSG00000062488	90.8382	-1.35328	0.160585	-8.4272	3.54031e-17	3.3169e-15	IFIT3B	interferon-induced protein with tetratricopeptide repeats 3B [Source:MGI Symbol;Acc:MGI:3698419]	0.391401
ENSMUSG00000025586	19.1085	-1.35223	0.187106	-7.22706	4.93557e-13	2.90416e-11	CPEB1	cytoplasmic polyadenylation element binding protein 1 [Source:MGI Symbol;Acc:MGI:108442]	0.391687
ENSMUSG00000074896	397.07	-1.35047	0.13348	-10.1174	4.62727e-24	8.34639e-22	IFIT3	interferon-induced protein with tetratricopeptide repeats 3 [Source:MGI Symbol;Acc:MGI:1101055]	0.392164
ENSMUSG00000025092	128.523	-1.3369	0.130142	-10.2727	9.35848e-25	1.82443e-22	HSPA12A	heat shock protein 12A [Source:MGI Symbol;Acc:MGI:1920692]	0.39587
ENSMUSG00000045932	314.123	-1.33058	0.149195	-8.91841	4.73035e-19	5.10033e-17	IFIT2	interferon-induced protein with tetratricopeptide repeats 2 [Source:MGI Symbol;Acc:MGI:99449]	0.397608
ENSMUSG00000097194	35.1406	-1.32902	0.19276	-6.89467	5.39917e-12	2.67876e-10	9330175E14RIK	RIKEN cDNA 9330175E14 gene [Source:MGI Symbol;Acc:MGI:2443913]	0.398039
ENSMUSG00000022756	75.7114	-1.31748	0.146349	-9.0023	2.2103e-19	2.50934e-17	SLC7A4	solute carrier family 7 (cationic amino acid transporter, y+ system), member 4 [Source:MGI Symbol;Acc:MGI:2146512]	0.401237
ENSMUSG00000079457	7.98288	-1.31427	0.18788	-6.99527	2.64749e-12	1.39227e-10	GM7609	predicted pseudogene 7609 [Source:MGI Symbol;Acc:MGI:3644536]	0.402128
ENSMUSG00000049723	85.5782	-1.31375	0.194721	-6.74685	1.51089e-11	6.95946e-10	MMP12	matrix metallopeptidase 12 [Source:MGI Symbol;Acc:MGI:97005]	0.402273
ENSMUSG00000025743	2205.26	-1.30862	0.114313	-11.4476	2.41621e-30	5.8291e-28	SDC3	syndecan 3 [Source:MGI Symbol;Acc:MGI:1349163]	0.403707
ENSMUSG00000044708	24.9876	-1.3028	0.18111	-7.19345	6.31755e-13	3.66152e-11	KCNJ10	potassium inwardly-rectifying channel, subfamily J, member 10 [Source:MGI Symbol;Acc:MGI:1194504]	0.405338
ENSMUSG00000027661	55.6177	-1.29312	0.18541	-6.97438	3.07225e-12	1.57698e-10	SLC2A10	solute carrier family 2 (facilitated glucose transporter), member 10 [Source:MGI Symbol;Acc:MGI:2156687]	0.408068
ENSMUSG00000015568	801.611	-1.28984	0.107416	-12.0078	3.23178e-33	9.59589e-31	LPL	lipoprotein lipase [Source:MGI Symbol;Acc:MGI:96820]	0.408996
ENSMUSG00000032860	31.3013	-1.28205	0.189357	-6.77057	1.28276e-11	5.95127e-10	P2RY2	purinergic receptor P2Y, G-protein coupled 2 [Source:MGI Symbol;Acc:MGI:105107]	0.41121
ENSMUSG00000042873	26.3111	-1.28024	0.179451	-7.13416	9.73783e-13	5.49339e-11	LHFPL4	lipoma HMGIC fusion partner-like protein 4 [Source:MGI Symbol;Acc:MGI:3057108]	0.411728
ENSMUSG00000056215	54.9421	-1.27858	0.190578	-6.70893	1.96052e-11	8.84068e-10	LRGUK	leucine-rich repeats and guanylate kinase domain containing [Source:MGI Symbol;Acc:MGI:1921604]	0.412202
ENSMUSG00000037849	59.655	-1.2561	0.186648	-6.72978	1.69918e-11	7.71629e-10	IFI206	interferon activated gene 206 [Source:MGI Symbol;Acc:MGI:3646410]	0.418674
ENSMUSG00000008206	97.5554	-1.23272	0.167661	-7.35246	1.94588e-13	1.22331e-11	CERS4	ceramide synthase 4 [Source:MGI Symbol;Acc:MGI:1914510]	0.425514
ENSMUSG00000020811	382.028	-1.23166	0.109596	-11.2382	2.64791e-29	6.08388e-27	WSCD1	WSC domain containing 1 [Source:MGI Symbol;Acc:MGI:2448493]	0.425827
ENSMUSG00000038026	112.861	-1.22898	0.139399	-8.81623	1.18377e-18	1.22832e-16	KCNJ9	potassium inwardly-rectifying channel, subfamily J, member 9 [Source:MGI Symbol;Acc:MGI:108007]	0.426619
ENSMUSG00000040907	340.166	-1.22491	0.124183	-9.86372	5.97912e-23	9.863e-21	ATP1A3	ATPase, Na+/K+ transporting, alpha 3 polypeptide [Source:MGI Symbol;Acc:MGI:88107]	0.427825
ENSMUSG00000028037	23.9142	-1.22285	0.191331	-6.39126	1.64529e-10	6.25081e-09	IFI44	interferon-induced protein 44 [Source:MGI Symbol;Acc:MGI:2443016]	0.428437
ENSMUSG00000060550	322.787	-1.212	0.135658	-8.93419	4.10155e-19	4.44718e-17	H2-Q7	histocompatibility 2, Q region locus 7 [Source:MGI Symbol;Acc:MGI:95936]	0.431671
ENSMUSG00000058317	46.8222	-1.20966	0.173149	-6.98625	2.82335e-12	1.46875e-10	UBE2E2	ubiquitin-conjugating enzyme E2E 2 [Source:MGI Symbol;Acc:MGI:2384997]	0.432371
ENSMUSG00000027376	30.265	-1.2029	0.192366	-6.25315	4.02245e-10	1.41409e-08	PROM2	prominin 2 [Source:MGI Symbol;Acc:MGI:2138997]	0.434403
ENSMUSG00000030107	239.621	-1.19932	0.148753	-8.06251	7.47424e-16	6.08661e-14	USP18	ubiquitin specific peptidase 18 [Source:MGI Symbol;Acc:MGI:1344364]	0.435479
ENSMUSG00000014158	201.912	-1.1951	0.133518	-8.95087	3.52682e-19	3.88958e-17	TRPV4	transient receptor potential cation channel, subfamily V, member 4 [Source:MGI Symbol;Acc:MGI:1926945]	0.436755
ENSMUSG00000070526	13.9547	-1.19026	0.184636	-6.44652	1.14451e-10	4.51718e-09	PEG12	paternally expressed 12 [Source:MGI Symbol;Acc:MGI:1351637]	0.438223
ENSMUSG00000027457	215.601	-1.1841	0.129663	-9.13211	6.718e-20	8.00354e-18	SNPH	syntaphilin [Source:MGI Symbol;Acc:MGI:2139270]	0.440099
ENSMUSG00000022246	39.5704	-1.17755	0.184997	-6.36521	1.95018e-10	7.28168e-09	RAI14	retinoic acid induced 14 [Source:MGI Symbol;Acc:MGI:1922896]	0.442102
ENSMUSG00000009214	400.029	-1.16745	0.108255	-10.7843	4.08321e-27	8.56586e-25	TMEM8C	transmembrane protein 8C [Source:MGI Symbol;Acc:MGI:1913389]	0.445206
ENSMUSG00000020641	75.3268	-1.16472	0.162998	-7.14561	8.9596e-13	5.08589e-11	RSAD2	radical S-adenosyl methionine domain containing 2 [Source:MGI Symbol;Acc:MGI:1929628]	0.446051
ENSMUSG00000089797	131.936	-1.16268	0.114318	-10.1706	2.68348e-24	5.12783e-22	GM16118	predicted gene 16118 [Source:MGI Symbol;Acc:MGI:3801926]	0.446683
ENSMUSG00000029648	29.4414	-1.15617	0.194609	-5.94097	2.83347e-09	8.33628e-08	FLT1	FMS-like tyrosine kinase 1 [Source:MGI Symbol;Acc:MGI:95558]	0.448704
ENSMUSG00000030789	212.944	-1.15253	0.123263	-9.35013	8.75439e-21	1.17333e-18	ITGAX	integrin alpha X [Source:MGI Symbol;Acc:MGI:96609]	0.449836
ENSMUSG00000031144	75.3236	-1.14787	0.162063	-7.08285	1.41217e-12	7.85444e-11	SYP	synaptophysin [Source:MGI Symbol;Acc:MGI:98467]	0.451291
ENSMUSG00000018800	15.2028	-1.13626	0.194419	-5.84437	5.08493e-09	1.41819e-07	ABCA5	ATP-binding cassette, sub-family A (ABC1), member 5 [Source:MGI Symbol;Acc:MGI:2386607]	0.454938
ENSMUSG00000032690	87.4535	-1.13571	0.168006	-6.7599	1.38087e-11	6.37579e-10	OAS2	2'-5' oligoadenylate synthetase 2 [Source:MGI Symbol;Acc:MGI:2180852]	0.455112
ENSMUSG00000004891	52.7552	-1.12882	0.160128	-7.04949	1.79579e-12	9.79063e-11	NES	nestin [Source:MGI Symbol;Acc:MGI:101784]	0.45729
ENSMUSG00000014599	543.268	-1.12384	0.117079	-9.59902	8.07119e-22	1.19826e-19	CSF1	colony stimulating factor 1 (macrophage) [Source:MGI Symbol;Acc:MGI:1339753]	0.458871
ENSMUSG00000031827	1407.77	-1.1225	0.194077	-5.7838	7.30305e-09	1.96308e-07	COTL1	coactosin-like 1 (Dictyostelium) [Source:MGI Symbol;Acc:MGI:1919292]	0.459296
ENSMUSG00000033880	4011.4	-1.11944	0.0890772	-12.5671	3.2044e-36	1.2369e-33	LGALS3BP	lectin, galactoside-binding, soluble, 3 binding protein [Source:MGI Symbol;Acc:MGI:99554]	0.460273
ENSMUSG00000029816	22.6963	-1.11821	0.184255	-6.0688	1.2887e-09	4.07735e-08	GPNMB	glycoprotein (transmembrane) nmb [Source:MGI Symbol;Acc:MGI:1934765]	0.460666
ENSMUSG00000104918	383.812	-1.1152	0.0802731	-13.8926	7.02383e-44	4.23625e-41	GM42944	predicted gene 42944 [Source:MGI Symbol;Acc:MGI:5663081]	0.461626
ENSMUSG00000027221	774.431	-1.11318	0.113132	-9.8396	7.60146e-23	1.24329e-20	CHST1	carbohydrate (keratan sulfate Gal-6) sulfotransferase 1 [Source:MGI Symbol;Acc:MGI:1924219]	0.462275
ENSMUSG00000036218	27.2566	-1.11054	0.190367	-5.83367	5.42202e-09	1.49921e-07	PDZRN4	PDZ domain containing RING finger 4 [Source:MGI Symbol;Acc:MGI:3056996]	0.463122
ENSMUSG00000029126	11.1069	-1.10169	0.193445	-5.69511	1.23293e-08	3.17918e-07	NSG1	neuron specific gene family member 1 [Source:MGI Symbol;Acc:MGI:109149]	0.465969
ENSMUSG00000090942	20.8513	-1.10053	0.194047	-5.67146	1.41584e-08	3.60974e-07	F830016B08RIK	RIKEN cDNA F830016B08 gene [Source:MGI Symbol;Acc:MGI:3588218]	0.466344
ENSMUSG00000049436	3437.79	-1.09912	0.067336	-16.3229	6.78672e-60	1.00757e-56	UPK1B	uroplakin 1B [Source:MGI Symbol;Acc:MGI:98912]	0.466802
ENSMUSG00000037032	195.635	-1.09658	0.102275	-10.7219	8.03418e-27	1.64957e-24	APBB1	amyloid beta (A4) precursor protein-binding, family B, member 1 [Source:MGI Symbol;Acc:MGI:107765]	0.467622
ENSMUSG00000054945	54.6876	-1.09522	0.136634	-8.01566	1.09545e-15	8.80925e-14	GM9958	predicted gene 9958 [Source:MGI Symbol;Acc:MGI:3641866]	0.468066
ENSMUSG00000030329	8.07643	-1.09501	0.188476	-5.8098	6.25457e-09	1.70499e-07	PIANP	PILR alpha associated neural protein [Source:MGI Symbol;Acc:MGI:2441908]	0.468133
ENSMUSG00000030785	49.2133	-1.09448	0.165566	-6.61055	3.82897e-11	1.63133e-09	COX6A2	cytochrome c oxidase subunit VIa polypeptide 2 [Source:MGI Symbol;Acc:MGI:104649]	0.468305
ENSMUSG00000006576	26.4892	-1.08926	0.194527	-5.59954	2.1492e-08	5.23071e-07	SLC4A3	solute carrier family 4 (anion exchanger), member 3 [Source:MGI Symbol;Acc:MGI:109350]	0.470002
ENSMUSG00000066861	57.8444	-1.08917	0.188815	-5.76846	7.99984e-09	2.13256e-07	OAS1G	2'-5' oligoadenylate synthetase 1G [Source:MGI Symbol;Acc:MGI:97429]	0.470032
ENSMUSG00000033900	12.2006	-1.08847	0.193147	-5.63546	1.74588e-08	4.35341e-07	MAP9	microtubule-associated protein 9 [Source:MGI Symbol;Acc:MGI:2442208]	0.470259
ENSMUSG00000034459	99.481	-1.08756	0.155505	-6.99376	2.67623e-12	1.40357e-10	IFIT1	interferon-induced protein with tetratricopeptide repeats 1 [Source:MGI Symbol;Acc:MGI:99450]	0.470555
ENSMUSG00000103677	144.098	-1.07059	0.160616	-6.66554	2.63698e-11	1.16195e-09	PCDHGA4	protocadherin gamma subfamily A, 4 [Source:MGI Symbol;Acc:MGI:1935216]	0.476124
ENSMUSG00000079499	103.256	-1.0693	0.137304	-7.78782	6.81733e-15	4.96508e-13	6530402F18RIK	RIKEN cDNA 6530402F18 gene [Source:MGI Symbol;Acc:MGI:1923470]	0.47655
ENSMUSG00000020310	6.30083	-1.06873	0.177512	-6.02061	1.73766e-09	5.39942e-08	MADCAM1	mucosal vascular addressin cell adhesion molecule 1 [Source:MGI Symbol;Acc:MGI:103579]	0.476738
ENSMUSG00000030162	30.1175	-1.05724	0.186922	-5.65606	1.54888e-08	3.91275e-07	OLR1	oxidized low density lipoprotein (lectin-like) receptor 1 [Source:MGI Symbol;Acc:MGI:1261434]	0.480549
ENSMUSG00000021779	22.534	-1.05618	0.194731	-5.42379	5.83486e-08	1.29287e-06	THRB	thyroid hormone receptor beta [Source:MGI Symbol;Acc:MGI:98743]	0.480903
ENSMUSG00000097224	40.9621	-1.04779	0.157018	-6.67306	2.5052e-11	1.10642e-09	GM26716	predicted gene, 26716 [Source:MGI Symbol;Acc:MGI:5477210]	0.483708
ENSMUSG00000100213	38.5048	-1.04296	0.162863	-6.40392	1.51437e-10	5.78759e-09	GM28151	predicted gene 28151 [Source:MGI Symbol;Acc:MGI:5578857]	0.485329
ENSMUSG00000096802	8.21575	-1.04141	0.184228	-5.65283	1.57825e-08	3.97653e-07	GM15433	predicted pseudogene 15433 [Source:MGI Symbol;Acc:MGI:3705860]	0.485852
ENSMUSG00000047959	106.025	-1.03749	0.122108	-8.49652	1.95367e-17	1.87591e-15	KCNA3	potassium voltage-gated channel, shaker-related subfamily, member 3 [Source:MGI Symbol;Acc:MGI:96660]	0.487174
ENSMUSG00000041695	600.372	-1.03727	0.113017	-9.17805	4.38951e-20	5.43061e-18	KCNJ2	potassium inwardly-rectifying channel, subfamily J, member 2 [Source:MGI Symbol;Acc:MGI:104744]	0.487247
ENSMUSG00000070407	155.391	-1.03567	0.140962	-7.34712	2.02529e-13	1.26091e-11	HS3ST3B1	heparan sulfate (glucosamine) 3-O-sulfotransferase 3B1 [Source:MGI Symbol;Acc:MGI:1333853]	0.487791
ENSMUSG00000072109	38.6806	-1.0347	0.187994	-5.50387	3.71552e-08	8.58796e-07	A530040E14RIK	RIKEN cDNA A530040E14 gene [Source:MGI Symbol;Acc:MGI:3612703]	0.488119
ENSMUSG00000052688	56.1706	-1.02852	0.179571	-5.72762	1.01849e-08	2.66814e-07	RAB7B	RAB7B, member RAS oncogene family [Source:MGI Symbol;Acc:MGI:2442295]	0.490214
ENSMUSG00000062545	1400.88	-1.02766	0.0879296	-11.6873	1.48072e-31	3.81037e-29	TLR12	toll-like receptor 12 [Source:MGI Symbol;Acc:MGI:3045221]	0.490506
ENSMUSG00000030088	28.4896	-1.02133	0.185828	-5.49612	3.88235e-08	8.93079e-07	ALDH1L1	aldehyde dehydrogenase 1 family, member L1 [Source:MGI Symbol;Acc:MGI:1340024]	0.492661
ENSMUSG00000070527	42.1429	-1.02061	0.178124	-5.72981	1.00543e-08	2.64011e-07	MKRN3	makorin, ring finger protein, 3 [Source:MGI Symbol;Acc:MGI:2181178]	0.492907
ENSMUSG00000102748	572.537	-1.02029	0.119005	-8.57346	1.00424e-17	9.93941e-16	PCDHGB2	protocadherin gamma subfamily B, 2 [Source:MGI Symbol;Acc:MGI:1935170]	0.493019
ENSMUSG00000056145	21.7653	-1.01411	0.188948	-5.36713	7.99985e-08	1.6911e-06	AI504432	expressed sequence AI504432 [Source:MGI Symbol;Acc:MGI:2139742]	0.495134
ENSMUSG00000025876	64.0742	-1.01271	0.170079	-5.95439	2.61052e-09	7.75122e-08	UNC5A	unc-5 netrin receptor A [Source:MGI Symbol;Acc:MGI:894682]	0.495613
ENSMUSG00000024044	469.385	-1.01114	0.105924	-9.54593	1.34897e-21	1.92853e-19	EPB41L3	erythrocyte membrane protein band 4.1 like 3 [Source:MGI Symbol;Acc:MGI:103008]	0.496153
ENSMUSG00000036904	139.053	-1.00832	0.11168	-9.02864	1.73814e-19	2.00875e-17	FZD8	frizzled class receptor 8 [Source:MGI Symbol;Acc:MGI:108460]	0.497126
ENSMUSG00000066456	130.006	-1.00723	0.11333	-8.88765	6.24163e-19	6.5827e-17	HMGN3	high mobility group nucleosomal binding domain 3 [Source:MGI Symbol;Acc:MGI:2138069]	0.497499
ENSMUSG00000062082	33.3559	-0.999284	0.170019	-5.87748	4.16556e-09	1.17882e-07	CD200R4	CD200 receptor 4 [Source:MGI Symbol;Acc:MGI:3036289]	0.500248
ENSMUSG00000105345	16.801	-0.995709	0.194717	-5.11361	3.16063e-07	5.87443e-06	BC030343	cDNA sequence BC030343 [Source:MGI Symbol;Acc:MGI:2679267]	0.50149
ENSMUSG00000036564	63.809	-0.991131	0.188041	-5.27083	1.35812e-07	2.72977e-06	NDRG4	N-myc downstream regulated gene 4 [Source:MGI Symbol;Acc:MGI:2384590]	0.503083
ENSMUSG00000074151	136.03	-0.986193	0.131343	-7.50852	5.97974e-14	3.95236e-12	NLRC5	NLR family, CARD domain containing 5 [Source:MGI Symbol;Acc:MGI:3612191]	0.504808
ENSMUSG00000039899	548.199	-0.976985	0.104024	-9.39192	5.89182e-21	8.00789e-19	FGL2	fibrinogen-like protein 2 [Source:MGI Symbol;Acc:MGI:103266]	0.50804
ENSMUSG00000039942	60.8125	-0.973804	0.16608	-5.86347	4.53284e-09	1.27714e-07	PTGER4	prostaglandin E receptor 4 (subtype EP4) [Source:MGI Symbol;Acc:MGI:104311]	0.509162
ENSMUSG00000056367	13.8876	-0.973584	0.188909	-5.15371	2.55381e-07	4.87002e-06	ACTR3B	ARP3 actin-related protein 3B [Source:MGI Symbol;Acc:MGI:2661120]	0.50924
ENSMUSG00000026825	22.6709	-0.973171	0.193963	-5.01729	5.24062e-07	9.13944e-06	DNM1	dynamin 1 [Source:MGI Symbol;Acc:MGI:107384]	0.509385
ENSMUSG00000028597	11.4228	-0.970547	0.194643	-4.9863	6.15468e-07	1.05587e-05	GPX7	glutathione peroxidase 7 [Source:MGI Symbol;Acc:MGI:1914555]	0.510313
ENSMUSG00000038390	47.7206	-0.96958	0.140001	-6.92554	4.34311e-12	2.18287e-10	GPR162	G protein-coupled receptor 162 [Source:MGI Symbol;Acc:MGI:1315214]	0.510655
ENSMUSG00000073411	16664.8	-0.967422	0.0809324	-11.9535	6.22773e-33	1.76758e-30	H2-D1	histocompatibility 2, D region locus 1 [Source:MGI Symbol;Acc:MGI:95896]	0.511419
ENSMUSG00000068758	21.0798	-0.966427	0.181846	-5.31455	1.06923e-07	2.20472e-06	IL3RA	interleukin 3 receptor, alpha chain [Source:MGI Symbol;Acc:MGI:96553]	0.511772
ENSMUSG00000020695	887.062	-0.965501	0.10607	-9.10246	8.83078e-20	1.03923e-17	MRC2	mannose receptor, C type 2 [Source:MGI Symbol;Acc:MGI:107818]	0.512101
ENSMUSG00000104761	103.589	-0.964555	0.139342	-6.9222	4.44683e-12	2.22341e-10	GM43511	predicted gene 43511 [Source:MGI Symbol;Acc:MGI:5663648]	0.512437
ENSMUSG00000073489	315.838	-0.963228	0.123574	-7.79477	6.45281e-15	4.73533e-13	IFI204	interferon activated gene 204 [Source:MGI Symbol;Acc:MGI:96429]	0.512908
ENSMUSG00000016496	252.064	-0.958719	0.114147	-8.39898	4.50361e-17	4.11942e-15	CD274	CD274 antigen [Source:MGI Symbol;Acc:MGI:1926446]	0.514514
ENSMUSG00000079445	105.701	-0.95867	0.163175	-5.8751	4.22594e-09	1.19415e-07	B3GNT7	UDP-GlcNAc:betaGal beta-1,3-N-acetylglucosaminyltransferase 7 [Source:MGI Symbol;Acc:MGI:2384394]	0.514531
ENSMUSG00000022610	24.2984	-0.953342	0.180266	-5.28852	1.23311e-07	2.49989e-06	MAPK12	mitogen-activated protein kinase 12 [Source:MGI Symbol;Acc:MGI:1353438]	0.516435
ENSMUSG00000072825	11.3317	-0.950586	0.194497	-4.8874	1.02176e-06	1.6288e-05	CEP170B	centrosomal protein 170B [Source:MGI Symbol;Acc:MGI:2145043]	0.517422
ENSMUSG00000085915	4.88918	-0.948578	0.192858	-4.91853	8.71944e-07	1.42494e-05	GM8091	predicted gene 8091 [Source:MGI Symbol;Acc:MGI:3643169]	0.518143
ENSMUSG00000044867	31.6127	-0.942148	0.170801	-5.51605	3.46705e-08	8.08141e-07	GIMAP1OS	GTPase, IMAP family member 1, opposite strand [Source:MGI Symbol;Acc:MGI:3781523]	0.520457
ENSMUSG00000041827	32.8024	-0.924511	0.194595	-4.75095	2.02458e-06	2.95215e-05	OASL1	2'-5' oligoadenylate synthetase-like 1 [Source:MGI Symbol;Acc:MGI:2180849]	0.526859
ENSMUSG00000105004	53.2927	-0.918763	0.163413	-5.62232	1.88409e-08	4.64999e-07	GM43075	predicted gene 43075 [Source:MGI Symbol;Acc:MGI:5663212]	0.528962
ENSMUSG00000043795	24.6757	-0.918393	0.182279	-5.03839	4.69455e-07	8.33531e-06	PRR33	proline rich 33 [Source:MGI Symbol;Acc:MGI:3642289]	0.529098
ENSMUSG00000022607	95.1216	-0.918185	0.150896	-6.08488	1.1658e-09	3.71286e-08	PTK2	PTK2 protein tyrosine kinase 2 [Source:MGI Symbol;Acc:MGI:95481]	0.529174
ENSMUSG00000102703	33.9366	-0.917834	0.167197	-5.48954	4.02973e-08	9.2588e-07	GM38313	predicted gene, 38313 [Source:MGI Symbol;Acc:MGI:5611541]	0.529303
ENSMUSG00000071068	96.3594	-0.912825	0.143385	-6.36623	1.93731e-10	7.26019e-09	TREML2	triggering receptor expressed on myeloid cells-like 2 [Source:MGI Symbol;Acc:MGI:2147038]	0.531144
ENSMUSG00000017412	21.2195	-0.911115	0.193084	-4.71875	2.37293e-06	3.38214e-05	CACNB4	calcium channel, voltage-dependent, beta 4 subunit [Source:MGI Symbol;Acc:MGI:103301]	0.531774
ENSMUSG00000070327	452.372	-0.910143	0.11124	-8.18183	2.79574e-16	2.36657e-14	RNF213	ring finger protein 213 [Source:MGI Symbol;Acc:MGI:1289196]	0.532132
ENSMUSG00000033355	519.53	-0.909909	0.116266	-7.82606	5.03385e-15	3.73666e-13	RTP4	receptor transporter protein 4 [Source:MGI Symbol;Acc:MGI:1915025]	0.532219
ENSMUSG00000019761	29.989	-0.909447	0.164917	-5.51457	3.49629e-08	8.13972e-07	KRT10	keratin 10 [Source:MGI Symbol;Acc:MGI:96685]	0.532389
ENSMUSG00000029605	34.4789	-0.905232	0.16125	-5.61386	1.97867e-08	4.85858e-07	OAS1B	2'-5' oligoadenylate synthetase 1B [Source:MGI Symbol;Acc:MGI:97430]	0.533947
ENSMUSG00000002985	20244.3	-0.899412	0.092895	-9.68203	3.595e-22	5.50662e-20	APOE	apolipoprotein E [Source:MGI Symbol;Acc:MGI:88057]	0.536105
ENSMUSG00000055413	62.2695	-0.897284	0.146676	-6.11746	9.50757e-10	3.08916e-08	H2-Q5	histocompatibility 2, Q region locus 5 [Source:MGI Symbol;Acc:MGI:95934]	0.536896
ENSMUSG00000018451	12.0047	-0.896305	0.192278	-4.6615	3.13917e-06	4.27866e-05	6330403K07RIK	RIKEN cDNA 6330403K07 gene [Source:MGI Symbol;Acc:MGI:1918001]	0.537261
ENSMUSG00000028459	444.075	-0.894841	0.114048	-7.84617	4.28947e-15	3.1964e-13	CD72	CD72 antigen [Source:MGI Symbol;Acc:MGI:88345]	0.537807
ENSMUSG00000028128	33.6079	-0.890368	0.184347	-4.82984	1.36642e-06	2.0798e-05	F3	coagulation factor III [Source:MGI Symbol;Acc:MGI:88381]	0.539477
ENSMUSG00000027533	39.8581	-0.885876	0.181277	-4.88686	1.02456e-06	1.63151e-05	FABP5	fatty acid binding protein 5, epidermal [Source:MGI Symbol;Acc:MGI:101790]	0.541159
ENSMUSG00000078921	191.736	-0.885839	0.160568	-5.5169	3.45024e-08	8.05196e-07	TGTP2	T cell specific GTPase 2 [Source:MGI Symbol;Acc:MGI:3710083]	0.541173
ENSMUSG00000041552	102.152	-0.882473	0.122277	-7.21697	5.3157e-13	3.10888e-11	PTCHD1	patched domain containing 1 [Source:MGI Symbol;Acc:MGI:2685233]	0.542437
ENSMUSG00000018930	573.293	-0.882376	0.128692	-6.8565	7.0567e-12	3.40486e-10	CCL4	chemokine (C-C motif) ligand 4 [Source:MGI Symbol;Acc:MGI:98261]	0.542473
ENSMUSG00000031304	268.323	-0.88037	0.122974	-7.15897	8.12828e-13	4.65507e-11	IL2RG	interleukin 2 receptor, gamma chain [Source:MGI Symbol;Acc:MGI:96551]	0.543228
ENSMUSG00000073491	72.6113	-0.879691	0.168175	-5.23081	1.68767e-07	3.32367e-06	IFI213	interferon activated gene 213 [Source:MGI Symbol;Acc:MGI:3695276]	0.543484
ENSMUSG00000043085	23.5903	-0.878325	0.190889	-4.60123	4.20006e-06	5.51812e-05	TMEM82	transmembrane protein 82 [Source:MGI Symbol;Acc:MGI:2384869]	0.543998
ENSMUSG00000047735	270.348	-0.87762	0.135875	-6.45903	1.05376e-10	4.1761e-09	SAMD9L	sterile alpha motif domain containing 9-like [Source:MGI Symbol;Acc:MGI:1343184]	0.544265
ENSMUSG00000070348	411.643	-0.876869	0.144934	-6.05012	1.44739e-09	4.54961e-08	CCND1	cyclin D1 [Source:MGI Symbol;Acc:MGI:88313]	0.544548
ENSMUSG00000013076	139.747	-0.870845	0.137074	-6.3531	2.11017e-10	7.81694e-09	AMOTL1	angiomotin-like 1 [Source:MGI Symbol;Acc:MGI:1922973]	0.546826
ENSMUSG00000027712	753.185	-0.870387	0.0941075	-9.24886	2.269e-20	2.91944e-18	ANXA5	annexin A5 [Source:MGI Symbol;Acc:MGI:106008]	0.547
ENSMUSG00000024268	39.3366	-0.870158	0.161364	-5.39253	6.94728e-08	1.49863e-06	CELF4	CUGBP, Elav-like family member 4 [Source:MGI Symbol;Acc:MGI:1932407]	0.547087
ENSMUSG00000021886	232.287	-0.864072	0.119532	-7.22882	4.87216e-13	2.88444e-11	GPR65	G-protein coupled receptor 65 [Source:MGI Symbol;Acc:MGI:108031]	0.5494
ENSMUSG00000053318	510.498	-0.863196	0.0761227	-11.3395	8.35871e-30	1.96735e-27	SLAMF8	SLAM family member 8 [Source:MGI Symbol;Acc:MGI:1921998]	0.549733
ENSMUSG00000060402	533.923	-0.861421	0.100044	-8.6104	7.28052e-18	7.243e-16	CHST8	carbohydrate (N-acetylgalactosamine 4-0) sulfotransferase 8 [Source:MGI Symbol;Acc:MGI:1916197]	0.55041
ENSMUSG00000021701	38.3641	-0.859564	0.191508	-4.48841	7.17581e-06	8.83247e-05	PLK2	polo-like kinase 2 [Source:MGI Symbol;Acc:MGI:1099790]	0.551119
ENSMUSG00000053706	51.1995	-0.858094	0.181853	-4.71862	2.37451e-06	3.38214e-05	B430305J03RIK	RIKEN cDNA B430305J03 gene [Source:MGI Symbol;Acc:MGI:3697707]	0.551681
ENSMUSG00000054072	39.7561	-0.857262	0.180847	-4.74027	2.13437e-06	3.08333e-05	IIGP1	interferon inducible GTPase 1 [Source:MGI Symbol;Acc:MGI:1926259]	0.551999
ENSMUSG00000037868	71.512	-0.855253	0.173617	-4.92609	8.38914e-07	1.37562e-05	EGR2	early growth response 2 [Source:MGI Symbol;Acc:MGI:95296]	0.552768
ENSMUSG00000034891	6.32144	-0.85517	0.190491	-4.4893	7.14582e-06	8.81805e-05	SNCB	synuclein, beta [Source:MGI Symbol;Acc:MGI:1889011]	0.5528
ENSMUSG00000007655	37.399	-0.855052	0.176669	-4.83985	1.2994e-06	2.00147e-05	CAV1	caveolin 1, caveolae protein [Source:MGI Symbol;Acc:MGI:102709]	0.552845
ENSMUSG00000052776	250.465	-0.854695	0.132429	-6.45398	1.08947e-10	4.30878e-09	OAS1A	2'-5' oligoadenylate synthetase 1A [Source:MGI Symbol;Acc:MGI:2180860]	0.552982
ENSMUSG00000103898	62.8629	-0.849512	0.158076	-5.37409	7.69697e-08	1.63423e-06	GM30238	predicted gene, 30238 [Source:MGI Symbol;Acc:MGI:5589397]	0.554972
ENSMUSG00000061232	6299.3	-0.848969	0.071137	-11.9343	7.8445e-33	2.16284e-30	H2-K1	histocompatibility 2, K1, K region [Source:MGI Symbol;Acc:MGI:95904]	0.555182
ENSMUSG00000055926	12.3219	-0.848351	0.193106	-4.39319	1.117e-05	0.000130339	GM14137	predicted gene 14137 [Source:MGI Symbol;Acc:MGI:3651144]	0.555419
ENSMUSG00000002265	13.0281	-0.846478	0.187199	-4.5218	6.13166e-06	7.73471e-05	PEG3	paternally expressed 3 [Source:MGI Symbol;Acc:MGI:104748]	0.556141
ENSMUSG00000104986	6.4094	-0.842808	0.188504	-4.47103	7.78433e-06	9.48469e-05	1600023N17RIK	RIKEN cDNA 1600023N17 gene [Source:MGI Symbol;Acc:MGI:1917038]	0.557557
ENSMUSG00000103883	17.0195	-0.84085	0.186809	-4.50112	6.7597e-06	8.41691e-05	GM37010	predicted gene, 37010 [Source:MGI Symbol;Acc:MGI:5610238]	0.558315
ENSMUSG00000063354	183.062	-0.836333	0.141197	-5.92316	3.15821e-09	9.17974e-08	SLC39A4	solute carrier family 39 (zinc transporter), member 4 [Source:MGI Symbol;Acc:MGI:1919277]	0.560065
ENSMUSG00000103160	6.37027	-0.830719	0.192474	-4.31601	1.58877e-05	0.000176836	C130012C08RIK	RIKEN cDNA C130012C08 gene [Source:MGI Symbol;Acc:MGI:2145684]	0.562249
ENSMUSG00000023805	189.138	-0.829222	0.134725	-6.15492	7.51149e-10	2.49521e-08	SYNJ2	synaptojanin 2 [Source:MGI Symbol;Acc:MGI:1201671]	0.562833
ENSMUSG00000063234	3064.72	-0.825781	0.0892114	-9.25645	2.11341e-20	2.73751e-18	GPR84	G protein-coupled receptor 84 [Source:MGI Symbol;Acc:MGI:1934129]	0.564177
ENSMUSG00000104453	23.6018	-0.823153	0.180281	-4.56595	4.9724e-06	6.41475e-05	GM37829	predicted gene, 37829 [Source:MGI Symbol;Acc:MGI:5611057]	0.565205
ENSMUSG00000026435	8.92883	-0.822012	0.176842	-4.64829	3.34691e-06	4.52665e-05	SLC45A3	solute carrier family 45, member 3 [Source:MGI Symbol;Acc:MGI:1922082]	0.565653
ENSMUSG00000036533	363.191	-0.821984	0.0828111	-9.92601	3.2083e-23	5.38437e-21	CDC42EP3	CDC42 effector protein (Rho GTPase binding) 3 [Source:MGI Symbol;Acc:MGI:2384718]	0.565664
ENSMUSG00000026222	540.458	-0.821823	0.0922909	-8.9047	5.35324e-19	5.73986e-17	SP100	nuclear antigen Sp100 [Source:MGI Symbol;Acc:MGI:109561]	0.565727
ENSMUSG00000096971	8.67403	-0.820764	0.190249	-4.31416	1.6021e-05	0.000178011	4930556M19RIK	RIKEN cDNA 4930556M19 gene [Source:MGI Symbol;Acc:MGI:1922509]	0.566142
ENSMUSG00000042371	126.395	-0.816527	0.0961171	-8.49513	1.97707e-17	1.88898e-15	SLC5A10	solute carrier family 5 (sodium/glucose cotransporter), member 10 [Source:MGI Symbol;Acc:MGI:1926089]	0.567807
ENSMUSG00000020658	12.8567	-0.814833	0.183468	-4.44128	8.9427e-06	0.000106936	EFR3B	EFR3 homolog B [Source:MGI Symbol;Acc:MGI:2444851]	0.568474
ENSMUSG00000028927	1552.59	-0.812868	0.0698602	-11.6356	2.7153e-31	6.71864e-29	PADI2	peptidyl arginine deiminase, type II [Source:MGI Symbol;Acc:MGI:1338892]	0.569249
ENSMUSG00000041180	46.4187	-0.810159	0.173819	-4.66094	3.14774e-06	4.28733e-05	HECTD2	HECT domain containing 2 [Source:MGI Symbol;Acc:MGI:2442663]	0.570319
ENSMUSG00000022987	60.0687	-0.809769	0.164659	-4.91785	8.74997e-07	1.42751e-05	ZFP641	zinc finger protein 641 [Source:MGI Symbol;Acc:MGI:2442788]	0.570473
ENSMUSG00000046223	274.331	-0.809184	0.134899	-5.99844	1.99222e-09	6.12259e-08	PLAUR	plasminogen activator, urokinase receptor [Source:MGI Symbol;Acc:MGI:97612]	0.570705
ENSMUSG00000042734	231.353	-0.80889	0.0884031	-9.15001	5.69273e-20	6.82421e-18	TTC9	tetratricopeptide repeat domain 9 [Source:MGI Symbol;Acc:MGI:1916730]	0.570821
ENSMUSG00000009394	13.3558	-0.805189	0.194455	-4.14074	3.46181e-05	0.00034636	SYN2	synapsin II [Source:MGI Symbol;Acc:MGI:103020]	0.572287
ENSMUSG00000029095	16.1292	-0.8004	0.192439	-4.15923	3.19323e-05	0.000323344	ABLIM2	actin-binding LIM protein 2 [Source:MGI Symbol;Acc:MGI:2385758]	0.57419
ENSMUSG00000034413	18.7837	-0.796145	0.193149	-4.12192	3.75726e-05	0.000369598	NEURL1B	neuralized E3 ubiquitin protein ligase 1B [Source:MGI Symbol;Acc:MGI:3643092]	0.575886
ENSMUSG00000086109	10.6209	-0.795946	0.194065	-4.10143	4.10603e-05	0.000399831	GM13391	predicted gene 13391 [Source:MGI Symbol;Acc:MGI:3651526]	0.575965
ENSMUSG00000009185	30.265	-0.795166	0.194717	-4.0837	4.43246e-05	0.000427305	CCL8	chemokine (C-C motif) ligand 8 [Source:MGI Symbol;Acc:MGI:101878]	0.576277
ENSMUSG00000003949	166.9	-0.79485	0.154897	-5.13149	2.87461e-07	5.39688e-06	HLF	hepatic leukemia factor [Source:MGI Symbol;Acc:MGI:96108]	0.576403
ENSMUSG00000030117	13.4706	-0.792213	0.194634	-4.07027	4.6958e-05	0.000449325	GDF3	growth differentiation factor 3 [Source:MGI Symbol;Acc:MGI:95686]	0.577458
ENSMUSG00000025498	300.749	-0.792203	0.133107	-5.95162	2.65508e-09	7.87145e-08	IRF7	interferon regulatory factor 7 [Source:MGI Symbol;Acc:MGI:1859212]	0.577462
ENSMUSG00000025278	390.92	-0.791969	0.140343	-5.64311	1.67008e-08	4.1915e-07	FLNB	filamin, beta [Source:MGI Symbol;Acc:MGI:2446089]	0.577555
ENSMUSG00000051497	49.3883	-0.789814	0.165263	-4.77912	1.76063e-06	2.60585e-05	KCNJ16	potassium inwardly-rectifying channel, subfamily J, member 16 [Source:MGI Symbol;Acc:MGI:1314842]	0.578419
ENSMUSG00000073591	78.6812	-0.789033	0.179006	-4.40786	1.04396e-05	0.000122334	PCDHB22	protocadherin beta 22 [Source:MGI Symbol;Acc:MGI:2136760]	0.578732
ENSMUSG00000030020	13.7272	-0.788008	0.186125	-4.23375	2.29829e-05	0.000241728	PRICKLE2	prickle planar cell polarity protein 2 [Source:MGI Symbol;Acc:MGI:1925144]	0.579143
ENSMUSG00000037217	14.1912	-0.787221	0.185183	-4.25105	2.12772e-05	0.000227004	SYN1	synapsin I [Source:MGI Symbol;Acc:MGI:98460]	0.579459
ENSMUSG00000030731	128.455	-0.785842	0.112667	-6.97491	3.06068e-12	1.57523e-10	SYT3	synaptotagmin III [Source:MGI Symbol;Acc:MGI:99665]	0.580013
ENSMUSG00000042644	222.125	-0.781647	0.145999	-5.3538	8.61282e-08	1.80879e-06	ITPR3	inositol 1,4,5-triphosphate receptor 3 [Source:MGI Symbol;Acc:MGI:96624]	0.581702
ENSMUSG00000028989	383.7	-0.781437	0.100024	-7.81247	5.6077e-15	4.14669e-13	ANGPTL7	angiopoietin-like 7 [Source:MGI Symbol;Acc:MGI:3605801]	0.581787
ENSMUSG00000020331	19.8522	-0.778439	0.185518	-4.19603	2.71628e-05	0.000281246	HCN2	hyperpolarization-activated, cyclic nucleotide-gated K+ 2 [Source:MGI Symbol;Acc:MGI:1298210]	0.582997
ENSMUSG00000027273	97.5322	-0.777366	0.194603	-3.99463	6.47955e-05	0.000594087	SNAP25	synaptosomal-associated protein 25 [Source:MGI Symbol;Acc:MGI:98331]	0.583431
ENSMUSG00000032186	7.58625	-0.775891	0.180422	-4.30043	1.70468e-05	0.000187359	TMOD2	tropomodulin 2 [Source:MGI Symbol;Acc:MGI:1355335]	0.584028
ENSMUSG00000035295	39.0373	-0.771849	0.163122	-4.73172	2.22628e-06	3.19459e-05	WDR38	WD repeat domain 38 [Source:MGI Symbol;Acc:MGI:1923896]	0.585666
ENSMUSG00000026303	1485.58	-0.768826	0.0608946	-12.6255	1.52736e-36	6.14124e-34	MLPH	melanophilin [Source:MGI Symbol;Acc:MGI:2176380]	0.586895
ENSMUSG00000002870	178.388	-0.766886	0.128721	-5.95774	2.55744e-09	7.63476e-08	MCM2	minichromosome maintenance complex component 2 [Source:MGI Symbol;Acc:MGI:105380]	0.587685
ENSMUSG00000033161	1071.97	-0.766319	0.153211	-5.00173	5.68179e-07	9.82603e-06	ATP1A1	ATPase, Na+/K+ transporting, alpha 1 polypeptide [Source:MGI Symbol;Acc:MGI:88105]	0.587915
ENSMUSG00000027698	396.219	-0.765609	0.0952999	-8.03369	9.4587e-16	7.6382e-14	NCEH1	neutral cholesterol ester hydrolase 1 [Source:MGI Symbol;Acc:MGI:2443191]	0.588205
ENSMUSG00000028063	67.4959	-0.762697	0.157644	-4.83809	1.31095e-06	2.01444e-05	LMNA	lamin A [Source:MGI Symbol;Acc:MGI:96794]	0.589394
ENSMUSG00000059479	44.771	-0.761487	0.149353	-5.09857	3.42235e-07	6.29061e-06	B3GNT8	UDP-GlcNAc:betaGal beta-1,3-N-acetylglucosaminyltransferase 8 [Source:MGI Symbol;Acc:MGI:2385269]	0.589888
ENSMUSG00000030087	33.4721	-0.761306	0.194052	-3.92322	8.73749e-05	0.000758586	KLF15	Kruppel-like factor 15 [Source:MGI Symbol;Acc:MGI:1929988]	0.589962
ENSMUSG00000018920	1580.74	-0.759771	0.0648962	-11.7075	1.16696e-31	3.04356e-29	CXCL16	chemokine (C-X-C motif) ligand 16 [Source:MGI Symbol;Acc:MGI:1932682]	0.59059
ENSMUSG00000026950	18.9305	-0.757751	0.19309	-3.92434	8.69692e-05	0.000755743	NEB	nebulin [Source:MGI Symbol;Acc:MGI:97292]	0.591417
ENSMUSG00000076441	10.3786	-0.757645	0.192388	-3.93811	8.21246e-05	0.000721113	ASS1	argininosuccinate synthetase 1 [Source:MGI Symbol;Acc:MGI:88090]	0.591461
ENSMUSG00000025324	25.8083	-0.756038	0.194423	-3.88863	0.000100811	0.000858248	ATP10A	ATPase, class V, type 10A [Source:MGI Symbol;Acc:MGI:1330809]	0.59212
ENSMUSG00000033615	14.5335	-0.75569	0.191303	-3.95023	7.80768e-05	0.000693457	CPLX1	complexin 1 [Source:MGI Symbol;Acc:MGI:104727]	0.592263
ENSMUSG00000022346	675.739	-0.753737	0.1353	-5.57087	2.53476e-08	6.12277e-07	MYC	myelocytomatosis oncogene [Source:MGI Symbol;Acc:MGI:97250]	0.593065
ENSMUSG00000066235	162.02	-0.752495	0.11844	-6.3534	2.10611e-10	7.81692e-09	POMGNT2	protein O-linked mannose beta 1,4-N-acetylglucosaminyltransferase 2 [Source:MGI Symbol;Acc:MGI:2143424]	0.593576
ENSMUSG00000070501	21.6727	-0.752404	0.18551	-4.05588	4.99467e-05	0.000472072	IFI214	interferon activated gene 214 [Source:MGI Symbol;Acc:MGI:3584522]	0.593613
ENSMUSG00000023868	29.9875	-0.750642	0.194734	-3.85471	0.000115868	0.000961826	PDE10A	phosphodiesterase 10A [Source:MGI Symbol;Acc:MGI:1345143]	0.594339
ENSMUSG00000027322	56.0786	-0.749572	0.172859	-4.33632	1.44889e-05	0.000162958	SIGLEC1	sialic acid binding Ig-like lectin 1, sialoadhesin [Source:MGI Symbol;Acc:MGI:99668]	0.59478
ENSMUSG00000049744	205.513	-0.74901	0.148849	-5.03201	4.85358e-07	8.58512e-06	ARHGAP15	Rho GTPase activating protein 15 [Source:MGI Symbol;Acc:MGI:1923367]	0.595012
ENSMUSG00000032184	5.53557	-0.747317	0.193723	-3.85766	0.000114479	0.000954029	LYSMD2	LysM, putative peptidoglycan-binding, domain containing 2 [Source:MGI Symbol;Acc:MGI:1917332]	0.59571
ENSMUSG00000085442	12.4772	-0.747081	0.194081	-3.84933	0.000118442	0.000981082	GM3362	predicted pseudogene 3362 [Source:MGI Symbol;Acc:MGI:3781540]	0.595808
ENSMUSG00000042116	21.2639	-0.740684	0.185463	-3.99371	6.50465e-05	0.000596105	VWA1	von Willebrand factor A domain containing 1 [Source:MGI Symbol;Acc:MGI:2179729]	0.598455
ENSMUSG00000078902	13.5672	-0.740611	0.192456	-3.84821	0.000118982	0.000984713	GM14443	predicted gene 14443 [Source:MGI Symbol;Acc:MGI:3652324]	0.598486
ENSMUSG00000035105	20.7827	-0.736913	0.189239	-3.89408	9.85729e-05	0.000840679	EGLN3	egl-9 family hypoxia-inducible factor 3 [Source:MGI Symbol;Acc:MGI:1932288]	0.600022
ENSMUSG00000030029	9.60504	-0.734132	0.189686	-3.87026	0.000108721	0.000916695	LRIG1	leucine-rich repeats and immunoglobulin-like domains 1 [Source:MGI Symbol;Acc:MGI:107935]	0.60118
ENSMUSG00000043740	570.974	-0.733066	0.104827	-6.99309	2.6889e-12	1.40639e-10	B430306N03RIK	RIKEN cDNA B430306N03 gene [Source:MGI Symbol;Acc:MGI:2443478]	0.601624
ENSMUSG00000068205	11.7404	-0.732631	0.194482	-3.7671	0.000165157	0.00131066	MACROD2	MACRO domain containing 2 [Source:MGI Symbol;Acc:MGI:1920149]	0.601805
ENSMUSG00000085184	50.9207	-0.731848	0.161926	-4.51963	6.19471e-06	7.80405e-05	4933439K11RIK	RIKEN cDNA 4933439K11 gene [Source:MGI Symbol;Acc:MGI:1918569]	0.602132
ENSMUSG00000025085	321.584	-0.731528	0.112984	-6.4746	9.50649e-11	3.79081e-09	ABLIM1	actin-binding LIM protein 1 [Source:MGI Symbol;Acc:MGI:1194500]	0.602266
ENSMUSG00000103199	24.855	-0.730376	0.189432	-3.85562	0.000115438	0.000959497	GM37648	predicted gene, 37648 [Source:MGI Symbol;Acc:MGI:5610876]	0.602747
ENSMUSG00000028680	767.116	-0.728921	0.109693	-6.64513	3.02957e-11	1.31988e-09	PLK3	polo-like kinase 3 [Source:MGI Symbol;Acc:MGI:109604]	0.603355
ENSMUSG00000075602	125.956	-0.726243	0.14216	-5.10863	3.24498e-07	6.00462e-06	LY6A	lymphocyte antigen 6 complex, locus A [Source:MGI Symbol;Acc:MGI:107527]	0.604476
ENSMUSG00000029598	1608.94	-0.725784	0.0763445	-9.5067	1.96815e-21	2.79303e-19	PLBD2	phospholipase B domain containing 2 [Source:MGI Symbol;Acc:MGI:1919022]	0.604668
ENSMUSG00000031142	11.7585	-0.725778	0.192198	-3.7762	0.000159241	0.00126736	CACNA1F	calcium channel, voltage-dependent, alpha 1F subunit [Source:MGI Symbol;Acc:MGI:1859639]	0.604671
ENSMUSG00000046691	292.376	-0.725131	0.144919	-5.00368	5.62452e-07	9.74446e-06	CHTF8	CTF8, chromosome transmission fidelity factor 8 [Source:MGI Symbol;Acc:MGI:2443370]	0.604942
ENSMUSG00000070427	43.9506	-0.72334	0.167739	-4.31229	1.61569e-05	0.000179234	IL18BP	interleukin 18 binding protein [Source:MGI Symbol;Acc:MGI:1333800]	0.605693
ENSMUSG00000020932	16.3648	-0.723296	0.192752	-3.75247	0.0001751	0.00137823	GFAP	glial fibrillary acidic protein [Source:MGI Symbol;Acc:MGI:95697]	0.605712
ENSMUSG00000026773	1688.39	-0.722023	0.0815955	-8.8488	8.8462e-19	9.22874e-17	PFKFB3	6-phosphofructo-2-kinase/fructose-2,6-biphosphatase 3 [Source:MGI Symbol;Acc:MGI:2181202]	0.606247
ENSMUSG00000026628	289.907	-0.72182	0.129469	-5.57525	2.47176e-08	5.97806e-07	ATF3	activating transcription factor 3 [Source:MGI Symbol;Acc:MGI:109384]	0.606332
ENSMUSG00000105769	10.2429	-0.72122	0.189395	-3.80801	0.000140091	0.0011346	GM43351	predicted gene 43351 [Source:MGI Symbol;Acc:MGI:5663488]	0.606584
ENSMUSG00000005973	278.419	-0.716293	0.0938428	-7.6329	2.29532e-14	1.60506e-12	RCN1	reticulocalbin 1 [Source:MGI Symbol;Acc:MGI:104559]	0.608659
ENSMUSG00000029223	11.992	-0.715748	0.192405	-3.72001	0.000199216	0.00154288	UCHL1	ubiquitin carboxy-terminal hydrolase L1 [Source:MGI Symbol;Acc:MGI:103149]	0.608889
ENSMUSG00000071537	48.0024	-0.715459	0.163064	-4.38759	1.14616e-05	0.000133155	KLRG2	killer cell lectin-like receptor subfamily G, member 2 [Source:MGI Symbol;Acc:MGI:1921503]	0.609012
ENSMUSG00000103149	26.8951	-0.715211	0.180981	-3.95187	7.75437e-05	0.000689357	AA914427	EST AA914427 [Source:MGI Symbol;Acc:MGI:1858439]	0.609116
ENSMUSG00000049313	1147.41	-0.712759	0.128333	-5.55398	2.79237e-08	6.62887e-07	SORL1	sortilin-related receptor, LDLR class A repeats-containing [Source:MGI Symbol;Acc:MGI:1202296]	0.610152
ENSMUSG00000026605	48.7552	-0.711544	0.176022	-4.04235	5.29171e-05	0.000497467	CENPF	centromere protein F [Source:MGI Symbol;Acc:MGI:1313302]	0.610666
ENSMUSG00000040249	6727.72	-0.711138	0.110504	-6.43541	1.23136e-10	4.82056e-09	LRP1	low density lipoprotein receptor-related protein 1 [Source:MGI Symbol;Acc:MGI:96828]	0.610838
ENSMUSG00000104662	12.0782	-0.710793	0.188504	-3.77071	0.000162785	0.00129237	GM43267	predicted gene 43267 [Source:MGI Symbol;Acc:MGI:5663404]	0.610984
ENSMUSG00000085337	98.6656	-0.710483	0.126785	-5.60385	2.09644e-08	5.1152e-07	GM15964	predicted gene 15964 [Source:MGI Symbol;Acc:MGI:3802003]	0.611116
ENSMUSG00000035509	12.6036	-0.709539	0.194596	-3.64621	0.000266133	0.00196743	FBXL21	F-box and leucine-rich repeat protein 21 [Source:MGI Symbol;Acc:MGI:2442921]	0.611515
ENSMUSG00000025855	311.1	-0.708202	0.100771	-7.02785	2.09743e-12	1.13074e-10	PRKAR1B	protein kinase, cAMP dependent regulatory, type I beta [Source:MGI Symbol;Acc:MGI:97759]	0.612083
ENSMUSG00000056880	57.2823	-0.707937	0.16157	-4.3816	1.1781e-05	0.000136315	GADL1	glutamate decarboxylase-like 1 [Source:MGI Symbol;Acc:MGI:1920998]	0.612195
ENSMUSG00000029096	269.35	-0.707867	0.113125	-6.25738	3.91489e-10	1.3813e-08	HTRA3	HtrA serine peptidase 3 [Source:MGI Symbol;Acc:MGI:1925808]	0.612225
ENSMUSG00000073490	136.436	-0.706688	0.160987	-4.38973	1.13492e-05	0.000132031	IFI207	interferon activated gene 207 [Source:MGI Symbol;Acc:MGI:2138302]	0.612725
ENSMUSG00000042763	18.184	-0.706272	0.189944	-3.71831	0.000200557	0.00155078	MANEAL	mannosidase, endo-alpha-like [Source:MGI Symbol;Acc:MGI:2684896]	0.612902
ENSMUSG00000102717	25.394	-0.704274	0.178708	-3.94092	8.11689e-05	0.00071402	GM37759	predicted gene, 37759 [Source:MGI Symbol;Acc:MGI:5610987]	0.613751
ENSMUSG00000000982	401.713	-0.703391	0.149543	-4.7036	2.5562e-06	3.57757e-05	CCL3	chemokine (C-C motif) ligand 3 [Source:MGI Symbol;Acc:MGI:98260]	0.614127
ENSMUSG00000000317	11.14	-0.703179	0.194738	-3.6109	0.000305141	0.00220634	BCL6B	B cell CLL/lymphoma 6, member B [Source:MGI Symbol;Acc:MGI:1278332]	0.614217
ENSMUSG00000060240	7.09977	-0.699458	0.182655	-3.82939	0.000128461	0.00105367	CEND1	cell cycle exit and neuronal differentiation 1 [Source:MGI Symbol;Acc:MGI:1929898]	0.615803
ENSMUSG00000025510	189.301	-0.698082	0.193493	-3.60779	0.000308818	0.00222811	CD151	CD151 antigen [Source:MGI Symbol;Acc:MGI:1096360]	0.616391
ENSMUSG00000000386	73.7491	-0.697766	0.163661	-4.26349	2.01257e-05	0.00021724	MX1	MX dynamin-like GTPase 1 [Source:MGI Symbol;Acc:MGI:97243]	0.616526
ENSMUSG00000022421	116.991	-0.697147	0.128455	-5.42717	5.72547e-08	1.2709e-06	NPTXR	neuronal pentraxin receptor [Source:MGI Symbol;Acc:MGI:1920590]	0.616791
ENSMUSG00000080316	53.5462	-0.695901	0.159496	-4.36311	1.28224e-05	0.000146607	SPACA6	sperm acrosome associated 6 [Source:MGI Symbol;Acc:MGI:1922452]	0.617324
ENSMUSG00000025875	39.8823	-0.694502	0.180708	-3.84323	0.000121426	0.00100322	TSPAN17	tetraspanin 17 [Source:MGI Symbol;Acc:MGI:1921507]	0.617923
ENSMUSG00000026355	320.916	-0.694425	0.0852785	-8.14302	3.85535e-16	3.23514e-14	MCM6	minichromosome maintenance complex component 6 [Source:MGI Symbol;Acc:MGI:1298227]	0.617956
ENSMUSG00000026407	77.225	-0.69432	0.147451	-4.70881	2.4917e-06	3.50508e-05	CACNA1S	calcium channel, voltage-dependent, L type, alpha 1S subunit [Source:MGI Symbol;Acc:MGI:88294]	0.618
ENSMUSG00000054459	10.5222	-0.69288	0.190407	-3.63894	0.000273759	0.00201103	VSNL1	visinin-like 1 [Source:MGI Symbol;Acc:MGI:1349453]	0.618618
ENSMUSG00000040883	57.6188	-0.692045	0.1459	-4.74329	2.10274e-06	3.04676e-05	TMEM205	transmembrane protein 205 [Source:MGI Symbol;Acc:MGI:3045495]	0.618976
ENSMUSG00000097613	15.1985	-0.689448	0.194624	-3.54246	0.00039641	0.00275106	GM17597	predicted gene, 17597 [Source:MGI Symbol;Acc:MGI:4937231]	0.620091
ENSMUSG00000073274	17.4234	-0.686384	0.18763	-3.65819	0.000254006	0.00189279	GM14636	predicted gene 14636 [Source:MGI Symbol;Acc:MGI:3641976]	0.621409
ENSMUSG00000102289	24.7318	-0.686277	0.194318	-3.53172	0.00041287	0.00284383	GM31258	predicted gene, 31258 [Source:MGI Symbol;Acc:MGI:5590417]	0.621456
ENSMUSG00000027581	9.95116	-0.685485	0.186967	-3.66633	0.000246055	0.00184064	STMN3	stathmin-like 3 [Source:MGI Symbol;Acc:MGI:1277137]	0.621797
ENSMUSG00000047182	45.0682	-0.683297	0.159704	-4.27853	1.88134e-05	0.000204217	IRS3	insulin receptor substrate 3 [Source:MGI Symbol;Acc:MGI:1194882]	0.622741
ENSMUSG00000042589	70.2176	-0.6814	0.138903	-4.90558	9.31502e-07	1.50443e-05	CUX2	cut-like homeobox 2 [Source:MGI Symbol;Acc:MGI:107321]	0.62356
ENSMUSG00000097296	65.7697	-0.681036	0.162947	-4.1795	2.92153e-05	0.000299605	GM26532	predicted gene, 26532 [Source:MGI Symbol;Acc:MGI:5477026]	0.623717
ENSMUSG00000017721	282.305	-0.680025	0.125757	-5.40747	6.39205e-08	1.39871e-06	PIGT	phosphatidylinositol glycan anchor biosynthesis, class T [Source:MGI Symbol;Acc:MGI:1926178]	0.624154
ENSMUSG00000035692	90.2093	-0.67838	0.135045	-5.02338	5.07703e-07	8.90789e-06	ISG15	ISG15 ubiquitin-like modifier [Source:MGI Symbol;Acc:MGI:1855694]	0.624867
ENSMUSG00000074063	99.3458	-0.677081	0.150847	-4.48854	7.17124e-06	8.83247e-05	OSGIN1	oxidative stress induced growth inhibitor 1 [Source:MGI Symbol;Acc:MGI:1919089]	0.625429
ENSMUSG00000034917	20.73	-0.676297	0.194633	-3.47473	0.000511376	0.00339276	TJP3	tight junction protein 3 [Source:MGI Symbol;Acc:MGI:1351650]	0.625769
ENSMUSG00000076036	120.862	-0.674986	0.113213	-5.96207	2.49055e-09	7.46393e-08	GM22133	predicted gene, 22133 [Source:MGI Symbol;Acc:MGI:5451910]	0.626338
ENSMUSG00000033253	162.824	-0.674301	0.145606	-4.63101	3.63884e-06	4.86692e-05	SZT2	seizure threshold 2 [Source:MGI Symbol;Acc:MGI:3033336]	0.626636
ENSMUSG00000027878	899.231	-0.674214	0.113413	-5.94477	2.76843e-09	8.15735e-08	NOTCH2	notch 2 [Source:MGI Symbol;Acc:MGI:97364]	0.626674
ENSMUSG00000036617	14.0902	-0.673463	0.174804	-3.85268	0.000116831	0.000968572	ETL4	enhancer trap locus 4 [Source:MGI Symbol;Acc:MGI:95454]	0.627
ENSMUSG00000037259	23.9408	-0.673391	0.184459	-3.65063	0.000261594	0.0019396	DZANK1	double zinc ribbon and ankyrin repeat domains 1 [Source:MGI Symbol;Acc:MGI:2139080]	0.627031
ENSMUSG00000030605	471.123	-0.672788	0.0847853	-7.9352	2.10158e-15	1.62894e-13	MFGE8	milk fat globule-EGF factor 8 protein [Source:MGI Symbol;Acc:MGI:102768]	0.627293
ENSMUSG00000089844	8.71246	-0.671935	0.194708	-3.45099	0.000558531	0.003643	A530032D15RIK	RIKEN cDNA A530032D15Rik gene [Source:MGI Symbol;Acc:MGI:3037746]	0.627664
ENSMUSG00000053574	44.6047	-0.669721	0.167324	-4.00254	6.26663e-05	0.000575933	4930563E22RIK	RIKEN cDNA 4930563E22 gene [Source:MGI Symbol;Acc:MGI:1922554]	0.628628
ENSMUSG00000004552	20.6146	-0.668635	0.193468	-3.45604	0.000548168	0.00359664	CTSE	cathepsin E [Source:MGI Symbol;Acc:MGI:107361]	0.629102
ENSMUSG00000055322	864.343	-0.666085	0.0886908	-7.51019	5.90429e-14	3.9159e-12	TNS1	tensin 1 [Source:MGI Symbol;Acc:MGI:104552]	0.630215
ENSMUSG00000020850	879.135	-0.665664	0.116809	-5.69876	1.20683e-08	3.13063e-07	PRPF8	pre-mRNA processing factor 8 [Source:MGI Symbol;Acc:MGI:2179381]	0.630398
ENSMUSG00000043391	1728.41	-0.665284	0.0966903	-6.88056	5.96163e-12	2.9206e-10	2510009E07RIK	RIKEN cDNA 2510009E07 gene [Source:MGI Symbol;Acc:MGI:1919440]	0.630565
ENSMUSG00000105368	22.8264	-0.66526	0.170277	-3.90693	9.34743e-05	0.000802515	GM43759	predicted gene 43759 [Source:MGI Symbol;Acc:MGI:5663896]	0.630575
ENSMUSG00000032911	17.0972	-0.664649	0.142382	-4.66808	3.04031e-06	4.17043e-05	CSPG4	chondroitin sulfate proteoglycan 4 [Source:MGI Symbol;Acc:MGI:2153093]	0.630842
ENSMUSG00000025887	39.9747	-0.664443	0.176427	-3.76612	0.000165806	0.00131419	CASP12	caspase 12 [Source:MGI Symbol;Acc:MGI:1312922]	0.630932
ENSMUSG00000001665	76.23	-0.66434	0.158575	-4.18944	2.7964e-05	0.000288458	GSTT3	glutathione S-transferase, theta 3 [Source:MGI Symbol;Acc:MGI:2143526]	0.630977
ENSMUSG00000104358	14.2409	-0.663993	0.188523	-3.52208	0.000428181	0.00293046	GM37127	predicted gene, 37127 [Source:MGI Symbol;Acc:MGI:5610355]	0.631129
ENSMUSG00000044703	39.9594	-0.663619	0.168628	-3.93541	8.30556e-05	0.000728535	PHF11A	PHD finger protein 11A [Source:MGI Symbol;Acc:MGI:1918441]	0.631293
ENSMUSG00000038034	1450	-0.662553	0.0677288	-9.78244	1.33941e-22	2.13642e-20	IGSF8	immunoglobulin superfamily, member 8 [Source:MGI Symbol;Acc:MGI:2154090]	0.63176
ENSMUSG00000101037	14.0429	-0.662406	0.194674	-3.40265	0.000667364	0.00422715	GM28424	predicted gene 28424 [Source:MGI Symbol;Acc:MGI:5579130]	0.631824
ENSMUSG00000020277	1927.73	-0.660642	0.0737902	-8.95297	3.46047e-19	3.83834e-17	PFKL	phosphofructokinase, liver, B-type [Source:MGI Symbol;Acc:MGI:97547]	0.632597
ENSMUSG00000052981	4.56679	-0.657229	0.168652	-3.89696	9.74067e-05	0.000832204	UBE2QL1	ubiquitin-conjugating enzyme E2Q family-like 1 [Source:MGI Symbol;Acc:MGI:1924230]	0.634095
ENSMUSG00000027230	39.0631	-0.656479	0.172274	-3.81066	0.000138598	0.00112439	CREB3L1	cAMP responsive element binding protein 3-like 1 [Source:MGI Symbol;Acc:MGI:1347062]	0.634425
ENSMUSG00000039316	245.854	-0.655718	0.100422	-6.52962	6.59383e-11	2.68483e-09	RFTN1	raftlin lipid raft linker 1 [Source:MGI Symbol;Acc:MGI:1923688]	0.63476
ENSMUSG00000042622	7.79333	-0.655362	0.194575	-3.36818	0.000756675	0.00468672	MAFF	v-maf musculoaponeurotic fibrosarcoma oncogene family, protein F (avian) [Source:MGI Symbol;Acc:MGI:96910]	0.634916
ENSMUSG00000006219	345.809	-0.654113	0.0962691	-6.79463	1.08594e-11	5.08703e-10	FBLIM1	filamin binding LIM protein 1 [Source:MGI Symbol;Acc:MGI:1921452]	0.635466
ENSMUSG00000090230	6.64096	-0.653021	0.194771	-3.35275	0.000800121	0.00490544	GM16315	predicted gene 16315 [Source:MGI Symbol;Acc:MGI:3826564]	0.635947
ENSMUSG00000097057	30.4082	-0.650847	0.174531	-3.72911	0.000192156	0.00149393	GM17638	predicted gene, 17638 [Source:MGI Symbol;Acc:MGI:4937272]	0.636906
ENSMUSG00000006930	50.5258	-0.650028	0.162802	-3.99275	6.53126e-05	0.000597692	HAP1	huntingtin-associated protein 1 [Source:MGI Symbol;Acc:MGI:1261831]	0.637268
ENSMUSG00000027995	3548.77	-0.649673	0.0543298	-11.958	5.89961e-33	1.69944e-30	TLR2	toll-like receptor 2 [Source:MGI Symbol;Acc:MGI:1346060]	0.637425
ENSMUSG00000086368	34.7574	-0.649183	0.171979	-3.77479	0.000160144	0.0012735	GM13830	predicted gene 13830 [Source:MGI Symbol;Acc:MGI:3651141]	0.637641
ENSMUSG00000020589	541.482	-0.648062	0.1053	-6.15443	7.53476e-10	2.49864e-08	FAM49A	family with sequence similarity 49, member A [Source:MGI Symbol;Acc:MGI:1261783]	0.638137
ENSMUSG00000036067	96.5378	-0.647995	0.174038	-3.7233	0.000196634	0.00152534	SLC2A6	solute carrier family 2 (facilitated glucose transporter), member 6 [Source:MGI Symbol;Acc:MGI:2443286]	0.638167
ENSMUSG00000031586	269.971	-0.647732	0.0874629	-7.40579	1.30368e-13	8.35915e-12	RBPMS	RNA binding protein gene with multiple splicing [Source:MGI Symbol;Acc:MGI:1334446]	0.638283
ENSMUSG00000019831	8.79135	-0.64764	0.192367	-3.3667	0.000760745	0.00470438	WASF1	WAS protein family, member 1 [Source:MGI Symbol;Acc:MGI:1890563]	0.638324
ENSMUSG00000003382	997.452	-0.647042	0.0845864	-7.64948	2.01799e-14	1.41626e-12	ETV3	ets variant 3 [Source:MGI Symbol;Acc:MGI:1350926]	0.638588
ENSMUSG00000037474	19.4543	-0.645797	0.194543	-3.31956	0.000901606	0.00541007	DTL	denticleless E3 ubiquitin protein ligase [Source:MGI Symbol;Acc:MGI:1924093]	0.63914
ENSMUSG00000068735	677.235	-0.645263	0.0949561	-6.79538	1.0803e-11	5.08532e-10	TRP53I11	transformation related protein 53 inducible protein 11 [Source:MGI Symbol;Acc:MGI:2670995]	0.639376
ENSMUSG00000048330	341.223	-0.644384	0.114996	-5.60353	2.1003e-08	5.11816e-07	RIC3	RIC3 acetylcholine receptor chaperone [Source:MGI Symbol;Acc:MGI:2443887]	0.639766
ENSMUSG00000001493	8.20656	-0.643421	0.19175	-3.35552	0.000792158	0.00487003	MEOX1	mesenchyme homeobox 1 [Source:MGI Symbol;Acc:MGI:103220]	0.640193
ENSMUSG00000026483	711.291	-0.643102	0.11001	-5.84585	5.03976e-09	1.40763e-07	FAM129A	family with sequence similarity 129, member A [Source:MGI Symbol;Acc:MGI:2137237]	0.640335
ENSMUSG00000104346	27.552	-0.642344	0.194627	-3.30038	0.00096553	0.00572847	PCDHGA3	protocadherin gamma subfamily A, 3 [Source:MGI Symbol;Acc:MGI:1935215]	0.640671
ENSMUSG00000020607	7.17419	-0.642254	0.191426	-3.35511	0.00079334	0.00487316	FAM84A	family with sequence similarity 84, member A [Source:MGI Symbol;Acc:MGI:2145011]	0.640711
ENSMUSG00000036534	909.194	-0.641581	0.124503	-5.15315	2.56146e-07	4.87537e-06	SLC38A7	solute carrier family 38, member 7 [Source:MGI Symbol;Acc:MGI:2679005]	0.64101
ENSMUSG00000063428	5.67958	-0.641501	0.156541	-4.09797	4.16781e-05	0.000404825	DDO	D-aspartate oxidase [Source:MGI Symbol;Acc:MGI:1925528]	0.641046
ENSMUSG00000000957	833.638	-0.641196	0.0950875	-6.74322	1.54913e-11	7.10171e-10	MMP14	matrix metallopeptidase 14 (membrane-inserted) [Source:MGI Symbol;Acc:MGI:101900]	0.641181
ENSMUSG00000032076	2834.37	-0.638903	0.0690112	-9.25795	2.08393e-20	2.71755e-18	CADM1	cell adhesion molecule 1 [Source:MGI Symbol;Acc:MGI:1889272]	0.642201
ENSMUSG00000022658	11.6734	-0.638391	0.19424	-3.2866	0.00101404	0.0059704	TAGLN3	transgelin 3 [Source:MGI Symbol;Acc:MGI:1926784]	0.642429
ENSMUSG00000052949	270.758	-0.637822	0.121742	-5.23912	1.61346e-07	3.19383e-06	RNF157	ring finger protein 157 [Source:MGI Symbol;Acc:MGI:2442484]	0.642683
ENSMUSG00000034612	108.185	-0.636158	0.149852	-4.24523	2.18365e-05	0.000231563	CHST11	carbohydrate sulfotransferase 11 [Source:MGI Symbol;Acc:MGI:1927166]	0.643424
ENSMUSG00000016256	26874.4	-0.635301	0.0710068	-8.94704	3.65147e-19	4.00417e-17	CTSZ	cathepsin Z [Source:MGI Symbol;Acc:MGI:1891190]	0.643807
ENSMUSG00000028785	15.308	-0.634943	0.191955	-3.30777	0.000940415	0.00561491	HPCA	hippocalcin [Source:MGI Symbol;Acc:MGI:1336200]	0.643966
ENSMUSG00000062593	313.638	-0.633648	0.140398	-4.51323	6.38478e-06	8.01212e-05	LILRB4A	leukocyte immunoglobulin-like receptor, subfamily B, member 4A [Source:MGI Symbol;Acc:MGI:102701]	0.644544
ENSMUSG00000030435	454.352	-0.632848	0.109876	-5.75967	8.42772e-09	2.23427e-07	U2AF2	U2 small nuclear ribonucleoprotein auxiliary factor (U2AF) 2 [Source:MGI Symbol;Acc:MGI:98886]	0.644902
ENSMUSG00000090031	162.969	-0.632036	0.136749	-4.62185	3.80331e-06	5.04494e-05	4732440D04RIK	RIKEN cDNA 4732440D04 gene [Source:MGI Symbol;Acc:MGI:3604103]	0.645265
ENSMUSG00000055430	17.7523	-0.631959	0.193859	-3.2599	0.00111453	0.00644025	NAP1L5	nucleosome assembly protein 1-like 5 [Source:MGI Symbol;Acc:MGI:1923555]	0.6453
ENSMUSG00000035352	1060.56	-0.630638	0.12424	-5.07597	3.85532e-07	6.98195e-06	CCL12	chemokine (C-C motif) ligand 12 [Source:MGI Symbol;Acc:MGI:108224]	0.645891
ENSMUSG00000028222	6.96229	-0.62948	0.173503	-3.62807	0.000285546	0.00208672	CALB1	calbindin 1 [Source:MGI Symbol;Acc:MGI:88248]	0.646409
ENSMUSG00000029053	115.957	-0.629094	0.107188	-5.8691	4.38175e-09	1.23637e-07	PRKCZ	protein kinase C, zeta [Source:MGI Symbol;Acc:MGI:97602]	0.646582
ENSMUSG00000041120	127.468	-0.628172	0.125816	-4.99276	5.95219e-07	1.02661e-05	NBL1	neuroblastoma, suppression of tumorigenicity 1 [Source:MGI Symbol;Acc:MGI:104591]	0.646996
ENSMUSG00000085875	9.73011	-0.627376	0.188048	-3.33625	0.000849157	0.0051456	GM12905	predicted gene 12905 [Source:MGI Symbol;Acc:MGI:3702581]	0.647353
ENSMUSG00000005043	372.39	-0.626988	0.0974918	-6.43119	1.26609e-10	4.91855e-09	SGSH	N-sulfoglucosamine sulfohydrolase (sulfamidase) [Source:MGI Symbol;Acc:MGI:1350341]	0.647527
ENSMUSG00000018707	950.552	-0.626748	0.0913319	-6.86232	6.7752e-12	3.27723e-10	DYNC1H1	dynein cytoplasmic 1 heavy chain 1 [Source:MGI Symbol;Acc:MGI:103147]	0.647634
ENSMUSG00000028337	425.448	-0.625545	0.0984843	-6.35172	2.12914e-10	7.87212e-09	CORO2A	coronin, actin binding protein 2A [Source:MGI Symbol;Acc:MGI:1345966]	0.648175
ENSMUSG00000021411	567.956	-0.624161	0.0670694	-9.3062	1.32487e-20	1.73945e-18	PXDC1	PX domain containing 1 [Source:MGI Symbol;Acc:MGI:1914145]	0.648797
ENSMUSG00000025931	45.5713	-0.622833	0.173563	-3.58852	0.000332557	0.00237365	PAQR8	progestin and adipoQ receptor family member VIII [Source:MGI Symbol;Acc:MGI:1921479]	0.649394
ENSMUSG00000028645	1000.78	-0.622515	0.0647728	-9.61075	7.20201e-22	1.07751e-19	SLC2A1	solute carrier family 2 (facilitated glucose transporter), member 1 [Source:MGI Symbol;Acc:MGI:95755]	0.649538
ENSMUSG00000079056	502.112	-0.622363	0.0948417	-6.56213	5.30458e-11	2.18757e-09	KCNIP3	Kv channel interacting protein 3, calsenilin [Source:MGI Symbol;Acc:MGI:1929258]	0.649606
ENSMUSG00000105356	25.5409	-0.622034	0.190969	-3.25725	0.00112498	0.0064948	GM42603	predicted gene 42603 [Source:MGI Symbol;Acc:MGI:5662740]	0.649754
ENSMUSG00000032788	454.989	-0.621789	0.107446	-5.78699	7.16583e-09	1.93157e-07	PDXK	pyridoxal (pyridoxine, vitamin B6) kinase [Source:MGI Symbol;Acc:MGI:1351869]	0.649865
ENSMUSG00000052151	177.599	-0.62146	0.098508	-6.30873	2.8134e-10	1.0245e-08	PLPP2	phospholipid phosphatase 2 [Source:MGI Symbol;Acc:MGI:1354945]	0.650013
ENSMUSG00000095123	86.5201	-0.621387	0.162612	-3.8213	0.000132751	0.00108471	GM21781	predicted gene, 21781 [Source:MGI Symbol;Acc:MGI:5433945]	0.650045
ENSMUSG00000052912	10.9843	-0.620809	0.194731	-3.18803	0.00143246	0.00798802	SMARCA5-PS	SWI/SNF related, matrix associated, actin depenent ragulator of chromatin, subfamily a, member 5, pseudogene [Source:MGI Symbol;Acc:MGI:2443330]	0.650306
ENSMUSG00000009575	174.818	-0.620667	0.128877	-4.81597	1.46489e-06	2.21918e-05	CBX5	chromobox 5 [Source:MGI Symbol;Acc:MGI:109372]	0.65037
ENSMUSG00000026564	323.415	-0.620595	0.130869	-4.74211	2.11504e-06	3.0577e-05	DUSP27	dual specificity phosphatase 27 (putative) [Source:MGI Symbol;Acc:MGI:2685055]	0.650403
ENSMUSG00000069793	92.1535	-0.619334	0.124357	-4.9803	6.34853e-07	1.08239e-05	SLFN9	schlafen 9 [Source:MGI Symbol;Acc:MGI:2445121]	0.650971
ENSMUSG00000107136	67.0391	-0.618147	0.15397	-4.01473	5.95147e-05	0.000551962	GM42466	predicted gene 42466 [Source:MGI Symbol;Acc:MGI:5662603]	0.651507
ENSMUSG00000020027	14.8862	-0.617586	0.190122	-3.24836	0.00116071	0.00667315	SOCS2	suppressor of cytokine signaling 2 [Source:MGI Symbol;Acc:MGI:1201787]	0.651761
ENSMUSG00000029864	109.727	-0.617169	0.143746	-4.29346	1.75913e-05	0.000192576	GSTK1	glutathione S-transferase kappa 1 [Source:MGI Symbol;Acc:MGI:1923513]	0.651949
ENSMUSG00000006445	201.711	-0.616585	0.153137	-4.02636	5.66474e-05	0.000528928	EPHA2	Eph receptor A2 [Source:MGI Symbol;Acc:MGI:95278]	0.652213
ENSMUSG00000034825	9.34533	-0.615511	0.184033	-3.34458	0.000824082	0.00501728	NRIP3	nuclear receptor interacting protein 3 [Source:MGI Symbol;Acc:MGI:1925843]	0.652699
ENSMUSG00000037820	2047.51	-0.615278	0.0750413	-8.1992	2.41998e-16	2.07581e-14	TGM2	transglutaminase 2, C polypeptide [Source:MGI Symbol;Acc:MGI:98731]	0.652804
ENSMUSG00000041075	305.7	-0.615029	0.154977	-3.96852	7.23205e-05	0.000650413	FZD7	frizzled class receptor 7 [Source:MGI Symbol;Acc:MGI:108570]	0.652917
ENSMUSG00000103144	35.1323	-0.614833	0.194095	-3.1677	0.00153651	0.00849408	PCDHGA1	protocadherin gamma subfamily A, 1 [Source:MGI Symbol;Acc:MGI:1935212]	0.653005
ENSMUSG00000032890	34.1495	-0.612851	0.194722	-3.14731	0.00164778	0.00900402	RIMS3	regulating synaptic membrane exocytosis 3 [Source:MGI Symbol;Acc:MGI:2443331]	0.653903
ENSMUSG00000079293	879.237	-0.61275	0.158339	-3.86986	0.000108898	0.000917785	CLEC7A	C-type lectin domain family 7, member a [Source:MGI Symbol;Acc:MGI:1861431]	0.653949
ENSMUSG00000018428	249.102	-0.612455	0.128885	-4.75195	2.0146e-06	2.94559e-05	AKAP1	A kinase (PRKA) anchor protein 1 [Source:MGI Symbol;Acc:MGI:104729]	0.654083
ENSMUSG00000032113	14.4026	-0.611761	0.192201	-3.18291	0.00145801	0.00810941	CHEK1	checkpoint kinase 1 [Source:MGI Symbol;Acc:MGI:1202065]	0.654398
ENSMUSG00000011884	2272.88	-0.6112	0.0831676	-7.34901	1.99678e-13	1.25123e-11	GLTP	glycolipid transfer protein [Source:MGI Symbol;Acc:MGI:1929253]	0.654652
ENSMUSG00000072680	117.791	-0.60968	0.153072	-3.98296	6.80614e-05	0.000619032	TMEM254C	transmembrane protein 254c [Source:MGI Symbol;Acc:MGI:3711260]	0.655342
ENSMUSG00000097685	7.29464	-0.608714	0.193523	-3.14543	0.00165842	0.00905447	GM26646	predicted gene, 26646 [Source:MGI Symbol;Acc:MGI:5477140]	0.655781
ENSMUSG00000072812	4.46405	-0.608089	0.170071	-3.5755	0.000349562	0.00247308	AHNAK2	AHNAK nucleoprotein 2 [Source:MGI Symbol;Acc:MGI:2144831]	0.656065
ENSMUSG00000025318	221.824	-0.60691	0.129752	-4.67747	2.90434e-06	4.00384e-05	JPH3	junctophilin 3 [Source:MGI Symbol;Acc:MGI:1891497]	0.656602
ENSMUSG00000027580	28.4341	-0.60561	0.194703	-3.11043	0.00186813	0.00998474	HELZ2	helicase with zinc finger 2, transcriptional coactivator [Source:MGI Symbol;Acc:MGI:2385169]	0.657194
ENSMUSG00000021281	551.428	-0.605458	0.118502	-5.10927	3.23399e-07	5.99001e-06	TNFAIP2	tumor necrosis factor, alpha-induced protein 2 [Source:MGI Symbol;Acc:MGI:104960]	0.657263
ENSMUSG00000045136	261.928	-0.605042	0.144342	-4.19173	2.76833e-05	0.000286052	TUBB2B	tubulin, beta 2B class IIB [Source:MGI Symbol;Acc:MGI:1920960]	0.657452
ENSMUSG00000021708	318.397	-0.604619	0.191496	-3.15735	0.0015921	0.00873932	RASGRF2	RAS protein-specific guanine nucleotide-releasing factor 2 [Source:MGI Symbol;Acc:MGI:109137]	0.657645
ENSMUSG00000056737	593.594	-0.603088	0.105938	-5.69283	1.24952e-08	3.21542e-07	CAPG	capping protein (actin filament), gelsolin-like [Source:MGI Symbol;Acc:MGI:1098259]	0.658343
ENSMUSG00000024661	16489.3	-0.602965	0.0738795	-8.16147	3.30983e-16	2.78951e-14	FTH1	ferritin heavy polypeptide 1 [Source:MGI Symbol;Acc:MGI:95588]	0.6584
ENSMUSG00000063972	25.8157	-0.602475	0.182705	-3.29753	0.000975408	0.00578175	NR6A1	nuclear receptor subfamily 6, group A, member 1 [Source:MGI Symbol;Acc:MGI:1352459]	0.658623
ENSMUSG00000048915	6.51717	-0.601688	0.194657	-3.09102	0.00199472	0.0105467	EFNA5	ephrin A5 [Source:MGI Symbol;Acc:MGI:107444]	0.658982
ENSMUSG00000058542	16.9233	-0.601209	0.19396	-3.09965	0.00193747	0.0103068	GM15590	predicted gene 15590 [Source:MGI Symbol;Acc:MGI:3831433]	0.659201
ENSMUSG00000019370	457.285	-0.600018	0.0939664	-6.38545	1.7089e-10	6.46699e-09	CALM3	calmodulin 3 [Source:MGI Symbol;Acc:MGI:103249]	0.659746
ENSMUSG00000051506	789.267	-0.599501	0.128732	-4.65696	3.2092e-06	4.35873e-05	WDFY4	WD repeat and FYVE domain containing 4 [Source:MGI Symbol;Acc:MGI:3584510]	0.659982
ENSMUSG00000049130	3315.48	-0.598185	0.0938826	-6.37163	1.87035e-10	7.03658e-09	C5AR1	complement component 5a receptor 1 [Source:MGI Symbol;Acc:MGI:88232]	0.660585
ENSMUSG00000037266	26028.3	-0.597551	0.0674466	-8.85962	8.02845e-19	8.42115e-17	RSRP1	arginine/serine rich protein 1 [Source:MGI Symbol;Acc:MGI:106498]	0.660875
ENSMUSG00000054008	496.544	-0.597461	0.159305	-3.75042	0.000176541	0.00138732	NDST1	N-deacetylase/N-sulfotransferase (heparan glucosaminyl) 1 [Source:MGI Symbol;Acc:MGI:104719]	0.660916
ENSMUSG00000001249	198.199	-0.596263	0.115767	-5.15055	2.59728e-07	4.9338e-06	HPN	hepsin [Source:MGI Symbol;Acc:MGI:1196620]	0.661465
ENSMUSG00000026610	6.97828	-0.594041	0.161101	-3.68738	0.000226573	0.00171595	ESRRG	estrogen-related receptor gamma [Source:MGI Symbol;Acc:MGI:1347056]	0.662485
ENSMUSG00000038020	28.1604	-0.594004	0.173771	-3.41831	0.000630115	0.00401891	RAPGEFL1	Rap guanine nucleotide exchange factor (GEF)-like 1 [Source:MGI Symbol;Acc:MGI:3611446]	0.662502
ENSMUSG00000097944	117.73	-0.590823	0.153562	-3.84745	0.000119351	0.000987346	A130014A01RIK	RIKEN cDNA A130014A01 gene [Source:MGI Symbol;Acc:MGI:3028043]	0.663964
ENSMUSG00000082433	285.009	-0.589854	0.168954	-3.49121	0.000480836	0.0032178	GM9025	predicted gene 9025 [Source:MGI Symbol;Acc:MGI:3646679]	0.66441
ENSMUSG00000035355	10.2218	-0.589096	0.191322	-3.07907	0.00207645	0.0108606	KCNH4	potassium voltage-gated channel, subfamily H (eag-related), member 4 [Source:MGI Symbol;Acc:MGI:2156184]	0.664759
ENSMUSG00000053774	186.498	-0.588172	0.159186	-3.69487	0.000220001	0.00167628	UBXN7	UBX domain protein 7 [Source:MGI Symbol;Acc:MGI:2146388]	0.665185
ENSMUSG00000052364	12.257	-0.587783	0.194653	-3.01965	0.0025307	0.0128432	B630019K06RIK	RIKEN cDNA B630019K06 gene [Source:MGI Symbol;Acc:MGI:2147918]	0.665365
ENSMUSG00000014602	16.3106	-0.5876	0.189173	-3.10615	0.0018954	0.0101137	KIF1A	kinesin family member 1A [Source:MGI Symbol;Acc:MGI:108391]	0.665449
ENSMUSG00000010051	205.214	-0.58534	0.125381	-4.6685	3.03405e-06	4.1648e-05	HYAL1	hyaluronoglucosaminidase 1 [Source:MGI Symbol;Acc:MGI:96298]	0.666492
ENSMUSG00000042429	43.8844	-0.585261	0.165558	-3.53509	0.00040764	0.00281685	ADORA1	adenosine A1 receptor [Source:MGI Symbol;Acc:MGI:99401]	0.666529
ENSMUSG00000056222	9.89312	-0.581605	0.191698	-3.03397	0.00241357	0.012347	SPOCK1	sparc/osteonectin, cwcv and kazal-like domains proteoglycan 1 [Source:MGI Symbol;Acc:MGI:105371]	0.66822
ENSMUSG00000061510	51.8354	-0.58156	0.18536	-3.13746	0.00170416	0.00924923	GM10101	predicted gene 10101 [Source:MGI Symbol;Acc:MGI:3641713]	0.668241
ENSMUSG00000047945	331.62	-0.581342	0.0856632	-6.78637	1.14988e-11	5.36055e-10	MARCKSL1	MARCKS-like 1 [Source:MGI Symbol;Acc:MGI:97143]	0.668342
ENSMUSG00000100060	15.7955	-0.580901	0.192014	-3.02531	0.00248378	0.012656	GM17944	predicted gene, 17944 [Source:MGI Symbol;Acc:MGI:5010129]	0.668546
ENSMUSG00000063077	657.232	-0.580392	0.0977858	-5.93534	2.93237e-09	8.59631e-08	KIF1B	kinesin family member 1B [Source:MGI Symbol;Acc:MGI:108426]	0.668782
ENSMUSG00000024644	2464.03	-0.580145	0.0697487	-8.31765	8.97267e-17	8.01725e-15	CNDP2	CNDP dipeptidase 2 (metallopeptidase M20 family) [Source:MGI Symbol;Acc:MGI:1913304]	0.668897
ENSMUSG00000097090	50.6719	-0.579617	0.161227	-3.59503	0.00032435	0.00232712	GM26724	predicted gene, 26724 [Source:MGI Symbol;Acc:MGI:5477218]	0.669141
ENSMUSG00000064023	916.434	-0.579239	0.0701313	-8.25935	1.46464e-16	1.27908e-14	KLK8	kallikrein related-peptidase 8 [Source:MGI Symbol;Acc:MGI:1343327]	0.669317
ENSMUSG00000026072	46.2078	-0.578439	0.189021	-3.06019	0.002212	0.0114701	IL1R1	interleukin 1 receptor, type I [Source:MGI Symbol;Acc:MGI:96545]	0.669688
ENSMUSG00000053310	20.7421	-0.57825	0.194556	-2.97215	0.0029572	0.0145834	NRGN	neurogranin [Source:MGI Symbol;Acc:MGI:1927184]	0.669776
ENSMUSG00000022376	166.017	-0.576197	0.167647	-3.43698	0.000588246	0.00379958	ADCY8	adenylate cyclase 8 [Source:MGI Symbol;Acc:MGI:1341110]	0.670729
ENSMUSG00000051652	6427.39	-0.575122	0.0455335	-12.6308	1.42897e-36	5.99548e-34	LRRC3	leucine rich repeat containing 3 [Source:MGI Symbol;Acc:MGI:2447899]	0.67123
ENSMUSG00000028833	520.407	-0.573601	0.0891649	-6.43303	1.25085e-10	4.87706e-09	NCDN	neurochondrin [Source:MGI Symbol;Acc:MGI:1347351]	0.671938
ENSMUSG00000018341	92.432	-0.573595	0.15335	-3.74042	0.000183711	0.00143897	IL12RB2	interleukin 12 receptor, beta 2 [Source:MGI Symbol;Acc:MGI:1270861]	0.67194
ENSMUSG00000097705	332.317	-0.571845	0.136923	-4.17639	2.96166e-05	0.000302755	GM26740	predicted gene, 26740 [Source:MGI Symbol;Acc:MGI:5477234]	0.672756
ENSMUSG00000026437	66.6718	-0.57131	0.153613	-3.71915	0.000199897	0.0015463	CDK18	cyclin-dependent kinase 18 [Source:MGI Symbol;Acc:MGI:97518]	0.673006
ENSMUSG00000038508	6.5793	-0.571066	0.185054	-3.08595	0.00202904	0.0106804	GDF15	growth differentiation factor 15 [Source:MGI Symbol;Acc:MGI:1346047]	0.673119
ENSMUSG00000025579	3282.86	-0.570526	0.0822151	-6.93943	3.93689e-12	1.99428e-10	GAA	glucosidase, alpha, acid [Source:MGI Symbol;Acc:MGI:95609]	0.673371
ENSMUSG00000038256	247.889	-0.570123	0.122651	-4.64833	3.3464e-06	4.52665e-05	BCL9	B cell CLL/lymphoma 9 [Source:MGI Symbol;Acc:MGI:1924828]	0.673559
ENSMUSG00000024014	12.9145	-0.569696	0.193711	-2.94096	0.00327201	0.0158668	PIM1	proviral integration site 1 [Source:MGI Symbol;Acc:MGI:97584]	0.673759
ENSMUSG00000085379	22.1452	-0.569222	0.17325	-3.28555	0.00101784	0.00598911	2310058D17RIK	RIKEN cDNA 2310058D17 gene [Source:MGI Symbol;Acc:MGI:1922944]	0.67398
ENSMUSG00000104324	32.4041	-0.568987	0.184575	-3.08269	0.00205136	0.0107614	GM37320	predicted gene, 37320 [Source:MGI Symbol;Acc:MGI:5610548]	0.67409
ENSMUSG00000006411	823.942	-0.567967	0.091403	-6.21387	5.1694e-10	1.7721e-08	NECTIN4	nectin cell adhesion molecule 4 [Source:MGI Symbol;Acc:MGI:1918990]	0.674567
ENSMUSG00000003363	3854.58	-0.567035	0.0763777	-7.42408	1.13565e-13	7.30604e-12	PLD3	phospholipase D family, member 3 [Source:MGI Symbol;Acc:MGI:1333782]	0.675003
ENSMUSG00000039313	14.3338	-0.566963	0.185786	-3.0517	0.00227547	0.0117518	AF529169	cDNA sequence AF529169 [Source:MGI Symbol;Acc:MGI:2667167]	0.675036
ENSMUSG00000027514	86.196	-0.566527	0.169677	-3.33886	0.000841222	0.00510232	ZBP1	Z-DNA binding protein 1 [Source:MGI Symbol;Acc:MGI:1927449]	0.67524
ENSMUSG00000039512	576.67	-0.566449	0.11132	-5.08849	3.60927e-07	6.58402e-06	UHRF1BP1	UHRF1 (ICBP90) binding protein 1 [Source:MGI Symbol;Acc:MGI:3041238]	0.675277
ENSMUSG00000062591	40.0795	-0.566276	0.183845	-3.08019	0.0020687	0.0108347	TUBB4A	tubulin, beta 4A class IVA [Source:MGI Symbol;Acc:MGI:107848]	0.675358
ENSMUSG00000053334	352.37	-0.56558	0.0886827	-6.37757	1.79923e-10	6.79554e-09	FICD	FIC domain containing [Source:MGI Symbol;Acc:MGI:1098550]	0.675684
ENSMUSG00000091649	320.584	-0.565542	0.110117	-5.13582	2.80917e-07	5.2843e-06	PHF11B	PHD finger protein 11B [Source:MGI Symbol;Acc:MGI:3645789]	0.675702
ENSMUSG00000035168	64.5027	-0.564769	0.173018	-3.26422	0.00109764	0.00636936	TANC1	tetratricopeptide repeat, ankyrin repeat and coiled-coil containing 1 [Source:MGI Symbol;Acc:MGI:1914110]	0.676064
ENSMUSG00000027624	42.7388	-0.564511	0.162388	-3.47631	0.000508369	0.00337746	EPB41L1	erythrocyte membrane protein band 4.1 like 1 [Source:MGI Symbol;Acc:MGI:103010]	0.676184
ENSMUSG00000051339	114.197	-0.564093	0.164385	-3.43154	0.000600156	0.00386683	2900026A02RIK	RIKEN cDNA 2900026A02 gene [Source:MGI Symbol;Acc:MGI:1920194]	0.67638
ENSMUSG00000106837	32.9633	-0.564044	0.194075	-2.90632	0.00365708	0.0173718	D630030B08RIK	RIKEN cDNA D630030B08 gene [Source:MGI Symbol;Acc:MGI:2443017]	0.676403
ENSMUSG00000070044	226.153	-0.563703	0.105627	-5.33672	9.46448e-08	1.98118e-06	FAM149A	family with sequence similarity 149, member A [Source:MGI Symbol;Acc:MGI:2387177]	0.676563
ENSMUSG00000026104	1632.22	-0.562863	0.0747508	-7.52986	5.07941e-14	3.40391e-12	STAT1	signal transducer and activator of transcription 1 [Source:MGI Symbol;Acc:MGI:103063]	0.676957
ENSMUSG00000015750	674.851	-0.562765	0.102759	-5.47657	4.3366e-08	9.89318e-07	APH1A	aph1 homolog A, gamma secretase subunit [Source:MGI Symbol;Acc:MGI:2385110]	0.677003
ENSMUSG00000046432	102.469	-0.562702	0.123611	-4.5522	5.30866e-06	6.78974e-05	BEX3	brain expressed X-linked 3 [Source:MGI Symbol;Acc:MGI:1338016]	0.677033
ENSMUSG00000025175	32.9626	-0.562086	0.184817	-3.04132	0.00235544	0.0120968	FN3K	fructosamine 3 kinase [Source:MGI Symbol;Acc:MGI:1926834]	0.677322
ENSMUSG00000032532	6.654	-0.561833	0.185092	-3.03543	0.00240195	0.0123004	CCK	cholecystokinin [Source:MGI Symbol;Acc:MGI:88297]	0.677441
ENSMUSG00000032802	104.639	-0.561483	0.156332	-3.59161	0.000328639	0.00235003	SRXN1	sulfiredoxin 1 homolog (S. cerevisiae) [Source:MGI Symbol;Acc:MGI:104971]	0.677605
ENSMUSG00000028488	10.04	-0.561133	0.186853	-3.00307	0.00267267	0.0134225	SH3GL2	SH3-domain GRB2-like 2 [Source:MGI Symbol;Acc:MGI:700009]	0.67777
ENSMUSG00000071658	12.9553	-0.560242	0.189259	-2.96018	0.00307458	0.0150728	GNG3	guanine nucleotide binding protein (G protein), gamma 3 [Source:MGI Symbol;Acc:MGI:102704]	0.678188
ENSMUSG00000030249	10.0252	-0.559816	0.157202	-3.56113	0.000369267	0.00259347	ABCC9	ATP-binding cassette, sub-family C (CFTR/MRP), member 9 [Source:MGI Symbol;Acc:MGI:1352630]	0.678389
ENSMUSG00000030084	104.844	-0.559755	0.144424	-3.87578	0.000106282	0.000898489	PLXNA1	plexin A1 [Source:MGI Symbol;Acc:MGI:107685]	0.678417
ENSMUSG00000038437	71.9158	-0.559462	0.161338	-3.46765	0.00052504	0.00346674	MLLT6	myeloid/lymphoid or mixed-lineage leukemia; translocated to, 6 [Source:MGI Symbol;Acc:MGI:1935145]	0.678555
ENSMUSG00000051515	18.3471	-0.559371	0.183108	-3.05486	0.00225166	0.0116473	FAM181B	family with sequence similarity 181, member B [Source:MGI Symbol;Acc:MGI:1930951]	0.678598
ENSMUSG00000025647	4466.07	-0.559174	0.0726452	-7.69732	1.38944e-14	9.85893e-13	SHISA5	shisa family member 5 [Source:MGI Symbol;Acc:MGI:1915044]	0.678691
ENSMUSG00000079491	20.9463	-0.558885	0.185458	-3.01355	0.00258214	0.0130585	H2-T10	histocompatibility 2, T region locus 10 [Source:MGI Symbol;Acc:MGI:95942]	0.678827
ENSMUSG00000032249	388.415	-0.558827	0.126309	-4.42427	9.67669e-06	0.000114436	ANP32A	acidic (leucine-rich) nuclear phosphoprotein 32 family, member A [Source:MGI Symbol;Acc:MGI:108447]	0.678854
ENSMUSG00000000594	3804.59	-0.558078	0.0589985	-9.4592	3.10321e-21	4.33999e-19	GM2A	GM2 ganglioside activator protein [Source:MGI Symbol;Acc:MGI:95762]	0.679206
ENSMUSG00000037572	55.4828	-0.557817	0.170228	-3.27689	0.00104958	0.00614217	WDHD1	WD repeat and HMG-box DNA binding protein 1 [Source:MGI Symbol;Acc:MGI:2443514]	0.679329
ENSMUSG00000029580	19217.9	-0.557055	0.10826	-5.14555	2.66741e-07	5.05212e-06	ACTB	actin, beta [Source:MGI Symbol;Acc:MGI:87904]	0.679688
ENSMUSG00000026478	156.657	-0.556795	0.142435	-3.90913	9.26281e-05	0.000796668	LAMC1	laminin, gamma 1 [Source:MGI Symbol;Acc:MGI:99914]	0.679811
ENSMUSG00000024401	66.2774	-0.556755	0.161475	-3.44794	0.000564873	0.00367692	TNF	tumor necrosis factor [Source:MGI Symbol;Acc:MGI:104798]	0.679829
ENSMUSG00000022463	359.802	-0.556455	0.102712	-5.41761	6.04009e-08	1.33532e-06	SREBF2	sterol regulatory element binding factor 2 [Source:MGI Symbol;Acc:MGI:107585]	0.679971
ENSMUSG00000026944	657.518	-0.555793	0.12525	-4.43748	9.1019e-06	0.00010857	ABCA2	ATP-binding cassette, sub-family A (ABC1), member 2 [Source:MGI Symbol;Acc:MGI:99606]	0.680283
ENSMUSG00000031740	688.096	-0.555115	0.0890991	-6.23032	4.65497e-10	1.61005e-08	MMP2	matrix metallopeptidase 2 [Source:MGI Symbol;Acc:MGI:97009]	0.680603
ENSMUSG00000035678	38.4724	-0.554808	0.167384	-3.31459	0.000917788	0.00550103	TNFSF9	tumor necrosis factor (ligand) superfamily, member 9 [Source:MGI Symbol;Acc:MGI:1101058]	0.680748
ENSMUSG00000018921	217.212	-0.554803	0.109537	-5.065	4.08393e-07	7.35946e-06	PELP1	proline, glutamic acid and leucine rich protein 1 [Source:MGI Symbol;Acc:MGI:1922523]	0.68075
ENSMUSG00000057315	386.707	-0.554741	0.0839046	-6.61156	3.80285e-11	1.62378e-09	ARHGAP24	Rho GTPase activating protein 24 [Source:MGI Symbol;Acc:MGI:1922647]	0.680779
ENSMUSG00000045746	34.2054	-0.553924	0.183055	-3.02599	0.00247821	0.0126346	B230317F23RIK	RIKEN cDNA B230317F23 gene [Source:MGI Symbol;Acc:MGI:2443920]	0.681165
ENSMUSG00000098702	74.0116	-0.553329	0.159556	-3.46793	0.000524493	0.00346549	1500015A07RIK	RIKEN cDNA 1500015A07 gene [Source:MGI Symbol;Acc:MGI:1916232]	0.681446
ENSMUSG00000049502	968.113	-0.553035	0.0975768	-5.66769	1.44738e-08	3.68528e-07	DTX3L	deltex 3-like, E3 ubiquitin ligase [Source:MGI Symbol;Acc:MGI:2656973]	0.681585
ENSMUSG00000020175	15.8695	-0.551123	0.189822	-2.90337	0.00369167	0.0175146	RAB36	RAB36, member RAS oncogene family [Source:MGI Symbol;Acc:MGI:1924127]	0.682489
ENSMUSG00000097147	90.9105	-0.550578	0.151078	-3.64433	0.000268088	0.00197862	GM26780	predicted gene, 26780 [Source:MGI Symbol;Acc:MGI:5477274]	0.682747
ENSMUSG00000044117	7.75424	-0.54975	0.187995	-2.92428	0.0034525	0.0165713	2900011O08RIK	RIKEN cDNA 2900011O08 gene [Source:MGI Symbol;Acc:MGI:1914504]	0.683138
ENSMUSG00000086392	15.6738	-0.548778	0.185821	-2.95327	0.00314427	0.0153399	MCCC1OS	methylcrotonoyl-Coenzyme A carboxylase 1 (alpha), opposite strand [Source:MGI Symbol;Acc:MGI:3590669]	0.683599
ENSMUSG00000030124	914.905	-0.547854	0.113922	-4.80902	1.51676e-06	2.28877e-05	LAG3	lymphocyte-activation gene 3 [Source:MGI Symbol;Acc:MGI:106588]	0.684037
ENSMUSG00000072915	317.938	-0.547831	0.115311	-4.75089	2.0252e-06	2.95215e-05	GM12258	predicted gene 12258 [Source:MGI Symbol;Acc:MGI:3651534]	0.684048
ENSMUSG00000029752	40.1003	-0.547487	0.171293	-3.19619	0.00139254	0.00781735	ASNS	asparagine synthetase [Source:MGI Symbol;Acc:MGI:1350929]	0.684211
ENSMUSG00000021638	117.046	-0.547466	0.138334	-3.95757	7.5716e-05	0.000674663	OCLN	occludin [Source:MGI Symbol;Acc:MGI:106183]	0.684221
ENSMUSG00000027536	14.5894	-0.546562	0.186782	-2.92621	0.00343121	0.0164896	CHMP4C	charged multivesicular body protein 4C [Source:MGI Symbol;Acc:MGI:1913621]	0.68465
ENSMUSG00000003575	277.119	-0.546359	0.0866844	-6.30285	2.92217e-10	1.05866e-08	CRTC1	CREB regulated transcription coactivator 1 [Source:MGI Symbol;Acc:MGI:2142523]	0.684746
ENSMUSG00000046805	7562.69	-0.546137	0.169641	-3.21938	0.00128469	0.0072968	MPEG1	macrophage expressed gene 1 [Source:MGI Symbol;Acc:MGI:1333743]	0.684851
ENSMUSG00000024892	172.291	-0.546122	0.112133	-4.87029	1.11435e-06	1.7528e-05	PCX	pyruvate carboxylase [Source:MGI Symbol;Acc:MGI:97520]	0.684859
ENSMUSG00000026893	147.859	-0.545372	0.127905	-4.2639	2.00893e-05	0.000217018	GCA	grancalcin [Source:MGI Symbol;Acc:MGI:1918521]	0.685215
ENSMUSG00000028487	12.1285	-0.545174	0.187538	-2.907	0.00364909	0.0173424	BNC2	basonuclin 2 [Source:MGI Symbol;Acc:MGI:2443805]	0.685309
ENSMUSG00000001473	286.255	-0.545139	0.0881019	-6.18759	6.10894e-10	2.06123e-08	TUBB6	tubulin, beta 6 class V [Source:MGI Symbol;Acc:MGI:1915201]	0.685325
ENSMUSG00000027500	8.48021	-0.544422	0.180138	-3.02224	0.0025091	0.0127536	STMN2	stathmin-like 2 [Source:MGI Symbol;Acc:MGI:98241]	0.685666
ENSMUSG00000026981	62.1156	-0.544269	0.193469	-2.8132	0.00490504	0.0221703	IL1RN	interleukin 1 receptor antagonist [Source:MGI Symbol;Acc:MGI:96547]	0.685739
ENSMUSG00000062382	1181.05	-0.543614	0.070486	-7.71236	1.23508e-14	8.86133e-13	FTL1-PS1	ferritin light polypeptide 1, pseudogene 1 [Source:MGI Symbol;Acc:MGI:3779109]	0.68605
ENSMUSG00000043263	265.018	-0.543276	0.137169	-3.96064	7.47484e-05	0.0006682	IFI209	interferon activated gene 209 [Source:MGI Symbol;Acc:MGI:2138243]	0.686211
ENSMUSG00000040009	20.1032	-0.542914	0.188587	-2.87884	0.00399135	0.0186476	GNAZ	guanine nucleotide binding protein, alpha z subunit [Source:MGI Symbol;Acc:MGI:95780]	0.686383
ENSMUSG00000034118	274.199	-0.542807	0.120854	-4.49143	7.0747e-06	8.75539e-05	TPST1	protein-tyrosine sulfotransferase 1 [Source:MGI Symbol;Acc:MGI:1298231]	0.686434
ENSMUSG00000035561	35.0378	-0.54238	0.185276	-2.92741	0.00341796	0.0164382	ALDH1B1	aldehyde dehydrogenase 1 family, member B1 [Source:MGI Symbol;Acc:MGI:1919785]	0.686637
ENSMUSG00000039501	1949.83	-0.541863	0.099628	-5.43886	5.36224e-08	1.19782e-06	ZNFX1	zinc finger, NFX1-type containing 1 [Source:MGI Symbol;Acc:MGI:2138982]	0.686883
ENSMUSG00000097748	28.3488	-0.540114	0.180718	-2.98871	0.00280157	0.0139572	GM26533	predicted gene, 26533 [Source:MGI Symbol;Acc:MGI:5477027]	0.687716
ENSMUSG00000049521	43.3791	-0.539684	0.186788	-2.88928	0.0038612	0.0181848	CDC42EP1	CDC42 effector protein (Rho GTPase binding) 1 [Source:MGI Symbol;Acc:MGI:1929763]	0.687922
ENSMUSG00000039347	14.1022	-0.539272	0.194687	-2.76994	0.00560665	0.0247446	ATP6V0E2	ATPase, H+ transporting, lysosomal V0 subunit E2 [Source:MGI Symbol;Acc:MGI:1923502]	0.688118
ENSMUSG00000105842	21.3461	-0.539224	0.194233	-2.77617	0.00550042	0.0243426	GM43329	predicted gene 43329 [Source:MGI Symbol;Acc:MGI:5663466]	0.688141
ENSMUSG00000103957	16.1579	-0.538761	0.191654	-2.81111	0.00493709	0.0222891	GM10766	predicted gene 10766 [Source:MGI Symbol;Acc:MGI:3642134]	0.688362
ENSMUSG00000030806	8.21668	-0.538514	0.174856	-3.07976	0.0020717	0.0108465	STX1B	syntaxin 1B [Source:MGI Symbol;Acc:MGI:1930705]	0.68848
ENSMUSG00000052928	24.7083	-0.537821	0.173709	-3.0961	0.00196083	0.0104167	CTIF	CBP80/20-dependent translation initiation factor [Source:MGI Symbol;Acc:MGI:2685518]	0.68881
ENSMUSG00000022265	680.96	-0.537736	0.0956318	-5.62298	1.87694e-08	4.63827e-07	ANK	progressive ankylosis [Source:MGI Symbol;Acc:MGI:3045421]	0.688851
ENSMUSG00000048965	257.475	-0.536941	0.120981	-4.43823	9.07e-06	0.000108257	MRGPRE	MAS-related GPR, member E [Source:MGI Symbol;Acc:MGI:2441884]	0.689231
ENSMUSG00000021087	1940.17	-0.536597	0.0753907	-7.11755	1.0986e-12	6.16367e-11	RTN1	reticulon 1 [Source:MGI Symbol;Acc:MGI:1933947]	0.689395
ENSMUSG00000106706	63.4265	-0.535097	0.174629	-3.0642	0.00218253	0.0113447	C530043K16RIK	RIKEN cDNA C530043K16 gene [Source:MGI Symbol;Acc:MGI:2444587]	0.690112
ENSMUSG00000084821	33.2471	-0.53492	0.185658	-2.88121	0.00396151	0.0185306	GM15880	predicted gene 15880 [Source:MGI Symbol;Acc:MGI:3802014]	0.690197
ENSMUSG00000016763	131.406	-0.534815	0.129206	-4.13923	3.48478e-05	0.000347757	SCUBE1	signal peptide, CUB domain, EGF-like 1 [Source:MGI Symbol;Acc:MGI:1890616]	0.690247
ENSMUSG00000045665	1929.74	-0.534809	0.0753632	-7.09642	1.28028e-12	7.14147e-11	MFSD5	major facilitator superfamily domain containing 5 [Source:MGI Symbol;Acc:MGI:2145901]	0.69025
ENSMUSG00000018819	1310.98	-0.534374	0.0990153	-5.39688	6.78096e-08	1.47048e-06	LSP1	lymphocyte specific 1 [Source:MGI Symbol;Acc:MGI:96832]	0.690458
ENSMUSG00000027860	174.98	-0.534244	0.142903	-3.73851	0.000185117	0.00144806	VANGL1	vang-like 1 (van gogh, Drosophila) [Source:MGI Symbol;Acc:MGI:2159344]	0.69052
ENSMUSG00000038776	373.297	-0.533933	0.0872211	-6.1216	9.2642e-10	3.02711e-08	EPHX1	epoxide hydrolase 1, microsomal [Source:MGI Symbol;Acc:MGI:95405]	0.690669
ENSMUSG00000030091	132.282	-0.533564	0.163171	-3.26997	0.0010756	0.00626577	NUP210	nucleoporin 210 [Source:MGI Symbol;Acc:MGI:1859555]	0.690846
ENSMUSG00000040896	9.07081	-0.533462	0.180053	-2.9628	0.00304852	0.0149635	KCND3	potassium voltage-gated channel, Shal-related family, member 3 [Source:MGI Symbol;Acc:MGI:1928743]	0.690895
ENSMUSG00000028073	408.627	-0.532995	0.128428	-4.15013	3.32285e-05	0.000334364	PEAR1	platelet endothelial aggregation receptor 1 [Source:MGI Symbol;Acc:MGI:1920432]	0.691119
ENSMUSG00000022945	19.1729	-0.532188	0.178837	-2.97583	0.00292201	0.0144417	CHAF1B	chromatin assembly factor 1, subunit B (p60) [Source:MGI Symbol;Acc:MGI:1314881]	0.691505
ENSMUSG00000052911	389.651	-0.531965	0.11567	-4.59899	4.24538e-06	5.57387e-05	LAMB2	laminin, beta 2 [Source:MGI Symbol;Acc:MGI:99916]	0.691612
ENSMUSG00000022055	14.3634	-0.531248	0.192077	-2.76581	0.00567819	0.0250089	NEFL	neurofilament, light polypeptide [Source:MGI Symbol;Acc:MGI:97313]	0.691956
ENSMUSG00000045092	1557.59	-0.530043	0.08979	-5.90314	3.56653e-09	1.02431e-07	S1PR1	sphingosine-1-phosphate receptor 1 [Source:MGI Symbol;Acc:MGI:1096355]	0.692534
ENSMUSG00000017667	55.9333	-0.528853	0.171406	-3.08539	0.00203285	0.0106963	ZFP334	zinc finger protein 334 [Source:MGI Symbol;Acc:MGI:2388656]	0.693105
ENSMUSG00000027951	1080.32	-0.52762	0.0813898	-6.48262	9.01412e-11	3.60939e-09	ADAR	adenosine deaminase, RNA-specific [Source:MGI Symbol;Acc:MGI:1889575]	0.693698
ENSMUSG00000030283	24.2121	-0.526772	0.190885	-2.75962	0.00578679	0.0253887	ST8SIA1	ST8 alpha-N-acetyl-neuraminide alpha-2,8-sialyltransferase 1 [Source:MGI Symbol;Acc:MGI:106011]	0.694106
ENSMUSG00000028270	159.689	-0.526431	0.137662	-3.82409	0.000131258	0.00107434	GBP2	guanylate binding protein 2 [Source:MGI Symbol;Acc:MGI:102772]	0.69427
ENSMUSG00000020785	448.976	-0.524239	0.0883273	-5.93518	2.93522e-09	8.59631e-08	CAMKK1	calcium/calmodulin-dependent protein kinase kinase 1, alpha [Source:MGI Symbol;Acc:MGI:1891766]	0.695326
ENSMUSG00000032352	34.942	-0.52395	0.185845	-2.81928	0.00481316	0.0218369	LRRC1	leucine rich repeat containing 1 [Source:MGI Symbol;Acc:MGI:2442313]	0.695465
ENSMUSG00000024548	37.6271	-0.523921	0.184621	-2.83781	0.00454237	0.0208336	SETBP1	SET binding protein 1 [Source:MGI Symbol;Acc:MGI:1933199]	0.695479
ENSMUSG00000013921	11.7904	-0.523206	0.193162	-2.70864	0.00675588	0.0288406	CLIP3	CAP-GLY domain containing linker protein 3 [Source:MGI Symbol;Acc:MGI:1923936]	0.695824
[truncated: 1,503 more rows]
